# Supplementary material for: Optimal Macroeconomic Policy in Nonlinear Models: A VSTAR Perspective
Source: publisher site journal article supplement (doi:10.1515/snde-2024-0100), 2025-10-08
Supplement: Supplementary file 2 [file AAA_RESULTS.xlsx]

## Sheet: DataHistory
No	observation_date	y1	y2	y3	y4	y5	y6	y7
1	1979-08-01	1.11	9.27066	1.41123	-0.226667	4.20751	1.58223	10.94
2	1979-09-01	1.1	9.61083	1.26343	-0.323333	4.20877	1.55687	11.43
3	1979-10-01	0.68	9.63252	1.01531	-0.22	4.20191	1.50524	13.77
4	1979-11-01	1.61	9.76874	0.16667	-0.32	4.23323	1.58857	13.18
5	1979-12-01	1.73	10.1769	-0.23919	-0.22	4.07738	1.62823	13.78
6	1980-01-01	1.29	10.4974	0.86457	0.08	4.0317	1.44212	13.82
7	1980-02-01	0.85	11.1021	0.32775	0.0833333	4.02174	1.52836	14.13
8	1980-03-01	1.81	11.5937	-0.31553	0.0866667	4.21597	1.50556	17.19
9	1980-04-01	3.43	11.0207	-1.24247	0.69	4.24777	1.58478	17.61
10	1980-05-01	2.92	10.7363	-4.40755	1.29333	4.30235	1.66798	10.98
11	1980-06-01	2.62	10.5245	-5.59365	1.39667	4.22455	1.41703	9.47
12	1980-07-01	1.89	10.5384	-6.20079	1.6	4.18616	1.47104	9.03
13	1980-08-01	1.6	10.6125	-5.23076	1.5	4.09345	1.45128	9.61
14	1980-09-01	1.84	10.6593	-3.80193	1.3	4.10235	1.47903	10.87
15	1980-10-01	1.77	10.6464	-3.11449	1.3	4.0366	1.46743	12.81
16	1980-11-01	1.92	10.7779	-1.34521	1.30333	3.93041	1.53821	15.85
17	1980-12-01	2.71	10.5671	-0.92675	1.00667	3.87587	1.59994	18.9
18	1981-01-01	2.35	10.4728	-1.93133	1.31	3.68535	1.37475	19.08
19	1981-02-01	1.94	10.3932	-2.40338	1.21333	3.71765	1.50348	15.93
20	1981-03-01	2.21	9.81436	-1.55171	1.21667	3.7635	1.49596	14.7
21	1981-04-01	1.45	9.72126	0.05552	1.02	3.7956	1.84077	15.72
22	1981-05-01	2.45	9.36379	3.16024	1.32333	3.66775	1.46672	18.52
23	1981-06-01	1.94	9.10977	4.95435	1.32667	3.69774	1.44397	19.1
24	1981-07-01	1.5	8.92334	6.46854	1.03	3.70707	1.44059	19.04
25	1981-08-01	0.93	8.69826	6.07431	1.23333	3.75929	1.29007	17.82
26	1981-09-01	1.08	8.35436	3.77156	1.43667	3.7974	1.37865	15.87
27	1981-10-01	2.48	7.97856	1.77394	1.74	3.70319	1.36707	15.08
28	1981-11-01	3.26	7.68222	-1.09751	2.14333	3.85766	1.36892	13.31
29	1981-12-01	2.57	7.31855	-2.72876	2.34667	3.90633	1.53317	12.37
30	1982-01-01	2.96	6.9285	-4.11883	2.45	3.86467	1.48578	13.22
31	1982-02-01	3.15	6.17456	-1.76612	2.75333	3.83328	1.29357	14.78
32	1982-03-01	2.64	5.71267	-3.02928	2.85667	3.74287	1.38839	14.68
33	1982-04-01	2.91	5.3065	-3.45824	3.16	3.84655	1.57453	14.94
34	1982-05-01	2.93	5.45573	-4.64393	3.26333	3.85129	1.23134	14.45
35	1982-06-01	2.48	5.80102	-5.41047	3.46667	3.78569	1.32458	14.15
36	1982-07-01	3.12	5.78843	-6.31815	3.67	3.94894	1.27679	12.59
37	1982-08-01	3.51	5.45856	-7.12695	3.67333	3.98822	1.28561	10.12
38	1982-09-01	3.9	5.11379	-6.86257	3.97667	3.84326	1.2802	10.31
39	1982-10-01	4.02	5.22852	-7.06752	4.28	3.89718	1.29926	9.71
40	1982-11-01	3.51	4.97868	-6.36239	4.68333	3.92945	1.29801	9.2
41	1982-12-01	3.78	4.81374	-6.01547	4.68667	3.90751	1.53221	8.95
42	1983-01-01	3.14	4.68184	-2.25194	4.29	3.83257	1.34888	8.68
43	1983-02-01	3.68	4.54536	-4.74175	4.29333	3.81824	1.4765	8.51
44	1983-03-01	2.99	4.41148	-3.23116	4.19667	3.79998	1.2794	8.77
45	1983-04-01	3.02	4.83342	-1.17105	4.1	3.83855	1.45318	8.8
46	1983-05-01	2.28	4.51322	0.14042	4.00333	3.89283	1.20391	8.63
47	1983-06-01	2.41	4.14658	1.07867	4.00667	3.85305	1.21602	8.98
48	1983-07-01	1.63	4.11587	2.93359	3.31	3.88975	1.15635	9.37
49	1983-08-01	1.66	4.23931	4.99777	3.41	3.87251	1.25906	9.56
50	1983-09-01	2.11	4.3133	6.91502	3.11	3.86202	1.28846	9.45
51	1983-10-01	1.72	3.9089	8.77257	2.71	3.88099	1.14046	9.48
52	1983-11-01	1.98	3.74391	9.59167	2.41333	3.89927	1.12877	9.34
53	1983-12-01	1.93	3.64517	10.9685	2.21667	3.9421	1.20715	9.47
54	1984-01-01	1.98	3.61173	11.0274	1.92	3.83053	1.23545	9.56
55	1984-02-01	1.55	4.13189	12.218	1.72333	3.57307	1.15153	9.59
56	1984-03-01	1.46	4.34006	11.8525	1.72667	3.66396	1.07602	9.91
57	1984-04-01	1.49	4.2611	11.212	1.63	3.86116	1.32943	10.29
58	1984-05-01	0.83	4.09619	10.9652	1.33333	3.80958	1.15365	10.32
59	1984-06-01	1.21	3.89418	10.6912	1.13667	3.76677	1.09111	11.06
60	1984-07-01	2.24	3.68262	9.38331	1.44	3.67673	1.15076	11.23
61	1984-08-01	1.84	3.55628	8.27357	1.44333	3.63043	1.15016	11.64
62	1984-09-01	1.88	3.33761	6.46436	1.24667	3.71882	1.18688	11.3
63	1984-10-01	2.15	3.40386	5.42357	1.35	3.57281	1.18675	9.99
64	1984-11-01	1.9	3.4031	5.45794	1.15333	3.71703	1.15028	9.43
65	1984-12-01	1.85	3.63673	5.04116	1.25667	3.84322	1.07762	8.38
66	1985-01-01	2.09	3.70444	2.81881	1.26	3.67404	1.08828	8.35
67	1985-02-01	1.32	3.49021	2.73151	1.16333	3.65735	1.06455	8.5
68	1985-03-01	2.04	3.55351	2.39272	1.16667	3.72472	1.0193	8.58
69	1985-04-01	2.1	3.31269	1.46468	1.27	3.88176	1.07961	8.27
70	1985-05-01	2.87	3.42796	1.14912	1.17333	3.80796	1.06762	7.97
71	1985-06-01	2.15	3.52348	0.86285	1.37667	3.81718	1.00683	7.53
72	1985-07-01	1.86	3.40772	-0.10876	1.38	3.80906	1.0939	7.88
73	1985-08-01	2.22	3.43221	0.21021	1.08333	3.81159	1.04124	7.9
74	1985-09-01	2.17	3.46633	0.82075	1.08667	3.8599	1.13363	7.92
75	1985-10-01	2.35	3.39432	0.56898	1.09	3.64308	1.04617	7.99
76	1985-11-01	2.4	3.54991	0.51137	0.993333	3.75981	1.07454	8.05
77	1985-12-01	2.58	3.60733	1.4503	0.996667	3.96133	1.14868	8.27
78	1986-01-01	2.36	3.56445	2.09258	0.7	3.95171	1.12949	8.14
79	1986-02-01	2.98	3.08637	1.05582	1.20333	3.89061	1.02883	7.86
80	1986-03-01	3.11	2.46062	0.20949	1.20667	3.84058	1.1228	7.48
81	1986-04-01	2.81	2.10033	0.52211	1.11	3.83496	1.30828	6.99
82	1986-05-01	2.24	2.04615	0.59004	1.21667	3.97491	1.14833	6.85
83	1986-06-01	2.99	2.14822	0.18727	1.22333	3.9655	1.03159	6.92
84	1986-07-01	2.82	1.92453	1.40189	1.03	3.9956	1.04929	6.56
85	1986-08-01	3.23	1.71547	0.85595	0.933333	4.01302	1.02843	6.17
86	1986-09-01	2.75	1.87559	0.62732	1.03667	4.0131	1.10766	5.89
87	1986-10-01	2.9	1.8893	1.52308	1.04	4.04287	1.0419	5.85
88	1986-11-01	2.92	1.77566	1.65154	0.943333	4.09535	1.08035	6.04
89	1986-12-01	2.74	1.57078	1.43272	0.646667	4.20421	1.4551	6.91
90	1987-01-01	2.54	1.5784	0.65624	0.65	4.2685	1.17999	6.43
91	1987-02-01	2.46	1.93553	2.64481	0.656667	4.00077	1.03462	6.1
92	1987-03-01	2.1	2.42749	3.49974	0.663333	4.07153	0.999674	6.13
93	1987-04-01	1.83	3.02157	4.10109	0.37	4.25683	1.28847	6.37
94	1987-05-01	2.02	3.09393	4.55253	0.373333	4.25995	1.24641	6.85
95	1987-06-01	2.14	3.10282	5.39225	0.276667	4.33704	1.11205	6.73
96	1987-07-01	1.95	3.31264	5.5385	0.18	4.22343	0.975483	6.58
97	1987-08-01	1.8	3.5908	6.55136	0.0866667	4.17827	1.08925	6.73
98	1987-09-01	1.68	3.60118	6.6148	-0.00666667	4.26711	0.995863	7.22
99	1987-10-01	2.74	3.74341	7.65207	0.1	4.22231	1.24241	7.29
100	1987-11-01	2.24	3.75692	7.72447	-0.0966667	4.28511	0.920297	6.69
101	1987-12-01	2.46	3.80673	7.34255	-0.193333	4.32635	1.08619	6.77
102	1988-01-01	2.81	3.72712	7.71747	-0.19	4.31453	0.979073	6.83
103	1988-02-01	2.46	3.51438	6.80042	-0.183333	4.20364	0.870007	6.58
104	1988-03-01	2	3.5993	6.88002	-0.176667	4.17693	0.914049	6.58
105	1988-04-01	2.03	3.7158	6.81665	-0.47	4.29567	0.98745	6.87
106	1988-05-01	1.84	3.75315	5.99437	-0.263333	4.12217	0.921017	7.09
107	1988-06-01	2.18	3.80169	5.76951	-0.456667	4.24627	1.05701	7.51
108	1988-07-01	1.99	4.0666	5.08373	-0.45	4.17819	0.947768	7.75
109	1988-08-01	1.96	3.96509	4.67547	-0.243333	4.18652	0.95454	8.01
110	1988-09-01	2.03	4.12044	4.12367	-0.436667	4.21621	1.07299	8.19
111	1988-10-01	1.76	4.12862	3.13213	-0.43	4.1534	0.948123	8.3
112	1988-11-01	1.42	4.17197	2.75337	-0.523333	4.20657	1.02486	8.35
113	1988-12-01	1.51	4.30536	2.75216	-0.516667	4.26675	1.10384	8.76
114	1989-01-01	1.64	4.43266	3.01275	-0.41	4.22724	1.01413	9.12
115	1989-02-01	1.29	4.62788	2.10559	-0.603333	4.05157	0.997802	9.36
116	1989-03-01	1.37	4.65563	2.11523	-0.796667	4.08559	0.949894	9.85
117	1989-04-01	1.59	4.84356	1.62562	-0.59	4.205	0.999793	9.84
118	1989-05-01	1.86	4.92144	1.05447	-0.583333	3.96332	1.09081	9.81
119	1989-06-01	1.93	4.70542	0.84887	-0.476667	4.0768	1.16249	9.53
120	1989-07-01	2.05	4.44899	-0.08904	-0.57	3.86098	1.15157	9.24
121	1989-08-01	1.62	4.15139	0.38212	-0.563333	3.78701	1.15528	8.99
122	1989-09-01	1.6	3.87724	0.29885	-0.456667	3.84934	1.18834	9.02
123	1989-10-01	1.89	3.94453	-0.2624	-0.45	3.68648	1.23129	8.84
124	1989-11-01	1.97	3.93028	-0.09368	-0.343333	3.95396	1.24613	8.55
125	1989-12-01	1.89	3.90622	0.04231	-0.336667	4.01228	1.30864	8.45
126	1990-01-01	1.51	4.16043	-0.92843	-0.33	3.71877	1.25395	8.23
127	1990-02-01	1.63	4.27233	0.51409	-0.423333	3.71296	1.22906	8.24
128	1990-03-01	1.56	4.27653	0.76923	-0.516667	3.71829	1.255	8.28
129	1990-04-01	1.26	3.80366	0.5233	-0.31	3.75743	1.23328	8.26
130	1990-05-01	1.81	3.65926	1.44375	-0.303333	3.75457	1.26778	8.18
131	1990-06-01	1.79	3.88871	1.72282	-0.496667	3.85172	1.23023	8.29
132	1990-07-01	1.84	3.89754	2.5116	-0.19	3.84471	1.22205	8.15
133	1990-08-01	1.55	4.57649	1.89846	0.0166667	3.88445	1.20607	8.13
134	1990-09-01	1.82	4.9849	2.39855	0.223333	3.93754	1.22959	8.2
135	1990-10-01	2.09	5.17478	1.70487	0.23	3.95959	1.28738	8.11
136	1990-11-01	2.36	5.07863	0.17917	0.533333	4.05687	1.22253	7.81
137	1990-12-01	2.35	4.87368	-1.07882	0.636667	4.00942	1.28833	7.31
138	1991-01-01	2.42	4.48021	-0.84677	0.74	3.92022	1.25435	6.91
139	1991-02-01	2.05	4.07478	-2.49751	0.946667	3.9536	1.20162	6.25
140	1991-03-01	2.04	3.7056	-3.48147	1.15333	3.95712	1.18995	6.12
141	1991-04-01	1.92	3.67707	-3.12219	1.06	3.90085	1.14729	5.91
142	1991-05-01	1.8	3.87289	-2.36921	1.26667	4.02448	1.16693	5.78
143	1991-06-01	1.72	3.59076	-1.79905	1.27333	4.06482	1.15186	5.9
144	1991-07-01	1.69	3.49797	-1.57805	1.18	4.01514	1.09854	5.82
145	1991-08-01	1.83	3.05171	-1.79758	1.28667	4.06466	1.03142	5.66
146	1991-09-01	2.04	2.77669	-1.06673	1.29333	4.10506	1.03848	5.45
147	1991-10-01	2.02	2.38314	-0.47959	1.4	4.10313	1.05114	5.21
148	1991-11-01	2.07	2.47791	0.58423	1.40333	4.20102	1.02122	4.81
149	1991-12-01	2.55	2.63848	0.84454	1.70667	4.35898	1.11672	4.43
150	1992-01-01	1.82	2.38897	0.72694	1.71	4.14763	1.07055	4.03
151	1992-02-01	1.96	2.59626	2.13668	1.81667	4.16763	1.03248	4.06
152	1992-03-01	1.71	2.82427	3.54137	1.82333	4.16069	1.02119	3.98
153	1992-04-01	1.6	2.9147	4.10747	1.83	4.14438	1.00328	3.73
154	1992-05-01	1.8	2.62483	3.41777	2.03667	4.30856	1.00737	3.82
155	1992-06-01	1.91	2.6342	2.5011	2.24333	4.2723	0.967494	3.76
156	1992-07-01	2.12	2.81059	3.31425	2.15	4.18685	0.973247	3.25
157	1992-08-01	2.03	2.711	2.72567	2.05333	4.22207	0.956636	3.3
158	1992-09-01	2.25	2.52521	2.06274	2.05667	4.47914	0.99753	3.22
159	1992-10-01	2.04	2.69511	3.00041	1.76	4.25662	0.967109	3.1
160	1992-11-01	2.01	2.67101	3.56444	1.86667	4.38132	0.958032	3.09
161	1992-12-01	2.11	2.59332	4.05936	1.87333	4.48102	1.00741	2.92
162	1993-01-01	2.28	2.7045	5.09622	1.78	4.42749	0.900694	3.02
163	1993-02-01	2.36	2.5983	4.81262	1.58333	4.44673	0.879607	3.03
164	1993-03-01	2.12	2.56048	3.80318	1.48667	4.44991	0.932082	3.07
165	1993-04-01	2.09	2.55508	3.38035	1.59	4.51334	0.919047	2.96
166	1993-05-01	2.05	2.73719	2.6827	1.59667	4.66103	0.920899	3
167	1993-06-01	2.27	2.59048	2.84065	1.50333	4.73661	0.926445	3.04
168	1993-07-01	2.1	2.41529	2.2385	1.41	4.58058	0.898261	3.06
169	1993-08-01	2.15	2.45367	2.63359	1.31333	4.63277	0.875287	3.03
170	1993-09-01	1.94	2.39328	2.88421	1.21667	4.71137	0.930708	3.09
171	1993-10-01	1.88	2.35381	2.90057	1.32	4.64517	0.921377	2.99
172	1993-11-01	1.83	2.34624	2.89406	1.12333	5.02664	0.620437	3.02
173	1993-12-01	1.86	2.19191	3.35723	1.02667	4.87673	0.910092	2.96
174	1994-01-01	1.95	1.97643	3.29783	1.13	4.73118	0.923787	3.05
175	1994-02-01	1.61	2.06004	2.87872	1.13667	4.7529	0.949564	3.25
176	1994-03-01	1.36	2.13196	4.0591	1.04333	4.78708	0.874071	3.34
177	1994-04-01	1.46	1.98175	4.28956	0.95	4.77521	0.887858	3.56
178	1994-05-01	1.45	1.81403	5.18449	0.653333	4.76353	0.832823	4.01
179	1994-06-01	1.31	2.02733	5.67853	0.656667	4.84045	0.839509	4.25
180	1994-07-01	1.68	2.18686	5.51664	0.66	4.80741	0.841412	4.26
181	1994-08-01	1.55	2.2455	6.25612	0.563333	4.79553	0.839831	4.47
182	1994-09-01	1.36	2.2533	6.15309	0.466667	4.76469	0.844811	4.73
183	1994-10-01	1.39	2.10467	6.23628	0.37	4.81052	0.851082	4.76
184	1994-11-01	1.41	2.10646	6.44923	0.173333	4.89696	0.860773	5.29
185	1994-12-01	1.26	2.14922	6.98262	0.0766667	4.94292	0.919624	5.45
186	1995-01-01	1.48	2.32143	6.77296	0.18	4.79018	0.830277	5.53
187	1995-02-01	1.63	2.26574	6.58672	-0.0166667	4.87544	0.883781	5.92
188	1995-03-01	1.5	2.17204	5.66007	-0.0133333	4.90053	0.836181	5.98
189	1995-04-01	1.53	2.32129	4.99317	0.39	5.01897	0.872296	6.05
190	1995-05-01	1.9	2.3308	4.81589	0.193333	4.95449	0.841187	6.01
191	1995-06-01	1.69	2.18105	4.50451	0.196667	4.91532	0.814701	6
192	1995-07-01	1.59	1.98649	3.93077	0.3	4.82958	0.86085	5.85
193	1995-08-01	1.91	1.97344	4.62034	0.303333	4.86741	0.8184	5.74
194	1995-09-01	1.76	1.92872	4.64109	0.206667	4.85668	0.809824	5.8
195	1995-10-01	1.72	2.02167	3.63305	0.11	4.87846	0.823943	5.76
196	1995-11-01	1.92	1.82437	3.24488	0.213333	4.90085	0.801051	5.8
197	1995-12-01	1.91	1.95301	2.57579	0.216667	4.95821	0.82698	5.6
198	1996-01-01	1.87	1.97443	1.72439	0.22	4.75119	0.801435	5.56
199	1996-02-01	1.5	1.95406	3.45391	0.123333	4.87922	0.782186	5.22
200	1996-03-01	1.69	2.07395	3.20739	0.126667	4.86625	0.798018	5.31
201	1996-04-01	1.53	2.11048	4.22476	0.23	4.95772	0.815919	5.22
202	1996-05-01	1.45	2.12959	4.6313	0.233333	4.80877	0.799022	5.24
203	1996-06-01	1.67	2.02839	5.15587	-0.0633333	4.79595	0.764678	5.27
204	1996-07-01	1.55	2.1179	5.43419	0.14	4.75405	0.769248	5.4
205	1996-08-01	1.22	1.99368	4.71859	-0.256667	4.85108	0.776517	5.22
206	1996-09-01	1.63	2.212	5.02005	-0.153333	4.85543	0.759953	5.3
207	1996-10-01	1.7	2.25618	5.09294	-0.15	4.72987	0.781438	5.24
208	1996-11-01	1.73	2.44068	5.75418	0.0533333	4.81485	0.766696	5.31
209	1996-12-01	1.46	2.36266	6.04	0.0566667	4.93895	0.821114	5.29
210	1997-01-01	1.56	2.26764	6.8832	-0.04	4.88437	0.786813	5.25
211	1997-02-01	1.38	2.32199	6.51119	-0.136667	4.86827	0.745462	5.19
212	1997-03-01	1.26	2.12117	7.35939	-0.133333	4.86744	0.738573	5.39
213	1997-04-01	1.62	1.91609	6.41057	-0.23	4.96031	0.764769	5.51
214	1997-05-01	1.53	1.6925	6.25278	-0.426667	4.85479	0.728514	5.5
215	1997-06-01	1.51	1.82525	5.87542	-0.323333	4.93529	0.721434	5.56
216	1997-07-01	1.73	1.66983	6.81323	-0.42	4.8478	0.726789	5.52
217	1997-08-01	1.48	1.65598	7.3131	-0.516667	4.90986	0.711006	5.54
218	1997-09-01	1.58	1.61459	7.5292	-0.413333	4.86172	0.696116	5.54
219	1997-10-01	1.73	1.43884	8.52266	-0.61	4.78477	0.711706	5.5
220	1997-11-01	1.56	1.26301	8.52359	-0.706667	4.94983	0.692788	5.52
221	1997-12-01	1.57	1.12499	8.14282	-0.603333	4.98318	0.748415	5.5
222	1998-01-01	1.66	1.04386	8.55871	-0.7	4.98089	0.727984	5.56
223	1998-02-01	1.63	0.78024	7.39525	-0.696667	4.96121	0.693123	5.51
224	1998-03-01	1.65	0.69057	6.73824	-0.593333	4.92421	0.679397	5.49
225	1998-04-01	1.65	0.71545	7.09602	-0.99	5.24834	0.74098	5.45
226	1998-05-01	1.74	0.90146	7.16218	-0.89	4.94426	0.691023	5.49
227	1998-06-01	1.69	0.68664	5.97245	-0.79	5.01612	0.688187	5.56
228	1998-07-01	1.65	0.87559	4.81762	-0.79	4.96939	0.686277	5.54
229	1998-08-01	2.09	0.93393	5.86427	-0.786667	4.95193	0.709284	5.55
230	1998-09-01	2.65	0.63183	4.72787	-0.683333	4.93277	0.694444	5.51
231	1998-10-01	2.54	0.72192	4.66191	-0.78	4.8594	0.711277	5.07
232	1998-11-01	2.6	0.72322	3.68476	-0.876667	4.92481	0.740309	4.83
233	1998-12-01	2.58	0.84506	3.75081	-0.873333	5.05207	0.816384	4.68
234	1999-01-01	2.63	0.93819	3.69958	-0.97	4.96093	0.747725	4.63
235	1999-02-01	2.1	0.93198	4.11466	-0.866667	5.00112	0.751173	4.76
236	1999-03-01	2.28	0.99199	4.20562	-1.06333	5.08577	0.677382	4.81
237	1999-04-01	2.12	1.3553	4.12466	-0.96	5.05901	0.688557	4.74
238	1999-05-01	2.08	1.28144	4.1694	-1.05667	5.06806	0.655647	4.74
239	1999-06-01	2.21	1.39862	4.6555	-0.953333	5.08518	0.634551	4.76
240	1999-07-01	2.03	1.41781	5.68312	-0.95	5.07481	0.668543	4.99
241	1999-08-01	2.17	1.46105	3.9953	-1.04667	5.08826	0.702944	5.07
242	1999-09-01	2.3	1.88491	3.75892	-1.04333	5.09708	0.736441	5.22
243	1999-10-01	2.36	1.83433	4.29411	-1.14	5.0121	0.821135	5.2
244	1999-11-01	1.97	1.9205	4.86047	-1.13333	5.00099	1.03002	5.42
245	1999-12-01	1.74	2.05516	5.27366	-1.22667	4.83792	1.85633	5.3
246	2000-01-01	1.65	2.18862	4.79626	-1.22	5.0287	0.967199	5.45
247	2000-02-01	1.87	2.56743	4.54756	-1.11667	5.00638	0.8828	5.73
248	2000-03-01	2.34	2.93086	4.7769	-1.21333	4.98421	0.760298	5.85
249	2000-04-01	2.17	2.35028	5.24785	-1.41	4.96643	0.981625	6.02
250	2000-05-01	2.61	2.36982	4.69864	-1.20667	4.97585	0.679035	6.27
251	2000-06-01	2.45	2.68495	4.97527	-1.20333	4.93707	0.793952	6.53
252	2000-07-01	2.31	2.66864	4.16391	-1.2	4.96079	0.750327	6.54
253	2000-08-01	2.53	2.47645	3.41737	-1.09667	4.96131	0.673608	6.5
254	2000-09-01	2.55	2.54854	4.25272	-1.29333	4.93679	0.680601	6.52
255	2000-10-01	2.57	2.51424	2.5805	-1.29	4.8946	0.684006	6.51
256	2000-11-01	2.8	2.56537	2.11014	-1.28667	4.92225	0.794113	6.51
257	2000-12-01	2.9	2.48538	1.06887	-1.28333	4.94353	0.999588	6.4
258	2001-01-01	2.74	2.70148	0.40193	-0.98	4.95097	0.890656	5.98
259	2001-02-01	2.95	2.53933	-0.48437	-0.976667	4.97919	0.880392	5.49
260	2001-03-01	2.91	2.10919	-1.12593	-0.873333	5.00844	0.697094	5.31
261	2001-04-01	2.72	2.37354	-2.12913	-0.77	4.99201	0.719027	4.8
262	2001-05-01	2.64	2.55675	-2.88356	-0.866667	4.97551	0.965473	4.21
263	2001-06-01	2.55	2.39173	-3.55633	-0.663333	5.05325	0.743044	3.97
264	2001-07-01	2.9	2.10193	-3.96284	-0.56	5.06875	0.893764	3.77
265	2001-08-01	3	2.09567	-3.81075	-0.256667	5.07677	0.76952	3.65
266	2001-09-01	3.43	1.3139	-4.54609	-0.153333	5.01097	1.06057	3.07
267	2001-10-01	3.61	1.53207	-4.67361	0.15	5.11387	0.850486	2.49
268	2001-11-01	3.03	1.3217	-5.16738	0.353333	5.20271	0.925948	2.09
269	2001-12-01	2.98	1.06233	-4.88315	0.556667	5.17047	0.994559	1.82
270	2002-01-01	2.8	0.66612	-3.66165	0.56	5.21864	0.878245	1.73
271	2002-02-01	3.01	0.67768	-3.09198	0.563333	5.28791	0.83127	1.74
272	2002-03-01	2.69	0.94338	-2.05291	0.566667	5.32181	0.766725	1.73
273	2002-04-01	2.92	1.18817	-1.36448	0.77	5.35589	0.749214	1.75
274	2002-05-01	3.01	0.98817	-0.34172	0.673333	5.40365	1.00857	1.75
275	2002-06-01	3.09	0.93509	1.2115	0.676667	5.4154	0.86635	1.75
276	2002-07-01	3.39	1.19212	1.54493	0.68	5.45557	0.802578	1.73
277	2002-08-01	3.44	1.40392	1.68196	0.583333	5.51366	0.68293	1.74
278	2002-09-01	3.77	1.93272	2.21734	0.586667	5.50785	0.684383	1.75
279	2002-10-01	3.8	1.75939	2.35488	0.59	5.53113	0.762263	1.75
280	2002-11-01	3.4	1.92975	3.39679	0.793333	5.51001	0.798346	1.34
281	2002-12-01	3.62	2.13244	2.8656	0.896667	5.64674	0.930399	1.24
282	2003-01-01	3.35	2.34482	2.81189	0.7	5.6473	0.748328	1.24
283	2003-02-01	3.35	2.60616	3.15988	0.803333	5.66755	0.766229	1.26
284	2003-03-01	3.12	2.58909	2.10651	0.806667	5.73065	0.752247	1.25
285	2003-04-01	2.96	1.98934	0.97633	0.91	5.74842	0.879424	1.26
286	2003-05-01	3.01	1.80676	0.57623	1.01333	5.7727	0.834048	1.26
287	2003-06-01	2.65	1.78837	-0.20963	1.21667	5.7173	0.806963	1.22
288	2003-07-01	2.13	1.86239	0.46091	1.12	5.69516	0.76277	1.01
289	2003-08-01	2.56	2.00571	0.31021	1.02333	5.6494	0.751609	1.03
290	2003-09-01	2.83	2.1414	0.76029	1.02667	5.62216	0.730203	1.01
291	2003-10-01	2.4	1.96894	1.21261	0.93	5.6314	0.757497	1.01
292	2003-11-01	2.32	1.99648	1.47298	0.733333	5.63976	0.784618	1
293	2003-12-01	2.33	2.12353	1.88371	0.636667	5.63598	0.886705	0.98
294	2004-01-01	2.28	2.21273	1.56104	0.64	5.65056	0.747289	1
295	2004-02-01	2.28	1.99978	1.84337	0.543333	5.63196	0.663723	1.01
296	2004-03-01	2.25	1.89616	1.56964	0.746667	5.60252	0.7201	1
297	2004-04-01	1.93	2.25877	2.74287	0.55	5.62135	0.802367	1
298	2004-05-01	2.09	2.70778	3.5392	0.553333	5.59276	0.743433	1
299	2004-06-01	2.16	2.89129	2.5201	0.556667	5.66936	0.760326	1.03
300	2004-07-01	2.12	2.68481	2.86148	0.46	5.64966	0.653144	1.26
301	2004-08-01	2.33	2.39245	3.09519	0.363333	5.64936	0.65529	1.43
302	2004-09-01	2.13	2.27273	2.57767	0.366667	5.66523	0.711283	1.61
303	2004-10-01	2.16	2.69967	3.3984	0.47	5.66926	0.678694	1.76
304	2004-11-01	1.84	2.96503	2.82682	0.373333	5.68795	0.786223	1.93
305	2004-12-01	1.91	2.79375	3.65339	0.376667	5.70114	0.739681	2.16
306	2005-01-01	1.88	2.53262	3.8682	0.28	5.63217	0.701719	2.28
307	2005-02-01	1.46	2.59896	3.9462	0.383333	5.63211	0.680532	2.5
308	2005-03-01	1.56	2.74774	4.31621	0.186667	5.60864	0.703604	2.63
309	2005-04-01	1.84	2.8439	4.00504	0.19	5.59464	0.709678	2.79
310	2005-05-01	2.01	2.56989	3.32153	0.0933333	5.61593	0.677088	3
311	2005-06-01	1.92	2.33993	4.58064	-0.00333333	5.58007	0.646069	3.04
312	2005-07-01	1.67	2.67968	3.4626	0	5.53695	0.684243	3.26
313	2005-08-01	1.94	3.04012	3.66598	-0.1	5.5536	0.706058	3.5
314	2005-09-01	1.69	3.83077	1.6458	0	5.58117	0.664881	3.62
315	2005-10-01	1.73	3.55116	1.95851	0	5.5829	0.600631	3.78
316	2005-11-01	1.9	2.93935	2.77349	0.00333333	5.59289	0.683102	4
317	2005-12-01	1.93	2.88395	2.6619	-0.0933333	5.53531	0.769742	4.16
318	2006-01-01	1.71	3.24706	2.30113	-0.29	5.51757	0.608324	4.29
319	2006-02-01	1.72	3.0225	1.62998	-0.19	5.54512	0.648468	4.49
320	2006-03-01	1.55	2.91357	1.9721	-0.29	5.53294	0.548137	4.59
321	2006-04-01	1.61	3.10237	2.23255	-0.29	5.54943	0.620108	4.79
322	2006-05-01	1.63	3.32176	1.99112	-0.386667	5.53329	0.647155	4.94
323	2006-06-01	1.63	3.51295	1.99112	-0.383333	5.56075	0.566611	4.99
324	2006-07-01	1.77	3.42781	2.27111	-0.28	5.54754	0.557022	5.24
325	2006-08-01	1.85	3.33601	2.38711	-0.276667	5.52421	0.606552	5.25
326	2006-09-01	1.79	2.08113	4.11695	-0.473333	5.51701	0.581581	5.25
327	2006-10-01	1.81	1.67724	2.76565	-0.57	5.50091	0.60295	5.25
328	2006-11-01	1.74	1.92408	1.62028	-0.463333	5.49607	0.597979	5.25
329	2006-12-01	1.51	2.28684	2.06071	-0.556667	5.53019	0.646424	5.24
330	2007-01-01	1.51	2.13322	1.41277	-0.35	5.51166	0.614718	5.25
331	2007-02-01	1.72	2.38868	2.44192	-0.443333	5.4681	0.676628	5.26
332	2007-03-01	1.62	2.56581	2.4483	-0.536667	5.49324	0.625467	5.26
333	2007-04-01	1.76	2.33149	2.76972	-0.43	5.4882	0.645191	5.25
334	2007-05-01	1.49	2.35323	2.91573	-0.526667	5.49534	0.603079	5.25
335	2007-06-01	1.67	2.31726	2.5421	-0.323333	5.48044	0.51725	5.25
336	2007-07-01	1.87	2.12444	2.53518	-0.22	5.49344	0.508386	5.26
337	2007-08-01	2.11	1.87347	2.35295	-0.313333	5.38484	0.605549	5.02
338	2007-09-01	2	2.53418	2.9666	-0.206667	5.32537	0.753191	4.94
339	2007-10-01	2	3.08932	2.59775	-0.2	5.32844	0.709461	4.76
340	2007-11-01	2.43	3.59924	3.2857	-0.196667	5.30845	0.678959	4.49
341	2007-12-01	2.61	3.47197	2.25865	0.106667	5.12434	0.923873	4.24
342	2008-01-01	2.87	3.3884	2.51875	0.11	4.86893	1.23282	3.94
343	2008-02-01	3.29	3.27298	1.12937	-0.00666667	4.89638	1.23872	2.98
344	2008-03-01	3.44	3.19059	0.68412	0.176667	4.18529	1.92523	2.61
345	2008-04-01	3.2	3.1403	-0.79338	0.06	3.73292	2.30931	2.28
346	2008-05-01	2.87	3.28228	-1.3936	0.453333	3.3308	2.8009	1.98
347	2008-06-01	3.08	3.81178	-1.65521	0.646667	3.19748	2.76421	2
348	2008-07-01	3.17	4.1354	-2.13142	0.84	3.21516	2.94821	2.01
349	2008-08-01	3.32	3.98108	-3.83602	1.10333	3.2281	2.89628	2
350	2008-09-01	3.46	3.66714	-8.36254	1.06667	3.23266	4.98723	1.81
351	2008-10-01	4.87	2.67195	-7.09753	1.43	3.25524	10.1976	0.97
352	2008-11-01	6.28	0.92617	-8.78269	1.69333	3.25122	11.1219	0.39
353	2008-12-01	6.18	0.12893	-11.4862	2.15667	3.30766	12.2566	0.16
354	2009-01-01	5.27	-0.11146	-13.362	2.62	3.28937	10.052	0.15
355	2009-02-01	5.06	-0.13156	-13.6336	3.09667	3.29557	10.0085	0.22
356	2009-03-01	5.71	-0.52581	-14.7946	3.47333	3.31137	11.1378	0.18
357	2009-04-01	5.23	-0.56742	-14.8321	3.75	3.83186	10.592	0.15
358	2009-05-01	4.59	-0.88936	-15.208	4.11333	4.18212	10.3133	0.18
359	2009-06-01	3.97	-1.01872	-15.3319	4.17667	4.5424	9.54371	0.21
360	2009-07-01	3.57	-1.46654	-13.9455	4.14	4.84928	9.09409	0.16
361	2009-08-01	3.18	-1.10079	-11.6128	4.2	5.15344	9.20178	0.16
362	2009-09-01	3	-1.02236	-6.91099	4.36	5.31949	9.48774	0.15
363	2009-10-01	2.88	0.01265	-7.4974	4.52	5.27957	9.45392	0.12
364	2009-11-01	3.11	1.45973	-5.93794	4.37333	5.3033	9.76491	0.12
365	2009-12-01	2.52	2.09031	-2.82117	4.32667	5.32979	10.0028	0.12
366	2010-01-01	2.62	2.30143	0.71589	4.18	5.29334	10.0212	0.11
367	2010-02-01	2.73	2.11633	1.73578	4.16667	5.28563	10.275	0.13
368	2010-03-01	2.43	2.37276	4.04669	4.25333	5.24775	10.3403	0.16
369	2010-04-01	2.56	2.28156	5.28235	4.24	5.2134	10.429	0.2
370	2010-05-01	2.74	2.20753	7.88374	3.93	5.21425	10.4514	0.2
371	2010-06-01	3.26	1.56189	8.4559	3.72	5.18659	10.3724	0.18
372	2010-07-01	3.07	1.63826	7.73329	3.71	5.16057	10.2829	0.18
373	2010-08-01	3.19	1.483	6.87216	3.79667	5.21266	10.0766	0.19
374	2010-09-01	3.13	1.41921	6.30174	3.78333	5.36356	9.82634	0.19
375	2010-10-01	3.09	1.35798	5.6767	3.67	5.50437	9.57556	0.19
376	2010-11-01	3.11	1.30727	5.2972	4.06	5.93152	9.50874	0.19
377	2010-12-01	2.8	1.47677	5.97288	3.55	6.63816	9.17535	0.18
378	2011-01-01	2.67	1.55955	4.63697	3.34	7.33859	8.75192	0.17
379	2011-02-01	2.73	1.84593	3.81209	3.23333	7.97246	8.67134	0.16
380	2011-03-01	2.56	2.11144	4.16228	3.22667	8.63008	8.34293	0.14
381	2011-04-01	2.7	2.48712	3.41276	3.32	9.10429	8.22863	0.1
382	2011-05-01	2.73	2.76679	2.15899	3.21667	9.79859	8.09818	0.09
383	2011-06-01	2.57	2.78889	2.28419	3.31333	10.4612	8.07487	0.09
384	2011-07-01	2.94	2.8754	2.38844	3.21	10.5275	7.87501	0.07
385	2011-08-01	3.13	2.97592	2.65066	3.20667	10.5508	7.6748	0.1
386	2011-09-01	3.35	3.01889	2.37357	3.20333	10.701	7.62576	0.08
387	2011-10-01	3.2	2.69413	3.3586	3	10.6122	7.38465	0.07
388	2011-11-01	3.06	2.70018	3.25308	2.81	10.5894	7.23379	0.08
389	2011-12-01	3.36	2.52628	2.84899	2.72	10.5913	7.94302	0.07
390	2012-01-01	3.4	2.56932	3.57623	2.53	10.4572	7.9176	0.08
391	2012-02-01	3.16	2.51274	4.32352	2.54333	10.2827	7.8229	0.1
392	2012-03-01	3	2.2965	2.79303	2.45667	10.3984	7.57737	0.13
393	2012-04-01	3.24	1.99984	3.93707	2.47	10.3401	7.43249	0.14
394	2012-05-01	3.48	1.57628	3.90399	2.49333	10.2499	7.33769	0.16
395	2012-06-01	3.35	1.54605	3.58105	2.51667	10.3096	7.40508	0.16
396	2012-07-01	3.36	1.41023	3.30923	2.54	10.1552	7.35047	0.16
397	2012-08-01	3.34	1.51242	2.29296	2.46	10.1151	7.23981	0.13
398	2012-09-01	3.19	1.67742	2.33698	2.18	10.1116	7.09145	0.14
399	2012-10-01	2.86	1.97721	1.85781	2.2	10.1118	7.23847	0.16
400	2012-11-01	2.89	1.69922	2.42028	2.14667	10.0738	7.37022	0.16
401	2012-12-01	2.85	1.62552	2.18366	2.39333	10.0668	7.59668	0.16
402	2013-01-01	2.71	1.47398	1.52032	2.54	10.2949	7.81815	0.14
403	2013-02-01	2.96	1.61836	1.78856	2.29	10.5902	8.11753	0.15
404	2013-03-01	2.98	1.29142	2.68174	2.14	10.8246	8.49214	0.14
405	2013-04-01	2.89	1.07945	1.77917	2.29	11.0666	8.93424	0.15
406	2013-05-01	2.57	1.2591	1.65452	2.22667	11.3575	9.05419	0.11
407	2013-06-01	2.67	1.52852	1.89989	2.26333	11.5219	9.26247	0.09
408	2013-07-01	2.72	1.61821	1.12805	2.1	11.8112	9.46956	0.09
409	2013-08-01	2.64	1.43392	2.27439	2.03667	11.993	9.606	0.08
410	2013-09-01	2.83	1.16658	2.78594	2.07333	12.2093	9.90014	0.08
411	2013-10-01	2.74	1.03797	2.42171	2.11	12.4591	10.1523	0.09
412	2013-11-01	2.63	1.2643	2.23884	1.84667	12.636	10.2914	0.08
413	2013-12-01	2.34	1.48221	2.22736	1.68333	12.8955	10.6473	0.09
414	2014-01-01	2.52	1.47936	1.8115	1.62	13.1769	10.92	0.07
415	2014-02-01	2.44	1.16849	2.14451	1.75	13.3142	10.9968	0.07
416	2014-03-01	2.33	1.50461	2.72121	1.78	13.4597	11.1533	0.08
417	2014-04-01	2.23	1.78119	2.99651	1.31	13.5745	11.2383	0.09
418	2014-05-01	2.28	1.88991	3.2485	1.43333	13.6012	11.1985	0.09
419	2014-06-01	2.27	1.78508	3.39367	1.25667	13.671	11.2437	0.1
420	2014-07-01	2.15	1.81147	4.05625	1.38	13.7122	11.2537	0.09
421	2014-08-01	2.34	1.6422	3.23354	1.3	13.7022	11.1252	0.09
422	2014-09-01	2.28	1.62777	3.03222	1.12	13.8097	11.3383	0.09
423	2014-10-01	2.34	1.43037	3.19044	0.94	13.8056	11.358	0.09
424	2014-11-01	2.61	1.19453	3.69474	1.05333	13.7902	11.3401	0.09
425	2014-12-01	2.57	0.83853	3.22608	0.866667	13.8013	11.4179	0.12
426	2015-01-01	2.77	0.18284	3.08835	0.98	13.7592	11.4022	0.11
427	2015-02-01	2.51	0.28924	1.75451	0.79	13.643	11.2384	0.11
428	2015-03-01	2.6	0.28086	0.47452	0.7	13.6694	11.2312	0.11
429	2015-04-01	2.43	0.16352	-0.17366	0.71	13.5418	11.0725	0.12
430	2015-05-01	2.77	0.23028	-0.94196	0.92	13.5188	11.0064	0.12
431	2015-06-01	2.78	0.31154	-1.63108	0.63	13.4505	11.1179	0.13
432	2015-07-01	3	0.24324	-1.24724	0.54	13.4591	11.0668	0.13
433	2015-08-01	2.98	0.25684	-1.27788	0.446667	13.4417	10.9921	0.14
434	2015-09-01	3.28	0.08333	-1.94979	0.353333	13.3879	10.9964	0.14
435	2015-10-01	3.18	0.09401	-2.32339	0.36	13.3882	11.0266	0.12
436	2015-11-01	3.25	0.23182	-3.68516	0.463333	13.4338	10.999	0.12
437	2015-12-01	3.19	0.30406	-3.97509	0.366667	13.4136	11.0349	0.24
438	2016-01-01	3.51	0.82077	-2.68783	0.27	13.4064	11.008	0.34
439	2016-02-01	3.6	0.5924	-2.91825	0.273333	13.4322	11.0711	0.38
440	2016-03-01	3.35	0.63211	-3.37258	0.376667	13.2723	10.9007	0.36
441	2016-04-01	2.96	0.88718	-2.68983	0.38	13.2101	10.8048	0.37
442	2016-05-01	2.84	0.79588	-2.37	0.18	13.2293	10.7456	0.37
443	2016-06-01	3.04	0.79241	-1.67954	0.28	13.1802	10.7279	0.38
444	2016-07-01	2.76	0.75115	-2.01527	0.18	13.1894	10.7204	0.39
445	2016-08-01	2.66	0.90099	-1.98441	0.28	13.0901	10.5961	0.4
446	2016-09-01	2.71	1.22569	-1.73309	0.38	13.03	10.518	0.4
447	2016-10-01	2.54	1.46407	-1.25894	0.28	13.0677	10.56	0.4
448	2016-11-01	2.34	1.44092	-0.87898	0.08	12.9553	10.424	0.41
449	2016-12-01	2.38	1.70842	0.5066	0.08	12.9205	10.4254	0.54
450	2017-01-01	2.21	2.03667	-0.47762	0.08	12.9044	10.421	0.65
451	2017-02-01	2.28	2.18903	-0.18125	0.0766667	12.8759	10.481	0.66
452	2017-03-01	2.28	1.90083	1.16415	-0.226667	12.7916	10.4088	0.79
453	2017-04-01	2.28	1.83871	1.93311	-0.23	12.8279	10.4374	0.9
454	2017-05-01	2.34	1.65998	2.07773	-0.226667	12.7155	10.2935	0.91
455	2017-06-01	2.06	1.57715	1.78857	-0.323333	12.6541	10.2581	1.04
456	2017-07-01	2.09	1.56019	1.4461	-0.32	12.6566	10.2689	1.15
457	2017-08-01	2.19	1.62876	1.10733	-0.22	12.5818	10.141	1.16
458	2017-09-01	1.97	1.87939	1.22201	-0.42	12.5195	10.1065	1.15
459	2017-10-01	1.94	1.81895	2.65443	-0.52	12.5084	10.1224	1.15
460	2017-11-01	1.85	1.95944	3.40275	-0.42	12.3673	9.97467	1.16
461	2017-12-01	1.82	1.8835	2.90122	-0.52	12.3227	10.0142	1.3
462	2018-01-01	1.54	1.84423	2.82604	-0.52	12.1878	9.92059	1.41
463	2018-02-01	1.64	1.96394	3.67981	-0.52	12.0899	9.82039	1.42
464	2018-03-01	1.9	2.17738	3.62643	-0.62	12.0746	9.79615	1.51
465	2018-04-01	1.72	2.15261	3.80621	-0.72	11.8999	9.66336	1.69
466	2018-05-01	2	2.36512	2.95626	-0.82	11.6686	9.48509	1.7
467	2018-06-01	1.98	2.38428	3.53981	-0.62	11.6017	9.40158	1.82
468	2018-07-01	1.83	2.44038	4.12486	-0.72	11.4355	9.29314	1.91
469	2018-08-01	1.91	2.2786	5.42174	-0.816667	11.2634	9.17861	1.91
470	2018-09-01	1.83	2.06534	5.58289	-0.913333	11.1869	9.09044	1.95
471	2018-10-01	1.92	2.11356	4.18462	-0.81	10.9273	8.99695	2.19
Histories
		1.91476	1.86394	4.80389	-0.475	4.9271	0.792548	5.43869
		2.47738	2.44688	1.30165	0.326667	5.27526	1.28432	2.7525
		2.99667	1.28673	0.633389	2.49536	9.80565	9.56888	0.129405
		2.30206	1.63912	1.05015	-0.215	12.5307	10.1787	1.00794
Average Inflation
Dec2007-Oct2007		1.48954
Dec2007-Oct2018		1.54873

## Sheet: LagSelection
LAG SELECTION - ALL RESULTS
No. of lags	Log lik	Nvars	Nstates	Npara	Depnobs	AIC	HIC	SIC	aic	hq	bic
1	0.885978	7	4	340	464	-0.306439	0.887674	2.7271	1.4617	2.65581	4.49523
2	1.2599	7	4	536	457	-0.174075	1.73143	4.66363	2.34022	4.24572	7.17792
3	2.3169	7	4	732	450	-1.38046	1.2541	5.30392	3.24304	5.8776	9.92741
4	1.02333	7	4	928	443	2.14296	5.52496	10.7182	4.185	7.567	12.7602
5	3.25936	7	4	1124	436	-1.36276	2.78581	9.14933	5.14101	9.28959	15.6531
6	1.40928	7	4	1320	429	3.33528	8.27036	15.8321	6.14728	11.0824	18.6441
7	0.635002	7	4	1516	422	5.91483	11.6572	20.4462	7.18182	12.9242	21.7132
8	-0.535746	7	4	1712	415	9.32209	15.8934	25.94	8.25318	14.8245	24.871
9	-0.93713	7	4	1908	408	11.2272	18.65	29.9858	9.35753	16.7804	28.1161
10	0.693928	7	4	2104	401	9.10591	17.4039	30.0618	10.4903	18.7883	31.4462
11	0.56404	7	4	2300	394	10.547	19.7448	33.7592	11.6723	20.87	34.8845
12	0.9236	7	4	2496	387	11.052	21.1754	36.5823	12.8945	23.0178	38.4248
LAG - SELECTION TABLE FOR PAPER
No. of lags	Log lik	AIC	HIC	SIC	AIC*	HIC*	SIC*
1	0.885978	-0.306439	0.887674	2.7271	1.4617	2.65581	4.49523
2	1.2599	-0.174075	1.73143	4.66363	2.34022	4.24572	7.17792
3	2.3169	-1.38046	1.2541	5.30392	3.24304	5.8776	9.92741
4	1.02333	2.14296	5.52496	10.7182	4.185	7.567	12.7602
5	3.25936	-1.36276	2.78581	9.14933	5.14101	9.28959	15.6531
6	1.40928	3.33528	8.27036	15.8321	6.14728	11.0824	18.6441
7	0.635002	5.91483	11.6572	20.4462	7.18182	12.9242	21.7132
8	-0.535746	9.32209	15.8934	25.94	8.25318	14.8245	24.871
9	-0.93713	11.2272	18.65	29.9858	9.35753	16.7804	28.1161
10	0.693928	9.10591	17.4039	30.0618	10.4903	18.7883	31.4462
11	0.56404	10.547	19.7448	33.7592	11.6723	20.87	34.8845
12	0.9236	11.052	21.1754	36.5823	12.8945	23.0178	38.4248

## Sheet: ModelComparison
MODEL COMPARISONS - ALL RESULTS
	log like	Npara	AIC	HIC	SIC
VSTAR	0.885978	340	-0.306439	0.887674	2.7271
VSTARC	0.751355	338	-0.0458125	1.14128	2.96988
VSTARP	0.629694	304	0.0509568	1.11863	2.76329
VSTARV	0.113448	170	0.505862	1.10292	2.02263
VSTARM	-18.6952	226	38.3644	39.1582	40.3809
VAR	-19.4023	56	39.0459	39.2426	39.5455
T	464
	chi2inv(0.95,NoR)
	log like	Npara	AIC	HIC	SIC
VSTAR	0.885978	340	-0.306439	0.887674	2.7271
VSTARC	0.751355	338	-0.0458125	1.14128	2.96988
VSTARP	0.629694	304	0.0509568	1.11863	2.76329
VSTARV	0.113448	170	0.505862	1.10292	2.02263
VSTARM	-18.6952	226	38.3644	39.1582	40.3809
VAR	-19.4023	56	39.0459	39.2426	39.5455

## Sheet: ModelSimulationCheck
No	observation_date	y1	y2	y3	y4	y5	y6	y7
1	1979-08-01	1.11	9.27066	1.41123	-0.226667	4.20751	1.58223	10.94
2	1979-09-01	1.1	9.61083	1.26343	-0.323333	4.20877	1.55687	11.43
3	1979-10-01	0.68	9.63252	1.01531	-0.22	4.20191	1.50524	13.77
4	1979-11-01	1.61	9.76874	0.16667	-0.32	4.23323	1.58857	13.18
5	1979-12-01	1.73	10.1769	-0.23919	-0.22	4.07738	1.62823	13.78
6	1980-01-01	1.29	10.4974	0.86457	0.08	4.0317	1.44212	13.82
7	1980-02-01	0.85	11.1021	0.32775	0.0833333	4.02174	1.52836	14.13
8	1980-03-01	1.81	11.5937	-0.31553	0.0866667	4.21597	1.50556	17.19
9	1980-04-01	3.43	11.0207	-1.24247	0.69	4.24777	1.58478	17.61
10	1980-05-01	2.92	10.7363	-4.40755	1.29333	4.30235	1.66798	10.98
11	1980-06-01	2.62	10.5245	-5.59365	1.39667	4.22455	1.41703	9.47
12	1980-07-01	1.89	10.5384	-6.20079	1.6	4.18616	1.47104	9.03
13	1980-08-01	1.6	10.6125	-5.23076	1.5	4.09345	1.45128	9.61
14	1980-09-01	1.84	10.6593	-3.80193	1.3	4.10235	1.47903	10.87
15	1980-10-01	1.77	10.6464	-3.11449	1.3	4.0366	1.46743	12.81
16	1980-11-01	1.92	10.7779	-1.34521	1.30333	3.93041	1.53821	15.85
17	1980-12-01	2.71	10.5671	-0.92675	1.00667	3.87587	1.59994	18.9
18	1981-01-01	2.35	10.4728	-1.93133	1.31	3.68535	1.37475	19.08
19	1981-02-01	1.94	10.3932	-2.40338	1.21333	3.71765	1.50348	15.93
20	1981-03-01	2.21	9.81436	-1.55171	1.21667	3.7635	1.49596	14.7
21	1981-04-01	1.45	9.72126	0.05552	1.02	3.7956	1.84077	15.72
22	1981-05-01	2.45	9.36379	3.16024	1.32333	3.66775	1.46672	18.52
23	1981-06-01	1.94	9.10977	4.95435	1.32667	3.69774	1.44397	19.1
24	1981-07-01	1.5	8.92334	6.46854	1.03	3.70707	1.44059	19.04
25	1981-08-01	0.93	8.69826	6.07431	1.23333	3.75929	1.29007	17.82
26	1981-09-01	1.08	8.35436	3.77156	1.43667	3.7974	1.37865	15.87
27	1981-10-01	2.48	7.97856	1.77394	1.74	3.70319	1.36707	15.08
28	1981-11-01	3.26	7.68222	-1.09751	2.14333	3.85766	1.36892	13.31
29	1981-12-01	2.57	7.31855	-2.72876	2.34667	3.90633	1.53317	12.37
30	1982-01-01	2.96	6.9285	-4.11883	2.45	3.86467	1.48578	13.22
31	1982-02-01	3.15	6.17456	-1.76612	2.75333	3.83328	1.29357	14.78
32	1982-03-01	2.64	5.71267	-3.02928	2.85667	3.74287	1.38839	14.68
33	1982-04-01	2.91	5.3065	-3.45824	3.16	3.84655	1.57453	14.94
34	1982-05-01	2.93	5.45573	-4.64393	3.26333	3.85129	1.23134	14.45
35	1982-06-01	2.48	5.80102	-5.41047	3.46667	3.78569	1.32458	14.15
36	1982-07-01	3.12	5.78843	-6.31815	3.67	3.94894	1.27679	12.59
37	1982-08-01	3.51	5.45856	-7.12695	3.67333	3.98822	1.28561	10.12
38	1982-09-01	3.9	5.11379	-6.86257	3.97667	3.84326	1.2802	10.31
39	1982-10-01	4.02	5.22852	-7.06752	4.28	3.89718	1.29926	9.71
40	1982-11-01	3.51	4.97868	-6.36239	4.68333	3.92945	1.29801	9.2
41	1982-12-01	3.78	4.81374	-6.01547	4.68667	3.90751	1.53221	8.95
42	1983-01-01	3.14	4.68184	-2.25194	4.29	3.83257	1.34888	8.68
43	1983-02-01	3.68	4.54536	-4.74175	4.29333	3.81824	1.4765	8.51
44	1983-03-01	2.99	4.41148	-3.23116	4.19667	3.79998	1.2794	8.77
45	1983-04-01	3.02	4.83342	-1.17105	4.1	3.83855	1.45318	8.8
46	1983-05-01	2.28	4.51322	0.14042	4.00333	3.89283	1.20391	8.63
47	1983-06-01	2.41	4.14658	1.07867	4.00667	3.85305	1.21602	8.98
48	1983-07-01	1.63	4.11587	2.93359	3.31	3.88975	1.15635	9.37
49	1983-08-01	1.66	4.23931	4.99777	3.41	3.87251	1.25906	9.56
50	1983-09-01	2.11	4.3133	6.91502	3.11	3.86202	1.28846	9.45
51	1983-10-01	1.72	3.9089	8.77257	2.71	3.88099	1.14046	9.48
52	1983-11-01	1.98	3.74391	9.59167	2.41333	3.89927	1.12877	9.34
53	1983-12-01	1.93	3.64517	10.9685	2.21667	3.9421	1.20715	9.47
54	1984-01-01	1.98	3.61173	11.0274	1.92	3.83053	1.23545	9.56
55	1984-02-01	1.55	4.13189	12.218	1.72333	3.57307	1.15153	9.59
56	1984-03-01	1.46	4.34006	11.8525	1.72667	3.66396	1.07602	9.91
57	1984-04-01	1.49	4.2611	11.212	1.63	3.86116	1.32943	10.29
58	1984-05-01	0.83	4.09619	10.9652	1.33333	3.80958	1.15365	10.32
59	1984-06-01	1.21	3.89418	10.6912	1.13667	3.76677	1.09111	11.06
60	1984-07-01	2.24	3.68262	9.38331	1.44	3.67673	1.15076	11.23
61	1984-08-01	1.84	3.55628	8.27357	1.44333	3.63043	1.15016	11.64
62	1984-09-01	1.88	3.33761	6.46436	1.24667	3.71882	1.18688	11.3
63	1984-10-01	2.15	3.40386	5.42357	1.35	3.57281	1.18675	9.99
64	1984-11-01	1.9	3.4031	5.45794	1.15333	3.71703	1.15028	9.43
65	1984-12-01	1.85	3.63673	5.04116	1.25667	3.84322	1.07762	8.38
66	1985-01-01	2.09	3.70444	2.81881	1.26	3.67404	1.08828	8.35
67	1985-02-01	1.32	3.49021	2.73151	1.16333	3.65735	1.06455	8.5
68	1985-03-01	2.04	3.55351	2.39272	1.16667	3.72472	1.0193	8.58
69	1985-04-01	2.1	3.31269	1.46468	1.27	3.88176	1.07961	8.27
70	1985-05-01	2.87	3.42796	1.14912	1.17333	3.80796	1.06762	7.97
71	1985-06-01	2.15	3.52348	0.86285	1.37667	3.81718	1.00683	7.53
72	1985-07-01	1.86	3.40772	-0.10876	1.38	3.80906	1.0939	7.88
73	1985-08-01	2.22	3.43221	0.21021	1.08333	3.81159	1.04124	7.9
74	1985-09-01	2.17	3.46633	0.82075	1.08667	3.8599	1.13363	7.92
75	1985-10-01	2.35	3.39432	0.56898	1.09	3.64308	1.04617	7.99
76	1985-11-01	2.4	3.54991	0.51137	0.993333	3.75981	1.07454	8.05
77	1985-12-01	2.58	3.60733	1.4503	0.996667	3.96133	1.14868	8.27
78	1986-01-01	2.36	3.56445	2.09258	0.7	3.95171	1.12949	8.14
79	1986-02-01	2.98	3.08637	1.05582	1.20333	3.89061	1.02883	7.86
80	1986-03-01	3.11	2.46062	0.20949	1.20667	3.84058	1.1228	7.48
81	1986-04-01	2.81	2.10033	0.52211	1.11	3.83496	1.30828	6.99
82	1986-05-01	2.24	2.04615	0.59004	1.21667	3.97491	1.14833	6.85
83	1986-06-01	2.99	2.14822	0.18727	1.22333	3.9655	1.03159	6.92
84	1986-07-01	2.82	1.92453	1.40189	1.03	3.9956	1.04929	6.56
85	1986-08-01	3.23	1.71547	0.85595	0.933333	4.01302	1.02843	6.17
86	1986-09-01	2.75	1.87559	0.62732	1.03667	4.0131	1.10766	5.89
87	1986-10-01	2.9	1.8893	1.52308	1.04	4.04287	1.0419	5.85
88	1986-11-01	2.92	1.77566	1.65154	0.943333	4.09535	1.08035	6.04
89	1986-12-01	2.74	1.57078	1.43272	0.646667	4.20421	1.4551	6.91
90	1987-01-01	2.54	1.5784	0.65624	0.65	4.2685	1.17999	6.43
91	1987-02-01	2.46	1.93553	2.64481	0.656667	4.00077	1.03462	6.1
92	1987-03-01	2.1	2.42749	3.49974	0.663333	4.07153	0.999674	6.13
93	1987-04-01	1.83	3.02157	4.10109	0.37	4.25683	1.28847	6.37
94	1987-05-01	2.02	3.09393	4.55253	0.373333	4.25995	1.24641	6.85
95	1987-06-01	2.14	3.10282	5.39225	0.276667	4.33704	1.11205	6.73
96	1987-07-01	1.95	3.31264	5.5385	0.18	4.22343	0.975483	6.58
97	1987-08-01	1.8	3.5908	6.55136	0.0866667	4.17827	1.08925	6.73
98	1987-09-01	1.68	3.60118	6.6148	-0.00666667	4.26711	0.995863	7.22
99	1987-10-01	2.74	3.74341	7.65207	0.1	4.22231	1.24241	7.29
100	1987-11-01	2.24	3.75692	7.72447	-0.0966667	4.28511	0.920297	6.69
101	1987-12-01	2.46	3.80673	7.34255	-0.193333	4.32635	1.08619	6.77
102	1988-01-01	2.81	3.72712	7.71747	-0.19	4.31453	0.979073	6.83
103	1988-02-01	2.46	3.51438	6.80042	-0.183333	4.20364	0.870007	6.58
104	1988-03-01	2	3.5993	6.88002	-0.176667	4.17693	0.914049	6.58
105	1988-04-01	2.03	3.7158	6.81665	-0.47	4.29567	0.98745	6.87
106	1988-05-01	1.84	3.75315	5.99437	-0.263333	4.12217	0.921017	7.09
107	1988-06-01	2.18	3.80169	5.76951	-0.456667	4.24627	1.05701	7.51
108	1988-07-01	1.99	4.0666	5.08373	-0.45	4.17819	0.947768	7.75
109	1988-08-01	1.96	3.96509	4.67547	-0.243333	4.18652	0.95454	8.01
110	1988-09-01	2.03	4.12044	4.12367	-0.436667	4.21621	1.07299	8.19
111	1988-10-01	1.76	4.12862	3.13213	-0.43	4.1534	0.948123	8.3
112	1988-11-01	1.42	4.17197	2.75337	-0.523333	4.20657	1.02486	8.35
113	1988-12-01	1.51	4.30536	2.75216	-0.516667	4.26675	1.10384	8.76
114	1989-01-01	1.64	4.43266	3.01275	-0.41	4.22724	1.01413	9.12
115	1989-02-01	1.29	4.62788	2.10559	-0.603333	4.05157	0.997802	9.36
116	1989-03-01	1.37	4.65563	2.11523	-0.796667	4.08559	0.949894	9.85
117	1989-04-01	1.59	4.84356	1.62562	-0.59	4.205	0.999793	9.84
118	1989-05-01	1.86	4.92144	1.05447	-0.583333	3.96332	1.09081	9.81
119	1989-06-01	1.93	4.70542	0.84887	-0.476667	4.0768	1.16249	9.53
120	1989-07-01	2.05	4.44899	-0.08904	-0.57	3.86098	1.15157	9.24
121	1989-08-01	1.62	4.15139	0.38212	-0.563333	3.78701	1.15528	8.99
122	1989-09-01	1.6	3.87724	0.29885	-0.456667	3.84934	1.18834	9.02
123	1989-10-01	1.89	3.94453	-0.2624	-0.45	3.68648	1.23129	8.84
124	1989-11-01	1.97	3.93028	-0.09368	-0.343333	3.95396	1.24613	8.55
125	1989-12-01	1.89	3.90622	0.04231	-0.336667	4.01228	1.30864	8.45
126	1990-01-01	1.51	4.16043	-0.92843	-0.33	3.71877	1.25395	8.23
127	1990-02-01	1.63	4.27233	0.51409	-0.423333	3.71296	1.22906	8.24
128	1990-03-01	1.56	4.27653	0.76923	-0.516667	3.71829	1.255	8.28
129	1990-04-01	1.26	3.80366	0.5233	-0.31	3.75743	1.23328	8.26
130	1990-05-01	1.81	3.65926	1.44375	-0.303333	3.75457	1.26778	8.18
131	1990-06-01	1.79	3.88871	1.72282	-0.496667	3.85172	1.23023	8.29
132	1990-07-01	1.84	3.89754	2.5116	-0.19	3.84471	1.22205	8.15
133	1990-08-01	1.55	4.57649	1.89846	0.0166667	3.88445	1.20607	8.13
134	1990-09-01	1.82	4.9849	2.39855	0.223333	3.93754	1.22959	8.2
135	1990-10-01	2.09	5.17478	1.70487	0.23	3.95959	1.28738	8.11
136	1990-11-01	2.36	5.07863	0.17917	0.533333	4.05687	1.22253	7.81
137	1990-12-01	2.35	4.87368	-1.07882	0.636667	4.00942	1.28833	7.31
138	1991-01-01	2.42	4.48021	-0.84677	0.74	3.92022	1.25435	6.91
139	1991-02-01	2.05	4.07478	-2.49751	0.946667	3.9536	1.20162	6.25
140	1991-03-01	2.04	3.7056	-3.48147	1.15333	3.95712	1.18995	6.12
141	1991-04-01	1.92	3.67707	-3.12219	1.06	3.90085	1.14729	5.91
142	1991-05-01	1.8	3.87289	-2.36921	1.26667	4.02448	1.16693	5.78
143	1991-06-01	1.72	3.59076	-1.79905	1.27333	4.06482	1.15186	5.9
144	1991-07-01	1.69	3.49797	-1.57805	1.18	4.01514	1.09854	5.82
145	1991-08-01	1.83	3.05171	-1.79758	1.28667	4.06466	1.03142	5.66
146	1991-09-01	2.04	2.77669	-1.06673	1.29333	4.10506	1.03848	5.45
147	1991-10-01	2.02	2.38314	-0.47959	1.4	4.10313	1.05114	5.21
148	1991-11-01	2.07	2.47791	0.58423	1.40333	4.20102	1.02122	4.81
149	1991-12-01	2.55	2.63848	0.84454	1.70667	4.35898	1.11672	4.43
150	1992-01-01	1.82	2.38897	0.72694	1.71	4.14763	1.07055	4.03
151	1992-02-01	1.96	2.59626	2.13668	1.81667	4.16763	1.03248	4.06
152	1992-03-01	1.71	2.82427	3.54137	1.82333	4.16069	1.02119	3.98
153	1992-04-01	1.6	2.9147	4.10747	1.83	4.14438	1.00328	3.73
154	1992-05-01	1.8	2.62483	3.41777	2.03667	4.30856	1.00737	3.82
155	1992-06-01	1.91	2.6342	2.5011	2.24333	4.2723	0.967494	3.76
156	1992-07-01	2.12	2.81059	3.31425	2.15	4.18685	0.973247	3.25
157	1992-08-01	2.03	2.711	2.72567	2.05333	4.22207	0.956636	3.3
158	1992-09-01	2.25	2.52521	2.06274	2.05667	4.47914	0.99753	3.22
159	1992-10-01	2.04	2.69511	3.00041	1.76	4.25662	0.967109	3.1
160	1992-11-01	2.01	2.67101	3.56444	1.86667	4.38132	0.958032	3.09
161	1992-12-01	2.11	2.59332	4.05936	1.87333	4.48102	1.00741	2.92
162	1993-01-01	2.28	2.7045	5.09622	1.78	4.42749	0.900694	3.02
163	1993-02-01	2.36	2.5983	4.81262	1.58333	4.44673	0.879607	3.03
164	1993-03-01	2.12	2.56048	3.80318	1.48667	4.44991	0.932082	3.07
165	1993-04-01	2.09	2.55508	3.38035	1.59	4.51334	0.919047	2.96
166	1993-05-01	2.05	2.73719	2.6827	1.59667	4.66103	0.920899	3
167	1993-06-01	2.27	2.59048	2.84065	1.50333	4.73661	0.926445	3.04
168	1993-07-01	2.1	2.41529	2.2385	1.41	4.58058	0.898261	3.06
169	1993-08-01	2.15	2.45367	2.63359	1.31333	4.63277	0.875287	3.03
170	1993-09-01	1.94	2.39328	2.88421	1.21667	4.71137	0.930708	3.09
171	1993-10-01	1.88	2.35381	2.90057	1.32	4.64517	0.921377	2.99
172	1993-11-01	1.83	2.34624	2.89406	1.12333	5.02664	0.620437	3.02
173	1993-12-01	1.86	2.19191	3.35723	1.02667	4.87673	0.910092	2.96
174	1994-01-01	1.95	1.97643	3.29783	1.13	4.73118	0.923787	3.05
175	1994-02-01	1.61	2.06004	2.87872	1.13667	4.7529	0.949564	3.25
176	1994-03-01	1.36	2.13196	4.0591	1.04333	4.78708	0.874071	3.34
177	1994-04-01	1.46	1.98175	4.28956	0.95	4.77521	0.887858	3.56
178	1994-05-01	1.45	1.81403	5.18449	0.653333	4.76353	0.832823	4.01
179	1994-06-01	1.31	2.02733	5.67853	0.656667	4.84045	0.839509	4.25
180	1994-07-01	1.68	2.18686	5.51664	0.66	4.80741	0.841412	4.26
181	1994-08-01	1.55	2.2455	6.25612	0.563333	4.79553	0.839831	4.47
182	1994-09-01	1.36	2.2533	6.15309	0.466667	4.76469	0.844811	4.73
183	1994-10-01	1.39	2.10467	6.23628	0.37	4.81052	0.851082	4.76
184	1994-11-01	1.41	2.10646	6.44923	0.173333	4.89696	0.860773	5.29
185	1994-12-01	1.26	2.14922	6.98262	0.0766667	4.94292	0.919624	5.45
186	1995-01-01	1.48	2.32143	6.77296	0.18	4.79018	0.830277	5.53
187	1995-02-01	1.63	2.26574	6.58672	-0.0166667	4.87544	0.883781	5.92
188	1995-03-01	1.5	2.17204	5.66007	-0.0133333	4.90053	0.836181	5.98
189	1995-04-01	1.53	2.32129	4.99317	0.39	5.01897	0.872296	6.05
190	1995-05-01	1.9	2.3308	4.81589	0.193333	4.95449	0.841187	6.01
191	1995-06-01	1.69	2.18105	4.50451	0.196667	4.91532	0.814701	6
192	1995-07-01	1.59	1.98649	3.93077	0.3	4.82958	0.86085	5.85
193	1995-08-01	1.91	1.97344	4.62034	0.303333	4.86741	0.8184	5.74
194	1995-09-01	1.76	1.92872	4.64109	0.206667	4.85668	0.809824	5.8
195	1995-10-01	1.72	2.02167	3.63305	0.11	4.87846	0.823943	5.76
196	1995-11-01	1.92	1.82437	3.24488	0.213333	4.90085	0.801051	5.8
197	1995-12-01	1.91	1.95301	2.57579	0.216667	4.95821	0.82698	5.6
198	1996-01-01	1.87	1.97443	1.72439	0.22	4.75119	0.801435	5.56
199	1996-02-01	1.5	1.95406	3.45391	0.123333	4.87922	0.782186	5.22
200	1996-03-01	1.69	2.07395	3.20739	0.126667	4.86625	0.798018	5.31
201	1996-04-01	1.53	2.11048	4.22476	0.23	4.95772	0.815919	5.22
202	1996-05-01	1.45	2.12959	4.6313	0.233333	4.80877	0.799022	5.24
203	1996-06-01	1.67	2.02839	5.15587	-0.0633333	4.79595	0.764678	5.27
204	1996-07-01	1.55	2.1179	5.43419	0.14	4.75405	0.769248	5.4
205	1996-08-01	1.22	1.99368	4.71859	-0.256667	4.85108	0.776517	5.22
206	1996-09-01	1.63	2.212	5.02005	-0.153333	4.85543	0.759953	5.3
207	1996-10-01	1.7	2.25618	5.09294	-0.15	4.72987	0.781438	5.24
208	1996-11-01	1.73	2.44068	5.75418	0.0533333	4.81485	0.766696	5.31
209	1996-12-01	1.46	2.36266	6.04	0.0566667	4.93895	0.821114	5.29
210	1997-01-01	1.56	2.26764	6.8832	-0.04	4.88437	0.786813	5.25
211	1997-02-01	1.38	2.32199	6.51119	-0.136667	4.86827	0.745462	5.19
212	1997-03-01	1.26	2.12117	7.35939	-0.133333	4.86744	0.738573	5.39
213	1997-04-01	1.62	1.91609	6.41057	-0.23	4.96031	0.764769	5.51
214	1997-05-01	1.53	1.6925	6.25278	-0.426667	4.85479	0.728514	5.5
215	1997-06-01	1.51	1.82525	5.87542	-0.323333	4.93529	0.721434	5.56
216	1997-07-01	1.73	1.66983	6.81323	-0.42	4.8478	0.726789	5.52
217	1997-08-01	1.48	1.65598	7.3131	-0.516667	4.90986	0.711006	5.54
218	1997-09-01	1.58	1.61459	7.5292	-0.413333	4.86172	0.696116	5.54
219	1997-10-01	1.73	1.43884	8.52266	-0.61	4.78477	0.711706	5.5
220	1997-11-01	1.56	1.26301	8.52359	-0.706667	4.94983	0.692788	5.52
221	1997-12-01	1.57	1.12499	8.14282	-0.603333	4.98318	0.748415	5.5
222	1998-01-01	1.66	1.04386	8.55871	-0.7	4.98089	0.727984	5.56
223	1998-02-01	1.63	0.78024	7.39525	-0.696667	4.96121	0.693123	5.51
224	1998-03-01	1.65	0.69057	6.73824	-0.593333	4.92421	0.679397	5.49
225	1998-04-01	1.65	0.71545	7.09602	-0.99	5.24834	0.74098	5.45
226	1998-05-01	1.74	0.90146	7.16218	-0.89	4.94426	0.691023	5.49
227	1998-06-01	1.69	0.68664	5.97245	-0.79	5.01612	0.688187	5.56
228	1998-07-01	1.65	0.87559	4.81762	-0.79	4.96939	0.686277	5.54
229	1998-08-01	2.09	0.93393	5.86427	-0.786667	4.95193	0.709284	5.55
230	1998-09-01	2.65	0.63183	4.72787	-0.683333	4.93277	0.694444	5.51
231	1998-10-01	2.54	0.72192	4.66191	-0.78	4.8594	0.711277	5.07
232	1998-11-01	2.6	0.72322	3.68476	-0.876667	4.92481	0.740309	4.83
233	1998-12-01	2.58	0.84506	3.75081	-0.873333	5.05207	0.816384	4.68
234	1999-01-01	2.63	0.93819	3.69958	-0.97	4.96093	0.747725	4.63
235	1999-02-01	2.1	0.93198	4.11466	-0.866667	5.00112	0.751173	4.76
236	1999-03-01	2.28	0.99199	4.20562	-1.06333	5.08577	0.677382	4.81
237	1999-04-01	2.12	1.3553	4.12466	-0.96	5.05901	0.688557	4.74
238	1999-05-01	2.08	1.28144	4.1694	-1.05667	5.06806	0.655647	4.74
239	1999-06-01	2.21	1.39862	4.6555	-0.953333	5.08518	0.634551	4.76
240	1999-07-01	2.03	1.41781	5.68312	-0.95	5.07481	0.668543	4.99
241	1999-08-01	2.17	1.46105	3.9953	-1.04667	5.08826	0.702944	5.07
242	1999-09-01	2.3	1.88491	3.75892	-1.04333	5.09708	0.736441	5.22
243	1999-10-01	2.36	1.83433	4.29411	-1.14	5.0121	0.821135	5.2
244	1999-11-01	1.97	1.9205	4.86047	-1.13333	5.00099	1.03002	5.42
245	1999-12-01	1.74	2.05516	5.27366	-1.22667	4.83792	1.85633	5.3
246	2000-01-01	1.65	2.18862	4.79626	-1.22	5.0287	0.967199	5.45
247	2000-02-01	1.87	2.56743	4.54756	-1.11667	5.00638	0.8828	5.73
248	2000-03-01	2.34	2.93086	4.7769	-1.21333	4.98421	0.760298	5.85
249	2000-04-01	2.17	2.35028	5.24785	-1.41	4.96643	0.981625	6.02
250	2000-05-01	2.61	2.36982	4.69864	-1.20667	4.97585	0.679035	6.27
251	2000-06-01	2.45	2.68495	4.97527	-1.20333	4.93707	0.793952	6.53
252	2000-07-01	2.31	2.66864	4.16391	-1.2	4.96079	0.750327	6.54
253	2000-08-01	2.53	2.47645	3.41737	-1.09667	4.96131	0.673608	6.5
254	2000-09-01	2.55	2.54854	4.25272	-1.29333	4.93679	0.680601	6.52
255	2000-10-01	2.57	2.51424	2.5805	-1.29	4.8946	0.684006	6.51
256	2000-11-01	2.8	2.56537	2.11014	-1.28667	4.92225	0.794113	6.51
257	2000-12-01	2.9	2.48538	1.06887	-1.28333	4.94353	0.999588	6.4
258	2001-01-01	2.74	2.70148	0.40193	-0.98	4.95097	0.890656	5.98
259	2001-02-01	2.95	2.53933	-0.48437	-0.976667	4.97919	0.880392	5.49
260	2001-03-01	2.91	2.10919	-1.12593	-0.873333	5.00844	0.697094	5.31
261	2001-04-01	2.72	2.37354	-2.12913	-0.77	4.99201	0.719027	4.8
262	2001-05-01	2.64	2.55675	-2.88356	-0.866667	4.97551	0.965473	4.21
263	2001-06-01	2.55	2.39173	-3.55633	-0.663333	5.05325	0.743044	3.97
264	2001-07-01	2.9	2.10193	-3.96284	-0.56	5.06875	0.893764	3.77
265	2001-08-01	3	2.09567	-3.81075	-0.256667	5.07677	0.76952	3.65
266	2001-09-01	3.43	1.3139	-4.54609	-0.153333	5.01097	1.06057	3.07
267	2001-10-01	3.61	1.53207	-4.67361	0.15	5.11387	0.850486	2.49
268	2001-11-01	3.03	1.3217	-5.16738	0.353333	5.20271	0.925948	2.09
269	2001-12-01	2.98	1.06233	-4.88315	0.556667	5.17047	0.994559	1.82
270	2002-01-01	2.8	0.66612	-3.66165	0.56	5.21864	0.878245	1.73
271	2002-02-01	3.01	0.67768	-3.09198	0.563333	5.28791	0.83127	1.74
272	2002-03-01	2.69	0.94338	-2.05291	0.566667	5.32181	0.766725	1.73
273	2002-04-01	2.92	1.18817	-1.36448	0.77	5.35589	0.749214	1.75
274	2002-05-01	3.01	0.98817	-0.34172	0.673333	5.40365	1.00857	1.75
275	2002-06-01	3.09	0.93509	1.2115	0.676667	5.4154	0.86635	1.75
276	2002-07-01	3.39	1.19212	1.54493	0.68	5.45557	0.802578	1.73
277	2002-08-01	3.44	1.40392	1.68196	0.583333	5.51366	0.68293	1.74
278	2002-09-01	3.77	1.93272	2.21734	0.586667	5.50785	0.684383	1.75
279	2002-10-01	3.8	1.75939	2.35488	0.59	5.53113	0.762263	1.75
280	2002-11-01	3.4	1.92975	3.39679	0.793333	5.51001	0.798346	1.34
281	2002-12-01	3.62	2.13244	2.8656	0.896667	5.64674	0.930399	1.24
282	2003-01-01	3.35	2.34482	2.81189	0.7	5.6473	0.748328	1.24
283	2003-02-01	3.35	2.60616	3.15988	0.803333	5.66755	0.766229	1.26
284	2003-03-01	3.12	2.58909	2.10651	0.806667	5.73065	0.752247	1.25
285	2003-04-01	2.96	1.98934	0.97633	0.91	5.74842	0.879424	1.26
286	2003-05-01	3.01	1.80676	0.57623	1.01333	5.7727	0.834048	1.26
287	2003-06-01	2.65	1.78837	-0.20963	1.21667	5.7173	0.806963	1.22
288	2003-07-01	2.13	1.86239	0.46091	1.12	5.69516	0.76277	1.01
289	2003-08-01	2.56	2.00571	0.31021	1.02333	5.6494	0.751609	1.03
290	2003-09-01	2.83	2.1414	0.76029	1.02667	5.62216	0.730203	1.01
291	2003-10-01	2.4	1.96894	1.21261	0.93	5.6314	0.757497	1.01
292	2003-11-01	2.32	1.99648	1.47298	0.733333	5.63976	0.784618	1
293	2003-12-01	2.33	2.12353	1.88371	0.636667	5.63598	0.886705	0.98
294	2004-01-01	2.28	2.21273	1.56104	0.64	5.65056	0.747289	1
295	2004-02-01	2.28	1.99978	1.84337	0.543333	5.63196	0.663723	1.01
296	2004-03-01	2.25	1.89616	1.56964	0.746667	5.60252	0.7201	1
297	2004-04-01	1.93	2.25877	2.74287	0.55	5.62135	0.802367	1
298	2004-05-01	2.09	2.70778	3.5392	0.553333	5.59276	0.743433	1
299	2004-06-01	2.16	2.89129	2.5201	0.556667	5.66936	0.760326	1.03
300	2004-07-01	2.12	2.68481	2.86148	0.46	5.64966	0.653144	1.26
301	2004-08-01	2.33	2.39245	3.09519	0.363333	5.64936	0.65529	1.43
302	2004-09-01	2.13	2.27273	2.57767	0.366667	5.66523	0.711283	1.61
303	2004-10-01	2.16	2.69967	3.3984	0.47	5.66926	0.678694	1.76
304	2004-11-01	1.84	2.96503	2.82682	0.373333	5.68795	0.786223	1.93
305	2004-12-01	1.91	2.79375	3.65339	0.376667	5.70114	0.739681	2.16
306	2005-01-01	1.88	2.53262	3.8682	0.28	5.63217	0.701719	2.28
307	2005-02-01	1.46	2.59896	3.9462	0.383333	5.63211	0.680532	2.5
308	2005-03-01	1.56	2.74774	4.31621	0.186667	5.60864	0.703604	2.63
309	2005-04-01	1.84	2.8439	4.00504	0.19	5.59464	0.709678	2.79
310	2005-05-01	2.01	2.56989	3.32153	0.0933333	5.61593	0.677088	3
311	2005-06-01	1.92	2.33993	4.58064	-0.00333333	5.58007	0.646069	3.04
312	2005-07-01	1.67	2.67968	3.4626	0	5.53695	0.684243	3.26
313	2005-08-01	1.94	3.04012	3.66598	-0.1	5.5536	0.706058	3.5
314	2005-09-01	1.69	3.83077	1.6458	0	5.58117	0.664881	3.62
315	2005-10-01	1.73	3.55116	1.95851	0	5.5829	0.600631	3.78
316	2005-11-01	1.9	2.93935	2.77349	0.00333333	5.59289	0.683102	4
317	2005-12-01	1.93	2.88395	2.6619	-0.0933333	5.53531	0.769742	4.16
318	2006-01-01	1.71	3.24706	2.30113	-0.29	5.51757	0.608324	4.29
319	2006-02-01	1.72	3.0225	1.62998	-0.19	5.54512	0.648468	4.49
320	2006-03-01	1.55	2.91357	1.9721	-0.29	5.53294	0.548137	4.59
321	2006-04-01	1.61	3.10237	2.23255	-0.29	5.54943	0.620108	4.79
322	2006-05-01	1.63	3.32176	1.99112	-0.386667	5.53329	0.647155	4.94
323	2006-06-01	1.63	3.51295	1.99112	-0.383333	5.56075	0.566611	4.99
324	2006-07-01	1.77	3.42781	2.27111	-0.28	5.54754	0.557022	5.24
325	2006-08-01	1.85	3.33601	2.38711	-0.276667	5.52421	0.606552	5.25
326	2006-09-01	1.79	2.08113	4.11695	-0.473333	5.51701	0.581581	5.25
327	2006-10-01	1.81	1.67724	2.76565	-0.57	5.50091	0.60295	5.25
328	2006-11-01	1.74	1.92408	1.62028	-0.463333	5.49607	0.597979	5.25
329	2006-12-01	1.51	2.28684	2.06071	-0.556667	5.53019	0.646424	5.24
330	2007-01-01	1.51	2.13322	1.41277	-0.35	5.51166	0.614718	5.25
331	2007-02-01	1.72	2.38868	2.44192	-0.443333	5.4681	0.676628	5.26
332	2007-03-01	1.62	2.56581	2.4483	-0.536667	5.49324	0.625467	5.26
333	2007-04-01	1.76	2.33149	2.76972	-0.43	5.4882	0.645191	5.25
334	2007-05-01	1.49	2.35323	2.91573	-0.526667	5.49534	0.603079	5.25
335	2007-06-01	1.67	2.31726	2.5421	-0.323333	5.48044	0.51725	5.25
336	2007-07-01	1.87	2.12444	2.53518	-0.22	5.49344	0.508386	5.26
337	2007-08-01	2.11	1.87347	2.35295	-0.313333	5.38484	0.605549	5.02
338	2007-09-01	2	2.53418	2.9666	-0.206667	5.32537	0.753191	4.94
339	2007-10-01	2	3.08932	2.59775	-0.2	5.32844	0.709461	4.76		ys1								ysd
340	2007-11-01	2.43	3.59924	3.2857	-0.196667	5.30845	0.678959	4.49		2.43	3.59924	3.2857	-0.196667	5.30845	0.678959	4.49		2.43	3.59924	3.2857	-0.196667	5.30845	0.678959	4.49
341	2007-12-01	2.61	3.47197	2.25865	0.106667	5.12434	0.923873	4.24		2.61	3.47197	2.25865	0.106667	5.12434	0.923873	4.24		2.61	3.47197	2.25865	0.106667	5.12434	0.923873	4.24
342	2008-01-01	2.87	3.3884	2.51875	0.11	4.86893	1.23282	3.94		2.87	3.3884	2.51875	0.11	4.86893	1.23282	3.94		2.87	3.3884	2.51875	0.11	4.86893	1.23282	3.94
343	2008-02-01	3.29	3.27298	1.12937	-0.00666667	4.89638	1.23872	2.98		3.29	3.27298	1.12937	-0.00666667	4.89638	1.23872	2.98		3.29	3.27298	1.12937	-0.00666667	4.89638	1.23872	2.98
344	2008-03-01	3.44	3.19059	0.68412	0.176667	4.18529	1.92523	2.61		3.44	3.19059	0.68412	0.176667	4.18529	1.92523	2.61		3.44	3.19059	0.68412	0.176667	4.18529	1.92523	2.61
345	2008-04-01	3.2	3.1403	-0.79338	0.06	3.73292	2.30931	2.28		3.2	3.1403	-0.79338	0.06	3.73292	2.30931	2.28		3.2	3.1403	-0.79338	0.06	3.73292	2.30931	2.28
346	2008-05-01	2.87	3.28228	-1.3936	0.453333	3.3308	2.8009	1.98		2.87	3.28228	-1.3936	0.453333	3.3308	2.8009	1.98		2.87	3.28228	-1.3936	0.453333	3.3308	2.8009	1.98
347	2008-06-01	3.08	3.81178	-1.65521	0.646667	3.19748	2.76421	2		3.08	3.81178	-1.65521	0.646667	3.19748	2.76421	2		3.08	3.81178	-1.65521	0.646667	3.19748	2.76421	2
348	2008-07-01	3.17	4.1354	-2.13142	0.84	3.21516	2.94821	2.01		3.17	4.1354	-2.13142	0.84	3.21516	2.94821	2.01		3.17	4.1354	-2.13142	0.84	3.21516	2.94821	2.01
349	2008-08-01	3.32	3.98108	-3.83602	1.10333	3.2281	2.89628	2		3.32	3.98108	-3.83602	1.10333	3.2281	2.89628	2		3.32	3.98108	-3.83602	1.10333	3.2281	2.89628	2
350	2008-09-01	3.46	3.66714	-8.36254	1.06667	3.23266	4.98723	1.81		3.46	3.66714	-8.36254	1.06667	3.23266	4.98723	1.81		3.46	3.66714	-8.36254	1.06667	3.23266	4.98723	1.81
351	2008-10-01	4.87	2.67195	-7.09753	1.43	3.25524	10.1976	0.97		4.87	2.67195	-7.09753	1.43	3.25524	10.1976	0.97		4.87	2.67195	-7.09753	1.43	3.25524	10.1976	0.97
352	2008-11-01	6.28	0.92617	-8.78269	1.69333	3.25122	11.1219	0.39		6.28	0.92617	-8.78269	1.69333	3.25122	11.1219	0.39		6.28	0.92617	-8.78269	1.69333	3.25122	11.1219	0.39
353	2008-12-01	6.18	0.12893	-11.4862	2.15667	3.30766	12.2566	0.16		6.18	0.12893	-11.4862	2.15667	3.30766	12.2566	0.16		6.18	0.12893	-11.4862	2.15667	3.30766	12.2566	0.16
354	2009-01-01	5.27	-0.11146	-13.362	2.62	3.28937	10.052	0.15		5.27	-0.11146	-13.362	2.62	3.28937	10.052	0.15		5.27	-0.11146	-13.362	2.62	3.28937	10.052	0.15
355	2009-02-01	5.06	-0.13156	-13.6336	3.09667	3.29557	10.0085	0.22		5.06	-0.13156	-13.6336	3.09667	3.29557	10.0085	0.22		5.06	-0.13156	-13.6336	3.09667	3.29557	10.0085	0.22
356	2009-03-01	5.71	-0.52581	-14.7946	3.47333	3.31137	11.1378	0.18		5.71	-0.52581	-14.7946	3.47333	3.31137	11.1378	0.18		5.71	-0.52581	-14.7946	3.47333	3.31137	11.1378	0.18
357	2009-04-01	5.23	-0.56742	-14.8321	3.75	3.83186	10.592	0.15		5.23	-0.56742	-14.8321	3.75	3.83186	10.592	0.15		5.23	-0.56742	-14.8321	3.75	3.83186	10.592	0.15
358	2009-05-01	4.59	-0.88936	-15.208	4.11333	4.18212	10.3133	0.18		4.59	-0.88936	-15.208	4.11333	4.18212	10.3133	0.18		4.59	-0.88936	-15.208	4.11333	4.18212	10.3133	0.18
359	2009-06-01	3.97	-1.01872	-15.3319	4.17667	4.5424	9.54371	0.21		3.97	-1.01872	-15.3319	4.17667	4.5424	9.54371	0.21		3.97	-1.01872	-15.3319	4.17667	4.5424	9.54371	0.21
360	2009-07-01	3.57	-1.46654	-13.9455	4.14	4.84928	9.09409	0.16		3.57	-1.46654	-13.9455	4.14	4.84928	9.09409	0.16		3.57	-1.46654	-13.9455	4.14	4.84928	9.09409	0.16
361	2009-08-01	3.18	-1.10079	-11.6128	4.2	5.15344	9.20178	0.16		3.18	-1.10079	-11.6128	4.2	5.15344	9.20178	0.16		3.18	-1.10079	-11.6128	4.2	5.15344	9.20178	0.16
362	2009-09-01	3	-1.02236	-6.91099	4.36	5.31949	9.48774	0.15		3	-1.02236	-6.91099	4.36	5.31949	9.48774	0.15		3	-1.02236	-6.91099	4.36	5.31949	9.48774	0.15
363	2009-10-01	2.88	0.01265	-7.4974	4.52	5.27957	9.45392	0.12		2.88	0.01265	-7.4974	4.52	5.27957	9.45392	0.12		2.88	0.01265	-7.4974	4.52	5.27957	9.45392	0.12
364	2009-11-01	3.11	1.45973	-5.93794	4.37333	5.3033	9.76491	0.12		3.11	1.45973	-5.93794	4.37333	5.3033	9.76491	0.12		3.11	1.45973	-5.93794	4.37333	5.3033	9.76491	0.12
365	2009-12-01	2.52	2.09031	-2.82117	4.32667	5.32979	10.0028	0.12		2.52	2.09031	-2.82117	4.32667	5.32979	10.0028	0.12		2.52	2.09031	-2.82117	4.32667	5.32979	10.0028	0.12
366	2010-01-01	2.62	2.30143	0.71589	4.18	5.29334	10.0212	0.11		2.62	2.30143	0.71589	4.18	5.29334	10.0212	0.11		2.62	2.30143	0.71589	4.18	5.29334	10.0212	0.11
367	2010-02-01	2.73	2.11633	1.73578	4.16667	5.28563	10.275	0.13		2.73	2.11633	1.73578	4.16667	5.28563	10.275	0.13		2.73	2.11633	1.73578	4.16667	5.28563	10.275	0.13
368	2010-03-01	2.43	2.37276	4.04669	4.25333	5.24775	10.3403	0.16		2.43	2.37276	4.04669	4.25333	5.24775	10.3403	0.16		2.43	2.37276	4.04669	4.25333	5.24775	10.3403	0.16
369	2010-04-01	2.56	2.28156	5.28235	4.24	5.2134	10.429	0.2		2.56	2.28156	5.28235	4.24	5.2134	10.429	0.2		2.56	2.28156	5.28235	4.24	5.2134	10.429	0.2
370	2010-05-01	2.74	2.20753	7.88374	3.93	5.21425	10.4514	0.2		2.74	2.20753	7.88374	3.93	5.21425	10.4514	0.2		2.74	2.20753	7.88374	3.93	5.21425	10.4514	0.2
371	2010-06-01	3.26	1.56189	8.4559	3.72	5.18659	10.3724	0.18		3.26	1.56189	8.4559	3.72	5.18659	10.3724	0.18		3.26	1.56189	8.4559	3.72	5.18659	10.3724	0.18
372	2010-07-01	3.07	1.63826	7.73329	3.71	5.16057	10.2829	0.18		3.07	1.63826	7.73329	3.71	5.16057	10.2829	0.18		3.07	1.63826	7.73329	3.71	5.16057	10.2829	0.18
373	2010-08-01	3.19	1.483	6.87216	3.79667	5.21266	10.0766	0.19		3.19	1.483	6.87216	3.79667	5.21266	10.0766	0.19		3.19	1.483	6.87216	3.79667	5.21266	10.0766	0.19
374	2010-09-01	3.13	1.41921	6.30174	3.78333	5.36356	9.82634	0.19		3.13	1.41921	6.30174	3.78333	5.36356	9.82634	0.19		3.13	1.41921	6.30174	3.78333	5.36356	9.82634	0.19
375	2010-10-01	3.09	1.35798	5.6767	3.67	5.50437	9.57556	0.19		3.09	1.35798	5.6767	3.67	5.50437	9.57556	0.19		3.09	1.35798	5.6767	3.67	5.50437	9.57556	0.19
376	2010-11-01	3.11	1.30727	5.2972	4.06	5.93152	9.50874	0.19		3.11	1.30727	5.2972	4.06	5.93152	9.50874	0.19		3.11	1.30727	5.2972	4.06	5.93152	9.50874	0.19
377	2010-12-01	2.8	1.47677	5.97288	3.55	6.63816	9.17535	0.18		2.8	1.47677	5.97288	3.55	6.63816	9.17535	0.18		2.8	1.47677	5.97288	3.55	6.63816	9.17535	0.18
378	2011-01-01	2.67	1.55955	4.63697	3.34	7.33859	8.75192	0.17		2.67	1.55955	4.63697	3.34	7.33859	8.75192	0.17		2.67	1.55955	4.63697	3.34	7.33859	8.75192	0.17
379	2011-02-01	2.73	1.84593	3.81209	3.23333	7.97246	8.67134	0.16		2.73	1.84593	3.81209	3.23333	7.97246	8.67134	0.16		2.73	1.84593	3.81209	3.23333	7.97246	8.67134	0.16
380	2011-03-01	2.56	2.11144	4.16228	3.22667	8.63008	8.34293	0.14		2.56	2.11144	4.16228	3.22667	8.63008	8.34293	0.14		2.56	2.11144	4.16228	3.22667	8.63008	8.34293	0.14
381	2011-04-01	2.7	2.48712	3.41276	3.32	9.10429	8.22863	0.1		2.7	2.48712	3.41276	3.32	9.10429	8.22863	0.1		2.7	2.48712	3.41276	3.32	9.10429	8.22863	0.1
382	2011-05-01	2.73	2.76679	2.15899	3.21667	9.79859	8.09818	0.09		2.73	2.76679	2.15899	3.21667	9.79859	8.09818	0.09		2.73	2.76679	2.15899	3.21667	9.79859	8.09818	0.09
383	2011-06-01	2.57	2.78889	2.28419	3.31333	10.4612	8.07487	0.09		2.57	2.78889	2.28419	3.31333	10.4612	8.07487	0.09		2.57	2.78889	2.28419	3.31333	10.4612	8.07487	0.09
384	2011-07-01	2.94	2.8754	2.38844	3.21	10.5275	7.87501	0.07		2.94	2.8754	2.38844	3.21	10.5275	7.87501	0.07		2.94	2.8754	2.38844	3.21	10.5275	7.87501	0.07
385	2011-08-01	3.13	2.97592	2.65066	3.20667	10.5508	7.6748	0.1		3.13	2.97592	2.65066	3.20667	10.5508	7.6748	0.1		3.13	2.97592	2.65066	3.20667	10.5508	7.6748	0.1
386	2011-09-01	3.35	3.01889	2.37357	3.20333	10.701	7.62576	0.08		3.35	3.01889	2.37357	3.20333	10.701	7.62576	0.08		3.35	3.01889	2.37357	3.20333	10.701	7.62576	0.08
387	2011-10-01	3.2	2.69413	3.3586	3	10.6122	7.38465	0.07		3.2	2.69413	3.3586	3	10.6122	7.38465	0.07		3.2	2.69413	3.3586	3	10.6122	7.38465	0.07
388	2011-11-01	3.06	2.70018	3.25308	2.81	10.5894	7.23379	0.08		3.06	2.70018	3.25308	2.81	10.5894	7.23379	0.08		3.06	2.70018	3.25308	2.81	10.5894	7.23379	0.08
389	2011-12-01	3.36	2.52628	2.84899	2.72	10.5913	7.94302	0.07		3.36	2.52628	2.84899	2.72	10.5913	7.94302	0.07		3.36	2.52628	2.84899	2.72	10.5913	7.94302	0.07
390	2012-01-01	3.4	2.56932	3.57623	2.53	10.4572	7.9176	0.08		3.4	2.56932	3.57623	2.53	10.4572	7.9176	0.08		3.4	2.56932	3.57623	2.53	10.4572	7.9176	0.08
391	2012-02-01	3.16	2.51274	4.32352	2.54333	10.2827	7.8229	0.1		3.16	2.51274	4.32352	2.54333	10.2827	7.8229	0.1		3.16	2.51274	4.32352	2.54333	10.2827	7.8229	0.1
392	2012-03-01	3	2.2965	2.79303	2.45667	10.3984	7.57737	0.13		3	2.2965	2.79303	2.45667	10.3984	7.57737	0.13		3	2.2965	2.79303	2.45667	10.3984	7.57737	0.13
393	2012-04-01	3.24	1.99984	3.93707	2.47	10.3401	7.43249	0.14		3.24	1.99984	3.93707	2.47	10.3401	7.43249	0.14		3.24	1.99984	3.93707	2.47	10.3401	7.43249	0.14
394	2012-05-01	3.48	1.57628	3.90399	2.49333	10.2499	7.33769	0.16		3.48	1.57628	3.90399	2.49333	10.2499	7.33769	0.16		3.48	1.57628	3.90399	2.49333	10.2499	7.33769	0.16
395	2012-06-01	3.35	1.54605	3.58105	2.51667	10.3096	7.40508	0.16		3.35	1.54605	3.58105	2.51667	10.3096	7.40508	0.16		3.35	1.54605	3.58105	2.51667	10.3096	7.40508	0.16
396	2012-07-01	3.36	1.41023	3.30923	2.54	10.1552	7.35047	0.16		3.36	1.41023	3.30923	2.54	10.1552	7.35047	0.16		3.36	1.41023	3.30923	2.54	10.1552	7.35047	0.16
397	2012-08-01	3.34	1.51242	2.29296	2.46	10.1151	7.23981	0.13		3.34	1.51242	2.29296	2.46	10.1151	7.23981	0.13		3.34	1.51242	2.29296	2.46	10.1151	7.23981	0.13
398	2012-09-01	3.19	1.67742	2.33698	2.18	10.1116	7.09145	0.14		3.19	1.67742	2.33698	2.18	10.1116	7.09145	0.14		3.19	1.67742	2.33698	2.18	10.1116	7.09145	0.14
399	2012-10-01	2.86	1.97721	1.85781	2.2	10.1118	7.23847	0.16		2.86	1.97721	1.85781	2.2	10.1118	7.23847	0.16		2.86	1.97721	1.85781	2.2	10.1118	7.23847	0.16
400	2012-11-01	2.89	1.69922	2.42028	2.14667	10.0738	7.37022	0.16		2.89	1.69922	2.42028	2.14667	10.0738	7.37022	0.16		2.89	1.69922	2.42028	2.14667	10.0738	7.37022	0.16
401	2012-12-01	2.85	1.62552	2.18366	2.39333	10.0668	7.59668	0.16		2.85	1.62552	2.18366	2.39333	10.0668	7.59668	0.16		2.85	1.62552	2.18366	2.39333	10.0668	7.59668	0.16
402	2013-01-01	2.71	1.47398	1.52032	2.54	10.2949	7.81815	0.14		2.71	1.47398	1.52032	2.54	10.2949	7.81815	0.14		2.71	1.47398	1.52032	2.54	10.2949	7.81815	0.14
403	2013-02-01	2.96	1.61836	1.78856	2.29	10.5902	8.11753	0.15		2.96	1.61836	1.78856	2.29	10.5902	8.11753	0.15		2.96	1.61836	1.78856	2.29	10.5902	8.11753	0.15
404	2013-03-01	2.98	1.29142	2.68174	2.14	10.8246	8.49214	0.14		2.98	1.29142	2.68174	2.14	10.8246	8.49214	0.14		2.98	1.29142	2.68174	2.14	10.8246	8.49214	0.14
405	2013-04-01	2.89	1.07945	1.77917	2.29	11.0666	8.93424	0.15		2.89	1.07945	1.77917	2.29	11.0666	8.93424	0.15		2.89	1.07945	1.77917	2.29	11.0666	8.93424	0.15
406	2013-05-01	2.57	1.2591	1.65452	2.22667	11.3575	9.05419	0.11		2.57	1.2591	1.65452	2.22667	11.3575	9.05419	0.11		2.57	1.2591	1.65452	2.22667	11.3575	9.05419	0.11
407	2013-06-01	2.67	1.52852	1.89989	2.26333	11.5219	9.26247	0.09		2.67	1.52852	1.89989	2.26333	11.5219	9.26247	0.09		2.67	1.52852	1.89989	2.26333	11.5219	9.26247	0.09
408	2013-07-01	2.72	1.61821	1.12805	2.1	11.8112	9.46956	0.09		2.72	1.61821	1.12805	2.1	11.8112	9.46956	0.09		2.72	1.61821	1.12805	2.1	11.8112	9.46956	0.09
409	2013-08-01	2.64	1.43392	2.27439	2.03667	11.993	9.606	0.08		2.64	1.43392	2.27439	2.03667	11.993	9.606	0.08		2.64	1.43392	2.27439	2.03667	11.993	9.606	0.08
410	2013-09-01	2.83	1.16658	2.78594	2.07333	12.2093	9.90014	0.08		2.83	1.16658	2.78594	2.07333	12.2093	9.90014	0.08		2.83	1.16658	2.78594	2.07333	12.2093	9.90014	0.08
411	2013-10-01	2.74	1.03797	2.42171	2.11	12.4591	10.1523	0.09		2.74	1.03797	2.42171	2.11	12.4591	10.1523	0.09		2.74	1.03797	2.42171	2.11	12.4591	10.1523	0.09
412	2013-11-01	2.63	1.2643	2.23884	1.84667	12.636	10.2914	0.08		2.63	1.2643	2.23884	1.84667	12.636	10.2914	0.08		2.63	1.2643	2.23884	1.84667	12.636	10.2914	0.08
413	2013-12-01	2.34	1.48221	2.22736	1.68333	12.8955	10.6473	0.09		2.34	1.48221	2.22736	1.68333	12.8955	10.6473	0.09		2.34	1.48221	2.22736	1.68333	12.8955	10.6473	0.09
414	2014-01-01	2.52	1.47936	1.8115	1.62	13.1769	10.92	0.07		2.52	1.47936	1.8115	1.62	13.1769	10.92	0.07		2.52	1.47936	1.8115	1.62	13.1769	10.92	0.07
415	2014-02-01	2.44	1.16849	2.14451	1.75	13.3142	10.9968	0.07		2.44	1.16849	2.14451	1.75	13.3142	10.9968	0.07		2.44	1.16849	2.14451	1.75	13.3142	10.9968	0.07
416	2014-03-01	2.33	1.50461	2.72121	1.78	13.4597	11.1533	0.08		2.33	1.50461	2.72121	1.78	13.4597	11.1533	0.08		2.33	1.50461	2.72121	1.78	13.4597	11.1533	0.08
417	2014-04-01	2.23	1.78119	2.99651	1.31	13.5745	11.2383	0.09		2.23	1.78119	2.99651	1.31	13.5745	11.2383	0.09		2.23	1.78119	2.99651	1.31	13.5745	11.2383	0.09
418	2014-05-01	2.28	1.88991	3.2485	1.43333	13.6012	11.1985	0.09		2.28	1.88991	3.2485	1.43333	13.6012	11.1985	0.09		2.28	1.88991	3.2485	1.43333	13.6012	11.1985	0.09
419	2014-06-01	2.27	1.78508	3.39367	1.25667	13.671	11.2437	0.1		2.27	1.78508	3.39367	1.25667	13.671	11.2437	0.1		2.27	1.78508	3.39367	1.25667	13.671	11.2437	0.1
420	2014-07-01	2.15	1.81147	4.05625	1.38	13.7122	11.2537	0.09		2.15	1.81147	4.05625	1.38	13.7122	11.2537	0.09		2.15	1.81147	4.05625	1.38	13.7122	11.2537	0.09
421	2014-08-01	2.34	1.6422	3.23354	1.3	13.7022	11.1252	0.09		2.34	1.6422	3.23354	1.3	13.7022	11.1252	0.09		2.34	1.6422	3.23354	1.3	13.7022	11.1252	0.09
422	2014-09-01	2.28	1.62777	3.03222	1.12	13.8097	11.3383	0.09		2.28	1.62777	3.03222	1.12	13.8097	11.3383	0.09		2.28	1.62777	3.03222	1.12	13.8097	11.3383	0.09
423	2014-10-01	2.34	1.43037	3.19044	0.94	13.8056	11.358	0.09		2.34	1.43037	3.19044	0.94	13.8056	11.358	0.09		2.34	1.43037	3.19044	0.94	13.8056	11.358	0.09
424	2014-11-01	2.61	1.19453	3.69474	1.05333	13.7902	11.3401	0.09		2.61	1.19453	3.69474	1.05333	13.7902	11.3401	0.09		2.61	1.19453	3.69474	1.05333	13.7902	11.3401	0.09
425	2014-12-01	2.57	0.83853	3.22608	0.866667	13.8013	11.4179	0.12		2.57	0.83853	3.22608	0.866667	13.8013	11.4179	0.12		2.57	0.83853	3.22608	0.866667	13.8013	11.4179	0.12
426	2015-01-01	2.77	0.18284	3.08835	0.98	13.7592	11.4022	0.11		2.77	0.18284	3.08835	0.98	13.7592	11.4022	0.11		2.77	0.18284	3.08835	0.98	13.7592	11.4022	0.11
427	2015-02-01	2.51	0.28924	1.75451	0.79	13.643	11.2384	0.11		2.51	0.28924	1.75451	0.79	13.643	11.2384	0.11		2.51	0.28924	1.75451	0.79	13.643	11.2384	0.11
428	2015-03-01	2.6	0.28086	0.47452	0.7	13.6694	11.2312	0.11		2.6	0.28086	0.47452	0.7	13.6694	11.2312	0.11		2.6	0.28086	0.47452	0.7	13.6694	11.2312	0.11
429	2015-04-01	2.43	0.16352	-0.17366	0.71	13.5418	11.0725	0.12		2.43	0.16352	-0.17366	0.71	13.5418	11.0725	0.12		2.43	0.16352	-0.17366	0.71	13.5418	11.0725	0.12
430	2015-05-01	2.77	0.23028	-0.94196	0.92	13.5188	11.0064	0.12		2.77	0.23028	-0.94196	0.92	13.5188	11.0064	0.12		2.77	0.23028	-0.94196	0.92	13.5188	11.0064	0.12
431	2015-06-01	2.78	0.31154	-1.63108	0.63	13.4505	11.1179	0.13		2.78	0.31154	-1.63108	0.63	13.4505	11.1179	0.13		2.78	0.31154	-1.63108	0.63	13.4505	11.1179	0.13
432	2015-07-01	3	0.24324	-1.24724	0.54	13.4591	11.0668	0.13		3	0.24324	-1.24724	0.54	13.4591	11.0668	0.13		3	0.24324	-1.24724	0.54	13.4591	11.0668	0.13
433	2015-08-01	2.98	0.25684	-1.27788	0.446667	13.4417	10.9921	0.14		2.98	0.25684	-1.27788	0.446667	13.4417	10.9921	0.14		2.98	0.25684	-1.27788	0.446667	13.4417	10.9921	0.14
434	2015-09-01	3.28	0.08333	-1.94979	0.353333	13.3879	10.9964	0.14		3.28	0.08333	-1.94979	0.353333	13.3879	10.9964	0.14		3.28	0.08333	-1.94979	0.353333	13.3879	10.9964	0.14
435	2015-10-01	3.18	0.09401	-2.32339	0.36	13.3882	11.0266	0.12		3.18	0.09401	-2.32339	0.36	13.3882	11.0266	0.12		3.18	0.09401	-2.32339	0.36	13.3882	11.0266	0.12
436	2015-11-01	3.25	0.23182	-3.68516	0.463333	13.4338	10.999	0.12		3.25	0.23182	-3.68516	0.463333	13.4338	10.999	0.12		3.25	0.23182	-3.68516	0.463333	13.4338	10.999	0.12
437	2015-12-01	3.19	0.30406	-3.97509	0.366667	13.4136	11.0349	0.24		3.19	0.30406	-3.97509	0.366667	13.4136	11.0349	0.24		3.19	0.30406	-3.97509	0.366667	13.4136	11.0349	0.24
438	2016-01-01	3.51	0.82077	-2.68783	0.27	13.4064	11.008	0.34		3.51	0.82077	-2.68783	0.27	13.4064	11.008	0.34		3.51	0.82077	-2.68783	0.27	13.4064	11.008	0.34
439	2016-02-01	3.6	0.5924	-2.91825	0.273333	13.4322	11.0711	0.38		3.6	0.5924	-2.91825	0.273333	13.4322	11.0711	0.38		3.6	0.5924	-2.91825	0.273333	13.4322	11.0711	0.38
440	2016-03-01	3.35	0.63211	-3.37258	0.376667	13.2723	10.9007	0.36		3.35	0.63211	-3.37258	0.376667	13.2723	10.9007	0.36		3.35	0.63211	-3.37258	0.376667	13.2723	10.9007	0.36
441	2016-04-01	2.96	0.88718	-2.68983	0.38	13.2101	10.8048	0.37		2.96	0.88718	-2.68983	0.38	13.2101	10.8048	0.37		2.96	0.88718	-2.68983	0.38	13.2101	10.8048	0.37
442	2016-05-01	2.84	0.79588	-2.37	0.18	13.2293	10.7456	0.37		2.84	0.79588	-2.37	0.18	13.2293	10.7456	0.37		2.84	0.79588	-2.37	0.18	13.2293	10.7456	0.37
443	2016-06-01	3.04	0.79241	-1.67954	0.28	13.1802	10.7279	0.38		3.04	0.79241	-1.67954	0.28	13.1802	10.7279	0.38		3.04	0.79241	-1.67954	0.28	13.1802	10.7279	0.38
444	2016-07-01	2.76	0.75115	-2.01527	0.18	13.1894	10.7204	0.39		2.76	0.75115	-2.01527	0.18	13.1894	10.7204	0.39		2.76	0.75115	-2.01527	0.18	13.1894	10.7204	0.39
445	2016-08-01	2.66	0.90099	-1.98441	0.28	13.0901	10.5961	0.4		2.66	0.90099	-1.98441	0.28	13.0901	10.5961	0.4		2.66	0.90099	-1.98441	0.28	13.0901	10.5961	0.4
446	2016-09-01	2.71	1.22569	-1.73309	0.38	13.03	10.518	0.4		2.71	1.22569	-1.73309	0.38	13.03	10.518	0.4		2.71	1.22569	-1.73309	0.38	13.03	10.518	0.4
447	2016-10-01	2.54	1.46407	-1.25894	0.28	13.0677	10.56	0.4		2.54	1.46407	-1.25894	0.28	13.0677	10.56	0.4		2.54	1.46407	-1.25894	0.28	13.0677	10.56	0.4
448	2016-11-01	2.34	1.44092	-0.87898	0.08	12.9553	10.424	0.41		2.34	1.44092	-0.87898	0.08	12.9553	10.424	0.41		2.34	1.44092	-0.87898	0.08	12.9553	10.424	0.41
449	2016-12-01	2.38	1.70842	0.5066	0.08	12.9205	10.4254	0.54		2.38	1.70842	0.5066	0.08	12.9205	10.4254	0.54		2.38	1.70842	0.5066	0.08	12.9205	10.4254	0.54
450	2017-01-01	2.21	2.03667	-0.47762	0.08	12.9044	10.421	0.65		2.21	2.03667	-0.47762	0.08	12.9044	10.421	0.65		2.21	2.03667	-0.47762	0.08	12.9044	10.421	0.65
451	2017-02-01	2.28	2.18903	-0.18125	0.0766667	12.8759	10.481	0.66		2.28	2.18903	-0.18125	0.0766667	12.8759	10.481	0.66		2.28	2.18903	-0.18125	0.0766667	12.8759	10.481	0.66
452	2017-03-01	2.28	1.90083	1.16415	-0.226667	12.7916	10.4088	0.79		2.28	1.90083	1.16415	-0.226667	12.7916	10.4088	0.79		2.28	1.90083	1.16415	-0.226667	12.7916	10.4088	0.79
453	2017-04-01	2.28	1.83871	1.93311	-0.23	12.8279	10.4374	0.9		2.28	1.83871	1.93311	-0.23	12.8279	10.4374	0.9		2.28	1.83871	1.93311	-0.23	12.8279	10.4374	0.9
454	2017-05-01	2.34	1.65998	2.07773	-0.226667	12.7155	10.2935	0.91		2.34	1.65998	2.07773	-0.226667	12.7155	10.2935	0.91		2.34	1.65998	2.07773	-0.226667	12.7155	10.2935	0.91
455	2017-06-01	2.06	1.57715	1.78857	-0.323333	12.6541	10.2581	1.04		2.06	1.57715	1.78857	-0.323333	12.6541	10.2581	1.04		2.06	1.57715	1.78857	-0.323333	12.6541	10.2581	1.04
456	2017-07-01	2.09	1.56019	1.4461	-0.32	12.6566	10.2689	1.15		2.09	1.56019	1.4461	-0.32	12.6566	10.2689	1.15		2.09	1.56019	1.4461	-0.32	12.6566	10.2689	1.15
457	2017-08-01	2.19	1.62876	1.10733	-0.22	12.5818	10.141	1.16		2.19	1.62876	1.10733	-0.22	12.5818	10.141	1.16		2.19	1.62876	1.10733	-0.22	12.5818	10.141	1.16
458	2017-09-01	1.97	1.87939	1.22201	-0.42	12.5195	10.1065	1.15		1.97	1.87939	1.22201	-0.42	12.5195	10.1065	1.15		1.97	1.87939	1.22201	-0.42	12.5195	10.1065	1.15
459	2017-10-01	1.94	1.81895	2.65443	-0.52	12.5084	10.1224	1.15		1.94	1.81895	2.65443	-0.52	12.5084	10.1224	1.15		1.94	1.81895	2.65443	-0.52	12.5084	10.1224	1.15
460	2017-11-01	1.85	1.95944	3.40275	-0.42	12.3673	9.97467	1.16		1.85	1.95944	3.40275	-0.42	12.3673	9.97467	1.16		1.85	1.95944	3.40275	-0.42	12.3673	9.97467	1.16
461	2017-12-01	1.82	1.8835	2.90122	-0.52	12.3227	10.0142	1.3		1.82	1.8835	2.90122	-0.52	12.3227	10.0142	1.3		1.82	1.8835	2.90122	-0.52	12.3227	10.0142	1.3
462	2018-01-01	1.54	1.84423	2.82604	-0.52	12.1878	9.92059	1.41		1.54	1.84423	2.82604	-0.52	12.1878	9.92059	1.41		1.54	1.84423	2.82604	-0.52	12.1878	9.92059	1.41
463	2018-02-01	1.64	1.96394	3.67981	-0.52	12.0899	9.82039	1.42		1.64	1.96394	3.67981	-0.52	12.0899	9.82039	1.42		1.64	1.96394	3.67981	-0.52	12.0899	9.82039	1.42
464	2018-03-01	1.9	2.17738	3.62643	-0.62	12.0746	9.79615	1.51		1.9	2.17738	3.62643	-0.62	12.0746	9.79615	1.51		1.9	2.17738	3.62643	-0.62	12.0746	9.79615	1.51
465	2018-04-01	1.72	2.15261	3.80621	-0.72	11.8999	9.66336	1.69		1.72	2.15261	3.80621	-0.72	11.8999	9.66336	1.69		1.72	2.15261	3.80621	-0.72	11.8999	9.66336	1.69
466	2018-05-01	2	2.36512	2.95626	-0.82	11.6686	9.48509	1.7		2	2.36512	2.95626	-0.82	11.6686	9.48509	1.7		2	2.36512	2.95626	-0.82	11.6686	9.48509	1.7
467	2018-06-01	1.98	2.38428	3.53981	-0.62	11.6017	9.40158	1.82		1.98	2.38428	3.53981	-0.62	11.6017	9.40158	1.82		1.98	2.38428	3.53981	-0.62	11.6017	9.40158	1.82
468	2018-07-01	1.83	2.44038	4.12486	-0.72	11.4355	9.29314	1.91		1.83	2.44038	4.12486	-0.72	11.4355	9.29314	1.91		1.83	2.44038	4.12486	-0.72	11.4355	9.29314	1.91
469	2018-08-01	1.91	2.2786	5.42174	-0.816667	11.2634	9.17861	1.91		1.91	2.2786	5.42174	-0.816667	11.2634	9.17861	1.91		1.91	2.2786	5.42174	-0.816667	11.2634	9.17861	1.91
470	2018-09-01	1.83	2.06534	5.58289	-0.913333	11.1869	9.09044	1.95		1.83	2.06534	5.58289	-0.913333	11.1869	9.09044	1.95		1.83	2.06534	5.58289	-0.913333	11.1869	9.09044	1.95
471	2018-10-01	1.92	2.11356	4.18462	-0.81	10.9273	8.99695	2.19
Histories
		1.91476	1.86394	4.80389	-0.475	4.9271	0.792548	5.43869
		2.47738	2.44688	1.30165	0.326667	5.27526	1.28432	2.7525
		2.99667	1.28673	0.633389	2.49536	9.80565	9.56888	0.129405
		2.30206	1.63912	1.05015	-0.215	12.5307	10.1787	1.00794
Average Inflation
Dec2007-Oct2007		1.48954
Dec2007-Oct2018		1.54873

## Sheet: Post2008
No	observation_date	y1	y2	y3	y4	y5	y6	y7
1	2007-11-01	2.43	3.59924	3.2857	-0.196667	5.30845	0.678959	4.49
2	2007-12-01	2.61	3.47197	2.25865	0.106667	5.12434	0.923873	4.24
3	2008-01-01	2.87	3.3884	2.51875	0.11	4.86893	1.23282	3.94
4	2008-02-01	3.29	3.27298	1.12937	-0.00666667	4.89638	1.23872	2.98
5	2008-03-01	3.44	3.19059	0.68412	0.176667	4.18529	1.92523	2.61
6	2008-04-01	3.2	3.1403	-0.79338	0.06	3.73292	2.30931	2.28
7	2008-05-01	2.87	3.28228	-1.3936	0.453333	3.3308	2.8009	1.98
8	2008-06-01	3.08	3.81178	-1.65521	0.646667	3.19748	2.76421	2
9	2008-07-01	3.17	4.1354	-2.13142	0.84	3.21516	2.94821	2.01
10	2008-08-01	3.32	3.98108	-3.83602	1.10333	3.2281	2.89628	2
11	2008-09-01	3.46	3.66714	-8.36254	1.06667	3.23266	4.98723	1.81
12	2008-10-01	4.87	2.67195	-7.09753	1.43	3.25524	10.1976	0.97
13	2008-11-01	6.28	0.92617	-8.78269	1.69333	3.25122	11.1219	0.39
14	2008-12-01	6.18	0.12893	-11.4862	2.15667	3.30766	12.2566	0.16
15	2009-01-01	5.27	-0.11146	-13.362	2.62	3.28937	10.052	0.15
16	2009-02-01	5.06	-0.13156	-13.6336	3.09667	3.29557	10.0085	0.22
17	2009-03-01	5.71	-0.52581	-14.7946	3.47333	3.31137	11.1378	0.18
18	2009-04-01	5.23	-0.56742	-14.8321	3.75	3.83186	10.592	0.15
19	2009-05-01	4.59	-0.88936	-15.208	4.11333	4.18212	10.3133	0.18
20	2009-06-01	3.97	-1.01872	-15.3319	4.17667	4.5424	9.54371	0.21
21	2009-07-01	3.57	-1.46654	-13.9455	4.14	4.84928	9.09409	0.16
22	2009-08-01	3.18	-1.10079	-11.6128	4.2	5.15344	9.20178	0.16
23	2009-09-01	3	-1.02236	-6.91099	4.36	5.31949	9.48774	0.15
24	2009-10-01	2.88	0.01265	-7.4974	4.52	5.27957	9.45392	0.12
25	2009-11-01	3.11	1.45973	-5.93794	4.37333	5.3033	9.76491	0.12
26	2009-12-01	2.52	2.09031	-2.82117	4.32667	5.32979	10.0028	0.12
27	2010-01-01	2.62	2.30143	0.71589	4.18	5.29334	10.0212	0.11
28	2010-02-01	2.73	2.11633	1.73578	4.16667	5.28563	10.275	0.13
29	2010-03-01	2.43	2.37276	4.04669	4.25333	5.24775	10.3403	0.16		1.99653	-0.78156
30	2010-04-01	2.56	2.28156	5.28235	4.24	5.2134	10.429	0.2
31	2010-05-01	2.74	2.20753	7.88374	3.93	5.21425	10.4514	0.2
32	2010-06-01	3.26	1.56189	8.4559	3.72	5.18659	10.3724	0.18
33	2010-07-01	3.07	1.63826	7.73329	3.71	5.16057	10.2829	0.18
34	2010-08-01	3.19	1.483	6.87216	3.79667	5.21266	10.0766	0.19
35	2010-09-01	3.13	1.41921	6.30174	3.78333	5.36356	9.82634	0.19
36	2010-10-01	3.09	1.35798	5.6767	3.67	5.50437	9.57556	0.19
37	2010-11-01	3.11	1.30727	5.2972	4.06	5.93152	9.50874	0.19
38	2010-12-01	2.8	1.47677	5.97288	3.55	6.63816	9.17535	0.18
39	2011-01-01	2.67	1.55955	4.63697	3.34	7.33859	8.75192	0.17
40	2011-02-01	2.73	1.84593	3.81209	3.23333	7.97246	8.67134	0.16
41	2011-03-01	2.56	2.11144	4.16228	3.22667	8.63008	8.34293	0.14
42	2011-04-01	2.7	2.48712	3.41276	3.32	9.10429	8.22863	0.1
43	2011-05-01	2.73	2.76679	2.15899	3.21667	9.79859	8.09818	0.09
44	2011-06-01	2.57	2.78889	2.28419	3.31333	10.4612	8.07487	0.09
45	2011-07-01	2.94	2.8754	2.38844	3.21	10.5275	7.87501	0.07
46	2011-08-01	3.13	2.97592	2.65066	3.20667	10.5508	7.6748	0.1
47	2011-09-01	3.35	3.01889	2.37357	3.20333	10.701	7.62576	0.08
48	2011-10-01	3.2	2.69413	3.3586	3	10.6122	7.38465	0.07
49	2011-11-01	3.06	2.70018	3.25308	2.81	10.5894	7.23379	0.08
50	2011-12-01	3.36	2.52628	2.84899	2.72	10.5913	7.94302	0.07
51	2012-01-01	3.4	2.56932	3.57623	2.53	10.4572	7.9176	0.08
52	2012-02-01	3.16	2.51274	4.32352	2.54333	10.2827	7.8229	0.1
53	2012-03-01	3	2.2965	2.79303	2.45667	10.3984	7.57737	0.13
54	2012-04-01	3.24	1.99984	3.93707	2.47	10.3401	7.43249	0.14
55	2012-05-01	3.48	1.57628	3.90399	2.49333	10.2499	7.33769	0.16
56	2012-06-01	3.35	1.54605	3.58105	2.51667	10.3096	7.40508	0.16
57	2012-07-01	3.36	1.41023	3.30923	2.54	10.1552	7.35047	0.16
58	2012-08-01	3.34	1.51242	2.29296	2.46	10.1151	7.23981	0.13
59	2012-09-01	3.19	1.67742	2.33698	2.18	10.1116	7.09145	0.14
60	2012-10-01	2.86	1.97721	1.85781	2.2	10.1118	7.23847	0.16
61	2012-11-01	2.89	1.69922	2.42028	2.14667	10.0738	7.37022	0.16
62	2012-12-01	2.85	1.62552	2.18366	2.39333	10.0668	7.59668	0.16
63	2013-01-01	2.71	1.47398	1.52032	2.54	10.2949	7.81815	0.14
64	2013-02-01	2.96	1.61836	1.78856	2.29	10.5902	8.11753	0.15
65	2013-03-01	2.98	1.29142	2.68174	2.14	10.8246	8.49214	0.14
66	2013-04-01	2.89	1.07945	1.77917	2.29	11.0666	8.93424	0.15
67	2013-05-01	2.57	1.2591	1.65452	2.22667	11.3575	9.05419	0.11
68	2013-06-01	2.67	1.52852	1.89989	2.26333	11.5219	9.26247	0.09
69	2013-07-01	2.72	1.61821	1.12805	2.1	11.8112	9.46956	0.09
70	2013-08-01	2.64	1.43392	2.27439	2.03667	11.993	9.606	0.08
71	2013-09-01	2.83	1.16658	2.78594	2.07333	12.2093	9.90014	0.08
72	2013-10-01	2.74	1.03797	2.42171	2.11	12.4591	10.1523	0.09
73	2013-11-01	2.63	1.2643	2.23884	1.84667	12.636	10.2914	0.08
74	2013-12-01	2.34	1.48221	2.22736	1.68333	12.8955	10.6473	0.09
75	2014-01-01	2.52	1.47936	1.8115	1.62	13.1769	10.92	0.07
76	2014-02-01	2.44	1.16849	2.14451	1.75	13.3142	10.9968	0.07
77	2014-03-01	2.33	1.50461	2.72121	1.78	13.4597	11.1533	0.08
78	2014-04-01	2.23	1.78119	2.99651	1.31	13.5745	11.2383	0.09
79	2014-05-01	2.28	1.88991	3.2485	1.43333	13.6012	11.1985	0.09
80	2014-06-01	2.27	1.78508	3.39367	1.25667	13.671	11.2437	0.1
81	2014-07-01	2.15	1.81147	4.05625	1.38	13.7122	11.2537	0.09
82	2014-08-01	2.34	1.6422	3.23354	1.3	13.7022	11.1252	0.09
83	2014-09-01	2.28	1.62777	3.03222	1.12	13.8097	11.3383	0.09
84	2014-10-01	2.34	1.43037	3.19044	0.94	13.8056	11.358	0.09
85	2014-11-01	2.61	1.19453	3.69474	1.05333	13.7902	11.3401	0.09
86	2014-12-01	2.57	0.83853	3.22608	0.866667	13.8013	11.4179	0.12
87	2015-01-01	2.77	0.18284	3.08835	0.98	13.7592	11.4022	0.11
88	2015-02-01	2.51	0.28924	1.75451	0.79	13.643	11.2384	0.11
89	2015-03-01	2.6	0.28086	0.47452	0.7	13.6694	11.2312	0.11
90	2015-04-01	2.43	0.16352	-0.17366	0.71	13.5418	11.0725	0.12
91	2015-05-01	2.77	0.23028	-0.94196	0.92	13.5188	11.0064	0.12
92	2015-06-01	2.78	0.31154	-1.63108	0.63	13.4505	11.1179	0.13
93	2015-07-01	3	0.24324	-1.24724	0.54	13.4591	11.0668	0.13
94	2015-08-01	2.98	0.25684	-1.27788	0.446667	13.4417	10.9921	0.14
95	2015-09-01	3.28	0.08333	-1.94979	0.353333	13.3879	10.9964	0.14
96	2015-10-01	3.18	0.09401	-2.32339	0.36	13.3882	11.0266	0.12
97	2015-11-01	3.25	0.23182	-3.68516	0.463333	13.4338	10.999	0.12
98	2015-12-01	3.19	0.30406	-3.97509	0.366667	13.4136	11.0349	0.24
99	2016-01-01	3.51	0.82077	-2.68783	0.27	13.4064	11.008	0.34
100	2016-02-01	3.6	0.5924	-2.91825	0.273333	13.4322	11.0711	0.38
101	2016-03-01	3.35	0.63211	-3.37258	0.376667	13.2723	10.9007	0.36
102	2016-04-01	2.96	0.88718	-2.68983	0.38	13.2101	10.8048	0.37
103	2016-05-01	2.84	0.79588	-2.37	0.18	13.2293	10.7456	0.37
104	2016-06-01	3.04	0.79241	-1.67954	0.28	13.1802	10.7279	0.38
105	2016-07-01	2.76	0.75115	-2.01527	0.18	13.1894	10.7204	0.39
106	2016-08-01	2.66	0.90099	-1.98441	0.28	13.0901	10.5961	0.4
107	2016-09-01	2.71	1.22569	-1.73309	0.38	13.03	10.518	0.4
108	2016-10-01	2.54	1.46407	-1.25894	0.28	13.0677	10.56	0.4
109	2016-11-01	2.34	1.44092	-0.87898	0.08	12.9553	10.424	0.41
110	2016-12-01	2.38	1.70842	0.5066	0.08	12.9205	10.4254	0.54
111	2017-01-01	2.21	2.03667	-0.47762	0.08	12.9044	10.421	0.65
112	2017-02-01	2.28	2.18903	-0.18125	0.0766667	12.8759	10.481	0.66
113	2017-03-01	2.28	1.90083	1.16415	-0.226667	12.7916	10.4088	0.79
114	2017-04-01	2.28	1.83871	1.93311	-0.23	12.8279	10.4374	0.9
115	2017-05-01	2.34	1.65998	2.07773	-0.226667	12.7155	10.2935	0.91
116	2017-06-01	2.06	1.57715	1.78857	-0.323333	12.6541	10.2581	1.04
117	2017-07-01	2.09	1.56019	1.4461	-0.32	12.6566	10.2689	1.15
118	2017-08-01	2.19	1.62876	1.10733	-0.22	12.5818	10.141	1.16
119	2017-09-01	1.97	1.87939	1.22201	-0.42	12.5195	10.1065	1.15
120	2017-10-01	1.94	1.81895	2.65443	-0.52	12.5084	10.1224	1.15
121	2017-11-01	1.85	1.95944	3.40275	-0.42	12.3673	9.97467	1.16
122	2017-12-01	1.82	1.8835	2.90122	-0.52	12.3227	10.0142	1.3
123	2018-01-01	1.54	1.84423	2.82604	-0.52	12.1878	9.92059	1.41
124	2018-02-01	1.64	1.96394	3.67981	-0.52	12.0899	9.82039	1.42
125	2018-03-01	1.9	2.17738	3.62643	-0.62	12.0746	9.79615	1.51
126	2018-04-01	1.72	2.15261	3.80621	-0.72	11.8999	9.66336	1.69
127	2018-05-01	2	2.36512	2.95626	-0.82	11.6686	9.48509	1.7
128	2018-06-01	1.98	2.38428	3.53981	-0.62	11.6017	9.40158	1.82
129	2018-07-01	1.83	2.44038	4.12486	-0.72	11.4355	9.29314	1.91
130	2018-08-01	1.91	2.2786	5.42174	-0.816667	11.2634	9.17861	1.91
131	2018-09-01	1.83	2.06534	5.58289	-0.913333	11.1869	9.09044	1.95
132	2018-10-01	1.92	2.11356	4.18462	-0.81	10.9273	8.99695	2.19

## Sheet: WelfareGains
																														COPY FOR PAPER
VSTAR - zero policy -1pa forecast - based on inflation target equal to subsample average, subsample 2007:11 -- 2017:10										VSTAR - zero policy -1pa forecast - based on inflation target equal to subsample average, subsample 2007:11 - 2018:10										VSTAR - zero policy -1pa forecast - based on inflation target equal to subsample average, subsample 2007:11 - 2017:11										VSTAR - zero policy -1pa forecast - based on inflation target equal to subsample average, subsample 2007:11 - 2017:11
	p	u	DR	DTS	DPS	Loss	Gain	unem eq			p	u	DR	DTS	DPS	Loss	Gain	unem eq			p	u	DR	DTS	DPS	Loss	Gain	unem eq			p	u	DR	DTS	DPS	Loss	Gain	unem eq
Benchmark										Benchmark										Benchmark										Benchmark
No-Policy	2.0163	5.24881	0.0237382	1.67132e-31	1.67132e-33	7.28885				No-Policy	4.74875	6.72917	0.0223054	1.51704e-31	1.51704e-33	11.5002				No-Policy	2.47095	5.55098	0.0233705	1.64346e-31	1.64346e-33	8.0453
Act-Policy	1.25531	5.54996	0.0227576	0.0513492	0.382718	7.2621	0.367051	0.163566		Act-Policy	1.16692	5.04802	0.0216763	0.0483074	0.345813	6.63074	42.3425	2.20669		Act-Policy	1.23656	5.46192	0.0223792	0.0506605	0.376523	7.14804	11.1526	0.947236		Act-Policy	1.23656	5.46192	0.0223792	0.0506605	0.376523	7.14804
Opt-Policy	1.06538	5.42061	0.0550949	0.251214	0.398448	7.19074	0.982626	0.267132		Opt-Policy	0.982029	4.97036	0.051329	0.230223	0.365336	6.59927	0.474547	0.177387		Opt-Policy	1.04858	5.33485	0.0543552	0.247965	0.392551	7.07831	0.9756	0.264076		Opt-Policy	1.04858	5.33485	0.0543552	0.247965	0.392551	7.07831	0.9756	0.264076
(VAR)							100	2.69483		(VAR)							100	2.57502		(VAR)										No-Policy	2.47095	5.55098	0.0233705	1.64346e-31	1.64346e-33	8.0453	11.1526	0.947236
vp=0.5										vp=0.5										vp=0.5										vp=0.5
No-Policy	2.0163	5.24881	0.0237382	1.67132e-31	1.67132e-33	6.2807				No-Policy	4.74875	6.72917	0.0223054	1.51704e-31	1.51704e-33	9.12585				No-Policy	2.47095	5.55098	0.0233705	1.64346e-31	1.64346e-33	6.80982
Act-Policy	1.25531	5.54996	0.0227576	0.0513492	0.382718	6.63444	-5.63217	#NUM!		Act-Policy	1.16692	5.04802	0.0216763	0.0483074	0.345813	6.04728	33.7346	1.75459		Act-Policy	1.23656	5.46192	0.0223792	0.0506605	0.376523	6.52976	4.11265	0.529211		Act-Policy	1.23656	5.46192	0.0223792	0.0506605	0.376523	6.52976
Opt-Policy	1.15935	5.37237	0.0559128	0.191463	0.37941	6.57883	0.838166	0.235813		Opt-Policy	1.07523	4.91597	0.0520976	0.175322	0.347933	6.02894	0.303241	0.135417		Opt-Policy	1.14155	5.28656	0.0551724	0.188678	0.373672	6.47486	0.84077	0.234308		Opt-Policy	1.14155	5.28656	0.0551724	0.188678	0.373672	6.47486	0.84077	0.234308
(VAR)							100	2.57574		(VAR)							100	2.45912		(VAR)										No-Policy	2.47095	5.55098	0.0233705	1.64346e-31	1.64346e-33	6.80982	4.11265	0.529211
vug=0.5										vug=0.5										vug=0.5										vug=0.5
No-Policy	2.0163	5.24881	0.0237382	1.67132e-31	1.67132e-33	4.66445				No-Policy	4.74875	6.72917	0.0223054	1.51704e-31	1.51704e-33	8.13564				No-Policy	2.47095	5.55098	0.0233705	1.64346e-31	1.64346e-33	5.26981
Act-Policy	1.25531	5.54996	0.0227576	0.0513492	0.382718	4.48712	3.80168	0.595529		Act-Policy	1.16692	5.04802	0.0216763	0.0483074	0.345813	4.10673	49.5217	2.83863		Act-Policy	1.23656	5.46192	0.0223792	0.0506605	0.376523	4.41708	16.1813	1.30593		Act-Policy	1.23656	5.46192	0.0223792	0.0506605	0.376523	4.41708
Opt-Policy	1.04708	5.49056	0.049263	0.226606	0.388595	4.45682	0.675127	0.246145		Opt-Policy	0.961861	5.04491	0.0459454	0.208111	0.355473	4.09385	0.313675	0.16051		Opt-Policy	1.03035	5.40455	0.0485628	0.223948	0.38256	4.3877	0.665322	0.242437		Opt-Policy	1.03035	5.40455	0.0485628	0.223948	0.38256	4.3877	0.665322	0.242437
(VAR)							100	2.9957		(VAR)							100	2.86591		(VAR)										No-Policy	2.47095	5.55098	0.0233705	1.64346e-31	1.64346e-33	5.26981	16.1813	1.30593
Dv R,TS,PS=0.5										Dv R,TS,PS=0.5										Dv R,TS,PS=0.5										Dv R,TS,PS=0.5
No-Policy	2.0163	5.24881	0.0237382	1.67132e-31	1.67132e-33	7.27698				No-Policy	4.74875	6.72917	0.0223054	1.51704e-31	1.51704e-33	11.4891				No-Policy	2.47095	5.55098	0.0233705	1.64346e-31	1.64346e-33	8.03361
Act-Policy	1.25531	5.54996	0.0227576	0.0513492	0.382718	7.03369	3.34338	0.493251		Act-Policy	1.16692	5.04802	0.0216763	0.0483074	0.345813	6.42284	44.0961	2.25083		Act-Policy	1.23656	5.46192	0.0223792	0.0506605	0.376523	6.92326	13.8213	1.05373		Act-Policy	1.23656	5.46192	0.0223792	0.0506605	0.376523	6.92326
Opt-Policy	0.988047	5.36331	0.0614051	0.389858	0.467977	6.81097	3.16638	0.471925		Opt-Policy	0.909716	4.91681	0.0571846	0.356734	0.430053	6.24851	2.7142	0.417527		Opt-Policy	0.972414	5.27833	0.0605894	0.384815	0.461692	6.70429	3.16283	0.467943		Opt-Policy	0.972414	5.27833	0.0605894	0.384815	0.461692	6.70429	3.16283	0.467943
(VAR)							100	2.65211		(VAR)							100	2.53433		(VAR)										No-Policy	2.47095	5.55098	0.0233705	1.64346e-31	1.64346e-33	8.03361	13.8213	1.05373
Dv TS,PS=0.5										Dv TS,PS=0.5										Dv TS,PS=0.5										Dv TS,PS=0.5
No-Policy	2.0163	5.24881	0.0237382	1.67132e-31	1.67132e-33	7.28885				No-Policy	4.74875	6.72917	0.0223054	1.51704e-31	1.51704e-33	11.5002				No-Policy	2.47095	5.55098	0.0233705	1.64346e-31	1.64346e-33	8.03361
Act-Policy	1.25531	5.54996	0.0227576	0.0513492	0.382718	7.04506	3.34466	0.493748		Act-Policy	1.16692	5.04802	0.0216763	0.0483074	0.345813	6.43368	44.056	2.2509		Act-Policy	1.23656	5.46192	0.0223792	0.0506605	0.376523	6.92326	13.8213	1.05373		Act-Policy	1.23656	5.46192	0.0223792	0.0506605	0.376523	6.92326
Opt-Policy	0.995145	5.38875	0.0465105	0.383308	0.473338	6.85873	2.6449	0.431665		Opt-Policy	0.917682	4.93983	0.0432889	0.350762	0.435265	6.29382	2.17391	0.373982		Opt-Policy	0.972414	5.27833	0.0605894	0.384815	0.461692	6.70429	3.16283	0.467943		Opt-Policy	0.972414	5.27833	0.0605894	0.384815	0.461692	6.70429	3.16283	0.467943
(VAR)							100	2.65425		(VAR)							100	2.53647		(VAR)										No-Policy	2.47095	5.55098	0.0233705	1.64346e-31	1.64346e-33	8.03361	13.8213	1.05373
Dv R=0.5										Dv R=0.5										Dv R=0.5										Dv R=0.5
No-Policy	2.0163	5.24881	0.0237382	1.67132e-31	1.67132e-33	7.28885				No-Policy	4.74875	6.72917	0.0223054	1.51704e-31	1.51704e-33	11.4891				No-Policy	2.47095	5.55098	0.0233705	1.64346e-31	1.64346e-33	8.03361
Act-Policy	1.25531	5.54996	0.0227576	0.0513492	0.382718	7.04506	3.34466	0.493748		Act-Policy	1.16692	5.04802	0.0216763	0.0483074	0.345813	6.6199	42.3809	2.20662		Act-Policy	1.23656	5.46192	0.0223792	0.0506605	0.376523	7.13685	11.1626	0.946975		Act-Policy	1.23656	5.46192	0.0223792	0.0506605	0.376523	7.13685
Opt-Policy	0.995145	5.38875	0.0465105	0.383308	0.473338	6.85873	2.6449	0.431665		Opt-Policy	0.976425	4.95174	0.0616129	0.231222	0.365929	6.55612	0.963406	0.25254		Opt-Policy	1.04387	5.31502	0.0651596	0.249085	0.393299	7.03386	1.44314	0.320928		Opt-Policy	1.04387	5.31502	0.0651596	0.249085	0.393299	7.03386	1.44314	0.320928
(VAR)							100	2.65425		(VAR)							100	2.57292		(VAR)										No-Policy	2.47095	5.55098	0.0233705	1.64346e-31	1.64346e-33	8.03361	11.1626	0.946975
AVERAGE										AVERAGE										AVERAGE										AVERAGE
No-Policy	2.0163	5.24881	0.0237382	1.67132e-31	1.67132e-33	6.68145				No-Policy	4.74875	6.72917	0.0223054	1.51704e-31	1.51704e-33	10.54				No-Policy	2.47095	5.55098	0.0233705	1.64346e-31	1.64346e-33	7.37096
Act-Policy	1.25531	5.54996	0.0227576	0.0513492	0.382718	6.58458	1.42821	#NUM!		Act-Policy	1.16692	5.04802	0.0216763	0.0483074	0.345813	6.04353	42.6886	2.25137		Act-Policy	1.23656	5.46192	0.0223792	0.0506605	0.376523	6.51304	11.7086	0.972803		Act-Policy	1.23656	5.46192	0.0223792	0.0506605	0.376523	6.51304
Opt-Policy	1.04169	5.40406	0.0524495	0.304293	0.430184	6.45914	1.82535	0.347391		Opt-Policy	0.97049	4.9566	0.0519097	0.258729	0.383331	5.97009	1.15716	0.252894		Opt-Policy	1.03486	5.31627	0.0574048	0.279884	0.410911	6.39722	1.70841	0.332939		Opt-Policy	1.03486	5.31627	0.0574048	0.279884	0.410911	6.39722	1.70841	0.332939
(VAR)							100	2.70448		(VAR)							100	2.59063		(VAR)										No-Policy	2.47095	5.55098	0.0233705	1.64346e-31	1.64346e-33	7.37096	11.7086	0.972803

## Sheet: ZLBduration
	Actual data	Optimal (2%)	Optimal (3%)	Optimal (4%)		Duration
	4.49	4.49	4.49	4.49		0	0	0	0
2007-12-01	4.24	4.0868	4.33536	4.58391		0	0	0	0
2008-01-01	3.94	3.73508	4.09703	4.45897		0	0	0	0
2008-02-01	2.98	3.51902	3.81809	4.11716		0	0	0	0
2008-03-01	2.61	2.57306	2.81279	3.05252		0	0	0	0
2008-04-01	2.28	1.65129	2.1966	2.74191		0	0	0	0
2008-05-01	1.98	1.35135	1.85569	2.36003		0	0	0	0
2008-06-01	2	0.897318	1.36842	1.83953		0	0	0	0
2008-07-01	2.01	0.968282	1.28488	1.60148		0	0	0	0
2008-08-01	2	1.19278	1.37663	1.56048		0	0	0	0
2008-09-01	1.81	1.60043	1.64288	1.68533		0	0	0	0
2008-10-01	0.97	1.2656	1.30226	1.33892		0	0	0	0
2008-11-01	0.39	0	0	0		0	1	1	1
2008-12-01	0.16	0	0	0		1	1	1	1
2009-01-01	0.15	0.215476	0	0		1	1	1	1
2009-02-01	0.22	0.230878	0	0		1	1	1	1
2009-03-01	0.18	0	0	0		1	1	1	1
2009-04-01	0.15	0	0	0		1	1	1	1
2009-05-01	0.18	0.0130794	0	0		1	1	1	1
2009-06-01	0.21	0	0	0		1	1	1	1
2009-07-01	0.16	0	0	0		1	1	1	1
2009-08-01	0.16	0.0634702	0	0		1	1	1	1
2009-09-01	0.15	0.134357	0	0		1	1	1	1
2009-10-01	0.12	0.212345	0.00647931	0		1	1	1	1
2009-11-01	0.12	0.370165	0.174258	0		1	0	1	1
2009-12-01	0.12	0.47321	0.272484	0.0717576		1	0	0	1
2010-01-01	0.11	0.590282	0.387944	0.185605		1	0	0	1
2010-02-01	0.13	0.667166	0.461085	0.255003		1	0	0	0
2010-03-01	0.16	0.60452	0.39473	0.18494		1	0	0	1
2010-04-01	0.2	0.614913	0.403551	0.192189		1	0	0	1
2010-05-01	0.2	0.536859	0.31831	0.0997609		1	0	0	1
2010-06-01	0.18	0.540908	0.309144	0.07738		1	0	0	1
2010-07-01	0.18	0.475326	0.237044	0		1	0	1	1
2010-08-01	0.19	0.497763	0.258972	0.0201801		1	0	0	1
2010-09-01	0.19	0.458182	0.221889	0		1	0	1	1
2010-10-01	0.19	0.459863	0.222911	0		1	0	1	1
2010-11-01	0.19	0.456702	0.213967	0		1	0	1	1
2010-12-01	0.18	0.450409	0.226206	0.00200243		1	0	1	1
2011-01-01	0.17	0.486938	0.239611	0		1	0	1	1
2011-02-01	0.16	0.50296	0.245262	0		1	0	1	1
2011-03-01	0.14	0.525741	0.263276	0.00081163		1	0	0	1
2011-04-01	0.1	0.591089	0.332179	0.0732702		1	0	0	1
2011-05-01	0.09	0.658998	0.413658	0.168318		1	0	0	1
2011-06-01	0.09	0.670911	0.421164	0.171416		1	0	0	1
2011-07-01	0.07	0.643959	0.400119	0.156279		1	0	0	1
2011-08-01	0.1	0.658773	0.412463	0.166152		1	0	0	1
2011-09-01	0.08	0.642585	0.390263	0.137942		1	0	0	1
2011-10-01	0.07	0.641569	0.392917	0.144265		1	0	0	1
2011-11-01	0.08	0.641764	0.381612	0.121459		1	0	0	1
2011-12-01	0.07	0.653909	0.377704	0.1015		1	0	0	1
2012-01-01	0.08	0.595677	0.31445	0.0332234		1	0	0	1
2012-02-01	0.1	0.60112	0.301588	0.00205581		1	0	0	1
2012-03-01	0.13	0.59414	0.291386	0		1	0	0	1
2012-04-01	0.14	0.535878	0.218472	0		1	0	1	1
2012-05-01	0.16	0.449696	0.131289	0		1	0	1	1
2012-06-01	0.16	0.333479	0.0127514	0		1	0	1	1
2012-07-01	0.16	0.334145	0.015594	0		1	0	1	1
2012-08-01	0.13	0.319678	0.00327947	0		1	0	1	1
2012-09-01	0.14	0.380285	0.0631922	0		1	0	1	1
2012-10-01	0.16	0.387348	0.0397185	0		1	0	1	1
2012-11-01	0.16	0.464067	0.113816	0		1	0	1	1
2012-12-01	0.16	0.378987	0.0229031	0		1	0	1	1
2013-01-01	0.14	0.38533	0.0549984	0		1	0	1	1
2013-02-01	0.15	0.381659	0.0697273	0		1	0	1	1
2013-03-01	0.14	0.335429	0	0		1	0	1	1
2013-04-01	0.15	0.21811	0	0		1	1	1	1
2013-05-01	0.11	0.160235	0	0		1	1	1	1
2013-06-01	0.09	0.257186	0	0		1	0	1	1
2013-07-01	0.09	0.328292	0.00116154	0		1	0	1	1
2013-08-01	0.08	0.324001	0	0		1	0	1	1
2013-09-01	0.08	0.266973	0	0		1	0	1	1
2013-10-01	0.09	0.169314	0	0		1	1	1	1
2013-11-01	0.08	0.11432	0	0		1	1	1	1
2013-12-01	0.09	0.157565	0	0		1	1	1	1
2014-01-01	0.07	0.180367	0	0		1	1	1	1
2014-02-01	0.07	0.0771286	0	0		1	1	1	1
2014-03-01	0.08	0.104404	0	0		1	1	1	1
2014-04-01	0.09	0.164759	0	0		1	1	1	1
2014-05-01	0.09	0	0	0		1	1	1	1
2014-06-01	0.1	0	0	0		1	1	1	1
2014-07-01	0.09	0	0	0		1	1	1	1
2014-08-01	0.09	0	0	0		1	1	1	1
2014-09-01	0.09	0	0	0		1	1	1	1
2014-10-01	0.09	0.383421	0	0		1	0	1	1
2014-11-01	0.09	0.693741	0.96052	1.2273		1	0	0	0
2014-12-01	0.12	0.655555	0.530995	0.406435		1	0	0	0
2015-01-01	0.11	0.806342	1.13583	1.46532		1	0	0	0
2015-02-01	0.11	0.927402	1.13377	1.34015		1	0	0	0
2015-03-01	0.11	0.692352	1.0153	1.33824		1	0	0	0
2015-04-01	0.12	0.553374	0.862479	1.17158		1	0	0	0
2015-05-01	0.12	0.608229	0.921412	1.23459		1	0	0	0
2015-06-01	0.13	0.84956	1.15793	1.46631		1	0	0	0
2015-07-01	0.13	0.454283	0.758352	1.06242		1	0	0	0
2015-08-01	0.14	0.482492	0.77958	1.07667		1	0	0	0
2015-09-01	0.14	0.507259	0.80559	1.10392		1	0	0	0
2015-10-01	0.12	0.566929	0.879002	1.19107		1	0	0	0
2015-11-01	0.12	0.48019	0.785555	1.09092		1	0	0	0
2015-12-01	0.24	0.337953	0.631229	0.924504		1	0	0	0
2016-01-01	0.34	0.602586	0.933452	1.26432		0	0	0	0
2016-02-01	0.38	0.797333	1.18155	1.56578		0	0	0	0
2016-03-01	0.36	0.974425	1.36772	1.76102		0	0	0	0
2016-04-01	0.37	0.822252	1.17753	1.5328		0	0	0	0
2016-05-01	0.37	0.777161	1.13417	1.49118		0	0	0	0
2016-06-01	0.38	0.816314	1.22164	1.62696		0	0	0	0
2016-07-01	0.39	0.947447	1.33933	1.73122		0	0	0	0
2016-08-01	0.4	0.893221	1.30333	1.71345		0	0	0	0
2016-09-01	0.4	0.915191	1.31183	1.70848		0	0	0	0
2016-10-01	0.4	0.772247	1.1358	1.49935		0	0	0	0
2016-11-01	0.41	0.729414	1.12606	1.5227		0	0	0	0
2016-12-01	0.54	0.60928	1.03273	1.45617		0	0	0	0
2017-01-01	0.65	0.80786	1.26287	1.71789		0	0	0	0
2017-02-01	0.66	0.757278	1.23772	1.71817		0	0	0	0
2017-03-01	0.79	0.709424	1.1924	1.67538		0	0	0	0
2017-04-01	0.9	0.936321	0.905865	0.875409		0	0	0	0
2017-05-01	0.91	1.04122	1.04413	1.04703		0	0	0	0
2017-06-01	1.04	1.06384	1.07619	1.08854		0	0	0	0
2017-07-01	1.15	1.24101	1.1629	1.08479		0	0	0	0
2017-08-01	1.16	1.37253	1.31849	1.26446		0	0	0	0
2017-09-01	1.15	1.39988	1.48406	1.56823		0	0	0	0
2017-10-01	1.15	1.45771	1.35595	1.25419		0	0	0	0
2017-11-01	1.16	1.49207	1.38527	1.27848
2017-12-01		1.49236	1.39245	1.29254
2018-01-01		1.68446	1.60502	1.52558		85	26	51	71
2018-02-01		1.82059	1.75707	1.69356
2018-03-01		1.85707	1.79483	1.73259
2018-04-01		1.99185	1.95603	1.9202
2018-05-01		2.21454	2.21145	2.20837
2018-06-01		2.22257	2.23918	2.2558
2018-07-01		2.37414	2.35723	2.34032
2018-08-01		2.49453	2.49712	2.49971
2018-09-01		2.51652	2.53504	2.55355
2018-10-01

## Sheet: BalanceSheetDecomp
Actual						0.02
	2.01509	5.09761	-0.484	3.69041			4.04446	3.51797	-0.655692	1.36783
	5.35311	-1.75147	-0.078117	4.1182			7.37381	-1.83356	-1.50844	5.67651
	7.3682	3.34614	-0.562117	7.80862	17.9608		11.4183	1.68442	-2.16413	7.04434	17.9829
0.03						0.04
	3.96557	3.54091	-0.706642	0.956836			3.88667	3.56384	-0.757592	0.545841
	8.05723	-1.82104	-1.63434	6.29867			8.74065	-1.80852	-1.76025	6.92084
	12.0228	1.71987	-2.34099	7.25551	18.6572		12.6273	1.75532	-2.51784	7.46668	19.3315

## Sheet: AlternativeOptimizations
VSTAR - 1pa forecast Model Predictive Control -post 2008 based on inflation target equal topost 2008											VSTAR - 1pa forecast Nonlinear Numerical Control -post 2008 based on inflation target equal topost 2008											VAR - 1pa forecast post 2008 based on inflation target equal topost 2008																										TABLE AVERAGE GAINS UNDER ALTERNATIVE METHODS
	Terms in the loss function					Loss	Stabilization					Terms in the loss function					Loss	Stabilization					Terms in the loss function					Loss	Stabilization																				p
	p	u	DR	DTS	DPS		Gain	unem eq				p	u	DR	DTS	DPS		Gain	unem eq				p	u	DR	DTS	DPS		Gain	unem eq			Trial	1	2	3	4	5	6	7	8	9	10	Average				Sample	post 2008
Policy	Benchmark										Policy	Benchmark										Policy	Benchmark											2008-2018														Actual	1.23656
Act-Policy	1.23656	5.46192	0.0223792	0.0506605	0.376523	7.14804					Act-Policy	1.23656	5.46192	0.0223792	0.0506605	0.376523	7.14804					Act-Policy	1.23656	5.46192	0.0223792	0.0506605	0.376523	7.14804					SDC	0.573994	0.462747	0.527546	0.462193	0.523975	0.486408	0.460393	0.466931	0.465676	0.508024	0.493789				Optimal
Opt-Policy	1.13611	5.44365	0.0822372	0.0503779	0.376024	7.0884	0.834409	0.244221			Opt-Policy	1.13611	5.44365	0.0752833	0.050378	0.376023	7.08144	0.931693	0.258065			Opt-Policy	1.03477	5.13494	0.0476103	0.0446631	0.305557	6.56754	8.1212	0.76191			LIN	0.559245	0.498222	0.491797	0.489793	0.484874	0.519779	0.495214	0.491259	0.51959	0.48325	0.503302				SDC	1.03486
	vp=0.5											vp=0.5											vp=0.5										MPC	6.67951	6.45173	6.49819	6.87657	6.58165	6.56696	6.52	6.57438	6.53117	6.5241	6.58042				LIN	1.02111
Act-Policy	1.23656	5.46192	0.0223792	0.0506605	0.376523	6.52976					Act-Policy	1.23656	5.46192	0.0223792	0.0506605	0.376523	6.52976					Act-Policy	1.23656	5.46192	0.0223792	0.0506605	0.376523	6.52976					NS	4.4356	4.37838	4.28788	4.40912	4.37998	4.52843	4.42108	4.494	4.29828	4.36162	4.39944				MPC	1.13611
Opt-Policy	1.13611	5.44365	0.0822372	0.0503778	0.376024	6.52034	0.144207	0.0970381			Opt-Policy	1.13611	5.44365	0.0752833	0.050378	0.376023	6.51339	0.250704	0.127947			Opt-Policy	1.11368	5.15108	0.0408479	0.0447662	0.281136	6.07467	6.96955	0.674607				1978-2018														DNS	1.13611
	vug=0.5											vug=0.5											vug=0.5										SDC	1.49871	1.47032	1.62576	1.50097	1.63682	1.48405	1.51835	1.49416	1.53102	1.63038	1.53905				Sample	whole
Act-Policy	1.23656	5.46192	0.0223792	0.0506605	0.376523	4.41708					Act-Policy	1.23656	5.46192	0.0223792	0.0506605	0.376523	4.41708					Act-Policy	1.23656	5.46192	0.0223792	0.0506605	0.376523	4.41708					LIN	1.67012	1.77398	1.87185	1.85065	1.72953	1.77798	1.69049	1.85619	1.70087	1.76286	1.76845				Actual	4.75037
Opt-Policy	1.13611	5.44365	0.0822372	0.0503778	0.376024	4.36657	1.14355	0.317841			Opt-Policy	1.13611	5.44365	0.0752833	0.050378	0.376023	4.35962	1.30098	0.339015			Opt-Policy	1.01705	5.23909	0.0409818	0.0441101	0.313669	4.03536	8.64207	0.873759			MPC	21.3599	21.7464	21.6534	21.8892	21.6669	21.8221	21.39	21.2412	21.5345	21.6118	21.5915				Optimal
	Dv R,TS,PS=0.5											Dv R,TS,PS=0.5											Dv R,TS,PS=0.5										NS	15.394	15.4496	15.364	15.5902	15.1227	15.5639	15.5167	15.2635	15.326	14.9181	15.3509				SDC	3.40162
Act-Policy	1.23656	5.46192	0.0223792	0.0506605	0.376523	6.92326					Act-Policy	1.23656	5.46192	0.0223792	0.0506605	0.376523	6.92326					Act-Policy	1.23656	5.46192	0.0223792	0.0506605	0.376523	6.92326																				LIN	3.91497
Opt-Policy	1.13611	5.44365	0.0822372	0.0503778	0.376024	6.83408	1.28815	0.298633			Opt-Policy	1.13611	5.44365	0.0752833	0.050378	0.376023	6.8306	1.33837	0.304399			Opt-Policy	0.961744	4.96755	0.0661182	0.0482944	0.358045	6.16552	10.9448	0.870481																		MPC	4.62007
	Dv TS,PS=0.5											Dv TS,PS=0.5											Dv TS,PS=0.5																									DNS	4.62007
Act-Policy	1.23656	5.46192	0.0223792	0.0506605	0.376523	6.93445					Act-Policy	1.23656	5.46192	0.0223792	0.0506605	0.376523	6.93445					Act-Policy	1.23656	5.46192	0.0223792	0.0506605	0.376523	6.93445
Opt-Policy	1.13611	5.44365	0.0813408	0.050378	0.376023	6.8743	0.867398	0.245254			Opt-Policy	1.13611	5.44365	0.0752833	0.050378	0.376023	6.86824	0.95475	0.257307			Opt-Policy	0.95924	5.11543	0.0403246	0.0506807	0.363953	6.32232	8.82745	0.782391
	Dv R=0.5											Dv R=0.5											Dv R=0.5
Act-Policy	1.23656	5.46192	0.0223792	0.0506605	0.376523	7.13685					Act-Policy	1.23656	5.46192	0.0223792	0.0506605	0.376523	7.13685					Act-Policy	1.23656	5.46192	0.0223792	0.0506605	0.376523	7.13685
Opt-Policy	1.13611	5.44365	0.0794716	0.050378	0.376023	7.0459	1.27445	0.301589			Opt-Policy	1.13611	5.44365	0.0752833	0.050378	0.376023	7.0438	1.30379	0.305041			Opt-Policy	1.04018	4.98648	0.077526	0.0454444	0.302699	6.41357	10.1345	0.850459
	AVERAGE											AVERAGE											AVERAGE
Act-Policy	1.23656	5.46192	0.0223792	0.0506605	0.376523	6.51491					Act-Policy	1.23656	5.46192	0.0223792	0.0506605	0.376523	6.51491					Act-Policy	1.23656	5.46192	0.0223792	0.0506605	0.376523	6.51491
Opt-Policy	1.13611	5.44365	0.0816269	0.0503779	0.376024	6.45493	0.925361	0.250763			Opt-Policy	1.13611	5.44365	0.0752833	0.050378	0.376023	6.44952	1.01338	0.265296			Opt-Policy	1.02111	5.09909	0.0522348	0.0463265	0.320843	5.92983	8.93992	0.802268
VSTAR - 1pa forecast Model Predictive Control full sample based on inflation target equal to sample average											VSTAR - 1pa forecast Nonlinear Numerical Control full sample based on inflation target equal to sample average											VAR - 1pa forecast full sample based on inflation target equal to sample average											VSTAR - 1pa forecast full sample based on inflation target equal to sample average
	Terms in the loss function					Loss	Stabilization					Terms in the loss function					Loss	Stabilization					Terms in the loss function					Loss	Stabilization					Terms in the loss function					Loss	Stabilization
	p	u	DR	DTS	DPS		Gain	unem eq				p	u	DR	DTS	DPS		Gain	unem eq				p	u	DR	DTS	DPS		Gain	unem eq				p	u	DR	DTS	DPS		Gain	unem eq
Policy	Benchmark										Benchmark											Benchmark											Benchmark
Act-Policy	4.75037	2.65521	0.319868	0.019123	0.106717	7.85129					Act-Policy	4.75037	2.65521	0.319868	0.019123	0.106717	7.85129					Act-Policy	4.75037	2.65521	0.319868	0.019123	0.106717	7.85129					Act-Policy	4.75037	2.65521	0.319868	0.019123	0.106717	7.85129
Opt-Policy	4.62007	2.64037	0.300593	0.0191229	0.106716	7.68687	2.09421	0.405491			Opt-Policy	4.62007	2.64037	0.457393	0.019123	0.106716	7.84367	0.0970953	0.0873111			Opt-Policy	3.98225	2.49556	0.302613	0.0214358	0.166665	6.96852	11.2436	0.939556			Opt-Policy	3.46824	2.40072	0.353691	0.119833	0.183403	6.52589	16.8814	1.15126
	vp=0.5											vp=0.5											vp=0.5											vp=0.5
Act-Policy	4.75037	2.65521	0.319868	0.019123	0.106717	5.4761					Act-Policy	4.75037	2.65521	0.319868	0.019123	0.106717	5.4761					Act-Policy	4.75037	2.65521	0.319868	0.019123	0.106717	5.4761					Act-Policy	4.75037	2.65521	0.319868	0.019123	0.106717	5.4761
Opt-Policy	4.62007	2.64037	0.300593	0.0191229	0.106716	5.37683	1.81279	0.315071			Opt-Policy	4.62007	2.64037	0.457393	0.019123	0.106716	5.53363	-1.05056	#NUM!			Opt-Policy	4.31303	2.50338	0.298142	0.0221736	0.120268	5.10048	6.8594	0.612885			Opt-Policy	3.81214	2.35101	0.348737	0.0862364	0.146389	4.83845	11.6444	0.798535
	vug=0.5											vug=0.5											vug=0.5											vug=0.5
Act-Policy	4.75037	2.65521	0.319868	0.019123	0.106717	6.52369					Act-Policy	4.75037	2.65521	0.319868	0.019123	0.106717	6.52369					Act-Policy	4.75037	2.65521	0.319868	0.019123	0.106717	6.52369					Act-Policy	4.75037	2.65521	0.319868	0.019123	0.106717	6.52369
Opt-Policy	4.62007	2.64037	0.300593	0.0191229	0.106716	6.36668	2.40665	0.560361			Opt-Policy	4.62007	2.64037	0.457393	0.019123	0.106716	6.52348	0.00310688	0.0201337			Opt-Policy	3.88339	2.54681	0.299087	0.0190658	0.170826	5.64578	13.4573	1.32507			Opt-Policy	3.44356	2.51569	0.353748	0.110097	0.179488	5.34474	18.0718	1.53554							Trial	SDC
	Dv R,TS,PS=0.5											Dv R,TS,PS=0.5											Dv R,TS,PS=0.5											Dv R,TS,PS=0.5														1	0.573994
Act-Policy	4.75037	2.65521	0.319868	0.019123	0.106717	7.62844					Act-Policy	4.75037	2.65521	0.319868	0.019123	0.106717	7.62844					Act-Policy	4.75037	2.65521	0.319868	0.019123	0.106717	7.62844					Act-Policy	4.75037	2.65521	0.319868	0.019123	0.106717	7.62844									2	0.462747
Opt-Policy	4.62007	2.64037	0.300593	0.0191229	0.106716	7.47365	2.02905	0.393427			Opt-Policy	4.62007	2.64037	0.457393	0.019123	0.106716	7.55205	1.00132	0.276378			Opt-Policy	3.65691	2.41381	0.315864	0.025838	0.256636	6.3699	16.498	1.12185			Opt-Policy	3.11295	2.30988	0.363735	0.191469	0.261828	5.83134	23.5578	1.34056							3	0.527546
	Dv TS,PS=0.5											Dv TS,PS=0.5											Dv TS,PS=0.5											Dv TS,PS=0.5														4	0.462193
Act-Policy	4.75037	2.65521	0.319868	0.019123	0.106717	7.78837					Act-Policy	4.75037	2.65521	0.319868	0.019123	0.106717	7.78837					Act-Policy	4.75037	2.65521	0.319868	0.019123	0.106717	7.78837					Act-Policy	4.75037	2.65521	0.319868	0.019123	0.106717	7.78837									5	0.523975
Opt-Policy	4.62007	2.64037	0.310087	0.019123	0.106716	7.63344	1.98922	0.393609			Opt-Policy	4.62007	2.64037	0.457393	0.019123	0.106716	7.78075	0.0978708	0.0873072			Opt-Policy	3.65249	2.48567	0.301721	0.0319771	0.263961	6.58785	15.4142	1.09568			Opt-Policy	3.12234	2.31602	0.352925	0.191472	0.260328	6.01718	22.7414	1.33086							6	0.486408
	Dv R=0.5											Dv R=0.5											Dv R=0.5											Dv R=0.5														7	0.460393
Act-Policy	4.75037	2.65521	0.319868	0.019123	0.106717	7.69136					Act-Policy	4.75037	2.65521	0.319868	0.019123	0.106717	7.69136					Act-Policy	4.75037	2.65521	0.319868	0.019123	0.106717	7.69136					Act-Policy	4.75037	2.65521	0.319868	0.019123	0.106717	7.69136									8	0.466931
Opt-Policy	4.62007	2.64037	0.299571	0.019123	0.106716	7.53606	2.0191	0.394077			Opt-Policy	4.62007	2.64037	0.457393	0.019123	0.106716	7.61497	0.993134	0.276379			Opt-Policy	4.00177	2.42325	0.322326	0.0204558	0.162878	6.76951	11.9854	0.960126			Opt-Policy	3.45049	2.39829	0.366891	0.119259	0.185626	6.33711	17.6073	1.16372							9	0.465676
	AVERAGE											AVERAGE											AVERAGE											AVERAGE														10	0.508024
Act-Policy	4.75037	2.65521	0.319868	0.019123	0.106717	7.15987					Act-Policy	4.75037	2.65521	0.319868	0.019123	0.106717	7.15987					Act-Policy	4.75037	2.65521	0.319868	0.019123	0.106717	7.15987					Act-Policy	4.75037	2.65521	0.319868	0.019123	0.106717	7.15987									Average	0.493789
Opt-Policy	4.62007	2.64037	0.302005	0.019123	0.106716	7.01226	2.0585	0.410339			Opt-Policy	4.62007	2.64037	0.457393	0.019123	0.106716	7.14143	0.190328	#NUM!			Opt-Policy	3.91497	2.47808	0.306625	0.023491	0.190206	6.24034	12.5763	1.00919			Opt-Policy	3.40162	2.38194	0.356621	0.136394	0.202844	5.81578	18.4174	1.22008
[truncated: 8 more columns]

## Sheet: ProfFore
Deviation	s	p	ip	ug	R
PF	0.178267	0.679807	2.75248	0.123133	0.11681
Optimal(2)	0.590447	0.179944	1.78486	0.0478248	0.322717
Optimal(3)	0.561508	0.356138	2.1078	0.0827511	0.313421
Optimal(4)	0.591805	0.603797	2.44658	0.139235	0.377168
1.5487
Ben	0.629932	0.163324	1.78539	0.0458695	0.358917
W2	0.6734	0.163824	1.81332	0.0483975	0.379548
W3	0.442351	0.161872	1.2919	0.0376665	0.288332
W4	0.843779	0.190703	2.40096	0.0584074	0.449247
W5	0.777168	0.164007	2.27626	0.0520044	0.364238
W6	0.685713	0.199602	1.89285	0.0518435	0.446178
