# Supplementary material for: Optimal Macroeconomic Policy in Nonlinear Models: A VSTAR Perspective
Source: publisher site journal article supplement (doi:10.1515/snde-2024-0100), 2025-10-08
Supplement: Supplementary file 3 [file AAADataset.xls]

## Sheet: FRED Graph
observation_date	FEDFUNDS	FEDFUNDS1	PC1	UNRATE	NROUST	IP	UGAP1	BAA	GS10	TA	TAGS	TAMBS	GDPN	Deficit
1979-08-01	10.94	10.47	9.27066	6	6.22667	1.41123	-0.53	10.35	9.24	155532	113028	0	2686.34	-1.09583
1979-09-01	11.43	10.94	9.61083	5.9	6.22333	1.26343	-0.226667	10.54	9.44	155967	113852	0	2705.11	-0.964479
1979-10-01	13.77	11.43	9.63252	6	6.22	1.01531	-0.323333	11.4	10.72	155456	114455	0	2723.88	-0.835912
1979-11-01	13.18	13.77	9.76874	5.9	6.22	0.16667	-0.22	11.99	10.38	159859	116239	0	2745.87	-0.751637
1979-12-01	13.78	13.18	10.1769	6	6.22	-0.23919	-0.32	12.06	10.33	157923	112856	0	2767.86	-0.668404
1980-01-01	13.82	13.78	10.4974	6.3	6.22	0.86457	-0.22	12.42	11.13	152711	112478	0	2789.84	-0.586193
1980-02-01	14.13	13.82	11.1021	6.3	6.21667	0.32775	0.08	13.57	12.72	154978	112301	0	2792.35	-0.284455
1980-03-01	17.19	14.13	11.5937	6.3	6.21333	-0.31553	0.0833333	14.45	12.64	159908	117830	0	2794.85	0.0143407
1980-04-01	17.61	17.19	11.0207	6.9	6.21	-1.24247	0.0866667	14.19	10.76	163157	118825	0	2797.35	0.310261
1980-05-01	10.98	17.61	10.7363	7.5	6.20667	-4.40755	0.69	13.17	10.25	168188	121200	0	2817.06	0.473518
1980-06-01	9.47	10.98	10.5245	7.6	6.20333	-5.59365	1.29333	12.71	10.09	160039	119841	0	2836.77	0.634362
1980-07-01	9.03	9.47	10.5384	7.8	6.2	-6.20079	1.39667	12.65	10.76	161597	119577	0	2856.48	0.792849
1980-08-01	9.61	9.03	10.6125	7.7	6.2	-5.23076	1.6	13.15	11.55	160770	118690	0	2899.51	0.565855
1980-09-01	10.87	9.61	10.6593	7.5	6.2	-3.80193	1.5	13.7	11.86	164234	120713	0	2942.53	0.34528
1980-10-01	12.81	10.87	10.6464	7.5	6.2	-3.11449	1.3	14.23	12.46	164326	120515	0	2985.56	0.130851
1980-11-01	15.85	12.81	10.7779	7.5	6.19667	-1.34521	1.3	14.64	12.72	165796	119161	0	3031.77	0.0590933
1980-12-01	18.9	15.85	10.5671	7.2	6.19333	-0.92675	1.30333	15.14	12.43	168545	119299	0	3077.99	-0.0101439
1981-01-01	19.08	18.9	10.4728	7.5	6.19	-1.93133	1.00667	15.03	12.68	158088	115138	0	3124.21	-0.0769811
1981-02-01	15.93	19.08	10.3932	7.4	6.18667	-2.40338	1.31	15.37	13.43	163786	116622	0	3136.98	-0.273445
1981-03-01	14.7	15.93	9.81436	7.4	6.18333	-1.55171	1.21333	15.34	13.13	165660	118541	0	3149.76	-0.469209
1981-04-01	15.72	14.7	9.72126	7.2	6.18	0.05552	1.21667	15.56	14.11	178252	120037	0	3162.53	-0.664279
1981-05-01	18.52	15.72	9.36379	7.5	6.17667	3.16024	1.02	15.95	13.5	164058	117193	0	3195.22	-0.836636
1981-06-01	19.1	18.52	9.10977	7.5	6.17333	4.95435	1.32333	15.8	13.86	165970	119360	0	3227.92	-1.00637
1981-07-01	19.04	19.1	8.92334	7.2	6.17	6.46854	1.32667	16.17	14.67	167845	120873	0	3260.61	-1.17354
1981-08-01	17.82	19.04	8.69826	7.4	6.16667	6.07431	1.03	16.34	15.41	164980	122829	0	3267.35	-0.708905
1981-09-01	15.87	17.82	8.35436	7.6	6.16333	3.77156	1.23333	16.92	15.84	169468	124330	0	3274.08	-0.251527
1981-10-01	15.08	15.87	7.97856	7.9	6.16	1.77394	1.43667	17.11	14.63	166346	121495	0	3280.82	0.198869
1981-11-01	13.31	15.08	7.68222	8.3	6.15667	-1.09751	1.74	16.39	13.13	171361	126479	0	3278.65	0.648383
1981-12-01	12.37	13.31	7.31855	8.5	6.15333	-2.72876	2.14333	16.55	13.98	178224	127990	0	3276.47	1.09543
1982-01-01	13.22	12.37	6.9285	8.6	6.15	-4.11883	2.34667	17.1	14.14	175190	126541	0	3274.3	1.54015
1982-02-01	14.78	13.22	6.17456	8.9	6.14667	-1.76612	2.45	17.18	14.03	168854	126250	0	3293.53	1.59163
1982-03-01	14.68	14.78	5.71267	9	6.14333	-3.02928	2.75333	16.82	14.18	169986	123992	0	3312.75	1.64271
1982-04-01	14.94	14.68	5.3065	9.3	6.14	-3.45824	2.85667	16.78	13.87	180629	128166	0	3331.97	1.69338
1982-05-01	14.45	14.94	5.45573	9.4	6.13667	-4.64393	3.16	16.64	13.71	169934	128765	0	3343.42	2.24044
1982-06-01	14.15	14.45	5.80102	9.6	6.13333	-5.41047	3.26333	16.92	14.44	171443	127005	0	3354.87	2.78329
1982-07-01	12.59	14.15	5.78843	9.8	6.13	-6.31815	3.46667	16.8	13.68	175915	132934	0	3366.32	3.32197
1982-08-01	10.12	12.59	5.45856	9.8	6.12667	-7.12695	3.67	16.32	12.81	178171	134738	0	3378.4	3.49184
1982-09-01	10.31	10.12	5.11379	10.1	6.12333	-6.86257	3.67333	15.63	11.73	173710	130305	0	3390.48	3.65974
1982-10-01	9.71	10.31	5.22852	10.4	6.12	-7.06752	3.97667	14.73	10.71	176812	132604	0	3402.56	3.82569
1982-11-01	9.2	9.71	4.97868	10.8	6.11667	-6.36239	4.28	14.3	10.79	179102	134630	0	3426.18	3.69261
1982-12-01	8.95	9.2	4.81374	10.8	6.11333	-6.01547	4.68333	14.14	10.36	187659	134801	0	3449.8	3.55607
1983-01-01	8.68	8.95	4.68184	10.4	6.11	-2.25194	4.68667	13.94	10.8	179973	133121	0	3473.41	3.41613
1983-02-01	8.51	8.68	4.54536	10.4	6.10667	-4.74175	4.29	13.95	10.27	185769	133965	0	3508.56	3.77427
1983-03-01	8.77	8.51	4.41148	10.3	6.10333	-3.23116	4.29333	13.61	10.62	179998	134660	0	3543.7	4.12533
1983-04-01	8.8	8.77	4.83342	10.2	6.1	-1.17105	4.19667	13.29	10.27	189383	137376	0	3578.85	4.46954
1983-05-01	8.63	8.8	4.51322	10.1	6.09667	0.14042	4.1	13.09	10.81	184279	140750	0	3615.62	4.11459
1983-06-01	8.98	8.63	4.14658	10.1	6.09333	1.07867	4.00333	13.37	10.96	185143	140729	0	3652.4	3.75999
1983-07-01	9.37	8.98	4.11587	9.4	6.09	2.93359	4.00667	13.39	11.76	186160	143500	0	3689.18	3.40579
1983-08-01	9.56	9.37	4.23931	9.5	6.09	4.99777	3.31	13.64	11.98	191118	144226	0	3724.35	2.93121
1983-09-01	9.45	9.56	4.3133	9.2	6.09	6.91502	3.41	13.55	11.44	193634	145194	0	3759.53	2.46062
1983-10-01	9.48	9.45	3.9089	8.8	6.09	8.77257	3.11	13.46	11.74	190549	147272	0	3794.71	1.99397
1983-11-01	9.34	9.48	3.74391	8.5	6.08667	9.59167	2.71	13.61	11.63	192699	149439	0	3832.49	1.86996
1983-12-01	9.47	9.34	3.64517	8.3	6.08333	10.9685	2.41333	13.75	11.82	199290	152570	0	3870.27	1.74709
1984-01-01	9.56	9.47	3.61173	8	6.08	11.0274	2.21667	13.65	11.67	197981	149699	0	3908.05	1.62536
1984-02-01	9.59	9.56	4.13189	7.8	6.07667	12.218	1.92	13.59	12.04	186239	140847	0	3941.9	1.36324
1984-03-01	9.91	9.59	4.34006	7.8	6.07333	11.8525	1.72333	13.99	12.53	188450	145670	0	3975.75	1.10657
1984-04-01	10.29	9.91	4.2611	7.7	6.07	11.212	1.72667	14.31	12.82	208122	154817	0	4009.6	0.855202
1984-05-01	10.32	10.29	4.09619	7.4	6.06667	10.9652	1.63	14.74	13.91	200241	153697	0	4034.48	0.958434
1984-06-01	11.06	10.32	3.89418	7.2	6.06333	10.6912	1.33333	15.05	13.84	197199	152907	0	4059.37	1.06163
1984-07-01	11.23	11.06	3.68262	7.5	6.06	9.38331	1.13667	15.15	12.91	197167	150167	0	4084.25	1.16476
1984-08-01	11.64	11.23	3.55628	7.5	6.05667	8.27357	1.44	14.63	12.79	196276	149054	0	4105.68	1.753
1984-09-01	11.3	11.64	3.33761	7.3	6.05333	6.46436	1.44333	14.35	12.47	202464	153480	0	4127.12	2.33469
1984-10-01	9.99	11.3	3.40386	7.4	6.05	5.42357	1.24667	13.94	11.79	197453	148220	0	4148.55	2.90994
1984-11-01	9.43	9.99	3.4031	7.2	6.04667	5.45794	1.35	13.48	11.58	203247	155214	0	4175.76	2.93525
1984-12-01	8.38	9.43	3.63673	7.3	6.04333	5.04116	1.15333	13.4	11.55	206821	161529	0	4202.96	2.96086
1985-01-01	8.35	8.38	3.70444	7.3	6.04	2.81881	1.25667	13.26	11.17	201454	155418	0	4230.17	2.98673
1985-02-01	8.5	8.35	3.49021	7.2	6.03667	2.73151	1.26	13.23	11.91	200763	155501	0	4251.74	3.19022
1985-03-01	8.58	8.5	3.55351	7.2	6.03333	2.39272	1.16333	13.69	11.65	202727	159169	0	4273.31	3.3923
1985-04-01	8.27	8.58	3.31269	7.3	6.03	1.46468	1.16667	13.51	11.41	213085	166717	0	4294.89	3.59296
1985-05-01	7.97	8.27	3.42796	7.2	6.02667	1.14912	1.27	13.15	10.28	210894	164714	0	4325.52	3.41435
1985-06-01	7.53	7.97	3.52348	7.4	6.02333	0.86285	1.17333	12.4	10.25	210141	166282	0	4356.14	3.23779
1985-07-01	7.88	7.53	3.40772	7.4	6.02	-0.10876	1.37667	12.43	10.57	215082	167095	0	4386.77	3.06324
1985-08-01	7.9	7.88	3.43221	7.1	6.01667	0.21021	1.38	12.5	10.28	213810	167934	0	4405.88	3.27696
1985-09-01	7.92	7.9	3.46633	7.1	6.01333	0.82075	1.08333	12.48	10.31	220963	170800	0	4424.99	3.48978
1985-10-01	7.99	7.92	3.39432	7.1	6.01	0.56898	1.08667	12.36	10.01	208395	161902	0	4444.09	3.70168
1985-11-01	8.05	7.99	3.54991	7	6.00667	0.51137	1.09	11.99	9.59	215871	167889	0	4465.36	3.67814
1985-12-01	8.27	8.05	3.60733	7	6.00333	1.4503	0.993333	11.58	9	229267	177730	0	4486.63	3.65523
1986-01-01	8.14	8.27	3.56445	6.7	6	2.09258	0.996667	11.44	9.08	229055	178139	0	4507.89	3.63294
1986-02-01	7.86	8.14	3.08637	7.2	5.99667	1.05582	0.7	11.11	8.13	222377	175870	0	4520.38	3.75026
1986-03-01	7.48	7.86	2.46062	7.2	5.99333	0.20949	1.20333	10.5	7.39	224983	174088	0	4532.86	3.86828
1986-04-01	6.99	7.48	2.10033	7.1	5.99	0.52211	1.20667	10.19	7.38	233778	174312	0	4545.34	3.98699
1986-05-01	6.85	6.99	2.04615	7.2	5.98333	0.59004	1.11	10.29	8.05	233933	181499	0	4566.12	4.18144
1986-06-01	6.92	6.85	2.14822	7.2	5.97667	0.18727	1.21667	10.34	7.35	229211	181893	0	4586.89	4.37453
1986-07-01	6.56	6.92	1.92453	7	5.97	1.40189	1.22333	10.16	7.34	232452	184104	0	4607.67	4.56627
1986-08-01	6.17	6.56	1.71547	6.9	5.96667	0.85595	1.03	10.18	6.95	233133	185575	0	4624.32	4.2964
1986-09-01	5.89	6.17	1.87559	7	5.96333	0.62732	0.933333	10.2	7.45	237653	186247	0	4640.97	4.02957
1986-10-01	5.85	5.89	1.8893	7	5.96	1.52308	1.03667	10.24	7.34	236830	188302	0	4657.63	3.76572
1986-11-01	6.04	5.85	1.77566	6.9	5.95667	1.65154	1.04	10.07	7.15	242178	191627	0	4679.14	3.67771
1986-12-01	6.91	6.04	1.57078	6.6	5.95333	1.43272	0.943333	9.97	7.23	266024	197625	0	4700.65	3.59054
1987-01-01	6.43	6.91	1.5784	6.6	5.95	0.65624	0.646667	9.72	7.18	257286	201565	0	4722.16	3.5042
1987-02-01	6.1	6.43	1.93553	6.6	5.94333	2.64481	0.65	9.65	7.19	239189	190043	0	4750.16	3.24966
1987-03-01	6.13	6.1	2.42749	6.6	5.93667	3.49974	0.656667	9.61	7.51	242310	194544	0	4778.16	2.99554
1987-04-01	6.37	6.13	3.02157	6.3	5.93	4.10109	0.663333	10.04	8.21	266516	204590	0	4806.16	2.74185
1987-05-01	6.85	6.37	3.09393	6.3	5.92667	4.55253	0.37	10.51	8.49	266083	205853	0	4832.29	2.48938
1987-06-01	6.73	6.85	3.10282	6.2	5.92333	5.39225	0.373333	10.52	8.38	264740	210712	0	4858.42	2.23915
1987-07-01	6.58	6.73	3.31264	6.1	5.92	5.5385	0.276667	10.61	8.66	253944	206296	0	4884.56	1.99114
1987-08-01	6.73	6.58	3.5908	6	5.91333	6.55136	0.18	10.8	9	259462	205809	0	4925.7	1.66105
1987-09-01	7.22	6.73	3.60118	5.9	5.90667	6.6148	0.0866667	11.31	9.63	261404	211941	0	4966.85	1.33193
1987-10-01	7.29	7.22	3.74341	6	5.9	7.65207	-0.00666667	11.62	8.88	273673	211453	0	5007.99	1.0038
1987-11-01	6.69	7.29	3.75692	5.8	5.89667	7.72447	0.1	11.23	8.99	261821	215532	0	5029.79	1.15488
1987-12-01	6.77	6.69	3.80673	5.7	5.89333	7.34255	-0.0966667	11.29	8.83	273419	218549	0	5051.58	1.30466
1988-01-01	6.83	6.77	3.72712	5.7	5.89	7.71747	-0.193333	11.07	8.26	268564	218892	0	5073.37	1.45316
1988-02-01	6.58	6.83	3.51438	5.7	5.88333	6.80042	-0.19	10.62	8.16	259378	214901	0	5112.26	1.31347
1988-03-01	6.58	6.58	3.5993	5.7	5.87667	6.88002	-0.183333	10.57	8.57	262244	215160	0	5151.15	1.17535
1988-04-01	6.87	6.58	3.7158	5.4	5.87	6.81665	-0.176667	10.9	8.87	274196	222947	0	5190.04	1.03877
1988-05-01	7.09	6.87	3.75315	5.6	5.86333	5.99437	-0.47	11.04	9.2	263303	215217	0	5220.97	1.07321
1988-06-01	7.51	7.09	3.80169	5.4	5.85667	5.76951	-0.263333	11	8.82	278523	223010	0	5251.9	1.10723
1988-07-01	7.75	7.51	4.0666	5.4	5.85	5.08373	-0.456667	11.11	9.12	270796	220727	0	5282.84	1.14082
1988-08-01	8.01	7.75	3.96509	5.6	5.84333	4.67547	-0.45	11.21	9.25	273593	222795	0	5321.73	1.1466
1988-09-01	8.19	8.01	4.12044	5.4	5.83667	4.12367	-0.243333	10.9	8.87	283534	226015	0	5360.62	1.1526
1988-10-01	8.3	8.19	4.12862	5.4	5.83	3.13213	-0.436667	10.41	8.65	275457	224263	0	5399.51	1.15882
1988-11-01	8.35	8.3	4.17197	5.3	5.82333	2.75337	-0.43	10.48	9.06	284420	228701	0	5436.76	1.005
1988-12-01	8.76	8.35	4.30536	5.3	5.81667	2.75216	-0.523333	10.65	9.14	293986	233562	0	5474.01	0.852481
1989-01-01	9.12	8.76	4.43266	5.4	5.81	3.01275	-0.516667	10.65	9.01	288865	232974	0	5511.25	0.701244
1989-02-01	9.36	9.12	4.62788	5.2	5.80333	2.10559	-0.41	10.61	9.32	279987	224659	0	5544.99	0.734559
1989-03-01	9.85	9.36	4.65563	5	5.79667	2.11523	-0.603333	10.67	9.3	280916	227924	0	5578.73	0.767527
1989-04-01	9.84	9.85	4.84356	5.2	5.79	1.62562	-0.796667	10.61	9.02	292117	236004	0	5612.46	0.800155
1989-05-01	9.81	9.84	4.92144	5.2	5.78333	1.05447	-0.59	10.46	8.6	285058	223535	0	5640.1	0.838306
1989-06-01	9.53	9.81	4.70542	5.3	5.77667	0.84887	-0.583333	10.03	8.1	296949	231062	0	5667.73	0.876202
1989-07-01	9.24	9.53	4.44899	5.2	5.77	-0.08904	-0.476667	9.87	7.82	285483	219897	0	5695.36	0.913844
1989-08-01	8.99	9.24	4.15139	5.2	5.76333	0.38212	-0.57	9.88	8.26	282336	216339	0	5712.66	1.16465
1989-09-01	9.02	8.99	3.87724	5.3	5.75667	0.29885	-0.563333	9.91	8.31	288656	220565	0	5729.95	1.41525
1989-10-01	8.84	9.02	3.94453	5.3	5.75	-0.2624	-0.456667	9.81	7.92	282636	211871	0	5747.24	1.66562
1989-11-01	8.55	8.84	3.93028	5.4	5.74333	-0.09368	-0.45	9.81	7.84	301036	228897	0	5789.06	1.85843
1989-12-01	8.45	8.55	3.90622	5.4	5.73667	0.04231	-0.343333	9.82	7.93	310256	233951	0	5830.88	2.04847
1990-01-01	8.23	8.45	4.16043	5.4	5.73	-0.92843	-0.336667	9.94	8.43	292033	218392	0	5872.7	2.2358
1990-02-01	8.24	8.23	4.27233	5.3	5.72333	0.51409	-0.33	10.14	8.51	291669	219132	0	5901.81	2.4457
1990-03-01	8.28	8.24	4.27653	5.2	5.71667	0.76923	-0.423333	10.21	8.65	294962	220529	0	5930.92	2.65366
1990-04-01	8.26	8.28	3.80366	5.4	5.71	0.5233	-0.516667	10.3	9.04	297448	223944	0	5960.03	2.8597
1990-05-01	8.18	8.26	3.65926	5.4	5.70333	1.44375	-0.31	10.41	8.6	300256	224463	0	5978.39	3.10159
1990-06-01	8.29	8.18	3.88871	5.2	5.69667	1.72282	-0.303333	10.22	8.43	304752	230978	0	5996.75	3.34234
1990-07-01	8.15	8.29	3.89754	5.5	5.69	2.5116	-0.496667	10.2	8.36	304772	231264	0	6015.12	3.58196
1990-08-01	8.13	8.15	4.57649	5.7	5.68333	1.89846	-0.19	10.41	8.86	306025	233520	0	6011.65	3.93633
1990-09-01	8.2	8.13	4.9849	5.9	5.67667	2.39855	0.0166667	10.64	8.82	310451	236575	0	6008.19	4.29403
1990-10-01	8.11	8.2	5.17478	5.9	5.67	1.70487	0.223333	10.74	8.65	315067	237763	0	6004.73	4.65502
1990-11-01	7.81	8.11	5.07863	6.2	5.66667	0.17917	0.23	10.62	8.26	317550	244016	0	6014.88	4.91806
1990-12-01	7.31	7.81	4.87368	6.3	5.66333	-1.07882	0.533333	10.43	8.08	319191	241569	0	6025.03	5.18239
1991-01-01	6.91	7.31	4.48021	6.4	5.66	-0.84677	0.636667	10.45	8.03	312294	236592		6035.18	5.44796
1991-02-01	6.25	6.91	4.07478	6.6	5.65333	-2.49751	0.74	10.07	8.02	312702	239815		6065.74	5.29659
1991-03-01	6.12	6.25	3.7056	6.8	5.64667	-3.48147	0.946667	10.09	8.05	313781	241238		6096.3	5.14668
1991-04-01	5.91	6.12	3.67707	6.7	5.64	-3.12219	1.15333	9.94	8.02	309293	239000		6126.86	4.99821
1991-05-01	5.78	5.91	3.87289	6.9	5.63333	-2.36921	1.06	9.86	8.06	319439	247635		6153.22	5.10321
1991-06-01	5.9	5.78	3.59076	6.9	5.62667	-1.79905	1.26667	9.96	8.24	322369	251189		6179.58	5.2065
1991-07-01	5.82	5.9	3.49797	6.8	5.62	-1.57805	1.27333	9.89	8.2	317352	249177		6205.94	5.30811
1991-08-01	5.66	5.82	3.05171	6.9	5.61333	-1.79758	1.18	9.65	7.82	317255	253044		6225.47	5.09297
1991-09-01	5.45	5.66	2.77669	6.9	5.60667	-1.06673	1.28667	9.51	7.47	321214	256361		6245.01	4.87354
1991-10-01	5.21	5.45	2.38314	7	5.6	-0.47959	1.29333	9.49	7.47	322891	257042		6264.54	4.64986
1991-11-01	4.81	5.21	2.47791	7	5.59667	0.58423	1.4	9.45	7.38	328865	264555		6297.39	4.29286
1991-12-01	4.43	4.81	2.63848	7.3	5.59333	0.84454	1.40333	9.26	6.71	346625	275934		6330.25	3.93633
1992-01-01	4.03	4.43	2.38897	7.3	5.59	0.72694	1.70667	9.13	7.31	329571	261957		6315.83	4.03685
1992-02-01	4.06	4.03	2.59626	7.4	5.58333	2.13668	1.71	9.23	7.27	330541	264912		6356.43	4.07563
1992-03-01	3.98	4.06	2.82427	7.4	5.57667	3.54137	1.81667	9.25	7.54	332524	266994		6417.05	3.92089
1992-04-01	3.73	3.98	2.9147	7.4	5.57	4.10747	1.82333	9.21	7.61	331678	267034		6443.28	4.09653
1992-05-01	3.82	3.73	2.62483	7.6	5.56333	3.41777	1.83	9.13	7.33	342026	277212		6433.98	4.15788
1992-06-01	3.76	3.82	2.6342	7.8	5.55667	2.5011	2.03667	9.05	7.14	342422	279196		6535.03	3.16315
1992-07-01	3.25	3.76	2.81059	7.7	5.55	3.31425	2.24333	8.84	6.72	338375	274554		6557.53	2.92277
1992-08-01	3.3	3.25	2.711	7.6	5.54667	2.72567	2.15	8.65	6.62	339548	276825		6556.62	2.95774
1992-09-01	3.22	3.3	2.52521	7.6	5.54333	2.06274	2.05333	8.62	6.37	360681	294986		6585.77	2.70816
1992-10-01	3.1	3.22	2.69511	7.3	5.54	3.00041	2.05667	8.84	6.8	346715	282525		6637.31	2.24631
1992-11-01	3.09	3.1	2.67101	7.4	5.53333	3.56444	1.76	8.96	6.95	356682	292683		6680.25	2.00434
1992-12-01	2.92	3.09	2.59332	7.4	5.52667	4.05936	1.86667	8.81	6.7	369089	301342		6724.85	1.74986
1993-01-01	3.02	2.92	2.7045	7.3	5.52	5.09622	1.87333	8.67	6.39	357932	297426		6717.71	1.52314
1993-02-01	3.03	3.02	2.5983	7.1	5.51667	4.81262	1.78	8.39	6.03	359077	299778		6741.54	1.75114
1993-03-01	3.07	3.03	2.56048	7	5.51333	3.80318	1.58333	8.15	6.03	362161	299440		6729.13	2.51424
1993-04-01	2.96	3.07	2.55508	7.1	5.51	3.38035	1.48667	8.14	6.05	367681	305477		6768.32	2.45682
1993-05-01	3	2.96	2.73719	7.1	5.50333	2.6827	1.59	8.21	6.16	380922	318078		6824.2	1.71737
1993-06-01	3.04	3	2.59048	7	5.49667	2.84065	1.59667	8.07	5.8	387030	323714		6834.3	2.46932
1993-07-01	3.06	3.04	2.41529	6.9	5.49	2.2385	1.50333	7.93	5.83	374368	312990		6832.98	2.57772
1993-08-01	3.03	3.06	2.45367	6.8	5.48667	2.63359	1.41	7.6	5.45	378622	318455		6873.97	2.21501
1993-09-01	3.09	3.03	2.39328	6.7	5.48333	2.88421	1.31333	7.34	5.4	391523	326938		6939.34	1.90937
1993-10-01	2.99	3.09	2.35381	6.8	5.48	2.90057	1.21667	7.31	5.43	386581	322594		6944.72	2.37903
1993-11-01	3.02	2.99	2.34624	6.6	5.47667	2.89406	1.32	7.66	5.83	397329	353675		7036.01	1.8593
1993-12-01	2.96	3.02	2.19191	6.5	5.47333	3.35723	1.12333	7.69	5.83	408578	344321		7060.49	1.97567
1994-01-01	3.05	2.96	1.97643	6.6	5.47	3.29783	1.02667	7.65	5.7	400059	334706		7074.47	1.70497
1994-02-01	3.25	3.05	2.06004	6.6	5.46333	2.87872	1.13	7.76	6.15	406184	338547		7122.96	1.21435
1994-03-01	3.34	3.25	2.13196	6.5	5.45667	4.0591	1.13667	8.13	6.77	404746	342254		7149.53	0.582364
1994-04-01	3.56	3.34	1.98175	6.4	5.45	4.28956	1.04333	8.52	7.06	406964	343160		7186.28	0.349336
1994-05-01	4.01	3.56	1.81403	6.1	5.44667	5.18449	0.95	8.62	7.17	407989	347274		7290.27	-0.122361
1994-06-01	4.25	4.01	2.02733	6.1	5.44333	5.67853	0.653333	8.65	7.34	412606	351622		7264.24	0.126377
1994-07-01	4.26	4.25	2.18686	6.1	5.44	5.51664	0.656667	8.8	7.12	412310	350895		7299.04	-0.269029
1994-08-01	4.47	4.26	2.2455	6	5.43667	6.25612	0.66	8.74	7.19	414296	352554		7351.72	-0.459983
1994-09-01	4.73	4.47	2.2533	5.9	5.43333	6.15309	0.563333	8.98	7.62	411876	349846		7342.47	0.122271
1994-10-01	4.76	4.73	2.10467	5.8	5.43	6.23628	0.466667	9.2	7.81	420608	357380		7429.13	-0.698825
1994-11-01	5.29	4.76	2.10646	5.6	5.42667	6.44923	0.37	9.32	7.91	427904	363933		7431.81	0.221825
1994-12-01	5.45	5.29	2.14922	5.5	5.42333	6.98262	0.173333	9.1	7.84	439979	370962		7504.92	-0.0915219
1995-01-01	5.53	5.45	2.32143	5.6	5.42	6.77296	0.0766667	9.08	7.6	423905	361284		7542.18	-0.189316
1995-02-01	5.92	5.53	2.26574	5.4	5.41667	6.58672	0.18	8.85	7.22	431267	365087		7488.28	0.776366
1995-03-01	5.98	5.92	2.17204	5.4	5.41333	5.66007	-0.0166667	8.7	7.2	432342	369324		7536.4	0.659031
1995-04-01	6.05	5.98	2.32129	5.8	5.41	4.99317	-0.0133333	8.6	7.07	444140	378378		7538.96	1.02893
1995-05-01	6.01	6.05	2.3308	5.6	5.40667	4.81589	0.39	8.2	6.3	438203	374602		7560.86	1.64581
1995-06-01	6	6.01	2.18105	5.6	5.40333	4.50451	0.193333	7.9	6.21	437955	375686		7643.17	0.593635
1995-07-01	5.85	6	1.98649	5.7	5.4	3.93077	0.196667	8.04	6.45	434207	368520		7630.48	0.893027
1995-08-01	5.74	5.85	1.97344	5.7	5.39667	4.62034	0.3	8.19	6.28	436336	373531		7674.12	0.559798
1995-09-01	5.8	5.74	1.92872	5.6	5.39333	4.64109	0.303333	7.93	6.17	438858	376139		7744.77	-0.537475
1995-10-01	5.76	5.8	2.02167	5.5	5.39	3.63305	0.206667	7.75	6.03	441787	377953		7747.38	-0.220911
1995-11-01	5.8	5.76	1.82437	5.6	5.38667	3.24488	0.11	7.68	5.76	441766	379703		7747.69	0.0684314
1995-12-01	5.6	5.8	1.95301	5.6	5.38333	2.57579	0.213333	7.49	5.58	452557	387865		7822.68	0.34394
1996-01-01	5.56	5.6	1.97443	5.6	5.38	1.72439	0.216667	7.47	5.6	435350	372514		7840.44	0.782082
1996-02-01	5.22	5.56	1.95406	5.5	5.37667	3.45391	0.22	7.63	6.13	444582	383158		7852.86	0.00995614
1996-03-01	5.31	5.22	2.07395	5.5	5.37333	3.20739	0.123333	8.03	6.34	448163	385023		7912.11	-0.265739
1996-04-01	5.22	5.31	2.11048	5.6	5.37	4.22476	0.126667	8.19	6.66	463338	397860		8025.06	-1.36512
1996-05-01	5.24	5.22	2.12959	5.6	5.36667	4.6313	0.23	8.3	6.85	449151	385154		8009.41	-0.883681
1996-06-01	5.27	5.24	2.02839	5.3	5.36333	5.15587	0.233333	8.4	6.73	448412	386748		8064.05	-0.45092
1996-07-01	5.4	5.27	2.1179	5.5	5.36	5.43419	-0.0633333	8.35	6.8	447351	385047		8099.34	-0.67661
1996-08-01	5.22	5.4	1.99368	5.1	5.35667	4.71859	0.14	8.18	6.96	457126	394050		8122.94	-0.153445
1996-09-01	5.3	5.22	2.212	5.2	5.35333	5.02005	-0.256667	8.35	6.72	458886	396783		8171.95	0.388227
1996-10-01	5.24	5.3	2.25618	5.2	5.35	5.09294	-0.153333	8.07	6.37	454742	390265		8251.07	0.123366
1996-11-01	5.31	5.24	2.44068	5.4	5.34667	5.75418	-0.15	7.79	6.06	462251	398755		8281.77	-0.436495
1996-12-01	5.29	5.31	2.36266	5.4	5.34333	6.04	0.0533333	7.89	6.43	475002	407289		8246.48	0.145272
1997-01-01	5.25	5.29	2.26764	5.3	5.34	6.8832	0.0566667	8.09	6.53	471238	405859		8309.34	-0.517126
1997-02-01	5.19	5.25	2.32199	5.2	5.33667	6.51119	-0.04	7.94	6.56	470742	408231		8385.54	-1.20493
1997-03-01	5.39	5.19	2.12117	5.2	5.33333	7.35939	-0.136667	8.18	6.92	470517	408528		8393.08	-0.974344
1997-04-01	5.51	5.39	1.91609	5.1	5.33	6.41057	-0.133333	8.34	6.72	487325	422227		8512.11	-1.15317
1997-05-01	5.5	5.51	1.6925	4.9	5.32667	6.25278	-0.23	8.2	6.67	473257	411506		8476.29	-1.13166
1997-06-01	5.56	5.5	1.82525	5	5.32333	5.87542	-0.426667	8.02	6.51	484672	422859		8568.07	-1.49376
1997-07-01	5.52	5.56	1.66983	4.9	5.32	6.81323	-0.323333	7.75	6.02	480574	417919		8620.8	-1.71739
1997-08-01	5.54	5.52	1.65598	4.8	5.31667	7.3131	-0.42	7.82	6.34	486529	424986		8655.76	-1.8436
1997-09-01	5.54	5.54	1.61459	4.9	5.31333	7.5292	-0.516667	7.7	6.12	484194	423549		8711.91	-1.92044
1997-10-01	5.5	5.54	1.43884	4.7	5.31	8.52266	-0.413333	7.57	5.84	480831	418571		8747.99	-1.6161
1997-11-01	5.52	5.5	1.26301	4.6	5.30667	8.52359	-0.61	7.42	5.86	492964	432439		8736.43	-1.37323
1997-12-01	5.5	5.52	1.12499	4.7	5.30333	8.14282	-0.706667	7.32	5.75	505142	439182		8813.29	-2.2818
1998-01-01	5.56	5.5	1.04386	4.6	5.3	8.55871	-0.603333	7.19	5.53	500816	436953		8772.59	-1.57818
1998-02-01	5.51	5.56	0.78024	4.6	5.29667	7.39525	-0.7	7.25	5.62	502918	441269		8894.38	-1.81534
1998-03-01	5.49	5.51	0.69057	4.7	5.29333	6.73824	-0.696667	7.32	5.67	500541	439854		8932.48	-1.98425
1998-04-01	5.45	5.49	0.71545	4.3	5.29	7.09602	-0.593333	7.33	5.68	534591	468453		8925.74	-1.00229
1998-05-01	5.49	5.45	0.90146	4.4	5.29	7.16218	-0.99	7.3	5.56	504508	442643		8952.66	-1.6825
1998-06-01	5.56	5.49	0.68664	4.5	5.29	5.97245	-0.89	7.13	5.44	515138	452990		9030.69	-1.76048
1998-07-01	5.54	5.56	0.87559	4.5	5.29	4.81762	-0.79	7.15	5.5	511878	449765		9050.71	-1.73363
1998-08-01	5.55	5.54	0.93393	4.5	5.28667	5.86427	-0.79	7.14	5.05	515172	450627		9100.03	-1.83209
1998-09-01	5.51	5.55	0.63183	4.6	5.28333	4.72787	-0.786667	7.09	4.44	518410	454434		9212.55	-2.19544
1998-10-01	5.07	5.51	0.72192	4.5	5.28	4.66191	-0.683333	7.18	4.64	516148	450245		9265.45	-2.30583
1998-11-01	4.83	5.07	0.72322	4.4	5.27667	3.68476	-0.78	7.34	4.74	527256	458355		9307.06	-2.67875
1998-12-01	4.68	4.83	0.84506	4.4	5.27333	3.75081	-0.876667	7.23	4.65	546322	470321		9309.47	-2.16133
1999-01-01	4.63	4.68	0.93819	4.3	5.27	3.69958	-0.873333	7.29	4.66	534429	464429		9361.74	-2.80962
1999-02-01	4.76	4.63	0.93198	4.4	5.26667	4.11466	-0.97	7.39	5.29	541717	470976		9417.41	-2.36748
1999-03-01	4.81	4.76	0.99199	4.2	5.26333	4.20562	-0.866667	7.53	5.25	545923	481757		9472.65	-2.517
1999-04-01	4.74	4.81	1.3553	4.3	5.26	4.12466	-1.06333	7.48	5.36	545736	480357		9495.08	-2.77022
1999-05-01	4.74	4.74	1.28144	4.2	5.25667	4.1694	-0.96	7.72	5.64	545704	483194		9534.1	-2.68427
1999-06-01	4.76	4.74	1.39862	4.3	5.25333	4.6555	-1.05667	8.02	5.81	545850	485293		9543.28	-2.06513
1999-07-01	4.99	4.76	1.41781	4.3	5.25	5.68312	-0.953333	7.95	5.92	554488	489944		9654.43	-2.47079
1999-08-01	5.07	4.99	1.46105	4.2	5.24667	3.9953	-0.95	8.15	5.98	559163	491291		9655.39	-2.05452
1999-09-01	5.22	5.07	1.88491	4.2	5.24333	3.75892	-1.04667	8.2	5.9	567937	496239		9735.74	-1.70401
1999-10-01	5.2	5.22	1.83433	4.1	5.24	4.29411	-1.04333	8.38	6.02	572664	492051		9817.27	-1.757
1999-11-01	5.42	5.2	1.9205	4.1	5.23333	4.86047	-1.14	8.15	6.18	596384	494529		9888.62	-2.05369
1999-12-01	5.3	5.42	2.05516	4	5.22667	5.27366	-1.13333	8.19	6.45	668906	483417		9992.25	-2.78663
2000-01-01	5.45	5.3	2.18862	4	5.22	4.79626	-1.22667	8.33	6.68	595140	499138		9925.78	-2.20367
2000-02-01	5.73	5.45	2.56743	4.1	5.21667	4.54756	-1.22	8.29	6.42	588665	500423		9995.7	-2.49985
2000-03-01	5.85	5.73	2.93086	4	5.21333	4.7769	-1.11667	8.37	6.03	579454	502762		10087.1	-2.91472
2000-04-01	6.02	5.85	2.35028	3.8	5.21	5.24785	-1.21333	8.4	6.23	608139	507776		10224.2	-3.77364
2000-05-01	6.27	6.02	2.36982	4	5.20667	4.69864	-1.41	8.9	6.29	578592	509115		10231.7	-3.67108
2000-06-01	6.53	6.27	2.68495	4	5.20333	4.97527	-1.20667	8.48	6.03	589559	507884		10287.1	-4.01254
2000-07-01	6.54	6.53	2.66864	4	5.2	4.16391	-1.20333	8.35	6.04	584640	507830		10236.9	-3.15847
2000-08-01	6.5	6.54	2.47645	4.1	5.19667	3.41737	-1.2	8.26	5.73	582759	513095		10341.9	-4.1679
2000-09-01	6.52	6.5	2.54854	3.9	5.19333	4.25272	-1.09667	8.35	5.8	583123	512472		10380.7	-4.33431
2000-10-01	6.51	6.52	2.51424	3.9	5.19	2.5805	-1.29333	8.34	5.77	582454	511038		10440.8	-4.60462
2000-11-01	6.51	6.51	2.56537	3.9	5.18667	2.11014	-1.29	8.28	5.48	597282	514308		10448.6	-3.85565
2000-12-01	6.4	6.51	2.48538	3.9	5.18333	1.06887	-1.28667	8.02	5.12	619724	515491		10427.6	-2.77443
2001-01-01	5.98	6.4	2.70148	4.2	5.18	0.40193	-1.28333	7.93	5.19	611706	518441		10471.5	-3.02795
2001-02-01	5.49	5.98	2.53933	4.2	5.17667	-0.48437	-0.98	7.87	4.92	613259	521118		10465.9	-2.44949
2001-03-01	5.31	5.49	2.10919	4.3	5.17333	-1.12593	-0.976667	7.84	4.93	598010	524946		10481.2	-1.86943
2001-04-01	4.8	5.31	2.37354	4.4	5.17	-2.12913	-0.873333	8.07	5.35	603250	527300		10562.9	-1.39633
2001-05-01	4.21	4.8	2.55675	4.3	5.16667	-2.88356	-0.77	8.07	5.43	632094	529372		10639.6	-1.45499
2001-06-01	3.97	4.21	2.39173	4.5	5.16333	-3.55633	-0.866667	7.97	5.42	613887	535191		10591	-0.616052
2001-07-01	3.77	3.97	2.10193	4.6	5.16	-3.96284	-0.663333	7.97	5.07	630973	536392		10582.3	-0.549923
2001-08-01	3.65	3.77	2.09567	4.9	5.15667	-3.81075	-0.56	7.85	4.85	625160	542873		10693.3	-0.0939161
2001-09-01	3.07	3.65	1.3139	5	5.15333	-4.54609	-0.256667	8.03	4.6	638318	526817		10513.3	1.51745
2001-10-01	2.49	3.07	1.53207	5.3	5.15	-4.67361	-0.153333	7.91	4.3	634694	544190		10641.4	1.6204
2001-11-01	2.09	2.49	1.3217	5.5	5.14667	-5.16738	0.15	7.81	4.78	648787	550765		10586.1	1.794
2001-12-01	1.82	2.09	1.06233	5.7	5.14333	-4.88315	0.353333	8.05	5.07	662945	555997		10753.3	0.64554
2002-01-01	1.73	1.82	0.66612	5.7	5.14	-3.66165	0.556667	7.87	5.07	657669	562933		10787	0.540913
2002-02-01	1.74	1.73	0.67768	5.7	5.13667	-3.09198	0.56	7.89	4.88	658103	568702		10754.8	1.201
2002-03-01	1.73	1.74	0.94338	5.7	5.13333	-2.05291	0.563333	8.11	5.42	659092	576093		10825.1	1.436
2002-04-01	1.75	1.73	1.18817	5.9	5.13	-1.36448	0.566667	8.03	5.11	663457	582038		10867.2	2.15915
2002-05-01	1.75	1.75	0.98817	5.8	5.12667	-0.34172	0.77	8.09	5.08	697225	587559		10873.4	2.57738
2002-06-01	1.75	1.75	0.93509	5.8	5.12333	1.2115	0.673333	7.95	4.86	687160	592390		10939	2.04596
2002-07-01	1.73	1.75	1.19212	5.8	5.12	1.54493	0.676667	7.9	4.51	688852	600510		11007.3	1.70398
2002-08-01	1.74	1.73	1.40392	5.7	5.11667	1.68196	0.68	7.58	4.14	679263	604401		10961.9	2.62356
2002-09-01	1.75	1.74	1.93272	5.7	5.11333	2.21734	0.583333	7.4	3.63	681578	606248		11007	1.55767
2002-10-01	1.75	1.75	1.75939	5.7	5.11	2.35488	0.586667	7.73	3.93	692547	608665		11004.3	2.35891
2002-11-01	1.34	1.75	1.92975	5.9	5.10667	3.39679	0.59	7.62	4.22	697941	609614		11063.8	1.7233
2002-12-01	1.24	1.34	2.13244	6	5.10333	2.8656	0.793333	7.45	3.83	733107	629402		11146.3	2.13993
2003-01-01	1.24	1.24	2.34482	5.8	5.1	2.81189	0.896667	7.35	4	712809	629406	0	11145.2	2.29027
2003-02-01	1.26	1.24	2.60616	5.9	5.09667	3.15988	0.7	7.06	3.71	721980	635996	0	11221.7	1.97708
2003-03-01	1.25	1.26	2.58909	5.9	5.09333	2.10651	0.803333	6.95	3.83	725019	640891	0	11183.6	2.79425
2003-04-01	1.26	1.25	1.98934	6	5.09	0.97633	0.806667	6.85	3.89	746294	647271	0	11260	2.86189
2003-05-01	1.26	1.26	1.80676	6.1	5.08667	0.57623	0.91	6.38	3.37	744896	650859	0	11274.8	2.83859
2003-06-01	1.22	1.26	1.78837	6.3	5.08333	-0.20963	1.01333	6.19	3.54	744018	651993	0	11403.9	2.52577
2003-07-01	1.01	1.22	1.86239	6.2	5.08	0.46091	1.21667	6.62	4.49	740295	652856	0	11463.4	2.5911
2003-08-01	1.03	1.01	2.00571	6.1	5.07667	0.31021	1.12	7.01	4.45	740637	653671	0	11570.6	1.88678
2003-09-01	1.01	1.03	2.1414	6.1	5.07333	0.76029	1.02333	6.79	3.96	741193	655993	0	11668	1.70327
2003-10-01	1.01	1.01	1.96894	6	5.07	1.21261	1.02667	6.73	4.33	747272	658672	0	11696.4	1.6193
2003-11-01	1	1.01	1.99648	5.8	5.06667	1.47298	0.93	6.66	4.34	756964	664515	0	11782.7	1.70447
2003-12-01	0.98	1	2.12353	5.7	5.06333	1.88371	0.733333	6.6	4.27	771551	666665	0	11828.7	2.1121
2004-01-01	1	0.98	2.21273	5.7	5.06	1.56104	0.636667	6.44	4.16	755279	667060	0	11805.2	2.43729
2004-02-01	1.01	1	1.99978	5.6	5.05667	1.84337	0.64	6.27	3.99	750666	671527	0	11923.5	2.01161
2004-03-01	1	1.01	1.89616	5.8	5.05333	1.56964	0.543333	6.11	3.86	760725	674084	0	12031.8	1.04406
2004-04-01	1	1	2.25877	5.6	5.05	2.74287	0.746667	6.46	4.53	772927	676383	0	12032.4	1.21881
2004-05-01	1	1	2.70778	5.6	5.04667	3.5392	0.55	6.75	4.66	771108	680633	0	12169.9	0.565655
2004-06-01	1.03	1	2.89129	5.6	5.04333	2.5201	0.553333	6.78	4.62	779578	687391	0	12124.7	1.42023
2004-07-01	1.26	1.03	2.68481	5.5	5.04	2.86148	0.556667	6.62	4.5	773916	693717	0	12278.9	0.921359
2004-08-01	1.43	1.26	2.39245	5.4	5.03667	3.09519	0.46	6.46	4.13	775437	694840	0	12299.4	1.33971
2004-09-01	1.61	1.43	2.27273	5.4	5.03333	2.57767	0.363333	6.27	4.14	786330	698617	0	12331.7	1.64933
2004-10-01	1.76	1.61	2.69967	5.5	5.03	3.3984	0.366667	6.21	4.05	791336	706730	0	12466	1.10489
2004-11-01	1.93	1.76	2.96503	5.4	5.02667	2.82682	0.47	6.2	4.36	809956	711595	0	12510.6	1.43094
2004-12-01	2.16	1.93	2.79375	5.4	5.02333	3.65339	0.373333	6.15	4.24	810944	717813	0	12590.7	1.37782
2005-01-01	2.28	2.16	2.53262	5.3	5.02	3.8682	0.376667	6.02	4.14	807262	717827	0	12745.1	0.612744
2005-02-01	2.5	2.28	2.59896	5.4	5.01667	3.9462	0.28	5.82	4.36	804576	717839	0	12745.5	0.965694
2005-03-01	2.63	2.5	2.74774	5.2	5.01333	4.31621	0.383333	6.06	4.5	807551	717536	0	12793.4	1.03668
2005-04-01	2.79	2.63	2.8439	5.2	5.01	4.00504	0.186667	6.05	4.21	809797	718638	0	12845.1	0.551342
2005-05-01	3	2.79	2.56989	5.1	5.00667	3.32153	0.19	6.01	4	810160	722992	0	12874	1.06005
2005-06-01	3.04	3	2.33993	5	5.00333	4.58064	0.0933333	5.86	3.94	810082	726022	0	13011	0.150837
2005-07-01	3.26	3.04	2.67968	5	5	3.4626	-0.00333333	5.95	4.28	814259	724702	0	13088.5	0.513011
2005-08-01	3.5	3.26	3.04012	4.9	5	3.66598	0	5.96	4.02	823237	730380	0	13151.5	0.337193
2005-09-01	3.62	3.5	3.83077	5	5	1.6458	-0.1	6.03	4.34	823771	736082	0	13188.7	0.337558
2005-10-01	3.78	3.62	3.55116	5	5	1.95851	0	6.3	4.57	819105	739542	0	13246.6	0.744608
2005-11-01	4	3.78	2.93935	5	4.99667	2.77349	0	6.39	4.49	835059	744168	0	13305.6	0.70917
2005-12-01	4.16	4	2.88395	4.9	4.99333	2.6619	0.00333333	6.32	4.39	847700	744210	0	13444.8	0.476906
2006-01-01	4.29	4.16	3.24706	4.7	4.99	2.30113	-0.0933333	6.24	4.53	828901	746588	0	13531.1	0.847125
2006-02-01	4.49	4.29	3.0225	4.8	4.99	1.62998	-0.29	6.27	4.55	840555	752549	0	13571.4	0.62953
2006-03-01	4.59	4.49	2.91357	4.7	4.99	1.9721	-0.19	6.41	4.86	833675	758529	0	13709.3	0.200476
2006-04-01	4.79	4.59	3.10237	4.7	4.99	2.23255	-0.29	6.68	5.07	844572	759683	0	13689.4	0.500206
2006-05-01	4.94	4.79	3.32176	4.6	4.98667	1.99112	-0.29	6.75	5.12	851580	762411	0	13778.6	0.19972
2006-06-01	4.99	4.94	3.51295	4.6	4.98333	1.99112	-0.386667	6.78	5.15	844436	766349	0	13781.4	0.794861
2006-07-01	5.24	4.99	3.42781	4.7	4.98	2.27111	-0.383333	6.76	4.99	841552	764763	0	13785.6	1.10066
2006-08-01	5.25	5.24	3.33601	4.7	4.97667	2.38711	-0.28	6.59	4.74	850925	766738	0	13879.6	0.786726
2006-09-01	5.25	5.25	2.08113	4.5	4.97333	4.11695	-0.276667	6.43	4.64	849971	768915	0	13937.2	0.517279
2006-10-01	5.25	5.25	1.67724	4.4	4.97	2.76565	-0.473333	6.42	4.61	852648	768422	0	13969	0.45973
2006-11-01	5.25	5.25	1.92408	4.5	4.96333	1.62028	-0.57	6.2	4.46	856671	772610	0	14057.5	0.241099
2006-12-01	5.24	5.25	2.28684	4.4	4.95667	2.06071	-0.463333	6.22	4.71	869988	778938	0	14085.2	0.663008
2007-01-01	5.25	5.24	2.13322	4.6	4.95	1.41277	-0.556667	6.34	4.83	865730	778863	0	14131.2	0.758996
2007-02-01	5.26	5.25	2.38868	4.5	4.94333	2.44192	-0.35	6.28	4.56	877409	780793	0	14279	0.216068
2007-03-01	5.26	5.26	2.56581	4.4	4.93667	2.4483	-0.443333	6.27	4.65	869803	780890	0	14215.5	1.03879
2007-04-01	5.25	5.26	2.33149	4.5	4.93	2.76972	-0.536667	6.39	4.63	879686	787149	0	14342.6	0.319843
2007-05-01	5.25	5.25	2.35323	4.4	4.92667	2.91573	-0.43	6.39	4.9	876986	790260	0	14380.5	0.669113
2007-06-01	5.25	5.25	2.31726	4.6	4.92333	2.5421	-0.526667	6.7	5.03	865105	790497	0	14424	0.608058
2007-07-01	5.26	5.25	2.12444	4.7	4.92	2.53518	-0.323333	6.65	4.78	863890	790714	0	14393.8	0.871109
2007-08-01	5.02	5.26	1.87347	4.6	4.91333	2.35295	-0.22	6.65	4.54	872873	784637	0	14571.2	0.617526
2007-09-01	4.94	5.02	2.53418	4.7	4.90667	2.9666	-0.313333	6.59	4.59	889900	779633	0	14640	0.669789
2007-10-01	4.76	4.94	3.08932	4.7	4.9	2.59775	-0.206667	6.48	4.48	883385	779586	0	14630.7	0.941734
2007-11-01	4.49	4.76	3.59924	4.7	4.89667	3.2857	-0.2	6.4	3.97	879417	779693	0	14687.8	1.15898
2007-12-01	4.24	4.49	3.47197	5	4.89333	2.25865	-0.196667	6.65	4.04	890662	754612	0	14726	1.18739
2008-01-01	3.94	4.24	3.3884	5	4.89	2.51875	0.106667	6.54	3.67	900264	718371	0	14754.2	1.34056
2008-02-01	2.98	3.94	3.27298	4.9	4.90667	1.12937	0.11	6.82	3.53	893825	713355	0	14569	2.88435
2008-03-01	2.61	2.98	3.19059	5.1	4.92333	0.68412	-0.00666667	6.89	3.45	893965	612305	0	14629.9	2.41855
2008-04-01	2.28	2.61	3.1403	5	4.94	-0.79338	0.176667	6.97	3.77	888131	548692	0	14698.8	2.74934
2008-05-01	1.98	2.28	3.28228	5.4	4.94667	-1.3936	0.06	6.93	4.06	904054	491091	0	14743.9	3.59463
2008-06-01	2	1.98	3.81178	5.6	4.95333	-1.65521	0.453333	7.07	3.99	892713	478796	0	14974.2	3.63522
2008-07-01	2.01	2	4.1354	5.8	4.96	-2.13142	0.646667	7.16	3.99	918625	479206	0	14904.6	4.67917
2008-08-01	2	2.01	3.98108	6.1	4.99667	-3.83602	0.84	7.15	3.83	909982	479642	0	14858.4	6.65825
2008-09-01	1.81	2	3.66714	6.1	5.03333	-8.36254	1.10333	7.31	3.85	1211825	476578	0	14742.6	8.51457
2008-10-01	0.97	1.81	2.67195	6.5	5.07	-7.09753	1.06667	8.88	4.01	1969086	476469	0	14637	10.0201
2008-11-01	0.39	0.97	0.92617	6.8	5.10667	-8.78269	1.43	9.21	2.93	2106117	476407	0	14653.2	10.6834
2008-12-01	0.16	0.39	0.12893	7.3	5.14333	-11.4862	1.69333	8.43	2.25	2239457	475921	0	14388.5	12.7268
2009-01-01	0.15	0.16	-0.11146	7.8	5.18	-13.362	2.15667	8.14	2.87	1927082	475129	7377	14444.4	13.0675
2009-02-01	0.22	0.15	-0.13156	8.3	5.20333	-13.6336	2.62	8.08	3.02	1916115	474643	68745	14402.4	13.3226
2009-03-01	0.18	0.22	-0.52581	8.7	5.22667	-14.7946	3.09667	8.42	2.71	2071556	474746	236156	14336.8	14.7993
2009-04-01	0.15	0.18	-0.56742	9	5.25	-14.8321	3.47333	8.39	3.16	2066712	549046	366153	14328.4	15.999
2009-05-01	0.18	0.15	-0.88936	9.4	5.28667	-15.208	3.75	8.06	3.47	2080115	600142	427552	14350.2	15.7171
2009-06-01	0.21	0.18	-1.01872	9.5	5.32333	-15.3319	4.11333	7.5	3.53	2025571	653193	467226	14379.9	16.2166
2009-07-01	0.16	0.21	-1.46654	9.5	5.36	-13.9455	4.17667	7.09	3.52	2000547	695758	542888	14347.7	15.7496
2009-08-01	0.16	0.16	-1.10079	9.6	5.4	-11.6128	4.14	6.58	3.4	2074902	744878	622864	14454	14.3411
2009-09-01	0.15	0.16	-1.02236	9.8	5.44	-6.91099	4.2	6.31	3.31	2141020	769160	692365	14459.3	13.1682
2009-10-01	0.12	0.15	0.01265	10	5.48	-7.4974	4.36	6.29	3.41	2161537	774561	774066	14670.9	10.8156
2009-11-01	0.12	0.12	1.45973	9.9	5.52667	-5.93794	4.52	6.32	3.21	2206359	776535	852124	14642.5	11.1388
2009-12-01	0.12	0.12	2.09031	9.9	5.57333	-2.82117	4.37333	6.37	3.85	2234067	776587	908257	14570.7	10.264
2010-01-01	0.11	0.12	2.30143	9.8	5.62	0.71589	4.32667	6.25	3.63	2246886	776619	969728	14671.6	10.0269
2010-02-01	0.13	0.11	2.11633	9.8	5.63333	1.73578	4.18	6.34	3.61	2286127	776549	1032560	14691.7	9.68817
2010-03-01	0.16	0.13	2.37276	9.9	5.64667	4.04669	4.16667	6.27	3.84	2307150	776705	1068697	14800.7	8.6754
2010-04-01	0.2	0.16	2.28156	9.9	5.66	5.28235	4.25333	6.25	3.69	2330472	776717	1096416	14898.5	8.03584
2010-05-01	0.2	0.2	2.20753	9.6	5.67	7.88374	4.24	6.05	3.31	2334041	776877	1112910	14899.1	8.11237
2010-06-01	0.18	0.2	1.56189	9.4	5.68	8.4559	3.93	6.23	2.97	2330851	776989	1118127	14980.7	7.74891
2010-07-01	0.18	0.18	1.63826	9.4	5.69	7.73329	3.72	6.01	2.94	2325298	777021	1117474	15056.9	7.06043
2010-08-01	0.19	0.18	1.483	9.5	5.70333	6.87216	3.71	5.66	2.47	2301015	784498	1103167	15049.9	7.8139
2010-09-01	0.19	0.19	1.41921	9.5	5.71667	6.30174	3.79667	5.66	2.53	2298691	811669	1078539	15133	7.43915
2010-10-01	0.19	0.19	1.35798	9.4	5.73	5.6767	3.78333	5.72	2.63	2295392	837848	1051037	15221.5	8.22405
2010-11-01	0.19	0.19	1.30727	9.8	5.74	5.2972	3.67	5.92	2.81	2346001	901238	1037803	15194.1	7.71362
2010-12-01	0.18	0.19	1.47677	9.3	5.75	5.97288	4.06	6.1	3.3	2420570	1016102	992141	15307	6.08613
2011-01-01	0.17	0.18	1.55955	9.1	5.76	4.63697	3.55	6.09	3.42	2443527	1114448	965077	15186.1	6.90804
2011-02-01	0.16	0.17	1.84593	9	5.76667	3.81209	3.34	6.15	3.42	2533221	1213425	958201	15220.2	6.00376
2011-03-01	0.14	0.16	2.11144	9	5.77333	4.16228	3.23333	6.03	3.47	2622523	1333445	937155	15451.1	4.43976
2011-04-01	0.1	0.14	2.48712	9.1	5.78	3.41276	3.22667	6.02	3.32	2690985	1413467	927021	15525.3	3.77358
2011-05-01	0.09	0.1	2.76679	9	5.78333	2.15899	3.32	5.78	3.05	2774996	1519327	917856	15505.6	4.05137
2011-06-01	0.09	0.09	2.78889	9.1	5.78667	2.28419	3.21667	5.75	3.18	2865251	1617060	908853	15457.7	4.99156
2011-07-01	0.07	0.09	2.8754	9	5.79	2.38844	3.31333	5.76	2.82	2863576	1638161	897285	15560.8	4.97942
2011-08-01	0.1	0.07	2.97592	9	5.79333	2.65066	3.21	5.36	2.23	2853888	1652113	884945	15658.7	4.2372
2011-09-01	0.08	0.1	3.01889	9	5.79667	2.37357	3.20667	5.27	1.92	2850921	1664655	870883	15556	5.27331
2011-10-01	0.07	0.08	2.69413	8.8	5.8	3.3586	3.20333	5.37	2.17	2845685	1678012	849261	15812.2	4.1328
2011-11-01	0.08	0.07	2.70018	8.6	5.79	3.25308	3	5.14	2.08	2814235	1672038	827052	15789.7	4.37557
2011-12-01	0.07	0.08	2.52628	8.5	5.78	2.84899	2.81	5.25	1.89	2926095	1672092	837295	15787.5	5.35097
2012-01-01	0.08	0.07	2.56932	8.3	5.77	3.57623	2.72	5.23	1.83	2919545	1661529	835624	15888.9	4.25496
2012-02-01	0.1	0.08	2.51274	8.3	5.75667	4.32352	2.53	5.14	1.98	2925722	1661601	840795	16159.2	3.17467
2012-03-01	0.13	0.1	2.2965	8.2	5.74333	2.79303	2.54333	5.23	2.23	2878137	1664911	836786	16011.2	5.83623
2012-04-01	0.14	0.13	1.99984	8.2	5.73	3.93707	2.45667	5.19	1.95	2866561	1667766	847796	16129.1	5.91539
2012-05-01	0.16	0.14	1.57628	8.2	5.70667	3.90399	2.47	5.07	1.59	2842654	1656675	851750	16162.8	5.06681
2012-06-01	0.16	0.16	1.54605	8.2	5.68333	3.58105	2.49333	5.02	1.67	2863547	1666530	854979	16164.8	4.23662
2012-07-01	0.16	0.16	1.41023	8.2	5.66	3.30923	2.51667	4.87	1.51	2846757	1651432	853362	16261.9	3.74825
2012-08-01	0.13	0.16	1.51242	8.1	5.64	2.29296	2.54	4.91	1.57	2812806	1639413	843597	16207.5	4.50688
2012-09-01	0.14	0.13	1.67742	7.8	5.62	2.33698	2.46	4.84	1.65	2804457	1648403	834979	16302.1	3.12035
2012-10-01	0.16	0.14	1.97721	7.8	5.6	1.85781	2.18	4.58	1.72	2823137	1645334	852039	16271.4	4.71774
2012-11-01	0.16	0.16	1.69922	7.7	5.55333	2.42028	2.2	4.51	1.62	2851362	1646645	883539	16345.7	4.00267
2012-12-01	0.16	0.16	1.62552	7.9	5.50667	2.18366	2.14667	4.63	1.78	2907300	1656930	926558	16459.4	3.1656
2013-01-01	0.14	0.16	1.47398	8	5.46	1.52032	2.39333	4.73	2.02	3008704	1710058	965784	16610.6	2.74464
2013-02-01	0.15	0.14	1.61836	7.7	5.41	1.78856	2.54	4.85	1.89	3090600	1749545	1015914	16520.5	4.35988
2013-03-01	0.14	0.15	1.29142	7.5	5.36	2.68174	2.29	4.85	1.87	3202256	1794459	1070932	16577.6	2.52822
2013-04-01	0.15	0.14	1.07945	7.6	5.31	1.77917	2.14	4.59	1.7	3318649	1836227	1136007	16592.6	2.57755
2013-05-01	0.11	0.15	1.2591	7.5	5.27333	1.65452	2.29	4.73	2.16	3385128	1883559	1164934	16584.2	2.39768
2013-06-01	0.09	0.11	1.52852	7.5	5.23667	1.89989	2.22667	5.19	2.52	3478672	1928416	1208116	16737	1.05291
2013-07-01	0.09	0.09	1.61821	7.3	5.2	1.12805	2.26333	5.32	2.6	3571797	1982407	1246964	16784.2	0.928869
2013-08-01	0.08	0.09	1.43392	7.2	5.16333	2.27439	2.1	5.42	2.78	3644456	2023610	1291341	16873.3	0.142933
2013-09-01	0.08	0.08	1.16658	7.2	5.12667	2.78594	2.03667	5.47	2.64	3734018	2062004	1342004	16888.8	0.705913
2013-10-01	0.09	0.08	1.03797	7.2	5.09	2.42171	2.07333	5.31	2.57	3843396	2117750	1393687	16997.7	-0.0590462
2013-11-01	0.08	0.09	1.2643	6.9	5.05333	2.23884	2.11	5.38	2.75	3925876	2163666	1439854	17123.1	-0.163321
2013-12-01	0.09	0.08	1.48221	6.7	5.01667	2.22736	1.84667	5.38	3.04	4032575	2208829	1496943	17128.7	0.683094
2014-01-01	0.07	0.09	1.47936	6.6	4.98	1.8115	1.68333	5.19	2.67	4102138	2243176	1532224	17023.5	2.42584
2014-02-01	0.07	0.07	1.16849	6.7	4.95	2.14451	1.62	5.1	2.66	4159972	2278256	1570067	17111.5	1.47097
2014-03-01	0.08	0.07	1.50461	6.7	4.92	2.72121	1.75	5.06	2.73	4226971	2311539	1603104	17173.7	1.57528
2014-04-01	0.09	0.08	1.78119	6.2	4.89	2.99651	1.78	4.9	2.67	4296049	2350272	1631875	17313.9	0.962666
2014-05-01	0.09	0.09	1.88991	6.3	4.86667	3.2485	1.31	4.76	2.48	4322654	2370724	1647982	17430.2	0.598517
2014-06-01	0.1	0.09	1.78508	6.1	4.84333	3.39367	1.43333	4.8	2.53	4368348	2396972	1663897	17533.2	1.28723
2014-07-01	0.09	0.1	1.81147	6.2	4.82	4.05625	1.25667	4.73	2.58	4406637	2420285	1674363	17650.6	1.25702
2014-08-01	0.09	0.09	1.6422	6.1	4.8	3.23354	1.38	4.69	2.35	4413736	2435932	1678312	17777.7	0.830935
2014-09-01	0.09	0.09	1.62777	5.9	4.78	3.03222	1.3	4.8	2.52	4459050	2448625	1706282	17731.2	0.958839
2014-10-01	0.09	0.09	1.43037	5.7	4.76	3.19044	1.12	4.69	2.35	4486754	2461580	1717888	17830.3	0.812477
2014-11-01	0.09	0.09	1.19453	5.8	4.74667	3.69474	0.94	4.79	2.18	4485931	2461645	1729790	17850.7	0.589085
2014-12-01	0.12	0.09	0.83853	5.6	4.73333	3.22608	1.05333	4.74	2.17	4497660	2461364	1736832	17834.3	-0.13077
2015-01-01	0.11	0.12	0.18284	5.7	4.72	3.08835	0.866667	4.45	1.68	4500064	2460804	1738672	17884.8	-1.89936
2015-02-01	0.11	0.11	0.28924	5.5	4.71	1.75451	0.98	4.51	2	4486725	2460167	1740208	18032.5	-2.25985
2015-03-01	0.11	0.11	0.28086	5.4	4.7	0.47452	0.79	4.54	1.94	4480603	2459666	1731909	17994	-1.73269
2015-04-01	0.12	0.11	0.16352	5.4	4.69	-0.17366	0.7	4.48	2.05	4471499	2460034	1718850	18166.2	-1.91936
2015-05-01	0.12	0.12	0.23028	5.6	4.68	-0.94196	0.71	4.89	2.12	4463981	2460639	1722434	18201.6	-1.80245
2015-06-01	0.13	0.12	0.31154	5.3	4.67	-1.63108	0.92	5.13	2.35	4495055	2460911	1746393	18296	-2.08716
2015-07-01	0.13	0.13	0.24324	5.2	4.66	-1.24724	0.63	5.2	2.2	4485480	2461502	1734834	18288.7	-1.73805
2015-08-01	0.14	0.13	0.25684	5.1	4.65333	-1.27788	0.54	5.19	2.21	4475105	2461876	1736612	18315.3	-0.350718
2015-09-01	0.14	0.14	0.08333	5	4.64667	-1.94979	0.446667	5.34	2.06	4484111	2461948	1741233	18389.3	-0.217581
2015-10-01	0.12	0.14	0.09401	5	4.64	-2.32339	0.353333	5.34	2.16	4489339	2461800	1744091	18387.8	1.16155
2015-11-01	0.12	0.12	0.23182	5.1	4.63667	-3.68516	0.36	5.46	2.21	4477088	2461628	1744789	18324.1	2.23887
2015-12-01	0.24	0.12	0.30406	5	4.63333	-3.97509	0.463333	5.46	2.27	4486587	2461554	1747467	18351.2	2.59451
2016-01-01	0.34	0.24	0.82077	4.9	4.63	-2.68783	0.366667	5.45	1.94	4482349	2461341	1744179	18359.4	3.43815
2016-02-01	0.38	0.34	0.5924	4.9	4.62667	-2.91825	0.27	5.34	1.74	4489796	2461211	1760918	18323.2	4.68881
2016-03-01	0.36	0.38	0.63211	5	4.62333	-3.37258	0.273333	5.13	1.78	4482840	2461326	1753082	18544.8	3.42422
2016-04-01	0.37	0.36	0.88718	5	4.62	-2.68983	0.376667	4.79	1.83	4474665	2461413	1744826	18632.9	4.09663
2016-05-01	0.37	0.37	0.79588	4.8	4.62	-2.37	0.38	4.68	1.84	4461111	2461637	1743074	18607.4	4.77932
2016-06-01	0.38	0.37	0.79241	4.9	4.62	-1.67954	0.18	4.53	1.49	4466482	2462303	1743541	18681.9	5.2223
2016-07-01	0.39	0.38	0.75115	4.8	4.62	-2.01527	0.28	4.22	1.46	4464498	2462763	1741091	18672.2	5.58169
2016-08-01	0.4	0.39	0.90099	4.9	4.62	-1.98441	0.18	4.24	1.58	4457907	2463645	1743982	18820.7	4.20878
2016-09-01	0.4	0.4	1.22569	5	4.62	-1.73309	0.28	4.31	1.6	4452002	2463460	1736875	18906	3.45332
2016-10-01	0.4	0.4	1.46407	4.9	4.62	-1.25894	0.38	4.38	1.84	4454326	2463544	1735841	18852.2	3.05931
2016-11-01	0.41	0.4	1.44092	4.7	4.62	-0.87898	0.28	4.71	2.37	4446307	2463861	1740674	19018.2	0.92478
2016-12-01	0.54	0.41	1.70842	4.7	4.62	0.5066	0.08	4.83	2.45	4451451	2463601	1741387	19067.4	-0.0427002
2017-01-01	0.65	0.54	2.03667	4.7	4.62	-0.47762	0.08	4.66	2.45	4452838	2463462	1744594	19090.1	-0.970319
2017-02-01	0.66	0.65	2.18903	4.7	4.62333	-0.18125	0.08	4.64	2.36	4468702	2463456	1773621	19132.3	-1.62254
2017-03-01	0.79	0.66	1.90083	4.4	4.62667	1.16415	0.0766667	4.68	2.4	4469618	2464335	1769118	19265.3	-1.29255
2017-04-01	0.9	0.79	1.83871	4.4	4.63	1.93311	-0.226667	4.57	2.29	4470142	2464730	1769013	19213.8	-0.735335
2017-05-01	0.91	0.9	1.65998	4.4	4.62667	2.07773	-0.23	4.55	2.21	4459914	2464696	1770958	19383.4	-1.4364
2017-06-01	1.04	0.91	1.57715	4.3	4.62333	1.78857	-0.226667	4.37	2.31	4463347	2465046	1770280	19480.2	-1.18962
2017-07-01	1.15	1.04	1.56019	4.3	4.62	1.4461	-0.323333	4.39	2.3	4465284	2465170	1768999	19477.3	-0.885669
2017-08-01	1.16	1.15	1.62876	4.4	4.62	1.10733	-0.32	4.31	2.12	4452360	2465300	1767553	19594.2	-0.971817
2017-09-01	1.15	1.16	1.87939	4.2	4.62	1.22201	-0.22	4.3	2.33	4455661	2465427	1768160	19692.6	-1.30915
2017-10-01	1.15	1.15	1.81895	4.1	4.62	2.65443	-0.42	4.32	2.38	4461117	2465727	1770563	19712.5	-2.00761
2017-11-01	1.16	1.15	1.95944	4.2	4.62	3.40275	-0.52	4.27	2.42	4438592	2456959	1767095	19866.7	-0.659223
2017-12-01	1.3	1.16	1.8835	4.1	4.62	2.90122	-0.42	4.22	2.4	4448680	2454219	1764926	19916.3	0.578682
2018-01-01	1.41	1.3	1.84423	4.1	4.62	2.82604	-0.52	4.26	2.72	4419225	2436211	1760743	19988.9	1.54492
2018-02-01	1.42	1.41	1.96394	4.1	4.62	3.67981	-0.52	4.51	2.87	4393401	2424242	1759972	20051.7	1.62199
2018-03-01	1.51	1.42	2.17738	4	4.62	3.62643	-0.52	4.64	2.74	4392198	2424883	1754368	20082.5	2.35489
2018-04-01	1.69	1.51	2.15261	3.9	4.62	3.80621	-0.62	4.67	2.95	4372886	2413218	1744967	20279.4	1.23253
2018-05-01	1.7	1.69	2.36512	3.8	4.62	2.95626	-0.72	4.83	2.83	4327519	2387103	1734588	20457.5	1.06039
2018-06-01	1.82	1.7	2.38428	4	4.62	3.53981	-0.82	4.83	2.85	4305491	2378250	1721271	20499.1	1.19855
2018-07-01	1.91	1.82	2.44038	3.9	4.62	4.12486	-0.62	4.79	2.96	4277681	2359893	1709528	20636.6	0.320844
2018-08-01	1.91	1.91	2.2786	3.8	4.61667	5.42174	-0.72	4.77	2.86	4218914	2324589	1697006	20638.5	1.24973
2018-09-01	1.95	1.91	2.06534	3.7	4.61333	5.58289	-0.816667	4.88	3.05	4192909	2313208	1681763	20677.8	1.8873
2018-10-01	2.19	1.95	2.11356	3.8	4.61	4.18462	-0.913333	5.07	3.15	4139731	2270399	1668989	20777.4	1.80157
