# Supplementary material for: Optimal Macroeconomic Policy in Nonlinear Models: A VSTAR Perspective
Source: publisher site journal article supplement (doi:10.1515/snde-2024-0100), 2025-10-08
Supplement: Supplementary file 5 [file BAA.xls]

## Sheet: FRED Graph
FRED Graph Observations
Federal Reserve Economic Data
Link: https://fred.stlouisfed.org
Help: https://fred.stlouisfed.org/help-faq
Economic Research Division
Federal Reserve Bank of St. Louis
BAA	Moody's Seasoned Baa Corporate Bond Yield, Percent, Monthly, Not Seasonally Adjusted
Frequency: Monthly
observation_date	BAA
1978-01-01	9.17
1978-02-01	9.2
1978-03-01	9.22
1978-04-01	9.32
1978-05-01	9.49
1978-06-01	9.6
1978-07-01	9.6
1978-08-01	9.48
1978-09-01	9.42
1978-10-01	9.59
1978-11-01	9.83
1978-12-01	9.94
1979-01-01	10.13
1979-02-01	10.08
1979-03-01	10.26
1979-04-01	10.33
1979-05-01	10.47
1979-06-01	10.38
1979-07-01	10.29
1979-08-01	10.35
1979-09-01	10.54
1979-10-01	11.4
1979-11-01	11.99
1979-12-01	12.06
1980-01-01	12.42
1980-02-01	13.57
1980-03-01	14.45
1980-04-01	14.19
1980-05-01	13.17
1980-06-01	12.71
1980-07-01	12.65
1980-08-01	13.15
1980-09-01	13.7
1980-10-01	14.23
1980-11-01	14.64
1980-12-01	15.14
1981-01-01	15.03
1981-02-01	15.37
1981-03-01	15.34
1981-04-01	15.56
1981-05-01	15.95
1981-06-01	15.8
1981-07-01	16.17
1981-08-01	16.34
1981-09-01	16.92
1981-10-01	17.11
1981-11-01	16.39
1981-12-01	16.55
1982-01-01	17.1
1982-02-01	17.18
1982-03-01	16.82
1982-04-01	16.78
1982-05-01	16.64
1982-06-01	16.92
1982-07-01	16.8
1982-08-01	16.32
1982-09-01	15.63
1982-10-01	14.73
1982-11-01	14.3
1982-12-01	14.14
1983-01-01	13.94
1983-02-01	13.95
1983-03-01	13.61
1983-04-01	13.29
1983-05-01	13.09
1983-06-01	13.37
1983-07-01	13.39
1983-08-01	13.64
1983-09-01	13.55
1983-10-01	13.46
1983-11-01	13.61
1983-12-01	13.75
1984-01-01	13.65
1984-02-01	13.59
1984-03-01	13.99
1984-04-01	14.31
1984-05-01	14.74
1984-06-01	15.05
1984-07-01	15.15
1984-08-01	14.63
1984-09-01	14.35
1984-10-01	13.94
1984-11-01	13.48
1984-12-01	13.4
1985-01-01	13.26
1985-02-01	13.23
1985-03-01	13.69
1985-04-01	13.51
1985-05-01	13.15
1985-06-01	12.4
1985-07-01	12.43
1985-08-01	12.5
1985-09-01	12.48
1985-10-01	12.36
1985-11-01	11.99
1985-12-01	11.58
1986-01-01	11.44
1986-02-01	11.11
1986-03-01	10.5
1986-04-01	10.19
1986-05-01	10.29
1986-06-01	10.34
1986-07-01	10.16
1986-08-01	10.18
1986-09-01	10.2
1986-10-01	10.24
1986-11-01	10.07
1986-12-01	9.97
1987-01-01	9.72
1987-02-01	9.65
1987-03-01	9.61
1987-04-01	10.04
1987-05-01	10.51
1987-06-01	10.52
1987-07-01	10.61
1987-08-01	10.8
1987-09-01	11.31
1987-10-01	11.62
1987-11-01	11.23
1987-12-01	11.29
1988-01-01	11.07
1988-02-01	10.62
1988-03-01	10.57
1988-04-01	10.9
1988-05-01	11.04
1988-06-01	11
1988-07-01	11.11
1988-08-01	11.21
1988-09-01	10.9
1988-10-01	10.41
1988-11-01	10.48
1988-12-01	10.65
1989-01-01	10.65
1989-02-01	10.61
1989-03-01	10.67
1989-04-01	10.61
1989-05-01	10.46
1989-06-01	10.03
1989-07-01	9.87
1989-08-01	9.88
1989-09-01	9.91
1989-10-01	9.81
1989-11-01	9.81
1989-12-01	9.82
1990-01-01	9.94
1990-02-01	10.14
1990-03-01	10.21
1990-04-01	10.3
1990-05-01	10.41
1990-06-01	10.22
1990-07-01	10.2
1990-08-01	10.41
1990-09-01	10.64
1990-10-01	10.74
1990-11-01	10.62
1990-12-01	10.43
1991-01-01	10.45
1991-02-01	10.07
1991-03-01	10.09
1991-04-01	9.94
1991-05-01	9.86
1991-06-01	9.96
1991-07-01	9.89
1991-08-01	9.65
1991-09-01	9.51
1991-10-01	9.49
1991-11-01	9.45
1991-12-01	9.26
1992-01-01	9.13
1992-02-01	9.23
1992-03-01	9.25
1992-04-01	9.21
1992-05-01	9.13
1992-06-01	9.05
1992-07-01	8.84
1992-08-01	8.65
1992-09-01	8.62
1992-10-01	8.84
1992-11-01	8.96
1992-12-01	8.81
1993-01-01	8.67
1993-02-01	8.39
1993-03-01	8.15
1993-04-01	8.14
1993-05-01	8.21
1993-06-01	8.07
1993-07-01	7.93
1993-08-01	7.6
1993-09-01	7.34
1993-10-01	7.31
1993-11-01	7.66
1993-12-01	7.69
1994-01-01	7.65
1994-02-01	7.76
1994-03-01	8.13
1994-04-01	8.52
1994-05-01	8.62
1994-06-01	8.65
1994-07-01	8.8
1994-08-01	8.74
1994-09-01	8.98
1994-10-01	9.2
1994-11-01	9.32
1994-12-01	9.1
1995-01-01	9.08
1995-02-01	8.85
1995-03-01	8.7
1995-04-01	8.6
1995-05-01	8.2
1995-06-01	7.9
1995-07-01	8.04
1995-08-01	8.19
1995-09-01	7.93
1995-10-01	7.75
1995-11-01	7.68
1995-12-01	7.49
1996-01-01	7.47
1996-02-01	7.63
1996-03-01	8.03
1996-04-01	8.19
1996-05-01	8.3
1996-06-01	8.4
1996-07-01	8.35
1996-08-01	8.18
1996-09-01	8.35
1996-10-01	8.07
1996-11-01	7.79
1996-12-01	7.89
1997-01-01	8.09
1997-02-01	7.94
1997-03-01	8.18
1997-04-01	8.34
1997-05-01	8.2
1997-06-01	8.02
1997-07-01	7.75
1997-08-01	7.82
1997-09-01	7.7
1997-10-01	7.57
1997-11-01	7.42
1997-12-01	7.32
1998-01-01	7.19
1998-02-01	7.25
1998-03-01	7.32
1998-04-01	7.33
1998-05-01	7.3
1998-06-01	7.13
1998-07-01	7.15
1998-08-01	7.14
1998-09-01	7.09
1998-10-01	7.18
1998-11-01	7.34
1998-12-01	7.23
1999-01-01	7.29
1999-02-01	7.39
1999-03-01	7.53
1999-04-01	7.48
1999-05-01	7.72
1999-06-01	8.02
1999-07-01	7.95
1999-08-01	8.15
1999-09-01	8.2
1999-10-01	8.38
1999-11-01	8.15
1999-12-01	8.19
2000-01-01	8.33
2000-02-01	8.29
2000-03-01	8.37
2000-04-01	8.4
2000-05-01	8.9
2000-06-01	8.48
2000-07-01	8.35
2000-08-01	8.26
2000-09-01	8.35
2000-10-01	8.34
2000-11-01	8.28
2000-12-01	8.02
2001-01-01	7.93
2001-02-01	7.87
2001-03-01	7.84
2001-04-01	8.07
2001-05-01	8.07
2001-06-01	7.97
2001-07-01	7.97
2001-08-01	7.85
2001-09-01	8.03
2001-10-01	7.91
2001-11-01	7.81
2001-12-01	8.05
2002-01-01	7.87
2002-02-01	7.89
2002-03-01	8.11
2002-04-01	8.03
2002-05-01	8.09
2002-06-01	7.95
2002-07-01	7.9
2002-08-01	7.58
2002-09-01	7.4
2002-10-01	7.73
2002-11-01	7.62
2002-12-01	7.45
2003-01-01	7.35
2003-02-01	7.06
2003-03-01	6.95
2003-04-01	6.85
2003-05-01	6.38
2003-06-01	6.19
2003-07-01	6.62
2003-08-01	7.01
2003-09-01	6.79
2003-10-01	6.73
2003-11-01	6.66
2003-12-01	6.6
2004-01-01	6.44
2004-02-01	6.27
2004-03-01	6.11
2004-04-01	6.46
2004-05-01	6.75
2004-06-01	6.78
2004-07-01	6.62
2004-08-01	6.46
2004-09-01	6.27
2004-10-01	6.21
2004-11-01	6.2
2004-12-01	6.15
2005-01-01	6.02
2005-02-01	5.82
2005-03-01	6.06
2005-04-01	6.05
2005-05-01	6.01
2005-06-01	5.86
2005-07-01	5.95
2005-08-01	5.96
2005-09-01	6.03
2005-10-01	6.3
2005-11-01	6.39
2005-12-01	6.32
2006-01-01	6.24
2006-02-01	6.27
2006-03-01	6.41
2006-04-01	6.68
2006-05-01	6.75
2006-06-01	6.78
2006-07-01	6.76
2006-08-01	6.59
2006-09-01	6.43
2006-10-01	6.42
2006-11-01	6.2
2006-12-01	6.22
2007-01-01	6.34
2007-02-01	6.28
2007-03-01	6.27
2007-04-01	6.39
2007-05-01	6.39
2007-06-01	6.7
2007-07-01	6.65
2007-08-01	6.65
2007-09-01	6.59
2007-10-01	6.48
2007-11-01	6.4
2007-12-01	6.65
2008-01-01	6.54
2008-02-01	6.82
2008-03-01	6.89
2008-04-01	6.97
2008-05-01	6.93
2008-06-01	7.07
2008-07-01	7.16
2008-08-01	7.15
2008-09-01	7.31
2008-10-01	8.88
2008-11-01	9.21
2008-12-01	8.43
2009-01-01	8.14
2009-02-01	8.08
2009-03-01	8.42
2009-04-01	8.39
2009-05-01	8.06
2009-06-01	7.5
2009-07-01	7.09
2009-08-01	6.58
2009-09-01	6.31
2009-10-01	6.29
2009-11-01	6.32
2009-12-01	6.37
2010-01-01	6.25
2010-02-01	6.34
2010-03-01	6.27
2010-04-01	6.25
2010-05-01	6.05
2010-06-01	6.23
2010-07-01	6.01
2010-08-01	5.66
2010-09-01	5.66
2010-10-01	5.72
2010-11-01	5.92
2010-12-01	6.1
2011-01-01	6.09
2011-02-01	6.15
2011-03-01	6.03
2011-04-01	6.02
2011-05-01	5.78
2011-06-01	5.75
2011-07-01	5.76
2011-08-01	5.36
2011-09-01	5.27
2011-10-01	5.37
2011-11-01	5.14
2011-12-01	5.25
2012-01-01	5.23
2012-02-01	5.14
2012-03-01	5.23
2012-04-01	5.19
2012-05-01	5.07
2012-06-01	5.02
2012-07-01	4.87
2012-08-01	4.91
2012-09-01	4.84
2012-10-01	4.58
2012-11-01	4.51
2012-12-01	4.63
2013-01-01	4.73
2013-02-01	4.85
2013-03-01	4.85
2013-04-01	4.59
2013-05-01	4.73
2013-06-01	5.19
2013-07-01	5.32
2013-08-01	5.42
2013-09-01	5.47
2013-10-01	5.31
2013-11-01	5.38
2013-12-01	5.38
2014-01-01	5.19
2014-02-01	5.1
2014-03-01	5.06
2014-04-01	4.9
2014-05-01	4.76
2014-06-01	4.8
2014-07-01	4.73
2014-08-01	4.69
2014-09-01	4.8
2014-10-01	4.69
2014-11-01	4.79
2014-12-01	4.74
2015-01-01	4.45
2015-02-01	4.51
2015-03-01	4.54
2015-04-01	4.48
2015-05-01	4.89
2015-06-01	5.13
2015-07-01	5.2
2015-08-01	5.19
2015-09-01	5.34
2015-10-01	5.34
2015-11-01	5.46
2015-12-01	5.46
2016-01-01	5.45
2016-02-01	5.34
2016-03-01	5.13
2016-04-01	4.79
2016-05-01	4.68
2016-06-01	4.53
2016-07-01	4.22
2016-08-01	4.24
2016-09-01	4.31
2016-10-01	4.38
2016-11-01	4.71
2016-12-01	4.83
2017-01-01	4.66
2017-02-01	4.64
2017-03-01	4.68
2017-04-01	4.57
2017-05-01	4.55
2017-06-01	4.37
2017-07-01	4.39
2017-08-01	4.31
2017-09-01	4.3
2017-10-01	4.32
2017-11-01	4.27
2017-12-01	4.22
2018-01-01	4.26
2018-02-01	4.51
2018-03-01	4.64
2018-04-01	4.67
2018-05-01	4.83
2018-06-01	4.83
2018-07-01	4.79
2018-08-01	4.77
2018-09-01	4.88
2018-10-01	5.07
2018-11-01	5.22
2018-12-01	5.13
