# Supplementary material for: Optimal Macroeconomic Policy in Nonlinear Models: A VSTAR Perspective
Source: publisher site journal article supplement (doi:10.1515/snde-2024-0100), 2025-10-08
Supplement: Supplementary file 6 [file DGS10.xls]

## Sheet: FRED Graph
FRED Graph Observations
Federal Reserve Economic Data
Link: https://fred.stlouisfed.org
Help: https://fred.stlouisfed.org/help-faq
Economic Research Division
Federal Reserve Bank of St. Louis
DGS10	10-Year Treasury Constant Maturity Rate, Percent, Monthly, Not Seasonally Adjusted
Frequency: Monthly
observation_date	DGS10
1978-01-01	7.94
1978-02-01	8.04
1978-03-01	8.15
1978-04-01	8.24
1978-05-01	8.42
1978-06-01	8.62
1978-07-01	8.56
1978-08-01	8.39
1978-09-01	8.56
1978-10-01	8.96
1978-11-01	8.86
1978-12-01	9.15
1979-01-01	8.95
1979-02-01	9.17
1979-03-01	9.11
1979-04-01	9.35
1979-05-01	9.06
1979-06-01	8.81
1979-07-01	9.01
1979-08-01	9.24
1979-09-01	9.44
1979-10-01	10.72
1979-11-01	10.38
1979-12-01	10.33
1980-01-01	11.13
1980-02-01	12.72
1980-03-01	12.64
1980-04-01	10.76
1980-05-01	10.25
1980-06-01	10.09
1980-07-01	10.76
1980-08-01	11.55
1980-09-01	11.86
1980-10-01	12.46
1980-11-01	12.72
1980-12-01	12.43
1981-01-01	12.68
1981-02-01	13.43
1981-03-01	13.13
1981-04-01	14.11
1981-05-01	13.5
1981-06-01	13.86
1981-07-01	14.67
1981-08-01	15.41
1981-09-01	15.84
1981-10-01	14.63
1981-11-01	13.13
1981-12-01	13.98
1982-01-01	14.14
1982-02-01	14.03
1982-03-01	14.18
1982-04-01	13.87
1982-05-01	13.71
1982-06-01	14.44
1982-07-01	13.68
1982-08-01	12.81
1982-09-01	11.73
1982-10-01	10.71
1982-11-01	10.79
1982-12-01	10.36
1983-01-01	10.8
1983-02-01	10.27
1983-03-01	10.62
1983-04-01	10.27
1983-05-01	10.81
1983-06-01	10.96
1983-07-01	11.76
1983-08-01	11.98
1983-09-01	11.44
1983-10-01	11.74
1983-11-01	11.63
1983-12-01	11.82
1984-01-01	11.67
1984-02-01	12.04
1984-03-01	12.53
1984-04-01	12.82
1984-05-01	13.91
1984-06-01	13.84
1984-07-01	12.91
1984-08-01	12.79
1984-09-01	12.47
1984-10-01	11.79
1984-11-01	11.58
1984-12-01	11.55
1985-01-01	11.17
1985-02-01	11.91
1985-03-01	11.65
1985-04-01	11.41
1985-05-01	10.28
1985-06-01	10.25
1985-07-01	10.57
1985-08-01	10.28
1985-09-01	10.31
1985-10-01	10.01
1985-11-01	9.59
1985-12-01	9
1986-01-01	9.08
1986-02-01	8.13
1986-03-01	7.39
1986-04-01	7.38
1986-05-01	8.05
1986-06-01	7.35
1986-07-01	7.34
1986-08-01	6.95
1986-09-01	7.45
1986-10-01	7.34
1986-11-01	7.15
1986-12-01	7.23
1987-01-01	7.18
1987-02-01	7.19
1987-03-01	7.51
1987-04-01	8.21
1987-05-01	8.49
1987-06-01	8.38
1987-07-01	8.66
1987-08-01	9
1987-09-01	9.63
1987-10-01	8.88
1987-11-01	8.99
1987-12-01	8.83
1988-01-01	8.26
1988-02-01	8.16
1988-03-01	8.57
1988-04-01	8.87
1988-05-01	9.2
1988-06-01	8.82
1988-07-01	9.12
1988-08-01	9.25
1988-09-01	8.87
1988-10-01	8.65
1988-11-01	9.06
1988-12-01	9.14
1989-01-01	9.01
1989-02-01	9.32
1989-03-01	9.3
1989-04-01	9.02
1989-05-01	8.6
1989-06-01	8.1
1989-07-01	7.82
1989-08-01	8.26
1989-09-01	8.31
1989-10-01	7.92
1989-11-01	7.84
1989-12-01	7.93
1990-01-01	8.43
1990-02-01	8.51
1990-03-01	8.65
1990-04-01	9.04
1990-05-01	8.6
1990-06-01	8.43
1990-07-01	8.36
1990-08-01	8.86
1990-09-01	8.82
1990-10-01	8.65
1990-11-01	8.26
1990-12-01	8.08
1991-01-01	8.03
1991-02-01	8.02
1991-03-01	8.05
1991-04-01	8.02
1991-05-01	8.06
1991-06-01	8.24
1991-07-01	8.2
1991-08-01	7.82
1991-09-01	7.47
1991-10-01	7.47
1991-11-01	7.38
1991-12-01	6.71
1992-01-01	7.31
1992-02-01	7.27
1992-03-01	7.54
1992-04-01	7.61
1992-05-01	7.33
1992-06-01	7.14
1992-07-01	6.72
1992-08-01	6.62
1992-09-01	6.37
1992-10-01	6.8
1992-11-01	6.95
1992-12-01	6.7
1993-01-01	6.39
1993-02-01	6.03
1993-03-01	6.03
1993-04-01	6.05
1993-05-01	6.16
1993-06-01	5.8
1993-07-01	5.83
1993-08-01	5.45
1993-09-01	5.4
1993-10-01	5.43
1993-11-01	5.83
1993-12-01	5.83
1994-01-01	5.7
1994-02-01	6.15
1994-03-01	6.77
1994-04-01	7.06
1994-05-01	7.17
1994-06-01	7.34
1994-07-01	7.12
1994-08-01	7.19
1994-09-01	7.62
1994-10-01	7.81
1994-11-01	7.91
1994-12-01	7.84
1995-01-01	7.6
1995-02-01	7.22
1995-03-01	7.2
1995-04-01	7.07
1995-05-01	6.3
1995-06-01	6.21
1995-07-01	6.45
1995-08-01	6.28
1995-09-01	6.17
1995-10-01	6.03
1995-11-01	5.76
1995-12-01	5.58
1996-01-01	5.6
1996-02-01	6.13
1996-03-01	6.34
1996-04-01	6.66
1996-05-01	6.85
1996-06-01	6.73
1996-07-01	6.8
1996-08-01	6.96
1996-09-01	6.72
1996-10-01	6.37
1996-11-01	6.06
1996-12-01	6.43
1997-01-01	6.53
1997-02-01	6.56
1997-03-01	6.92
1997-04-01	6.72
1997-05-01	6.67
1997-06-01	6.51
1997-07-01	6.02
1997-08-01	6.34
1997-09-01	6.12
1997-10-01	5.84
1997-11-01	5.86
1997-12-01	5.75
1998-01-01	5.53
1998-02-01	5.62
1998-03-01	5.67
1998-04-01	5.68
1998-05-01	5.56
1998-06-01	5.44
1998-07-01	5.5
1998-08-01	5.05
1998-09-01	4.44
1998-10-01	4.64
1998-11-01	4.74
1998-12-01	4.65
1999-01-01	4.66
1999-02-01	5.29
1999-03-01	5.25
1999-04-01	5.36
1999-05-01	5.64
1999-06-01	5.81
1999-07-01	5.92
1999-08-01	5.98
1999-09-01	5.9
1999-10-01	6.02
1999-11-01	6.18
1999-12-01	6.45
2000-01-01	6.68
2000-02-01	6.42
2000-03-01	6.03
2000-04-01	6.23
2000-05-01	6.29
2000-06-01	6.03
2000-07-01	6.04
2000-08-01	5.73
2000-09-01	5.8
2000-10-01	5.77
2000-11-01	5.48
2000-12-01	5.12
2001-01-01	5.19
2001-02-01	4.92
2001-03-01	4.93
2001-04-01	5.35
2001-05-01	5.43
2001-06-01	5.42
2001-07-01	5.07
2001-08-01	4.85
2001-09-01	4.6
2001-10-01	4.3
2001-11-01	4.78
2001-12-01	5.07
2002-01-01	5.07
2002-02-01	4.88
2002-03-01	5.42
2002-04-01	5.11
2002-05-01	5.08
2002-06-01	4.86
2002-07-01	4.51
2002-08-01	4.14
2002-09-01	3.63
2002-10-01	3.93
2002-11-01	4.22
2002-12-01	3.83
2003-01-01	4
2003-02-01	3.71
2003-03-01	3.83
2003-04-01	3.89
2003-05-01	3.37
2003-06-01	3.54
2003-07-01	4.49
2003-08-01	4.45
2003-09-01	3.96
2003-10-01	4.33
2003-11-01	4.34
2003-12-01	4.27
2004-01-01	4.16
2004-02-01	3.99
2004-03-01	3.86
2004-04-01	4.53
2004-05-01	4.66
2004-06-01	4.62
2004-07-01	4.5
2004-08-01	4.13
2004-09-01	4.14
2004-10-01	4.05
2004-11-01	4.36
2004-12-01	4.24
2005-01-01	4.14
2005-02-01	4.36
2005-03-01	4.5
2005-04-01	4.21
2005-05-01	4
2005-06-01	3.94
2005-07-01	4.28
2005-08-01	4.02
2005-09-01	4.34
2005-10-01	4.57
2005-11-01	4.49
2005-12-01	4.39
2006-01-01	4.53
2006-02-01	4.55
2006-03-01	4.86
2006-04-01	5.07
2006-05-01	5.12
2006-06-01	5.15
2006-07-01	4.99
2006-08-01	4.74
2006-09-01	4.64
2006-10-01	4.61
2006-11-01	4.46
2006-12-01	4.71
2007-01-01	4.83
2007-02-01	4.56
2007-03-01	4.65
2007-04-01	4.63
2007-05-01	4.9
2007-06-01	5.03
2007-07-01	4.78
2007-08-01	4.54
2007-09-01	4.59
2007-10-01	4.48
2007-11-01	3.97
2007-12-01	4.04
2008-01-01	3.67
2008-02-01	3.53
2008-03-01	3.45
2008-04-01	3.77
2008-05-01	4.06
2008-06-01	3.99
2008-07-01	3.99
2008-08-01	3.83
2008-09-01	3.85
2008-10-01	4.01
2008-11-01	2.93
2008-12-01	2.25
2009-01-01	2.87
2009-02-01	3.02
2009-03-01	2.71
2009-04-01	3.16
2009-05-01	3.47
2009-06-01	3.53
2009-07-01	3.52
2009-08-01	3.4
2009-09-01	3.31
2009-10-01	3.41
2009-11-01	3.21
2009-12-01	3.85
2010-01-01	3.63
2010-02-01	3.61
2010-03-01	3.84
2010-04-01	3.69
2010-05-01	3.31
2010-06-01	2.97
2010-07-01	2.94
2010-08-01	2.47
2010-09-01	2.53
2010-10-01	2.63
2010-11-01	2.81
2010-12-01	3.3
2011-01-01	3.42
2011-02-01	3.42
2011-03-01	3.47
2011-04-01	3.32
2011-05-01	3.05
2011-06-01	3.18
2011-07-01	2.82
2011-08-01	2.23
2011-09-01	1.92
2011-10-01	2.17
2011-11-01	2.08
2011-12-01	1.89
2012-01-01	1.83
2012-02-01	1.98
2012-03-01	2.23
2012-04-01	1.95
2012-05-01	1.59
2012-06-01	1.67
2012-07-01	1.51
2012-08-01	1.57
2012-09-01	1.65
2012-10-01	1.72
2012-11-01	1.62
2012-12-01	1.78
2013-01-01	2.02
2013-02-01	1.89
2013-03-01	1.87
2013-04-01	1.7
2013-05-01	2.16
2013-06-01	2.52
2013-07-01	2.6
2013-08-01	2.78
2013-09-01	2.64
2013-10-01	2.57
2013-11-01	2.75
2013-12-01	3.04
2014-01-01	2.67
2014-02-01	2.66
2014-03-01	2.73
2014-04-01	2.67
2014-05-01	2.48
2014-06-01	2.53
2014-07-01	2.58
2014-08-01	2.35
2014-09-01	2.52
2014-10-01	2.35
2014-11-01	2.18
2014-12-01	2.17
2015-01-01	1.68
2015-02-01	2
2015-03-01	1.94
2015-04-01	2.05
2015-05-01	2.12
2015-06-01	2.35
2015-07-01	2.2
2015-08-01	2.21
2015-09-01	2.06
2015-10-01	2.16
2015-11-01	2.21
2015-12-01	2.27
2016-01-01	1.94
2016-02-01	1.74
2016-03-01	1.78
2016-04-01	1.83
2016-05-01	1.84
2016-06-01	1.49
2016-07-01	1.46
2016-08-01	1.58
2016-09-01	1.6
2016-10-01	1.84
2016-11-01	2.37
2016-12-01	2.45
2017-01-01	2.45
2017-02-01	2.36
2017-03-01	2.4
2017-04-01	2.29
2017-05-01	2.21
2017-06-01	2.31
2017-07-01	2.3
2017-08-01	2.12
2017-09-01	2.33
2017-10-01	2.38
2017-11-01	2.42
2017-12-01	2.4
2018-01-01	2.72
2018-02-01	2.87
2018-03-01	2.74
2018-04-01	2.95
2018-05-01	2.83
2018-06-01	2.85
2018-07-01	2.96
2018-08-01	2.86
2018-09-01	3.05
2018-10-01	3.15
2018-11-01	3.01
2018-12-01	2.69
