# Supplementary material for: Optimal Macroeconomic Policy in Nonlinear Models: A VSTAR Perspective
Source: publisher site journal article supplement (doi:10.1515/snde-2024-0100), 2025-10-08
Supplement: Supplementary file 7 [file DataFedAssets.xlsx]

## Sheet: Sheet1
observation_date	Total Assets	TS	MBS
1978-01-01	138191	97888	0
1978-02-01	139847	98044	0
1978-03-01	137295	99160	0
1978-04-01	141465	102357	0
1978-05-01	139887	102395	0
1978-06-01	150834	106918	0
1978-07-01	140739	103281	0
1978-08-01	150197	109800	0
1978-09-01	155393	113259	0
1978-10-01	156162	114489	0
1978-11-01	152633	112110	0
1978-12-01	158042	109583	0
1979-01-01	144839	101279	0
1979-02-01	145564	103486	0
1979-03-01	145931	104705	0
1979-04-01	152603	105821	0
1979-05-01	154341	106871	0
1979-06-01	153556	106793	0
1979-07-01	149680	107383	0
1979-08-01	155532	113028	0
1979-09-01	155967	113852	0
1979-10-01	155456	114455	0
1979-11-01	159859	116239	0
1979-12-01	157923	112856	0
1980-01-01	152711	112478	0
1980-02-01	154978	112301	0
1980-03-01	159908	117830	0
1980-04-01	163157	118825	0
1980-05-01	168188	121200	0
1980-06-01	160039	119841	0
1980-07-01	161597	119577	0
1980-08-01	160770	118690	0
1980-09-01	164234	120713	0
1980-10-01	164326	120515	0
1980-11-01	165796	119161	0
1980-12-01	168545	119299	0
1981-01-01	158088	115138	0
1981-02-01	163786	116622	0
1981-03-01	165660	118541	0
1981-04-01	178252	120037	0
1981-05-01	164058	117193	0
1981-06-01	165970	119360	0
1981-07-01	167845	120873	0
1981-08-01	164980	122829	0
1981-09-01	169468	124330	0
1981-10-01	166346	121495	0
1981-11-01	171361	126479	0
1981-12-01	178224	127990	0
1982-01-01	175190	126541	0
1982-02-01	168854	126250	0
1982-03-01	169986	123992	0
1982-04-01	180629	128166	0
1982-05-01	169934	128765	0
1982-06-01	171443	127005	0
1982-07-01	175915	132934	0
1982-08-01	178171	134738	0
1982-09-01	173710	130305	0
1982-10-01	176812	132604	0
1982-11-01	179102	134630	0
1982-12-01	187659	134801	0
1983-01-01	179973	133121	0
1983-02-01	185769	133965	0
1983-03-01	179998	134660	0
1983-04-01	189383	137376	0
1983-05-01	184279	140750	0
1983-06-01	185143	140729	0
1983-07-01	186160	143500	0
1983-08-01	191118	144226	0
1983-09-01	193634	145194	0
1983-10-01	190549	147272	0
1983-11-01	192699	149439	0
1983-12-01	199290	152570	0
1984-01-01	197981	149699	0
1984-02-01	186239	140847	0
1984-03-01	188450	145670	0
1984-04-01	208122	154817	0
1984-05-01	200241	153697	0
1984-06-01	197199	152907	0
1984-07-01	197167	150167	0
1984-08-01	196276	149054	0
1984-09-01	202464	153480	0
1984-10-01	197453	148220	0
1984-11-01	203247	155214	0
1984-12-01	206821	161529	0
1985-01-01	201454	155418	0
1985-02-01	200763	155501	0
1985-03-01	202727	159169	0
1985-04-01	213085	166717	0
1985-05-01	210894	164714	0
1985-06-01	210141	166282	0
1985-07-01	215082	167095	0
1985-08-01	213810	167934	0
1985-09-01	220963	170800	0
1985-10-01	208395	161902	0
1985-11-01	215871	167889	0
1985-12-01	229267	177730	0
1986-01-01	229055	178139	0
1986-02-01	222377	175870	0
1986-03-01	224983	174088	0
1986-04-01	233778	174312	0
1986-05-01	233933	181499	0
1986-06-01	229211	181893	0
1986-07-01	232452	184104	0
1986-08-01	233133	185575	0
1986-09-01	237653	186247	0
1986-10-01	236830	188302	0
1986-11-01	242178	191627	0
1986-12-01	266024	197625	0
1987-01-01	257286	201565	0
1987-02-01	239189	190043	0
1987-03-01	242310	194544	0
1987-04-01	266516	204590	0
1987-05-01	266083	205853	0
1987-06-01	264740	210712	0
1987-07-01	253944	206296	0
1987-08-01	259462	205809	0
1987-09-01	261404	211941	0
1987-10-01	273673	211453	0
1987-11-01	261821	215532	0
1987-12-01	273419	218549	0
1988-01-01	268564	218892	0
1988-02-01	259378	214901	0
1988-03-01	262244	215160	0
1988-04-01	274196	222947	0
1988-05-01	263303	215217	0
1988-06-01	278523	223010	0
1988-07-01	270796	220727	0
1988-08-01	273593	222795	0
1988-09-01	283534	226015	0
1988-10-01	275457	224263	0
1988-11-01	284420	228701	0
1988-12-01	293986	233562	0
1989-01-01	288865	232974	0
1989-02-01	279987	224659	0
1989-03-01	280916	227924	0
1989-04-01	292117	236004	0
1989-05-01	285058	223535	0
1989-06-01	296949	231062	0
1989-07-01	285483	219897	0
1989-08-01	282336	216339	0
1989-09-01	288656	220565	0
1989-10-01	282636	211871	0
1989-11-01	301036	228897	0
1989-12-01	310256	233951	0
1990-01-01	292033	218392	0
1990-02-01	291669	219132	0
1990-03-01	294962	220529	0
1990-04-01	297448	223944	0
1990-05-01	300256	224463	0
1990-06-01	304752	230978	0
1990-07-01	304772	231264	0
1990-08-01	306025	233520	0
1990-09-01	310451	236575	0
1990-10-01	315067	237763	0
1990-11-01	317550	244016	0
1990-12-01	319191	241569	0
1991-01-01	312294	236592
1991-02-01	312702	239815
1991-03-01	313781	241238
1991-04-01	309293	239000
1991-05-01	319439	247635
1991-06-01	322369	251189
1991-07-01	317352	249177
1991-08-01	317255	253044
1991-09-01	321214	256361
1991-10-01	322891	257042
1991-11-01	328865	264555
1991-12-01	346625	275934
1992-01-01	329571	261957
1992-02-01	330541	264912
1992-03-01	332524	266994
1992-04-01	331678	267034
1992-05-01	342026	277212
1992-06-01	342422	279196
1992-07-01	338375	274554
1992-08-01	339548	276825
1992-09-01	360681	294986
1992-10-01	346715	282525
1992-11-01	356682	292683
1992-12-01	369089	301342
1993-01-01	357932	297426
1993-02-01	359077	299778
1993-03-01	362161	299440
1993-04-01	367681	305477
1993-05-01	380922	318078
1993-06-01	387030	323714
1993-07-01	374368	312990
1993-08-01	378622	318455
1993-09-01	391523	326938
1993-10-01	386581	322594
1993-11-01	397329	353675
1993-12-01	408578	344321
1994-01-01	400059	334706
1994-02-01	406184	338547
1994-03-01	404746	342254
1994-04-01	406964	343160
1994-05-01	407989	347274
1994-06-01	412606	351622
1994-07-01	412310	350895
1994-08-01	414296	352554
1994-09-01	411876	349846
1994-10-01	420608	357380
1994-11-01	427904	363933
1994-12-01	439979	370962
1995-01-01	423905	361284
1995-02-01	431267	365087
1995-03-01	432342	369324
1995-04-01	444140	378378
1995-05-01	438203	374602
1995-06-01	437955	375686
1995-07-01	434207	368520
1995-08-01	436336	373531
1995-09-01	438858	376139
1995-10-01	441787	377953
1995-11-01	441766	379703
1995-12-01	452557	387865
1996-01-01	435350	372514
1996-02-01	444582	383158
1996-03-01	448163	385023
1996-04-01	463338	397860
1996-05-01	449151	385154
1996-06-01	448412	386748
1996-07-01	447351	385047
1996-08-01	457126	394050
1996-09-01	458886	396783
1996-10-01	454742	390265
1996-11-01	462251	398755
1996-12-01	475002	407289
1997-01-01	471238	405859
1997-02-01	470742	408231
1997-03-01	470517	408528
1997-04-01	487325	422227
1997-05-01	473257	411506
1997-06-01	484672	422859
1997-07-01	480574	417919
1997-08-01	486529	424986
1997-09-01	484194	423549
1997-10-01	480831	418571
1997-11-01	492964	432439
1997-12-01	505142	439182
1998-01-01	500816	436953
1998-02-01	502918	441269
1998-03-01	500541	439854
1998-04-01	534591	468453
1998-05-01	504508	442643
1998-06-01	515138	452990
1998-07-01	511878	449765
1998-08-01	515172	450627
1998-09-01	518410	454434
1998-10-01	516148	450245
1998-11-01	527256	458355
1998-12-01	546322	470321
1999-01-01	534429	464429
1999-02-01	541717	470976
1999-03-01	545923	481757
1999-04-01	545736	480357
1999-05-01	545704	483194
1999-06-01	545850	485293
1999-07-01	554488	489944
1999-08-01	559163	491291
1999-09-01	567937	496239
1999-10-01	572664	492051
1999-11-01	596384	494529
1999-12-01	668906	483417
2000-01-01	595140	499138
2000-02-01	588665	500423
2000-03-01	579454	502762
2000-04-01	608139	507776
2000-05-01	578592	509115
2000-06-01	589559	507884
2000-07-01	584640	507830
2000-08-01	582759	513095
2000-09-01	583123	512472
2000-10-01	582454	511038
2000-11-01	597282	514308
2000-12-01	619724	515491
2001-01-01	611706	518441
2001-02-01	613259	521118
2001-03-01	598010	524946
2001-04-01	603250	527300
2001-05-01	632094	529372
2001-06-01	613887	535191
2001-07-01	630973	536392
2001-08-01	625160	542873
2001-09-01	638318	526817
2001-10-01	634694	544190
2001-11-01	648787	550765
2001-12-01	662945	555997
2002-01-01	657669	562933
2002-02-01	658103	568702
2002-03-01	659092	576093
2002-04-01	663457	582038
2002-05-01	697225	587559
2002-06-01	687160	592390
2002-07-01	688852	600510
2002-08-01	679263	604401
2002-09-01	681578	606248
2002-10-01	692547	608665
2002-11-01	697941	609614
2002-12-01	733107	629402
2003-01-01	712809	629406	0
2003-02-01	721980	635996	0
2003-03-01	725019	640891	0
2003-04-01	746294	647271	0
2003-05-01	744896	650859	0
2003-06-01	744018	651993	0
2003-07-01	740295	652856	0
2003-08-01	740637	653671	0
2003-09-01	741193	655993	0
2003-10-01	747272	658672	0
2003-11-01	756964	664515	0
2003-12-01	771551	666665	0
2004-01-01	755279	667060	0
2004-02-01	750666	671527	0
2004-03-01	760725	674084	0
2004-04-01	772927	676383	0
2004-05-01	771108	680633	0
2004-06-01	779578	687391	0
2004-07-01	773916	693717	0
2004-08-01	775437	694840	0
2004-09-01	786330	698617	0
2004-10-01	791336	706730	0
2004-11-01	809956	711595	0
2004-12-01	810944	717813	0
2005-01-01	807262	717827	0
2005-02-01	804576	717839	0
2005-03-01	807551	717536	0
2005-04-01	809797	718638	0
2005-05-01	810160	722992	0
2005-06-01	810082	726022	0
2005-07-01	814259	724702	0
2005-08-01	823237	730380	0
2005-09-01	823771	736082	0
2005-10-01	819105	739542	0
2005-11-01	835059	744168	0
2005-12-01	847700	744210	0
2006-01-01	828901	746588	0
2006-02-01	840555	752549	0
2006-03-01	833675	758529	0
2006-04-01	844572	759683	0
2006-05-01	851580	762411	0
2006-06-01	844436	766349	0
2006-07-01	841552	764763	0
2006-08-01	850925	766738	0
2006-09-01	849971	768915	0
2006-10-01	852648	768422	0
2006-11-01	856671	772610	0
2006-12-01	869988	778938	0
2007-01-01	865730	778863	0
2007-02-01	877409	780793	0
2007-03-01	869803	780890	0
2007-04-01	879686	787149	0
2007-05-01	876986	790260	0
2007-06-01	865105	790497	0
2007-07-01	863890	790714	0
2007-08-01	872873	784637	0
2007-09-01	889900	779633	0
2007-10-01	883385	779586	0
2007-11-01	879417	779693	0
2007-12-01	890662	754612	0
2008-01-01	900264	718371	0
2008-02-01	893825	713355	0
2008-03-01	893965	612305	0
2008-04-01	888131	548692	0
2008-05-01	904054	491091	0
2008-06-01	892713	478796	0
2008-07-01	918625	479206	0
2008-08-01	909982	479642	0
2008-09-01	1211825	476578	0
2008-10-01	1969086	476469	0
2008-11-01	2106117	476407	0
2008-12-01	2239457	475921	0
2009-01-01	1927082	475129	7377
2009-02-01	1916115	474643	68745
2009-03-01	2071556	474746	236156
2009-04-01	2066712	549046	366153
2009-05-01	2080115	600142	427552
2009-06-01	2025571	653193	467226
2009-07-01	2000547	695758	542888
2009-08-01	2074902	744878	622864
2009-09-01	2141020	769160	692365
2009-10-01	2161537	774561	774066
2009-11-01	2206359	776535	852124
2009-12-01	2234067	776587	908257
2010-01-01	2246886	776619	969728
2010-02-01	2286127	776549	1032560
2010-03-01	2307150	776705	1068697
2010-04-01	2330472	776717	1096416
2010-05-01	2334041	776877	1112910
2010-06-01	2330851	776989	1118127
2010-07-01	2325298	777021	1117474
2010-08-01	2301015	784498	1103167
2010-09-01	2298691	811669	1078539
2010-10-01	2295392	837848	1051037
2010-11-01	2346001	901238	1037803
2010-12-01	2420570	1016102	992141
2011-01-01	2443527	1114448	965077
2011-02-01	2533221	1213425	958201
2011-03-01	2622523	1333445	937155
2011-04-01	2690985	1413467	927021
2011-05-01	2774996	1519327	917856
2011-06-01	2865251	1617060	908853
2011-07-01	2863576	1638161	897285
2011-08-01	2853888	1652113	884945
2011-09-01	2850921	1664655	870883
2011-10-01	2845685	1678012	849261
2011-11-01	2814235	1672038	827052
2011-12-01	2926095	1672092	837295
2012-01-01	2919545	1661529	835624
2012-02-01	2925722	1661601	840795
2012-03-01	2878137	1664911	836786
2012-04-01	2866561	1667766	847796
2012-05-01	2842654	1656675	851750
2012-06-01	2863547	1666530	854979
2012-07-01	2846757	1651432	853362
2012-08-01	2812806	1639413	843597
2012-09-01	2804457	1648403	834979
2012-10-01	2823137	1645334	852039
2012-11-01	2851362	1646645	883539
2012-12-01	2907300	1656930	926558
2013-01-01	3008704	1710058	965784
2013-02-01	3090600	1749545	1015914
2013-03-01	3202256	1794459	1070932
2013-04-01	3318649	1836227	1136007
2013-05-01	3385128	1883559	1164934
2013-06-01	3478672	1928416	1208116
2013-07-01	3571797	1982407	1246964
2013-08-01	3644456	2023610	1291341
2013-09-01	3734018	2062004	1342004
2013-10-01	3843396	2117750	1393687
2013-11-01	3925876	2163666	1439854
2013-12-01	4032575	2208829	1496943
2014-01-01	4102138	2243176	1532224
2014-02-01	4159972	2278256	1570067
2014-03-01	4226971	2311539	1603104
2014-04-01	4296049	2350272	1631875
2014-05-01	4322654	2370724	1647982
2014-06-01	4368348	2396972	1663897
2014-07-01	4406637	2420285	1674363
2014-08-01	4413736	2435932	1678312
2014-09-01	4459050	2448625	1706282
2014-10-01	4486754	2461580	1717888
2014-11-01	4485931	2461645	1729790
2014-12-01	4497660	2461364	1736832
2015-01-01	4500064	2460804	1738672
2015-02-01	4486725	2460167	1740208
2015-03-01	4480603	2459666	1731909
2015-04-01	4471499	2460034	1718850
2015-05-01	4463981	2460639	1722434
2015-06-01	4495055	2460911	1746393
2015-07-01	4485480	2461502	1734834
2015-08-01	4475105	2461876	1736612
2015-09-01	4484111	2461948	1741233
2015-10-01	4489339	2461800	1744091
2015-11-01	4477088	2461628	1744789
2015-12-01	4486587	2461554	1747467
2016-01-01	4482349	2461341	1744179
2016-02-01	4489796	2461211	1760918
2016-03-01	4482840	2461326	1753082
2016-04-01	4474665	2461413	1744826
2016-05-01	4461111	2461637	1743074
2016-06-01	4466482	2462303	1743541
2016-07-01	4464498	2462763	1741091
2016-08-01	4457907	2463645	1743982
2016-09-01	4452002	2463460	1736875
2016-10-01	4454326	2463544	1735841
2016-11-01	4446307	2463861	1740674
2016-12-01	4451451	2463601	1741387
2017-01-01	4452838	2463462	1744594
2017-02-01	4468702	2463456	1773621
2017-03-01	4469618	2464335	1769118
2017-04-01	4470142	2464730	1769013
2017-05-01	4459914	2464696	1770958
2017-06-01	4463347	2465046	1770280
2017-07-01	4465284	2465170	1768999
2017-08-01	4452360	2465300	1767553
2017-09-01	4455661	2465427	1768160
2017-10-01	4461117	2465727	1770563
2017-11-01	4438592	2456959	1767095
2017-12-01	4448680	2454219	1764926
2018-01-01	4419225	2436211	1760743
2018-02-01	4393401	2424242	1759972
2018-03-01	4392198	2424883	1754368
2018-04-01	4372886	2413218	1744967
2018-05-01	4327519	2387103	1734588
2018-06-01	4305491	2378250	1721271
2018-07-01	4277681	2359893	1709528
2018-08-01	4218914	2324589	1697006
2018-09-01	4192909	2313208	1681763
2018-10-01	4139731	2270399	1668989
2018-11-01	4097170	2253117	1653468
2018-12-01	4075636	2240717	1637123
2019-01-01	4047052	2220115	1628895
