# Supplementary material for: Optimal Macroeconomic Policy in Nonlinear Models: A VSTAR Perspective
Source: publisher site journal article supplement (doi:10.1515/snde-2024-0100), 2025-10-08
Supplement: Supplementary file 8 [file FEDFUNDS.xls]

## Sheet: FRED Graph
FRED Graph Observations
Federal Reserve Economic Data
Link: https://fred.stlouisfed.org
Help: https://fred.stlouisfed.org/help-faq
Economic Research Division
Federal Reserve Bank of St. Louis
FEDFUNDS	Effective Federal Funds Rate, Percent, Monthly, Not Seasonally Adjusted
Frequency: Monthly
observation_date	FEDFUNDS
1978-01-01	6.7
1978-02-01	6.78
1978-03-01	6.79
1978-04-01	6.89
1978-05-01	7.36
1978-06-01	7.6
1978-07-01	7.81
1978-08-01	8.04
1978-09-01	8.45
1978-10-01	8.96
1978-11-01	9.76
1978-12-01	10.03
1979-01-01	10.07
1979-02-01	10.06
1979-03-01	10.09
1979-04-01	10.01
1979-05-01	10.24
1979-06-01	10.29
1979-07-01	10.47
1979-08-01	10.94
1979-09-01	11.43
1979-10-01	13.77
1979-11-01	13.18
1979-12-01	13.78
1980-01-01	13.82
1980-02-01	14.13
1980-03-01	17.19
1980-04-01	17.61
1980-05-01	10.98
1980-06-01	9.47
1980-07-01	9.03
1980-08-01	9.61
1980-09-01	10.87
1980-10-01	12.81
1980-11-01	15.85
1980-12-01	18.9
1981-01-01	19.08
1981-02-01	15.93
1981-03-01	14.7
1981-04-01	15.72
1981-05-01	18.52
1981-06-01	19.1
1981-07-01	19.04
1981-08-01	17.82
1981-09-01	15.87
1981-10-01	15.08
1981-11-01	13.31
1981-12-01	12.37
1982-01-01	13.22
1982-02-01	14.78
1982-03-01	14.68
1982-04-01	14.94
1982-05-01	14.45
1982-06-01	14.15
1982-07-01	12.59
1982-08-01	10.12
1982-09-01	10.31
1982-10-01	9.71
1982-11-01	9.2
1982-12-01	8.95
1983-01-01	8.68
1983-02-01	8.51
1983-03-01	8.77
1983-04-01	8.8
1983-05-01	8.63
1983-06-01	8.98
1983-07-01	9.37
1983-08-01	9.56
1983-09-01	9.45
1983-10-01	9.48
1983-11-01	9.34
1983-12-01	9.47
1984-01-01	9.56
1984-02-01	9.59
1984-03-01	9.91
1984-04-01	10.29
1984-05-01	10.32
1984-06-01	11.06
1984-07-01	11.23
1984-08-01	11.64
1984-09-01	11.3
1984-10-01	9.99
1984-11-01	9.43
1984-12-01	8.38
1985-01-01	8.35
1985-02-01	8.5
1985-03-01	8.58
1985-04-01	8.27
1985-05-01	7.97
1985-06-01	7.53
1985-07-01	7.88
1985-08-01	7.9
1985-09-01	7.92
1985-10-01	7.99
1985-11-01	8.05
1985-12-01	8.27
1986-01-01	8.14
1986-02-01	7.86
1986-03-01	7.48
1986-04-01	6.99
1986-05-01	6.85
1986-06-01	6.92
1986-07-01	6.56
1986-08-01	6.17
1986-09-01	5.89
1986-10-01	5.85
1986-11-01	6.04
1986-12-01	6.91
1987-01-01	6.43
1987-02-01	6.1
1987-03-01	6.13
1987-04-01	6.37
1987-05-01	6.85
1987-06-01	6.73
1987-07-01	6.58
1987-08-01	6.73
1987-09-01	7.22
1987-10-01	7.29
1987-11-01	6.69
1987-12-01	6.77
1988-01-01	6.83
1988-02-01	6.58
1988-03-01	6.58
1988-04-01	6.87
1988-05-01	7.09
1988-06-01	7.51
1988-07-01	7.75
1988-08-01	8.01
1988-09-01	8.19
1988-10-01	8.3
1988-11-01	8.35
1988-12-01	8.76
1989-01-01	9.12
1989-02-01	9.36
1989-03-01	9.85
1989-04-01	9.84
1989-05-01	9.81
1989-06-01	9.53
1989-07-01	9.24
1989-08-01	8.99
1989-09-01	9.02
1989-10-01	8.84
1989-11-01	8.55
1989-12-01	8.45
1990-01-01	8.23
1990-02-01	8.24
1990-03-01	8.28
1990-04-01	8.26
1990-05-01	8.18
1990-06-01	8.29
1990-07-01	8.15
1990-08-01	8.13
1990-09-01	8.2
1990-10-01	8.11
1990-11-01	7.81
1990-12-01	7.31
1991-01-01	6.91
1991-02-01	6.25
1991-03-01	6.12
1991-04-01	5.91
1991-05-01	5.78
1991-06-01	5.9
1991-07-01	5.82
1991-08-01	5.66
1991-09-01	5.45
1991-10-01	5.21
1991-11-01	4.81
1991-12-01	4.43
1992-01-01	4.03
1992-02-01	4.06
1992-03-01	3.98
1992-04-01	3.73
1992-05-01	3.82
1992-06-01	3.76
1992-07-01	3.25
1992-08-01	3.3
1992-09-01	3.22
1992-10-01	3.1
1992-11-01	3.09
1992-12-01	2.92
1993-01-01	3.02
1993-02-01	3.03
1993-03-01	3.07
1993-04-01	2.96
1993-05-01	3
1993-06-01	3.04
1993-07-01	3.06
1993-08-01	3.03
1993-09-01	3.09
1993-10-01	2.99
1993-11-01	3.02
1993-12-01	2.96
1994-01-01	3.05
1994-02-01	3.25
1994-03-01	3.34
1994-04-01	3.56
1994-05-01	4.01
1994-06-01	4.25
1994-07-01	4.26
1994-08-01	4.47
1994-09-01	4.73
1994-10-01	4.76
1994-11-01	5.29
1994-12-01	5.45
1995-01-01	5.53
1995-02-01	5.92
1995-03-01	5.98
1995-04-01	6.05
1995-05-01	6.01
1995-06-01	6
1995-07-01	5.85
1995-08-01	5.74
1995-09-01	5.8
1995-10-01	5.76
1995-11-01	5.8
1995-12-01	5.6
1996-01-01	5.56
1996-02-01	5.22
1996-03-01	5.31
1996-04-01	5.22
1996-05-01	5.24
1996-06-01	5.27
1996-07-01	5.4
1996-08-01	5.22
1996-09-01	5.3
1996-10-01	5.24
1996-11-01	5.31
1996-12-01	5.29
1997-01-01	5.25
1997-02-01	5.19
1997-03-01	5.39
1997-04-01	5.51
1997-05-01	5.5
1997-06-01	5.56
1997-07-01	5.52
1997-08-01	5.54
1997-09-01	5.54
1997-10-01	5.5
1997-11-01	5.52
1997-12-01	5.5
1998-01-01	5.56
1998-02-01	5.51
1998-03-01	5.49
1998-04-01	5.45
1998-05-01	5.49
1998-06-01	5.56
1998-07-01	5.54
1998-08-01	5.55
1998-09-01	5.51
1998-10-01	5.07
1998-11-01	4.83
1998-12-01	4.68
1999-01-01	4.63
1999-02-01	4.76
1999-03-01	4.81
1999-04-01	4.74
1999-05-01	4.74
1999-06-01	4.76
1999-07-01	4.99
1999-08-01	5.07
1999-09-01	5.22
1999-10-01	5.2
1999-11-01	5.42
1999-12-01	5.3
2000-01-01	5.45
2000-02-01	5.73
2000-03-01	5.85
2000-04-01	6.02
2000-05-01	6.27
2000-06-01	6.53
2000-07-01	6.54
2000-08-01	6.5
2000-09-01	6.52
2000-10-01	6.51
2000-11-01	6.51
2000-12-01	6.4
2001-01-01	5.98
2001-02-01	5.49
2001-03-01	5.31
2001-04-01	4.8
2001-05-01	4.21
2001-06-01	3.97
2001-07-01	3.77
2001-08-01	3.65
2001-09-01	3.07
2001-10-01	2.49
2001-11-01	2.09
2001-12-01	1.82
2002-01-01	1.73
2002-02-01	1.74
2002-03-01	1.73
2002-04-01	1.75
2002-05-01	1.75
2002-06-01	1.75
2002-07-01	1.73
2002-08-01	1.74
2002-09-01	1.75
2002-10-01	1.75
2002-11-01	1.34
2002-12-01	1.24
2003-01-01	1.24
2003-02-01	1.26
2003-03-01	1.25
2003-04-01	1.26
2003-05-01	1.26
2003-06-01	1.22
2003-07-01	1.01
2003-08-01	1.03
2003-09-01	1.01
2003-10-01	1.01
2003-11-01	1
2003-12-01	0.98
2004-01-01	1
2004-02-01	1.01
2004-03-01	1
2004-04-01	1
2004-05-01	1
2004-06-01	1.03
2004-07-01	1.26
2004-08-01	1.43
2004-09-01	1.61
2004-10-01	1.76
2004-11-01	1.93
2004-12-01	2.16
2005-01-01	2.28
2005-02-01	2.5
2005-03-01	2.63
2005-04-01	2.79
2005-05-01	3
2005-06-01	3.04
2005-07-01	3.26
2005-08-01	3.5
2005-09-01	3.62
2005-10-01	3.78
2005-11-01	4
2005-12-01	4.16
2006-01-01	4.29
2006-02-01	4.49
2006-03-01	4.59
2006-04-01	4.79
2006-05-01	4.94
2006-06-01	4.99
2006-07-01	5.24
2006-08-01	5.25
2006-09-01	5.25
2006-10-01	5.25
2006-11-01	5.25
2006-12-01	5.24
2007-01-01	5.25
2007-02-01	5.26
2007-03-01	5.26
2007-04-01	5.25
2007-05-01	5.25
2007-06-01	5.25
2007-07-01	5.26
2007-08-01	5.02
2007-09-01	4.94
2007-10-01	4.76
2007-11-01	4.49
2007-12-01	4.24
2008-01-01	3.94
2008-02-01	2.98
2008-03-01	2.61
2008-04-01	2.28
2008-05-01	1.98
2008-06-01	2
2008-07-01	2.01
2008-08-01	2
2008-09-01	1.81
2008-10-01	0.97
2008-11-01	0.39
2008-12-01	0.16
2009-01-01	0.15
2009-02-01	0.22
2009-03-01	0.18
2009-04-01	0.15
2009-05-01	0.18
2009-06-01	0.21
2009-07-01	0.16
2009-08-01	0.16
2009-09-01	0.15
2009-10-01	0.12
2009-11-01	0.12
2009-12-01	0.12
2010-01-01	0.11
2010-02-01	0.13
2010-03-01	0.16
2010-04-01	0.2
2010-05-01	0.2
2010-06-01	0.18
2010-07-01	0.18
2010-08-01	0.19
2010-09-01	0.19
2010-10-01	0.19
2010-11-01	0.19
2010-12-01	0.18
2011-01-01	0.17
2011-02-01	0.16
2011-03-01	0.14
2011-04-01	0.1
2011-05-01	0.09
2011-06-01	0.09
2011-07-01	0.07
2011-08-01	0.1
2011-09-01	0.08
2011-10-01	0.07
2011-11-01	0.08
2011-12-01	0.07
2012-01-01	0.08
2012-02-01	0.1
2012-03-01	0.13
2012-04-01	0.14
2012-05-01	0.16
2012-06-01	0.16
2012-07-01	0.16
2012-08-01	0.13
2012-09-01	0.14
2012-10-01	0.16
2012-11-01	0.16
2012-12-01	0.16
2013-01-01	0.14
2013-02-01	0.15
2013-03-01	0.14
2013-04-01	0.15
2013-05-01	0.11
2013-06-01	0.09
2013-07-01	0.09
2013-08-01	0.08
2013-09-01	0.08
2013-10-01	0.09
2013-11-01	0.08
2013-12-01	0.09
2014-01-01	0.07
2014-02-01	0.07
2014-03-01	0.08
2014-04-01	0.09
2014-05-01	0.09
2014-06-01	0.1
2014-07-01	0.09
2014-08-01	0.09
2014-09-01	0.09
2014-10-01	0.09
2014-11-01	0.09
2014-12-01	0.12
2015-01-01	0.11
2015-02-01	0.11
2015-03-01	0.11
2015-04-01	0.12
2015-05-01	0.12
2015-06-01	0.13
2015-07-01	0.13
2015-08-01	0.14
2015-09-01	0.14
2015-10-01	0.12
2015-11-01	0.12
2015-12-01	0.24
2016-01-01	0.34
2016-02-01	0.38
2016-03-01	0.36
2016-04-01	0.37
2016-05-01	0.37
2016-06-01	0.38
2016-07-01	0.39
2016-08-01	0.4
2016-09-01	0.4
2016-10-01	0.4
2016-11-01	0.41
2016-12-01	0.54
2017-01-01	0.65
2017-02-01	0.66
2017-03-01	0.79
2017-04-01	0.9
2017-05-01	0.91
2017-06-01	1.04
2017-07-01	1.15
2017-08-01	1.16
2017-09-01	1.15
2017-10-01	1.15
2017-11-01	1.16
2017-12-01	1.3
2018-01-01	1.41
2018-02-01	1.42
2018-03-01	1.51
2018-04-01	1.69
2018-05-01	1.7
2018-06-01	1.82
2018-07-01	1.91
2018-08-01	1.91
2018-09-01	1.95
2018-10-01	2.19
2018-11-01	2.2
2018-12-01	2.27
