# Supplementary material for: Optimal Macroeconomic Policy in Nonlinear Models: A VSTAR Perspective
Source: publisher site journal article supplement (doi:10.1515/snde-2024-0100), 2025-10-08
Supplement: Supplementary file 9 [file GDP.xls]

## Sheet: FRED Graph
observation_date	GDP			Interpolated series from matlab	Markit series	Final series (combines interpolation+markit
1978-01-01	2202.76		1978-01-01	2202.76		2202.76
1978-04-01	2331.63		1978-02-01	2245.72		2245.72
1978-07-01	2395.05		1978-03-01	2288.68		2288.68
1978-10-01	2476.95		1978-04-01	2331.63		2331.63
1979-01-01	2526.61		1978-05-01	2352.77		2352.77
1979-04-01	2591.25		1978-06-01	2373.91		2373.91
1979-07-01	2667.57		1978-07-01	2395.05		2395.05
1979-10-01	2723.88		1978-08-01	2422.35		2422.35
1980-01-01	2789.84		1978-09-01	2449.65		2449.65
1980-04-01	2797.35		1978-10-01	2476.95		2476.95
1980-07-01	2856.48		1978-11-01	2493.5		2493.5
1980-10-01	2985.56		1978-12-01	2510.06		2510.06
1981-01-01	3124.21		1979-01-01	2526.61		2526.61
1981-04-01	3162.53		1979-02-01	2548.16		2548.16
1981-07-01	3260.61		1979-03-01	2569.7		2569.7
1981-10-01	3280.82		1979-04-01	2591.25		2591.25
1982-01-01	3274.3		1979-05-01	2616.69		2616.69
1982-04-01	3331.97		1979-06-01	2642.13		2642.13
1982-07-01	3366.32		1979-07-01	2667.57		2667.57
1982-10-01	3402.56		1979-08-01	2686.34		2686.34
1983-01-01	3473.41		1979-09-01	2705.11		2705.11
1983-04-01	3578.85		1979-10-01	2723.88		2723.88
1983-07-01	3689.18		1979-11-01	2745.87		2745.87
1983-10-01	3794.71		1979-12-01	2767.86		2767.86
1984-01-01	3908.05		1980-01-01	2789.84		2789.84
1984-04-01	4009.6		1980-02-01	2792.35		2792.35
1984-07-01	4084.25		1980-03-01	2794.85		2794.85
1984-10-01	4148.55		1980-04-01	2797.35		2797.35
1985-01-01	4230.17		1980-05-01	2817.06		2817.06
1985-04-01	4294.89		1980-06-01	2836.77		2836.77
1985-07-01	4386.77		1980-07-01	2856.48		2856.48
1985-10-01	4444.09		1980-08-01	2899.51		2899.51
1986-01-01	4507.89		1980-09-01	2942.53		2942.53
1986-04-01	4545.34		1980-10-01	2985.56		2985.56
1986-07-01	4607.67		1980-11-01	3031.77		3031.77
1986-10-01	4657.63		1980-12-01	3077.99		3077.99
1987-01-01	4722.16		1981-01-01	3124.21		3124.21
1987-04-01	4806.16		1981-02-01	3136.98		3136.98
1987-07-01	4884.56		1981-03-01	3149.76		3149.76
1987-10-01	5007.99		1981-04-01	3162.53		3162.53
1988-01-01	5073.37		1981-05-01	3195.22		3195.22
1988-04-01	5190.04		1981-06-01	3227.92		3227.92
1988-07-01	5282.84		1981-07-01	3260.61		3260.61
1988-10-01	5399.51		1981-08-01	3267.35		3267.35
1989-01-01	5511.25		1981-09-01	3274.08		3274.08
1989-04-01	5612.46		1981-10-01	3280.82		3280.82
1989-07-01	5695.36		1981-11-01	3278.65		3278.65
1989-10-01	5747.24		1981-12-01	3276.47		3276.47
1990-01-01	5872.7		1982-01-01	3274.3		3274.3
1990-04-01	5960.03		1982-02-01	3293.53		3293.53
1990-07-01	6015.12		1982-03-01	3312.75		3312.75
1990-10-01	6004.73		1982-04-01	3331.97		3331.97
1991-01-01	6035.18		1982-05-01	3343.42		3343.42
1991-04-01	6126.86		1982-06-01	3354.87		3354.87
1991-07-01	6205.94		1982-07-01	3366.32		3366.32
1991-10-01	6264.54		1982-08-01	3378.4		3378.4
1992-01-01	6363.1		1982-09-01	3390.48		3390.48
1992-04-01	6470.76		1982-10-01	3402.56		3402.56
1992-07-01	6566.64		1982-11-01	3426.18		3426.18
1992-10-01	6680.8		1982-12-01	3449.8		3449.8
1993-01-01	6729.46		1983-01-01	3473.41		3473.41
1993-04-01	6808.94		1983-02-01	3508.56		3508.56
1993-07-01	6882.1		1983-03-01	3543.7		3543.7
1993-10-01	7013.74		1983-04-01	3578.85		3578.85
1994-01-01	7115.65		1983-05-01	3615.62		3615.62
1994-04-01	7246.93		1983-06-01	3652.4		3652.4
1994-07-01	7331.07		1983-07-01	3689.18		3689.18
1994-10-01	7455.29		1983-08-01	3724.35		3724.35
1995-01-01	7522.29		1983-09-01	3759.53		3759.53
1995-04-01	7581		1983-10-01	3794.71		3794.71
1995-07-01	7683.12		1983-11-01	3832.49		3832.49
1995-10-01	7772.59		1983-12-01	3870.27		3870.27
1996-01-01	7868.47		1984-01-01	3908.05		3908.05
1996-04-01	8032.84		1984-02-01	3941.9		3941.9
1996-07-01	8131.41		1984-03-01	3975.75		3975.75
1996-10-01	8259.77		1984-04-01	4009.6		4009.6
1997-01-01	8362.66		1984-05-01	4034.48		4034.48
1997-04-01	8518.83		1984-06-01	4059.37		4059.37
1997-07-01	8662.82		1984-07-01	4084.25		4084.25
1997-10-01	8765.91		1984-08-01	4105.68		4105.68
1998-01-01	8866.48		1984-09-01	4127.12		4127.12
1998-04-01	8969.7		1984-10-01	4148.55		4148.55
1998-07-01	9121.1		1984-11-01	4175.76		4175.76
1998-10-01	9293.99		1984-12-01	4202.96		4202.96
1999-01-01	9417.26		1985-01-01	4230.17		4230.17
1999-04-01	9524.15		1985-02-01	4251.74		4251.74
1999-07-01	9681.86		1985-03-01	4273.31		4273.31
1999-10-01	9899.38		1985-04-01	4294.89		4294.89
2000-01-01	10002.9		1985-05-01	4325.52		4325.52
2000-04-01	10247.7		1985-06-01	4356.14		4356.14
2000-07-01	10319.8		1985-07-01	4386.77		4386.77
2000-10-01	10439		1985-08-01	4405.88		4405.88
2001-01-01	10472.9		1985-09-01	4424.99		4424.99
2001-04-01	10597.8		1985-10-01	4444.09		4444.09
2001-07-01	10596.3		1985-11-01	4465.36		4465.36
2001-10-01	10660.3		1985-12-01	4486.63		4486.63
2002-01-01	10789		1986-01-01	4507.89		4507.89
2002-04-01	10893.2		1986-02-01	4520.38		4520.38
2002-07-01	10992.1		1986-03-01	4532.86		4532.86
2002-10-01	11071.5		1986-04-01	4545.34		4545.34
2003-01-01	11183.5		1986-05-01	4566.12		4566.12
2003-04-01	11312.9		1986-06-01	4586.89		4586.89
2003-07-01	11567.3		1986-07-01	4607.67		4607.67
2003-10-01	11769.3		1986-08-01	4624.32		4624.32
2004-01-01	11920.2		1986-09-01	4640.97		4640.97
2004-04-01	12109		1986-10-01	4657.63		4657.63
2004-07-01	12303.3		1986-11-01	4679.14		4679.14
2004-10-01	12522.4		1986-12-01	4700.65		4700.65
2005-01-01	12761.3		1987-01-01	4722.16		4722.16
2005-04-01	12910		1987-02-01	4750.16		4750.16
2005-07-01	13142.9		1987-03-01	4778.16		4778.16
2005-10-01	13332.3		1987-04-01	4806.16		4806.16
2006-01-01	13603.9		1987-05-01	4832.29		4832.29
2006-04-01	13749.8		1987-06-01	4858.42		4858.42
2006-07-01	13867.5		1987-07-01	4884.56		4884.56
2006-10-01	14037.2		1987-08-01	4925.7		4925.7
2007-01-01	14208.6		1987-09-01	4966.85		4966.85
2007-04-01	14382.4		1987-10-01	5007.99		5007.99
2007-07-01	14535		1987-11-01	5029.79		5029.79
2007-10-01	14681.5		1987-12-01	5051.58		5051.58
2008-01-01	14651		1988-01-01	5073.37		5073.37
2008-04-01	14805.6		1988-02-01	5112.26		5112.26
2008-07-01	14835.2		1988-03-01	5151.15		5151.15
2008-10-01	14559.5		1988-04-01	5190.04		5190.04
2009-01-01	14394.5		1988-05-01	5220.97		5220.97
2009-04-01	14352.9		1988-06-01	5251.9		5251.9
2009-07-01	14420.3		1988-07-01	5282.84		5282.84
2009-10-01	14628		1988-08-01	5321.73		5321.73
2010-01-01	14721.4		1988-09-01	5360.62		5360.62
2010-04-01	14926.1		1988-10-01	5399.51		5399.51
2010-07-01	15079.9		1988-11-01	5436.76		5436.76
2010-10-01	15240.8		1988-12-01	5474.01		5474.01
2011-01-01	15285.8		1989-01-01	5511.25		5511.25
2011-04-01	15496.2		1989-02-01	5544.99		5544.99
2011-07-01	15591.9		1989-03-01	5578.73		5578.73
2011-10-01	15796.5		1989-04-01	5612.46		5612.46
2012-01-01	16019.8		1989-05-01	5640.1		5640.1
2012-04-01	16152.3		1989-06-01	5667.73		5667.73
2012-07-01	16257.2		1989-07-01	5695.36		5695.36
2012-10-01	16358.9		1989-08-01	5712.66		5712.66
2013-01-01	16569.6		1989-09-01	5729.95		5729.95
2013-04-01	16637.9		1989-10-01	5747.24		5747.24
2013-07-01	16848.7		1989-11-01	5789.06		5789.06
2013-10-01	17083.1		1989-12-01	5830.88		5830.88
2014-01-01	17102.9		1990-01-01	5872.7		5872.7
2014-04-01	17425.8		1990-02-01	5901.81		5901.81
2014-07-01	17719.8		1990-03-01	5930.92		5930.92
2014-10-01	17838.5		1990-04-01	5960.03		5960.03
2015-01-01	17970.4		1990-05-01	5978.39		5978.39
2015-04-01	18221.3		1990-06-01	5996.75		5996.75
2015-07-01	18331.1		1990-07-01	6015.12		6015.12
2015-10-01	18354.4		1990-08-01	6011.65		6011.65
2016-01-01	18409.1		1990-09-01	6008.19		6008.19
2016-04-01	18640.7		1990-10-01	6004.73		6004.73
2016-07-01	18799.6		1990-11-01	6014.88		6014.88
2016-10-01	18979.2		1990-12-01	6025.03		6025.03
2017-01-01	19162.5		1991-01-01	6035.18		6035.18
2017-04-01	19359.1		1991-02-01	6065.74		6065.74
2017-07-01	19588.1		1991-03-01	6096.3		6096.3
2017-10-01	19831.8		1991-04-01	6126.86		6126.86
2018-01-01	20041		1991-05-01	6153.22		6153.22
2018-04-01	20411.9		1991-06-01	6179.58		6179.58
2018-07-01	20658.2		1991-07-01	6205.94		6205.94
			1991-08-01	6225.47		6225.47
			1991-09-01	6245.01		6245.01
			1991-10-01	6264.54		6264.54
			1991-11-01	6297.39		6297.39
			1991-12-01	6330.25		6330.25
			1992-01-01	6363.1	6315.83	6315.83
			1992-02-01	6398.99	6356.43	6356.43
			1992-03-01	6434.88	6417.05	6417.05
			1992-04-01	6470.76	6443.28	6443.28
			1992-05-01	6502.72	6433.98	6433.98
			1992-06-01	6534.68	6535.03	6535.03
			1992-07-01	6566.64	6557.53	6557.53
			1992-08-01	6604.69	6556.62	6556.62
			1992-09-01	6642.75	6585.77	6585.77
			1992-10-01	6680.8	6637.31	6637.31
			1992-11-01	6697.02	6680.25	6680.25
			1992-12-01	6713.24	6724.85	6724.85
			1993-01-01	6729.46	6717.71	6717.71
			1993-02-01	6755.95	6741.54	6741.54
			1993-03-01	6782.45	6729.13	6729.13
			1993-04-01	6808.94	6768.32	6768.32
			1993-05-01	6833.33	6824.2	6824.2
			1993-06-01	6857.71	6834.3	6834.3
			1993-07-01	6882.1	6832.98	6832.98
			1993-08-01	6925.98	6873.97	6873.97
			1993-09-01	6969.86	6939.34	6939.34
			1993-10-01	7013.74	6944.72	6944.72
			1993-11-01	7047.71	7036.01	7036.01
			1993-12-01	7081.68	7060.49	7060.49
			1994-01-01	7115.65	7074.47	7074.47
			1994-02-01	7159.41	7122.96	7122.96
			1994-03-01	7203.17	7149.53	7149.53
			1994-04-01	7246.93	7186.28	7186.28
			1994-05-01	7274.98	7290.27	7290.27
			1994-06-01	7303.03	7264.24	7264.24
			1994-07-01	7331.07	7299.04	7299.04
			1994-08-01	7372.48	7351.72	7351.72
			1994-09-01	7413.88	7342.47	7342.47
			1994-10-01	7455.29	7429.13	7429.13
			1994-11-01	7477.62	7431.81	7431.81
			1994-12-01	7499.96	7504.92	7504.92
			1995-01-01	7522.29	7542.18	7542.18
			1995-02-01	7541.86	7488.28	7488.28
			1995-03-01	7561.43	7536.4	7536.4
			1995-04-01	7581	7538.96	7538.96
			1995-05-01	7615.04	7560.86	7560.86
			1995-06-01	7649.08	7643.17	7643.17
			1995-07-01	7683.12	7630.48	7630.48
			1995-08-01	7712.95	7674.12	7674.12
			1995-09-01	7742.77	7744.77	7744.77
			1995-10-01	7772.59	7747.38	7747.38
			1995-11-01	7804.55	7747.69	7747.69
			1995-12-01	7836.51	7822.68	7822.68
			1996-01-01	7868.47	7840.44	7840.44
			1996-02-01	7923.26	7852.86	7852.86
			1996-03-01	7978.05	7912.11	7912.11
			1996-04-01	8032.84	8025.06	8025.06
			1996-05-01	8065.7	8009.41	8009.41
			1996-06-01	8098.55	8064.05	8064.05
			1996-07-01	8131.41	8099.34	8099.34
			1996-08-01	8174.2	8122.94	8122.94
			1996-09-01	8216.98	8171.95	8171.95
			1996-10-01	8259.77	8251.07	8251.07
			1996-11-01	8294.07	8281.77	8281.77
			1996-12-01	8328.36	8246.48	8246.48
			1997-01-01	8362.66	8309.34	8309.34
			1997-02-01	8414.71	8385.54	8385.54
			1997-03-01	8466.77	8393.08	8393.08
			1997-04-01	8518.83	8512.11	8512.11
			1997-05-01	8566.82	8476.29	8476.29
			1997-06-01	8614.82	8568.07	8568.07
			1997-07-01	8662.82	8620.8	8620.8
			1997-08-01	8697.18	8655.76	8655.76
			1997-09-01	8731.55	8711.91	8711.91
			1997-10-01	8765.91	8747.99	8747.99
			1997-11-01	8799.43	8736.43	8736.43
			1997-12-01	8832.96	8813.29	8813.29
			1998-01-01	8866.48	8772.59	8772.59
			1998-02-01	8900.89	8894.38	8894.38
			1998-03-01	8935.29	8932.48	8932.48
			1998-04-01	8969.7	8925.74	8925.74
			1998-05-01	9020.17	8952.66	8952.66
			1998-06-01	9070.63	9030.69	9030.69
			1998-07-01	9121.1	9050.71	9050.71
			1998-08-01	9178.73	9100.03	9100.03
			1998-09-01	9236.36	9212.55	9212.55
			1998-10-01	9293.99	9265.45	9265.45
			1998-11-01	9335.08	9307.06	9307.06
			1998-12-01	9376.17	9309.47	9309.47
			1999-01-01	9417.26	9361.74	9361.74
			1999-02-01	9452.89	9417.41	9417.41
			1999-03-01	9488.52	9472.65	9472.65
			1999-04-01	9524.15	9495.08	9495.08
			1999-05-01	9576.72	9534.1	9534.1
			1999-06-01	9629.29	9543.28	9543.28
			1999-07-01	9681.86	9654.43	9654.43
			1999-08-01	9754.36	9655.39	9655.39
			1999-09-01	9826.87	9735.74	9735.74
			1999-10-01	9899.38	9817.27	9817.27
			1999-11-01	9933.87	9888.62	9888.62
			1999-12-01	9968.36	9992.25	9992.25
			2000-01-01	10002.9	9925.78	9925.78
			2000-02-01	10084.5	9995.7	9995.7
			2000-03-01	10166.1	10087.1	10087.1
			2000-04-01	10247.7	10224.2	10224.2
			2000-05-01	10271.7	10231.7	10231.7
			2000-06-01	10295.8	10287.1	10287.1
			2000-07-01	10319.8	10236.9	10236.9
			2000-08-01	10359.6	10341.9	10341.9
			2000-09-01	10399.3	10380.7	10380.7
			2000-10-01	10439	10440.8	10440.8
			2000-11-01	10450.3	10448.6	10448.6
			2000-12-01	10461.6	10427.6	10427.6
			2001-01-01	10472.9	10471.5	10471.5
			2001-02-01	10514.5	10465.9	10465.9
			2001-03-01	10556.2	10481.2	10481.2
			2001-04-01	10597.8	10562.9	10562.9
			2001-05-01	10597.3	10639.6	10639.6
			2001-06-01	10596.8	10591	10591
			2001-07-01	10596.3	10582.3	10582.3
			2001-08-01	10617.6	10693.3	10693.3
			2001-09-01	10639	10513.3	10513.3
			2001-10-01	10660.3	10641.4	10641.4
			2001-11-01	10703.2	10586.1	10586.1
			2001-12-01	10746.1	10753.3	10753.3
			2002-01-01	10789	10787	10787
			2002-02-01	10823.7	10754.8	10754.8
			2002-03-01	10858.5	10825.1	10825.1
			2002-04-01	10893.2	10867.2	10867.2
			2002-05-01	10926.2	10873.4	10873.4
			2002-06-01	10959.1	10939	10939
			2002-07-01	10992.1	11007.3	11007.3
			2002-08-01	11018.5	10961.9	10961.9
			2002-09-01	11045	11007	11007
			2002-10-01	11071.5	11004.3	11004.3
			2002-11-01	11108.8	11063.8	11063.8
			2002-12-01	11146.2	11146.3	11146.3
			2003-01-01	11183.5	11145.2	11145.2
			2003-02-01	11226.6	11221.7	11221.7
			2003-03-01	11269.8	11183.6	11183.6
			2003-04-01	11312.9	11260	11260
			2003-05-01	11397.7	11274.8	11274.8
			2003-06-01	11482.5	11403.9	11403.9
			2003-07-01	11567.3	11463.4	11463.4
			2003-08-01	11634.6	11570.6	11570.6
			2003-09-01	11702	11668	11668
			2003-10-01	11769.3	11696.4	11696.4
			2003-11-01	11819.6	11782.7	11782.7
			2003-12-01	11869.9	11828.7	11828.7
			2004-01-01	11920.2	11805.2	11805.2
			2004-02-01	11983.1	11923.5	11923.5
			2004-03-01	12046	12031.8	12031.8
			2004-04-01	12109	12032.4	12032.4
			2004-05-01	12173.8	12169.9	12169.9
			2004-06-01	12238.6	12124.7	12124.7
			2004-07-01	12303.3	12278.9	12278.9
			2004-08-01	12376.4	12299.4	12299.4
			2004-09-01	12449.4	12331.7	12331.7
			2004-10-01	12522.4	12466	12466
			2004-11-01	12602.1	12510.6	12510.6
			2004-12-01	12681.7	12590.7	12590.7
			2005-01-01	12761.3	12745.1	12745.1
			2005-02-01	12810.9	12745.5	12745.5
			2005-03-01	12860.5	12793.4	12793.4
			2005-04-01	12910	12845.1	12845.1
			2005-05-01	12987.6	12874	12874
			2005-06-01	13065.3	13011	13011
			2005-07-01	13142.9	13088.5	13088.5
			2005-08-01	13206	13151.5	13151.5
			2005-09-01	13269.2	13188.7	13188.7
			2005-10-01	13332.3	13246.6	13246.6
			2005-11-01	13422.9	13305.6	13305.6
			2005-12-01	13513.4	13444.8	13444.8
			2006-01-01	13603.9	13531.1	13531.1
			2006-02-01	13652.6	13571.4	13571.4
			2006-03-01	13701.2	13709.3	13709.3
			2006-04-01	13749.8	13689.4	13689.4
			2006-05-01	13789	13778.6	13778.6
			2006-06-01	13828.2	13781.4	13781.4
			2006-07-01	13867.5	13785.6	13785.6
			2006-08-01	13924.1	13879.6	13879.6
			2006-09-01	13980.6	13937.2	13937.2
			2006-10-01	14037.2	13969	13969
			2006-11-01	14094.3	14057.5	14057.5
			2006-12-01	14151.5	14085.2	14085.2
			2007-01-01	14208.6	14131.2	14131.2
			2007-02-01	14266.5	14279	14279
			2007-03-01	14324.4	14215.5	14215.5
			2007-04-01	14382.4	14342.6	14342.6
			2007-05-01	14433.2	14380.5	14380.5
			2007-06-01	14484.1	14424	14424
			2007-07-01	14535	14393.8	14393.8
			2007-08-01	14583.8	14571.2	14571.2
			2007-09-01	14632.7	14640	14640
			2007-10-01	14681.5	14630.7	14630.7
			2007-11-01	14671.3	14687.8	14687.8
			2007-12-01	14661.2	14726	14726
			2008-01-01	14651	14754.2	14754.2
			2008-02-01	14702.6	14569	14569
			2008-03-01	14754.1	14629.9	14629.9
			2008-04-01	14805.6	14698.8	14698.8
			2008-05-01	14815.5	14743.9	14743.9
			2008-06-01	14825.3	14974.2	14974.2
			2008-07-01	14835.2	14904.6	14904.6
			2008-08-01	14743.3	14858.4	14858.4
			2008-09-01	14651.4	14742.6	14742.6
			2008-10-01	14559.5	14637	14637
			2008-11-01	14504.5	14653.2	14653.2
			2008-12-01	14449.5	14388.5	14388.5
			2009-01-01	14394.5	14444.4	14444.4
			2009-02-01	14380.6	14402.4	14402.4
			2009-03-01	14366.7	14336.8	14336.8
			2009-04-01	14352.9	14328.4	14328.4
			2009-05-01	14375.3	14350.2	14350.2
			2009-06-01	14397.8	14379.9	14379.9
			2009-07-01	14420.3	14347.7	14347.7
			2009-08-01	14489.5	14454	14454
			2009-09-01	14558.8	14459.3	14459.3
			2009-10-01	14628	14670.9	14670.9
			2009-11-01	14659.1	14642.5	14642.5
			2009-12-01	14690.2	14570.7	14570.7
			2010-01-01	14721.4	14671.6	14671.6
			2010-02-01	14789.6	14691.7	14691.7
			2010-03-01	14857.8	14800.7	14800.7
			2010-04-01	14926.1	14898.5	14898.5
			2010-05-01	14977.4	14899.1	14899.1
			2010-06-01	15028.6	14980.7	14980.7
			2010-07-01	15079.9	15056.9	15056.9
			2010-08-01	15133.6	15049.9	15049.9
			2010-09-01	15187.2	15133	15133
			2010-10-01	15240.8	15221.5	15221.5
			2010-11-01	15255.8	15194.1	15194.1
			2010-12-01	15270.8	15307	15307
			2011-01-01	15285.8	15186.1	15186.1
			2011-02-01	15355.9	15220.2	15220.2
			2011-03-01	15426.1	15451.1	15451.1
			2011-04-01	15496.2	15525.3	15525.3
			2011-05-01	15528.1	15505.6	15505.6
			2011-06-01	15560	15457.7	15457.7
			2011-07-01	15591.9	15560.8	15560.8
			2011-08-01	15660.1	15658.7	15658.7
			2011-09-01	15728.3	15556	15556
			2011-10-01	15796.5	15812.2	15812.2
			2011-11-01	15870.9	15789.7	15789.7
			2011-12-01	15945.3	15787.5	15787.5
			2012-01-01	16019.8	15888.9	15888.9
			2012-02-01	16063.9	16159.2	16159.2
			2012-03-01	16108.1	16011.2	16011.2
			2012-04-01	16152.3	16129.1	16129.1
			2012-05-01	16187.2	16162.8	16162.8
			2012-06-01	16222.2	16164.8	16164.8
			2012-07-01	16257.2	16261.9	16261.9
			2012-08-01	16291.1	16207.5	16207.5
			2012-09-01	16325	16302.1	16302.1
			2012-10-01	16358.9	16271.4	16271.4
			2012-11-01	16429.1	16345.7	16345.7
			2012-12-01	16499.3	16459.4	16459.4
			2013-01-01	16569.6	16610.6	16610.6
			2013-02-01	16592.4	16520.5	16520.5
			2013-03-01	16615.1	16577.6	16577.6
			2013-04-01	16637.9	16592.6	16592.6
			2013-05-01	16708.2	16584.2	16584.2
			2013-06-01	16778.5	16737	16737
			2013-07-01	16848.7	16784.2	16784.2
			2013-08-01	16926.9	16873.3	16873.3
			2013-09-01	17005	16888.8	16888.8
			2013-10-01	17083.1	16997.7	16997.7
			2013-11-01	17089.7	17123.1	17123.1
			2013-12-01	17096.3	17128.7	17128.7
			2014-01-01	17102.9	17023.5	17023.5
			2014-02-01	17210.5	17111.5	17111.5
			2014-03-01	17318.2	17173.7	17173.7
			2014-04-01	17425.8	17313.9	17313.9
			2014-05-01	17523.8	17430.2	17430.2
			2014-06-01	17621.8	17533.2	17533.2
			2014-07-01	17719.8	17650.6	17650.6
			2014-08-01	17759.4	17777.7	17777.7
			2014-09-01	17798.9	17731.2	17731.2
			2014-10-01	17838.5	17830.3	17830.3
			2014-11-01	17882.4	17850.7	17850.7
			2014-12-01	17926.4	17834.3	17834.3
			2015-01-01	17970.4	17884.8	17884.8
			2015-02-01	18054	18032.5	18032.5
			2015-03-01	18137.7	17994	17994
			2015-04-01	18221.3	18166.2	18166.2
			2015-05-01	18257.9	18201.6	18201.6
			2015-06-01	18294.5	18296	18296
			2015-07-01	18331.1	18288.7	18288.7
			2015-08-01	18338.9	18315.3	18315.3
			2015-09-01	18346.6	18389.3	18389.3
			2015-10-01	18354.4	18387.8	18387.8
			2015-11-01	18372.6	18324.1	18324.1
			2015-12-01	18390.9	18351.2	18351.2
			2016-01-01	18409.1	18359.4	18359.4
			2016-02-01	18486.3	18323.2	18323.2
			2016-03-01	18563.5	18544.8	18544.8
			2016-04-01	18640.7	18632.9	18632.9
			2016-05-01	18693.7	18607.4	18607.4
			2016-06-01	18746.7	18681.9	18681.9
			2016-07-01	18799.6	18672.2	18672.2
			2016-08-01	18859.5	18820.7	18820.7
			2016-09-01	18919.4	18906	18906
			2016-10-01	18979.2	18852.2	18852.2
			2016-11-01	19040.3	19018.2	19018.2
			2016-12-01	19101.4	19067.4	19067.4
			2017-01-01	19162.5	19090.1	19090.1
			2017-02-01	19228.1	19132.3	19132.3
			2017-03-01	19293.6	19265.3	19265.3
			2017-04-01	19359.1	19213.8	19213.8
			2017-05-01	19435.4	19383.4	19383.4
			2017-06-01	19511.8	19480.2	19480.2
			2017-07-01	19588.1	19477.3	19477.3
			2017-08-01	19669.3	19594.2	19594.2
			2017-09-01	19750.6	19692.6	19692.6
			2017-10-01	19831.8	19712.5	19712.5
			2017-11-01	19901.6	19866.7	19866.7
			2017-12-01	19971.3	19916.3	19916.3
			2018-01-01	20041	19988.9	19988.9
			2018-02-01	20164.7	20051.7	20051.7
			2018-03-01	20288.3	20082.5	20082.5
			2018-04-01	20411.9	20279.4	20279.4
			2018-05-01	20494	20457.5	20457.5
			2018-06-01	20576.1	20499.1	20499.1
			2018-07-01	20658.2	20636.6	20636.6
			2018-08-01		20638.5	20638.5
			2018-09-01		20677.8	20677.8
			2018-10-01		20777.4	20777.4
			2018-11-01
			2018-12-01
