# Supplementary material for: Optimal Macroeconomic Policy in Nonlinear Models: A VSTAR Perspective
Source: publisher site journal article supplement (doi:10.1515/snde-2024-0100), 2025-10-08
Supplement: Supplementary file 10 [file GFDEBTN.xls]

## Sheet: FRED Graph
observation_date (end of quarter)	GFDEBTN		Months	Interpolated DEBT		Final series (combines interpolation+markit) NGDP		DEBT-GDP	Deficit
1978-07-01	771544		1978-07-01	771544	1978-07-01	2395.05		32.2141
1978-10-01	789207		1978-08-01	777432	1978-08-01	2422.35		32.0941
1979-01-01	796792		1978-09-01	783319	1978-09-01	2449.65		31.9768
1979-04-01	804913		1978-10-01	789207	1978-10-01	2476.95		31.8621
1979-07-01	826519		1978-11-01	791735	1978-11-01	2493.5		31.7519
1979-10-01	845116		1978-12-01	794264	1978-12-01	2510.06		31.6433
1980-01-01	863451		1979-01-01	796792	1979-01-01	2526.61		31.536
1980-04-01	877614		1979-02-01	799499	1979-02-01	2548.16		31.3756
1980-07-01	907701		1979-03-01	802206	1979-03-01	2569.7		31.2179
1980-10-01	930210		1979-04-01	804913	1979-04-01	2591.25		31.0628
1981-01-01	964531		1979-05-01	812115	1979-05-01	2616.69		31.036
1981-04-01	971174		1979-06-01	819317	1979-06-01	2642.13		31.0098
1981-07-01	997855		1979-07-01	826519	1979-07-01	2667.57		30.984	-1.23004
1981-10-01	1028729		1979-08-01	832718	1979-08-01	2686.34		30.9983	-1.09583
1982-01-01	1061299		1979-09-01	838917	1979-09-01	2705.11		31.0123	-0.964479
1982-04-01	1079630		1979-10-01	845116	1979-10-01	2723.88		31.0261	-0.835912
1982-07-01	1142035		1979-11-01	851228	1979-11-01	2745.87		31.0003	-0.751637
1982-10-01	1197074		1979-12-01	857339	1979-12-01	2767.86		30.9749	-0.668404
1983-01-01	1244493		1980-01-01	863451	1980-01-01	2789.84		30.9498	-0.586193
1983-04-01	1319581		1980-02-01	868172	1980-02-01	2792.35		31.0911	-0.284455
1983-07-01	1377211		1980-03-01	872893	1980-03-01	2794.85		31.2322	0.0143407
1983-10-01	1410702		1980-04-01	877614	1980-04-01	2797.35		31.373	0.310261
1984-01-01	1463741		1980-05-01	887643	1980-05-01	2817.06		31.5095	0.473518
1984-04-01	1512697		1980-06-01	897672	1980-06-01	2836.77		31.6441	0.634362
1984-07-01	1572267		1980-07-01	907701	1980-07-01	2856.48		31.7769	0.792849
1984-10-01	1662966		1980-08-01	915204	1980-08-01	2899.51		31.5641	0.565855
1985-01-01	1710731		1980-09-01	922707	1980-09-01	2942.53		31.3576	0.34528
1985-04-01	1774640		1980-10-01	930210	1980-10-01	2985.56		31.157	0.130851
1985-07-01	1823103		1980-11-01	941650	1980-11-01	3031.77		31.0594	0.0590933
1985-10-01	1945942		1980-12-01	953091	1980-12-01	3077.99		30.9647	-0.0101439
1986-01-01	1986816		1981-01-01	964531	1981-01-01	3124.21		30.8728	-0.0769811
1986-04-01	2059349		1981-02-01	966745	1981-02-01	3136.98		30.8177	-0.273445
1986-07-01	2125304		1981-03-01	968960	1981-03-01	3149.76		30.763	-0.469209
1986-10-01	2214835		1981-04-01	971174	1981-04-01	3162.53		30.7087	-0.664279
1987-01-01	2246724		1981-05-01	980068	1981-05-01	3195.22		30.6729	-0.836636
1987-04-01	2309296		1981-06-01	988961	1981-06-01	3227.92		30.6378	-1.00637
1987-07-01	2350277		1981-07-01	997855	1981-07-01	3260.61		30.6033	-1.17354
1987-10-01	2431715		1981-08-01	1.00815e+06	1981-08-01	3267.35		30.8552	-0.708905
1988-01-01	2487551		1981-09-01	1.01844e+06	1981-09-01	3274.08		31.1061	-0.251527
1988-04-01	2547656		1981-10-01	1028729	1981-10-01	3280.82		31.3559	0.198869
1988-07-01	2602183		1981-11-01	1.03959e+06	1981-11-01	3278.65		31.7078	0.648383
1988-10-01	2684392		1981-12-01	1.05044e+06	1981-12-01	3276.47		32.0601	1.09543
1989-01-01	2740898		1982-01-01	1061299	1982-01-01	3274.3		32.413	1.54015
1989-04-01	2799923		1982-02-01	1.06741e+06	1982-02-01	3293.53		32.4093	1.59163
1989-07-01	2857431		1982-03-01	1.07352e+06	1982-03-01	3312.75		32.4057	1.64271
1989-10-01	2952994		1982-04-01	1079630	1982-04-01	3331.97		32.4021	1.69338
1990-01-01	3051958		1982-05-01	1.10043e+06	1982-05-01	3343.42		32.9133	2.24044
1990-04-01	3143754		1982-06-01	1.12123e+06	1982-06-01	3354.87		33.421	2.78329
1990-07-01	3233313		1982-07-01	1142035	1982-07-01	3366.32		33.9253	3.32197
1990-10-01	3364820		1982-08-01	1.16038e+06	1982-08-01	3378.4		34.3471	3.49184
1991-01-01	3465189		1982-09-01	1.17873e+06	1982-09-01	3390.48		34.7658	3.65974
1991-04-01	3537988		1982-10-01	1197074	1982-10-01	3402.56		35.1816	3.82569
1991-07-01	3665303		1982-11-01	1.21288e+06	1982-11-01	3426.18		35.4004	3.69261
1991-10-01	3801698		1982-12-01	1.22869e+06	1982-12-01	3449.8		35.6162	3.55607
1992-01-01	3881288		1983-01-01	1244493	1983-01-01	3473.41		35.8291	3.41613
1992-04-01	3984656		1983-02-01	1.26952e+06	1983-02-01	3508.56		36.1836	3.77427
1992-07-01	4064621		1983-03-01	1.29455e+06	1983-03-01	3543.7		36.531	4.12533
1992-10-01	4177009		1983-04-01	1319581	1983-04-01	3578.85		36.8717	4.46954
1993-01-01	4230580		1983-05-01	1338791	1983-05-01	3615.62		37.0279	4.11459
1993-04-01	4351950		1983-06-01	1358001	1983-06-01	3652.4		37.181	3.75999
1993-07-01	4411489		1983-07-01	1377211	1983-07-01	3689.18		37.3311	3.40579
1993-10-01	4535687		1983-08-01	1.38837e+06	1983-08-01	3724.35		37.2783	2.93121
1994-01-01	4575869		1983-09-01	1.39954e+06	1983-09-01	3759.53		37.2264	2.46062
1994-04-01	4645802		1983-10-01	1410702	1983-10-01	3794.71		37.1755	1.99397
1994-07-01	4692750		1983-11-01	1.42838e+06	1983-11-01	3832.49		37.2703	1.86996
1994-10-01	4800150		1983-12-01	1.44606e+06	1983-12-01	3870.27		37.3633	1.74709
1995-01-01	4864116		1984-01-01	1463741	1984-01-01	3908.05		37.4545	1.62536
1995-04-01	4951372		1984-02-01	1.48006e+06	1984-02-01	3941.9		37.5468	1.36324
1995-07-01	4973983		1984-03-01	1.49638e+06	1984-03-01	3975.75		37.6376	1.10657
1995-10-01	4988665		1984-04-01	1512697	1984-04-01	4009.6		37.7269	0.855202
1996-01-01	5117786		1984-05-01	1.53255e+06	1984-05-01	4034.48		37.9864	0.958434
1996-04-01	5161076		1984-06-01	1.55241e+06	1984-06-01	4059.37		38.2427	1.06163
1996-07-01	5224811		1984-07-01	1572267	1984-07-01	4084.25		38.4959	1.16476
1996-10-01	5323172		1984-08-01	1602500	1984-08-01	4105.68		39.0313	1.753
1997-01-01	5380890		1984-09-01	1632733	1984-09-01	4127.12		39.5611	2.33469
1997-04-01	5376151		1984-10-01	1662966	1984-10-01	4148.55		40.0855	2.90994
1997-07-01	5413146		1984-11-01	1.67889e+06	1984-11-01	4175.76		40.2056	2.93525
1997-10-01	5502388		1984-12-01	1.69481e+06	1984-12-01	4202.96		40.3242	2.96086
1998-01-01	5542426		1985-01-01	1710731	1985-01-01	4230.17		40.4412	2.98673
1998-04-01	5547935		1985-02-01	1732034	1985-02-01	4251.74		40.7371	3.19022
1998-07-01	5526193		1985-03-01	1753337	1985-03-01	4273.31		41.0299	3.3923
1998-10-01	5614217		1985-04-01	1774640	1985-04-01	4294.89		41.3198	3.59296
1999-01-01	5651615		1985-05-01	1.79079e+06	1985-05-01	4325.52		41.4007	3.41435
1999-04-01	5638780		1985-06-01	1.80695e+06	1985-06-01	4356.14		41.4805	3.23779
1999-07-01	5656271		1985-07-01	1823103	1985-07-01	4386.77		41.5591	3.06324
1999-10-01	5776091		1985-08-01	1.86405e+06	1985-08-01	4405.88		42.3082	3.27696
2000-01-01	5773392		1985-09-01	1.905e+06	1985-09-01	4424.99		43.0509	3.48978
2000-04-01	5685938		1985-10-01	1945942	1985-10-01	4444.09		43.7871	3.70168
2000-07-01	5674179		1985-11-01	1.95957e+06	1985-11-01	4465.36		43.8837	3.67814
2000-10-01	5662216		1985-12-01	1.97319e+06	1985-12-01	4486.63		43.9794	3.65523
2001-01-01	5773740		1986-01-01	1986816	1986-01-01	4507.89		44.0742	3.63294
2001-04-01	5726815		1986-02-01	2.01099e+06	1986-02-01	4520.38		44.4873	3.75026
2001-07-01	5807464		1986-03-01	2.03517e+06	1986-03-01	4532.86		44.8982	3.86828
2001-10-01	5943439		1986-04-01	2059349	1986-04-01	4545.34		45.3068	3.98699
2002-01-01	6006032		1986-05-01	2081334	1986-05-01	4566.12		45.5822	4.18144
2002-04-01	6126469		1986-06-01	2103319	1986-06-01	4586.89		45.855	4.37453
2002-07-01	6228236		1986-07-01	2125304	1986-07-01	4607.67		46.1254	4.56627
2002-10-01	6405707		1986-08-01	2.15515e+06	1986-08-01	4624.32		46.6046	4.2964
2003-01-01	6460776		1986-09-01	2.18499e+06	1986-09-01	4640.97		47.0804	4.02957
2003-04-01	6670121		1986-10-01	2214835	1986-10-01	4657.63		47.5529	3.76572
2003-07-01	6783320		1986-11-01	2.22546e+06	1986-11-01	4679.14		47.5614	3.67771
2003-10-01	6997964		1986-12-01	2.23609e+06	1986-12-01	4700.65		47.5699	3.59054
2004-01-01	7131068		1987-01-01	2246724	1987-01-01	4722.16		47.5784	3.5042
2004-04-01	7274335		1987-02-01	2.26758e+06	1987-02-01	4750.16		47.737	3.24966
2004-07-01	7379053		1987-03-01	2.28844e+06	1987-03-01	4778.16		47.8937	2.99554
2004-10-01	7596143		1987-04-01	2309296	1987-04-01	4806.16		48.0487	2.74185
2005-01-01	7776939		1987-05-01	2.32296e+06	1987-05-01	4832.29		48.0715	2.48938
2005-04-01	7836496		1987-06-01	2.33662e+06	1987-06-01	4858.42		48.0941	2.23915
2005-07-01	7932710		1987-07-01	2350277	1987-07-01	4884.56		48.1165	1.99114
2005-10-01	8170413		1987-08-01	2377423	1987-08-01	4925.7		48.2657	1.66105
2006-01-01	8371156		1987-09-01	2404569	1987-09-01	4966.85		48.4124	1.33193
2006-04-01	8420042		1987-10-01	2431715	1987-10-01	5007.99		48.5567	1.0038
2006-07-01	8506974		1987-11-01	2450327	1987-11-01	5029.79		48.7163	1.15488
2006-10-01	8680224		1987-12-01	2468939	1987-12-01	5051.58		48.8746	1.30466
2007-01-01	8849665		1988-01-01	2487551	1988-01-01	5073.37		49.0315	1.45316
2007-04-01	8867677		1988-02-01	2507586	1988-02-01	5112.26		49.0504	1.31347
2007-07-01	9007653		1988-03-01	2527621	1988-03-01	5151.15		49.0691	1.17535
2007-10-01	9229172		1988-04-01	2547656	1988-04-01	5190.04		49.0874	1.03877
2008-01-01	9437594		1988-05-01	2.56583e+06	1988-05-01	5220.97		49.1447	1.07321
2008-04-01	9492006		1988-06-01	2.58401e+06	1988-06-01	5251.9		49.2014	1.10723
2008-07-01	10024725		1988-07-01	2602183	1988-07-01	5282.84		49.2573	1.14082
2008-10-01	10699805		1988-08-01	2629586	1988-08-01	5321.73		49.4123	1.1466
2009-01-01	11126941		1988-09-01	2656989	1988-09-01	5360.62		49.565	1.1526
2009-04-01	11545275		1988-10-01	2684392	1988-10-01	5399.51		49.7155	1.15882
2009-07-01	11909828		1988-11-01	2.70323e+06	1988-11-01	5436.76		49.7213	1.005
2009-10-01	12311349		1988-12-01	2.72206e+06	1988-12-01	5474.01		49.7271	0.852481
2010-01-01	12773123		1989-01-01	2740898	1989-01-01	5511.25		49.7328	0.701244
2010-04-01	13201792		1989-02-01	2760573	1989-02-01	5544.99		49.785	0.734559
2010-07-01	13561622		1989-03-01	2780248	1989-03-01	5578.73		49.8366	0.767527
2010-10-01	14025215		1989-04-01	2799923	1989-04-01	5612.46		49.8876	0.800155
2011-01-01	14270114		1989-05-01	2.81909e+06	1989-05-01	5640.1		49.983	0.838306
2011-04-01	14343087		1989-06-01	2.83826e+06	1989-06-01	5667.73		50.0776	0.876202
2011-07-01	14790340		1989-07-01	2857431	1989-07-01	5695.36		50.1712	0.913844
2011-10-01	15222940		1989-08-01	2.88929e+06	1989-08-01	5712.66		50.5769	1.16465
2012-01-01	15606518		1989-09-01	2.92114e+06	1989-09-01	5729.95		50.9802	1.41525
2012-04-01	15855037		1989-10-01	2952994	1989-10-01	5747.24		51.3811	1.66562
2012-07-01	16066240		1989-11-01	2985982	1989-11-01	5789.06		51.5798	1.85843
2012-10-01	16432730		1989-12-01	3018970	1989-12-01	5830.88		51.7755	2.04847
2013-01-01	16771381		1990-01-01	3051958	1990-01-01	5872.7		51.9686	2.2358
2013-04-01	16738320		1990-02-01	3.08256e+06	1990-02-01	5901.81		52.2307	2.4457
2013-07-01	16738180		1990-03-01	3.11316e+06	1990-03-01	5930.92		52.4903	2.65366
2013-10-01	17156119		1990-04-01	3143754	1990-04-01	5960.03		52.7473	2.8597
2014-01-01	17601227		1990-05-01	3173607	1990-05-01	5978.39		53.0846	3.10159
2014-04-01	17632606		1990-06-01	3203460	1990-06-01	5996.75		53.4199	3.34234
2014-07-01	17824071		1990-07-01	3233313	1990-07-01	6015.12		53.7531	3.58196
2014-10-01	18141444		1990-08-01	3.27715e+06	1990-08-01	6011.65		54.5133	3.93633
2015-01-01	18152056		1990-09-01	3.32098e+06	1990-09-01	6008.19		55.2743	4.29403
2015-04-01	18151998		1990-10-01	3364820	1990-10-01	6004.73		56.0361	4.65502
2015-07-01	18150618		1990-11-01	3.39828e+06	1990-11-01	6014.88		56.4978	4.91806
2015-10-01	18922179		1990-12-01	3.43173e+06	1990-12-01	6025.03		56.9579	5.18239
2016-01-01	19264939		1991-01-01	3465189	1991-01-01	6035.18		57.4165	5.44796
2016-04-01	19381591		1991-02-01	3.48946e+06	1991-02-01	6065.74		57.5273	5.29659
2016-07-01	19573445		1991-03-01	3.51372e+06	1991-03-01	6096.3		57.6369	5.14668
2016-10-01	19976827		1991-04-01	3537988	1991-04-01	6126.86		57.7455	4.99821
2017-01-01	19846420		1991-05-01	3.58043e+06	1991-05-01	6153.22		58.1878	5.10321
2017-04-01	19844554		1991-06-01	3.62286e+06	1991-06-01	6179.58		58.6264	5.2065
2017-07-01	20244900		1991-07-01	3665303	1991-07-01	6205.94		59.0612	5.30811
2017-10-01	20492747		1991-08-01	3710768	1991-08-01	6225.47		59.6062	5.09297
2018-01-01	21089643		1991-09-01	3756233	1991-09-01	6245.01		60.1478	4.87354
2018-04-01	21195070		1991-10-01	3801698	1991-10-01	6264.54		60.686	4.64986
2018-07-01	21516058		1991-11-01	3828228	1991-11-01	6297.39		60.7907	4.29286
2018-10-01	21974096		1991-12-01	3854758	1991-12-01	6330.25		60.8943	3.93633
2019-01-01	22027880		1992-01-01	3881288	1992-01-01	6315.83		61.4534	4.03685
			1992-02-01	3915744	1992-02-01	6356.43		61.6029	4.07563
			1992-03-01	3950200	1992-03-01	6417.05		61.5578	3.92089
			1992-04-01	3984656	1992-04-01	6443.28		61.842	4.09653
			1992-05-01	4011311	1992-05-01	6433.98		62.3457	4.15788
			1992-06-01	4037966	1992-06-01	6535.03		61.7895	3.16315
			1992-07-01	4064621	1992-07-01	6557.53		61.984	2.92277
			1992-08-01	4.10208e+06	1992-08-01	6556.62		62.564	2.95774
			1992-09-01	4.13955e+06	1992-09-01	6585.77		62.856	2.70816
			1992-10-01	4177009	1992-10-01	6637.31		62.9323	2.24631
			1992-11-01	4194866	1992-11-01	6680.25		62.795	2.00434
			1992-12-01	4212723	1992-12-01	6724.85		62.6441	1.74986
			1993-01-01	4230580	1993-01-01	6717.71		62.9765	1.52314
			1993-02-01	4.27104e+06	1993-02-01	6741.54		63.3541	1.75114
			1993-03-01	4.31149e+06	1993-03-01	6729.13		64.0721	2.51424
			1993-04-01	4351950	1993-04-01	6768.32		64.2989	2.45682
			1993-05-01	4.3718e+06	1993-05-01	6824.2		64.0631	1.71737
			1993-06-01	4.39164e+06	1993-06-01	6834.3		64.2589	2.46932
			1993-07-01	4411489	1993-07-01	6832.98		64.5617	2.57772
			1993-08-01	4.45289e+06	1993-08-01	6873.97		64.779	2.21501
			1993-09-01	4.49429e+06	1993-09-01	6939.34		64.7653	1.90937
			1993-10-01	4535687	1993-10-01	6944.72		65.3113	2.37903
			1993-11-01	4549081	1993-11-01	7036.01		64.6543	1.8593
			1993-12-01	4562475	1993-12-01	7060.49		64.6198	1.97567
			1994-01-01	4575869	1994-01-01	7074.47		64.6815	1.70497
			1994-02-01	4599180	1994-02-01	7122.96		64.5684	1.21435
			1994-03-01	4622491	1994-03-01	7149.53		64.6544	0.582364
			1994-04-01	4645802	1994-04-01	7186.28		64.6482	0.349336
			1994-05-01	4.66145e+06	1994-05-01	7290.27		63.9407	-0.122361
			1994-06-01	4.6771e+06	1994-06-01	7264.24		64.3852	0.126377
			1994-07-01	4692750	1994-07-01	7299.04		64.2927	-0.269029
			1994-08-01	4728550	1994-08-01	7351.72		64.319	-0.459983
			1994-09-01	4764350	1994-09-01	7342.47		64.8876	0.122271
			1994-10-01	4800150	1994-10-01	7429.13		64.6125	-0.698825
			1994-11-01	4821472	1994-11-01	7431.81		64.8761	0.221825
			1994-12-01	4842794	1994-12-01	7504.92		64.5283	-0.0915219
			1995-01-01	4864116	1995-01-01	7542.18		64.4922	-0.189316
			1995-02-01	4.8932e+06	1995-02-01	7488.28		65.3448	0.776366
			1995-03-01	4.92229e+06	1995-03-01	7536.4		65.3135	0.659031
			1995-04-01	4951372	1995-04-01	7538.96		65.6771	1.02893
			1995-05-01	4958909	1995-05-01	7560.86		65.5865	1.64581
			1995-06-01	4966446	1995-06-01	7643.17		64.9789	0.593635
			1995-07-01	4973983	1995-07-01	7630.48		65.1857	0.893027
			1995-08-01	4978877	1995-08-01	7674.12		64.8788	0.559798
			1995-09-01	4983771	1995-09-01	7744.77		64.3501	-0.537475
			1995-10-01	4988665	1995-10-01	7747.38		64.3916	-0.220911
			1995-11-01	5.03171e+06	1995-11-01	7747.69		64.9446	0.0684314
			1995-12-01	5.07475e+06	1995-12-01	7822.68		64.8722	0.34394
			1996-01-01	5117786	1996-01-01	7840.44		65.2742	0.782082
			1996-02-01	5132216	1996-02-01	7852.86		65.3547	0.00995614
			1996-03-01	5146646	1996-03-01	7912.11		65.0477	-0.265739
			1996-04-01	5161076	1996-04-01	8025.06		64.312	-1.36512
			1996-05-01	5182321	1996-05-01	8009.41		64.7029	-0.883681
			1996-06-01	5203566	1996-06-01	8064.05		64.528	-0.45092
			1996-07-01	5224811	1996-07-01	8099.34		64.5091	-0.67661
			1996-08-01	5257598	1996-08-01	8122.94		64.7253	-0.153445
			1996-09-01	5290385	1996-09-01	8171.95		64.7383	0.388227
			1996-10-01	5323172	1996-10-01	8251.07		64.515	0.123366
			1996-11-01	5.34241e+06	1996-11-01	8281.77		64.5081	-0.436495
			1996-12-01	5.36165e+06	1996-12-01	8246.48		65.0175	0.145272
			1997-01-01	5380890	1997-01-01	8309.34		64.7571	-0.517126
			1997-02-01	5.37931e+06	1997-02-01	8385.54		64.1498	-1.20493
			1997-03-01	5.37773e+06	1997-03-01	8393.08		64.0734	-0.974344
			1997-04-01	5376151	1997-04-01	8512.11		63.1589	-1.15317
			1997-05-01	5.38848e+06	1997-05-01	8476.29		63.5712	-1.13166
			1997-06-01	5.40081e+06	1997-06-01	8568.07		63.0342	-1.49376
			1997-07-01	5413146	1997-07-01	8620.8		62.7917	-1.71739
			1997-08-01	5.44289e+06	1997-08-01	8655.76		62.8817	-1.8436
			1997-09-01	5.47264e+06	1997-09-01	8711.91		62.8179	-1.92044
			1997-10-01	5502388	1997-10-01	8747.99		62.8989	-1.6161
			1997-11-01	5515734	1997-11-01	8736.43		63.1348	-1.37323
			1997-12-01	5529080	1997-12-01	8813.29		62.7357	-2.2818
			1998-01-01	5542426	1998-01-01	8772.59		63.1789	-1.57818
			1998-02-01	5.54426e+06	1998-02-01	8894.38		62.3345	-1.81534
			1998-03-01	5.5461e+06	1998-03-01	8932.48		62.0891	-1.98425
			1998-04-01	5547935	1998-04-01	8925.74		62.1566	-1.00229
			1998-05-01	5.54069e+06	1998-05-01	8952.66		61.8887	-1.6825
			1998-06-01	5.53344e+06	1998-06-01	9030.69		61.2737	-1.76048
			1998-07-01	5526193	1998-07-01	9050.71		61.0581	-1.73363
			1998-08-01	5.55553e+06	1998-08-01	9100.03		61.0497	-1.83209
			1998-09-01	5.58488e+06	1998-09-01	9212.55		60.6225	-2.19544
			1998-10-01	5614217	1998-10-01	9265.45		60.593	-2.30583
			1998-11-01	5626683	1998-11-01	9307.06		60.4561	-2.67875
			1998-12-01	5639149	1998-12-01	9309.47		60.5744	-2.16133
			1999-01-01	5651615	1999-01-01	9361.74		60.3693	-2.80962
			1999-02-01	5.64734e+06	1999-02-01	9417.41		59.967	-2.36748
			1999-03-01	5.64306e+06	1999-03-01	9472.65		59.5721	-2.517
			1999-04-01	5638780	1999-04-01	9495.08		59.3863	-2.77022
			1999-05-01	5.64461e+06	1999-05-01	9534.1		59.2044	-2.68427
			1999-06-01	5.65044e+06	1999-06-01	9543.28		59.2086	-2.06513
			1999-07-01	5656271	1999-07-01	9654.43		58.5873	-2.47079
			1999-08-01	5696211	1999-08-01	9655.39		58.9951	-2.05452
			1999-09-01	5736151	1999-09-01	9735.74		58.9185	-1.70401
			1999-10-01	5776091	1999-10-01	9817.27		58.836	-1.757
			1999-11-01	5.77519e+06	1999-11-01	9888.62		58.4024	-2.05369
			1999-12-01	5.77429e+06	1999-12-01	9992.25		57.7877	-2.78663
			2000-01-01	5773392	2000-01-01	9925.78		58.1656	-2.20367
			2000-02-01	5.74424e+06	2000-02-01	9995.7		57.4671	-2.49985
			2000-03-01	5.71509e+06	2000-03-01	10087.1		56.6574	-2.91472
			2000-04-01	5685938	2000-04-01	10224.2		55.6127	-3.77364
			2000-05-01	5.68202e+06	2000-05-01	10231.7		55.5334	-3.67108
			2000-06-01	5.6781e+06	2000-06-01	10287.1		55.1961	-4.01254
			2000-07-01	5674179	2000-07-01	10236.9		55.4288	-3.15847
			2000-08-01	5.67019e+06	2000-08-01	10341.9		54.8272	-4.1679
			2000-09-01	5.6662e+06	2000-09-01	10380.7		54.5842	-4.33431
			2000-10-01	5662216	2000-10-01	10440.8		54.2314	-4.60462
			2000-11-01	5.69939e+06	2000-11-01	10448.6		54.5468	-3.85565
			2000-12-01	5.73657e+06	2000-12-01	10427.6		55.0133	-2.77443
			2001-01-01	5773740	2001-01-01	10471.5		55.1377	-3.02795
			2001-02-01	5.7581e+06	2001-02-01	10465.9		55.0177	-2.44949
			2001-03-01	5.74246e+06	2001-03-01	10481.2		54.788	-1.86943
			2001-04-01	5726815	2001-04-01	10562.9		54.2164	-1.39633
			2001-05-01	5753698	2001-05-01	10639.6		54.0784	-1.45499
			2001-06-01	5780581	2001-06-01	10591		54.58	-0.616052
			2001-07-01	5807464	2001-07-01	10582.3		54.8789	-0.549923
			2001-08-01	5852789	2001-08-01	10693.3		54.7333	-0.0939161
			2001-09-01	5898114	2001-09-01	10513.3		56.1016	1.51745
			2001-10-01	5943439	2001-10-01	10641.4		55.8518	1.6204
			2001-11-01	5.9643e+06	2001-11-01	10586.1		56.3407	1.794
			2001-12-01	5.98517e+06	2001-12-01	10753.3		55.6588	0.64554
			2002-01-01	6006032	2002-01-01	10787		55.6786	0.540913
			2002-02-01	6.04618e+06	2002-02-01	10754.8		56.2187	1.201
			2002-03-01	6.08632e+06	2002-03-01	10825.1		56.224	1.436
			2002-04-01	6126469	2002-04-01	10867.2		56.3755	2.15915
			2002-05-01	6.16039e+06	2002-05-01	10873.4		56.6558	2.57738
			2002-06-01	6.19431e+06	2002-06-01	10939		56.626	2.04596
			2002-07-01	6228236	2002-07-01	11007.3		56.5829	1.70398
			2002-08-01	6287393	2002-08-01	10961.9		57.3569	2.62356
			2002-09-01	6346550	2002-09-01	11007		57.6593	1.55767
			2002-10-01	6405707	2002-10-01	11004.3		58.2107	2.35891
			2002-11-01	6.42406e+06	2002-11-01	11063.8		58.0641	1.7233
			2002-12-01	6.44242e+06	2002-12-01	11146.3		57.7988	2.13993
			2003-01-01	6460776	2003-01-01	11145.2		57.9689	2.29027
			2003-02-01	6.53056e+06	2003-02-01	11221.7		58.1957	1.97708
			2003-03-01	6.60034e+06	2003-03-01	11183.6		59.0182	2.79425
			2003-04-01	6670121	2003-04-01	11260		59.2374	2.86189
			2003-05-01	6707854	2003-05-01	11274.8		59.4943	2.83859
			2003-06-01	6745587	2003-06-01	11403.9		59.1517	2.52577
			2003-07-01	6783320	2003-07-01	11463.4		59.174	2.5911
			2003-08-01	6854868	2003-08-01	11570.6		59.2437	1.88678
			2003-09-01	6926416	2003-09-01	11668		59.3625	1.70327
			2003-10-01	6997964	2003-10-01	11696.4		59.83	1.6193
			2003-11-01	7042332	2003-11-01	11782.7		59.7685	1.70447
			2003-12-01	7086700	2003-12-01	11828.7		59.9109	2.1121
			2004-01-01	7131068	2004-01-01	11805.2		60.4062	2.43729
			2004-02-01	7.17882e+06	2004-02-01	11923.5		60.2073	2.01161
			2004-03-01	7.22658e+06	2004-03-01	12031.8		60.0623	1.04406
			2004-04-01	7274335	2004-04-01	12032.4		60.4562	1.21881
			2004-05-01	7309241	2004-05-01	12169.9		60.06	0.565655
			2004-06-01	7344147	2004-06-01	12124.7		60.572	1.42023
			2004-07-01	7379053	2004-07-01	12278.9		60.0953	0.921359
			2004-08-01	7.45142e+06	2004-08-01	12299.4		60.5834	1.33971
			2004-09-01	7.52378e+06	2004-09-01	12331.7		61.0119	1.64933
			2004-10-01	7596143	2004-10-01	12466		60.9349	1.10489
			2004-11-01	7.65641e+06	2004-11-01	12510.6		61.1995	1.43094
			2004-12-01	7.71667e+06	2004-12-01	12590.7		61.2887	1.37782
			2005-01-01	7776939	2005-01-01	12745.1		61.0189	0.612744
			2005-02-01	7.79679e+06	2005-02-01	12745.5		61.173	0.965694
			2005-03-01	7.81664e+06	2005-03-01	12793.4		61.099	1.03668
			2005-04-01	7836496	2005-04-01	12845.1		61.0076	0.551342
			2005-05-01	7.86857e+06	2005-05-01	12874		61.1201	1.06005
			2005-06-01	7.90064e+06	2005-06-01	13011		60.7228	0.150837
			2005-07-01	7932710	2005-07-01	13088.5		60.6083	0.513011
			2005-08-01	8.01194e+06	2005-08-01	13151.5		60.9206	0.337193
			2005-09-01	8.09118e+06	2005-09-01	13188.7		61.3494	0.337558
			2005-10-01	8170413	2005-10-01	13246.6		61.6795	0.744608
			2005-11-01	8.23733e+06	2005-11-01	13305.6		61.9086	0.70917
			2005-12-01	8.30424e+06	2005-12-01	13444.8		61.7656	0.476906
			2006-01-01	8371156	2006-01-01	13531.1		61.866	0.847125
			2006-02-01	8.38745e+06	2006-02-01	13571.4		61.8026	0.62953
			2006-03-01	8.40375e+06	2006-03-01	13709.3		61.2995	0.200476
			2006-04-01	8420042	2006-04-01	13689.4		61.5078	0.500206
			2006-05-01	8.44902e+06	2006-05-01	13778.6		61.3198	0.19972
			2006-06-01	8.478e+06	2006-06-01	13781.4		61.5177	0.794861
			2006-07-01	8506974	2006-07-01	13785.6		61.709	1.10066
			2006-08-01	8564724	2006-08-01	13879.6		61.7073	0.786726
			2006-09-01	8622474	2006-09-01	13937.2		61.8667	0.517279
			2006-10-01	8680224	2006-10-01	13969		62.1392	0.45973
			2006-11-01	8.7367e+06	2006-11-01	14057.5		62.1497	0.241099
			2006-12-01	8.79318e+06	2006-12-01	14085.2		62.4286	0.663008
			2007-01-01	8849665	2007-01-01	14131.2		62.625	0.758996
			2007-02-01	8855669	2007-02-01	14279		62.0186	0.216068
			2007-03-01	8861673	2007-03-01	14215.5		62.3382	1.03879
			2007-04-01	8867677	2007-04-01	14342.6		61.8276	0.319843
			2007-05-01	8.91434e+06	2007-05-01	14380.5		61.9889	0.669113
			2007-06-01	8.96099e+06	2007-06-01	14424		62.1257	0.608058
			2007-07-01	9007653	2007-07-01	14393.8		62.5801	0.871109
			2007-08-01	9.08149e+06	2007-08-01	14571.2		62.3248	0.617526
			2007-09-01	9.15533e+06	2007-09-01	14640		62.5365	0.669789
			2007-10-01	9229172	2007-10-01	14630.7		63.081	0.941734
			2007-11-01	9298646	2007-11-01	14687.8		63.3087	1.15898
			2007-12-01	9368120	2007-12-01	14726		63.616	1.18739
			2008-01-01	9437594	2008-01-01	14754.2		63.9656	1.34056
			2008-02-01	9.45573e+06	2008-02-01	14569		64.903	2.88435
			2008-03-01	9.47387e+06	2008-03-01	14629.9		64.7568	2.41855
			2008-04-01	9492006	2008-04-01	14698.8		64.577	2.74934
			2008-05-01	9669579	2008-05-01	14743.9		65.5835	3.59463
			2008-06-01	9847152	2008-06-01	14974.2		65.7609	3.63522
			2008-07-01	10024725	2008-07-01	14904.6		67.2593	4.67917
			2008-08-01	1.02498e+07	2008-08-01	14858.4		68.9831	6.65825
			2008-09-01	1.04748e+07	2008-09-01	14742.6		71.0511	8.51457
			2008-10-01	10699805	2008-10-01	14637		73.1011	10.0201
			2008-11-01	1.08422e+07	2008-11-01	14653.2		73.9921	10.6834
			2008-12-01	1.09846e+07	2008-12-01	14388.5		76.3428	12.7268
			2009-01-01	11126941	2009-01-01	14444.4		77.0331	13.0675
			2009-02-01	1.12664e+07	2009-02-01	14402.4		78.2256	13.3226
			2009-03-01	1.14058e+07	2009-03-01	14336.8		79.5561	14.7993
			2009-04-01	11545275	2009-04-01	14328.4		80.5759	15.999
			2009-05-01	1.16668e+07	2009-05-01	14350.2		81.3006	15.7171
			2009-06-01	1.17883e+07	2009-06-01	14379.9		81.9776	16.2166
			2009-07-01	11909828	2009-07-01	14347.7		83.0089	15.7496
			2009-08-01	1.20437e+07	2009-08-01	14454		83.3242	14.3411
			2009-09-01	1.21775e+07	2009-09-01	14459.3		84.2193	13.1682
			2009-10-01	12311349	2009-10-01	14670.9		83.9167	10.8156
			2009-11-01	1.24653e+07	2009-11-01	14642.5		85.1309	11.1388
			2009-12-01	1.26192e+07	2009-12-01	14570.7		86.6068	10.264
			2010-01-01	12773123	2010-01-01	14671.6		87.06	10.0269
			2010-02-01	1.2916e+07	2010-02-01	14691.7		87.9137	9.68817
			2010-03-01	1.30589e+07	2010-03-01	14800.7		88.2315	8.6754
			2010-04-01	13201792	2010-04-01	14898.5		88.6118	8.03584
			2010-05-01	1.33217e+07	2010-05-01	14899.1		89.413	8.11237
			2010-06-01	1.34417e+07	2010-06-01	14980.7		89.7265	7.74891
			2010-07-01	13561622	2010-07-01	15056.9		90.0693	7.06043
			2010-08-01	13716153	2010-08-01	15049.9		91.1381	7.8139
			2010-09-01	13870684	2010-09-01	15133		91.6584	7.43915
			2010-10-01	14025215	2010-10-01	15221.5		92.1408	8.22405
			2010-11-01	14106848	2010-11-01	15194.1		92.8445	7.71362
			2010-12-01	14188481	2010-12-01	15307		92.6929	6.08613
			2011-01-01	14270114	2011-01-01	15186.1		93.968	6.90804
			2011-02-01	1.42944e+07	2011-02-01	15220.2		93.9175	6.00376
			2011-03-01	1.43188e+07	2011-03-01	15451.1		92.6713	4.43976
			2011-04-01	14343087	2011-04-01	15525.3		92.3854	3.77358
			2011-05-01	1.44922e+07	2011-05-01	15505.6		93.4643	4.05137
			2011-06-01	1.46413e+07	2011-06-01	15457.7		94.7181	4.99156
			2011-07-01	14790340	2011-07-01	15560.8		95.0487	4.97942
			2011-08-01	14934540	2011-08-01	15658.7		95.3753	4.2372
			2011-09-01	15078740	2011-09-01	15556		96.9317	5.27331
			2011-10-01	15222940	2011-10-01	15812.2		96.2736	4.1328
			2011-11-01	1.53508e+07	2011-11-01	15789.7		97.2201	4.37557
			2011-12-01	1.54787e+07	2011-12-01	15787.5		98.0439	5.35097
			2012-01-01	15606518	2012-01-01	15888.9		98.223	4.25496
			2012-02-01	1.56894e+07	2012-02-01	16159.2		97.0922	3.17467
			2012-03-01	1.57722e+07	2012-03-01	16011.2		98.5075	5.83623
			2012-04-01	15855037	2012-04-01	16129.1		98.3008	5.91539
			2012-05-01	15925438	2012-05-01	16162.8		98.5311	5.06681
			2012-06-01	15995839	2012-06-01	16164.8		98.9547	4.23662
			2012-07-01	16066240	2012-07-01	16261.9		98.797	3.74825
			2012-08-01	1.61884e+07	2012-08-01	16207.5		99.8821	4.50688
			2012-09-01	1.63106e+07	2012-09-01	16302.1		100.052	3.12035
			2012-10-01	16432730	2012-10-01	16271.4		100.991	4.71774
			2012-11-01	1.65456e+07	2012-11-01	16345.7		101.223	4.00267
			2012-12-01	1.66585e+07	2012-12-01	16459.4		101.21	3.1656
			2013-01-01	16771381	2013-01-01	16610.6		100.968	2.74464
			2013-02-01	1.67604e+07	2013-02-01	16520.5		101.452	4.35988
			2013-03-01	1.67493e+07	2013-03-01	16577.6		101.036	2.52822
			2013-04-01	16738320	2013-04-01	16592.6		100.878	2.57755
			2013-05-01	1.67383e+07	2013-05-01	16584.2		100.929	2.39768
			2013-06-01	1.67382e+07	2013-06-01	16737		100.008	1.05291
			2013-07-01	16738180	2013-07-01	16784.2		99.7258	0.928869
			2013-08-01	16877493	2013-08-01	16873.3		100.025	0.142933
			2013-09-01	17016806	2013-09-01	16888.8		100.758	0.705913
			2013-10-01	17156119	2013-10-01	16997.7		100.932	-0.0590462
			2013-11-01	1.73045e+07	2013-11-01	17123.1		101.059	-0.163321
			2013-12-01	1.74529e+07	2013-12-01	17128.7		101.893	0.683094
			2014-01-01	17601227	2014-01-01	17023.5		103.393	2.42584
			2014-02-01	1.76117e+07	2014-02-01	17111.5		102.923	1.47097
			2014-03-01	1.76221e+07	2014-03-01	17173.7		102.611	1.57528
			2014-04-01	17632606	2014-04-01	17313.9		101.841	0.962666
			2014-05-01	1.76964e+07	2014-05-01	17430.2		101.527	0.598517
			2014-06-01	1.77602e+07	2014-06-01	17533.2		101.295	1.28723
			2014-07-01	17824071	2014-07-01	17650.6		100.983	1.25702
			2014-08-01	17929862	2014-08-01	17777.7		100.856	0.830935
			2014-09-01	18035653	2014-09-01	17731.2		101.717	0.958839
			2014-10-01	18141444	2014-10-01	17830.3		101.745	0.812477
			2014-11-01	1.8145e+07	2014-11-01	17850.7		101.649	0.589085
			2014-12-01	1.81485e+07	2014-12-01	17834.3		101.762	-0.13077
			2015-01-01	18152056	2015-01-01	17884.8		101.494	-1.89936
			2015-02-01	1.8152e+07	2015-02-01	18032.5		100.663	-2.25985
			2015-03-01	1.8152e+07	2015-03-01	17994		100.878	-1.73269
			2015-04-01	18151998	2015-04-01	18166.2		99.9216	-1.91936
			2015-05-01	18151538	2015-05-01	18201.6		99.7249	-1.80245
			2015-06-01	18151078	2015-06-01	18296		99.2077	-2.08716
			2015-07-01	18150618	2015-07-01	18288.7		99.2448	-1.73805
			2015-08-01	18407805	2015-08-01	18315.3		100.505	-0.350718
			2015-09-01	18664992	2015-09-01	18389.3		101.499	-0.217581
			2015-10-01	18922179	2015-10-01	18387.8		102.906	1.16155
			2015-11-01	1.90364e+07	2015-11-01	18324.1		103.887	2.23887
			2015-12-01	1.91507e+07	2015-12-01	18351.2		104.356	2.59451
			2016-01-01	19264939	2016-01-01	18359.4		104.932	3.43815
			2016-02-01	19303823	2016-02-01	18323.2		105.352	4.68881
			2016-03-01	19342707	2016-03-01	18544.8		104.303	3.42422
			2016-04-01	19381591	2016-04-01	18632.9		104.018	4.09663
			2016-05-01	1.94455e+07	2016-05-01	18607.4		104.504	4.77932
			2016-06-01	1.95095e+07	2016-06-01	18681.9		104.43	5.2223
			2016-07-01	19573445	2016-07-01	18672.2		104.826	5.58169
			2016-08-01	1.97079e+07	2016-08-01	18820.7		104.714	4.20878
			2016-09-01	1.98424e+07	2016-09-01	18906		104.953	3.45332
			2016-10-01	19976827	2016-10-01	18852.2		105.966	3.05931
			2016-11-01	19933358	2016-11-01	19018.2		104.812	0.92478
			2016-12-01	19889889	2016-12-01	19067.4		104.314	-0.0427002
			2017-01-01	19846420	2017-01-01	19090.1		103.962	-0.970319
			2017-02-01	19845798	2017-02-01	19132.3		103.729	-1.62254
			2017-03-01	19845176	2017-03-01	19265.3		103.01	-1.29255
			2017-04-01	19844554	2017-04-01	19213.8		103.283	-0.735335
			2017-05-01	1.9978e+07	2017-05-01	19383.4		103.068	-1.4364
			2017-06-01	2.01115e+07	2017-06-01	19480.2		103.24	-1.18962
			2017-07-01	20244900	2017-07-01	19477.3		103.941	-0.885669
			2017-08-01	2.03275e+07	2017-08-01	19594.2		103.742	-0.971817
			2017-09-01	2.04101e+07	2017-09-01	19692.6		103.643	-1.30915
			2017-10-01	20492747	2017-10-01	19712.5		103.958	-2.00761
			2017-11-01	2.06917e+07	2017-11-01	19866.7		104.153	-0.659223
			2017-12-01	2.08907e+07	2017-12-01	19916.3		104.892	0.578682
			2018-01-01	21089643	2018-01-01	19988.9		105.507	1.54492
			2018-02-01	2.11248e+07	2018-02-01	20051.7		105.351	1.62199
			2018-03-01	2.11599e+07	2018-03-01	20082.5		105.365	2.35489
			2018-04-01	21195070	2018-04-01	20279.4		104.515	1.23253
			2018-05-01	21302066	2018-05-01	20457.5		104.128	1.06039
			2018-06-01	21409062	2018-06-01	20499.1		104.439	1.19855
			2018-07-01	21516058	2018-07-01	20636.6		104.262	0.320844
			2018-08-01	2.16687e+07	2018-08-01	20638.5		104.992	1.24973
			2018-09-01	2.18214e+07	2018-09-01	20677.8		105.531	1.8873
			2018-10-01	21974096	2018-10-01	20777.4		105.76	1.80157
