# Supplementary material for: Optimal Macroeconomic Policy in Nonlinear Models: A VSTAR Perspective
Source: publisher site journal article supplement (doi:10.1515/snde-2024-0100), 2025-10-08
Supplement: Supplementary file 11 [file INDPRO.xls]

## Sheet: FRED Graph
FRED Graph Observations
Federal Reserve Economic Data
Link: https://fred.stlouisfed.org
Help: https://fred.stlouisfed.org/help-faq
Economic Research Division
Federal Reserve Bank of St. Louis
INDPRO_PC1	Industrial Production Index, Percent Change from Year Ago, Monthly, Seasonally Adjusted
Frequency: Monthly
observation_date	INDPRO_PC1
1978-01-01	5.07965
1978-02-01	4.02451
1978-03-01	4.69934
1978-04-01	5.89938
1978-05-01	5.38049
1978-06-01	5.34647
1978-07-01	5.14863
1978-08-01	5.51455
1978-09-01	5.27458
1978-10-01	5.91693
1978-11-01	6.59481
1978-12-01	7.00551
1979-01-01	7.80169
1979-02-01	7.84843
1979-03-01	6.16209
1979-04-01	2.82036
1979-05-01	3.28084
1979-06-01	2.56806
1979-07-01	2.47511
1979-08-01	1.41123
1979-09-01	1.26343
1979-10-01	1.01531
1979-11-01	0.16667
1979-12-01	-0.23919
1980-01-01	0.86457
1980-02-01	0.32775
1980-03-01	-0.31553
1980-04-01	-1.24247
1980-05-01	-4.40755
1980-06-01	-5.59365
1980-07-01	-6.20079
1980-08-01	-5.23076
1980-09-01	-3.80193
1980-10-01	-3.11449
1980-11-01	-1.34521
1980-12-01	-0.92675
1981-01-01	-1.93133
1981-02-01	-2.40338
1981-03-01	-1.55171
1981-04-01	0.05552
1981-05-01	3.16024
1981-06-01	4.95435
1981-07-01	6.46854
1981-08-01	6.07431
1981-09-01	3.77156
1981-10-01	1.77394
1981-11-01	-1.09751
1981-12-01	-2.72876
1982-01-01	-4.11883
1982-02-01	-1.76612
1982-03-01	-3.02928
1982-04-01	-3.45824
1982-05-01	-4.64393
1982-06-01	-5.41047
1982-07-01	-6.31815
1982-08-01	-7.12695
1982-09-01	-6.86257
1982-10-01	-7.06752
1982-11-01	-6.36239
1982-12-01	-6.01547
1983-01-01	-2.25194
1983-02-01	-4.74175
1983-03-01	-3.23116
1983-04-01	-1.17105
1983-05-01	0.14042
1983-06-01	1.07867
1983-07-01	2.93359
1983-08-01	4.99777
1983-09-01	6.91502
1983-10-01	8.77257
1983-11-01	9.59167
1983-12-01	10.9685
1984-01-01	11.0274
1984-02-01	12.218
1984-03-01	11.8525
1984-04-01	11.212
1984-05-01	10.9652
1984-06-01	10.6912
1984-07-01	9.38331
1984-08-01	8.27357
1984-09-01	6.46436
1984-10-01	5.42357
1984-11-01	5.45794
1984-12-01	5.04116
1985-01-01	2.81881
1985-02-01	2.73151
1985-03-01	2.39272
1985-04-01	1.46468
1985-05-01	1.14912
1985-06-01	0.86285
1985-07-01	-0.10876
1985-08-01	0.21021
1985-09-01	0.82075
1985-10-01	0.56898
1985-11-01	0.51137
1985-12-01	1.4503
1986-01-01	2.09258
1986-02-01	1.05582
1986-03-01	0.20949
1986-04-01	0.52211
1986-05-01	0.59004
1986-06-01	0.18727
1986-07-01	1.40189
1986-08-01	0.85595
1986-09-01	0.62732
1986-10-01	1.52308
1986-11-01	1.65154
1986-12-01	1.43272
1987-01-01	0.65624
1987-02-01	2.64481
1987-03-01	3.49974
1987-04-01	4.10109
1987-05-01	4.55253
1987-06-01	5.39225
1987-07-01	5.5385
1987-08-01	6.55136
1987-09-01	6.6148
1987-10-01	7.65207
1987-11-01	7.72447
1987-12-01	7.34255
1988-01-01	7.71747
1988-02-01	6.80042
1988-03-01	6.88002
1988-04-01	6.81665
1988-05-01	5.99437
1988-06-01	5.76951
1988-07-01	5.08373
1988-08-01	4.67547
1988-09-01	4.12367
1988-10-01	3.13213
1988-11-01	2.75337
1988-12-01	2.75216
1989-01-01	3.01275
1989-02-01	2.10559
1989-03-01	2.11523
1989-04-01	1.62562
1989-05-01	1.05447
1989-06-01	0.84887
1989-07-01	-0.08904
1989-08-01	0.38212
1989-09-01	0.29885
1989-10-01	-0.2624
1989-11-01	-0.09368
1989-12-01	0.04231
1990-01-01	-0.92843
1990-02-01	0.51409
1990-03-01	0.76923
1990-04-01	0.5233
1990-05-01	1.44375
1990-06-01	1.72282
1990-07-01	2.5116
1990-08-01	1.89846
1990-09-01	2.39855
1990-10-01	1.70487
1990-11-01	0.17917
1990-12-01	-1.07882
1991-01-01	-0.84677
1991-02-01	-2.49751
1991-03-01	-3.48147
1991-04-01	-3.12219
1991-05-01	-2.36921
1991-06-01	-1.79905
1991-07-01	-1.57805
1991-08-01	-1.79758
1991-09-01	-1.06673
1991-10-01	-0.47959
1991-11-01	0.58423
1991-12-01	0.84454
1992-01-01	0.72694
1992-02-01	2.13668
1992-03-01	3.54137
1992-04-01	4.10747
1992-05-01	3.41777
1992-06-01	2.5011
1992-07-01	3.31425
1992-08-01	2.72567
1992-09-01	2.06274
1992-10-01	3.00041
1992-11-01	3.56444
1992-12-01	4.05936
1993-01-01	5.09622
1993-02-01	4.81262
1993-03-01	3.80318
1993-04-01	3.38035
1993-05-01	2.6827
1993-06-01	2.84065
1993-07-01	2.2385
1993-08-01	2.63359
1993-09-01	2.88421
1993-10-01	2.90057
1993-11-01	2.89406
1993-12-01	3.35723
1994-01-01	3.29783
1994-02-01	2.87872
1994-03-01	4.0591
1994-04-01	4.28956
1994-05-01	5.18449
1994-06-01	5.67853
1994-07-01	5.51664
1994-08-01	6.25612
1994-09-01	6.15309
1994-10-01	6.23628
1994-11-01	6.44923
1994-12-01	6.98262
1995-01-01	6.77296
1995-02-01	6.58672
1995-03-01	5.66007
1995-04-01	4.99317
1995-05-01	4.81589
1995-06-01	4.50451
1995-07-01	3.93077
1995-08-01	4.62034
1995-09-01	4.64109
1995-10-01	3.63305
1995-11-01	3.24488
1995-12-01	2.57579
1996-01-01	1.72439
1996-02-01	3.45391
1996-03-01	3.20739
1996-04-01	4.22476
1996-05-01	4.6313
1996-06-01	5.15587
1996-07-01	5.43419
1996-08-01	4.71859
1996-09-01	5.02005
1996-10-01	5.09294
1996-11-01	5.75418
1996-12-01	6.04
1997-01-01	6.8832
1997-02-01	6.51119
1997-03-01	7.35939
1997-04-01	6.41057
1997-05-01	6.25278
1997-06-01	5.87542
1997-07-01	6.81323
1997-08-01	7.3131
1997-09-01	7.5292
1997-10-01	8.52266
1997-11-01	8.52359
1997-12-01	8.14282
1998-01-01	8.55871
1998-02-01	7.39525
1998-03-01	6.73824
1998-04-01	7.09602
1998-05-01	7.16218
1998-06-01	5.97245
1998-07-01	4.81762
1998-08-01	5.86427
1998-09-01	4.72787
1998-10-01	4.66191
1998-11-01	3.68476
1998-12-01	3.75081
1999-01-01	3.69958
1999-02-01	4.11466
1999-03-01	4.20562
1999-04-01	4.12466
1999-05-01	4.1694
1999-06-01	4.6555
1999-07-01	5.68312
1999-08-01	3.9953
1999-09-01	3.75892
1999-10-01	4.29411
1999-11-01	4.86047
1999-12-01	5.27366
2000-01-01	4.79626
2000-02-01	4.54756
2000-03-01	4.7769
2000-04-01	5.24785
2000-05-01	4.69864
2000-06-01	4.97527
2000-07-01	4.16391
2000-08-01	3.41737
2000-09-01	4.25272
2000-10-01	2.5805
2000-11-01	2.11014
2000-12-01	1.06887
2001-01-01	0.40193
2001-02-01	-0.48437
2001-03-01	-1.12593
2001-04-01	-2.12913
2001-05-01	-2.88356
2001-06-01	-3.55633
2001-07-01	-3.96284
2001-08-01	-3.81075
2001-09-01	-4.54609
2001-10-01	-4.67361
2001-11-01	-5.16738
2001-12-01	-4.88315
2002-01-01	-3.66165
2002-02-01	-3.09198
2002-03-01	-2.05291
2002-04-01	-1.36448
2002-05-01	-0.34172
2002-06-01	1.2115
2002-07-01	1.54493
2002-08-01	1.68196
2002-09-01	2.21734
2002-10-01	2.35488
2002-11-01	3.39679
2002-12-01	2.8656
2003-01-01	2.81189
2003-02-01	3.15988
2003-03-01	2.10651
2003-04-01	0.97633
2003-05-01	0.57623
2003-06-01	-0.20963
2003-07-01	0.46091
2003-08-01	0.31021
2003-09-01	0.76029
2003-10-01	1.21261
2003-11-01	1.47298
2003-12-01	1.88371
2004-01-01	1.56104
2004-02-01	1.84337
2004-03-01	1.56964
2004-04-01	2.74287
2004-05-01	3.5392
2004-06-01	2.5201
2004-07-01	2.86148
2004-08-01	3.09519
2004-09-01	2.57767
2004-10-01	3.3984
2004-11-01	2.82682
2004-12-01	3.65339
2005-01-01	3.8682
2005-02-01	3.9462
2005-03-01	4.31621
2005-04-01	4.00504
2005-05-01	3.32153
2005-06-01	4.58064
2005-07-01	3.4626
2005-08-01	3.66598
2005-09-01	1.6458
2005-10-01	1.95851
2005-11-01	2.77349
2005-12-01	2.6619
2006-01-01	2.30113
2006-02-01	1.62998
2006-03-01	1.9721
2006-04-01	2.23255
2006-05-01	1.99112
2006-06-01	1.99112
2006-07-01	2.27111
2006-08-01	2.38711
2006-09-01	4.11695
2006-10-01	2.76565
2006-11-01	1.62028
2006-12-01	2.06071
2007-01-01	1.41277
2007-02-01	2.44192
2007-03-01	2.4483
2007-04-01	2.76972
2007-05-01	2.91573
2007-06-01	2.5421
2007-07-01	2.53518
2007-08-01	2.35295
2007-09-01	2.9666
2007-10-01	2.59775
2007-11-01	3.2857
2007-12-01	2.25865
2008-01-01	2.51875
2008-02-01	1.12937
2008-03-01	0.68412
2008-04-01	-0.79338
2008-05-01	-1.3936
2008-06-01	-1.65521
2008-07-01	-2.13142
2008-08-01	-3.83602
2008-09-01	-8.36254
2008-10-01	-7.09753
2008-11-01	-8.78269
2008-12-01	-11.4862
2009-01-01	-13.362
2009-02-01	-13.6336
2009-03-01	-14.7946
2009-04-01	-14.8321
2009-05-01	-15.208
2009-06-01	-15.3319
2009-07-01	-13.9455
2009-08-01	-11.6128
2009-09-01	-6.91099
2009-10-01	-7.4974
2009-11-01	-5.93794
2009-12-01	-2.82117
2010-01-01	0.71589
2010-02-01	1.73578
2010-03-01	4.04669
2010-04-01	5.28235
2010-05-01	7.88374
2010-06-01	8.4559
2010-07-01	7.73329
2010-08-01	6.87216
2010-09-01	6.30174
2010-10-01	5.6767
2010-11-01	5.2972
2010-12-01	5.97288
2011-01-01	4.63697
2011-02-01	3.81209
2011-03-01	4.16228
2011-04-01	3.41276
2011-05-01	2.15899
2011-06-01	2.28419
2011-07-01	2.38844
2011-08-01	2.65066
2011-09-01	2.37357
2011-10-01	3.3586
2011-11-01	3.25308
2011-12-01	2.84899
2012-01-01	3.57623
2012-02-01	4.32352
2012-03-01	2.79303
2012-04-01	3.93707
2012-05-01	3.90399
2012-06-01	3.58105
2012-07-01	3.30923
2012-08-01	2.29296
2012-09-01	2.33698
2012-10-01	1.85781
2012-11-01	2.42028
2012-12-01	2.18366
2013-01-01	1.52032
2013-02-01	1.78856
2013-03-01	2.68174
2013-04-01	1.77917
2013-05-01	1.65452
2013-06-01	1.89989
2013-07-01	1.12805
2013-08-01	2.27439
2013-09-01	2.78594
2013-10-01	2.42171
2013-11-01	2.23884
2013-12-01	2.22736
2014-01-01	1.8115
2014-02-01	2.14451
2014-03-01	2.72121
2014-04-01	2.99651
2014-05-01	3.2485
2014-06-01	3.39367
2014-07-01	4.05625
2014-08-01	3.23354
2014-09-01	3.03222
2014-10-01	3.19044
2014-11-01	3.69474
2014-12-01	3.22608
2015-01-01	3.08835
2015-02-01	1.75451
2015-03-01	0.47452
2015-04-01	-0.17366
2015-05-01	-0.94196
2015-06-01	-1.63108
2015-07-01	-1.24724
2015-08-01	-1.27788
2015-09-01	-1.94979
2015-10-01	-2.32339
2015-11-01	-3.68516
2015-12-01	-3.97509
2016-01-01	-2.68783
2016-02-01	-2.91825
2016-03-01	-3.37258
2016-04-01	-2.68983
2016-05-01	-2.37
2016-06-01	-1.67954
2016-07-01	-2.01527
2016-08-01	-1.98441
2016-09-01	-1.73309
2016-10-01	-1.25894
2016-11-01	-0.87898
2016-12-01	0.5066
2017-01-01	-0.47762
2017-02-01	-0.18125
2017-03-01	1.16415
2017-04-01	1.93311
2017-05-01	2.07773
2017-06-01	1.78857
2017-07-01	1.4461
2017-08-01	1.10733
2017-09-01	1.22201
2017-10-01	2.65443
2017-11-01	3.40275
2017-12-01	2.90122
2018-01-01	2.82604
2018-02-01	3.67981
2018-03-01	3.62643
2018-04-01	3.80621
2018-05-01	2.95626
2018-06-01	3.53981
2018-07-01	4.12486
2018-08-01	5.42174
2018-09-01	5.58289
2018-10-01	4.18462
2018-11-01	4.0591
2018-12-01	3.95094
