# Supplementary material for: Optimal Macroeconomic Policy in Nonlinear Models: A VSTAR Perspective
Source: publisher site journal article supplement (doi:10.1515/snde-2024-0100), 2025-10-08
Supplement: Supplementary file 12 [file NROUST.xls]

## Sheet: FRED Graph
observation_date	NROUST
1977-01-01	6.23		1977-01-01	6.23
1977-04-01	6.23		1977-02-01	6.23
1977-07-01	6.24		1977-03-01	6.23
1977-10-01	6.24		1977-04-01	6.23
1978-01-01	6.24		1977-05-01	6.23333
1978-04-01	6.24		1977-06-01	6.23667
1978-07-01	6.24		1977-07-01	6.24
1978-10-01	6.24		1977-08-01	6.24
1979-01-01	6.24		1977-09-01	6.24
1979-04-01	6.23		1977-10-01	6.24
1979-07-01	6.23		1977-11-01	6.24
1979-10-01	6.22		1977-12-01	6.24
1980-01-01	6.22		1978-01-01	6.24
1980-04-01	6.21		1978-02-01	6.24
1980-07-01	6.2		1978-03-01	6.24
1980-10-01	6.2		1978-04-01	6.24
1981-01-01	6.19		1978-05-01	6.24
1981-04-01	6.18		1978-06-01	6.24
1981-07-01	6.17		1978-07-01	6.24
1981-10-01	6.16		1978-08-01	6.24
1982-01-01	6.15		1978-09-01	6.24
1982-04-01	6.14		1978-10-01	6.24
1982-07-01	6.13		1978-11-01	6.24
1982-10-01	6.12		1978-12-01	6.24
1983-01-01	6.11		1979-01-01	6.24
1983-04-01	6.1		1979-02-01	6.23667
1983-07-01	6.09		1979-03-01	6.23333
1983-10-01	6.09		1979-04-01	6.23
1984-01-01	6.08		1979-05-01	6.23
1984-04-01	6.07		1979-06-01	6.23
1984-07-01	6.06		1979-07-01	6.23
1984-10-01	6.05		1979-08-01	6.22667
1985-01-01	6.04		1979-09-01	6.22333
1985-04-01	6.03		1979-10-01	6.22
1985-07-01	6.02		1979-11-01	6.22
1985-10-01	6.01		1979-12-01	6.22
1986-01-01	6		1980-01-01	6.22
1986-04-01	5.99		1980-02-01	6.21667
1986-07-01	5.97		1980-03-01	6.21333
1986-10-01	5.96		1980-04-01	6.21
1987-01-01	5.95		1980-05-01	6.20667
1987-04-01	5.93		1980-06-01	6.20333
1987-07-01	5.92		1980-07-01	6.2
1987-10-01	5.9		1980-08-01	6.2
1988-01-01	5.89		1980-09-01	6.2
1988-04-01	5.87		1980-10-01	6.2
1988-07-01	5.85		1980-11-01	6.19667
1988-10-01	5.83		1980-12-01	6.19333
1989-01-01	5.81		1981-01-01	6.19
1989-04-01	5.79		1981-02-01	6.18667
1989-07-01	5.77		1981-03-01	6.18333
1989-10-01	5.75		1981-04-01	6.18
1990-01-01	5.73		1981-05-01	6.17667
1990-04-01	5.71		1981-06-01	6.17333
1990-07-01	5.69		1981-07-01	6.17
1990-10-01	5.67		1981-08-01	6.16667
1991-01-01	5.66		1981-09-01	6.16333
1991-04-01	5.64		1981-10-01	6.16
1991-07-01	5.62		1981-11-01	6.15667
1991-10-01	5.6		1981-12-01	6.15333
1992-01-01	5.59		1982-01-01	6.15
1992-04-01	5.57		1982-02-01	6.14667
1992-07-01	5.55		1982-03-01	6.14333
1992-10-01	5.54		1982-04-01	6.14
1993-01-01	5.52		1982-05-01	6.13667
1993-04-01	5.51		1982-06-01	6.13333
1993-07-01	5.49		1982-07-01	6.13
1993-10-01	5.48		1982-08-01	6.12667
1994-01-01	5.47		1982-09-01	6.12333
1994-04-01	5.45		1982-10-01	6.12
1994-07-01	5.44		1982-11-01	6.11667
1994-10-01	5.43		1982-12-01	6.11333
1995-01-01	5.42		1983-01-01	6.11
1995-04-01	5.41		1983-02-01	6.10667
1995-07-01	5.4		1983-03-01	6.10333
1995-10-01	5.39		1983-04-01	6.1
1996-01-01	5.38		1983-05-01	6.09667
1996-04-01	5.37		1983-06-01	6.09333
1996-07-01	5.36		1983-07-01	6.09
1996-10-01	5.35		1983-08-01	6.09
1997-01-01	5.34		1983-09-01	6.09
1997-04-01	5.33		1983-10-01	6.09
1997-07-01	5.32		1983-11-01	6.08667
1997-10-01	5.31		1983-12-01	6.08333
1998-01-01	5.3		1984-01-01	6.08
1998-04-01	5.29		1984-02-01	6.07667
1998-07-01	5.29		1984-03-01	6.07333
1998-10-01	5.28		1984-04-01	6.07
1999-01-01	5.27		1984-05-01	6.06667
1999-04-01	5.26		1984-06-01	6.06333
1999-07-01	5.25		1984-07-01	6.06
1999-10-01	5.24		1984-08-01	6.05667
2000-01-01	5.22		1984-09-01	6.05333
2000-04-01	5.21		1984-10-01	6.05
2000-07-01	5.2		1984-11-01	6.04667
2000-10-01	5.19		1984-12-01	6.04333
2001-01-01	5.18		1985-01-01	6.04
2001-04-01	5.17		1985-02-01	6.03667
2001-07-01	5.16		1985-03-01	6.03333
2001-10-01	5.15		1985-04-01	6.03
2002-01-01	5.14		1985-05-01	6.02667
2002-04-01	5.13		1985-06-01	6.02333
2002-07-01	5.12		1985-07-01	6.02
2002-10-01	5.11		1985-08-01	6.01667
2003-01-01	5.1		1985-09-01	6.01333
2003-04-01	5.09		1985-10-01	6.01
2003-07-01	5.08		1985-11-01	6.00667
2003-10-01	5.07		1985-12-01	6.00333
2004-01-01	5.06		1986-01-01	6
2004-04-01	5.05		1986-02-01	5.99667
2004-07-01	5.04		1986-03-01	5.99333
2004-10-01	5.03		1986-04-01	5.99
2005-01-01	5.02		1986-05-01	5.98333
2005-04-01	5.01		1986-06-01	5.97667
2005-07-01	5		1986-07-01	5.97
2005-10-01	5		1986-08-01	5.96667
2006-01-01	4.99		1986-09-01	5.96333
2006-04-01	4.99		1986-10-01	5.96
2006-07-01	4.98		1986-11-01	5.95667
2006-10-01	4.97		1986-12-01	5.95333
2007-01-01	4.95		1987-01-01	5.95
2007-04-01	4.93		1987-02-01	5.94333
2007-07-01	4.92		1987-03-01	5.93667
2007-10-01	4.9		1987-04-01	5.93
2008-01-01	4.89		1987-05-01	5.92667
2008-04-01	4.94		1987-06-01	5.92333
2008-07-01	4.96		1987-07-01	5.92
2008-10-01	5.07		1987-08-01	5.91333
2009-01-01	5.18		1987-09-01	5.90667
2009-04-01	5.25		1987-10-01	5.9
2009-07-01	5.36		1987-11-01	5.89667
2009-10-01	5.48		1987-12-01	5.89333
2010-01-01	5.62		1988-01-01	5.89
2010-04-01	5.66		1988-02-01	5.88333
2010-07-01	5.69		1988-03-01	5.87667
2010-10-01	5.73		1988-04-01	5.87
2011-01-01	5.76		1988-05-01	5.86333
2011-04-01	5.78		1988-06-01	5.85667
2011-07-01	5.79		1988-07-01	5.85
2011-10-01	5.8		1988-08-01	5.84333
2012-01-01	5.77		1988-09-01	5.83667
2012-04-01	5.73		1988-10-01	5.83
2012-07-01	5.66		1988-11-01	5.82333
2012-10-01	5.6		1988-12-01	5.81667
2013-01-01	5.46		1989-01-01	5.81
2013-04-01	5.31		1989-02-01	5.80333
2013-07-01	5.2		1989-03-01	5.79667
2013-10-01	5.09		1989-04-01	5.79
2014-01-01	4.98		1989-05-01	5.78333
2014-04-01	4.89		1989-06-01	5.77667
2014-07-01	4.82		1989-07-01	5.77
2014-10-01	4.76		1989-08-01	5.76333
2015-01-01	4.72		1989-09-01	5.75667
2015-04-01	4.69		1989-10-01	5.75
2015-07-01	4.66		1989-11-01	5.74333
2015-10-01	4.64		1989-12-01	5.73667
2016-01-01	4.63		1990-01-01	5.73
2016-04-01	4.62		1990-02-01	5.72333
2016-07-01	4.62		1990-03-01	5.71667
2016-10-01	4.62		1990-04-01	5.71
2017-01-01	4.62		1990-05-01	5.70333
2017-04-01	4.63		1990-06-01	5.69667
2017-07-01	4.62		1990-07-01	5.69
2017-10-01	4.62		1990-08-01	5.68333
2018-01-01	4.62		1990-09-01	5.67667
2018-04-01	4.62		1990-10-01	5.67
2018-07-01	4.62		1990-11-01	5.66667
2018-10-01	4.61		1990-12-01	5.66333
2019-01-01	4.61		1991-01-01	5.66
2019-04-01	4.61		1991-02-01	5.65333
2019-07-01	4.61		1991-03-01	5.64667
2019-10-01	4.61		1991-04-01	5.64
2020-01-01	4.61		1991-05-01	5.63333
2020-04-01	4.61		1991-06-01	5.62667
2020-07-01	4.6		1991-07-01	5.62
2020-10-01	4.6		1991-08-01	5.61333
2021-01-01	4.6		1991-09-01	5.60667
2021-04-01	4.6		1991-10-01	5.6
2021-07-01	4.6		1991-11-01	5.59667
2021-10-01	4.6		1991-12-01	5.59333
2022-01-01	4.59		1992-01-01	5.59
2022-04-01	4.59		1992-02-01	5.58333
2022-07-01	4.59		1992-03-01	5.57667
2022-10-01	4.59		1992-04-01	5.57
2023-01-01	4.59		1992-05-01	5.56333
2023-04-01	4.59		1992-06-01	5.55667
2023-07-01	4.59		1992-07-01	5.55
2023-10-01	4.58		1992-08-01	5.54667
2024-01-01	4.58		1992-09-01	5.54333
2024-04-01	4.58		1992-10-01	5.54
2024-07-01	4.58		1992-11-01	5.53333
2024-10-01	4.58		1992-12-01	5.52667
2025-01-01	4.58		1993-01-01	5.52
2025-04-01	4.57		1993-02-01	5.51667
2025-07-01	4.57		1993-03-01	5.51333
2025-10-01	4.57		1993-04-01	5.51
2026-01-01	4.57		1993-05-01	5.50333
2026-04-01	4.57		1993-06-01	5.49667
2026-07-01	4.57		1993-07-01	5.49
2026-10-01	4.57		1993-08-01	5.48667
2027-01-01	4.56		1993-09-01	5.48333
2027-04-01	4.56		1993-10-01	5.48
2027-07-01	4.56		1993-11-01	5.47667
2027-10-01	4.56		1993-12-01	5.47333
2028-01-01	4.56		1994-01-01	5.47
2028-04-01	4.56		1994-02-01	5.46333
2028-07-01	4.55		1994-03-01	5.45667
2028-10-01	4.55		1994-04-01	5.45
			1994-05-01	5.44667
			1994-06-01	5.44333
			1994-07-01	5.44
			1994-08-01	5.43667
			1994-09-01	5.43333
			1994-10-01	5.43
			1994-11-01	5.42667
			1994-12-01	5.42333
			1995-01-01	5.42
			1995-02-01	5.41667
			1995-03-01	5.41333
			1995-04-01	5.41
			1995-05-01	5.40667
			1995-06-01	5.40333
			1995-07-01	5.4
			1995-08-01	5.39667
			1995-09-01	5.39333
			1995-10-01	5.39
			1995-11-01	5.38667
			1995-12-01	5.38333
			1996-01-01	5.38
			1996-02-01	5.37667
			1996-03-01	5.37333
			1996-04-01	5.37
			1996-05-01	5.36667
			1996-06-01	5.36333
			1996-07-01	5.36
			1996-08-01	5.35667
			1996-09-01	5.35333
			1996-10-01	5.35
			1996-11-01	5.34667
			1996-12-01	5.34333
			1997-01-01	5.34
			1997-02-01	5.33667
			1997-03-01	5.33333
			1997-04-01	5.33
			1997-05-01	5.32667
			1997-06-01	5.32333
			1997-07-01	5.32
			1997-08-01	5.31667
			1997-09-01	5.31333
			1997-10-01	5.31
			1997-11-01	5.30667
			1997-12-01	5.30333
			1998-01-01	5.3
			1998-02-01	5.29667
			1998-03-01	5.29333
			1998-04-01	5.29
			1998-05-01	5.29
			1998-06-01	5.29
			1998-07-01	5.29
			1998-08-01	5.28667
			1998-09-01	5.28333
			1998-10-01	5.28
			1998-11-01	5.27667
			1998-12-01	5.27333
			1999-01-01	5.27
			1999-02-01	5.26667
			1999-03-01	5.26333
			1999-04-01	5.26
			1999-05-01	5.25667
			1999-06-01	5.25333
			1999-07-01	5.25
			1999-08-01	5.24667
			1999-09-01	5.24333
			1999-10-01	5.24
			1999-11-01	5.23333
			1999-12-01	5.22667
			2000-01-01	5.22
			2000-02-01	5.21667
			2000-03-01	5.21333
			2000-04-01	5.21
			2000-05-01	5.20667
			2000-06-01	5.20333
			2000-07-01	5.2
			2000-08-01	5.19667
			2000-09-01	5.19333
			2000-10-01	5.19
			2000-11-01	5.18667
			2000-12-01	5.18333
			2001-01-01	5.18
			2001-02-01	5.17667
			2001-03-01	5.17333
			2001-04-01	5.17
			2001-05-01	5.16667
			2001-06-01	5.16333
			2001-07-01	5.16
			2001-08-01	5.15667
			2001-09-01	5.15333
			2001-10-01	5.15
			2001-11-01	5.14667
			2001-12-01	5.14333
			2002-01-01	5.14
			2002-02-01	5.13667
			2002-03-01	5.13333
			2002-04-01	5.13
			2002-05-01	5.12667
			2002-06-01	5.12333
			2002-07-01	5.12
			2002-08-01	5.11667
			2002-09-01	5.11333
			2002-10-01	5.11
			2002-11-01	5.10667
			2002-12-01	5.10333
			2003-01-01	5.1
			2003-02-01	5.09667
			2003-03-01	5.09333
			2003-04-01	5.09
			2003-05-01	5.08667
			2003-06-01	5.08333
			2003-07-01	5.08
			2003-08-01	5.07667
			2003-09-01	5.07333
			2003-10-01	5.07
			2003-11-01	5.06667
			2003-12-01	5.06333
			2004-01-01	5.06
			2004-02-01	5.05667
			2004-03-01	5.05333
			2004-04-01	5.05
			2004-05-01	5.04667
			2004-06-01	5.04333
			2004-07-01	5.04
			2004-08-01	5.03667
			2004-09-01	5.03333
			2004-10-01	5.03
			2004-11-01	5.02667
			2004-12-01	5.02333
			2005-01-01	5.02
			2005-02-01	5.01667
			2005-03-01	5.01333
			2005-04-01	5.01
			2005-05-01	5.00667
			2005-06-01	5.00333
			2005-07-01	5
			2005-08-01	5
			2005-09-01	5
			2005-10-01	5
			2005-11-01	4.99667
			2005-12-01	4.99333
			2006-01-01	4.99
			2006-02-01	4.99
			2006-03-01	4.99
			2006-04-01	4.99
			2006-05-01	4.98667
			2006-06-01	4.98333
			2006-07-01	4.98
			2006-08-01	4.97667
			2006-09-01	4.97333
			2006-10-01	4.97
			2006-11-01	4.96333
			2006-12-01	4.95667
			2007-01-01	4.95
			2007-02-01	4.94333
			2007-03-01	4.93667
			2007-04-01	4.93
			2007-05-01	4.92667
			2007-06-01	4.92333
			2007-07-01	4.92
			2007-08-01	4.91333
			2007-09-01	4.90667
			2007-10-01	4.9
			2007-11-01	4.89667
			2007-12-01	4.89333
			2008-01-01	4.89
			2008-02-01	4.90667
			2008-03-01	4.92333
			2008-04-01	4.94
			2008-05-01	4.94667
			2008-06-01	4.95333
			2008-07-01	4.96
			2008-08-01	4.99667
			2008-09-01	5.03333
			2008-10-01	5.07
			2008-11-01	5.10667
			2008-12-01	5.14333
			2009-01-01	5.18
			2009-02-01	5.20333
			2009-03-01	5.22667
			2009-04-01	5.25
			2009-05-01	5.28667
			2009-06-01	5.32333
			2009-07-01	5.36
			2009-08-01	5.4
			2009-09-01	5.44
			2009-10-01	5.48
			2009-11-01	5.52667
			2009-12-01	5.57333
			2010-01-01	5.62
			2010-02-01	5.63333
			2010-03-01	5.64667
			2010-04-01	5.66
			2010-05-01	5.67
			2010-06-01	5.68
			2010-07-01	5.69
			2010-08-01	5.70333
			2010-09-01	5.71667
			2010-10-01	5.73
			2010-11-01	5.74
			2010-12-01	5.75
			2011-01-01	5.76
			2011-02-01	5.76667
			2011-03-01	5.77333
			2011-04-01	5.78
			2011-05-01	5.78333
			2011-06-01	5.78667
			2011-07-01	5.79
			2011-08-01	5.79333
			2011-09-01	5.79667
			2011-10-01	5.8
			2011-11-01	5.79
			2011-12-01	5.78
			2012-01-01	5.77
			2012-02-01	5.75667
			2012-03-01	5.74333
			2012-04-01	5.73
			2012-05-01	5.70667
			2012-06-01	5.68333
			2012-07-01	5.66
			2012-08-01	5.64
			2012-09-01	5.62
			2012-10-01	5.6
			2012-11-01	5.55333
			2012-12-01	5.50667
			2013-01-01	5.46
			2013-02-01	5.41
			2013-03-01	5.36
			2013-04-01	5.31
			2013-05-01	5.27333
			2013-06-01	5.23667
			2013-07-01	5.2
			2013-08-01	5.16333
			2013-09-01	5.12667
			2013-10-01	5.09
			2013-11-01	5.05333
			2013-12-01	5.01667
			2014-01-01	4.98
			2014-02-01	4.95
			2014-03-01	4.92
			2014-04-01	4.89
			2014-05-01	4.86667
			2014-06-01	4.84333
			2014-07-01	4.82
			2014-08-01	4.8
			2014-09-01	4.78
			2014-10-01	4.76
			2014-11-01	4.74667
			2014-12-01	4.73333
			2015-01-01	4.72
			2015-02-01	4.71
			2015-03-01	4.7
			2015-04-01	4.69
			2015-05-01	4.68
			2015-06-01	4.67
			2015-07-01	4.66
			2015-08-01	4.65333
			2015-09-01	4.64667
			2015-10-01	4.64
			2015-11-01	4.63667
			2015-12-01	4.63333
			2016-01-01	4.63
			2016-02-01	4.62667
			2016-03-01	4.62333
			2016-04-01	4.62
			2016-05-01	4.62
			2016-06-01	4.62
			2016-07-01	4.62
			2016-08-01	4.62
			2016-09-01	4.62
			2016-10-01	4.62
			2016-11-01	4.62
			2016-12-01	4.62
			2017-01-01	4.62
			2017-02-01	4.62333
			2017-03-01	4.62667
			2017-04-01	4.63
			2017-05-01	4.62667
			2017-06-01	4.62333
			2017-07-01	4.62
			2017-08-01	4.62
			2017-09-01	4.62
			2017-10-01	4.62
			2017-11-01	4.62
			2017-12-01	4.62
			2018-01-01	4.62
			2018-02-01	4.62
			2018-03-01	4.62
			2018-04-01	4.62
			2018-05-01	4.62
			2018-06-01	4.62
			2018-07-01	4.62
			2018-08-01	4.61667
			2018-09-01	4.61333
			2018-10-01	4.61
			2018-11-01	4.61
			2018-12-01	4.61
			2019-01-01	4.61
			2019-02-01	4.61
			2019-03-01	4.61
			2019-04-01	4.61
			2019-05-01	4.61
			2019-06-01	4.61
			2019-07-01	4.61
			2019-08-01	4.61
			2019-09-01	4.61
			2019-10-01	4.61
			2019-11-01	4.61
			2019-12-01	4.61
			2020-01-01	4.61
			2020-02-01	4.61
			2020-03-01	4.61
			2020-04-01	4.61
			2020-05-01	4.60667
			2020-06-01	4.60333
			2020-07-01	4.6
			2020-08-01	4.6
			2020-09-01	4.6
			2020-10-01	4.6
			2020-11-01	4.6
			2020-12-01	4.6
			2021-01-01	4.6
			2021-02-01	4.6
			2021-03-01	4.6
			2021-04-01	4.6
			2021-05-01	4.6
			2021-06-01	4.6
			2021-07-01	4.6
			2021-08-01	4.6
			2021-09-01	4.6
			2021-10-01	4.6
			2021-11-01	4.59667
			2021-12-01	4.59333
			2022-01-01	4.59
			2022-02-01	4.59
			2022-03-01	4.59
			2022-04-01	4.59
			2022-05-01	4.59
			2022-06-01	4.59
			2022-07-01	4.59
			2022-08-01	4.59
			2022-09-01	4.59
			2022-10-01	4.59
			2022-11-01	4.59
			2022-12-01	4.59
			2023-01-01	4.59
			2023-02-01	4.59
			2023-03-01	4.59
			2023-04-01	4.59
			2023-05-01	4.59
			2023-06-01	4.59
			2023-07-01	4.59
			2023-08-01	4.58667
			2023-09-01	4.58333
			2023-10-01	4.58
			2023-11-01	4.58
			2023-12-01	4.58
			2024-01-01	4.58
			2024-02-01	4.58
			2024-03-01	4.58
			2024-04-01	4.58
			2024-05-01	4.58
			2024-06-01	4.58
			2024-07-01	4.58
			2024-08-01	4.58
			2024-09-01	4.58
			2024-10-01	4.58
			2024-11-01	4.58
			2024-12-01	4.58
			2025-01-01	4.58
			2025-02-01	4.57667
			2025-03-01	4.57333
			2025-04-01	4.57
			2025-05-01	4.57
			2025-06-01	4.57
			2025-07-01	4.57
			2025-08-01	4.57
			2025-09-01	4.57
			2025-10-01	4.57
			2025-11-01	4.57
			2025-12-01	4.57
			2026-01-01	4.57
			2026-02-01	4.57
			2026-03-01	4.57
			2026-04-01	4.57
			2026-05-01	4.57
			2026-06-01	4.57
			2026-07-01	4.57
			2026-08-01	4.57
			2026-09-01	4.57
			2026-10-01	4.57
			2026-11-01	4.56667
			2026-12-01	4.56333
			2027-01-01	4.56
			2027-02-01	4.56
			2027-03-01	4.56
			2027-04-01	4.56
			2027-05-01	4.56
			2027-06-01	4.56
			2027-07-01	4.56
			2027-08-01	4.56
			2027-09-01	4.56
			2027-10-01	4.56
			2027-11-01	4.56
			2027-12-01	4.56
			2028-01-01	4.56
			2028-02-01	4.56
			2028-03-01	4.56
			2028-04-01	4.56
			2028-05-01	4.55667
			2028-06-01	4.55333
			2028-07-01	4.55
			2028-08-01	4.55
			2028-09-01	4.55
			2028-10-01	4.55
