# Supplementary material for: Optimal Macroeconomic Policy in Nonlinear Models: A VSTAR Perspective
Source: publisher site journal article supplement (doi:10.1515/snde-2024-0100), 2025-10-08
Supplement: Supplementary file 13 [file PCE.xls]

## Sheet: FRED Graph
FRED Graph Observations
Federal Reserve Economic Data
Link: https://fred.stlouisfed.org
Help: https://fred.stlouisfed.org/help-faq
Economic Research Division
Federal Reserve Bank of St. Louis
PCE_PC1	Personal Consumption Expenditures, Percent Change from Year Ago, Monthly, Seasonally Adjusted Annual Rate
Frequency: Monthly
observation_date	PCE_PC1
1978-01-01	9.42387
1978-02-01	10.0544
1978-03-01	11.2412
1978-04-01	11.9538
1978-05-01	12.322
1978-06-01	12.8363
1978-07-01	11.4252
1978-08-01	12.5457
1978-09-01	12.2364
1978-10-01	11.8576
1978-11-01	11.575
1978-12-01	12.0135
1979-01-01	13.0049
1979-02-01	12.0065
1979-03-01	11.1579
1979-04-01	10.169
1979-05-01	10.3966
1979-06-01	10.5134
1979-07-01	11.1648
1979-08-01	11.6517
1979-09-01	12.4578
1979-10-01	11.9095
1979-11-01	11.9344
1979-12-01	11.3465
1980-01-01	12.9726
1980-02-01	12.0965
1980-03-01	11.5596
1980-04-01	10.1924
1980-05-01	9.06467
1980-06-01	9.08168
1980-07-01	10.1507
1980-08-01	9.17306
1980-09-01	8.9724
1980-10-01	10.6908
1980-11-01	10.2275
1980-12-01	11.1265
1981-01-01	10.175
1981-02-01	10.7441
1981-03-01	11.398
1981-04-01	12.3407
1981-05-01	12.5699
1981-06-01	12.5495
1981-07-01	11.1614
1981-08-01	11.4979
1981-09-01	10.3903
1981-10-01	8.07881
1981-11-01	7.87169
1981-12-01	7.40401
1982-01-01	6.79679
1982-02-01	7.27099
1982-03-01	6.36923
1982-04-01	6.40097
1982-05-01	6.82934
1982-06-01	5.87232
1982-07-01	6.69893
1982-08-01	5.77138
1982-09-01	7.07708
1982-10-01	8.2438
1982-11-01	9.0683
1982-12-01	8.68866
1983-01-01	8.85784
1983-02-01	7.70829
1983-03-01	8.82862
1983-04-01	9.87514
1983-05-01	9.85082
1983-06-01	11.1274
1983-07-01	11.2055
1983-08-01	11.5523
1983-09-01	10.9427
1983-10-01	10.9041
1983-11-01	10.0963
1983-12-01	10.7328
1984-01-01	11.288
1984-02-01	10.4042
1984-03-01	10.3868
1984-04-01	10.38
1984-05-01	10.1785
1984-06-01	9.64851
1984-07-01	8.25378
1984-08-01	8.26582
1984-09-01	8.51857
1984-10-01	7.36766
1984-11-01	8.66754
1984-12-01	7.89606
1985-01-01	8.24171
1985-02-01	9.8731
1985-03-01	8.92005
1985-04-01	8.21974
1985-05-01	8.96747
1985-06-01	7.76567
1985-07-01	8.86314
1985-08-01	9.5494
1985-09-01	10.2968
1985-10-01	8.86896
1985-11-01	7.7662
1985-12-01	8.85542
1986-01-01	7.95402
1986-02-01	6.7934
1986-03-01	6.61129
1986-04-01	6.6065
1986-05-01	5.97463
1986-06-01	6.40663
1986-07-01	6.09419
1986-08-01	5.32321
1986-09-01	6.337
1986-10-01	6.42645
1986-11-01	5.67645
1986-12-01	6.60904
1987-01-01	3.83432
1987-02-01	6.43571
1987-03-01	6.71837
1987-04-01	7.18115
1987-05-01	6.68066
1987-06-01	7.37673
1987-07-01	7.41011
1987-08-01	8.01076
1987-09-01	5.2056
1987-10-01	6.87374
1987-11-01	7.36921
1987-12-01	5.90571
1988-01-01	9.47709
1988-02-01	7.31919
1988-03-01	8.20363
1988-04-01	7.37791
1988-05-01	8.04356
1988-06-01	7.99596
1988-07-01	8.0137
1988-08-01	7.57634
1988-09-01	7.94818
1988-10-01	8.90732
1988-11-01	9.09611
1988-12-01	8.99783
1989-01-01	8.40153
1989-02-01	8.2759
1989-03-01	7.30869
1989-04-01	8.58106
1989-05-01	7.83945
1989-06-01	7.47627
1989-07-01	7.26957
1989-08-01	7.5
1989-09-01	7.31556
1989-10-01	6.44169
1989-11-01	6.21247
1989-12-01	6.489
1990-01-01	7.09016
1990-02-01	6.88647
1990-03-01	7.31965
1990-04-01	6.407
1990-05-01	6.30666
1990-06-01	6.67022
1990-07-01	6.5817
1990-08-01	6.28901
1990-09-01	6.85276
1990-10-01	6.52246
1990-11-01	6.27453
1990-12-01	4.80701
1991-01-01	2.95655
1991-02-01	3.71493
1991-03-01	4.2105
1991-04-01	3.6366
1991-05-01	4.16865
1991-06-01	3.57471
1991-07-01	3.77581
1991-08-01	3.13905
1991-09-01	2.96116
1991-10-01	2.72309
1991-11-01	3.40143
1991-12-01	4.12296
1992-01-01	6.3447
1992-02-01	6.02064
1992-03-01	5.21339
1992-04-01	5.74339
1992-05-01	5.72562
1992-06-01	6.00431
1992-07-01	6.02118
1992-08-01	6.34401
1992-09-01	6.79098
1992-10-01	7.76408
1992-11-01	7.41583
1992-12-01	7.85723
1993-01-01	6.26729
1993-02-01	6.23979
1993-03-01	5.72018
1993-04-01	6.3391
1993-05-01	6.3486
1993-06-01	6.29384
1993-07-01	6.28092
1993-08-01	6.16456
1993-09-01	6.02073
1993-10-01	5.79037
1993-11-01	5.89699
1993-12-01	5.41232
1994-01-01	5.63043
1994-02-01	6.36696
1994-03-01	6.74325
1994-04-01	6.32084
1994-05-01	5.58746
1994-06-01	6.05631
1994-07-01	5.63226
1994-08-01	6.28194
1994-09-01	5.84063
1994-10-01	6.1794
1994-11-01	5.96166
1994-12-01	5.91761
1995-01-01	5.80358
1995-02-01	4.7101
1995-03-01	5.15282
1995-04-01	4.69054
1995-05-01	5.64514
1995-06-01	5.70409
1995-07-01	5.28746
1995-08-01	5.09596
1995-09-01	5.14136
1995-10-01	4.17628
1995-11-01	4.76625
1995-12-01	5.28544
1996-01-01	4.83386
1996-02-01	5.81347
1996-03-01	5.89307
1996-04-01	6.49871
1996-05-01	5.89285
1996-06-01	5.06881
1996-07-01	5.66778
1996-08-01	5.38829
1996-09-01	5.49945
1996-10-01	6.27456
1996-11-01	5.84698
1996-12-01	5.51447
1997-01-01	6.39833
1997-02-01	5.86814
1997-03-01	5.4298
1997-04-01	4.82527
1997-05-01	4.52544
1997-06-01	5.05564
1997-07-01	5.65319
1997-08-01	5.91469
1997-09-01	5.7603
1997-10-01	5.80276
1997-11-01	5.79122
1997-12-01	5.82865
1998-01-01	5.15237
1998-02-01	5.33309
1998-03-01	5.42884
1998-04-01	6.02275
1998-05-01	6.91733
1998-06-01	6.87088
1998-07-01	6.14908
1998-08-01	6.04976
1998-09-01	6.49624
1998-10-01	6.40509
1998-11-01	6.2585
1998-12-01	6.64781
1999-01-01	6.73123
1999-02-01	6.604
1999-03-01	6.65357
1999-04-01	7.05067
1999-05-01	6.6428
1999-06-01	6.51089
1999-07-01	6.64686
1999-08-01	6.77637
1999-09-01	6.92638
1999-10-01	6.72301
1999-11-01	7.02364
1999-12-01	7.71271
2000-01-01	7.61415
2000-02-01	8.48766
2000-03-01	9.01531
2000-04-01	7.66437
2000-05-01	7.7405
2000-06-01	7.83339
2000-07-01	7.68288
2000-08-01	7.47017
2000-09-01	7.90274
2000-10-01	7.59282
2000-11-01	7.21509
2000-12-01	6.22448
2001-01-01	6.75868
2001-02-01	5.68153
2001-03-01	4.51853
2001-04-01	4.94821
2001-05-01	5.06142
2001-06-01	4.69758
2001-07-01	4.55493
2001-08-01	4.55649
2001-09-01	1.88729
2001-10-01	4.64853
2001-11-01	3.84649
2001-12-01	2.90827
2002-01-01	2.82786
2002-02-01	3.18048
2002-03-01	3.5676
2002-04-01	4.34497
2002-05-01	3.34322
2002-06-01	3.64695
2002-07-01	4.35791
2002-08-01	4.11597
2002-09-01	5.393
2002-10-01	3.0839
2002-11-01	4.07093
2002-12-01	5.10794
2003-01-01	5.00118
2003-02-01	4.39993
2003-03-01	4.99088
2003-04-01	4.32009
2003-05-01	4.74275
2003-06-01	4.92471
2003-07-01	4.84798
2003-08-01	5.85017
2003-09-01	6.00731
2003-10-01	5.58494
2003-11-01	5.89702
2003-12-01	5.54254
2004-01-01	6.03072
2004-02-01	6.42126
2004-03-01	6.28553
2004-04-01	6.13568
2004-05-01	7.01485
2004-06-01	6.10267
2004-07-01	6.21204
2004-08-01	5.34303
2004-09-01	6.20421
2004-10-01	6.74127
2004-11-01	6.59527
2004-12-01	6.96539
2005-01-01	6.04452
2005-02-01	6.35178
2005-03-01	6.1107
2005-04-01	6.88623
2005-05-01	5.88862
2005-06-01	7.08955
2005-07-01	7.42922
2005-08-01	7.01918
2005-09-01	6.78636
2005-10-01	6.59136
2005-11-01	6.15039
2005-12-01	5.75488
2006-01-01	6.96087
2006-02-01	6.57623
2006-03-01	6.44845
2006-04-01	6.12103
2006-05-01	6.60813
2006-06-01	5.91418
2006-07-01	5.58469
2006-08-01	5.54096
2006-09-01	5.27696
2006-10-01	5.00302
2006-11-01	4.94155
2006-12-01	5.5677
2007-01-01	5.03874
2007-02-01	5.02415
2007-03-01	5.07559
2007-04-01	4.80555
2007-05-01	4.73354
2007-06-01	4.6154
2007-07-01	4.1512
2007-08-01	4.63537
2007-09-01	4.73773
2007-10-01	4.84146
2007-11-01	5.51801
2007-12-01	4.64041
2008-01-01	4.34728
2008-02-01	3.84003
2008-03-01	3.90502
2008-04-01	3.96331
2008-05-01	4.17042
2008-06-01	4.55763
2008-07-01	4.06917
2008-08-01	3.49399
2008-09-01	2.50666
2008-10-01	1.35647
2008-11-01	-0.77795
2008-12-01	-1.79343
2009-01-01	-1.47231
2009-02-01	-1.48688
2009-03-01	-2.41882
2009-04-01	-2.72087
2009-05-01	-3.03268
2009-06-01	-2.97787
2009-07-01	-2.60275
2009-08-01	-1.32446
2009-09-01	-1.59407
2009-10-01	-0.28513
2009-11-01	1.21884
2009-12-01	2.75623
2010-01-01	2.22817
2010-02-01	2.7094
2010-03-01	3.81335
2010-04-01	3.99083
2010-05-01	3.91942
2010-06-01	3.51283
2010-07-01	3.48517
2010-08-01	2.68246
2010-09-01	3.69913
2010-10-01	3.75356
2010-11-01	4.16679
2010-12-01	3.93243
2011-01-01	4.33622
2011-02-01	4.38159
2011-03-01	4.57325
2011-04-01	4.694
2011-05-01	4.7478
2011-06-01	4.78161
2011-07-01	4.83863
2011-08-01	4.6186
2011-09-01	4.77217
2011-10-01	4.35141
2011-11-01	3.90934
2011-12-01	3.65759
2012-01-01	4.08797
2012-02-01	4.61696
2012-03-01	3.80361
2012-04-01	3.70339
2012-05-01	3.36035
2012-06-01	2.90971
2012-07-01	2.80684
2012-08-01	2.83629
2012-09-01	3.01171
2012-10-01	3.22419
2012-11-01	3.50667
2012-12-01	3.41899
2013-01-01	3.13659
2013-02-01	2.61195
2013-03-01	2.51374
2013-04-01	2.05561
2013-05-01	2.51627
2013-06-01	2.9462
2013-07-01	2.91058
2013-08-01	2.95435
2013-09-01	2.76093
2013-10-01	2.88293
2013-11-01	3.14992
2013-12-01	3.38764
2014-01-01	2.76449
2014-02-01	2.9058
2014-03-01	3.70443
2014-04-01	4.43715
2014-05-01	4.48037
2014-06-01	4.86476
2014-07-01	4.99084
2014-08-01	5.42933
2014-09-01	5.19491
2014-10-01	5.28205
2014-11-01	4.9079
2014-12-01	4.72395
2015-01-01	4.63409
2015-02-01	4.463
2015-03-01	4.42584
2015-04-01	4.19736
2015-05-01	4.42358
2015-06-01	4.15757
2015-07-01	4.17267
2015-08-01	3.76498
2015-09-01	3.64126
2015-10-01	3.26957
2015-11-01	3.30833
2015-12-01	3.37506
2016-01-01	3.62112
2016-02-01	3.87092
2016-03-01	3.19864
2016-04-01	3.70926
2016-05-01	3.50747
2016-06-01	3.79256
2016-07-01	3.5183
2016-08-01	3.61304
2016-09-01	4.12094
2016-10-01	4.25576
2016-11-01	4.26021
2016-12-01	4.60418
2017-01-01	4.93823
2017-02-01	4.25654
2017-03-01	4.87918
2017-04-01	4.41164
2017-05-01	4.18242
2017-06-01	3.84341
2017-07-01	3.92491
2017-08-01	3.87251
2017-09-01	4.20506
2017-10-01	4.33389
2017-11-01	4.76099
2017-12-01	4.5265
2018-01-01	4.3058
2018-02-01	4.29217
2018-03-01	4.33834
2018-04-01	4.55317
2018-05-01	4.92158
2018-06-01	5.0874
2018-07-01	5.38892
2018-08-01	5.4239
2018-09-01	4.71735
2018-10-01	5.06164
2018-11-01	4.74317
