# Supplementary material for: Optimal Macroeconomic Policy in Nonlinear Models: A VSTAR Perspective
Source: publisher site journal article supplement (doi:10.1515/snde-2024-0100), 2025-10-08
Supplement: Supplementary file 14 [file UNRATE.xls]

## Sheet: FRED Graph
FRED Graph Observations
Federal Reserve Economic Data
Link: https://fred.stlouisfed.org
Help: https://fred.stlouisfed.org/help-faq
Economic Research Division
Federal Reserve Bank of St. Louis
UNRATE	Civilian Unemployment Rate, Percent, Monthly, Seasonally Adjusted
Frequency: Monthly
observation_date	UNRATE	NROUST	DEV
1978-01-01	6.4	6.24	0.16
1978-02-01	6.3	6.24	0.06
1978-03-01	6.3	6.24	0.06
1978-04-01	6.1	6.24	-0.14
1978-05-01	6	6.24	-0.24
1978-06-01	5.9	6.24	-0.34
1978-07-01	6.2	6.24	-0.04
1978-08-01	5.9	6.24	-0.34
1978-09-01	6	6.24	-0.24
1978-10-01	5.8	6.24	-0.44
1978-11-01	5.9	6.24	-0.34
1978-12-01	6	6.24	-0.24
1979-01-01	5.9	6.24	-0.34
1979-02-01	5.9	6.23667	-0.336667
1979-03-01	5.8	6.23333	-0.433333
1979-04-01	5.8	6.23	-0.43
1979-05-01	5.6	6.23	-0.63
1979-06-01	5.7	6.23	-0.53
1979-07-01	5.7	6.23	-0.53
1979-08-01	6	6.22667	-0.226667
1979-09-01	5.9	6.22333	-0.323333
1979-10-01	6	6.22	-0.22
1979-11-01	5.9	6.22	-0.32
1979-12-01	6	6.22	-0.22
1980-01-01	6.3	6.22	0.08
1980-02-01	6.3	6.21667	0.0833333
1980-03-01	6.3	6.21333	0.0866667
1980-04-01	6.9	6.21	0.69
1980-05-01	7.5	6.20667	1.29333
1980-06-01	7.6	6.20333	1.39667
1980-07-01	7.8	6.2	1.6
1980-08-01	7.7	6.2	1.5
1980-09-01	7.5	6.2	1.3
1980-10-01	7.5	6.2	1.3
1980-11-01	7.5	6.19667	1.30333
1980-12-01	7.2	6.19333	1.00667
1981-01-01	7.5	6.19	1.31
1981-02-01	7.4	6.18667	1.21333
1981-03-01	7.4	6.18333	1.21667
1981-04-01	7.2	6.18	1.02
1981-05-01	7.5	6.17667	1.32333
1981-06-01	7.5	6.17333	1.32667
1981-07-01	7.2	6.17	1.03
1981-08-01	7.4	6.16667	1.23333
1981-09-01	7.6	6.16333	1.43667
1981-10-01	7.9	6.16	1.74
1981-11-01	8.3	6.15667	2.14333
1981-12-01	8.5	6.15333	2.34667
1982-01-01	8.6	6.15	2.45
1982-02-01	8.9	6.14667	2.75333
1982-03-01	9	6.14333	2.85667
1982-04-01	9.3	6.14	3.16
1982-05-01	9.4	6.13667	3.26333
1982-06-01	9.6	6.13333	3.46667
1982-07-01	9.8	6.13	3.67
1982-08-01	9.8	6.12667	3.67333
1982-09-01	10.1	6.12333	3.97667
1982-10-01	10.4	6.12	4.28
1982-11-01	10.8	6.11667	4.68333
1982-12-01	10.8	6.11333	4.68667
1983-01-01	10.4	6.11	4.29
1983-02-01	10.4	6.10667	4.29333
1983-03-01	10.3	6.10333	4.19667
1983-04-01	10.2	6.1	4.1
1983-05-01	10.1	6.09667	4.00333
1983-06-01	10.1	6.09333	4.00667
1983-07-01	9.4	6.09	3.31
1983-08-01	9.5	6.09	3.41
1983-09-01	9.2	6.09	3.11
1983-10-01	8.8	6.09	2.71
1983-11-01	8.5	6.08667	2.41333
1983-12-01	8.3	6.08333	2.21667
1984-01-01	8	6.08	1.92
1984-02-01	7.8	6.07667	1.72333
1984-03-01	7.8	6.07333	1.72667
1984-04-01	7.7	6.07	1.63
1984-05-01	7.4	6.06667	1.33333
1984-06-01	7.2	6.06333	1.13667
1984-07-01	7.5	6.06	1.44
1984-08-01	7.5	6.05667	1.44333
1984-09-01	7.3	6.05333	1.24667
1984-10-01	7.4	6.05	1.35
1984-11-01	7.2	6.04667	1.15333
1984-12-01	7.3	6.04333	1.25667
1985-01-01	7.3	6.04	1.26
1985-02-01	7.2	6.03667	1.16333
1985-03-01	7.2	6.03333	1.16667
1985-04-01	7.3	6.03	1.27
1985-05-01	7.2	6.02667	1.17333
1985-06-01	7.4	6.02333	1.37667
1985-07-01	7.4	6.02	1.38
1985-08-01	7.1	6.01667	1.08333
1985-09-01	7.1	6.01333	1.08667
1985-10-01	7.1	6.01	1.09
1985-11-01	7	6.00667	0.993333
1985-12-01	7	6.00333	0.996667
1986-01-01	6.7	6	0.7
1986-02-01	7.2	5.99667	1.20333
1986-03-01	7.2	5.99333	1.20667
1986-04-01	7.1	5.99	1.11
1986-05-01	7.2	5.98333	1.21667
1986-06-01	7.2	5.97667	1.22333
1986-07-01	7	5.97	1.03
1986-08-01	6.9	5.96667	0.933333
1986-09-01	7	5.96333	1.03667
1986-10-01	7	5.96	1.04
1986-11-01	6.9	5.95667	0.943333
1986-12-01	6.6	5.95333	0.646667
1987-01-01	6.6	5.95	0.65
1987-02-01	6.6	5.94333	0.656667
1987-03-01	6.6	5.93667	0.663333
1987-04-01	6.3	5.93	0.37
1987-05-01	6.3	5.92667	0.373333
1987-06-01	6.2	5.92333	0.276667
1987-07-01	6.1	5.92	0.18
1987-08-01	6	5.91333	0.0866667
1987-09-01	5.9	5.90667	-0.00666667
1987-10-01	6	5.9	0.1
1987-11-01	5.8	5.89667	-0.0966667
1987-12-01	5.7	5.89333	-0.193333
1988-01-01	5.7	5.89	-0.19
1988-02-01	5.7	5.88333	-0.183333
1988-03-01	5.7	5.87667	-0.176667
1988-04-01	5.4	5.87	-0.47
1988-05-01	5.6	5.86333	-0.263333
1988-06-01	5.4	5.85667	-0.456667
1988-07-01	5.4	5.85	-0.45
1988-08-01	5.6	5.84333	-0.243333
1988-09-01	5.4	5.83667	-0.436667
1988-10-01	5.4	5.83	-0.43
1988-11-01	5.3	5.82333	-0.523333
1988-12-01	5.3	5.81667	-0.516667
1989-01-01	5.4	5.81	-0.41
1989-02-01	5.2	5.80333	-0.603333
1989-03-01	5	5.79667	-0.796667
1989-04-01	5.2	5.79	-0.59
1989-05-01	5.2	5.78333	-0.583333
1989-06-01	5.3	5.77667	-0.476667
1989-07-01	5.2	5.77	-0.57
1989-08-01	5.2	5.76333	-0.563333
1989-09-01	5.3	5.75667	-0.456667
1989-10-01	5.3	5.75	-0.45
1989-11-01	5.4	5.74333	-0.343333
1989-12-01	5.4	5.73667	-0.336667
1990-01-01	5.4	5.73	-0.33
1990-02-01	5.3	5.72333	-0.423333
1990-03-01	5.2	5.71667	-0.516667
1990-04-01	5.4	5.71	-0.31
1990-05-01	5.4	5.70333	-0.303333
1990-06-01	5.2	5.69667	-0.496667
1990-07-01	5.5	5.69	-0.19
1990-08-01	5.7	5.68333	0.0166667
1990-09-01	5.9	5.67667	0.223333
1990-10-01	5.9	5.67	0.23
1990-11-01	6.2	5.66667	0.533333
1990-12-01	6.3	5.66333	0.636667
1991-01-01	6.4	5.66	0.74
1991-02-01	6.6	5.65333	0.946667
1991-03-01	6.8	5.64667	1.15333
1991-04-01	6.7	5.64	1.06
1991-05-01	6.9	5.63333	1.26667
1991-06-01	6.9	5.62667	1.27333
1991-07-01	6.8	5.62	1.18
1991-08-01	6.9	5.61333	1.28667
1991-09-01	6.9	5.60667	1.29333
1991-10-01	7	5.6	1.4
1991-11-01	7	5.59667	1.40333
1991-12-01	7.3	5.59333	1.70667
1992-01-01	7.3	5.59	1.71
1992-02-01	7.4	5.58333	1.81667
1992-03-01	7.4	5.57667	1.82333
1992-04-01	7.4	5.57	1.83
1992-05-01	7.6	5.56333	2.03667
1992-06-01	7.8	5.55667	2.24333
1992-07-01	7.7	5.55	2.15
1992-08-01	7.6	5.54667	2.05333
1992-09-01	7.6	5.54333	2.05667
1992-10-01	7.3	5.54	1.76
1992-11-01	7.4	5.53333	1.86667
1992-12-01	7.4	5.52667	1.87333
1993-01-01	7.3	5.52	1.78
1993-02-01	7.1	5.51667	1.58333
1993-03-01	7	5.51333	1.48667
1993-04-01	7.1	5.51	1.59
1993-05-01	7.1	5.50333	1.59667
1993-06-01	7	5.49667	1.50333
1993-07-01	6.9	5.49	1.41
1993-08-01	6.8	5.48667	1.31333
1993-09-01	6.7	5.48333	1.21667
1993-10-01	6.8	5.48	1.32
1993-11-01	6.6	5.47667	1.12333
1993-12-01	6.5	5.47333	1.02667
1994-01-01	6.6	5.47	1.13
1994-02-01	6.6	5.46333	1.13667
1994-03-01	6.5	5.45667	1.04333
1994-04-01	6.4	5.45	0.95
1994-05-01	6.1	5.44667	0.653333
1994-06-01	6.1	5.44333	0.656667
1994-07-01	6.1	5.44	0.66
1994-08-01	6	5.43667	0.563333
1994-09-01	5.9	5.43333	0.466667
1994-10-01	5.8	5.43	0.37
1994-11-01	5.6	5.42667	0.173333
1994-12-01	5.5	5.42333	0.0766667
1995-01-01	5.6	5.42	0.18
1995-02-01	5.4	5.41667	-0.0166667
1995-03-01	5.4	5.41333	-0.0133333
1995-04-01	5.8	5.41	0.39
1995-05-01	5.6	5.40667	0.193333
1995-06-01	5.6	5.40333	0.196667
1995-07-01	5.7	5.4	0.3
1995-08-01	5.7	5.39667	0.303333
1995-09-01	5.6	5.39333	0.206667
1995-10-01	5.5	5.39	0.11
1995-11-01	5.6	5.38667	0.213333
1995-12-01	5.6	5.38333	0.216667
1996-01-01	5.6	5.38	0.22
1996-02-01	5.5	5.37667	0.123333
1996-03-01	5.5	5.37333	0.126667
1996-04-01	5.6	5.37	0.23
1996-05-01	5.6	5.36667	0.233333
1996-06-01	5.3	5.36333	-0.0633333
1996-07-01	5.5	5.36	0.14
1996-08-01	5.1	5.35667	-0.256667
1996-09-01	5.2	5.35333	-0.153333
1996-10-01	5.2	5.35	-0.15
1996-11-01	5.4	5.34667	0.0533333
1996-12-01	5.4	5.34333	0.0566667
1997-01-01	5.3	5.34	-0.04
1997-02-01	5.2	5.33667	-0.136667
1997-03-01	5.2	5.33333	-0.133333
1997-04-01	5.1	5.33	-0.23
1997-05-01	4.9	5.32667	-0.426667
1997-06-01	5	5.32333	-0.323333
1997-07-01	4.9	5.32	-0.42
1997-08-01	4.8	5.31667	-0.516667
1997-09-01	4.9	5.31333	-0.413333
1997-10-01	4.7	5.31	-0.61
1997-11-01	4.6	5.30667	-0.706667
1997-12-01	4.7	5.30333	-0.603333
1998-01-01	4.6	5.3	-0.7
1998-02-01	4.6	5.29667	-0.696667
1998-03-01	4.7	5.29333	-0.593333
1998-04-01	4.3	5.29	-0.99
1998-05-01	4.4	5.29	-0.89
1998-06-01	4.5	5.29	-0.79
1998-07-01	4.5	5.29	-0.79
1998-08-01	4.5	5.28667	-0.786667
1998-09-01	4.6	5.28333	-0.683333
1998-10-01	4.5	5.28	-0.78
1998-11-01	4.4	5.27667	-0.876667
1998-12-01	4.4	5.27333	-0.873333
1999-01-01	4.3	5.27	-0.97
1999-02-01	4.4	5.26667	-0.866667
1999-03-01	4.2	5.26333	-1.06333
1999-04-01	4.3	5.26	-0.96
1999-05-01	4.2	5.25667	-1.05667
1999-06-01	4.3	5.25333	-0.953333
1999-07-01	4.3	5.25	-0.95
1999-08-01	4.2	5.24667	-1.04667
1999-09-01	4.2	5.24333	-1.04333
1999-10-01	4.1	5.24	-1.14
1999-11-01	4.1	5.23333	-1.13333
1999-12-01	4	5.22667	-1.22667
2000-01-01	4	5.22	-1.22
2000-02-01	4.1	5.21667	-1.11667
2000-03-01	4	5.21333	-1.21333
2000-04-01	3.8	5.21	-1.41
2000-05-01	4	5.20667	-1.20667
2000-06-01	4	5.20333	-1.20333
2000-07-01	4	5.2	-1.2
2000-08-01	4.1	5.19667	-1.09667
2000-09-01	3.9	5.19333	-1.29333
2000-10-01	3.9	5.19	-1.29
2000-11-01	3.9	5.18667	-1.28667
2000-12-01	3.9	5.18333	-1.28333
2001-01-01	4.2	5.18	-0.98
2001-02-01	4.2	5.17667	-0.976667
2001-03-01	4.3	5.17333	-0.873333
2001-04-01	4.4	5.17	-0.77
2001-05-01	4.3	5.16667	-0.866667
2001-06-01	4.5	5.16333	-0.663333
2001-07-01	4.6	5.16	-0.56
2001-08-01	4.9	5.15667	-0.256667
2001-09-01	5	5.15333	-0.153333
2001-10-01	5.3	5.15	0.15
2001-11-01	5.5	5.14667	0.353333
2001-12-01	5.7	5.14333	0.556667
2002-01-01	5.7	5.14	0.56
2002-02-01	5.7	5.13667	0.563333
2002-03-01	5.7	5.13333	0.566667
2002-04-01	5.9	5.13	0.77
2002-05-01	5.8	5.12667	0.673333
2002-06-01	5.8	5.12333	0.676667
2002-07-01	5.8	5.12	0.68
2002-08-01	5.7	5.11667	0.583333
2002-09-01	5.7	5.11333	0.586667
2002-10-01	5.7	5.11	0.59
2002-11-01	5.9	5.10667	0.793333
2002-12-01	6	5.10333	0.896667
2003-01-01	5.8	5.1	0.7
2003-02-01	5.9	5.09667	0.803333
2003-03-01	5.9	5.09333	0.806667
2003-04-01	6	5.09	0.91
2003-05-01	6.1	5.08667	1.01333
2003-06-01	6.3	5.08333	1.21667
2003-07-01	6.2	5.08	1.12
2003-08-01	6.1	5.07667	1.02333
2003-09-01	6.1	5.07333	1.02667
2003-10-01	6	5.07	0.93
2003-11-01	5.8	5.06667	0.733333
2003-12-01	5.7	5.06333	0.636667
2004-01-01	5.7	5.06	0.64
2004-02-01	5.6	5.05667	0.543333
2004-03-01	5.8	5.05333	0.746667
2004-04-01	5.6	5.05	0.55
2004-05-01	5.6	5.04667	0.553333
2004-06-01	5.6	5.04333	0.556667
2004-07-01	5.5	5.04	0.46
2004-08-01	5.4	5.03667	0.363333
2004-09-01	5.4	5.03333	0.366667
2004-10-01	5.5	5.03	0.47
2004-11-01	5.4	5.02667	0.373333
2004-12-01	5.4	5.02333	0.376667
2005-01-01	5.3	5.02	0.28
2005-02-01	5.4	5.01667	0.383333
2005-03-01	5.2	5.01333	0.186667
2005-04-01	5.2	5.01	0.19
2005-05-01	5.1	5.00667	0.0933333
2005-06-01	5	5.00333	-0.00333333
2005-07-01	5	5	0
2005-08-01	4.9	5	-0.1
2005-09-01	5	5	0
2005-10-01	5	5	0
2005-11-01	5	4.99667	0.00333333
2005-12-01	4.9	4.99333	-0.0933333
2006-01-01	4.7	4.99	-0.29
2006-02-01	4.8	4.99	-0.19
2006-03-01	4.7	4.99	-0.29
2006-04-01	4.7	4.99	-0.29
2006-05-01	4.6	4.98667	-0.386667
2006-06-01	4.6	4.98333	-0.383333
2006-07-01	4.7	4.98	-0.28
2006-08-01	4.7	4.97667	-0.276667
2006-09-01	4.5	4.97333	-0.473333
2006-10-01	4.4	4.97	-0.57
2006-11-01	4.5	4.96333	-0.463333
2006-12-01	4.4	4.95667	-0.556667
2007-01-01	4.6	4.95	-0.35
2007-02-01	4.5	4.94333	-0.443333
2007-03-01	4.4	4.93667	-0.536667
2007-04-01	4.5	4.93	-0.43
2007-05-01	4.4	4.92667	-0.526667
2007-06-01	4.6	4.92333	-0.323333
2007-07-01	4.7	4.92	-0.22
2007-08-01	4.6	4.91333	-0.313333
2007-09-01	4.7	4.90667	-0.206667
2007-10-01	4.7	4.9	-0.2
2007-11-01	4.7	4.89667	-0.196667
2007-12-01	5	4.89333	0.106667
2008-01-01	5	4.89	0.11
2008-02-01	4.9	4.90667	-0.00666667
2008-03-01	5.1	4.92333	0.176667
2008-04-01	5	4.94	0.06
2008-05-01	5.4	4.94667	0.453333
2008-06-01	5.6	4.95333	0.646667
2008-07-01	5.8	4.96	0.84
2008-08-01	6.1	4.99667	1.10333
2008-09-01	6.1	5.03333	1.06667
2008-10-01	6.5	5.07	1.43
2008-11-01	6.8	5.10667	1.69333
2008-12-01	7.3	5.14333	2.15667
2009-01-01	7.8	5.18	2.62
2009-02-01	8.3	5.20333	3.09667
2009-03-01	8.7	5.22667	3.47333
2009-04-01	9	5.25	3.75
2009-05-01	9.4	5.28667	4.11333
2009-06-01	9.5	5.32333	4.17667
2009-07-01	9.5	5.36	4.14
2009-08-01	9.6	5.4	4.2
2009-09-01	9.8	5.44	4.36
2009-10-01	10	5.48	4.52
2009-11-01	9.9	5.52667	4.37333
2009-12-01	9.9	5.57333	4.32667
2010-01-01	9.8	5.62	4.18
2010-02-01	9.8	5.63333	4.16667
2010-03-01	9.9	5.64667	4.25333
2010-04-01	9.9	5.66	4.24
2010-05-01	9.6	5.67	3.93
2010-06-01	9.4	5.68	3.72
2010-07-01	9.4	5.69	3.71
2010-08-01	9.5	5.70333	3.79667
2010-09-01	9.5	5.71667	3.78333
2010-10-01	9.4	5.73	3.67
2010-11-01	9.8	5.74	4.06
2010-12-01	9.3	5.75	3.55
2011-01-01	9.1	5.76	3.34
2011-02-01	9	5.76667	3.23333
2011-03-01	9	5.77333	3.22667
2011-04-01	9.1	5.78	3.32
2011-05-01	9	5.78333	3.21667
2011-06-01	9.1	5.78667	3.31333
2011-07-01	9	5.79	3.21
2011-08-01	9	5.79333	3.20667
2011-09-01	9	5.79667	3.20333
2011-10-01	8.8	5.8	3
2011-11-01	8.6	5.79	2.81
2011-12-01	8.5	5.78	2.72
2012-01-01	8.3	5.77	2.53
2012-02-01	8.3	5.75667	2.54333
2012-03-01	8.2	5.74333	2.45667
2012-04-01	8.2	5.73	2.47
2012-05-01	8.2	5.70667	2.49333
2012-06-01	8.2	5.68333	2.51667
2012-07-01	8.2	5.66	2.54
2012-08-01	8.1	5.64	2.46
2012-09-01	7.8	5.62	2.18
2012-10-01	7.8	5.6	2.2
2012-11-01	7.7	5.55333	2.14667
2012-12-01	7.9	5.50667	2.39333
2013-01-01	8	5.46	2.54
2013-02-01	7.7	5.41	2.29
2013-03-01	7.5	5.36	2.14
2013-04-01	7.6	5.31	2.29
2013-05-01	7.5	5.27333	2.22667
2013-06-01	7.5	5.23667	2.26333
2013-07-01	7.3	5.2	2.1
2013-08-01	7.2	5.16333	2.03667
2013-09-01	7.2	5.12667	2.07333
2013-10-01	7.2	5.09	2.11
2013-11-01	6.9	5.05333	1.84667
2013-12-01	6.7	5.01667	1.68333
2014-01-01	6.6	4.98	1.62
2014-02-01	6.7	4.95	1.75
2014-03-01	6.7	4.92	1.78
2014-04-01	6.2	4.89	1.31
2014-05-01	6.3	4.86667	1.43333
2014-06-01	6.1	4.84333	1.25667
2014-07-01	6.2	4.82	1.38
2014-08-01	6.1	4.8	1.3
2014-09-01	5.9	4.78	1.12
2014-10-01	5.7	4.76	0.94
2014-11-01	5.8	4.74667	1.05333
2014-12-01	5.6	4.73333	0.866667
2015-01-01	5.7	4.72	0.98
2015-02-01	5.5	4.71	0.79
2015-03-01	5.4	4.7	0.7
2015-04-01	5.4	4.69	0.71
2015-05-01	5.6	4.68	0.92
2015-06-01	5.3	4.67	0.63
2015-07-01	5.2	4.66	0.54
2015-08-01	5.1	4.65333	0.446667
2015-09-01	5	4.64667	0.353333
2015-10-01	5	4.64	0.36
2015-11-01	5.1	4.63667	0.463333
2015-12-01	5	4.63333	0.366667
2016-01-01	4.9	4.63	0.27
2016-02-01	4.9	4.62667	0.273333
2016-03-01	5	4.62333	0.376667
2016-04-01	5	4.62	0.38
2016-05-01	4.8	4.62	0.18
2016-06-01	4.9	4.62	0.28
2016-07-01	4.8	4.62	0.18
2016-08-01	4.9	4.62	0.28
2016-09-01	5	4.62	0.38
2016-10-01	4.9	4.62	0.28
2016-11-01	4.7	4.62	0.08
2016-12-01	4.7	4.62	0.08
2017-01-01	4.7	4.62	0.08
2017-02-01	4.7	4.62333	0.0766667
2017-03-01	4.4	4.62667	-0.226667
2017-04-01	4.4	4.63	-0.23
2017-05-01	4.4	4.62667	-0.226667
2017-06-01	4.3	4.62333	-0.323333
2017-07-01	4.3	4.62	-0.32
2017-08-01	4.4	4.62	-0.22
2017-09-01	4.2	4.62	-0.42
2017-10-01	4.1	4.62	-0.52
2017-11-01	4.2	4.62	-0.42
2017-12-01	4.1	4.62	-0.52
2018-01-01	4.1	4.62	-0.52
2018-02-01	4.1	4.62	-0.52
2018-03-01	4	4.62	-0.62
2018-04-01	3.9	4.62	-0.72
2018-05-01	3.8	4.62	-0.82
2018-06-01	4	4.62	-0.62
2018-07-01	3.9	4.62	-0.72
2018-08-01	3.8	4.61667	-0.816667
2018-09-01	3.7	4.61333	-0.913333
2018-10-01	3.8	4.61	-0.81
2018-11-01	3.7	4.61	-0.91
2018-12-01	3.9	4.61	-0.71
