# Supplementary material for: Optimal Macroeconomic Policy in Nonlinear Models: A VSTAR Perspective
Source: publisher site journal article supplement (doi:10.1515/snde-2024-0100), 2025-10-08
Supplement: Supplementary file 15 [file US-Monthly-GDP-History (5).xlsx]

## Sheet: Commentary
													Monthly GDP Index
2018-11-28						WWW.IHSMARKIT.COM/US-ECON							314-721-4747
	Oct.17	Nov.17	Dec.17	Jan.18	Feb.18	Mar.18	Apr.18	May.18	Jun.18	Jul.18	Aug.18	Sep.18	Oct.18
Monthly GDP (SAAR)	18145	18252.8	18273.5	18303.5	18332.3	18336.2	18439.9	18547.8	18547.8	18678.9	18659.5	18676.8	18739.7
% change		0.593825	0.113737	0.163743	0.157407	0.0214027	0.565796	0.584654	-3.55887e-05	0.706901	-0.103696	0.0928898	0.336481
% change, ann. rate		7.3633	1.37341	1.9827	1.90532	0.257134	7.00487	7.2459	-0.000427064	8.82052	-1.23728	1.12039	4.11334
Contributions to Annualized % change						Monthly GDP Index:			October 2018
		Aug.18	Sep.18	Oct.18
Monthly GDP		-1.23728	1.12039	4.11334
Final Sales		1.04184	2.82339	1.39612
Domestic		3.39859	3.06813	1.29815
PCE		2.32377	1.89262	1.56786
Nonres Fixed Inv		1.10047	2.55698	-1.74672
Res Fixed Inv		-0.138345	-0.281503	-0.302875
Covered Gov C&GI		0.672107	0.0975463	-0.279208
Not Covered		-0.559402	-1.19751	2.0591
Net Exports		-2.35676	-0.244742	0.0979701		Recent Historical Data
Nonfarm CIPI		-2.285	-1.70839	2.64688
Contributions to Annualized % change
						Forecast Assumptions
Technical Note

## Sheet: Data
	Monthly Nominal GDP Index	Monthly Real GDP Index
1992 - Jan	6315.83	9480.19
1992 - Feb	6356.43	9521.52
1992 - Mar	6417.05	9600.16
1992 - Apr	6443.28	9606.44
1992 - May	6433.98	9588.59
1992 - Jun	6535.03	9716.94
1992 - Jul	6557.53	9734.39
1992 - Aug	6556.62	9714.61
1992 - Sep	6585.77	9748.74
1992 - Oct	6637.31	9803.48
1992 - Nov	6680.25	9831.31
1992 - Dec	6724.85	9867.41
1993 - Jan	6717.71	9852.33
1993 - Feb	6741.54	9867.88
1993 - Mar	6729.13	9831.37
1993 - Apr	6768.32	9869.96
1993 - May	6824.2	9928.34
1993 - Jun	6834.3	9925.34
1993 - Jul	6832.98	9903.69
1993 - Aug	6873.97	9942.93
1993 - Sep	6939.34	10018.9
1993 - Oct	6944.72	10016.7
1993 - Nov	7036.01	10114.6
1993 - Dec	7060.49	10140.5
1994 - Jan	7074.47	10139.7
1994 - Feb	7122.96	10196.1
1994 - Mar	7149.53	10229.7
1994 - Apr	7186.28	10264.2
1994 - May	7290.27	10363.1
1994 - Jun	7264.24	10352.3
1994 - Jul	7299.04	10355
1994 - Aug	7351.72	10425.6
1994 - Sep	7342.47	10380.2
1994 - Oct	7429.13	10475.3
1994 - Nov	7431.81	10469.2
1994 - Dec	7504.92	10573.7
1995 - Jan	7542.18	10576.3
1995 - Feb	7488.28	10499.8
1995 - Mar	7536.4	10554.2
1995 - Apr	7538.96	10521.8
1995 - May	7560.86	10551.3
1995 - Jun	7643.17	10652
1995 - Jul	7630.48	10599.2
1995 - Aug	7674.12	10657.4
1995 - Sep	7744.77	10738.5
1995 - Oct	7747.38	10692.3
1995 - Nov	7747.69	10710.7
1995 - Dec	7822.68	10809.9
1996 - Jan	7840.44	10787.9
1996 - Feb	7852.86	10804.5
1996 - Mar	7912.11	10862.5
1996 - Apr	8025.06	11006.1
1996 - May	8009.41	10970.1
1996 - Jun	8064.05	11019.9
1996 - Jul	8099.34	11060.7
1996 - Aug	8122.94	11092.9
1996 - Sep	8171.95	11138
1996 - Oct	8251.07	11212.6
1996 - Nov	8281.77	11234.2
1996 - Dec	8246.48	11190.4
1997 - Jan	8309.34	11256.9
1997 - Feb	8385.54	11336.2
1997 - Mar	8393.08	11261.3
1997 - Apr	8512.11	11512.1
1997 - May	8476.29	11402.1
1997 - Jun	8568.07	11502.7
1997 - Jul	8620.8	11595.6
1997 - Aug	8655.76	11625.4
1997 - Sep	8711.91	11626.4
1997 - Oct	8747.99	11701.3
1997 - Nov	8736.43	11677.1
1997 - Dec	8813.29	11768.2
1998 - Jan	8772.59	11706.1
1998 - Feb	8894.38	11878.9
1998 - Mar	8932.48	11913
1998 - Apr	8925.74	11887.8
1998 - May	8952.66	11917.4
1998 - Jun	9030.69	12021.1
1998 - Jul	9050.71	11996.7
1998 - Aug	9100.03	12057.5
1998 - Sep	9212.55	12220.6
1998 - Oct	9265.45	12261.7
1998 - Nov	9307.06	12312.7
1998 - Dec	9309.47	12286.5
1999 - Jan	9361.74	12319.1
1999 - Feb	9417.41	12412.3
1999 - Mar	9472.65	12478.5
1999 - Apr	9495.08	12470.2
1999 - May	9534.1	12512.7
1999 - Jun	9543.28	12513.3
1999 - Jul	9654.43	12622.6
1999 - Aug	9655.39	12658.7
1999 - Sep	9735.74	12705.9
1999 - Oct	9817.27	12776.2
1999 - Nov	9888.62	12860.8
1999 - Dec	9992.25	12995.5
2000 - Jan	9925.78	12864.7
2000 - Feb	9995.7	12916.9
2000 - Mar	10087.1	12990.8
2000 - Apr	10224.2	13159.7
2000 - May	10231.7	13143.1
2000 - Jun	10287.1	13179.4
2000 - Jul	10236.9	13097
2000 - Aug	10341.9	13207.9
2000 - Sep	10380.7	13229.9
2000 - Oct	10440.8	13278.3
2000 - Nov	10448.6	13262.2
2000 - Dec	10427.6	13241.2
2001 - Jan	10471.5	13251.6
2001 - Feb	10465.9	13224.1
2001 - Mar	10481.2	13192.9
2001 - Apr	10562.9	13289.2
2001 - May	10639.6	13351.9
2001 - Jun	10591	13259.6
2001 - Jul	10582.3	13214.5
2001 - Aug	10693.3	13363.3
2001 - Sep	10513.3	13157.2
2001 - Oct	10641.4	13264.4
2001 - Nov	10586.1	13190.2
2001 - Dec	10753.3	13388.9
2002 - Jan	10787	13425.9
2002 - Feb	10754.8	13348
2002 - Mar	10825.1	13418.1
2002 - Apr	10867.2	13466.4
2002 - May	10873.4	13456.8
2002 - Jun	10939	13512.3
2002 - Jul	11007.3	13584.7
2002 - Aug	10961.9	13512.3
2002 - Sep	11007	13518
2002 - Oct	11004.3	13500.1
2002 - Nov	11063.8	13544.5
2002 - Dec	11146.3	13633
2003 - Jan	11145.2	13605.7
2003 - Feb	11221.7	13679.4
2003 - Mar	11183.6	13618.5
2003 - Apr	11260	13686.3
2003 - May	11274.8	13699.5
2003 - Jun	11403.9	13870
2003 - Jul	11463.4	13901.6
2003 - Aug	11570.6	13986.2
2003 - Sep	11668	14068.7
2003 - Oct	11696.4	14079
2003 - Nov	11782.7	14161.1
2003 - Dec	11828.7	14198.1
2004 - Jan	11805.2	14113
2004 - Feb	11923.5	14233.9
2004 - Mar	12031.8	14317.6
2004 - Apr	12032.4	14274.9
2004 - May	12169.9	14403.4
2004 - Jun	12124.7	14311.4
2004 - Jul	12278.9	14436.8
2004 - Aug	12299.4	14473.5
2004 - Sep	12331.7	14485.9
2004 - Oct	12466	14584.8
2004 - Nov	12510.6	14595.5
2004 - Dec	12590.7	14650.6
2005 - Jan	12745.1	14781.8
2005 - Feb	12745.5	14755.1
2005 - Mar	12793.4	14779.2
2005 - Apr	12845.1	14809.6
2005 - May	12874	14783.2
2005 - Jun	13011	14927.7
2005 - Jul	13088.5	14952.1
2005 - Aug	13151.5	14995.6
2005 - Sep	13188.7	14969.6
2005 - Oct	13246.6	14992.2
2005 - Nov	13305.6	15020.5
2005 - Dec	13444.8	15188.1
2006 - Jan	13531.1	15244.4
2006 - Feb	13571.4	15216.4
2006 - Mar	13709.3	15341.2
2006 - Apr	13689.4	15258
2006 - May	13778.6	15334.2
2006 - Jun	13781.4	15316.9
2006 - Jul	13785.6	15262.9
2006 - Aug	13879.6	15323.1
2006 - Sep	13937.2	15394.2
2006 - Oct	13969	15397
2006 - Nov	14057.5	15499.8
2006 - Dec	14085.2	15475
2007 - Jan	14131.2	15462.3
2007 - Feb	14279	15560.2
2007 - Mar	14215.5	15458.5
2007 - Apr	14342.6	15578.6
2007 - May	14380.5	15573.9
2007 - Jun	14424	15594.6
2007 - Jul	14393.8	15531.4
2007 - Aug	14571.2	15716.7
2007 - Sep	14640	15752.9
2007 - Oct	14630.7	15727.2
2007 - Nov	14687.8	15761.5
2007 - Dec	14726	15798
2008 - Jan	14754.2	15821.3
2008 - Feb	14569	15587
2008 - Mar	14629.9	15606.7
2008 - Apr	14698.8	15656
2008 - May	14743.9	15695.4
2008 - Jun	14974.2	15905.6
2008 - Jul	14904.6	15769.9
2008 - Aug	14858.4	15706.3
2008 - Sep	14742.6	15525.4
2008 - Oct	14637	15401.5
2008 - Nov	14653.2	15425.9
2008 - Dec	14388.5	15157.1
2009 - Jan	14444.4	15202.5
2009 - Feb	14402.4	15144.1
2009 - Mar	14336.8	15121.7
2009 - Apr	14328.4	15118
2009 - May	14350.2	15138.6
2009 - Jun	14379.9	15146
2009 - Jul	14347.7	15125
2009 - Aug	14454	15220.7
2009 - Sep	14459.3	15222.4
2009 - Oct	14670.9	15428.9
2009 - Nov	14642.5	15362.9
2009 - Dec	14570.7	15276.8
2010 - Jan	14671.6	15365.3
2010 - Feb	14691.7	15394.4
2010 - Mar	14800.7	15485.9
2010 - Apr	14898.5	15552.5
2010 - May	14899.1	15521.6
2010 - Jun	14980.7	15598.1
2010 - Jul	15056.9	15673.6
2010 - Aug	15049.9	15639.3
2010 - Sep	15133	15703.3
2010 - Oct	15221.5	15753.3
2010 - Nov	15194.1	15701.6
2010 - Dec	15307	15797.2
2011 - Jan	15186.1	15651.6
2011 - Feb	15220.2	15638.7
2011 - Mar	15451.1	15848
2011 - Apr	15525.3	15892
2011 - May	15505.6	15818.6
2011 - Jun	15457.7	15764.9
2011 - Jul	15560.8	15815.6
2011 - Aug	15658.7	15884
2011 - Sep	15556	15762.8
2011 - Oct	15812.2	16037.3
2011 - Nov	15789.7	15987.4
2011 - Dec	15787.5	15988
2012 - Jan	15888.9	16032.8
2012 - Feb	16159.2	16261.3
2012 - Mar	16011.2	16094.1
2012 - Apr	16129.1	16181.6
2012 - May	16162.8	16216.1
2012 - Jun	16164.8	16198.6
2012 - Jul	16261.9	16266.2
2012 - Aug	16207.5	16172.1
2012 - Sep	16302.1	16223.7
2012 - Oct	16271.4	16156.3
2012 - Nov	16345.7	16234.6
2012 - Dec	16459.4	16326.6
2013 - Jan	16610.6	16451.3
2013 - Feb	16520.5	16317
2013 - Mar	16577.6	16380.8
2013 - Apr	16592.6	16393.4
2013 - May	16584.2	16353.5
2013 - Jun	16737	16462.8
2013 - Jul	16784.2	16489.3
2013 - Aug	16873.3	16556.7
2013 - Sep	16888.8	16549.3
2013 - Oct	16997.7	16624.3
2013 - Nov	17123.1	16703.3
2013 - Dec	17128.7	16663.6
2014 - Jan	17023.5	16562.3
2014 - Feb	17111.5	16640
2014 - Mar	17173.7	16663
2014 - Apr	17313.9	16763.1
2014 - May	17430.2	16823.5
2014 - Jun	17533.2	16904
2014 - Jul	17650.6	16977.5
2014 - Aug	17777.7	17087.9
2014 - Sep	17731.2	17035.6
2014 - Oct	17830.3	17113.4
2014 - Nov	17850.7	17121
2014 - Dec	17834.3	17107.8
2015 - Jan	17884.8	17214.8
2015 - Feb	18032.5	17325.2
2015 - Mar	17994	17224.5
2015 - Apr	18166.2	17391.4
2015 - May	18201.6	17365.5
2015 - Jun	18296	17434.4
2015 - Jul	18288.7	17397
2015 - Aug	18315.3	17421.7
2015 - Sep	18389.3	17497.9
2015 - Oct	18387.8	17486.3
2015 - Nov	18324.1	17423.6
2015 - Dec	18351.2	17458.9
2016 - Jan	18359.4	17479.7
2016 - Feb	18323.2	17453.5
2016 - Mar	18544.8	17637.1
2016 - Apr	18632.9	17655.2
2016 - May	18607.4	17586.7
2016 - Jun	18681.9	17625.7
2016 - Jul	18672.2	17597.7
2016 - Aug	18820.7	17736.7
2016 - Sep	18906	17785.6
2016 - Oct	18852.2	17688
2016 - Nov	19018.2	17829.4
2016 - Dec	19067.4	17835.2
2017 - Jan	19090.1	17798.5
2017 - Feb	19132.3	17831.2
2017 - Mar	19265.3	17959.5
2017 - Apr	19213.8	17872.8
2017 - May	19383.4	18024.1
2017 - Jun	19480.2	18088.6
2017 - Jul	19477.3	18073.5
2017 - Aug	19594.2	18128.9
2017 - Sep	19692.6	18160.2
2017 - Oct	19712.5	18145
2017 - Nov	19866.7	18252.8
2017 - Dec	19916.3	18273.5
2018 - Jan	19988.9	18303.5
2018 - Feb	20051.7	18332.3
2018 - Mar	20082.5	18336.2
2018 - Apr	20279.4	18439.9
2018 - May	20457.5	18547.8
2018 - Jun	20499.1	18547.8
2018 - Jul	20636.6	18678.9
2018 - Aug	20638.5	18659.5
2018 - Sep	20677.8	18676.8
2018 - Oct	20777.4	18739.7
