# Supplementary material for: Optimal Macroeconomic Policy in Nonlinear Models: A VSTAR Perspective
Source: publisher site journal article supplement (doi:10.1515/snde-2024-0100), 2025-10-08
Supplement: Supplementary file 16 [file WALCL.xls]

## Sheet: FRED Graph
FRED Graph Observations
Federal Reserve Economic Data
Link: https://fred.stlouisfed.org
Help: https://fred.stlouisfed.org/help-faq
Economic Research Division
Federal Reserve Bank of St. Louis
WALCL	All Federal Reserve Banks: Total Assets, Millions of Dollars, Monthly, Not Seasonally Adjusted
Frequency: Monthly
observation_date	WALCL
2003-01-01	712809
2003-02-01	721980
2003-03-01	725019
2003-04-01	746294
2003-05-01	744896
2003-06-01	744018
2003-07-01	740295
2003-08-01	740637
2003-09-01	741193
2003-10-01	747272
2003-11-01	756964
2003-12-01	771551
2004-01-01	755279
2004-02-01	750666
2004-03-01	760725
2004-04-01	772927
2004-05-01	771108
2004-06-01	779578
2004-07-01	773916
2004-08-01	775437
2004-09-01	786330
2004-10-01	791336
2004-11-01	809956
2004-12-01	810944
2005-01-01	807262
2005-02-01	804576
2005-03-01	807551
2005-04-01	809797
2005-05-01	810160
2005-06-01	810082
2005-07-01	814259
2005-08-01	823237
2005-09-01	823771
2005-10-01	819105
2005-11-01	835059
2005-12-01	847700
2006-01-01	828901
2006-02-01	840555
2006-03-01	833675
2006-04-01	844572
2006-05-01	851580
2006-06-01	844436
2006-07-01	841552
2006-08-01	850925
2006-09-01	849971
2006-10-01	852648
2006-11-01	856671
2006-12-01	869988
2007-01-01	865730
2007-02-01	877409
2007-03-01	869803
2007-04-01	879686
2007-05-01	876986
2007-06-01	865105
2007-07-01	863890
2007-08-01	872873
2007-09-01	889900
2007-10-01	883385
2007-11-01	879417
2007-12-01	890662
2008-01-01	900264
2008-02-01	893825
2008-03-01	893965
2008-04-01	888131
2008-05-01	904054
2008-06-01	892713
2008-07-01	918625
2008-08-01	909982
2008-09-01	1211825
2008-10-01	1969086
2008-11-01	2106117
2008-12-01	2239457
2009-01-01	1927082
2009-02-01	1916115
2009-03-01	2071556
2009-04-01	2066712
2009-05-01	2080115
2009-06-01	2025571
2009-07-01	2000547
2009-08-01	2074902
2009-09-01	2141020
2009-10-01	2161537
2009-11-01	2206359
2009-12-01	2234067
2010-01-01	2246886
2010-02-01	2286127
2010-03-01	2307150
2010-04-01	2330472
2010-05-01	2334041
2010-06-01	2330851
2010-07-01	2325298
2010-08-01	2301015
2010-09-01	2298691
2010-10-01	2295392
2010-11-01	2346001
2010-12-01	2420570
2011-01-01	2443527
2011-02-01	2533221
2011-03-01	2622523
2011-04-01	2690985
2011-05-01	2774996
2011-06-01	2865251
2011-07-01	2863576
2011-08-01	2853888
2011-09-01	2850921
2011-10-01	2845685
2011-11-01	2814235
2011-12-01	2926095
2012-01-01	2919545
2012-02-01	2925722
2012-03-01	2878137
2012-04-01	2866561
2012-05-01	2842654
2012-06-01	2863547
2012-07-01	2846757
2012-08-01	2812806
2012-09-01	2804457
2012-10-01	2823137
2012-11-01	2851362
2012-12-01	2907300
2013-01-01	3008704
2013-02-01	3090600
2013-03-01	3202256
2013-04-01	3318649
2013-05-01	3385128
2013-06-01	3478672
2013-07-01	3571797
2013-08-01	3644456
2013-09-01	3734018
2013-10-01	3843396
2013-11-01	3925876
2013-12-01	4032575
2014-01-01	4102138
2014-02-01	4159972
2014-03-01	4226971
2014-04-01	4296049
2014-05-01	4322654
2014-06-01	4368348
2014-07-01	4406637
2014-08-01	4413736
2014-09-01	4459050
2014-10-01	4486754
2014-11-01	4485931
2014-12-01	4497660
2015-01-01	4500064
2015-02-01	4486725
2015-03-01	4480603
2015-04-01	4471499
2015-05-01	4463981
2015-06-01	4495055
2015-07-01	4485480
2015-08-01	4475105
2015-09-01	4484111
2015-10-01	4489339
2015-11-01	4477088
2015-12-01	4486587
2016-01-01	4482349
2016-02-01	4489796
2016-03-01	4482840
2016-04-01	4474665
2016-05-01	4461111
2016-06-01	4466482
2016-07-01	4464498
2016-08-01	4457907
2016-09-01	4452002
2016-10-01	4454326
2016-11-01	4446307
2016-12-01	4451451
2017-01-01	4452838
2017-02-01	4468702
2017-03-01	4469618
2017-04-01	4470142
2017-05-01	4459914
2017-06-01	4463347
2017-07-01	4465284
2017-08-01	4452360
2017-09-01	4455661
2017-10-01	4461117
2017-11-01	4438592
2017-12-01	4448680
2018-01-01	4419225
2018-02-01	4393401
2018-03-01	4392198
2018-04-01	4372886
2018-05-01	4327519
2018-06-01	4305491
2018-07-01	4277681
2018-08-01	4218914
2018-09-01	4192909
2018-10-01	4139731
2018-11-01	4097170
2018-12-01	4075636
2019-01-01	4047052
