# Supplementary material for: Optimal Macroeconomic Policy in Nonlinear Models: A VSTAR Perspective
Source: publisher site journal article supplement (doi:10.1515/snde-2024-0100), 2025-10-08
Supplement: Supplementary file 17 [file WSHOMCB.xls]

## Sheet: FRED Graph
FRED Graph Observations
Federal Reserve Economic Data
Link: https://fred.stlouisfed.org
Help: https://fred.stlouisfed.org/help-faq
Economic Research Division
Federal Reserve Bank of St. Louis
WSHOMCB	Assets: Securities Held Outright: Mortgage-Backed Securities, Millions of Dollars, Monthly, Not Seasonally Adjusted
Frequency: Monthly
observation_date	WSHOMCB
2003-01-01	0
2003-02-01	0
2003-03-01	0
2003-04-01	0
2003-05-01	0
2003-06-01	0
2003-07-01	0
2003-08-01	0
2003-09-01	0
2003-10-01	0
2003-11-01	0
2003-12-01	0
2004-01-01	0
2004-02-01	0
2004-03-01	0
2004-04-01	0
2004-05-01	0
2004-06-01	0
2004-07-01	0
2004-08-01	0
2004-09-01	0
2004-10-01	0
2004-11-01	0
2004-12-01	0
2005-01-01	0
2005-02-01	0
2005-03-01	0
2005-04-01	0
2005-05-01	0
2005-06-01	0
2005-07-01	0
2005-08-01	0
2005-09-01	0
2005-10-01	0
2005-11-01	0
2005-12-01	0
2006-01-01	0
2006-02-01	0
2006-03-01	0
2006-04-01	0
2006-05-01	0
2006-06-01	0
2006-07-01	0
2006-08-01	0
2006-09-01	0
2006-10-01	0
2006-11-01	0
2006-12-01	0
2007-01-01	0
2007-02-01	0
2007-03-01	0
2007-04-01	0
2007-05-01	0
2007-06-01	0
2007-07-01	0
2007-08-01	0
2007-09-01	0
2007-10-01	0
2007-11-01	0
2007-12-01	0
2008-01-01	0
2008-02-01	0
2008-03-01	0
2008-04-01	0
2008-05-01	0
2008-06-01	0
2008-07-01	0
2008-08-01	0
2008-09-01	0
2008-10-01	0
2008-11-01	0
2008-12-01	0
2009-01-01	7377
2009-02-01	68745
2009-03-01	236156
2009-04-01	366153
2009-05-01	427552
2009-06-01	467226
2009-07-01	542888
2009-08-01	622864
2009-09-01	692365
2009-10-01	774066
2009-11-01	852124
2009-12-01	908257
2010-01-01	969728
2010-02-01	1032560
2010-03-01	1068697
2010-04-01	1096416
2010-05-01	1112910
2010-06-01	1118127
2010-07-01	1117474
2010-08-01	1103167
2010-09-01	1078539
2010-10-01	1051037
2010-11-01	1037803
2010-12-01	992141
2011-01-01	965077
2011-02-01	958201
2011-03-01	937155
2011-04-01	927021
2011-05-01	917856
2011-06-01	908853
2011-07-01	897285
2011-08-01	884945
2011-09-01	870883
2011-10-01	849261
2011-11-01	827052
2011-12-01	837295
2012-01-01	835624
2012-02-01	840795
2012-03-01	836786
2012-04-01	847796
2012-05-01	851750
2012-06-01	854979
2012-07-01	853362
2012-08-01	843597
2012-09-01	834979
2012-10-01	852039
2012-11-01	883539
2012-12-01	926558
2013-01-01	965784
2013-02-01	1015914
2013-03-01	1070932
2013-04-01	1136007
2013-05-01	1164934
2013-06-01	1208116
2013-07-01	1246964
2013-08-01	1291341
2013-09-01	1342004
2013-10-01	1393687
2013-11-01	1439854
2013-12-01	1496943
2014-01-01	1532224
2014-02-01	1570067
2014-03-01	1603104
2014-04-01	1631875
2014-05-01	1647982
2014-06-01	1663897
2014-07-01	1674363
2014-08-01	1678312
2014-09-01	1706282
2014-10-01	1717888
2014-11-01	1729790
2014-12-01	1736832
2015-01-01	1738672
2015-02-01	1740208
2015-03-01	1731909
2015-04-01	1718850
2015-05-01	1722434
2015-06-01	1746393
2015-07-01	1734834
2015-08-01	1736612
2015-09-01	1741233
2015-10-01	1744091
2015-11-01	1744789
2015-12-01	1747467
2016-01-01	1744179
2016-02-01	1760918
2016-03-01	1753082
2016-04-01	1744826
2016-05-01	1743074
2016-06-01	1743541
2016-07-01	1741091
2016-08-01	1743982
2016-09-01	1736875
2016-10-01	1735841
2016-11-01	1740674
2016-12-01	1741387
2017-01-01	1744594
2017-02-01	1773621
2017-03-01	1769118
2017-04-01	1769013
2017-05-01	1770958
2017-06-01	1770280
2017-07-01	1768999
2017-08-01	1767553
2017-09-01	1768160
2017-10-01	1770563
2017-11-01	1767095
2017-12-01	1764926
2018-01-01	1760743
2018-02-01	1759972
2018-03-01	1754368
2018-04-01	1744967
2018-05-01	1734588
2018-06-01	1721271
2018-07-01	1709528
2018-08-01	1697006
2018-09-01	1681763
2018-10-01	1668989
2018-11-01	1653468
2018-12-01	1637123
2019-01-01	1628895
