# Supplementary material for: Optimal Macroeconomic Policy in Nonlinear Models: A VSTAR Perspective
Source: publisher site journal article supplement (doi:10.1515/snde-2024-0100), 2025-10-08
Supplement: Supplementary file 18 [file WSHOTSL.xls]

## Sheet: FRED Graph
FRED Graph Observations
Federal Reserve Economic Data
Link: https://fred.stlouisfed.org
Help: https://fred.stlouisfed.org/help-faq
Economic Research Division
Federal Reserve Bank of St. Louis
WSHOTSL	Factors Supplying Reserve Balances: Securities Held Outright: U.S. Treasury Securities, Millions of Dollars, Monthly, Not Seasonally Adjusted
Frequency: Monthly
observation_date	WSHOTSL
2003-01-01	629406
2003-02-01	635996
2003-03-01	640891
2003-04-01	647271
2003-05-01	650859
2003-06-01	651993
2003-07-01	652856
2003-08-01	653671
2003-09-01	655993
2003-10-01	658672
2003-11-01	664515
2003-12-01	666665
2004-01-01	667060
2004-02-01	671527
2004-03-01	674084
2004-04-01	676383
2004-05-01	680633
2004-06-01	687391
2004-07-01	693717
2004-08-01	694840
2004-09-01	698617
2004-10-01	706730
2004-11-01	711595
2004-12-01	717813
2005-01-01	717827
2005-02-01	717839
2005-03-01	717536
2005-04-01	718638
2005-05-01	722992
2005-06-01	726022
2005-07-01	724702
2005-08-01	730380
2005-09-01	736082
2005-10-01	739542
2005-11-01	744168
2005-12-01	744210
2006-01-01	746588
2006-02-01	752549
2006-03-01	758529
2006-04-01	759683
2006-05-01	762411
2006-06-01	766349
2006-07-01	764763
2006-08-01	766738
2006-09-01	768915
2006-10-01	768422
2006-11-01	772610
2006-12-01	778938
2007-01-01	778863
2007-02-01	780793
2007-03-01	780890
2007-04-01	787149
2007-05-01	790260
2007-06-01	790497
2007-07-01	790714
2007-08-01	784637
2007-09-01	779633
2007-10-01	779586
2007-11-01	779693
2007-12-01	754612
2008-01-01	718371
2008-02-01	713355
2008-03-01	612305
2008-04-01	548692
2008-05-01	491091
2008-06-01	478796
2008-07-01	479206
2008-08-01	479642
2008-09-01	476578
2008-10-01	476469
2008-11-01	476407
2008-12-01	475921
2009-01-01	475129
2009-02-01	474643
2009-03-01	474746
2009-04-01	549046
2009-05-01	600142
2009-06-01	653193
2009-07-01	695758
2009-08-01	744878
2009-09-01	769160
2009-10-01	774561
2009-11-01	776535
2009-12-01	776587
2010-01-01	776619
2010-02-01	776549
2010-03-01	776705
2010-04-01	776717
2010-05-01	776877
2010-06-01	776989
2010-07-01	777021
2010-08-01	784498
2010-09-01	811669
2010-10-01	837848
2010-11-01	901238
2010-12-01	1016102
2011-01-01	1114448
2011-02-01	1213425
2011-03-01	1333445
2011-04-01	1413467
2011-05-01	1519327
2011-06-01	1617060
2011-07-01	1638161
2011-08-01	1652113
2011-09-01	1664655
2011-10-01	1678012
2011-11-01	1672038
2011-12-01	1672092
2012-01-01	1661529
2012-02-01	1661601
2012-03-01	1664911
2012-04-01	1667766
2012-05-01	1656675
2012-06-01	1666530
2012-07-01	1651432
2012-08-01	1639413
2012-09-01	1648403
2012-10-01	1645334
2012-11-01	1646645
2012-12-01	1656930
2013-01-01	1710058
2013-02-01	1749545
2013-03-01	1794459
2013-04-01	1836227
2013-05-01	1883559
2013-06-01	1928416
2013-07-01	1982407
2013-08-01	2023610
2013-09-01	2062004
2013-10-01	2117750
2013-11-01	2163666
2013-12-01	2208829
2014-01-01	2243176
2014-02-01	2278256
2014-03-01	2311539
2014-04-01	2350272
2014-05-01	2370724
2014-06-01	2396972
2014-07-01	2420285
2014-08-01	2435932
2014-09-01	2448625
2014-10-01	2461580
2014-11-01	2461645
2014-12-01	2461364
2015-01-01	2460804
2015-02-01	2460167
2015-03-01	2459666
2015-04-01	2460034
2015-05-01	2460639
2015-06-01	2460911
2015-07-01	2461502
2015-08-01	2461876
2015-09-01	2461948
2015-10-01	2461800
2015-11-01	2461628
2015-12-01	2461554
2016-01-01	2461341
2016-02-01	2461211
2016-03-01	2461326
2016-04-01	2461413
2016-05-01	2461637
2016-06-01	2462303
2016-07-01	2462763
2016-08-01	2463645
2016-09-01	2463460
2016-10-01	2463544
2016-11-01	2463861
2016-12-01	2463601
2017-01-01	2463462
2017-02-01	2463456
2017-03-01	2464335
2017-04-01	2464730
2017-05-01	2464696
2017-06-01	2465046
2017-07-01	2465170
2017-08-01	2465300
2017-09-01	2465427
2017-10-01	2465727
2017-11-01	2456959
2017-12-01	2454219
2018-01-01	2436211
2018-02-01	2424242
2018-03-01	2424883
2018-04-01	2413218
2018-05-01	2387103
2018-06-01	2378250
2018-07-01	2359893
2018-08-01	2324589
2018-09-01	2313208
2018-10-01	2270399
2018-11-01	2253117
2018-12-01	2240717
2019-01-01	2220115
