# Supplementary material for: Optimal Macroeconomic Policy in Nonlinear Models: A VSTAR Perspective
Source: publisher site journal article supplement (doi:10.1515/snde-2024-0100), 2025-10-08
Supplement: Supplementary file 28 [file GDP_Deflator.xls]

## Sheet: FRED Graph
observation_date	USAGDPDEFQISMEI			Final series (combines interpolation+markit) GDP	DEFLATOR	Real GDP	Growth
1978-01-01	33.2617		1978-01-01	2202.76	33.2617	66.2251
1978-04-01	33.8978		1978-02-01	2245.72	33.4738	67.0889
1978-07-01	34.4732		1978-03-01	2288.68	33.6858	67.9419
1978-10-01	35.1791		1978-04-01	2331.63	33.8978	68.7842
1979-01-01	35.82		1978-05-01	2352.77	34.0896	69.0173
1979-04-01	36.6972		1978-06-01	2373.91	34.2814	69.2478
1979-07-01	37.4994		1978-07-01	2395.05	34.4732	69.4758
1979-10-01	38.1956		1978-08-01	2422.35	34.7085	69.7913
1980-01-01	38.9978		1978-09-01	2449.65	34.9438	70.1026
1980-04-01	39.9255		1978-10-01	2476.95	35.1791	70.4096
1980-07-01	40.8179		1978-11-01	2493.5	35.3928	70.4524
1980-10-01	41.8813		1978-12-01	2510.06	35.6064	70.4945
1981-01-01	42.984		1979-01-01	2526.61	35.82	70.5362	6.5099
1981-04-01	43.8362		1979-02-01	2548.16	36.1124	70.5618	5.17655
1981-07-01	44.6608		1979-03-01	2569.7	36.4048	70.5869	3.89313
1981-10-01	45.4326		1979-04-01	2591.25	36.6972	70.6117	2.65687
1982-01-01	46.0579		1979-05-01	2616.69	36.9646	70.789	2.5671
1982-04-01	46.6563		1979-06-01	2642.13	37.232	70.9639	2.47812
1982-07-01	47.3182		1979-07-01	2667.57	37.4994	71.1362	2.38993
1982-10-01	47.8084		1979-08-01	2686.34	37.7315	71.1962	2.01306
1983-01-01	48.1692		1979-09-01	2705.11	37.9635	71.2555	1.6447
1983-04-01	48.5271		1979-10-01	2723.88	38.1956	71.3141	1.28456
1983-07-01	49.0427		1979-11-01	2745.87	38.463	71.3899	1.33077
1983-10-01	49.4146		1979-12-01	2767.86	38.7304	71.4647	1.37617
1984-01-01	49.9149		1980-01-01	2789.84	38.9978	71.5384	1.42078
1984-04-01	50.3421		1980-02-01	2792.35	39.307	71.0393	0.676773
1984-07-01	50.7897		1980-03-01	2794.85	39.6162	70.548	-0.0550793
1984-10-01	51.1693		1980-04-01	2797.35	39.9255	70.0644	-0.775071
1985-01-01	51.6752		1980-05-01	2817.06	40.2229	70.0362	-1.0635
1985-04-01	52.0079		1980-06-01	2836.77	40.5204	70.0084	-1.34636
1985-07-01	52.3215		1980-07-01	2856.48	40.8179	69.9811	-1.62381
1985-10-01	52.6141		1980-08-01	2899.51	41.1724	70.4236	-1.0852
1986-01-01	52.8759		1980-09-01	2942.53	41.5268	70.8586	-0.557074
1986-04-01	53.0761		1980-10-01	2985.56	41.8813	71.2862	-0.039142
1986-07-01	53.2938		1980-11-01	3031.77	42.2489	71.7599	0.518262
1986-10-01	53.5839		1980-12-01	3077.99	42.6164	72.2254	1.06453
1987-01-01	53.9244		1981-01-01	3124.21	42.984	72.683	1.59998
1987-04-01	54.2979		1981-02-01	3136.98	43.2681	72.5011	2.05769
1987-07-01	54.7089		1981-03-01	3149.76	43.5521	72.3216	2.51393
1987-10-01	55.1446		1981-04-01	3162.53	43.8362	72.1444	2.96869
1988-01-01	55.5774		1981-05-01	3195.22	44.111	72.4359	3.42642
1988-04-01	56.1181		1981-06-01	3227.92	44.3859	72.7239	3.87874
1988-07-01	56.7887		1981-07-01	3260.61	44.6608	73.0083	4.32576
1988-10-01	57.2797		1981-08-01	3267.35	44.9181	72.7401	3.28938
1989-01-01	57.8767		1981-09-01	3274.08	45.1753	72.475	2.28116
1989-04-01	58.4931		1981-10-01	3280.82	45.4326	72.2129	1.29991
1989-07-01	58.9206		1981-11-01	3278.65	45.641	71.8355	0.105332
1989-10-01	59.3403		1981-12-01	3276.47	45.8495	71.4615	-1.05764
1990-01-01	59.9803		1982-01-01	3274.3	46.0579	71.091	-2.19034
1990-04-01	60.6521		1982-02-01	3293.53	46.2574	71.2	-1.79455
1990-07-01	61.172		1982-03-01	3312.75	46.4568	71.3081	-1.40129
1990-10-01	61.6274		1982-04-01	3331.97	46.6563	71.4153	-1.01055
1991-01-01	62.231		1982-05-01	3343.42	46.8769	71.3234	-1.53582
1991-04-01	62.6876		1982-06-01	3354.87	47.0975	71.2324	-2.05084
1991-07-01	63.1775		1982-07-01	3366.32	47.3182	71.1423	-2.5559
1991-10-01	63.5526		1982-08-01	3378.4	47.4816	71.1518	-2.18351
1992-01-01	63.7889		1982-09-01	3390.48	47.645	71.1613	-1.8126
1992-04-01	64.1723		1982-10-01	3402.56	47.8084	71.1707	-1.44315
1992-07-01	64.4859		1982-11-01	3426.18	47.9287	71.4849	-0.48801
1992-10-01	64.9296		1982-12-01	3449.8	48.0489	71.7976	0.470197
1993-01-01	65.2932		1983-01-01	3473.41	48.1692	72.1086	1.43146
1993-04-01	65.6818		1983-02-01	3508.56	48.2885	72.6583	2.04814
1993-07-01	66.0722		1983-03-01	3543.7	48.4078	73.2053	2.66048
1993-10-01	66.4325		1983-04-01	3578.85	48.5271	73.7495	3.26853
1994-01-01	66.7501		1983-05-01	3615.62	48.6989	74.2444	4.09543
1994-04-01	67.0728		1983-06-01	3652.4	48.8708	74.7359	4.9183
1994-07-01	67.4573		1983-07-01	3689.18	49.0427	75.2238	5.73717
1994-10-01	67.8233		1983-08-01	3724.35	49.1667	75.7496	6.46191
1995-01-01	68.1909		1983-09-01	3759.53	49.2906	76.2727	7.18284
1995-04-01	68.5187		1983-10-01	3794.71	49.4146	76.7932	7.89998
1995-07-01	68.856		1983-11-01	3832.49	49.5814	77.2969	8.13039
1995-10-01	69.1879		1983-12-01	3870.27	49.7482	77.7973	8.35646
1996-01-01	69.5208		1984-01-01	3908.05	49.9149	78.2943	8.57827
1996-04-01	69.8087		1984-02-01	3941.9	50.0573	78.7478	8.381
1996-07-01	70.0371		1984-03-01	3975.75	50.1997	79.1987	8.18717
1996-10-01	70.4116		1984-04-01	4009.6	50.3421	79.6471	7.9967
1997-01-01	70.8314		1984-05-01	4034.48	50.4913	79.9045	7.62359
1997-04-01	70.9745		1984-06-01	4059.37	50.6405	80.1605	7.25838
1997-07-01	71.2826		1984-07-01	4084.25	50.7897	80.4149	6.90084
1997-10-01	71.5166		1984-08-01	4105.68	50.9162	80.636	6.45079
1998-01-01	71.6213		1984-09-01	4127.12	51.0428	80.8561	6.0092
1998-04-01	71.7905		1984-10-01	4148.55	51.1693	81.075	5.5758
1998-07-01	72.0991		1984-11-01	4175.76	51.3379	81.3386	5.22881
1998-10-01	72.2975		1984-12-01	4202.96	51.5066	81.6005	4.88865
1999-01-01	72.5696		1985-01-01	4230.17	51.6752	81.8607	4.55511
1999-04-01	72.8331		1985-02-01	4251.74	51.7861	82.102	4.2594
1999-07-01	73.082		1985-03-01	4273.31	51.897	82.3422	3.96916
1999-10-01	73.4751		1985-04-01	4294.89	52.0079	82.5815	3.68423
2000-01-01	73.9755		1985-05-01	4325.52	52.1124	83.0035	3.87835
2000-04-01	74.4233		1985-06-01	4356.14	52.217	83.4239	4.07109
2000-07-01	74.8473		1985-07-01	4386.77	52.3215	83.8426	4.26246
2000-10-01	75.2431		1985-08-01	4405.88	52.4191	84.0511	4.23512
2001-01-01	75.703		1985-09-01	4424.99	52.5166	84.2588	4.20838
2001-04-01	76.161		1985-10-01	4444.09	52.6141	84.4658	4.18224
2001-07-01	76.4674		1985-11-01	4465.36	52.7014	84.7295	4.16879
2001-10-01	76.7203		1985-12-01	4486.63	52.7886	84.9923	4.15656
2002-01-01	76.9731		1986-01-01	4507.89	52.8759	85.2543	4.14552
2002-04-01	77.2489		1986-02-01	4520.38	52.9426	85.3826	3.99575
2002-07-01	77.6049		1986-03-01	4532.86	53.0093	85.5106	3.84776
2002-10-01	78.0447		1986-04-01	4545.34	53.0761	85.6382	3.70153
2003-01-01	78.3996		1986-05-01	4566.12	53.1487	85.9122	3.50426
2003-04-01	78.6301		1986-06-01	4586.89	53.2212	86.1854	3.31018
2003-07-01	79.0561		1986-07-01	4607.67	53.2938	86.4578	3.11923
2003-10-01	79.5232		1986-08-01	4624.32	53.3905	86.6132	3.04824
2004-01-01	80.1152		1986-09-01	4640.97	53.4872	86.7679	2.97789
2004-04-01	80.7687		1986-10-01	4657.63	53.5839	86.9222	2.90815
2004-07-01	81.2966		1986-11-01	4679.14	53.6974	87.139	2.84377
2004-10-01	81.9236		1986-12-01	4700.65	53.8109	87.3549	2.77977
2005-01-01	82.5725		1987-01-01	4722.16	53.9244	87.5699	2.71613
2005-04-01	83.1508		1987-02-01	4750.16	54.0489	87.8863	2.93232
2005-07-01	83.9027		1987-03-01	4778.16	54.1734	88.2012	3.14654
2005-10-01	84.578		1987-04-01	4806.16	54.2979	88.5147	3.35882
2006-01-01	85.1681		1987-05-01	4832.29	54.4349	88.7719	3.32872
2006-04-01	85.8807		1987-06-01	4858.42	54.5719	89.0279	3.2982
2006-07-01	86.4819		1987-07-01	4884.56	54.7089	89.2826	3.26728
2006-10-01	86.8011		1987-08-01	4925.7	54.8541	89.7963	3.67518
2007-01-01	87.6542		1987-09-01	4966.85	54.9994	90.3074	4.07917
2007-04-01	88.221		1987-10-01	5007.99	55.1446	90.8157	4.4793
2007-07-01	88.6755		1987-11-01	5029.79	55.2889	90.9729	4.39974
2007-10-01	89.0281		1987-12-01	5051.58	55.4331	91.1293	4.32074
2008-01-01	89.3569		1988-01-01	5073.37	55.5774	91.2848	4.24228
2008-04-01	89.8358		1988-02-01	5112.26	55.7576	91.6872	4.32485
2008-07-01	90.5052		1988-03-01	5151.15	55.9378	92.087	4.40561
2008-10-01	90.788		1988-04-01	5190.04	56.1181	92.4842	4.4846
2009-01-01	90.7783		1988-05-01	5220.97	56.3416	92.6663	4.38688
2009-04-01	90.6459		1988-06-01	5251.9	56.5652	92.8469	4.28962
2009-07-01	90.7416		1988-07-01	5282.84	56.7887	93.0261	4.19282
2009-10-01	91.0485		1988-08-01	5321.73	56.9524	93.4417	4.05953
2010-01-01	91.2782		1988-09-01	5360.62	57.116	93.8548	3.92824
2010-04-01	91.7022		1988-10-01	5399.51	57.2797	94.2657	3.7989
2010-07-01	91.9692		1988-11-01	5436.76	57.4787	94.5873	3.9731
2010-10-01	92.4865		1988-12-01	5474.01	57.6777	94.9067	4.14518
2011-01-01	92.983		1989-01-01	5511.25	57.8767	95.224	4.31521
2011-04-01	93.5935		1989-02-01	5544.99	58.0822	95.468	4.12352
2011-07-01	94.1974		1989-03-01	5578.73	58.2877	95.7102	3.93457
2011-10-01	94.3399		1989-04-01	5612.46	58.4931	95.9508	3.7483
2012-01-01	94.9302		1989-05-01	5640.1	58.6356	96.1889	3.80142
2012-04-01	95.3053		1989-06-01	5667.73	58.7781	96.4259	3.85469
2012-07-01	95.795		1989-07-01	5695.36	58.9206	96.6617	3.90812
2012-10-01	96.2847		1989-08-01	5712.66	59.0605	96.7255	3.51428
2013-01-01	96.6688		1989-09-01	5729.95	59.2004	96.7889	3.12621
2013-04-01	96.9479		1989-10-01	5747.24	59.3403	96.8521	2.74381
2013-07-01	97.4131		1989-11-01	5789.06	59.5536	97.2075	2.77008
2013-10-01	97.9861		1989-12-01	5830.88	59.767	97.5602	2.79591
2014-01-01	98.3871		1990-01-01	5872.7	59.9803	97.9105	2.8213
2014-04-01	98.9366		1990-02-01	5901.81	60.2042	98.0298	2.68351
2014-07-01	99.3621		1990-03-01	5930.92	60.4281	98.1483	2.54734
2014-10-01	99.5211		1990-04-01	5960.03	60.6521	98.2659	2.41276
2015-01-01	99.4331		1990-05-01	5978.39	60.8254	98.2878	2.18203
2015-04-01	99.9727		1990-06-01	5996.75	60.9987	98.3096	1.95352
2015-07-01	100.289		1990-07-01	6015.12	61.172	98.3312	1.72721
2015-10-01	100.299		1990-08-01	6011.65	61.3238	98.0313	1.3501
2016-01-01	100.23		1990-09-01	6008.19	61.4756	97.733	0.975328
2016-04-01	100.925		1990-10-01	6004.73	61.6274	97.436	0.602876
2016-07-01	101.267		1990-11-01	6014.88	61.8286	97.2831	0.0778083
2016-10-01	101.763		1990-12-01	6025.03	62.0298	97.1311	-0.439829
2017-01-01	102.28		1991-01-01	6035.18	62.231	96.9802	-0.950195
2017-04-01	102.596		1991-02-01	6065.74	62.3832	97.2335	-0.812381
2017-07-01	103.104		1991-03-01	6096.3	62.5354	97.4855	-0.675264
2017-10-01	103.798		1991-04-01	6126.86	62.6876	97.7364	-0.538838
2018-01-01	104.409		1991-05-01	6153.22	62.8509	97.9018	-0.392656
2018-04-01	105.306		1991-06-01	6179.58	63.0142	98.0664	-0.247285
2018-07-01	105.725		1991-07-01	6205.94	63.1775	98.2302	-0.102719
2018-10-01	106.228		1991-08-01	6225.47	63.3025	98.3448	0.319724
2019-01-01	106.499		1991-09-01	6245.01	63.4275	98.4589	0.74277
2019-04-01	107.184		1991-10-01	6264.54	63.5526	98.5725	1.16642
2019-07-01	107.557		1991-11-01	6297.39	63.6314	98.9668	1.73077
2019-10-01	107.958		1991-12-01	6330.25	63.7101	99.3602	2.29485
2020-01-01	108.402		1992-01-01	6315.83	63.7889	99.0114	2.09445
2020-04-01	107.83		1992-02-01	6356.43	63.9167	99.4486	2.27814
2020-07-01	108.808		1992-03-01	6417.05	64.0445	100.197	2.78119
2020-10-01	109.339		1992-04-01	6443.28	64.1723	100.406	2.73137
			1992-05-01	6433.98	64.2768	100.098	2.24318
			1992-06-01	6535.03	64.3814	101.505	3.50637
			1992-07-01	6557.53	64.4859	101.689	3.52155
			1992-08-01	6556.62	64.6338	101.443	3.15002
			1992-09-01	6585.77	64.7817	101.661	3.25212
			1992-10-01	6637.31	64.9296	102.223	3.70336
			1992-11-01	6680.25	65.0508	102.693	3.76488
			1992-12-01	6724.85	65.172	103.186	3.85061
			1993-01-01	6717.71	65.2932	102.885	3.91258
			1993-02-01	6741.54	65.4228	103.046	3.61708
			1993-03-01	6729.13	65.5523	102.653	2.45123
			1993-04-01	6768.32	65.6818	103.047	2.6304
			1993-05-01	6824.2	65.812	103.692	3.59099
			1993-06-01	6834.3	65.9421	103.641	2.10425
			1993-07-01	6832.98	66.0722	103.417	1.69873
			1993-08-01	6873.97	66.1923	103.849	2.37168
			1993-09-01	6939.34	66.3124	104.646	2.93662
			1993-10-01	6944.72	66.4325	104.538	2.26462
			1993-11-01	7036.01	66.5383	105.744	2.9708
			1993-12-01	7060.49	66.6442	105.943	2.67175
			1994-01-01	7074.47	66.7501	105.984	3.0121
			1994-02-01	7122.96	66.8577	106.539	3.39011
			1994-03-01	7149.53	66.9652	106.765	4.00576
			1994-04-01	7186.28	67.0728	107.142	3.97352
			1994-05-01	7290.27	67.2009	108.485	4.62153
			1994-06-01	7264.24	67.3291	107.892	4.10133
			1994-07-01	7299.04	67.4573	108.202	4.62748
			1994-08-01	7351.72	67.5793	108.787	4.75504
			1994-09-01	7342.47	67.7013	108.454	3.63857
			1994-10-01	7429.13	67.8233	109.537	4.78165
			1994-11-01	7431.81	67.9458	109.379	3.43746
			1994-12-01	7504.92	68.0683	110.256	4.0707
			1995-01-01	7542.18	68.1909	110.604	4.35882
			1995-02-01	7488.28	68.3001	109.638	2.90857
			1995-03-01	7536.4	68.4094	110.166	3.18579
			1995-04-01	7538.96	68.5187	110.028	2.69385
			1995-05-01	7560.86	68.6311	110.167	1.55052
			1995-06-01	7643.17	68.7435	111.184	3.05141
			1995-07-01	7630.48	68.856	110.818	2.41722
			1995-08-01	7674.12	68.9666	111.273	2.28555
			1995-09-01	7744.77	69.0773	112.118	3.37804
			1995-10-01	7747.38	69.1879	111.976	2.22693
			1995-11-01	7747.69	69.2989	111.801	2.21491
			1995-12-01	7822.68	69.4098	112.703	2.21955
			1996-01-01	7840.44	69.5208	112.778	1.96595
			1996-02-01	7852.86	69.6167	112.801	2.88537
			1996-03-01	7912.11	69.7127	113.496	3.02241
			1996-04-01	8025.06	69.8087	114.958	4.48066
			1996-05-01	8009.41	69.8849	114.609	4.03209
			1996-06-01	8064.05	69.961	115.265	3.67061
			1996-07-01	8099.34	70.0371	115.644	4.3545
			1996-08-01	8122.94	70.1619	115.774	4.04515
			1996-09-01	8171.95	70.2868	116.266	3.69999
			1996-10-01	8251.07	70.4116	117.183	4.65047
			1996-11-01	8281.77	70.5515	117.386	4.99552
			1996-12-01	8246.48	70.6914	116.655	3.50632
			1997-01-01	8309.34	70.8314	117.312	4.01961
			1997-02-01	8385.54	70.8791	118.308	4.88153
			1997-03-01	8393.08	70.9268	118.334	4.26319
			1997-04-01	8512.11	70.9745	119.932	4.32694
			1997-05-01	8476.29	71.0772	119.255	4.05381
			1997-06-01	8568.07	71.1799	120.372	4.43074
			1997-07-01	8620.8	71.2826	120.938	4.57852
			1997-08-01	8655.76	71.3606	121.296	4.76958
			1997-09-01	8711.91	71.4386	121.95	4.88857
			1997-10-01	8747.99	71.5166	122.321	4.38434
			1997-11-01	8736.43	71.5515	122.1	4.01555
			1997-12-01	8813.29	71.5864	123.114	5.53731
			1998-01-01	8772.59	71.6213	122.486	4.41052
			1998-02-01	8894.38	71.6777	124.088	4.88619
			1998-03-01	8932.48	71.7341	124.522	5.229
			1998-04-01	8925.74	71.7905	124.33	3.66756
			1998-05-01	8952.66	71.8933	124.527	4.42102
			1998-06-01	9030.69	71.9962	125.433	4.2043
			1998-07-01	9050.71	72.0991	125.532	3.79804
			1998-08-01	9100.03	72.1652	126.1	3.96037
			1998-09-01	9212.55	72.2314	127.542	4.58599
			1998-10-01	9265.45	72.2975	128.157	4.77115
			1998-11-01	9307.06	72.3882	128.571	5.30018
			1998-12-01	9309.47	72.4789	128.444	4.3291
			1999-01-01	9361.74	72.5696	129.004	5.3213
			1999-02-01	9417.41	72.6574	129.614	4.45276
			1999-03-01	9472.65	72.7453	130.217	4.57315
			1999-04-01	9495.08	72.8331	130.368	4.85573
			1999-05-01	9534.1	72.916	130.754	5.00088
			1999-06-01	9543.28	72.999	130.732	4.22439
			1999-07-01	9654.43	73.082	132.104	5.23583
			1999-08-01	9655.39	73.213	131.881	4.58443
			1999-09-01	9735.74	73.3441	132.741	4.07592
			1999-10-01	9817.27	73.4751	133.614	4.2575
			1999-11-01	9888.62	73.6419	134.28	4.43981
			1999-12-01	9992.25	73.8087	135.38	5.40041
			2000-01-01	9925.78	73.9755	134.176	4.00993
			2000-02-01	9995.7	74.1248	134.85	4.03948
			2000-03-01	10087.1	74.274	135.809	4.29477
			2000-04-01	10224.2	74.4233	137.379	5.37786
			2000-05-01	10231.7	74.5646	137.219	4.94439
			2000-06-01	10287.1	74.706	137.702	5.33168
			2000-07-01	10236.9	74.8473	136.77	3.53202
			2000-08-01	10341.9	74.9792	137.931	4.58725
			2000-09-01	10380.7	75.1112	138.204	4.11583
			2000-10-01	10440.8	75.2431	138.761	3.85281
			2000-11-01	10448.6	75.3964	138.583	3.20439
			2000-12-01	10427.6	75.5497	138.023	1.95204
			2001-01-01	10471.5	75.703	138.323	3.09057
			2001-02-01	10465.9	75.8557	137.971	2.315
			2001-03-01	10481.2	76.0083	137.896	1.53645
			2001-04-01	10562.9	76.161	138.692	0.955711
			2001-05-01	10639.6	76.2631	139.511	1.67007
			2001-06-01	10591	76.3652	138.689	0.716942
			2001-07-01	10582.3	76.4674	138.39	1.18442
			2001-08-01	10693.3	76.5517	139.687	1.27356
			2001-09-01	10513.3	76.636	137.185	-0.737709
			2001-10-01	10641.4	76.7203	138.704	-0.041019
			2001-11-01	10586.1	76.8045	137.832	-0.541565
			2001-12-01	10753.3	76.8888	139.855	1.32763
			2002-01-01	10787	76.9731	140.14	1.31303
			2002-02-01	10754.8	77.065	139.554	1.14732
			2002-03-01	10825.1	77.157	140.3	1.7436
			2002-04-01	10867.2	77.2489	140.678	1.43249
			2002-05-01	10873.4	77.3676	140.542	0.738709
			2002-06-01	10939	77.4862	141.173	1.79136
			2002-07-01	11007.3	77.6049	141.838	2.49109
			2002-08-01	10961.9	77.7515	140.986	0.929944
			2002-09-01	11007	77.8981	141.3	2.99984
			2002-10-01	11004.3	78.0447	141.001	1.65536
			2002-11-01	11063.8	78.163	141.547	2.69541
			2002-12-01	11146.3	78.2813	142.388	1.81067
			2003-01-01	11145.2	78.3996	142.16	1.44146
			2003-02-01	11221.7	78.4764	142.995	2.46529
			2003-03-01	11183.6	78.5532	142.369	1.47469
			2003-04-01	11260	78.6301	143.202	1.79391
			2003-05-01	11274.8	78.7721	143.132	1.84281
			2003-06-01	11403.9	78.9141	144.51	2.3634
			2003-07-01	11463.4	79.0561	145.003	2.2316
			2003-08-01	11570.6	79.2118	146.072	3.60744
			2003-09-01	11668	79.3675	147.012	4.04268
			2003-10-01	11696.4	79.5232	147.082	4.31285
			2003-11-01	11782.7	79.7206	147.8	4.41728
			2003-12-01	11828.7	79.9179	148.011	3.94941
			2004-01-01	11805.2	80.1152	147.353	3.65312
			2004-02-01	11923.5	80.333	148.426	3.79816
			2004-03-01	12031.8	80.5509	149.369	4.9167
			2004-04-01	12032.4	80.7687	148.974	4.03037
			2004-05-01	12169.9	80.9447	150.348	5.04203
			2004-06-01	12124.7	81.1206	149.465	3.42862
			2004-07-01	12278.9	81.2966	151.039	4.16252
			2004-08-01	12299.4	81.5056	150.903	3.30725
			2004-09-01	12331.7	81.7146	150.911	2.65235
			2004-10-01	12466	81.9236	152.166	3.4569
			2004-11-01	12510.6	82.1399	152.308	3.05037
			2004-12-01	12590.7	82.3562	152.881	3.29014
			2005-01-01	12745.1	82.5725	154.351	4.74906
			2005-02-01	12745.5	82.7653	153.995	3.75234
			2005-03-01	12793.4	82.9581	154.215	3.24456
			2005-04-01	12845.1	83.1508	154.48	3.69613
			2005-05-01	12874	83.4015	154.361	2.66907
			2005-06-01	13011	83.6521	155.537	4.06271
			2005-07-01	13088.5	83.9027	155.996	3.28219
			2005-08-01	13151.5	84.1278	156.327	3.5944
			2005-09-01	13188.7	84.3529	156.351	3.60459
			2005-10-01	13246.6	84.578	156.619	2.92659
			2005-11-01	13305.6	84.7747	156.953	3.0494
			2005-12-01	13444.8	84.9714	158.227	3.49684
			2006-01-01	13531.1	85.1681	158.875	2.9313
			2006-02-01	13571.4	85.4056	158.905	3.18804
			2006-03-01	13709.3	85.6432	160.075	3.79965
			2006-04-01	13689.4	85.8807	159.4	3.18514
			2006-05-01	13778.6	86.0811	160.066	3.69547
			2006-06-01	13781.4	86.2815	159.726	2.69334
			2006-07-01	13785.6	86.4819	159.405	2.18529
			2006-08-01	13879.6	86.5883	160.294	2.53766
			2006-09-01	13937.2	86.6947	160.762	2.82086
			2006-10-01	13969	86.8011	160.931	2.75292
			2006-11-01	14057.5	87.0855	161.422	2.84755
			2006-12-01	14085.2	87.3698	161.213	1.88744
			2007-01-01	14131.2	87.6542	161.215	1.47292
			2007-02-01	14279	87.8431	162.552	2.29503
			2007-03-01	14215.5	88.032	161.481	0.878063
			2007-04-01	14342.6	88.221	162.576	1.99216
			2007-05-01	14380.5	88.3725	162.726	1.66233
			2007-06-01	14424	88.524	162.939	2.01122
			2007-07-01	14393.8	88.6755	162.32	1.82869
			2007-08-01	14571.2	88.793	164.103	2.37633
			2007-09-01	14640	88.9106	164.66	2.42472
			2007-10-01	14630.7	89.0281	164.338	2.11687
			2007-11-01	14687.8	89.1377	164.776	2.07799
			2007-12-01	14726	89.2473	165.003	2.35048
			2008-01-01	14754.2	89.3569	165.115	2.41899
			2008-02-01	14569	89.5165	162.752	0.123435
			2008-03-01	14629.9	89.6761	163.142	1.02869
			2008-04-01	14698.8	89.8358	163.618	0.641152
			2008-05-01	14743.9	90.0589	163.714	0.60698
			2008-06-01	14974.2	90.282	165.86	1.79291
			2008-07-01	14904.6	90.5052	164.682	1.4554
			2008-08-01	14858.4	90.5995	164.001	-0.0626332
			2008-09-01	14742.6	90.6937	162.554	-1.27895
			2008-10-01	14637	90.788	161.222	-1.89611
			2008-11-01	14653.2	90.7848	161.406	-2.04569
			2008-12-01	14388.5	90.7816	158.495	-3.94371
			2009-01-01	14444.4	90.7783	159.117	-3.63273
			2009-02-01	14402.4	90.7342	158.732	-2.47008
			2009-03-01	14336.8	90.69	158.086	-3.09889
			2009-04-01	14328.4	90.6459	158.07	-3.39057
			2009-05-01	14350.2	90.6778	158.255	-3.3347
			2009-06-01	14379.9	90.7097	158.527	-4.4212
			2009-07-01	14347.7	90.7416	158.116	-3.98746
			2009-08-01	14454	90.8439	159.108	-2.98322
			2009-09-01	14459.3	90.9462	158.987	-2.19402
			2009-10-01	14670.9	91.0485	161.133	-0.0550846
			2009-11-01	14642.5	91.1251	160.685	-0.446135
			2009-12-01	14570.7	91.2016	159.763	0.799952
			2010-01-01	14671.6	91.2782	160.735	1.01716
			2010-02-01	14691.7	91.4195	160.706	1.24363
			2010-03-01	14800.7	91.5609	161.649	2.25375
			2010-04-01	14898.5	91.7022	162.466	2.78054
			2010-05-01	14899.1	91.7912	162.315	2.56574
			2010-06-01	14980.7	91.8802	163.046	2.85086
			2010-07-01	15056.9	91.9692	163.716	3.54224
			2010-08-01	15049.9	92.1416	163.334	2.65602
			2010-09-01	15133	92.3141	163.93	3.10868
			2010-10-01	15221.5	92.4865	164.581	2.13984
			2010-11-01	15194.1	92.652	163.991	2.05688
			2010-12-01	15307	92.8175	164.915	3.22436
			2011-01-01	15186.1	92.983	163.322	1.60901
			2011-02-01	15220.2	93.1865	163.331	1.63302
			2011-03-01	15451.1	93.39	165.447	2.34979
			2011-04-01	15525.3	93.5935	165.88	2.10152
			2011-05-01	15505.6	93.7948	165.314	1.84731
			2011-06-01	15457.7	93.9961	164.451	0.861367
			2011-07-01	15560.8	94.1974	165.193	0.90217
			2011-08-01	15658.7	94.2449	166.149	1.72357
			2011-09-01	15556	94.2924	164.977	0.63863
			2011-10-01	15812.2	94.3399	167.608	1.83959
			2011-11-01	15789.7	94.5367	167.022	1.84878
			2011-12-01	15787.5	94.7334	166.652	1.05322
			2012-01-01	15888.9	94.9302	167.374	2.48138
			2012-02-01	16159.2	95.0552	169.998	4.08243
			2012-03-01	16011.2	95.1803	168.219	1.6754
			2012-04-01	16129.1	95.3053	169.236	2.02329
			2012-05-01	16162.8	95.4686	169.3	2.4115
			2012-06-01	16164.8	95.6318	169.032	2.78573
			2012-07-01	16261.9	95.795	169.757	2.76258
			2012-08-01	16207.5	95.9582	168.902	1.65665
			2012-09-01	16302.1	96.1215	169.599	2.80168
			2012-10-01	16271.4	96.2847	168.993	0.82598
			2012-11-01	16345.7	96.4127	169.539	1.50692
			2012-12-01	16459.4	96.5408	170.492	2.30439
			2013-01-01	16610.6	96.6688	171.83	2.66248
			2013-02-01	16520.5	96.7618	170.733	0.432335
			2013-03-01	16577.6	96.8548	171.16	1.74792
			2013-04-01	16592.6	96.9479	171.15	1.13063
			2013-05-01	16584.2	97.103	170.79	0.880105
			2013-06-01	16737	97.2581	172.088	1.80813
			2013-07-01	16784.2	97.4131	172.299	1.49745
			2013-08-01	16873.3	97.6041	172.874	2.35212
			2013-09-01	16888.8	97.7951	172.696	1.826
			2013-10-01	16997.7	97.9861	173.47	2.64929
			2013-11-01	17123.1	98.1198	174.512	2.93307
			2013-12-01	17128.7	98.2535	174.332	2.25212
			2014-01-01	17023.5	98.3871	173.026	0.695791
			2014-02-01	17111.5	98.5703	173.597	1.6773
			2014-03-01	17173.7	98.7534	173.905	1.60412
			2014-04-01	17313.9	98.9366	175	2.24952
			2014-05-01	17430.2	99.0784	175.923	3.00552
			2014-06-01	17533.2	99.2203	176.71	2.68582
			2014-07-01	17650.6	99.3621	177.639	3.09922
			2014-08-01	17777.7	99.4151	178.823	3.44079
			2014-09-01	17731.2	99.4681	178.26	3.22235
			2014-10-01	17830.3	99.5211	179.161	3.28091
			2014-11-01	17850.7	99.4918	179.419	2.81178
			2014-12-01	17834.3	99.4625	179.307	2.85395
			2015-01-01	17884.8	99.4331	179.868	3.95426
			2015-02-01	18032.5	99.613	181.025	4.27885
			2015-03-01	17994	99.7929	180.313	3.68473
			2015-04-01	18166.2	99.9727	181.712	3.83559
			2015-05-01	18201.6	100.078	181.874	3.38266
			2015-06-01	18296	100.183	182.626	3.34767
			2015-07-01	18288.7	100.289	182.361	2.65831
			2015-08-01	18315.3	100.292	182.619	2.12307
			2015-09-01	18389.3	100.296	183.351	2.8556
			2015-10-01	18387.8	100.299	183.329	2.3263
			2015-11-01	18324.1	100.276	182.736	1.84906
			2015-12-01	18351.2	100.253	183.049	2.08707
			2016-01-01	18359.4	100.23	183.173	1.83731
			2016-02-01	18323.2	100.462	182.39	0.753864
			2016-03-01	18544.8	100.693	184.171	2.1397
			2016-04-01	18632.9	100.925	184.621	1.60112
			2016-05-01	18607.4	101.039	184.161	1.25734
			2016-06-01	18681.9	101.153	184.69	1.13008
			2016-07-01	18672.2	101.267	184.386	1.11044
			2016-08-01	18820.7	101.432	185.549	1.60441
			2016-09-01	18906	101.598	186.087	1.49243
			2016-10-01	18852.2	101.763	185.256	1.05079
			2016-11-01	19018.2	101.935	186.571	2.09843
			2016-12-01	19067.4	102.108	186.738	2.01539
			2017-01-01	19090.1	102.28	186.646	1.89601
			2017-02-01	19132.3	102.385	186.866	2.45412
			2017-03-01	19265.3	102.49	187.972	2.0635
			2017-04-01	19213.8	102.596	187.277	1.43833
			2017-05-01	19383.4	102.765	188.618	2.42004
			2017-06-01	19480.2	102.935	189.248	2.46818
			2017-07-01	19477.3	103.104	188.909	2.45273
			2017-08-01	19594.2	103.336	189.618	2.19261
			2017-09-01	19692.6	103.567	190.144	2.18026
			2017-10-01	19712.5	103.798	189.913	2.51375
			2017-11-01	19866.7	104.002	191.023	2.38597
			2017-12-01	19916.3	104.205	191.126	2.34939
			2018-01-01	19988.9	104.409	191.448	2.57278
			2018-02-01	20051.7	104.708	191.501	2.48056
			2018-03-01	20082.5	105.007	191.249	1.7435
			2018-04-01	20279.4	105.306	192.575	2.82919
			2018-05-01	20457.5	105.446	194.01	2.85882
			2018-06-01	20499.1	105.585	194.148	2.58892
			2018-07-01	20636.6	105.725	195.192	3.32587
			2018-08-01	20638.5	105.893	194.9	2.78591
			2018-09-01	20677.8	106.06	194.963	2.53399
			2018-10-01	20777.4	106.228	195.593	2.99093
