# Supplementary material for: Optimal Macroeconomic Policy in Nonlinear Models: A VSTAR Perspective
Source: publisher site journal article supplement (doi:10.1515/snde-2024-0100), 2025-10-08
Supplement: Supplementary file 40 [file AlternativreOptimizationResults.xlsx]

## Sheet: ModelPredControlResuls
VSTAR - 1pa forecast Model Predictive Control -post 2008 based on inflation target equal topost 2008											VSTAR - 1pa forecast Nonlinear Numerical Control -post 2008 based on inflation target equal topost 2008											VAR - 1pa forecast post 2008 based on inflation target equal topost 2008
	Terms in the loss function					Loss	Stabilization					Terms in the loss function					Loss	Stabilization					Terms in the loss function					Loss	Stabilization
	p	u	DR	DTS	DPS		Gain	unem eq				p	u	DR	DTS	DPS		Gain	unem eq				p	u	DR	DTS	DPS		Gain	unem eq
Policy	Benchmark										Policy	Benchmark										Policy	Benchmark
Act-Policy	1.23656	5.46192	0.0223792	0.0506605	0.376523	7.14804					Act-Policy	1.23656	5.46192	0.0223792	0.0506605	0.376523	7.14804					Act-Policy	1.23656	5.46192	0.0223792	0.0506605	0.376523	7.14804
Opt-Policy	1.13611	5.44365	0.0822372	0.0503779	0.376024	7.0884	0.834409	0.244221			Opt-Policy	1.13611	5.44365	0.0752833	0.050378	0.376023	7.08144	0.931693	0.258065			Opt-Policy	1.03477	5.13494	0.0476103	0.0446631	0.305557	6.56754	8.1212	0.76191
	vp=0.5											vp=0.5											vp=0.5
Act-Policy	1.23656	5.46192	0.0223792	0.0506605	0.376523	6.52976					Act-Policy	1.23656	5.46192	0.0223792	0.0506605	0.376523	6.52976					Act-Policy	1.23656	5.46192	0.0223792	0.0506605	0.376523	6.52976
Opt-Policy	1.13611	5.44365	0.0822372	0.0503778	0.376024	6.52034	0.144207	0.0970381			Opt-Policy	1.13611	5.44365	0.0752833	0.050378	0.376023	6.51339	0.250704	0.127947			Opt-Policy	1.11368	5.15108	0.0408479	0.0447662	0.281136	6.07467	6.96955	0.674607
	vug=0.5											vug=0.5											vug=0.5
Act-Policy	1.23656	5.46192	0.0223792	0.0506605	0.376523	4.41708					Act-Policy	1.23656	5.46192	0.0223792	0.0506605	0.376523	4.41708					Act-Policy	1.23656	5.46192	0.0223792	0.0506605	0.376523	4.41708
Opt-Policy	1.13611	5.44365	0.0822372	0.0503778	0.376024	4.36657	1.14355	0.317841			Opt-Policy	1.13611	5.44365	0.0752833	0.050378	0.376023	4.35962	1.30098	0.339015			Opt-Policy	1.01705	5.23909	0.0409818	0.0441101	0.313669	4.03536	8.64207	0.873759
	Dv R,TS,PS=0.5											Dv R,TS,PS=0.5											Dv R,TS,PS=0.5
Act-Policy	1.23656	5.46192	0.0223792	0.0506605	0.376523	6.92326					Act-Policy	1.23656	5.46192	0.0223792	0.0506605	0.376523	6.92326					Act-Policy	1.23656	5.46192	0.0223792	0.0506605	0.376523	6.92326
Opt-Policy	1.13611	5.44365	0.0822372	0.0503778	0.376024	6.83408	1.28815	0.298633			Opt-Policy	1.13611	5.44365	0.0752833	0.050378	0.376023	6.8306	1.33837	0.304399			Opt-Policy	0.961744	4.96755	0.0661182	0.0482944	0.358045	6.16552	10.9448	0.870481
	Dv TS,PS=0.5											Dv TS,PS=0.5											Dv TS,PS=0.5
Act-Policy	1.23656	5.46192	0.0223792	0.0506605	0.376523	6.93445					Act-Policy	1.23656	5.46192	0.0223792	0.0506605	0.376523	6.93445					Act-Policy	1.23656	5.46192	0.0223792	0.0506605	0.376523	6.93445
Opt-Policy	1.13611	5.44365	0.0813408	0.050378	0.376023	6.8743	0.867398	0.245254			Opt-Policy	1.13611	5.44365	0.0752833	0.050378	0.376023	6.86824	0.95475	0.257307			Opt-Policy	0.95924	5.11543	0.0403246	0.0506807	0.363953	6.32232	8.82745	0.782391
	Dv R=0.5											Dv R=0.5											Dv R=0.5
Act-Policy	1.23656	5.46192	0.0223792	0.0506605	0.376523	7.13685					Act-Policy	1.23656	5.46192	0.0223792	0.0506605	0.376523	7.13685					Act-Policy	1.23656	5.46192	0.0223792	0.0506605	0.376523	7.13685
Opt-Policy	1.13611	5.44365	0.0794716	0.050378	0.376023	7.0459	1.27445	0.301589			Opt-Policy	1.13611	5.44365	0.0752833	0.050378	0.376023	7.0438	1.30379	0.305041			Opt-Policy	1.04018	4.98648	0.077526	0.0454444	0.302699	6.41357	10.1345	0.850459
	AVERAGE											AVERAGE											AVERAGE
Act-Policy	1.23656	5.46192	0.0223792	0.0506605	0.376523	6.51491					Act-Policy	1.23656	5.46192	0.0223792	0.0506605	0.376523	6.51491					Act-Policy	1.23656	5.46192	0.0223792	0.0506605	0.376523	6.51491
Opt-Policy	1.13611	5.44365	0.0816269	0.0503779	0.376024	6.45493	0.925361	0.250763			Opt-Policy	1.13611	5.44365	0.0752833	0.050378	0.376023	6.44952	1.01338	0.265296			Opt-Policy	1.02111	5.09909	0.0522348	0.0463265	0.320843	5.92983	8.93992	0.802268
VSTAR - 1pa forecast Model Predictive Control full sample based on inflation target equal to sample average											VSTAR - 1pa forecast Nonlinear Numerical Control full sample based on inflation target equal to sample average											VAR - 1pa forecast full sample based on inflation target equal to sample average											VSTAR - 1pa forecast full sample based on inflation target equal to sample average
	Terms in the loss function					Loss	Stabilization					Terms in the loss function					Loss	Stabilization					Terms in the loss function					Loss	Stabilization					Terms in the loss function					Loss	Stabilization
	p	u	DR	DTS	DPS		Gain	unem eq				p	u	DR	DTS	DPS		Gain	unem eq				p	u	DR	DTS	DPS		Gain	unem eq				p	u	DR	DTS	DPS		Gain	unem eq
Policy	Benchmark										Benchmark											Benchmark											Benchmark
Act-Policy	6.51748	2.65521	0.319868	0.019123	0.106717	9.6184					Act-Policy	6.51748	2.65521	0.319868	0.019123	0.106717	9.6184					Act-Policy	6.51748	2.65521	0.319868	0.019123	0.106717	9.6184					Act-Policy	6.51748	2.65521	0.319868	0.019123	0.106717	9.6184
Opt-Policy	6.34829	2.64037	0.300593	0.019123	0.106716	9.41509	2.11371	0.450893			Opt-Policy	6.34829	2.64037	0.457393	0.019123	0.106716	9.57189	0.483503	0.215651			Opt-Policy	5.59074	2.46076	0.308986	0.0214181	0.190575	8.57248	10.8742	1.0227			Opt-Policy	4.79839	2.47236	0.363209	0.151839	0.219744	8.00554	16.7685	1.26998
	vp=0.5											vp=0.5											vp=0.5											vp=0.5
Act-Policy	6.51748	2.65521	0.319868	0.019123	0.106717	6.35966					Act-Policy	6.51748	2.65521	0.319868	0.019123	0.106717	6.35966					Act-Policy	6.51748	2.65521	0.319868	0.019123	0.106717	6.35966					Act-Policy	6.51748	2.65521	0.319868	0.019123	0.106717	6.35966
Opt-Policy	6.34829	2.64037	0.300593	0.0191229	0.106716	6.24095	1.86663	0.344545			Opt-Policy	6.34829	2.64037	0.457393	0.019123	0.106716	6.39774	-0.598909	#NUM!			Opt-Policy	6.07164	2.47184	0.302847	0.0223036	0.131073	5.96388	6.22318	0.629105			Opt-Policy	5.24781	2.3957	0.353989	0.105257	0.171291	5.65014	11.1565	0.842329
	vug=0.5											vug=0.5											vug=0.5											vug=0.5
Act-Policy	6.51748	2.65521	0.319868	0.019123	0.106717	8.29079					Act-Policy	6.51748	2.65521	0.319868	0.019123	0.106717	8.29079					Act-Policy	6.51748	2.65521	0.319868	0.019123	0.106717	8.29079					Act-Policy	6.51748	2.65521	0.319868	0.019123	0.106717	5.03205
Opt-Policy	6.34829	2.64037	0.300593	0.0191229	0.106716	8.09491	2.36267	0.625914			Opt-Policy	6.34829	2.64037	0.457393	0.019123	0.106716	8.25171	0.471422	0.279588			Opt-Policy	5.4027	2.51933	0.303523	0.0191137	0.196072	7.18108	13.3849	1.48978			Opt-Policy	5.19885	2.52121	0.353893	0.0982777	0.167144	4.47935	10.9837	1.05139
	Dv R,TS,PS=0.5											Dv R,TS,PS=0.5											Dv R,TS,PS=0.5											Dv R,TS,PS=0.5
Act-Policy	6.51748	2.65521	0.319868	0.019123	0.106717	9.39554					Act-Policy	6.51748	2.65521	0.319868	0.019123	0.106717	9.39554					Act-Policy	6.51748	2.65521	0.319868	0.019123	0.106717	9.39554					Act-Policy	6.51748	2.65521	0.319868	0.019123	0.106717	9.39554
Opt-Policy	6.34829	2.64037	0.300593	0.0191229	0.106716	9.20188	2.06126	0.440076			Opt-Policy	6.34829	2.64037	0.457393	0.019123	0.106716	9.28028	1.22683	0.33951			Opt-Policy	5.17655	2.37042	0.326783	0.0257957	0.304115	7.87531	16.1803	1.23298			Opt-Policy	4.33463	2.40348	0.379693	0.236666	0.317815	7.2052	23.3126	1.47998
	Dv TS,PS=0.5											Dv TS,PS=0.5											Dv TS,PS=0.5											Dv TS,PS=0.5
Act-Policy	6.51748	2.65521	0.319868	0.019123	0.106717	9.55548					Act-Policy	6.51748	2.65521	0.319868	0.019123	0.106717	9.55548					Act-Policy	6.51748	2.65521	0.319868	0.019123	0.106717	9.55548					Act-Policy	6.51748	2.65521	0.319868	0.019123	0.106717	9.55548
Opt-Policy	6.34829	2.64037	0.310087	0.019123	0.106716	9.36167	2.02826	0.440238			Opt-Policy	6.34829	2.64037	0.457393	0.019123	0.106716	9.50897	0.486679	0.215649			Opt-Policy	5.16579	2.4558	0.306324	0.0324905	0.313178	8.10075	15.224	1.20612			Opt-Policy	4.36828	2.4248	0.355785	0.238979	0.329488	7.43309	22.2112	1.45684
	Dv R=0.5											Dv R=0.5											Dv R=0.5											Dv R=0.5
Act-Policy	6.51748	2.65521	0.319868	0.019123	0.106717	9.45846					Act-Policy	6.51748	2.65521	0.319868	0.019123	0.106717	9.45846					Act-Policy	6.51748	2.65521	0.319868	0.019123	0.106717	9.45846					Act-Policy	6.51748	2.65521	0.319868	0.019123	0.106717	9.45846
Opt-Policy	6.34829	2.64037	0.299571	0.019123	0.106716	9.26428	2.05296	0.440657			Opt-Policy	6.34829	2.64037	0.457393	0.019123	0.106716	9.3432	1.21867	0.339511			Opt-Policy	5.62664	2.3736	0.336191	0.0205216	0.185876	8.37473	11.4578	1.04102			Opt-Policy	4.75232	2.45635	0.388612	0.151199	0.213359	7.76753	17.8774	1.30036
	AVERAGE											AVERAGE											AVERAGE											AVERAGE
Act-Policy	6.51748	2.65521	0.319868	0.019123	0.106717	8.77972					Act-Policy	6.51748	2.65521	0.319868	0.019123	0.106717	8.77972					Act-Policy	6.51748	2.65521	0.319868	0.019123	0.106717	8.77972					Act-Policy	6.51748	2.65521	0.319868	0.019123	0.106717	8.2366
Opt-Policy	6.34829	2.64037	0.302005	0.019123	0.106716	8.59646	2.08091	0.457054			Opt-Policy	6.34829	2.64037	0.457393	0.019123	0.106716	8.72563	0.548032	#NUM!			Opt-Policy	5.50568	2.44196	0.314109	0.0236072	0.220148	7.67804	12.2241	1.10362			Opt-Policy	4.78338	2.44565	0.365863	0.163703	0.236473	6.75681	17.0517	1.23348
