# Supplementary material for: Optimal Macroeconomic Policy in Nonlinear Models: A VSTAR Perspective
Source: publisher site journal article supplement (doi:10.1515/snde-2024-0100), 2025-10-08
Supplement: Supplementary file 50 [file PCEPI.xls]

## Sheet: FRED Graph
FRED Graph Observations
Federal Reserve Economic Data
Link: https://fred.stlouisfed.org
Help: https://fredhelp.stlouisfed.org
Economic Research Division
Federal Reserve Bank of St. Louis
PCEPI_PC1	Personal Consumption Expenditures: Chain-type Price Index, Percent Change from Year Ago, Monthly, Seasonally Adjusted
Frequency: Monthly
observation_date	PCEPI_PC1
1978-01-01	6.59948
1978-02-01	6.26302
1978-03-01	6.41663
1978-04-01	6.60473
1978-05-01	6.82377
1978-06-01	6.92392
1978-07-01	6.95359
1978-08-01	6.99596
1978-09-01	7.20188
1978-10-01	7.55368
1978-11-01	7.54717
1978-12-01	7.52911
1979-01-01	7.70303
1979-02-01	7.77908
1979-03-01	7.92076
1979-04-01	8.22403
1979-05-01	8.57033
1979-06-01	8.75535
1979-07-01	8.98771
1979-08-01	9.27066
1979-09-01	9.61083
1979-10-01	9.63252
1979-11-01	9.76874
1979-12-01	10.1769
1980-01-01	10.4974
1980-02-01	11.1021
1980-03-01	11.5937
1980-04-01	11.0207
1980-05-01	10.7363
1980-06-01	10.5245
1980-07-01	10.5384
1980-08-01	10.6125
1980-09-01	10.6593
1980-10-01	10.6464
1980-11-01	10.7779
1980-12-01	10.5671
1981-01-01	10.4728
1981-02-01	10.3932
1981-03-01	9.81436
1981-04-01	9.72126
1981-05-01	9.36379
1981-06-01	9.10977
1981-07-01	8.92334
1981-08-01	8.69826
1981-09-01	8.35436
1981-10-01	7.97856
1981-11-01	7.68222
1981-12-01	7.31855
1982-01-01	6.9285
1982-02-01	6.17456
1982-03-01	5.71267
1982-04-01	5.3065
1982-05-01	5.45573
1982-06-01	5.80102
1982-07-01	5.78843
1982-08-01	5.45856
1982-09-01	5.11379
1982-10-01	5.22852
1982-11-01	4.97868
1982-12-01	4.81374
1983-01-01	4.68184
1983-02-01	4.54536
1983-03-01	4.41148
1983-04-01	4.83342
1983-05-01	4.51322
1983-06-01	4.14658
1983-07-01	4.11587
1983-08-01	4.23931
1983-09-01	4.3133
1983-10-01	3.9089
1983-11-01	3.74391
1983-12-01	3.64517
1984-01-01	3.61173
1984-02-01	4.13189
1984-03-01	4.34006
1984-04-01	4.2611
1984-05-01	4.09619
1984-06-01	3.89418
1984-07-01	3.68262
1984-08-01	3.55628
1984-09-01	3.33761
1984-10-01	3.40386
1984-11-01	3.4031
1984-12-01	3.63673
1985-01-01	3.70444
1985-02-01	3.49021
1985-03-01	3.55351
1985-04-01	3.31269
1985-05-01	3.42796
1985-06-01	3.52348
1985-07-01	3.40772
1985-08-01	3.43221
1985-09-01	3.46633
1985-10-01	3.39432
1985-11-01	3.54991
1985-12-01	3.60733
1986-01-01	3.56445
1986-02-01	3.08637
1986-03-01	2.46062
1986-04-01	2.10033
1986-05-01	2.04615
1986-06-01	2.14822
1986-07-01	1.92453
1986-08-01	1.71547
1986-09-01	1.87559
1986-10-01	1.8893
1986-11-01	1.77566
1986-12-01	1.57078
1987-01-01	1.5784
1987-02-01	1.93553
1987-03-01	2.42749
1987-04-01	3.02157
1987-05-01	3.09393
1987-06-01	3.10282
1987-07-01	3.31264
1987-08-01	3.5908
1987-09-01	3.60118
1987-10-01	3.74341
1987-11-01	3.75692
1987-12-01	3.80673
1988-01-01	3.72712
1988-02-01	3.51438
1988-03-01	3.5993
1988-04-01	3.7158
1988-05-01	3.75315
1988-06-01	3.80169
1988-07-01	4.0666
1988-08-01	3.96509
1988-09-01	4.12044
1988-10-01	4.12862
1988-11-01	4.17197
1988-12-01	4.30536
1989-01-01	4.43266
1989-02-01	4.62788
1989-03-01	4.65563
1989-04-01	4.84356
1989-05-01	4.92144
1989-06-01	4.70542
1989-07-01	4.44899
1989-08-01	4.15139
1989-09-01	3.87724
1989-10-01	3.94453
1989-11-01	3.93028
1989-12-01	3.90622
1990-01-01	4.16043
1990-02-01	4.27233
1990-03-01	4.27653
1990-04-01	3.80366
1990-05-01	3.65926
1990-06-01	3.88871
1990-07-01	3.89754
1990-08-01	4.57649
1990-09-01	4.9849
1990-10-01	5.17478
1990-11-01	5.07863
1990-12-01	4.87368
1991-01-01	4.48021
1991-02-01	4.07478
1991-03-01	3.7056
1991-04-01	3.67707
1991-05-01	3.87289
1991-06-01	3.59076
1991-07-01	3.49797
1991-08-01	3.05171
1991-09-01	2.77669
1991-10-01	2.38314
1991-11-01	2.47791
1991-12-01	2.63848
1992-01-01	2.38897
1992-02-01	2.59626
1992-03-01	2.82427
1992-04-01	2.9147
1992-05-01	2.62483
1992-06-01	2.6342
1992-07-01	2.81059
1992-08-01	2.711
1992-09-01	2.52521
1992-10-01	2.69511
1992-11-01	2.67101
1992-12-01	2.59332
1993-01-01	2.7045
1993-02-01	2.5983
1993-03-01	2.56048
1993-04-01	2.55508
1993-05-01	2.73719
1993-06-01	2.59048
1993-07-01	2.41529
1993-08-01	2.45367
1993-09-01	2.39328
1993-10-01	2.35381
1993-11-01	2.34624
1993-12-01	2.19191
1994-01-01	1.97643
1994-02-01	2.06004
1994-03-01	2.13196
1994-04-01	1.98175
1994-05-01	1.81403
1994-06-01	2.02733
1994-07-01	2.18686
1994-08-01	2.2455
1994-09-01	2.2533
1994-10-01	2.10467
1994-11-01	2.10646
1994-12-01	2.14922
1995-01-01	2.32143
1995-02-01	2.26574
1995-03-01	2.17204
1995-04-01	2.32129
1995-05-01	2.3308
1995-06-01	2.18105
1995-07-01	1.98649
1995-08-01	1.97344
1995-09-01	1.92872
1995-10-01	2.02167
1995-11-01	1.82437
1995-12-01	1.95301
1996-01-01	1.97443
1996-02-01	1.95406
1996-03-01	2.07395
1996-04-01	2.11048
1996-05-01	2.12959
1996-06-01	2.02839
1996-07-01	2.1179
1996-08-01	1.99368
1996-09-01	2.212
1996-10-01	2.25618
1996-11-01	2.44068
1996-12-01	2.36266
1997-01-01	2.26764
1997-02-01	2.32199
1997-03-01	2.12117
1997-04-01	1.91609
1997-05-01	1.6925
1997-06-01	1.82525
1997-07-01	1.66983
1997-08-01	1.65598
1997-09-01	1.61459
1997-10-01	1.43884
1997-11-01	1.26301
1997-12-01	1.12499
1998-01-01	1.04386
1998-02-01	0.78024
1998-03-01	0.69057
1998-04-01	0.71545
1998-05-01	0.90146
1998-06-01	0.68664
1998-07-01	0.87559
1998-08-01	0.93393
1998-09-01	0.63183
1998-10-01	0.72192
1998-11-01	0.72322
1998-12-01	0.84506
1999-01-01	0.93819
1999-02-01	0.93198
1999-03-01	0.99199
1999-04-01	1.3553
1999-05-01	1.28144
1999-06-01	1.39862
1999-07-01	1.41781
1999-08-01	1.46105
1999-09-01	1.88491
1999-10-01	1.83433
1999-11-01	1.9205
1999-12-01	2.05516
2000-01-01	2.18862
2000-02-01	2.56743
2000-03-01	2.93086
2000-04-01	2.35028
2000-05-01	2.36982
2000-06-01	2.68495
2000-07-01	2.66864
2000-08-01	2.47645
2000-09-01	2.54854
2000-10-01	2.51424
2000-11-01	2.56537
2000-12-01	2.48538
2001-01-01	2.70148
2001-02-01	2.53933
2001-03-01	2.10919
2001-04-01	2.37354
2001-05-01	2.55675
2001-06-01	2.39173
2001-07-01	2.10193
2001-08-01	2.09567
2001-09-01	1.3139
2001-10-01	1.53207
2001-11-01	1.3217
2001-12-01	1.06233
2002-01-01	0.66612
2002-02-01	0.67768
2002-03-01	0.94338
2002-04-01	1.18817
2002-05-01	0.98817
2002-06-01	0.93509
2002-07-01	1.19212
2002-08-01	1.40392
2002-09-01	1.93272
2002-10-01	1.75939
2002-11-01	1.92975
2002-12-01	2.13244
2003-01-01	2.34482
2003-02-01	2.60616
2003-03-01	2.58909
2003-04-01	1.98934
2003-05-01	1.80676
2003-06-01	1.78837
2003-07-01	1.86239
2003-08-01	2.00571
2003-09-01	2.1414
2003-10-01	1.96894
2003-11-01	1.99648
2003-12-01	2.12353
2004-01-01	2.21273
2004-02-01	1.99978
2004-03-01	1.89616
2004-04-01	2.25877
2004-05-01	2.70778
2004-06-01	2.89129
2004-07-01	2.68481
2004-08-01	2.39245
2004-09-01	2.27273
2004-10-01	2.69967
2004-11-01	2.96503
2004-12-01	2.79375
2005-01-01	2.53262
2005-02-01	2.59896
2005-03-01	2.74774
2005-04-01	2.8439
2005-05-01	2.56989
2005-06-01	2.33993
2005-07-01	2.67968
2005-08-01	3.04012
2005-09-01	3.83077
2005-10-01	3.55116
2005-11-01	2.93935
2005-12-01	2.88395
2006-01-01	3.24706
2006-02-01	3.0225
2006-03-01	2.91357
2006-04-01	3.10237
2006-05-01	3.32176
2006-06-01	3.51295
2006-07-01	3.42781
2006-08-01	3.33601
2006-09-01	2.08113
2006-10-01	1.67724
2006-11-01	1.92408
2006-12-01	2.28684
2007-01-01	2.13322
2007-02-01	2.38868
2007-03-01	2.56581
2007-04-01	2.33149
2007-05-01	2.35323
2007-06-01	2.31726
2007-07-01	2.12444
2007-08-01	1.87347
2007-09-01	2.53418
2007-10-01	3.08932
2007-11-01	3.59924
2007-12-01	3.47197
2008-01-01	3.3884
2008-02-01	3.27298
2008-03-01	3.19059
2008-04-01	3.1403
2008-05-01	3.28228
2008-06-01	3.81178
2008-07-01	4.1354
2008-08-01	3.98108
2008-09-01	3.66714
2008-10-01	2.67195
2008-11-01	0.92617
2008-12-01	0.12893
2009-01-01	-0.11146
2009-02-01	-0.13156
2009-03-01	-0.52581
2009-04-01	-0.56742
2009-05-01	-0.88936
2009-06-01	-1.01872
2009-07-01	-1.46654
2009-08-01	-1.10079
2009-09-01	-1.02236
2009-10-01	0.01265
2009-11-01	1.45973
2009-12-01	2.09031
2010-01-01	2.30143
2010-02-01	2.11633
2010-03-01	2.37276
2010-04-01	2.28156
2010-05-01	2.20753
2010-06-01	1.56189
2010-07-01	1.63826
2010-08-01	1.483
2010-09-01	1.41921
2010-10-01	1.35798
2010-11-01	1.30727
2010-12-01	1.47677
2011-01-01	1.55955
2011-02-01	1.84593
2011-03-01	2.11144
2011-04-01	2.48712
2011-05-01	2.76679
2011-06-01	2.78889
2011-07-01	2.8754
2011-08-01	2.97592
2011-09-01	3.01889
2011-10-01	2.69413
2011-11-01	2.70018
2011-12-01	2.52628
2012-01-01	2.56932
2012-02-01	2.51274
2012-03-01	2.2965
2012-04-01	1.99984
2012-05-01	1.57628
2012-06-01	1.54605
2012-07-01	1.41023
2012-08-01	1.51242
2012-09-01	1.67742
2012-10-01	1.97721
2012-11-01	1.69922
2012-12-01	1.62552
2013-01-01	1.47398
2013-02-01	1.61836
2013-03-01	1.29142
2013-04-01	1.07945
2013-05-01	1.2591
2013-06-01	1.52852
2013-07-01	1.61821
2013-08-01	1.43392
2013-09-01	1.16658
2013-10-01	1.03797
2013-11-01	1.2643
2013-12-01	1.48221
2014-01-01	1.47936
2014-02-01	1.16849
2014-03-01	1.50461
2014-04-01	1.78119
2014-05-01	1.88991
2014-06-01	1.78508
2014-07-01	1.81147
2014-08-01	1.6422
2014-09-01	1.62777
2014-10-01	1.43037
2014-11-01	1.19453
2014-12-01	0.83853
2015-01-01	0.18284
2015-02-01	0.28924
2015-03-01	0.28086
2015-04-01	0.16352
2015-05-01	0.23028
2015-06-01	0.31154
2015-07-01	0.24324
2015-08-01	0.25684
2015-09-01	0.08333
2015-10-01	0.09401
2015-11-01	0.23182
2015-12-01	0.30406
2016-01-01	0.82077
2016-02-01	0.5924
2016-03-01	0.63211
2016-04-01	0.88718
2016-05-01	0.79588
2016-06-01	0.79241
2016-07-01	0.75115
2016-08-01	0.90099
2016-09-01	1.22569
2016-10-01	1.46407
2016-11-01	1.44092
2016-12-01	1.70842
2017-01-01	2.03667
2017-02-01	2.18903
2017-03-01	1.90083
2017-04-01	1.83871
2017-05-01	1.65998
2017-06-01	1.57715
2017-07-01	1.56019
2017-08-01	1.62876
2017-09-01	1.87939
2017-10-01	1.81895
2017-11-01	1.95944
2017-12-01	1.8835
2018-01-01	1.84423
2018-02-01	1.96394
2018-03-01	2.17738
2018-04-01	2.15261
2018-05-01	2.36512
2018-06-01	2.38428
2018-07-01	2.44038
2018-08-01	2.2786
2018-09-01	2.06534
2018-10-01	2.11356
2018-11-01	2.00505
2018-12-01	1.86457
2019-01-01	1.46804
2019-02-01	1.35906
2019-03-01	1.47479
2019-04-01	1.62118
2019-05-01	1.50088
2019-06-01	1.45744
2019-07-01	1.51899
2019-08-01	1.51349
2019-09-01	1.37509
2019-10-01	1.40619
2019-11-01	1.41713
2019-12-01	1.65061
2020-01-01	1.90214
2020-02-01	1.86636
2020-03-01	1.3436
2020-04-01	0.41363
2020-05-01	0.50807
2020-06-01	0.90793
2020-07-01	1.04203
2020-08-01	1.29843
2020-09-01	1.38003
2020-10-01	1.17307
2020-11-01	1.1052
2020-12-01	1.29164
2021-01-01	1.41259
2021-02-01	1.62689
2021-03-01	2.45122
2021-04-01	3.58215
2021-05-01	3.96974
2021-06-01	4.03
2021-07-01	4.15929
2021-08-01	4.23707
2021-09-01	4.43635
2021-10-01	5.10848
2021-11-01	5.73486
