# Supplementary material for: Optimal Macroeconomic Policy in Nonlinear Models: A VSTAR Perspective
Source: publisher site journal article supplement (doi:10.1515/snde-2024-0100), 2025-10-08
Supplement: Supplementary file 56 [file JAEEstimationResults.xlsx]

## Sheet: LagSelection
No. of lags	Log lik	Nvars	Nstates	Npara	Depnobs	AIC	HIC	SIC	aic	hq	bic
1	0.885978	7	4	340	464	-0.306439	0.887674	2.7271	1.4617	2.65581	4.49523
2	1.2599	7	4	536	457	-0.174075	1.73143	4.66363	2.34022	4.24572	7.17792
3	2.3169	7	4	732	450	-1.38046	1.2541	5.30392	3.24304	5.8776	9.92741
4	1.02333	7	4	928	443	2.14296	5.52496	10.7182	4.185	7.567	12.7602
5	3.25936	7	4	1124	436	-1.36276	2.78581	9.14933	5.14101	9.28959	15.6531
6	1.40928	7	4	1320	429	3.33528	8.27036	15.8321	6.14728	11.0824	18.6441
7	0.635002	7	4	1516	422	5.91483	11.6572	20.4462	7.18182	12.9242	21.7132
8	-0.535746	7	4	1712	415	9.32209	15.8934	25.94	8.25318	14.8245	24.871
9	-0.93713	7	4	1908	408	11.2272	18.65	29.9858	9.35753	16.7804	28.1161
10	0.693928	7	4	2104	401	9.10591	17.4039	30.0618	10.4903	18.7883	31.4462
11	0.56404	7	4	2300	394	10.547	19.7448	33.7592	11.6723	20.87	34.8845
12	0.9236	7	4	2496	387	11.052	21.1754	36.5823	12.8945	23.0178	38.4248

## Sheet: Table
No. of lags	Log lik	AIC	HIC	SIC	AIC*	HIC*	SIC*
1	0.885978	-0.306439	0.887674	2.7271	1.4617	2.65581	4.49523
2	1.2599	-0.174075	1.73143	4.66363	2.34022	4.24572	7.17792
3	2.3169	-1.38046	1.2541	5.30392	3.24304	5.8776	9.92741
4	1.02333	2.14296	5.52496	10.7182	4.185	7.567	12.7602
5	3.25936	-1.36276	2.78581	9.14933	5.14101	9.28959	15.6531
6	1.40928	3.33528	8.27036	15.8321	6.14728	11.0824	18.6441
7	0.635002	5.91483	11.6572	20.4462	7.18182	12.9242	21.7132
8	-0.535746	9.32209	15.8934	25.94	8.25318	14.8245	24.871
9	-0.93713	11.2272	18.65	29.9858	9.35753	16.7804	28.1161
10	0.693928	9.10591	17.4039	30.0618	10.4903	18.7883	31.4462
11	0.56404	10.547	19.7448	33.7592	11.6723	20.87	34.8845
12	0.9236	11.052	21.1754	36.5823	12.8945	23.0178	38.4248
