# Supplementary material for: Optimal Macroeconomic Policy in Nonlinear Models: A VSTAR Perspective
Source: publisher site journal article supplement (doi:10.1515/snde-2024-0100), 2025-10-08
Supplement: Supplementary file 92 [file Dispersion_1.xlsx]

## Sheet: NGDP
Measures of Cross-Sectional Dispersion for Quarterly Forecasts for NOMINAL GROSS DOMESTIC PRODUCT (NGDP)
Units: SAAR, Bil. $
Dispersion Measure D1 = 75th Percentile Minus 25th Percentile of the Forecasts for Levels
P25 = 25th Percentile of the Forecasts for Levels
P75 = 75th Percentile of the Forecasts for Levels
At Each Survey Date T, the Quarterly Horizons Are T, T+1, T+2, T+3, and T+4
Survey_Date(T)	NGDP_P25_D1(T)	NGDP_P75_D1(T)	NGDP_D1(T)	NGDP_P25_D1(T+1)	NGDP_P75_D1(T+1)	NGDP_D1(T+1)	NGDP_P25_D1(T+2)	NGDP_P75_D1(T+2)	NGDP_D1(T+2)	NGDP_P25_D1(T+3)	NGDP_P75_D1(T+3)	NGDP_D1(T+3)	NGDP_P25_D1(T+4)	NGDP_P75_D1(T+4)	NGDP_D1(T+4)
1968Q4	883	886	3	893	900	7	904	914	10	919	930	11	935	947	12
1969Q1	898	903	5	908	915	7	924	930	6	936	947	11	#N/A	#N/A	#N/A
1969Q2	916	919	3	928	934	6	938	946	8	950.5	961.5	11	#N/A	#N/A	#N/A
1969Q3	937	941	4	947	955	8	955	967	12	966	981	15	#N/A	#N/A	#N/A
1969Q4	953	956	3	960	967	7	968	980	12	981	995	14	996	1015	19
1970Q1	960	964	4	969	975	6	981	990	9	996	1010	14	#N/A	#N/A	#N/A
1970Q2	970	973	3	981	990	9	998	1007	9	1012	1025	13	1030	1045	15
1970Q3	982	987	5	995	1003	8	1011	1020	9	1028	1037	9	1044	1055	11
1970Q4	990	995	5	1012	1020	8	1030	1040	10	1049	1058	9	1065	1078	13
1971Q1	1014	1020	6	1033	1043	10	1050	1058	8	1069	1081	12	1090	1105	15
1971Q2	1038	1043	5	1054	1059	5	1074	1082	8	1099	1109	10	1122	1135	13
1971Q3	1078	1085	7	1100	1110	10	1125	1137	12	1149	1162	13	1172	1191	19
1971Q4	1079	1084	5	1103.5	1110	6.5	1127	1136	9	1150	1163.5	13.5	1176.5	1190	13.5
1972Q1	1097	1103	6	1123	1131	8	1148	1158	10	1171	1185	14	1195	1212	17
1972Q2	1129	1134	5	1155	1163	8	1180	1190	10	1204	1217	13	1229	1243	14
1972Q3	1163	1168	5	1189	1196	7	1216	1225	9	1241	1252	11	1264	1277	13
1972Q4	1190	1195	5	1218	1225	7	1244	1253	9	1269	1280	11	1294	1304	10
1973Q1	1225	1228	3	1252	1258	6	1275	1282	7	1298	1305	7	1320	1331	11
1973Q2	1262	1270	8	1286	1296	10	1309	1323	14	1330	1344	14	1350	1365	15
1973Q3	1318	1326	8	1335	1350	15	1351	1371	20	1371	1393	22	1395	1422	27
1973Q4	1327	1332	5	1342	1351	9	1357	1373	16	1378	1399	21	1401	1428	27
1974Q1	1347	1355	8	1368	1377	9	1393	1405	12	1422	1442	20	1447	1475	28
1974Q2	1373	1383	10	1400	1415	15	1430	1449	19	1460.5	1485.5	25	1491	1525	34
1974Q3	1409	1417	8	1436	1454	18	1462	1490	28	1489	1527	38	#N/A	#N/A	#N/A
1974Q4	1430	1440	10	1454	1468	14	1480	1500	20	1513	1539	26	1555	1583	28
1975Q1	1432	1445.5	13.5	1447.5	1477	29.5	1481.5	1516.5	35	1524	1560	36	1560	1604	44
1975Q2	1430	1444	14	1455	1483	28	1494	1530	36	1529	1572	43	1572	1620	48
1975Q3	1465	1482	17	1506	1530	24	1550	1580	30	1594	1626	32	1637	1675	38
1975Q4	1539.5	1546.5	7	1577	1595	18	1614.5	1640	25.5	1659	1688	29	1703.5	1740	36.5
1976Q1	1614	1620	6	1653	1669	16	1697	1718	21	1745	1770	25	1790	1820	30
1976Q2	1655	1664.5	9.5	1700	1713.5	13.5	1750	1765	15	1796.5	1815	18.5	1842	1861	19
1976Q3	1712.5	1720.5	8	1760	1770.5	10.5	1809	1820	11	1852	1872.5	20.5	1900	1924.5	24.5
1976Q4	1750	1759.5	9.5	1795	1810	15	1840	1859.5	19.5	1886	1910	24	1926.5	1964.5	38
1977Q1	1784	1793	9	1827	1850	23	1870	1905	35	1915	1960	45	1962	2018	56
1977Q2	1845	1854	9	1897	1911	14	1949.5	1969.5	20	1996.5	2023	26.5	2046.5	2075.5	29
1977Q3	1913	1924	11	1970	1981	11	2022	2034	12	2070	2085	15	2117.5	2140.5	23
1977Q4	1957	1966	9	2005	2019	14	2055	2070	15	2102	2125	23	2152	2175	23
1978Q1	2012	2020	8	2059	2075	16	2105	2126	21	2146	2185	39	2197	2235	38
1978Q2	2050	2070	20	2099.5	2125.5	26	2150.5	2182	31.5	2199	2235	36	2238.5	2288.5	50
1978Q3	2129	2139	10	2180	2195	15	2219	2253	34	2262	2304	42	2307	2356	49
1978Q4	2192	2205	13	2233	2264	31	2278	2320	42	2320	2364	44	2358	2418	60
1979Q1	2260	2274	14	2305	2330	25	2336	2373	37	2375	2413	38	2424	2456	32
1979Q2	2314	2331	17	2356	2377	21	2391	2422	31	2434	2469	35	2487	2531	44
1979Q3	2360	2374	14	2391	2411	20	2429	2461	32	2486	2523	37	2551.5	2598.5	47
1979Q4	2429	2443.5	14.5	2451	2472	21	2480	2510	30	2539	2571	32	2600	2658	58
1980Q1	2496	2525	29	2525	2568	43	2575	2613	38	2630	2681	51	2688.5	2760	71.5
1980Q2	2538	2560	22	2567	2600	33	2613	2650	37	2675	2725	50	2738.5	2809.5	71
1980Q3	2543	2559	16	2580	2610	30	2634	2691	57	2689	2775	86	2760	2865	105
1980Q4	2645	2667	22	2709	2741	32	2786	2827	41	2879	2917	38	2961	3011	50
1981Q1	2803	2820	17	2868	2891	23	2948	2985	37	3041	3090	49	3136.5	3193	56.5
1981Q2	2895	2915	20	2971.5	2997	25.5	3056.5	3087.5	31	3150	3179	29	3237.5	3275.5	38
1981Q3	2927	2940	13	2991	3023	32	3058	3120	62	3140	3212	72	3217	3306	89
1981Q4	2975	2990	15	3015	3053	38	3090	3134	44	3163	3238	75	3271	3333	62
1982Q1	3006	3025	19	3060	3102	42	3141	3190	49	3222	3288	66	3310	3370	60
1982Q2	3020	3040	20	3070	3127	57	3146	3206	60	3207	3274	67	3289	3355	66
1982Q3	3095	3114	19	3161	3186	25	3221	3255.5	34.5	3286	3332.5	46.5	3355	3418	63
1982Q4	3124	3148	24	3182	3215	33	3248	3294	46	3320	3376	56	3391	3460	69
1983Q1	3155	3165.5	10.5	3210	3229.5	19.5	3273.5	3316.5	43	3343	3405	62	3405	3481.5	76.5
1983Q2	3239	3252	13	3308	3338	30	3378.5	3415	36.5	3451	3500	49	3532	3589	57
1983Q3	3344	3366	22	3418.5	3451.5	33	3489	3527.5	38.5	3566.5	3606.5	40	3650.5	3689.5	39
1983Q4	3440.5	3454	13.5	3512.5	3540.5	28	3592	3627	35	3674.5	3712	37.5	3743.5	3796.5	53
1984Q1	3510	3523	13	3588	3606	18	3663	3686	23	3745	3771	26	3817	3855	38
1984Q2	3603	3620	17	3677	3698	21	3755	3783	28	3818	3863	45	3898	3951	53
1984Q3	3720	3732	12	3792	3816	24	3865	3898	33	3926	3977	51	3987	4055	68
1984Q4	3752	3769	17	3817	3846	29	3880	3928	48	3957	4007	50	4035	4088	53
1985Q1	3817	3833.5	16.5	3885.5	3905	19.5	3956.5	3988	31.5	4034	4055.5	21.5	4097	4153	56
1985Q2	3879	3890	11	3950	3974	24	4019	4060	41	4082	4148	66	4154	4222	68
1985Q3	3910	3924	14	3976	4001	25	4046	4083	37	4100	4157	57	4145	4239	94
1985Q4	3974	3987	13	4027	4060	33	4093	4129	36	4155	4200	45	4233	4274	41
1986Q1	4132	4145	13	4190	4216	26	4255	4295	40	4328	4372	44	4390	4444	54
1986Q2	4156.5	4172.5	16	4214	4244	30	4284	4326.5	42.5	4359.5	4402	42.5	4421	4475	54
1986Q3	4213.5	4233.5	20	4258	4293	35	4304	4367	63	4365.5	4449.5	84	4420	4515	95
1986Q4	4283	4298	15	4329	4366.5	37.5	4388.5	4431	42.5	4453	4506	53	4523	4581.5	58.5
1987Q1	4318	4333	15	4381	4404	23	4453	4483	30	4533	4578	45	4581	4650	69
1987Q2	4396	4414.5	18.5	4466	4489	23	4538	4570.5	32.5	4609.5	4653.5	44	4683.5	4730	46.5
1987Q3	4512	4527	15	4587	4621	34	4668	4701	33	4739	4795	56	4818	4864	46
1987Q4	4568.5	4590.5	22	4614	4664	50	4670	4736.5	66.5	4735	4807.5	72.5	4815.5	4885	69.5
1988Q1	4626	4660	34	4666	4718	52	4730	4812	82	4801	4895	94	4894	4971	77
1988Q2	4727	4753	26	4790	4820	30	4868	4899	31	4944	4985	41	5015	5084	69
1988Q3	4881	4896	15	4959	4980	21	5040	5077	37	5116	5160	44	5188	5255	67
1988Q4	4969	4986	17	5054	5104	50	5131	5201	70	5208	5293	85	5276	5351	75
1989Q1	5082	5103	21	5153	5194	41	5241	5276	35	5305	5354	49	5366	5442.5	76.5
1989Q2	5192.5	5204	11.5	5261	5291	30	5334	5385	51	5418	5470	52	5478	5570	92
1989Q3	5263	5278	15	5334	5373	39	5409.8	5470	60.2	5471	5563	92	5556	5664	108
1989Q4	5329	5351	22	5394	5436	42	5459	5528	69	5535	5623	88	5631	5723	92
1990Q1	5401	5411	10	5472	5515	43	5555	5608	53	5642	5686	44	5732	5790	58
1990Q2	5510	5539	29	5581	5628	47	5654	5713	59	5736	5811	75	5796	5895	99
1990Q3	5506	5535	29	5573	5607	34	5639	5693.4	54.4	5700.3	5792	91.7	5792.65	5889.3	96.65
1990Q4	5546.2	5580	33.8	5602.4	5628	25.6	5652	5700	48	5710.6	5785	74.4	5794	5890	96
1991Q1	5538.1	5579.8	41.7	5580	5645.5	65.5	5645	5729.5	84.5	5723	5814	91	5817.8	5895.6	77.8
1991Q2	5597	5620.3	23.3	5659	5702.4	43.4	5738	5786	48	5833.6	5890	56.4	5930	5992	62
1991Q3	5685	5705.2	20.2	5763.3	5798	34.7	5849	5893.8	44.8	5936	5987	51	6020.55	6095.5	74.95
1991Q4	5724.1	5739.3	15.2	5796.1	5822	25.9	5870.3	5914	43.7	5959	6005	46	6043	6102.1	59.1
1992Q1	5773.7	5800.08	26.376	5837.41	5879.9	42.486	5924.47	5966.5	42.032	6009.98	6074.2	64.216	6098.9	6172.9	74
1992Q2	5884	5910.6	26.6	5967	6002	35	6050.8	6101.2	50.4	6142.7	6201.4	58.7	6235.2	6296.9	61.7
1992Q3	5955	5971.6	16.6	6023.14	6058.55	35.4055	6102	6157.3	55.3	6177.1	6255	77.9	6252	6350.8	98.801
1992Q4	6026.9	6042	15.1	6101.4	6123	21.6	6179.08	6208.5	29.422	6259.37	6315.9	56.528	6349	6413.4	64.4
1993Q1	6137.75	6154.1	16.347	6223.41	6248.39	24.979	6299.6	6346	46.4	6390.1	6447.7	57.6	6476	6545.94	69.938
1993Q2	6233	6254	21	6318.36	6349.77	31.413	6410.7	6449	38.3	6506.09	6549.4	43.3095	6595.79	6654.55	58.756
1993Q3	6290.8	6304.2	13.4	6378.5	6405.9	27.4	6463.7	6503.2	39.5	6550.5	6602	51.5	6640.8	6700.3	59.5
1993Q4	6486.65	6500.08	13.4335	6577.13	6591.44	14.3175	6659.12	6684.84	25.721	6745.15	6791.97	46.8175	6838.4	6891	52.6
1994Q1	6601.3	6615.6	14.3	6688.2	6713.2	25	6780	6820.84	40.841	6874.8	6908.7	33.9	6958.45	7005.15	46.7
1994Q2	6706.39	6721.1	14.715	6801.2	6826	24.8	6885.8	6927	41.2	6976.9	7024	47.1	7071.2	7123.1	51.9
1994Q3	6764.2	6783.5	19.3	6860	6882.9	22.9	6949.16	6987.01	37.845	7042.7	7091.9	49.2	7136.48	7201.5	65.0165
1994Q4	6866.5	6883.42	16.922	6955.9	6991.2	35.3	7035.9	7098.6	62.704	7144.1	7202.77	58.672	7241.25	7311.6	70.352
1995Q1	6977.6	6997.7	20.1	7067.85	7093.97	26.1195	7150.43	7187.85	37.417	7236.3	7294.15	57.85	7323.7	7402.7	79
1995Q2	7054.95	7071.28	16.3295	7133.75	7168.1	34.35	7230.21	7271.2	40.9925	7321.12	7383.6	62.479	7413.09	7485.2	72.113
1995Q3	7078.59	7097.93	19.3315	7166.25	7201.98	35.732	7260.4	7300.7	40.304	7346.51	7414.8	68.291	7441	7498.73	57.735
1995Q4	7175.85	7198.15	22.3	7261.02	7287.45	26.433	7342.97	7379.48	36.5055	7425.9	7477.8	51.901	7501.7	7571.2	69.5
1996Q1	7410	7434.2	24.2	7484.5	7519	34.5	7571.09	7622.75	51.667	7638.9	7722.5	83.6	7719.2	7825	105.8
1996Q2	7520.7	7540.7	20	7589	7639	50	7677	7728.9	51.9	7760.4	7822.8	62.4	7826	7924.28	98.276
1996Q3	7625.8	7648.96	23.1565	7709.95	7749.2	39.25	7798	7850	52	7875.41	7940	64.585	7954	8042.9	88.9
1996Q4	7696.58	7717	20.416	7785.21	7820	34.79	7868.8	7913.9	45.1	7950.8	8013.5	62.7	8037.9	8110	72.1
1997Q1	7811.12	7831.3	20.1825	7901.5	7934.05	32.55	7977.35	8026.5	49.152	8064.29	8126.2	61.9135	8157.24	8228.8	71.555
1997Q2	7947.8	7971	23.2	8039.4	8082.66	43.258	8124.5	8185.74	61.243	8227.83	8277	49.17	8314.8	8367.4	52.6
1997Q3	8095.4	8108.82	13.418	8187.5	8214.19	26.687	8278.2	8322.9	44.7	8373.1	8425.7	52.6	8461.62	8532.31	70.689
1997Q4	8222.47	8243	20.528	8306.95	8340.8	33.85	8394	8446.6	52.6	8484	8548.55	64.547	8565.7	8643.6	77.898
1998Q1	8318.7	8342.6	23.897	8390.56	8433.9	43.344	8465.07	8526.8	61.728	8556.45	8623.8	67.354	8660.33	8726.3	65.9705
1998Q2	8407.61	8425.05	17.4365	8487	8513.94	26.941	8565.78	8619.4	53.621	8657.1	8717.88	60.784	8747.12	8820.29	73.167
1998Q3	8491.14	8515.8	24.66	8579.96	8626.68	46.72	8664.28	8724.7	60.4255	8753.52	8826.25	72.7325	8848.79	8943.9	95.112
1998Q4	8590.8	8616.2	25.4	8657.63	8712	54.367	8735	8797.83	62.829	8799.32	8885	85.684	8875.32	8988.9	113.58
1999Q1	8752.2	8778	25.8	8837	8876.39	39.385	8908.4	8968	59.6	8992	9062.1	70.1	9085	9161.7	76.7
1999Q2	8887.3	8914.3	27	8986.1	9019	32.9	9081.4	9138	56.6	9155.4	9230.6	75.2	9235.5	9345	109.5
1999Q3	8993	9009.5	16.5	9099	9136	37	9171.7	9221	49.3	9277	9321.9	44.9	9372.3	9437.7	65.4
1999Q4	9388	9417.3	29.3	9478.5	9517.3	38.8	9579.7	9642	62.3	9689	9777.7	88.7	9803	9925	122
2000Q1	9568.18	9607.5	39.321	9678.28	9739.97	61.69	9794.95	9867.05	72.099	9910.7	10000.4	89.6735	10016.9	10125.6	108.736
2000Q2	9832	9864.92	32.924	9961	10006.1	45.1	10082.4	10140	57.6	10201	10289.7	88.7	10309.2	10488.3	179.1
2000Q3	10060	10087.9	27.871	10198	10246.4	48.4	10332.7	10381.2	48.489	10449	10512	63	10586	10655	69
2000Q4	10184.4	10220.9	36.527	10322	10360.6	38.614	10450.6	10503	52.38	10588.9	10649.7	60.804	10742	10805	63
2001Q1	10191	10222	31	10281.6	10330.5	48.869	10404	10472	68	10532.4	10632	99.594	10661.8	10793.7	131.859
2001Q2	10324.6	10349.5	24.921	10417	10478	61	10520.2	10620.1	99.9	10645.5	10769	123.456	10765.8	10920.3	154.5
2001Q3	10288.5	10310.8	22.329	10388.6	10432.4	43.793	10514	10568	53.956	10626.1	10715.1	89.017	10745	10882.6	137.553
2001Q4	10203.9	10255.4	51.51	10234.9	10318	83.118	10317	10450	133	10464.2	10629.5	165.29	10602.4	10791	188.566
2002Q1	10277.4	10331	53.64	10373.3	10469	95.74	10485.9	10619	133.092	10612.1	10744	131.935	10747.1	10903.7	156.622
2002Q2	10525	10572.4	47.4	10646.5	10704.1	57.59	10755	10888	133.025	10914	11037	123	11038.6	11179.7	141.1
2002Q3	10459.2	10494.7	35.5	10569	10643.6	74.6	10698.6	10782	83.4	10826.1	10926.8	100.701	10969.4	11095.1	125.719
2002Q4	10551	10585.9	34.868	10657.5	10730.6	73.1	10778.1	10890.7	112.591	10918	11018.4	100.425	11060	11182.6	122.6
2003Q1	10658.5	10702	43.538	10775.2	10843.9	68.7	10904.4	10984.3	79.9	11030.9	11137.4	106.5	11185.7	11321	135.327
2003Q2	10777	10817.6	40.554	10896.8	10977.3	80.529	11035.4	11133	97.621	11178	11295.6	117.6	11316.5	11457.8	141.3
2003Q3	10899.2	10927.7	28.543	11032	11086.1	54.1	11173.9	11266	92.1	11309.6	11413.6	104	11455	11572.7	117.689
2003Q4	11179.2	11204.5	25.316	11322.1	11383.7	61.6	11460.5	11550.4	89.922	11601.3	11725.8	124.451	11744.1	11902.1	158
2004Q1	11398.9	11428.9	29.957	11548.3	11605.4	57.1895	11686.9	11772.3	85.4425	11828.3	11937.8	109.445	11982.6	12098.5	115.887
2004Q2	11616.3	11646.8	30.4835	11780.7	11823.9	43.2145	11926.3	12002.1	75.8485	12077.3	12185.5	108.158	12233.3	12378	144.703
2004Q3	11795.6	11825	29.355	11968.1	12011	42.9	12120	12202	82	12277.5	12404	126.534	12439.1	12571	131.936
2004Q4	11950.5	11982	31.548	12095.2	12150.9	55.699	12255.2	12319.6	64.413	12413.6	12501.4	87.756	12568.6	12700.3	131.655
2005Q1	12128.3	12159	30.742	12291.7	12344.6	52.914	12452.2	12518.4	66.193	12610.8	12686.2	75.408	12779.9	12882	102.1
2005Q2	12335.3	12367.3	31.959	12498	12545.2	47.188	12670.3	12735.5	65.28	12824	12919.6	95.675	12997.8	13109.2	111.405
2005Q3	12555.3	12585.8	30.565	12724.6	12770.7	46.1375	12895.5	12976.4	80.9555	13057.4	13161	103.571	13219.6	13356	136.364
2005Q4	12755	12788	33	12924	13013.5	89.531	13095.5	13200	104.568	13264.4	13354.9	90.488	13429.9	13554.7	124.813
2006Q1	12931	12970.6	39.541	13103.2	13170.3	67.034	13265.4	13350.3	84.86	13443.7	13523.7	80.04	13607	13712.9	105.9
2006Q2	13199.9	13233.8	33.9743	13365.1	13422.9	57.7945	13521.5	13616.9	95.3845	13676	13824	148.003	13824.1	14020.6	196.5
2006Q3	13359	13384.8	25.7549	13513.9	13578	64.0536	13677.8	13778.8	100.918	13837.6	13968	130.47	14008.1	14177.5	169.343
2006Q4	13431	13479.8	48.7691	13600.7	13669.3	68.5923	13769.6	13849	79.4128	13937.8	14030	92.2386	14103.6	14226	122.434
2007Q1	13636.2	13670.9	34.7542	13787.7	13837.7	50.0234	13954.2	14024.7	70.4371	14123.2	14217.2	93.9579	14297.7	14419.6	121.975
2007Q2	13788.2	13835.9	47.7114	13925	14005.3	80.3448	14078.2	14181.1	102.822	14270	14388.7	118.7	14427.5	14577.6	150.115
2007Q3	13877	13930.9	53.8333	14025	14105.8	80.7897	14195.3	14292.1	96.8259	14353.1	14483.6	130.589	14518.3	14686.6	168.346
2007Q4	14037.6	14077.4	39.8098	14179.5	14241.8	62.3219	14316.1	14423.8	107.645	14480.2	14619.4	139.158	14644	14820.2	176.24
2008Q1	14149	14215.9	66.9	14254.5	14350.2	95.7	14390.1	14570.8	180.657	14533	14754	220.994	14717	14956.9	239.902
2008Q2	14257	14322.5	65.52	14384.4	14498.4	114	14517.4	14647.7	130.304	14674	14841.4	167.388	14846.1	15027.2	181.048
2008Q3	14386.6	14428	41.4404	14471	14573	102.04	14608.9	14715	106.054	14724.5	14895.6	171.093	14882.7	15087.7	204.999
2008Q4	14391.5	14454.5	62.9599	14392.4	14498.3	105.945	14459.7	14603.4	143.732	14562.1	14746.6	184.49	14666.1	14898.8	232.655
2009Q1	14080.7	14159.3	78.5545	14012.4	14151.2	138.768	14069.4	14269.7	200.267	14133.3	14420.7	287.369	14241.4	14604.5	363.109
2009Q2	13999.3	14107.6	108.331	14028	14194.3	166.285	14100	14342.7	242.685	14179.9	14518.8	338.935	14323.8	14710.6	386.786
2009Q3	14255.9	14321.8	65.8943	14367.4	14521.5	154.111	14472.4	14643.6	171.148	14575.8	14849.8	273.955	14714.4	15072.2	357.833
2009Q4	14426.9	14478.8	51.8561	14534.3	14653.7	119.355	14664	14811.2	147.182	14780.6	14985.7	205.123	14941	15162.1	221.067
2010Q1	14595.6	14634.6	38.9889	14728.7	14797.1	68.4428	14895.5	14969.9	74.4415	15040.7	15146.6	105.858	15199.8	15351.6	151.81
2010Q2	14737.6	14790.6	53	14880.9	14968	87.0333	15036.6	15143.1	106.475	15192	15342.7	150.672	15356	15530.3	174.255
2010Q3	14709.5	14751.2	41.6657	14806	14909.2	103.196	14939.5	15090.5	151.023	15096	15291.9	195.914	15242.8	15498.2	255.467
2010Q4	14822.3	14891.4	69.1363	14955.9	15046.9	90.9826	15072.7	15232.2	159.587	15218.1	15415.9	197.797	15366.9	15611.6	244.731
2011Q1	15034.8	15083.1	48.3	15206	15272.9	66.8564	15380.5	15469.9	89.4082	15540	15670.6	130.59	15710	15868.7	158.691
2011Q2	15180.5	15224.5	43.9743	15351.3	15451.8	100.494	15526.8	15621.1	94.2643	15705.4	15842.7	137.306	15848.8	16060	211.271
2011Q3	15127	15172	45.0199	15267.8	15348.7	80.8659	15417.8	15547.7	129.922	15563.9	15735.2	171.289	15744.3	15927.7	183.446
2011Q4	15331.1	15385.1	53.9954	15456	15588.3	132.362	15583	15770.2	187.14	15748.4	15966.1	217.696	15901.5	16165.9	264.344
2012Q1	15421.8	15465.2	43.3316	15557.5	15627.1	69.5997	15719.6	15830	110.43	15874.9	16031.5	156.589	16045.5	16220	174.5
2012Q2	15593.2	15644.6	51.4129	15756.9	15822.3	65.3859	15922.4	16017.2	94.8	16090.4	16199.7	109.33	16276.1	16388.3	112.171
2012Q3	15715.7	15755.2	39.5143	15852.3	15908.2	55.9081	16006	16065.3	59.313	16161.2	16247	85.7806	16336.1	16447	110.903
2012Q4	15890.7	15935	44.3286	16024.2	16078.8	54.5788	16171.8	16264.5	92.683	16367	16450.6	83.6661	16557.4	16655.6	98.1488
2013Q1	15947.5	16011.2	63.6798	16104.3	16196.4	92.0621	16286.9	16395	108.119	16455.6	16583	127.36	16637	16790	152.955
2013Q2	16121	16168	46.925	16283.4	16339	55.6064	16459.7	16526	66.287	16639.4	16742.6	103.162	16818.2	16951.6	133.382
2013Q3	16775	16821	46.0002	16932	17015.5	83.5139	17109.3	17210.2	100.844	17293.1	17418.2	125.081	17484.3	17631.1	146.806
2013Q4	16983.3	17030.8	47.5	17159.1	17224.6	65.5414	17338.3	17425.2	86.8655	17521.3	17650	128.747	17715.2	17860	144.78
2014Q1	17223.7	17286.4	62.6291	17390.3	17474.9	84.657	17587.9	17705.1	117.172	17797.2	17915	117.82	18017.6	18144.1	126.453
2014Q2	17329.2	17377.6	48.4248	17529.8	17582.4	52.589	17733.7	17792	58.3172	17918.7	18016.5	97.7671	18106.5	18241.5	135.006
2014Q3	17460.9	17517	56.039	17660.3	17750.3	90.0744	17858	17943.7	85.7193	18064.2	18172.2	107.941	18248.6	18403.3	154.623
2014Q4	17692.4	17743.4	50.9882	17876.9	17953.6	76.7419	18073.6	18176.1	102.497	18291.1	18410.7	119.601	18479.4	18630.8	151.326
2015Q1	17829.1	17894.4	65.322	18021.8	18095.7	73.9127	18213.6	18297.4	83.8684	18398.4	18532.9	134.486	18614.4	18754.1	139.68
2015Q2	17855.1	17923.1	68.0073	18050.6	18142.1	91.4209	18256.9	18366.4	109.526	18390.3	18572.4	182.119	18597	18797.9	200.928
2015Q3	18011	18054.1	43.1	18197.6	18266.7	69.0843	18370.9	18475.4	104.472	18573.9	18724.4	150.569	18770.4	18959.6	189.131
2015Q4	18190.7	18231.7	41.0263	18369.6	18447.3	77.6583	18555.3	18670.3	115.031	18747.2	18887.5	140.313	18940	19111	171.056
2016Q1	18241.5	18298.1	56.6368	18410.3	18509.4	99.0638	18600.4	18723.1	122.648	18783	18943.9	160.888	18943	19158.2	215.256
2016Q2	18372.6	18411.4	38.7781	18532.5	18603.3	70.8695	18717.4	18811.7	94.2577	18903.4	19020.6	117.267	19076.3	19236.1	159.86
2016Q3	18597.7	18652.6	54.8985	18779.7	18853.2	73.5319	18958.5	19046.5	88.0242	19144.3	19263.9	119.552	19349.5	19479.7	130.168
2016Q4	18816.8	18856.7	39.9439	19003.1	19057.8	54.6781	19194	19280.5	86.5893	19375	19476.7	101.638	19565.3	19708	142.73
2017Q1	19044	19075.6	31.5801	19240.4	19292.4	51.9492	19443.4	19515.9	72.4638	19644.4	19744.1	99.6956	19859.2	19988.6	129.469
2017Q2	19213	19250.4	37.3423	19420.8	19481.3	60.5377	19626	19713.3	87.2711	19843.3	19939.4	96.1724	20044.2	20215	170.8
2017Q3	19401.3	19453.7	52.4196	19607.4	19679.8	72.4836	19794.7	19899.9	105.19	19998.9	20127	128.156	20218.6	20360.8	142.218
2017Q4	19682.9	19725	42.1372	19887.6	19947.9	60.2723	20093.4	20183.1	89.6549	20298.8	20425.9	127.081	20504.6	20642.6	137.979
2018Q1	19941.2	19998	56.7745	20148.9	20259.8	110.897	20396.4	20516	119.67	20619.8	20770.3	150.436	20851.5	21021.8	170.238
2018Q2	20200.7	20241.2	40.5101	20442.3	20485.9	43.5808	20684.7	20749.9	65.2712	20925.6	21004	78.4339	21152	21263.7	111.722
2018Q3	20646.1	20683	36.964	20895.2	20957.5	62.3173	21130.2	21220	89.8451	21376.7	21501.7	124.985	21592.5	21765.7	173.218
2018Q4	20877.7	20934.2	56.5002	21117	21196.1	79.1281	21362.4	21479.2	116.835	21579	21740	160.954	21778.2	21973.7	195.561
2019Q1	21020.5	21108.9	88.3866	21260.7	21381.9	121.142	21480.1	21632.1	151.991	21692.5	21833.7	141.234	21892.1	22080.8	188.716
2019Q2	21229.2	21323.8	94.6079	21439.6	21543.1	103.539	21660.1	21787.1	126.972	21875.9	22016	140.079	22067.4	22259.4	192.02
2019Q3	21510.9	21566.3	55.4126	21729.1	21791.1	62.0174	21927.6	22033.4	105.759	22100.6	22255	154.316	22273.6	22503.3	229.699
2019Q4	21694.3	21740	45.6885	21892.8	21945	52.1737	22090.4	22185	94.6387	22295.3	22410	114.696	22486.2	22645	158.767
2020Q1	21894.4	21947	52.5786	22100.7	22186.1	85.3659	22301.2	22441.3	140.099	22521	22673.3	152.287	22705.3	22909.1	203.854
2020Q2	19172.3	19967.5	795.232	19685.9	20553.4	867.534	20019.9	20977.1	957.178	20444.9	21395.1	950.259	20805.6	21703.6	898.027
2020Q3	20184.2	20515.4	331.208	20489.1	21018.9	529.739	20597.6	21453.4	855.824	20768.4	21667.1	898.793	21011.5	21987.1	975.622
2020Q4	21413.3	21532.2	118.906	21641.2	21824.9	183.74	21886.5	22106.2	219.659	22132.4	22425.5	293.126	22410	22732.7	322.71
2021Q1	21691.2	21816.2	124.944	22049.1	22272.5	223.413	22367.4	22799.5	432.052	22655.8	23254.3	598.457	22973.7	23524.1	550.351
2021Q2	22499.1	22716.1	217.03	22981.9	23282.2	300.322	23349	23733	384.005	23633.8	24151.3	517.47	23883.9	24500.9	617.026
2021Q3	23242	23373.2	131.251	23651.3	23871.7	220.425	23982.7	24280	297.307	24299.9	24607.6	307.706	24615.3	24995.2	379.892
2021Q4	23592.6	23721.9	129.336	23974.1	24190.9	216.758	24312.4	24604.5	292.109	24647.8	24979.5	331.716	24952.5	25379.1	426.596

## Sheet: CPROF
Measures of Cross-Sectional Dispersion for Quarterly Forecasts for NOMINAL CORP PROF AFTER TAXES (CPROF)
Units: SAAR, Bil. $
Dispersion Measure D1 = 75th Percentile Minus 25th Percentile of the Forecasts for Levels
P25 = 25th Percentile of the Forecasts for Levels
P75 = 75th Percentile of the Forecasts for Levels
At Each Survey Date T, the Quarterly Horizons Are T, T+1, T+2, T+3, and T+4
Survey_Date(T)	CPROF_P25_D1(T)	CPROF_P75_D1(T)	CPROF_D1(T)	CPROF_P25_D1(T+1)	CPROF_P75_D1(T+1)	CPROF_D1(T+1)	CPROF_P25_D1(T+2)	CPROF_P75_D1(T+2)	CPROF_D1(T+2)	CPROF_P25_D1(T+3)	CPROF_P75_D1(T+3)	CPROF_D1(T+3)	CPROF_P25_D1(T+4)	CPROF_P75_D1(T+4)	CPROF_D1(T+4)
1968Q4	50.55	52	1.45	49.8	52	2.2	49.45	52.65	3.2	51	53.35	2.35	51.5	54.3	2.8
1969Q1	50.45	52	1.55	50	52.5	2.5	51	53	2	51.1	53.6	2.5	#N/A	#N/A	#N/A
1969Q2	52	54	2	51	53.5	2.5	50.25	53.4	3.15	51	54.2	3.2	#N/A	#N/A	#N/A
1969Q3	50	52	2	49.2	51.8	2.6	48.7	52	3.3	48.5	53	4.5	#N/A	#N/A	#N/A
1969Q4	48	49	1	47	49	2	46	48.5	2.5	46	50	4	48	51.5	3.5
1970Q1	46	48	2	45	47	2	46	48	2	47	50	3	#N/A	#N/A	#N/A
1970Q2	45	47	2	45	48.2	3.2	46.7	49.4	2.7	48	50	2	49	51	2
1970Q3	43.75	46.05	2.3	44.15	47	2.85	45.8	48.25	2.45	46.3	49.8	3.5	47	51	4
1970Q4	43.5	45.5	2	45.4	47.5	2.1	46.2	49.1	2.9	47.1	49.5	2.4	48.5	51	2.5
1971Q1	45.5	47	1.5	46.5	49	2.5	47	49.1	2.1	48	51	3	50	53	3
1971Q2	46	48.75	2.75	45.7	49.1	3.4	47.9	51.85	3.95	48.75	53.1	4.35	50.5	55.35	4.85
1971Q3	46.9	49	2.1	48.1	51	2.9	49.3	53	3.7	50	55.5	5.5	51	57.7	6.7
1971Q4	46.6	48	1.4	47.9	50.35	2.45	49	52.3	3.3	50.75	54.4	3.65	52	56.65	4.65
1972Q1	50	52	2	51.7	54.2	2.5	53	56.2	3.2	54.8	58.8	4	55	60.25	5.25
1972Q2	53	54.75	1.75	55	57.4	2.4	56.2	59.65	3.45	57.15	60.8	3.65	58.05	62	3.95
1972Q3	54.5	57.6	3.1	56.2	59.4	3.2	58	62	4	59	63	4	59.9	64.2	4.3
1972Q4	55.5	56.5	1	57	58.3	1.3	58.4	60	1.6	59.5	61.3	1.8	60	62.5	2.5
1973Q1	57.5	58.9	1.4	59	60.6	1.6	59.6	62.3	2.7	60.3	63	2.7	61	64	3
1973Q2	61.5	65.7	4.2	62.6	65.1	2.5	62.6	66	3.4	62	67	5	61.2	68	6.8
1973Q3	66.8	71.5	4.7	66	72	6	65	71	6	64.5	70	5.5	65.3	70.5	5.2
1973Q4	70	72	2	65.9	71	5.1	64	70	6	65	69.3	4.3	66.3	71	4.7
1974Q1	65	69	4	63.35	67.15	3.8	64.75	68	3.25	65.25	71	5.75	67.3	72.8	5.5
1974Q2	68	74	6	68	75	7	69	75	6	70	76	6	71	78.4	7.4
1974Q3	83	89.3	6.3	79	87	8	77.5	87	9.5	78	88.6	10.6	#N/A	#N/A	#N/A
1974Q4	78	90	12	70.5	85	14.5	67.9	82.5	14.6	70	82	12	73	85	12
1975Q1	70	83	13	66.5	80	13.5	69.2	80.5	11.3	72	82	10	75	85	10
1975Q2	62.9	70	7.1	64.5	73.4	8.9	70.9	78.4	7.5	74.7	82	7.3	78	87.1	9.1
1975Q3	64	67.5	3.5	66.8	74	7.2	70	78	8	75	83	8	78	87	9
1975Q4	78	85	7	81.2	91	9.8	83	95.4	12.4	86	98.3	12.3	89	103	14
1976Q1	87	90	3	90	94	4	93	98.5	5.5	97.4	103	5.6	99.1	106	6.9
1976Q2	88	90.95	2.95	92	95.95	3.95	95	100.4	5.4	98.4	104	5.6	100.85	107	6.15
1976Q3	85	90	5	88.5	94	5.5	90.2	97	6.8	95	100	5	96.5	105	8.5
1976Q4	86.3	89.5	3.2	89	92.4	3.4	91.5	95.6	4.1	93	97.7	4.7	94	100.1	6.1
1977Q1	88.2	91.4	3.2	92	95	3	95	100	5	97.9	104	6.1	98.3	106	7.7
1977Q2	90.4	93.9	3.5	93.8	97.5	3.7	96.6	101.9	5.3	98	105	7	100	107.6	7.6
1977Q3	101.5	105	3.5	103	110	7	104.4	111	6.6	107	114	7	107	118	11
1977Q4	106	109	3	108	112	4	110	114	4	112	117	5	113	121	8
1978Q1	108	110	2	110	113.5	3.5	110.5	115.5	5	111	121.45	10.45	112	123.85	11.85
1978Q2	109	112	3	111	115	4	112	119	7	112	120	8	111	124	13
1978Q3	112	118	6	113.7	120	6.3	114	120	6	110	122	12	109	124	15
1978Q4	121.5	130	8.5	124.5	132.5	8	121	131	10	120	128.5	8.5	119	127.2	8.2
1979Q1	124	132	8	122.8	130	7.2	120	126.8	6.8	116	126	10	120	130	10
1979Q2	129	140	11	125	136	11	120	135	15	124	132	8	125	138.5	13.5
1979Q3	131.5	140	8.5	125.9	135	9.1	124.5	135	10.5	128.35	139	10.65	133	145	12
1979Q4	135.5	141	5.5	129	135	6	124.85	135	10.15	129.85	140	10.15	133.5	146	12.5
1980Q1	140.5	149.5	9	136.5	145.5	9	134	144.5	10.5	134.55	147.5	12.95	140	150	10
1980Q2	139	147	8	130	140	10	124	142	18	129.2	144	14.8	136	147	11
1980Q3	121	134	13	120	140	20	130	145	15	136	151	15	145	160	15
1980Q4	137	143	6	138	143	5	144	149	5	149	156	7	156	163	7
1981Q1	150	165	15	150	168	18	154.5	173	18.5	160	180	20	163	192	29
1981Q2	155	170	15	156.45	170.5	14.05	163	176.5	13.5	164.5	182.5	18	170	191	21
1981Q3	144.95	161	16.05	150	169.5	19.5	156	171	15	162.5	179	16.5	168	189	21
1981Q4	140	151	11	133	149	16	140	155	15	151	170	19	160	180	20
1982Q1	124	141	17	130	148	18	140	159	19	146	166	20	150.1	172	21.9
1982Q2	111	126	15	120	139	19	122	149	27	131	155	24	138	158	20
1982Q3	115	125	10	119	135	16	118	139	21	123	148	25	130	155	25
1982Q4	119	125	6	120	128	8	123	135	12	126	143	17	128	150	22
1983Q1	120	126	6	124	132	8	129	145	16	135	155	20	134	160	26
1983Q2	124.5	133.5	9	134	149.5	15.5	140	160.5	20.5	144	163	19	150	170	20
1983Q3	131	140	9	141	150	9	145	154	9	152	161	9	156	166	10
1983Q4	148	152	4	151	160	9	155	168	13	160	173	13	165	179	14
1984Q1	145	158	13	148	165	17	153	172	19	160	175	15	160	182	22
1984Q2	148.3	155	6.7	151.3	162	10.7	154	168	14	155	175	20	157	177.5	20.5
1984Q3	156	158	2	157	167	10	156	167	11	156	168	12	154	171	17
1984Q4	142	151	9	144	154	10	145	158	13	146	162	16	150	166.1	16.1
1985Q1	140.3	152	11.7	147.2	156	8.8	151	160	9	152	163	11	150	167	17
1985Q2	140	145	5	142.15	152.5	10.35	143.5	155.5	12	143.2	160	16.8	145	161	16
1985Q3	136.5	141	4.5	135.5	146	10.5	138.5	150	11.5	138	156.5	18.5	141.5	159.5	18
1985Q4	139.5	147	7.5	140.1	150	9.9	138.5	153.5	15	141.85	156.75	14.9	145	161.25	16.25
1986Q1	142.15	148	5.85	141.65	151	9.35	144	156.5	12.5	145.5	160.7	15.2	145	157	12
1986Q2	140	149	9	143	155	12	145	161	16	145	165	20	146	167	21
1986Q3	137	143	6	140	152.5	12.5	137	154	17	140	159	19	142.6	159.9	17.3
1986Q4	140	148	8	137	144	7	139	148	9	143	153.5	10.5	148	157.7	9.7
1987Q1	138	144	6	139	148	9	141	156.1	15.1	147.7	158	10.3	140	162	22
1987Q2	136	151	15	139	155	16	142	158.4	16.4	148	156	8	150	164	14
1987Q3	136.4	142	5.6	139	145	6	141	147	6	142	152	10	139.1	154.1	15
1987Q4	132.85	141.5	8.65	128.3	141.6	13.3	133	142.5	9.5	132.1	145	12.9	132	147	15
1988Q1	134	145	11	132	144	12	132.5	147	14.5	136	149	13	135	152	17
1988Q2	145	153	8	148	157	9	150	160	10	150	158	8	148	160	12
1988Q3	153.5	162.5	9	155	167.45	12.45	160.35	167.5	7.15	160	168	8	157	169	12
1988Q4	165	175	10	166.5	182	15.5	167	180	13	163	180	17	165.8	182	16.2
1989Q1	170	175	5	170	178	8	168	181	13	165	182	17	163	182	19
1989Q2	174	181.1	7.1	171	184.25	13.25	172	185.75	13.75	166.1	186	19.9	166.1	184	17.9
1989Q3	165	175	10	168	177	9	169	178	9	168.8	180	11.2	170	180	10
1989Q4	151	162	11	153.9	165	11.1	157.1	165	7.9	160.7	171	10.3	163	176	13
1990Q1	146	151	5	145	153	8	148	156.7	8.7	153	160	7	150.2	164	13.8
1990Q2	157.9	160.4	2.5	155	173	18	155.8	174	18.2	157	176	19	158	177	19
1990Q3	165	171.8	6.8	165.9	170	4.1	157.3	172	14.7	160	174	14	163.5	176.5	13
1990Q4	162.2	176	13.8	155.2	167	11.8	148	167	19	160	170	10	166.1	175.2	9.1
1991Q1	150.15	168.9	18.75	149	166.5	17.5	160.5	171.15	10.65	167.5	180.45	12.95	172	185	13
1991Q2	163.7	175.2	11.5	168	181.7	13.7	174	194	20	177.3	200	22.7	182.2	206	23.8
1991Q3	166.1	180.6	14.5	170	193	23	174.4	199.2	24.8	180.7	204.2	23.5	183	210	27
1991Q4	161.7	173.8	12.1	166	179	13	170	184.6	14.6	175	193.5	18.5	180	199.5	19.5
1992Q1	181.4	194	12.6	187	200	13	194.296	211	16.704	200	222.457	22.457	210	228.5	18.5
1992Q2	195.8	222	26.2	203	235.6	32.6	212	247	35	217.35	260.35	43	224.35	266	41.65
1992Q3	235	253.2	18.2	235.7	263	27.3	240.3	272.9	32.6	250	282.4	32.4	255	288.1	33.1
1992Q4	236	251.3	15.3	243.2	262.5	19.3	250.5	269.3	18.8	257.5	281.1	23.6	266.2	290.3	24.1
1993Q1	241	258.2	17.2	247.3	272.6	25.3	255.394	281.1	25.706	259.4	290.6	31.2	263.291	297.65	34.359
1993Q2	251.849	265.5	13.651	259	276.093	17.093	263.9	282.7	18.8	269.5	285.1	15.6	270.1	292.904	22.804
1993Q3	253.9	263.6	9.7	259.5	271	11.5	260.3	278.9	18.6	266.7	285.2	18.5	269.35	290.85	21.5
1993Q4	275.4	290	14.6	282.5	295.5	13	287.1	301.7	14.6	291.2	306.5	15.3	287.7	310.9	23.2
1994Q1	285	302	17	297.1	315.3	18.2	296.3	318.7	22.4	298.5	323	24.5	301.8	320	18.2
1994Q2	299.1	311.4	12.3	306.5	321.452	14.952	305.8	326	20.2	303	337.5	34.5	299.9	339	39.1
1994Q3	310.1	332.8	22.7	313	339.5	26.5	311	342	31	308	351	43	308.4	350.5	42.1
1994Q4	329.15	345.55	16.4	327.298	346.9	19.6025	322.95	349.85	26.9	323.45	351	27.55	324.668	355	30.3315
1995Q1	332	349.9	17.9	333.5	357.9	24.4	336.2	361.1	24.9	332.7	368.3	35.6	322	372.3	50.3
1995Q2	334.9	352.231	17.331	339.6	359	19.4	339.3	359.75	20.45	343.35	365.3	21.95	346.1	370.85	24.75
1995Q3	340.8	361	20.2	345	369.2	24.2	351.7	377	25.3	357.9	377	19.1	360.201	385	24.799
1995Q4	351.1	366	14.9	353.6	370.5	16.9	356	375	19	357.7	380	22.3	362.6	385	22.4
1996Q1	367.8	395.4	27.6	372	402.8	30.8	381.7	410.4	28.7	382.5	420.03	37.53	385	425.9	40.9
1996Q2	395.8	417.1	21.3	398	422.2	24.2	399.9	422.7	22.8	400	432.3	32.3	403	432.9	29.9
1996Q3	408.3	425.8	17.5	409.73	431.7	21.97	413.6	436.1	22.5	414.9	441.9	27	416.95	448.5	31.55
1996Q4	395.5	416.55	21.05	403.9	420.5	16.6	402.6	423.806	21.206	403	426.1	23.1	403	432.05	29.05
1997Q1	411.3	424	12.7	416.4	428.6	12.2	418.495	433.8	15.305	420.7	439	18.3	424.15	444.45	20.3
1997Q2	415.6	434.3	18.7	414.63	438.65	24.02	419.99	443.2	23.21	420.1	446.8	26.7	420.4	446.1	25.7
1997Q3	470.3	493.4	23.1	474.7	503.439	28.739	472.2	512.4	40.2	480	521	41	481.1	526	44.9
1997Q4	485	496.9	11.9	489.4	504.5	15.1	485	509	24	483.9	514.1	30.2	488.8	521	32.2
1998Q1	496.35	512.9	16.55	494.35	519.5	25.15	489.25	524.9	35.65	490.25	535.5	45.25	500.329	551.9	51.571
1998Q2	472.1	495.4	23.3	469.1	501.35	32.25	474.45	503.4	28.95	474	520.2	46.2	481	516.4	35.4
1998Q3	455	491.139	36.139	463	496.692	33.692	470.7	502.548	31.848	470.3	506.5	36.2	475	515	40
1998Q4	475	493	18	470	493	23	465.85	497.7	31.85	469.48	500.4	30.92	475	500.8	25.8
1999Q1	476	496.4	20.4	476.1	497.4	21.3	479	493.5	14.5	478.5	495.7	17.2	470	503.4	33.4
1999Q2	478.65	504.751	26.101	480.85	495.372	14.5215	481.5	498.099	16.599	468.15	504.791	36.641	473.5	511.905	38.405
1999Q3	495.8	523.9	28.1	498.6	525	26.4	494.7	526.453	31.753	495	529.713	34.713	494.727	539.9	45.173
1999Q4	582.9	609.5	26.6	586.9	612.5	25.6	592.45	631	38.55	599.5	642.5	43	594.85	652	57.15
2000Q1	605.2	622.9	17.7	606.86	629	22.14	604.4	635	30.6	602.6	640	37.4	602.7	653	50.3
2000Q2	628.05	649.45	21.4	627.5	660.15	32.65	632.9	668.95	36.05	633.8	677.1	43.3	636.7	690	53.3
2000Q3	631.1	669.4	38.3	640.9	680	39.1	639	690	51	642.5	700	57.5	658.138	710.65	52.5125
2000Q4	649.1	676.5	27.4	646.6	692.55	45.95	648.1	704.5	56.4	655.75	713.7	57.95	667.8	725	57.2
2001Q1	608.1	655	46.9	610.3	655.25	44.95	615.7	665.45	49.75	632.5	671.15	38.65	643.4	696.2	52.8
2001Q2	600.5	621	20.5	600	632	32	618.6	643	24.4	625	655.3	30.3	639.6	669	29.4
2001Q3	469.8	502.691	32.891	472.25	508.695	36.4455	469.85	520.2	50.35	488.498	534.15	45.6515	499.872	551.9	52.028
2001Q4	435	491.3	56.3	443.65	495.6	51.95	447	509.2	62.2	478.6	530	51.4	505.2	550	44.8
2002Q1	467.2	500.65	33.45	477.65	516.5	38.85	488.05	528.85	40.8	512.845	553.5	40.6555	504.8	575	70.2
2002Q2	437.742	500	62.258	445	500	55	455.4	515.2	59.8	465.503	539.15	73.6465	475.868	559.8	83.9325
2002Q3	445	482	37	451.4	500	48.6	464.1	515.9	51.8	471.9	528.5	56.6	478.6	547.3	68.7
2002Q4	456.7	484.7	28	462.2	499.8	37.6	469.691	515	45.309	475	533.9	58.9	484.4	560.3	75.9
2003Q1	456.568	480.09	23.522	467	495	28	472.6	515	42.4	485.7	539.8	54.1	491.117	551	59.883
2003Q2	477	500.1	23.1	491.04	528.6	37.56	505.7	539.2	33.5	521	558.1	37.1	536.973	575	38.027
2003Q3	498.25	535.995	37.7455	503.75	550.1	46.35	515.05	568.944	53.8945	528.35	582.931	54.5805	541.32	593.189	51.869
2003Q4	496	556.25	60.25	516.156	568.67	52.514	519	589.5	70.5	531.3	609.3	78	572.007	624.2	52.193
2004Q1	678.222	717.49	39.268	701.084	737.6	36.516	724.106	758.98	34.874	746.616	786.4	39.784	746.616	933	186.384
2004Q2	720.655	778.033	57.378	730.1	809.68	79.58	724.5	843.02	118.52	800	946.65	146.65	810	966.1	156.1
2004Q3	711.197	752.347	41.1505	717.7	785.2	67.5	747.822	862.694	114.873	745.372	882.712	137.339	758.032	909.556	151.524
2004Q4	737.552	774.74	37.188	751.008	838.645	87.637	763.819	856.843	93.024	770	869.4	99.4	787.326	886.678	99.352
2005Q1	734.197	871.881	137.685	748.2	890.936	142.736	742	901.753	159.752	751.95	916.554	164.605	757.95	918.519	160.569
2005Q2	921.375	1010	88.625	928.464	1020	91.536	934	1022	88	951	1018.83	67.829	972	1030.93	58.929
2005Q3	1025	1057.98	32.981	1033.42	1073.51	40.084	1024.3	1096.19	71.894	1020	1102.8	82.8	1005	1121.46	116.46
2005Q4	1050	1147.92	97.922	1067	1139.57	72.568	1081	1120.36	39.357	1081.38	1144	62.621	1072	1166	94
2006Q1	1010	1092.53	82.525	1023.75	1117.1	93.347	1009.17	1119.8	110.629	1031.77	1144.29	112.522	1025.48	1164.25	138.767
2006Q2	1105	1155	50	1098.19	1155	56.8101	1109.01	1170	60.9892	1113.2	1170	56.7969	1121.56	1191.14	69.5776
2006Q3	1086.25	1157.39	71.1382	1100.95	1173.43	72.4768	1133.97	1193.73	59.7563	1147.6	1209.66	62.0574	1131.77	1233.4	101.632
2006Q4	1109	1154.06	45.0639	1136.2	1192	55.8	1147.2	1212.9	65.7	1138.5	1211.3	72.7973	1157.6	1221.78	64.1794
2007Q1	1173.12	1342.7	169.585	1188	1350.78	162.784	1211.37	1371.47	160.098	1211.96	1393.41	181.452	1229.66	1398.6	168.945
2007Q2	1186.9	1236.95	50.0531	1215	1257.7	42.7	1229.61	1275	45.3901	1247.48	1305.53	58.0543	1256.55	1346.2	89.65
2007Q3	1117.55	1148.97	31.4165	1125.6	1160.67	35.0705	1143.1	1186.3	43.1962	1155.85	1200.8	44.9511	1156.26	1216.81	60.5488
2007Q4	1134	1189.56	55.5646	1144.28	1198.32	54.0344	1154	1215.57	61.571	1167.03	1227.6	60.57	1182	1239.7	57.7
2008Q1	1125	1364.04	239.038	1153.49	1365.3	211.81	1180.33	1365.7	185.374	1176.5	1376.51	200.009	1197.3	1395.81	198.508
2008Q2	1109.73	1172.59	62.8545	1126.03	1211.35	85.3171	1125.55	1231.75	106.198	1132.9	1211.32	78.4173	1139.65	1247.22	107.568
2008Q3	1175.43	1233.4	57.97	1179.26	1235	55.74	1159.8	1246.15	86.3466	1153.7	1268	114.3	1168	1292.9	124.9
2008Q4	1050	1162.2	112.2	1034	1130.23	96.234	1024	1144.93	120.927	1051.91	1175.84	123.93	1065.65	1211.4	145.75
2009Q1	969.527	1088	118.476	945.6	1097.92	152.325	957.4	1119.15	161.755	972.1	1154.1	182	993.025	1169.3	176.275
2009Q2	876	983.059	107.059	867.929	1008.21	140.279	883.793	1025.35	141.556	916.9	1030.63	113.732	930.756	1064	133.244
2009Q3	925.186	1006.1	80.9145	939.063	1034.1	95.0368	968.365	1055.2	86.835	962.48	1114.18	151.699	1015.82	1156.2	140.378
2009Q4	951.506	1086.02	134.518	982.097	1117.38	135.284	1024.83	1127.3	102.475	1055.18	1164.37	109.187	1033.61	1207.88	174.28
2010Q1	1073.8	1204.4	130.6	1074.72	1225.99	151.271	1113.7	1257.71	144.01	1105	1289	184	1130	1302.4	172.4
2010Q2	1128.2	1210.5	82.2983	1150.44	1258	107.557	1182	1272	90	1193.75	1280	86.2507	1202.65	1295	92.3458
2010Q3	1181.6	1263.3	81.7	1195.1	1304.2	109.1	1223.79	1348.3	124.508	1209.7	1373	163.3	1254.79	1415.5	160.707
2010Q4	1234.35	1309.45	75.098	1255.46	1346.45	90.9865	1273.71	1346.45	72.7331	1292.6	1399.2	106.6	1299.8	1433.9	134.1
2011Q1	1249.6	1381.19	131.593	1265.17	1398.96	133.789	1280.07	1398.85	118.776	1289.12	1439.21	150.084	1316.15	1429.87	113.716
2011Q2	1271.3	1334.8	63.5	1277.3	1346.8	69.5	1314.07	1368.93	54.8629	1319.4	1413.73	94.3261	1336.7	1436.56	99.8648
2011Q3	1452	1500.61	48.606	1459.3	1527.7	68.4	1472	1551.76	79.76	1480	1580.44	100.439	1483	1608.15	125.149
2011Q4	1500.04	1572.87	72.8345	1521.86	1590.36	68.5023	1543.11	1620.97	77.866	1558.37	1626.82	68.4539	1566.39	1653.66	87.2754
2012Q1	1558.71	1616.47	57.7675	1583.68	1639.06	55.3798	1606.19	1673.45	67.2568	1609.99	1697.5	87.5141	1612.76	1703	90.241
2012Q2	1562.93	1636.6	73.6707	1575	1667.46	92.4598	1581.64	1670.8	89.1622	1610.6	1690	79.4	1623.23	1720	96.772
2012Q3	1460.75	1618.28	157.533	1481.53	1642.21	160.685	1495	1655.7	160.7	1518	1671	153	1540.01	1680	139.991
2012Q4	1500	1636	136	1500.58	1628.99	128.413	1530	1633.5	103.502	1546.5	1661.4	114.9	1559.45	1756.42	196.966
2013Q1	1502.06	1574.6	72.5376	1504.72	1591.14	86.4199	1516.47	1609.44	92.9733	1518.5	1666.32	147.818	1534.6	1691.5	156.896
2013Q2	1510.87	1601	90.1328	1524.03	1628.23	104.195	1549.35	1658.4	109.052	1564.21	1684.01	119.807	1590	1705	115
2013Q3	1617.85	1660.32	42.4684	1624.52	1686.74	62.2169	1630.3	1716.72	86.4149	1640.5	1740.13	99.6269	1656.23	1765.48	109.247
2013Q4	1667.79	1721	53.2067	1666.85	1747.09	80.2382	1695	1769.4	74.4	1718	1795.32	77.3152	1728.11	1806.46	78.3464
2014Q1	1698.38	1776.56	78.1892	1713.23	1784.88	71.6534	1733.87	1818.4	84.5337	1766.73	1824.25	57.5216	1786	1850.71	64.7057
2014Q2	1723	1800.04	77.0361	1747	1834.42	87.4206	1767	1853.68	86.682	1799.42	1876.85	77.4362	1825	1904.83	79.8298
2014Q3	1488.4	1660.25	171.85	1503.3	1688.57	185.268	1516.5	1691.77	175.274	1576	1718.7	142.702	1625	1748.8	123.801
2014Q4	1539.37	1623.63	84.2642	1536.55	1637.6	101.054	1574.65	1666.29	91.6407	1589.65	1708.84	119.189	1611	1744.01	133.014
2015Q1	1578	1661.3	83.3	1600	1683.9	83.9	1625	1712.4	87.4	1644	1739.88	95.883	1648.9	1760.63	111.732
2015Q2	1546.98	1627.6	80.6237	1570	1641.26	71.2599	1580.17	1684.6	104.425	1575	1719.91	144.909	1600	1749.74	149.739
2015Q3	1522	1585.13	63.128	1546.35	1591.9	45.5595	1567.91	1630.93	63.02	1592.8	1685.68	92.88	1598.8	1707.74	108.94
2015Q4	1549.05	1597.83	48.7835	1557.03	1615.54	58.5103	1568.91	1635.13	66.2227	1583.99	1660.69	76.6971	1596.89	1690.72	93.821
2016Q1	1483.74	1541.54	57.7936	1519	1584.01	65.009	1525	1607.77	82.7691	1542.99	1648.8	105.813	1535.6	1656.36	120.764
2016Q2	1388.42	1429.05	40.6301	1403	1446.1	43.1	1410	1471.16	61.1613	1420.89	1513.85	92.9589	1433.68	1544.01	110.333
2016Q3	1504.49	1531.71	27.2173	1501.35	1557.6	56.2478	1528.76	1576.29	47.5306	1547.04	1603.36	56.3153	1552.51	1614.51	61.994
2016Q4	1495	1549.38	54.3758	1515	1569.6	54.6	1532	1585.3	53.3	1540	1612.7	72.7022	1551.45	1642.13	90.6753
2017Q1	1565.29	1645.64	80.3508	1574	1686.85	112.849	1582	1714.42	132.421	1582	1741.63	159.625	1611.94	1782.93	170.994
2017Q2	1608.39	1681.47	73.0825	1614.33	1711.47	97.138	1641.22	1730.4	89.1817	1638.17	1790.33	152.151	1660.86	1831.87	171.009
2017Q3	1645.93	1723.5	77.5742	1659	1736	76.9972	1668	1787.35	119.345	1670.59	1835.8	165.206	1690.24	1852.79	162.547
2017Q4	1690.14	1730	39.8639	1692	1739	47	1704.75	1758	53.2508	1719.58	1767.71	48.1345	1720.87	1812.7	91.83
2018Q1	1761.96	1870.4	108.442	1769.68	1904.59	134.915	1799.05	1930.75	131.695	1819.6	1957.05	137.451	1875.07	1981.4	106.334
2018Q2	1813.04	1844.19	31.1501	1834.57	1878.86	44.2887	1858.63	1918.5	59.866	1860.05	1963.14	103.097	1875.67	1981.45	105.776
2018Q3	1970.52	2041.61	71.0893	1968.49	2074.51	106.016	1997.77	2104.23	106.456	2012.74	2138.24	125.504	1982.75	2173.32	190.571
2018Q4	2020	2120.05	100.05	2053.73	2149.04	95.311	2060	2180	120	2080	2195	115	2073.91	2210.83	136.925
2019Q1	2072.42	2144.29	71.8732	2095.86	2170.79	74.9338	2102.52	2198.76	96.2413	2103.86	2224.65	120.785	2104.9	2239.41	134.501
2019Q2	2109	2153.1	44.104	2123.71	2186.17	62.46	2124.3	2194.6	70.3	2133.26	2216.56	83.2953	2155.04	2250	94.96
2019Q3	1803.77	1861	57.23	1816.61	1886	69.3943	1813.21	1892.24	79.0296	1807.57	1926	118.43	1821.44	1952.81	131.367
2019Q4	1856.96	1905.96	49.0041	1816.28	1915	98.7166	1850.73	1935	84.2738	1863.5	1965	101.5	1889.16	2004.9	115.744
2020Q1	1833.67	1916.38	82.7131	1877.5	1939.9	62.4031	1882	1986.68	104.681	1884.3	2004	119.7	1893.97	2059.53	165.555
2020Q2	1408.03	1729.89	321.859	1434.52	1828.16	393.636	1445.41	1879.6	434.189	1635.13	1957.54	322.415	1708.71	1999.8	291.094
2020Q3	1594.67	1856.37	261.695	1585.42	1873.8	288.376	1625.5	1895.54	270.043	1670.06	1933.8	263.739	1708.47	1950	241.527
2020Q4	1666.11	1874.2	208.09	1638.35	1891.2	252.848	1666.7	1923.15	256.454	1704.47	1986.77	282.296	1724.85	2019.12	294.274
2021Q1	1848.5	2099.79	251.286	1894.8	2111.8	216.997	1926.36	2182.05	255.69	1976.14	2273	296.856	1988.83	2264.67	275.834
2021Q2	2014.3	2152.84	138.54	2053.82	2214.49	160.668	2102.8	2274.18	171.382	2123.9	2332.24	208.34	2153.26	2349.2	195.937
2021Q3	2236.28	2443.02	206.744	2255.1	2475.03	219.925	2262	2496.76	234.756	2294.1	2514.92	220.819	2332.2	2544.5	212.3
2021Q4	2328.17	2508	179.832	2350.02	2563.04	213.027	2390	2559.66	169.664	2417.2	2639.2	222	2403.4	2743.47	340.07

## Sheet: UNEMP
Measures of Cross-Sectional Dispersion for Quarterly Forecasts for UNEMPLOYMENT RATE (UNEMP)
Units: SA, Percent
Dispersion Measure D1 = 75th Percentile Minus 25th Percentile of the Forecasts for Levels
P25 = 25th Percentile of the Forecasts for Levels
P75 = 75th Percentile of the Forecasts for Levels
At Each Survey Date T, the Quarterly Horizons Are T, T+1, T+2, T+3, and T+4
Survey_Date(T)	UNEMP_P25_D1(T)	UNEMP_P75_D1(T)	UNEMP_D1(T)	UNEMP_P25_D1(T+1)	UNEMP_P75_D1(T+1)	UNEMP_D1(T+1)	UNEMP_P25_D1(T+2)	UNEMP_P75_D1(T+2)	UNEMP_D1(T+2)	UNEMP_P25_D1(T+3)	UNEMP_P75_D1(T+3)	UNEMP_D1(T+3)	UNEMP_P25_D1(T+4)	UNEMP_P75_D1(T+4)	UNEMP_D1(T+4)
1968Q4	3.6	3.7	0.1	3.7	4	0.3	3.9	4.2	0.3	3.9	4.1	0.2	3.7	4.1	0.4
1969Q1	3.5	3.6	0.1	3.6	4	0.4	3.7	4	0.3	3.7	4	0.3	#N/A	#N/A	#N/A
1969Q2	3.4	3.5	0.1	3.5	3.8	0.3	3.6	4	0.4	3.7	4.1	0.4	#N/A	#N/A	#N/A
1969Q3	3.6	3.7	0.1	3.7	4	0.3	3.8	4.1	0.3	3.7	4.2	0.5	#N/A	#N/A	#N/A
1969Q4	3.7	4	0.3	4	4.3	0.3	4.2	4.6	0.4	4.1	4.6	0.5	4	4.6	0.6
1970Q1	3.9	4.2	0.3	4.2	4.5	0.3	4.2	4.6	0.4	4.1	4.5	0.4	#N/A	#N/A	#N/A
1970Q2	4.5	4.8	0.3	4.6	5	0.4	4.5	5	0.5	4.3	5	0.7	4	5	1
1970Q3	5	5.2	0.2	4.8	5.4	0.6	4.7	5.4	0.7	4.6	5.3	0.7	4.35	5.2	0.85
1970Q4	5.6	5.8	0.2	5.5	6	0.5	5.3	5.8	0.5	5.1	5.9	0.8	5	5.7	0.7
1971Q1	5.9	6	0.1	5.7	6	0.3	5.6	5.9	0.3	5.4	5.9	0.5	5.2	5.7	0.5
1971Q2	5.8	6	0.2	5.6	6	0.4	5.6	5.9	0.3	5.3	5.8	0.5	5.1	5.6	0.5
1971Q3	5.7	6	0.3	5.5	5.8	0.3	5.3	5.7	0.4	5	5.5	0.5	4.9	5.45	0.55
1971Q4	5.9	5.9	0	5.7	5.8	0.1	5.5	5.7	0.2	5.3	5.6	0.3	5.05	5.4	0.35
1972Q1	5.8	5.9	0.1	5.6	5.8	0.2	5.4	5.6	0.2	5.2	5.5	0.3	5	5.4	0.4
1972Q2	5.7	5.8	0.1	5.5	5.6	0.1	5.3	5.5	0.2	5.1	5.4	0.3	5	5.4	0.4
1972Q3	5.5	5.6	0.1	5.3	5.5	0.2	5.2	5.4	0.2	5	5.3	0.3	5	5.3	0.3
1972Q4	5.3	5.4	0.1	5.2	5.3	0.1	5	5.2	0.2	4.9	5.1	0.2	4.8	5.1	0.3
1973Q1	5	5.1	0.1	4.9	5	0.1	4.8	5	0.2	4.7	5	0.3	4.7	5	0.3
1973Q2	4.8	4.9	0.1	4.7	4.9	0.2	4.7	4.9	0.2	4.75	5	0.25	4.8	5.1	0.3
1973Q3	4.6	4.9	0.3	4.8	5	0.2	4.9	5.2	0.3	4.9	5.3	0.4	5	5.3	0.3
1973Q4	4.7	4.9	0.2	5	5.3	0.3	5.3	5.7	0.4	5.5	6	0.5	5.5	6	0.5
1974Q1	5.2	5.4	0.2	5.5	5.8	0.3	5.7	6	0.3	5.7	6.1	0.4	5.6	6.1	0.5
1974Q2	5.2	5.5	0.3	5.4	5.8	0.4	5.5	5.9	0.4	5.3	5.9	0.6	5.2	5.8	0.6
1974Q3	5.3	5.5	0.2	5.6	5.8	0.2	5.7	6	0.3	5.6	6.1	0.5	#N/A	#N/A	#N/A
1974Q4	6.2	6.5	0.3	6.6	7.1	0.5	6.9	7.5	0.6	6.9	7.6	0.7	6.5	7.5	1
1975Q1	7.5	8.4	0.9	8	8.6	0.6	8	8.6	0.6	7.9	8.6	0.7	7.6	8.35	0.75
1975Q2	8.9	9.1	0.2	8.9	9.3	0.4	8.5	9.1	0.6	8.3	8.9	0.6	8	8.7	0.7
1975Q3	8.5	8.9	0.4	8.4	8.8	0.4	8.1	8.6	0.5	7.8	8.3	0.5	7.5	8.1	0.6
1975Q4	8.2	8.4	0.2	8	8.2	0.2	7.8	8.1	0.3	7.4	8	0.6	7.2	7.8	0.6
1976Q1	7.8	8	0.2	7.6	7.9	0.3	7.35	7.7	0.35	7.1	7.6	0.5	7	7.4	0.4
1976Q2	7.4	7.5	0.1	7.2	7.3	0.1	6.9	7.1	0.2	6.7	7	0.3	6.45	6.9	0.45
1976Q3	7.2	7.5	0.3	7	7.2	0.2	6.7	7	0.3	6.5	7	0.5	6.3	6.9	0.6
1976Q4	7.6	7.8	0.2	7.4	7.7	0.3	7.2	7.5	0.3	7	7.4	0.4	6.8	7.3	0.5
1977Q1	7.7	8	0.3	7.4	7.7	0.3	7.1	7.5	0.4	6.9	7.4	0.5	6.7	7.5	0.8
1977Q2	7	7.2	0.2	6.9	7.1	0.2	6.8	7	0.2	6.6	6.9	0.3	6.5	6.9	0.4
1977Q3	6.8	7	0.2	6.7	6.9	0.2	6.5	6.9	0.4	6.4	6.9	0.5	6.3	6.8	0.5
1977Q4	6.9	7	0.1	6.7	7.1	0.4	6.6	7	0.4	6.6	7	0.4	6.5	6.9	0.4
1978Q1	6.3	6.6	0.3	6.25	6.7	0.45	6.2	6.5	0.3	6.1	6.65	0.55	6	6.6	0.6
1978Q2	6	6.1	0.1	5.9	6.1	0.2	5.9	6.2	0.3	5.9	6.3	0.4	5.9	6.4	0.5
1978Q3	6	6.1	0.1	6	6.2	0.2	6	6.2	0.2	5.9	6.4	0.5	6.1	6.6	0.5
1978Q4	5.9	6.1	0.2	6	6.3	0.3	6	6.5	0.5	6.2	6.7	0.5	6.3	7	0.7
1979Q1	5.9	6	0.1	6	6.2	0.2	6.1	6.6	0.5	6.2	6.9	0.7	6.3	7	0.7
1979Q2	5.8	5.9	0.1	6	6.3	0.3	6.1	6.7	0.6	6.3	7.2	0.9	6.1	7.3	1.2
1979Q3	5.9	6.2	0.3	6.4	6.7	0.3	6.6	7.2	0.6	6.6	7.6	1	6.6	7.75	1.15
1979Q4	6.1	6.2	0.1	6.6	7	0.4	7	7.6	0.6	6.9	8	1.1	6.6	8	1.4
1980Q1	6.1	6.4	0.3	6.5	6.9	0.4	6.5	7.4	0.9	6.6	7.6	1	6.7	8	1.3
1980Q2	6.8	7.4	0.6	7.1	8	0.9	7.2	8.4	1.2	7.2	8.5	1.3	7.4	8.6	1.2
1980Q3	7.9	8.1	0.2	8.2	8.7	0.5	8.1	8.7	0.6	8	8.6	0.6	7.9	8.4	0.5
1980Q4	7.6	7.8	0.2	7.6	8	0.4	7.5	7.9	0.4	7.4	7.8	0.4	7.2	7.7	0.5
1981Q1	7.5	7.7	0.2	7.5	7.8	0.3	7.3	7.8	0.5	7.2	7.7	0.5	7	7.5	0.5
1981Q2	7.3	7.5	0.2	7.3	7.5	0.2	7.2	7.5	0.3	7	7.4	0.4	6.8	7.3	0.5
1981Q3	7.2	7.4	0.2	7.4	7.6	0.2	7.4	7.6	0.2	7.1	7.6	0.5	7.1	7.4	0.3
1981Q4	8	8.2	0.2	8.2	8.5	0.3	8	8.7	0.7	7.8	8.5	0.7	7.5	8.3	0.8
1982Q1	8.9	9.2	0.3	8.8	9.3	0.5	8.4	9.3	0.9	8.3	9.1	0.8	8.1	8.9	0.8
1982Q2	9.2	9.5	0.3	9.2	9.5	0.3	8.9	9.4	0.5	8.7	9.3	0.6	8.5	9.2	0.7
1982Q3	9.7	9.9	0.2	9.4	9.8	0.4	9.2	9.6	0.4	9	9.5	0.5	8.7	9.3	0.6
1982Q4	10.3	10.5	0.2	10.2	10.5	0.3	9.8	10.4	0.6	9.6	10.1	0.5	9.2	9.9	0.7
1983Q1	10.5	10.8	0.3	10.2	10.6	0.4	10	10.3	0.3	9.7	10.2	0.5	9.5	10.2	0.7
1983Q2	10.1	10.2	0.1	9.8	10	0.2	9.6	9.9	0.3	9.4	9.7	0.3	9.1	9.5	0.4
1983Q3	9.4	9.6	0.2	9.1	9.5	0.4	8.75	9.4	0.65	8.5	9.15	0.65	8.4	9	0.6
1983Q4	8.7	9.1	0.4	8.5	8.85	0.35	8.3	8.7	0.4	8.1	8.55	0.45	7.9	8.35	0.45
1984Q1	7.9	8.1	0.2	7.7	8	0.3	7.5	7.8	0.3	7.4	7.7	0.3	7.2	7.7	0.5
1984Q2	7.6	7.7	0.1	7.4	7.6	0.2	7.3	7.6	0.3	7.2	7.5	0.3	7.1	7.5	0.4
1984Q3	7	7.3	0.3	6.8	7.2	0.4	6.7	7.1	0.4	6.7	7.1	0.4	6.6	7.4	0.8
1984Q4	7.3	7.5	0.2	7.2	7.4	0.2	7	7.4	0.4	6.8	7.5	0.7	6.8	7.6	0.8
1985Q1	7.15	7.25	0.1	7	7.1	0.1	6.9	7.05	0.15	6.75	7	0.25	6.7	7	0.3
1985Q2	7.2	7.3	0.1	7.1	7.3	0.2	6.9	7.3	0.4	6.8	7.4	0.6	6.75	7.45	0.7
1985Q3	7.2	7.3	0.1	7.2	7.3	0.1	7	7.4	0.4	7	7.4	0.4	7	7.5	0.5
1985Q4	7	7.1	0.1	7	7.2	0.2	7	7.2	0.2	7	7.2	0.2	6.9	7.3	0.4
1986Q1	6.7	6.9	0.2	6.6	6.9	0.3	6.5	6.9	0.4	6.4	6.9	0.5	6.5	7	0.5
1986Q2	7	7.1	0.1	6.8	7	0.2	6.65	6.95	0.3	6.6	7	0.4	6.5	7	0.5
1986Q3	6.9	7.2	0.3	6.9	7.1	0.2	6.8	7.15	0.35	6.7	7.15	0.45	6.55	7.15	0.6
1986Q4	6.9	7	0.1	6.9	7	0.1	6.8	7	0.2	6.8	7	0.2	6.7	6.95	0.25
1987Q1	6.7	6.9	0.2	6.7	6.9	0.2	6.6	6.8	0.2	6.6	6.8	0.2	6.4	6.85	0.45
1987Q2	6.4	6.6	0.2	6.3	6.6	0.3	6.3	6.6	0.3	6.3	6.6	0.3	6.25	6.6	0.35
1987Q3	6	6.2	0.2	5.9	6.2	0.3	5.8	6.1	0.3	5.7	6.1	0.4	5.7	6.2	0.5
1987Q4	5.9	6	0.1	6	6.2	0.2	6	6.3	0.3	6.1	6.4	0.3	6	6.5	0.5
1988Q1	5.8	6	0.2	5.9	6.1	0.2	5.9	6.2	0.3	5.8	6.2	0.4	5.8	6.3	0.5
1988Q2	5.4	5.6	0.2	5.3	5.6	0.3	5.2	5.7	0.5	5.3	5.8	0.5	5.4	5.7	0.3
1988Q3	5.3	5.5	0.2	5.3	5.5	0.2	5.3	5.6	0.3	5.4	5.8	0.4	5.4	5.9	0.5
1988Q4	5.4	5.4	0	5.3	5.5	0.2	5.3	5.6	0.3	5.3	5.7	0.4	5.3	5.8	0.5
1989Q1	5.3	5.4	0.1	5.3	5.5	0.2	5.3	5.6	0.3	5.3	5.6	0.3	5.4	5.8	0.4
1989Q2	5.2	5.3	0.1	5.2	5.4	0.2	5.3	5.6	0.3	5.4	5.7	0.3	5.35	5.85	0.5
1989Q3	5.3	5.4	0.1	5.3	5.4	0.1	5.3	5.6	0.3	5.3	5.8	0.5	5.2	5.7	0.5
1989Q4	5.3	5.4	0.1	5.4	5.7	0.3	5.5	5.8	0.3	5.5	5.8	0.3	5.4	5.8	0.4
1990Q1	5.4	5.5	0.1	5.4	5.7	0.3	5.3	5.7	0.4	5.4	5.7	0.3	5.5	5.7	0.2
1990Q2	5.3	5.4	0.1	5.3	5.5	0.2	5.3	5.5	0.2	5.3	5.6	0.3	5.3	5.6	0.3
1990Q3	5.4	5.5	0.1	5.5	5.8	0.3	5.5	6	0.5	5.5	6.1	0.6	5.4	6.15	0.75
1990Q4	5.8	5.9	0.1	6	6.4	0.4	6.1	6.7	0.6	6.2	6.9	0.7	6	6.9	0.9
1991Q1	6.3	6.4	0.1	6.5	6.8	0.3	6.7	7	0.3	6.6	7.1	0.5	6.6	6.9	0.3
1991Q2	6.7	6.9	0.2	6.8	7.2	0.4	6.7	7	0.3	6.5	6.9	0.4	6.3	6.8	0.5
1991Q3	6.8	7	0.2	6.7	7	0.3	6.5	6.9	0.4	6.3	6.8	0.5	6.15	6.65	0.5
1991Q4	6.8	6.9	0.1	6.8	6.9	0.1	6.7	6.9	0.2	6.5	6.8	0.3	6.4	6.7	0.3
1992Q1	7.1	7.2	0.1	6.9	7.2	0.3	6.8	7.05	0.25	6.55	6.9	0.35	6.4	6.9	0.5
1992Q2	7.2	7.2	0	7	7.1	0.1	6.7	7	0.3	6.6	6.9	0.3	6.4	6.8	0.4
1992Q3	7.5	7.7	0.2	7.3	7.6	0.3	7.1	7.5	0.4	7	7.3	0.3	6.8	7.1	0.3
1992Q4	7.4	7.5	0.1	7.3	7.4	0.1	7.1	7.4	0.3	7	7.3	0.3	6.8	7.1	0.3
1993Q1	7.1	7.2	0.1	7	7.1	0.1	6.8	7	0.2	6.7	6.9	0.2	6.5	6.9	0.4
1993Q2	6.9	7	0.1	6.75	6.9	0.15	6.6	6.9	0.3	6.4	6.8	0.4	6.3	6.8	0.5
1993Q3	6.8	6.9	0.1	6.7	6.9	0.2	6.6	6.8	0.2	6.5	6.7	0.2	6.4	6.7	0.3
1993Q4	6.7	6.8	0.1	6.5	6.7	0.2	6.4	6.6	0.2	6.3	6.6	0.3	6.2	6.55	0.35
1994Q1	6.6	6.7	0.1	6.4	6.6	0.2	6.3	6.5	0.2	6.25	6.4	0.15	6.2	6.4	0.2
1994Q2	6.4	6.5	0.1	6.2	6.5	0.3	6.1	6.4	0.3	6	6.2	0.2	6	6.3	0.3
1994Q3	6.1	6.1	0	6	6.1	0.1	5.8	6.1	0.3	5.8	6.1	0.3	5.8	6.15	0.35
1994Q4	5.8	5.9	0.1	5.7	5.9	0.2	5.6	5.9	0.3	5.6	5.8	0.2	5.6	5.8	0.2
1995Q1	5.5	5.6	0.1	5.3	5.6	0.3	5.3	5.6	0.3	5.3	5.6	0.3	5.35	5.6	0.25
1995Q2	5.5	5.7	0.2	5.5	5.7	0.2	5.4	5.8	0.4	5.4	5.8	0.4	5.4	5.8	0.4
1995Q3	5.7	5.8	0.1	5.6	5.8	0.2	5.5	5.9	0.4	5.55	5.95	0.4	5.6	6	0.4
1995Q4	5.6	5.7	0.1	5.6	5.7	0.1	5.5	5.8	0.3	5.5	5.8	0.3	5.5	5.9	0.4
1996Q1	5.7	5.8	0.1	5.65	5.9	0.25	5.6	5.9	0.3	5.6	5.9	0.3	5.6	5.9	0.3
1996Q2	5.5	5.6	0.1	5.5	5.6	0.1	5.4	5.7	0.3	5.4	5.7	0.3	5.45	5.8	0.35
1996Q3	5.35	5.5	0.15	5.3	5.5	0.2	5.3	5.6	0.3	5.35	5.65	0.3	5.4	5.7	0.3
1996Q4	5.2	5.3	0.1	5.2	5.4	0.2	5.2	5.5	0.3	5.2	5.5	0.3	5.25	5.6	0.35
1997Q1	5.3	5.4	0.1	5.2	5.4	0.2	5.1	5.5	0.4	5.1	5.6	0.5	5.2	5.6	0.4
1997Q2	5	5.1	0.1	4.9	5.2	0.3	4.9	5.25	0.35	5	5.35	0.35	5	5.5	0.5
1997Q3	4.8	4.9	0.1	4.8	5	0.2	4.75	5.05	0.3	4.8	5.1	0.3	4.9	5.2	0.3
1997Q4	4.7	4.8	0.1	4.7	4.9	0.2	4.6	5	0.4	4.6	5.1	0.5	4.6	5.1	0.5
1998Q1	4.6	4.7	0.1	4.5	4.8	0.3	4.5	4.9	0.4	4.5	5	0.5	4.5	5	0.5
1998Q2	4.4	4.6	0.2	4.4	4.7	0.3	4.4	4.8	0.4	4.4	4.9	0.5	4.4	5	0.6
1998Q3	4.45	4.5	0.05	4.4	4.6	0.2	4.45	4.7	0.25	4.5	4.8	0.3	4.45	4.8	0.35
1998Q4	4.6	4.6	0	4.5	4.7	0.2	4.6	4.8	0.2	4.7	5	0.3	4.7	5.1	0.4
1999Q1	4.3	4.4	0.1	4.2	4.5	0.3	4.3	4.6	0.3	4.3	4.7	0.4	4.3	4.8	0.5
1999Q2	4.2	4.3	0.1	4.2	4.4	0.2	4.2	4.5	0.3	4.3	4.6	0.3	4.3	4.7	0.4
1999Q3	4.2	4.3	0.1	4.2	4.4	0.2	4.2	4.4	0.2	4.2	4.5	0.3	4.3	4.7	0.4
1999Q4	4.1	4.2	0.1	4.1	4.3	0.2	4.1	4.4	0.3	4.1	4.4	0.3	4.1	4.5	0.4
2000Q1	4	4.1	0.1	3.9	4.1	0.2	3.95	4.2	0.25	3.95	4.3	0.35	4	4.4	0.4
2000Q2	3.9	4	0.1	3.9	4	0.1	3.9	4.1	0.2	4	4.2	0.2	4	4.25	0.25
2000Q3	4	4.1	0.1	4	4.1	0.1	4	4.3	0.3	4	4.3	0.3	4.1	4.4	0.3
2000Q4	4	4.1	0.1	4	4.2	0.2	4.1	4.23	0.13	4.1	4.27	0.17	4.1	4.3	0.2
2001Q1	4.2	4.3	0.1	4.3	4.6	0.3	4.3	4.7	0.4	4.3	4.8	0.5	4.2	4.8	0.6
2001Q2	4.4	4.6	0.2	4.5	4.8	0.3	4.6	4.9	0.3	4.6	5	0.4	4.6	5	0.4
2001Q3	4.6	4.7	0.1	4.8	4.9	0.1	4.8	5	0.2	4.8	5	0.2	4.7	5.1	0.4
2001Q4	5.5	5.7	0.2	5.8	6	0.2	5.8	6.2	0.4	5.75	6.3	0.55	5.5	6.2	0.7
2002Q1	5.7	5.9	0.2	5.8	6.1	0.3	5.7	6.1	0.4	5.5	6.1	0.6	5.5	6	0.5
2002Q2	5.8	6	0.2	5.7	6	0.3	5.6	5.95	0.35	5.4	5.9	0.5	5.2	5.8	0.6
2002Q3	5.9	6	0.1	5.9	6.1	0.2	5.7	6	0.3	5.6	6	0.4	5.5	5.8	0.3
2002Q4	5.8	5.9	0.1	5.7	6	0.3	5.6	6	0.4	5.5	5.9	0.4	5.4	5.7	0.3
2003Q1	5.8	6.1	0.3	5.8	6.2	0.4	5.7	6.1	0.4	5.6	5.9	0.3	5.5	5.8	0.3
2003Q2	6	6.1	0.1	5.9	6.1	0.2	5.8	6.1	0.3	5.7	6	0.3	5.6	5.9	0.3
2003Q3	6.2	6.2	0	6	6.2	0.2	5.8	6.1	0.3	5.7	6.1	0.4	5.6	6	0.4
2003Q4	6	6.1	0.1	5.9	6	0.1	5.7	6	0.3	5.6	5.9	0.3	5.4	5.8	0.4
2004Q1	5.6	5.8	0.2	5.5	5.7	0.2	5.4	5.6	0.2	5.305	5.6	0.295	5.3	5.5	0.2
2004Q2	5.6	5.6365	0.0365	5.4665	5.5855	0.119	5.4	5.5	0.1	5.203	5.5	0.297	5.167	5.4	0.233
2004Q3	5.5	5.6	0.1	5.4	5.5	0.1	5.261	5.4	0.139	5.2	5.4	0.2	5.1	5.4	0.3
2004Q4	5.4	5.433	0.033	5.3	5.4	0.1	5.2	5.367	0.167	5.1	5.4	0.3	5.1	5.3	0.2
2005Q1	5.2185	5.3	0.0815	5.1965	5.3	0.1035	5.1	5.3	0.2	5.05	5.253	0.203	5	5.2	0.2
2005Q2	5.149	5.209	0.06	5.1	5.2	0.1	5	5.2	0.2	5	5.2	0.2	5	5.2	0.2
2005Q3	5	5.0065	0.0065	4.9	5	0.1	4.8	5.019	0.219	4.8	5.04	0.24	4.8	5.029	0.229
2005Q4	5	5.073	0.073	4.9	5.03	0.13	4.833	5.004	0.171	4.8	5	0.2	4.8	5.037	0.237
2006Q1	4.8	4.9	0.1	4.7	4.9	0.2	4.7	4.909	0.209	4.673	5	0.327	4.7	5	0.3
2006Q2	4.6898	4.7	0.0102	4.6	4.7949	0.1949	4.6	4.8153	0.2153	4.6	4.9819	0.3819	4.6	5	0.4
2006Q3	4.6897	4.8	0.1103	4.63	4.9	0.27	4.68	4.9587	0.2787	4.7	5.0404	0.3404	4.7	5.084	0.384
2006Q4	4.5	4.7	0.2	4.5	4.8	0.3	4.6667	4.9	0.2333	4.6	5	0.4	4.6	5.0898	0.4898
2007Q1	4.5951	4.6	0.0049	4.6	4.8	0.2	4.6	4.8	0.2	4.5	4.9	0.4	4.6	4.9858	0.3858
2007Q2	4.5	4.6	0.1	4.5607	4.7	0.1393	4.6	4.8	0.2	4.5	4.9	0.4	4.5068	4.9	0.3932
2007Q3	4.5561	4.6918	0.1357	4.6	4.7142	0.1142	4.6	4.8	0.2	4.6	4.8	0.2	4.5557	4.8	0.2443
2007Q4	4.7	4.8	0.1	4.8	4.9	0.1	4.8	5	0.2	4.8	5.1	0.3	4.8	5.1	0.3
2008Q1	5	5	0	5.1	5.3	0.2	5.1	5.4	0.3	5.1	5.5	0.4	5	5.4905	0.4905
2008Q2	5.1	5.2	0.1	5.2	5.5	0.3	5.3	5.6	0.3	5.3	5.7	0.4	5.2	5.8	0.6
2008Q3	5.6	5.758	0.158	5.7	5.91	0.21	5.8	6.0435	0.2435	5.9	6.2567	0.3567	5.7	6.2298	0.5298
2008Q4	6.5	6.7	0.2	6.9	7.2608	0.3608	7.1	7.6	0.5	7.3211	7.8	0.4789	7.4	7.9	0.5
2009Q1	7.6006	7.9	0.2994	8.1	8.5	0.4	8.5	8.9	0.4	8.6	9.2	0.6	8.5	9.385	0.885
2009Q2	8.9964	9.2	0.2036	9.394	9.7483	0.3543	9.5	10	0.5	9.6	10.1	0.5	9.4	10	0.6
2009Q3	9.6	9.7087	0.1087	9.8	10.1	0.3	9.7	10.2	0.5	9.5385	10.0335	0.495	9.4	9.9	0.5
2009Q4	9.9333	10.2	0.2667	10.1	10.4	0.3	9.956	10.3	0.344	9.7	10.2	0.5	9.4	10.1	0.7
2010Q1	9.8	10.0225	0.2225	9.7	10.036	0.336	9.506	10	0.494	9.3	9.8333	0.5333	9.1	9.7	0.6
2010Q2	9.6	9.82	0.22	9.4972	9.7044	0.2072	9.1	9.6	0.5	8.9	9.5	0.6	8.5933	9.332	0.7387
2010Q3	9.535	9.7	0.165	9.4	9.7	0.3	9.1	9.6	0.5	8.9119	9.4758	0.5639	8.8	9.3	0.5
2010Q4	9.5	9.7	0.2	9.4	9.71	0.31	9.2	9.6	0.4	9	9.5	0.5	8.8	9.47	0.67
2011Q1	9.1667	9.4	0.2333	9.0626	9.4	0.3374	8.8	9.2997	0.4997	8.6	9.1	0.5	8.4	8.9541	0.5541
2011Q2	8.73	8.9	0.17	8.57	8.8	0.23	8.3	8.65	0.35	8.19	8.5	0.31	7.9	8.4	0.5
2011Q3	9	9.1205	0.1205	8.8626	9.1	0.2374	8.7	9	0.3	8.5005	8.9	0.3995	8.3667	8.8	0.4333
2011Q4	9	9.1	0.1	8.8038	9.055	0.2512	8.7	9.0593	0.3593	8.572	9	0.428	8.4445	9	0.5555
2012Q1	8.3	8.5	0.2	8.2	8.4077	0.2077	8.0979	8.4	0.3021	7.9029	8.37	0.4671	7.8	8.3	0.5
2012Q2	8.1	8.2	0.1	7.9227	8.182	0.2593	7.8	8.1	0.3	7.6	8	0.4	7.5	7.9	0.4
2012Q3	8.128	8.3	0.172	8	8.2	0.2	7.9	8.2	0.3	7.8268	8.0626	0.2358	7.7	8	0.3
2012Q4	7.8362	7.9694	0.1332	7.8	8	0.2	7.7	7.9	0.2	7.5667	7.85	0.2833	7.5	7.8	0.3
2013Q1	7.8	7.9	0.1	7.6679	7.8	0.1321	7.5	7.709	0.209	7.35	7.6312	0.2812	7.2	7.6	0.4
2013Q2	7.5017	7.6131	0.1114	7.4	7.6	0.2	7.3	7.54	0.24	7.1	7.4013	0.3013	6.9921	7.2925	0.3004
2013Q3	7.3867	7.5	0.1133	7.2756	7.4	0.1244	7.1	7.3	0.2	7	7.2055	0.2055	6.8156	7.1184	0.3028
2013Q4	7.2	7.3	0.1	7.0997	7.2	0.1003	6.9	7.1	0.2	6.7	7	0.3	6.6	6.9	0.3
2014Q1	6.6	6.8	0.2	6.4895	6.6673	0.1778	6.325	6.5648	0.2398	6.2	6.5	0.3	6.1	6.3036	0.2036
2014Q2	6.3	6.4241	0.1241	6.2	6.4	0.2	6.0587	6.3157	0.2569	5.9	6.2234	0.3234	5.8	6.1964	0.3964
2014Q3	6.0983	6.145	0.0467	5.9	6.0324	0.1324	5.8	5.9333	0.1333	5.6	5.9	0.3	5.5	5.8	0.3
2014Q4	5.8	5.9	0.1	5.7	5.8866	0.1866	5.542	5.8	0.258	5.42	5.7123	0.2923	5.2895	5.6944	0.4049
2015Q1	5.5	5.6	0.1	5.36	5.516	0.156	5.2022	5.4724	0.2702	5.1369	5.4	0.2631	5.0556	5.3593	0.3037
2015Q2	5.3527	5.4166	0.0638	5.2	5.32	0.12	5	5.2773	0.2773	4.9	5.2	0.3	4.8	5.117	0.317
2015Q3	5.2	5.3	0.1	5.1	5.2	0.1	4.97	5.1069	0.1369	4.8632	5.1	0.2368	4.7933	5.1	0.3067
2015Q4	5	5.0842	0.0842	4.9	5.01	0.11	4.8	4.99	0.19	4.7	4.9425	0.2425	4.6	4.9416	0.3416
2016Q1	4.8754	4.9211	0.0457	4.7816	4.8946	0.1129	4.6	4.81	0.21	4.5	4.75	0.25	4.5	4.8	0.3
2016Q2	4.8255	4.9702	0.1446	4.7526	4.8878	0.1352	4.6	4.8139	0.2139	4.5838	4.7702	0.1863	4.5	4.719	0.219
2016Q3	4.8	4.862	0.062	4.7	4.8	0.1	4.6	4.7577	0.1577	4.5684	4.7382	0.1698	4.4849	4.7264	0.2415
2016Q4	4.8	4.9	0.1	4.7	4.8053	0.1053	4.6	4.8	0.2	4.5833	4.8	0.2167	4.5	4.8	0.3
2017Q1	4.6882	4.7947	0.1065	4.5985	4.7	0.1015	4.5	4.7	0.2	4.4	4.6018	0.2018	4.3089	4.6	0.2911
2017Q2	4.4072	4.6	0.1928	4.4	4.5	0.1	4.3	4.5	0.2	4.2	4.5	0.3	4.12	4.4941	0.3741
2017Q3	4.2998	4.31	0.0102	4.2	4.3	0.1	4.1	4.3	0.2	4	4.3	0.3	4	4.3329	0.3329
2017Q4	4.1	4.2	0.1	4.0151	4.2	0.1849	3.9568	4.2	0.2432	3.9	4.2	0.3	3.8904	4.1966	0.3062
2018Q1	4	4.1	0.1	3.9	4	0.1	3.8	4	0.2	3.7603	3.9937	0.2333	3.6	4	0.4
2018Q2	3.9	4	0.1	3.8	3.9439	0.1439	3.7	3.9058	0.2058	3.69	3.8962	0.2062	3.6	3.9	0.3
2018Q3	3.8	3.8908	0.0908	3.6622	3.8	0.1378	3.5852	3.7575	0.1723	3.5	3.8	0.3	3.4	3.7714	0.3714
2018Q4	3.6812	3.7083	0.0271	3.6	3.7494	0.1494	3.5	3.7558	0.2558	3.4	3.7546	0.3546	3.4286	3.8	0.3714
2019Q1	3.795	3.9	0.105	3.6761	3.82	0.1439	3.5679	3.8533	0.2854	3.5	3.9	0.4	3.4225	3.9	0.4775
2019Q2	3.6	3.7	0.1	3.5567	3.7	0.1433	3.5	3.8	0.3	3.4686	3.8	0.3314	3.4	3.9	0.5
2019Q3	3.6	3.7	0.1	3.5667	3.7013	0.1347	3.5	3.8	0.3	3.5	3.8	0.3	3.452	3.9	0.448
2019Q4	3.5573	3.7	0.1427	3.5	3.73	0.23	3.5	3.8	0.3	3.4934	3.9	0.4066	3.4652	3.9519	0.4867
2020Q1	3.5	3.6	0.1	3.4	3.6	0.2	3.4328	3.6776	0.2449	3.4127	3.7	0.2873	3.378	3.7396	0.3616
2020Q2	14.4971	17.6043	3.1071	10.6909	15.3882	4.6973	8.9451	14	5.0549	7.9333	12.1	4.1667	7	11	4
2020Q3	9.6	10.5306	0.9306	8.6949	9.8	1.1051	7.8758	9.25	1.3742	7.4106	9	1.5894	6.928	8.5879	1.6599
2020Q4	6.73	7.5	0.77	6.394	7	0.606	6	6.7581	0.7581	5.7	6.4504	0.7504	5.4	6.1	0.7
2021Q1	6.281	6.6	0.319	5.9547	6.3	0.3453	5.4	6	0.6	5	5.8	0.8	4.6048	5.6	0.9952
2021Q2	5.5944	5.9836	0.3892	5.0272	5.6212	0.594	4.5622	5.4	0.8378	4.3357	5.2	0.8643	4.1444	5	0.8556
2021Q3	5.1807	5.403	0.2222	4.7	5.1653	0.4653	4.35	4.9116	0.5616	4.05	4.7654	0.7154	3.9	4.6417	0.7417
2021Q4	4.4784	4.6	0.1216	4.1141	4.4999	0.3858	3.8595	4.3	0.4405	3.7141	4.2	0.4859	3.6987	4.1	0.4013

## Sheet: EMP
Measures of Cross-Sectional Dispersion for Quarterly Forecasts for NONFARM PAYROLL EMPLOYMENT (EMP)
Units: SA, Thous
Dispersion Measure D1 = 75th Percentile Minus 25th Percentile of the Forecasts for Levels
P25 = 25th Percentile of the Forecasts for Levels
P75 = 75th Percentile of the Forecasts for Levels
At Each Survey Date T, the Quarterly Horizons Are T, T+1, T+2, T+3, and T+4
Survey_Date(T)	EMP_P25_D1(T)	EMP_P75_D1(T)	EMP_D1(T)	EMP_P25_D1(T+1)	EMP_P75_D1(T+1)	EMP_D1(T+1)	EMP_P25_D1(T+2)	EMP_P75_D1(T+2)	EMP_D1(T+2)	EMP_P25_D1(T+3)	EMP_P75_D1(T+3)	EMP_D1(T+3)	EMP_P25_D1(T+4)	EMP_P75_D1(T+4)	EMP_D1(T+4)
1968Q4	#N/A	#N/A	#N/A	#N/A	#N/A	#N/A	#N/A	#N/A	#N/A	#N/A	#N/A	#N/A	#N/A	#N/A	#N/A
1969Q1	#N/A	#N/A	#N/A	#N/A	#N/A	#N/A	#N/A	#N/A	#N/A	#N/A	#N/A	#N/A	#N/A	#N/A	#N/A
1969Q2	#N/A	#N/A	#N/A	#N/A	#N/A	#N/A	#N/A	#N/A	#N/A	#N/A	#N/A	#N/A	#N/A	#N/A	#N/A
1969Q3	#N/A	#N/A	#N/A	#N/A	#N/A	#N/A	#N/A	#N/A	#N/A	#N/A	#N/A	#N/A	#N/A	#N/A	#N/A
1969Q4	#N/A	#N/A	#N/A	#N/A	#N/A	#N/A	#N/A	#N/A	#N/A	#N/A	#N/A	#N/A	#N/A	#N/A	#N/A
1970Q1	#N/A	#N/A	#N/A	#N/A	#N/A	#N/A	#N/A	#N/A	#N/A	#N/A	#N/A	#N/A	#N/A	#N/A	#N/A
1970Q2	#N/A	#N/A	#N/A	#N/A	#N/A	#N/A	#N/A	#N/A	#N/A	#N/A	#N/A	#N/A	#N/A	#N/A	#N/A
1970Q3	#N/A	#N/A	#N/A	#N/A	#N/A	#N/A	#N/A	#N/A	#N/A	#N/A	#N/A	#N/A	#N/A	#N/A	#N/A
1970Q4	#N/A	#N/A	#N/A	#N/A	#N/A	#N/A	#N/A	#N/A	#N/A	#N/A	#N/A	#N/A	#N/A	#N/A	#N/A
1971Q1	#N/A	#N/A	#N/A	#N/A	#N/A	#N/A	#N/A	#N/A	#N/A	#N/A	#N/A	#N/A	#N/A	#N/A	#N/A
1971Q2	#N/A	#N/A	#N/A	#N/A	#N/A	#N/A	#N/A	#N/A	#N/A	#N/A	#N/A	#N/A	#N/A	#N/A	#N/A
1971Q3	#N/A	#N/A	#N/A	#N/A	#N/A	#N/A	#N/A	#N/A	#N/A	#N/A	#N/A	#N/A	#N/A	#N/A	#N/A
1971Q4	#N/A	#N/A	#N/A	#N/A	#N/A	#N/A	#N/A	#N/A	#N/A	#N/A	#N/A	#N/A	#N/A	#N/A	#N/A
1972Q1	#N/A	#N/A	#N/A	#N/A	#N/A	#N/A	#N/A	#N/A	#N/A	#N/A	#N/A	#N/A	#N/A	#N/A	#N/A
1972Q2	#N/A	#N/A	#N/A	#N/A	#N/A	#N/A	#N/A	#N/A	#N/A	#N/A	#N/A	#N/A	#N/A	#N/A	#N/A
1972Q3	#N/A	#N/A	#N/A	#N/A	#N/A	#N/A	#N/A	#N/A	#N/A	#N/A	#N/A	#N/A	#N/A	#N/A	#N/A
1972Q4	#N/A	#N/A	#N/A	#N/A	#N/A	#N/A	#N/A	#N/A	#N/A	#N/A	#N/A	#N/A	#N/A	#N/A	#N/A
1973Q1	#N/A	#N/A	#N/A	#N/A	#N/A	#N/A	#N/A	#N/A	#N/A	#N/A	#N/A	#N/A	#N/A	#N/A	#N/A
1973Q2	#N/A	#N/A	#N/A	#N/A	#N/A	#N/A	#N/A	#N/A	#N/A	#N/A	#N/A	#N/A	#N/A	#N/A	#N/A
1973Q3	#N/A	#N/A	#N/A	#N/A	#N/A	#N/A	#N/A	#N/A	#N/A	#N/A	#N/A	#N/A	#N/A	#N/A	#N/A
1973Q4	#N/A	#N/A	#N/A	#N/A	#N/A	#N/A	#N/A	#N/A	#N/A	#N/A	#N/A	#N/A	#N/A	#N/A	#N/A
1974Q1	#N/A	#N/A	#N/A	#N/A	#N/A	#N/A	#N/A	#N/A	#N/A	#N/A	#N/A	#N/A	#N/A	#N/A	#N/A
1974Q2	#N/A	#N/A	#N/A	#N/A	#N/A	#N/A	#N/A	#N/A	#N/A	#N/A	#N/A	#N/A	#N/A	#N/A	#N/A
1974Q3	#N/A	#N/A	#N/A	#N/A	#N/A	#N/A	#N/A	#N/A	#N/A	#N/A	#N/A	#N/A	#N/A	#N/A	#N/A
1974Q4	#N/A	#N/A	#N/A	#N/A	#N/A	#N/A	#N/A	#N/A	#N/A	#N/A	#N/A	#N/A	#N/A	#N/A	#N/A
1975Q1	#N/A	#N/A	#N/A	#N/A	#N/A	#N/A	#N/A	#N/A	#N/A	#N/A	#N/A	#N/A	#N/A	#N/A	#N/A
1975Q2	#N/A	#N/A	#N/A	#N/A	#N/A	#N/A	#N/A	#N/A	#N/A	#N/A	#N/A	#N/A	#N/A	#N/A	#N/A
1975Q3	#N/A	#N/A	#N/A	#N/A	#N/A	#N/A	#N/A	#N/A	#N/A	#N/A	#N/A	#N/A	#N/A	#N/A	#N/A
1975Q4	#N/A	#N/A	#N/A	#N/A	#N/A	#N/A	#N/A	#N/A	#N/A	#N/A	#N/A	#N/A	#N/A	#N/A	#N/A
1976Q1	#N/A	#N/A	#N/A	#N/A	#N/A	#N/A	#N/A	#N/A	#N/A	#N/A	#N/A	#N/A	#N/A	#N/A	#N/A
1976Q2	#N/A	#N/A	#N/A	#N/A	#N/A	#N/A	#N/A	#N/A	#N/A	#N/A	#N/A	#N/A	#N/A	#N/A	#N/A
1976Q3	#N/A	#N/A	#N/A	#N/A	#N/A	#N/A	#N/A	#N/A	#N/A	#N/A	#N/A	#N/A	#N/A	#N/A	#N/A
1976Q4	#N/A	#N/A	#N/A	#N/A	#N/A	#N/A	#N/A	#N/A	#N/A	#N/A	#N/A	#N/A	#N/A	#N/A	#N/A
1977Q1	#N/A	#N/A	#N/A	#N/A	#N/A	#N/A	#N/A	#N/A	#N/A	#N/A	#N/A	#N/A	#N/A	#N/A	#N/A
1977Q2	#N/A	#N/A	#N/A	#N/A	#N/A	#N/A	#N/A	#N/A	#N/A	#N/A	#N/A	#N/A	#N/A	#N/A	#N/A
1977Q3	#N/A	#N/A	#N/A	#N/A	#N/A	#N/A	#N/A	#N/A	#N/A	#N/A	#N/A	#N/A	#N/A	#N/A	#N/A
1977Q4	#N/A	#N/A	#N/A	#N/A	#N/A	#N/A	#N/A	#N/A	#N/A	#N/A	#N/A	#N/A	#N/A	#N/A	#N/A
1978Q1	#N/A	#N/A	#N/A	#N/A	#N/A	#N/A	#N/A	#N/A	#N/A	#N/A	#N/A	#N/A	#N/A	#N/A	#N/A
1978Q2	#N/A	#N/A	#N/A	#N/A	#N/A	#N/A	#N/A	#N/A	#N/A	#N/A	#N/A	#N/A	#N/A	#N/A	#N/A
1978Q3	#N/A	#N/A	#N/A	#N/A	#N/A	#N/A	#N/A	#N/A	#N/A	#N/A	#N/A	#N/A	#N/A	#N/A	#N/A
1978Q4	#N/A	#N/A	#N/A	#N/A	#N/A	#N/A	#N/A	#N/A	#N/A	#N/A	#N/A	#N/A	#N/A	#N/A	#N/A
1979Q1	#N/A	#N/A	#N/A	#N/A	#N/A	#N/A	#N/A	#N/A	#N/A	#N/A	#N/A	#N/A	#N/A	#N/A	#N/A
1979Q2	#N/A	#N/A	#N/A	#N/A	#N/A	#N/A	#N/A	#N/A	#N/A	#N/A	#N/A	#N/A	#N/A	#N/A	#N/A
1979Q3	#N/A	#N/A	#N/A	#N/A	#N/A	#N/A	#N/A	#N/A	#N/A	#N/A	#N/A	#N/A	#N/A	#N/A	#N/A
1979Q4	#N/A	#N/A	#N/A	#N/A	#N/A	#N/A	#N/A	#N/A	#N/A	#N/A	#N/A	#N/A	#N/A	#N/A	#N/A
1980Q1	#N/A	#N/A	#N/A	#N/A	#N/A	#N/A	#N/A	#N/A	#N/A	#N/A	#N/A	#N/A	#N/A	#N/A	#N/A
1980Q2	#N/A	#N/A	#N/A	#N/A	#N/A	#N/A	#N/A	#N/A	#N/A	#N/A	#N/A	#N/A	#N/A	#N/A	#N/A
1980Q3	#N/A	#N/A	#N/A	#N/A	#N/A	#N/A	#N/A	#N/A	#N/A	#N/A	#N/A	#N/A	#N/A	#N/A	#N/A
1980Q4	#N/A	#N/A	#N/A	#N/A	#N/A	#N/A	#N/A	#N/A	#N/A	#N/A	#N/A	#N/A	#N/A	#N/A	#N/A
1981Q1	#N/A	#N/A	#N/A	#N/A	#N/A	#N/A	#N/A	#N/A	#N/A	#N/A	#N/A	#N/A	#N/A	#N/A	#N/A
1981Q2	#N/A	#N/A	#N/A	#N/A	#N/A	#N/A	#N/A	#N/A	#N/A	#N/A	#N/A	#N/A	#N/A	#N/A	#N/A
1981Q3	#N/A	#N/A	#N/A	#N/A	#N/A	#N/A	#N/A	#N/A	#N/A	#N/A	#N/A	#N/A	#N/A	#N/A	#N/A
1981Q4	#N/A	#N/A	#N/A	#N/A	#N/A	#N/A	#N/A	#N/A	#N/A	#N/A	#N/A	#N/A	#N/A	#N/A	#N/A
1982Q1	#N/A	#N/A	#N/A	#N/A	#N/A	#N/A	#N/A	#N/A	#N/A	#N/A	#N/A	#N/A	#N/A	#N/A	#N/A
1982Q2	#N/A	#N/A	#N/A	#N/A	#N/A	#N/A	#N/A	#N/A	#N/A	#N/A	#N/A	#N/A	#N/A	#N/A	#N/A
1982Q3	#N/A	#N/A	#N/A	#N/A	#N/A	#N/A	#N/A	#N/A	#N/A	#N/A	#N/A	#N/A	#N/A	#N/A	#N/A
1982Q4	#N/A	#N/A	#N/A	#N/A	#N/A	#N/A	#N/A	#N/A	#N/A	#N/A	#N/A	#N/A	#N/A	#N/A	#N/A
1983Q1	#N/A	#N/A	#N/A	#N/A	#N/A	#N/A	#N/A	#N/A	#N/A	#N/A	#N/A	#N/A	#N/A	#N/A	#N/A
1983Q2	#N/A	#N/A	#N/A	#N/A	#N/A	#N/A	#N/A	#N/A	#N/A	#N/A	#N/A	#N/A	#N/A	#N/A	#N/A
1983Q3	#N/A	#N/A	#N/A	#N/A	#N/A	#N/A	#N/A	#N/A	#N/A	#N/A	#N/A	#N/A	#N/A	#N/A	#N/A
1983Q4	#N/A	#N/A	#N/A	#N/A	#N/A	#N/A	#N/A	#N/A	#N/A	#N/A	#N/A	#N/A	#N/A	#N/A	#N/A
1984Q1	#N/A	#N/A	#N/A	#N/A	#N/A	#N/A	#N/A	#N/A	#N/A	#N/A	#N/A	#N/A	#N/A	#N/A	#N/A
1984Q2	#N/A	#N/A	#N/A	#N/A	#N/A	#N/A	#N/A	#N/A	#N/A	#N/A	#N/A	#N/A	#N/A	#N/A	#N/A
1984Q3	#N/A	#N/A	#N/A	#N/A	#N/A	#N/A	#N/A	#N/A	#N/A	#N/A	#N/A	#N/A	#N/A	#N/A	#N/A
1984Q4	#N/A	#N/A	#N/A	#N/A	#N/A	#N/A	#N/A	#N/A	#N/A	#N/A	#N/A	#N/A	#N/A	#N/A	#N/A
1985Q1	#N/A	#N/A	#N/A	#N/A	#N/A	#N/A	#N/A	#N/A	#N/A	#N/A	#N/A	#N/A	#N/A	#N/A	#N/A
1985Q2	#N/A	#N/A	#N/A	#N/A	#N/A	#N/A	#N/A	#N/A	#N/A	#N/A	#N/A	#N/A	#N/A	#N/A	#N/A
1985Q3	#N/A	#N/A	#N/A	#N/A	#N/A	#N/A	#N/A	#N/A	#N/A	#N/A	#N/A	#N/A	#N/A	#N/A	#N/A
1985Q4	#N/A	#N/A	#N/A	#N/A	#N/A	#N/A	#N/A	#N/A	#N/A	#N/A	#N/A	#N/A	#N/A	#N/A	#N/A
1986Q1	#N/A	#N/A	#N/A	#N/A	#N/A	#N/A	#N/A	#N/A	#N/A	#N/A	#N/A	#N/A	#N/A	#N/A	#N/A
1986Q2	#N/A	#N/A	#N/A	#N/A	#N/A	#N/A	#N/A	#N/A	#N/A	#N/A	#N/A	#N/A	#N/A	#N/A	#N/A
1986Q3	#N/A	#N/A	#N/A	#N/A	#N/A	#N/A	#N/A	#N/A	#N/A	#N/A	#N/A	#N/A	#N/A	#N/A	#N/A
1986Q4	#N/A	#N/A	#N/A	#N/A	#N/A	#N/A	#N/A	#N/A	#N/A	#N/A	#N/A	#N/A	#N/A	#N/A	#N/A
1987Q1	#N/A	#N/A	#N/A	#N/A	#N/A	#N/A	#N/A	#N/A	#N/A	#N/A	#N/A	#N/A	#N/A	#N/A	#N/A
1987Q2	#N/A	#N/A	#N/A	#N/A	#N/A	#N/A	#N/A	#N/A	#N/A	#N/A	#N/A	#N/A	#N/A	#N/A	#N/A
1987Q3	#N/A	#N/A	#N/A	#N/A	#N/A	#N/A	#N/A	#N/A	#N/A	#N/A	#N/A	#N/A	#N/A	#N/A	#N/A
1987Q4	#N/A	#N/A	#N/A	#N/A	#N/A	#N/A	#N/A	#N/A	#N/A	#N/A	#N/A	#N/A	#N/A	#N/A	#N/A
1988Q1	#N/A	#N/A	#N/A	#N/A	#N/A	#N/A	#N/A	#N/A	#N/A	#N/A	#N/A	#N/A	#N/A	#N/A	#N/A
1988Q2	#N/A	#N/A	#N/A	#N/A	#N/A	#N/A	#N/A	#N/A	#N/A	#N/A	#N/A	#N/A	#N/A	#N/A	#N/A
1988Q3	#N/A	#N/A	#N/A	#N/A	#N/A	#N/A	#N/A	#N/A	#N/A	#N/A	#N/A	#N/A	#N/A	#N/A	#N/A
1988Q4	#N/A	#N/A	#N/A	#N/A	#N/A	#N/A	#N/A	#N/A	#N/A	#N/A	#N/A	#N/A	#N/A	#N/A	#N/A
1989Q1	#N/A	#N/A	#N/A	#N/A	#N/A	#N/A	#N/A	#N/A	#N/A	#N/A	#N/A	#N/A	#N/A	#N/A	#N/A
1989Q2	#N/A	#N/A	#N/A	#N/A	#N/A	#N/A	#N/A	#N/A	#N/A	#N/A	#N/A	#N/A	#N/A	#N/A	#N/A
1989Q3	#N/A	#N/A	#N/A	#N/A	#N/A	#N/A	#N/A	#N/A	#N/A	#N/A	#N/A	#N/A	#N/A	#N/A	#N/A
1989Q4	#N/A	#N/A	#N/A	#N/A	#N/A	#N/A	#N/A	#N/A	#N/A	#N/A	#N/A	#N/A	#N/A	#N/A	#N/A
1990Q1	#N/A	#N/A	#N/A	#N/A	#N/A	#N/A	#N/A	#N/A	#N/A	#N/A	#N/A	#N/A	#N/A	#N/A	#N/A
1990Q2	#N/A	#N/A	#N/A	#N/A	#N/A	#N/A	#N/A	#N/A	#N/A	#N/A	#N/A	#N/A	#N/A	#N/A	#N/A
1990Q3	#N/A	#N/A	#N/A	#N/A	#N/A	#N/A	#N/A	#N/A	#N/A	#N/A	#N/A	#N/A	#N/A	#N/A	#N/A
1990Q4	#N/A	#N/A	#N/A	#N/A	#N/A	#N/A	#N/A	#N/A	#N/A	#N/A	#N/A	#N/A	#N/A	#N/A	#N/A
1991Q1	#N/A	#N/A	#N/A	#N/A	#N/A	#N/A	#N/A	#N/A	#N/A	#N/A	#N/A	#N/A	#N/A	#N/A	#N/A
1991Q2	#N/A	#N/A	#N/A	#N/A	#N/A	#N/A	#N/A	#N/A	#N/A	#N/A	#N/A	#N/A	#N/A	#N/A	#N/A
1991Q3	#N/A	#N/A	#N/A	#N/A	#N/A	#N/A	#N/A	#N/A	#N/A	#N/A	#N/A	#N/A	#N/A	#N/A	#N/A
1991Q4	#N/A	#N/A	#N/A	#N/A	#N/A	#N/A	#N/A	#N/A	#N/A	#N/A	#N/A	#N/A	#N/A	#N/A	#N/A
1992Q1	#N/A	#N/A	#N/A	#N/A	#N/A	#N/A	#N/A	#N/A	#N/A	#N/A	#N/A	#N/A	#N/A	#N/A	#N/A
1992Q2	#N/A	#N/A	#N/A	#N/A	#N/A	#N/A	#N/A	#N/A	#N/A	#N/A	#N/A	#N/A	#N/A	#N/A	#N/A
1992Q3	#N/A	#N/A	#N/A	#N/A	#N/A	#N/A	#N/A	#N/A	#N/A	#N/A	#N/A	#N/A	#N/A	#N/A	#N/A
1992Q4	#N/A	#N/A	#N/A	#N/A	#N/A	#N/A	#N/A	#N/A	#N/A	#N/A	#N/A	#N/A	#N/A	#N/A	#N/A
1993Q1	#N/A	#N/A	#N/A	#N/A	#N/A	#N/A	#N/A	#N/A	#N/A	#N/A	#N/A	#N/A	#N/A	#N/A	#N/A
1993Q2	#N/A	#N/A	#N/A	#N/A	#N/A	#N/A	#N/A	#N/A	#N/A	#N/A	#N/A	#N/A	#N/A	#N/A	#N/A
1993Q3	#N/A	#N/A	#N/A	#N/A	#N/A	#N/A	#N/A	#N/A	#N/A	#N/A	#N/A	#N/A	#N/A	#N/A	#N/A
1993Q4	#N/A	#N/A	#N/A	#N/A	#N/A	#N/A	#N/A	#N/A	#N/A	#N/A	#N/A	#N/A	#N/A	#N/A	#N/A
1994Q1	#N/A	#N/A	#N/A	#N/A	#N/A	#N/A	#N/A	#N/A	#N/A	#N/A	#N/A	#N/A	#N/A	#N/A	#N/A
1994Q2	#N/A	#N/A	#N/A	#N/A	#N/A	#N/A	#N/A	#N/A	#N/A	#N/A	#N/A	#N/A	#N/A	#N/A	#N/A
1994Q3	#N/A	#N/A	#N/A	#N/A	#N/A	#N/A	#N/A	#N/A	#N/A	#N/A	#N/A	#N/A	#N/A	#N/A	#N/A
1994Q4	#N/A	#N/A	#N/A	#N/A	#N/A	#N/A	#N/A	#N/A	#N/A	#N/A	#N/A	#N/A	#N/A	#N/A	#N/A
1995Q1	#N/A	#N/A	#N/A	#N/A	#N/A	#N/A	#N/A	#N/A	#N/A	#N/A	#N/A	#N/A	#N/A	#N/A	#N/A
1995Q2	#N/A	#N/A	#N/A	#N/A	#N/A	#N/A	#N/A	#N/A	#N/A	#N/A	#N/A	#N/A	#N/A	#N/A	#N/A
1995Q3	#N/A	#N/A	#N/A	#N/A	#N/A	#N/A	#N/A	#N/A	#N/A	#N/A	#N/A	#N/A	#N/A	#N/A	#N/A
1995Q4	#N/A	#N/A	#N/A	#N/A	#N/A	#N/A	#N/A	#N/A	#N/A	#N/A	#N/A	#N/A	#N/A	#N/A	#N/A
1996Q1	#N/A	#N/A	#N/A	#N/A	#N/A	#N/A	#N/A	#N/A	#N/A	#N/A	#N/A	#N/A	#N/A	#N/A	#N/A
1996Q2	#N/A	#N/A	#N/A	#N/A	#N/A	#N/A	#N/A	#N/A	#N/A	#N/A	#N/A	#N/A	#N/A	#N/A	#N/A
1996Q3	#N/A	#N/A	#N/A	#N/A	#N/A	#N/A	#N/A	#N/A	#N/A	#N/A	#N/A	#N/A	#N/A	#N/A	#N/A
1996Q4	#N/A	#N/A	#N/A	#N/A	#N/A	#N/A	#N/A	#N/A	#N/A	#N/A	#N/A	#N/A	#N/A	#N/A	#N/A
1997Q1	#N/A	#N/A	#N/A	#N/A	#N/A	#N/A	#N/A	#N/A	#N/A	#N/A	#N/A	#N/A	#N/A	#N/A	#N/A
1997Q2	#N/A	#N/A	#N/A	#N/A	#N/A	#N/A	#N/A	#N/A	#N/A	#N/A	#N/A	#N/A	#N/A	#N/A	#N/A
1997Q3	#N/A	#N/A	#N/A	#N/A	#N/A	#N/A	#N/A	#N/A	#N/A	#N/A	#N/A	#N/A	#N/A	#N/A	#N/A
1997Q4	#N/A	#N/A	#N/A	#N/A	#N/A	#N/A	#N/A	#N/A	#N/A	#N/A	#N/A	#N/A	#N/A	#N/A	#N/A
1998Q1	#N/A	#N/A	#N/A	#N/A	#N/A	#N/A	#N/A	#N/A	#N/A	#N/A	#N/A	#N/A	#N/A	#N/A	#N/A
1998Q2	#N/A	#N/A	#N/A	#N/A	#N/A	#N/A	#N/A	#N/A	#N/A	#N/A	#N/A	#N/A	#N/A	#N/A	#N/A
1998Q3	#N/A	#N/A	#N/A	#N/A	#N/A	#N/A	#N/A	#N/A	#N/A	#N/A	#N/A	#N/A	#N/A	#N/A	#N/A
1998Q4	#N/A	#N/A	#N/A	#N/A	#N/A	#N/A	#N/A	#N/A	#N/A	#N/A	#N/A	#N/A	#N/A	#N/A	#N/A
1999Q1	#N/A	#N/A	#N/A	#N/A	#N/A	#N/A	#N/A	#N/A	#N/A	#N/A	#N/A	#N/A	#N/A	#N/A	#N/A
1999Q2	#N/A	#N/A	#N/A	#N/A	#N/A	#N/A	#N/A	#N/A	#N/A	#N/A	#N/A	#N/A	#N/A	#N/A	#N/A
1999Q3	#N/A	#N/A	#N/A	#N/A	#N/A	#N/A	#N/A	#N/A	#N/A	#N/A	#N/A	#N/A	#N/A	#N/A	#N/A
1999Q4	#N/A	#N/A	#N/A	#N/A	#N/A	#N/A	#N/A	#N/A	#N/A	#N/A	#N/A	#N/A	#N/A	#N/A	#N/A
2000Q1	#N/A	#N/A	#N/A	#N/A	#N/A	#N/A	#N/A	#N/A	#N/A	#N/A	#N/A	#N/A	#N/A	#N/A	#N/A
2000Q2	#N/A	#N/A	#N/A	#N/A	#N/A	#N/A	#N/A	#N/A	#N/A	#N/A	#N/A	#N/A	#N/A	#N/A	#N/A
2000Q3	#N/A	#N/A	#N/A	#N/A	#N/A	#N/A	#N/A	#N/A	#N/A	#N/A	#N/A	#N/A	#N/A	#N/A	#N/A
2000Q4	#N/A	#N/A	#N/A	#N/A	#N/A	#N/A	#N/A	#N/A	#N/A	#N/A	#N/A	#N/A	#N/A	#N/A	#N/A
2001Q1	#N/A	#N/A	#N/A	#N/A	#N/A	#N/A	#N/A	#N/A	#N/A	#N/A	#N/A	#N/A	#N/A	#N/A	#N/A
2001Q2	#N/A	#N/A	#N/A	#N/A	#N/A	#N/A	#N/A	#N/A	#N/A	#N/A	#N/A	#N/A	#N/A	#N/A	#N/A
2001Q3	#N/A	#N/A	#N/A	#N/A	#N/A	#N/A	#N/A	#N/A	#N/A	#N/A	#N/A	#N/A	#N/A	#N/A	#N/A
2001Q4	#N/A	#N/A	#N/A	#N/A	#N/A	#N/A	#N/A	#N/A	#N/A	#N/A	#N/A	#N/A	#N/A	#N/A	#N/A
2002Q1	#N/A	#N/A	#N/A	#N/A	#N/A	#N/A	#N/A	#N/A	#N/A	#N/A	#N/A	#N/A	#N/A	#N/A	#N/A
2002Q2	#N/A	#N/A	#N/A	#N/A	#N/A	#N/A	#N/A	#N/A	#N/A	#N/A	#N/A	#N/A	#N/A	#N/A	#N/A
2002Q3	#N/A	#N/A	#N/A	#N/A	#N/A	#N/A	#N/A	#N/A	#N/A	#N/A	#N/A	#N/A	#N/A	#N/A	#N/A
2002Q4	#N/A	#N/A	#N/A	#N/A	#N/A	#N/A	#N/A	#N/A	#N/A	#N/A	#N/A	#N/A	#N/A	#N/A	#N/A
2003Q1	#N/A	#N/A	#N/A	#N/A	#N/A	#N/A	#N/A	#N/A	#N/A	#N/A	#N/A	#N/A	#N/A	#N/A	#N/A
2003Q2	#N/A	#N/A	#N/A	#N/A	#N/A	#N/A	#N/A	#N/A	#N/A	#N/A	#N/A	#N/A	#N/A	#N/A	#N/A
2003Q3	#N/A	#N/A	#N/A	#N/A	#N/A	#N/A	#N/A	#N/A	#N/A	#N/A	#N/A	#N/A	#N/A	#N/A	#N/A
2003Q4	130020	130280	260	130420	130730	310	130700	131339	639	131100	131882	782	131486	132689	1203
2004Q1	130229	130368	139	130640	130865	225	131095	131581	486	131545	132242	697	132058	133064	1006
2004Q2	130856	131102	246	131378	131794	416	131898	132492	595	132392	133140	748.5	132909	133956	1047
2004Q3	131400	131714	314	131900	132397	497	132425	133056	631	132901	133614	713	133327	134367	1040
2004Q4	131860	132170	311	132370	132776	405.5	132878	133358	480.5	133356	133990	634.5	133851	134516	665.5
2005Q1	132554	132629	75	133036	133270	234	133500	133818	318	133965	134511	546	134455	135153	698
2005Q2	133297	133478	181.5	133804	134022	217	134289	134644	355	134772	135292	520	135251	135854	603.5
2005Q3	133915	134005	90	134424	134608	184	134903	135205	302	135356	135795	439	135770	136350	580
2005Q4	134220	134316	95.5	134702	134961	259.5	135144	135587	443.5	135624	136205	580.5	136100	136704	604
2006Q1	134743	134934	191	135196	135499	303	135671	136092	421	136100	136647	547	136504	137156	652
2006Q2	135222	135298	77	135690	135846	156.5	136056	136373	316.5	136445	136886	441.5	136802	137392	589.5
2006Q3	135450	135556	106.012	135780	135994	214.438	136036	136434	398.243	136393	136854	461	136633	137250	617
2006Q4	135817	135949	131.815	136174	136348	174.381	136439	136743	303.727	136801	137161	359.859	137067	137567	499.967
2007Q1	136398	136491	93.2276	136700	136933	233.361	137034	137375	341.757	137327	137851	524.426	137627	138277	650.128
2007Q2	137778	137876	97.5798	138006	138249	242.6	138327	138614	287	138658	139010	352.219	139075	139500	425
2007Q3	138174	138320	146.623	138459	138670	210.422	138802	139047	245.486	139155	139463	307.352	139468	139919	451.528
2007Q4	138435	138533	98.0007	138645	138862	216.684	138891	139224	332.676	139127	139587	459.732	139450	139993	543.6
2008Q1	138490	138652	162.071	138540	138851	310.901	138578	139092	513.487	138701	139455	754.184	138895	139802	907.11
2008Q2	137729	137864	135	137586	137925	338.22	137690	138030	339.999	137722	138325	603.223	137796	138646	849.822
2008Q3	137450	137599	148.607	137248	137558	310.179	137113	137648	535.283	137091	137810	718.386	137061	138031	969.61
2008Q4	136658	136892	234.003	136000	136363	363	135530	136071	540.667	135254	136021	767	135100	136106	1006
2009Q1	134311	134651	340.876	133164	133892	728.117	132622	133566	943.88	132321	133766	1445.88	132202	133967	1764.88
2009Q2	131991	132318	326.167	131097	131725	628.323	130794	131412	618.412	130684	131720	1036.02	130797	132084	1286.91
2009Q3	131200	131417	217	130647	131331	684.333	130449	131534	1085.31	130796	132143	1346.63	131145	132645	1499.67
2009Q4	130600	130785	185.333	130423	130735	312.747	130495	131100	604.87	130701	131500	799.227	131188	132025	836.471
2010Q1	130888	131116	228.216	131051	131750	698.06	131227	132110	883.735	131394	132500	1106.67	131797	133099	1302.02
2010Q2	130112	130447	335	130482	130845	362.827	130825	131358	533	131252	132136	884	131730	133232	1501.73
2010Q3	130270	130670	399.68	130510	131026	515.62	131062	131465	403.484	131595	132100	505	132045	132900	855
2010Q4	130420	130654	234.464	130625	131030	404.594	131060	131453	392.509	131460	132091	630.671	131949	132808	858.64
2011Q1	130971	131124	152.96	131387	131712	325.249	131824	132426	602.01	132400	133207	807.233	132902	133893	990.404
2011Q2	130950	131216	265.667	131439	131900	460.601	131905	132513	608.339	132400	133167	767	132943	133955	1012.01
2011Q3	131250	131450	200	131626	131999	372.626	131964	132566	602.143	132466	133041	575.307	132633	133637	1004.19
2011Q4	131482	131650	168.107	131785	132094	308.771	132082	132554	472.013	132381	133060	679.273	132635	133498	863.209
2012Q1	132126	132322	195.472	132521	132777	256.036	132939	133242	302.901	133380	133704	324.397	133829	134177	348.13
2012Q2	133123	133220	96.9844	133559	133784	224.866	134028	134395	367	134500	134964	464.085	135100	135540	440
2012Q3	133331	133441	110.279	133674	133904	230.062	134007	134388	381.331	134440	134898	457.916	134866	135509	643
2012Q4	133735	133890	154.8	134074	134323	249.04	134456	134860	403.969	134825	135381	555.7	135250	135910	660.4
2013Q1	134254	134407	152.128	134626	134922	296.192	135072	135462	389.56	135511	136006	494.288	135950	136557	607.11
2013Q2	135484	135632	148.554	135888	136157	268.586	136350	136785	435.305	136875	137332	457	137387	137897	509.764
2013Q3	136180	136247	67.4989	136659	136822	162.366	137154	137388	234	137676	138087	410.581	138173	138700	526.815
2013Q4	136670	136744	74.2398	137170	137325	154.804	137746	137957	210.811	138186	138600	413.6	138606	139263	656.8
2014Q1	137206	137311	104.03	137736	137924	188.053	138264	138526	261.848	138804	139186	382.711	139500	139875	375
2014Q2	138379	138452	73.1914	138908	139107	199.12	139490	139745	255.116	140050	140415	364.379	140628	141131	502.646
2014Q3	139136	139235	98.9358	139717	139936	218.402	140238	140660	422	140763	141389	626	141338	142030	692.5
2014Q4	139820	139910	89.6667	140345	140595	249.528	140860	141270	409.667	141422	141970	547.296	141940	142658	718.323
2015Q1	140777	140902	124.973	141446	141635	188.984	142030	142377	347	142500	143067	567	143000	143751	751
2015Q2	141567	141658	91	142111	142344	232.894	142629	143060	430.796	143133	143784	650.849	143623	144497	874.113
2015Q3	142228	142296	67.6809	142817	142979	162.06	143440	143637	196.529	143956	144271	314.967	144438	144944	505.358
2015Q4	142801	142854	53.0977	143306	143466	159.367	143859	144072	213.084	144290	144664	374	144722	145301	578.773
2016Q1	143475	143584	109.072	144014	144219	205.583	144433	144786	352.252	144914	145332	417.354	145290	145846	556.366
2016Q2	144040	144161	121.032	144512	144769	257.346	144971	145362	390.235	145323	145938	614.843	145799	146477	677.534
2016Q3	144427	144613	186	144902	145171	269.346	145339	145704	365.499	145760	146230	470.452	146179	146710	531.302
2016Q4	145087	145150	63	145536	145700	163.947	146053	146230	176.671	146537	146732	195	146930	147272	342
2017Q1	145626	145706	79.8534	146091	146232	140.788	146532	146785	252.599	147016	147380	364.574	147460	147880	419.56
2017Q2	146224	146322	98	146722	146855	133	147210	147393	182.577	147629	147942	313.216	148074	148482	408.251
2017Q3	146704	146793	88.8767	147147	147323	176.308	147579	147830	251.022	148030	148329	298.75	148454	148895	441
2017Q4	147138	147268	130.14	147593	147807	214	148017	148317	299.87	148399	148862	462.683	148816	149297	481.461
2018Q1	147692	147765	73.0969	148178	148313	135	148645	148841	196.102	149131	149360	228.974	149495	149859	364.161
2018Q2	148580	148638	57.829	149090	149235	145.339	149553	149790	237	149953	150333	380.123	150303	150851	548.151
2018Q3	149244	149314	69.4245	149728	149874	146	150186	150431	245.143	150616	150908	291.716	150998	151405	407.361
2018Q4	149881	149946	65.2907	150351	150522	171.133	150786	151066	279.5	151180	151616	436.742	151548	152108	560.631
2019Q1	150608	150666	57.5	151065	151215	150.061	151426	151756	329.932	151788	152270	482.471	152164	152718	553.778
2019Q2	151192	151286	93.8291	151659	151811	151.843	152025	152321	295.788	152408	152802	393.588	152718	153378	659.98
2019Q3	151551	151613	62.3787	151951	152065	113.763	152309	152531	221.842	152634	152950	316.312	152954	153381	427.424
2019Q4	151990	152107	116.55	152375	152562	186.596	152767	153108	341	152914	153469	555.166	153133	153885	752.333
2020Q1	152702	152769	66.171	153173	153352	179.287	153423	153692	268.752	153790	154144	353.695	154091	154623	531.484
2020Q2	126993	134905	7912	131000	141135	10135	135097	143230	8133.24	136127	146134	10006.8	137122	148000	10878
2020Q3	137713	140591	2877.6	138966	143749	4782.65	140136	145702	5565.6	140322	147967	7644.69	141358	148967	7609.33
2020Q4	142400	143173	772.754	143187	145430	2242.23	144523	146850	2326.6	144973	147673	2700	145567	148600	3032.27
2021Q1	142818	143274	455.372	143759	144811	1052.47	144698	147090	2392.12	145590	148800	3210.24	146290	150162	3871.91
2021Q2	144456	145675	1219	145820	147967	2147.06	146894	149508	2614.01	148032	150791	2759.7	148860	151824	2964.33
2021Q3	146732	147591	858.985	148022	149621	1598.79	149021	150898	1876.64	149807	151821	2014	150528	152789	2261.07
2021Q4	148372	149002	629.789	149346	150490	1144.26	150308	151734	1426.77	151128	152559	1431.21	151735	153460	1724.81

## Sheet: HOUSING
Measures of Cross-Sectional Dispersion for Quarterly Forecasts for NEW PRIVATE HOUSING STARTS (HOUSING)
Units: SAAR, Mils. Units
Dispersion Measure D1 = 75th Percentile Minus 25th Percentile of the Forecasts for Levels
P25 = 25th Percentile of the Forecasts for Levels
P75 = 75th Percentile of the Forecasts for Levels
At Each Survey Date T, the Quarterly Horizons Are T, T+1, T+2, T+3, and T+4
Survey_Date(T)	HOUSING_P25_D1(T)	HOUSING_P75_D1(T)	HOUSING_D1(T)	HOUSING_P25_D1(T+1)	HOUSING_P75_D1(T+1)	HOUSING_D1(T+1)	HOUSING_P25_D1(T+2)	HOUSING_P75_D1(T+2)	HOUSING_D1(T+2)	HOUSING_P25_D1(T+3)	HOUSING_P75_D1(T+3)	HOUSING_D1(T+3)	HOUSING_P25_D1(T+4)	HOUSING_P75_D1(T+4)	HOUSING_D1(T+4)
1968Q4	1.5	1.55	0.05	1.5	1.6	0.1	1.55	1.62	0.07	1.6	1.7	0.1	1.62	1.75	0.13
1969Q1	1.5	1.6	0.1	1.5	1.6	0.1	1.55	1.65	0.1	1.6	1.7	0.1	#N/A	#N/A	#N/A
1969Q2	1.55	1.6	0.05	1.5	1.6	0.1	1.5	1.63	0.13	1.55	1.7	0.15	#N/A	#N/A	#N/A
1969Q3	1.35	1.45	0.1	1.3	1.45	0.15	1.39	1.52	0.13	1.42	1.68	0.26	#N/A	#N/A	#N/A
1969Q4	1.255	1.325	0.07	1.2	1.3	0.1	1.25	1.4	0.15	1.34	1.525	0.185	1.42	1.655	0.235
1970Q1	1.2	1.25	0.05	1.2	1.31	0.11	1.3	1.45	0.15	1.35	1.6	0.25	#N/A	#N/A	#N/A
1970Q2	1.23	1.3	0.07	1.3	1.41	0.11	1.35	1.5	0.15	1.4	1.55	0.15	1.45	1.6	0.15
1970Q3	1.3	1.4	0.1	1.35	1.5	0.15	1.4	1.585	0.185	1.495	1.68	0.185	1.55	1.7	0.15
1970Q4	1.53	1.6	0.07	1.58	1.7	0.12	1.62	1.74	0.12	1.65	1.8	0.15	1.68	1.8	0.12
1971Q1	1.7	1.85	0.15	1.79	1.9	0.11	1.8	1.95	0.15	1.8	2	0.2	1.8	2	0.2
1971Q2	1.805	1.9	0.095	1.82	1.94	0.12	1.83	1.97	0.14	1.885	2	0.115	1.87	2	0.13
1971Q3	1.9	2.05	0.15	1.9	2.05	0.15	1.93	2.1	0.17	1.9	2.125	0.225	1.9	2.16	0.26
1971Q4	2	2.1	0.1	2	2.15	0.15	2	2.2	0.2	2	2.2	0.2	1.95	2.15	0.2
1972Q1	2.1	2.3	0.2	2.1	2.28	0.18	2.05	2.26	0.21	1.98	2.2	0.22	1.9	2.205	0.305
1972Q2	2.28	2.4	0.12	2.14	2.3	0.16	2.05	2.25	0.2	2	2.2	0.2	1.93	2.15	0.22
1972Q3	2.15	2.21	0.06	2.1	2.2	0.1	2	2.11	0.11	1.95	2.1	0.15	1.9	2.1	0.2
1972Q4	2.26	2.35	0.09	2.165	2.28	0.115	2.1	2.205	0.105	2	2.155	0.155	1.9	2.1	0.2
1973Q1	2.27	2.375	0.105	2.12	2.3	0.18	2.045	2.215	0.17	1.95	2.195	0.245	1.9	2.1	0.2
1973Q2	2.2	2.3	0.1	2.05	2.275	0.225	1.995	2.16	0.165	1.9	2.075	0.175	1.895	2.005	0.11
1973Q3	1.89	2	0.11	1.8	1.97	0.17	1.75	1.96	0.21	1.8	2	0.2	1.82	2.025	0.205
1973Q4	1.6	1.79	0.19	1.5	1.7	0.2	1.5	1.7	0.2	1.6	1.8	0.2	1.69	1.9	0.21
1974Q1	1.4	1.5	0.1	1.45	1.6	0.15	1.57	1.75	0.18	1.65	1.89	0.24	1.75	2	0.25
1974Q2	1.5	1.605	0.105	1.575	1.7	0.125	1.63	1.8	0.17	1.65	1.9	0.25	1.75	2	0.25
1974Q3	1.43	1.55	0.12	1.45	1.6	0.15	1.5	1.7	0.2	1.58	1.8	0.22	#N/A	#N/A	#N/A
1974Q4	1.05	1.1	0.05	1.1	1.2	0.1	1.2	1.4	0.2	1.3	1.59	0.29	1.41	1.75	0.34
1975Q1	0.97	1.05	0.08	1.05	1.265	0.215	1.165	1.475	0.31	1.3	1.62	0.32	1.4	1.8	0.4
1975Q2	1	1.11	0.11	1.16	1.3	0.14	1.28	1.575	0.295	1.35	1.7	0.35	1.41	1.8	0.39
1975Q3	1.135	1.25	0.115	1.21	1.43	0.22	1.345	1.6	0.255	1.4	1.7	0.3	1.5	1.805	0.305
1975Q4	1.3	1.37	0.07	1.35	1.5	0.15	1.4	1.6	0.2	1.5	1.65	0.15	1.55	1.7	0.15
1976Q1	1.39	1.45	0.06	1.45	1.55	0.1	1.5	1.65	0.15	1.55	1.75	0.2	1.6	1.78	0.18
1976Q2	1.5	1.55	0.05	1.55	1.65	0.1	1.6	1.76	0.16	1.65	1.8	0.15	1.7	1.85	0.15
1976Q3	1.5	1.57	0.07	1.57	1.63	0.06	1.6	1.7	0.1	1.6	1.76	0.16	1.6	1.8	0.2
1976Q4	1.6	1.7	0.1	1.64	1.72	0.08	1.68	1.8	0.12	1.7	1.83	0.13	1.7	1.88	0.18
1977Q1	1.7	1.84	0.14	1.79	1.9	0.11	1.8	1.93	0.13	1.8	1.98	0.18	1.8	2	0.2
1977Q2	1.85	1.95	0.1	1.88	2	0.12	1.9	2	0.1	1.89	2	0.11	1.86	2	0.14
1977Q3	1.89	1.95	0.06	1.83	1.97	0.14	1.82	1.96	0.14	1.8	2	0.2	1.75	2	0.25
1977Q4	1.9	2.015	0.115	1.835	2	0.165	1.8	2	0.2	1.765	1.9	0.135	1.7	1.9	0.2
1978Q1	1.95	2.13	0.18	1.9	2.05	0.15	1.8	2.08	0.28	1.74	1.95	0.21	1.7	1.9	0.2
1978Q2	1.9	2	0.1	1.8	1.955	0.155	1.7	1.925	0.225	1.65	1.845	0.195	1.66	1.805	0.145
1978Q3	1.87	2.04	0.17	1.76	1.95	0.19	1.64	1.9	0.26	1.63	1.82	0.19	1.65	1.77	0.12
1978Q4	1.95	2	0.05	1.75	1.9	0.15	1.6	1.86	0.26	1.55	1.78	0.23	1.56	1.74	0.18
1979Q1	1.75	2	0.25	1.65	1.86	0.21	1.6	1.75	0.15	1.58	1.73	0.15	1.6	1.8	0.2
1979Q2	1.635	1.77	0.135	1.6	1.7	0.1	1.5	1.7	0.2	1.51	1.715	0.205	1.55	1.8	0.25
1979Q3	1.65	1.715	0.065	1.52	1.625	0.105	1.46	1.64	0.18	1.55	1.69	0.14	1.65	1.8	0.15
1979Q4	1.6	1.7	0.1	1.4	1.51	0.11	1.32	1.5	0.18	1.36	1.6	0.24	1.47	1.7	0.23
1980Q1	1.38	1.48	0.1	1.28	1.45	0.17	1.2	1.5	0.3	1.3	1.6	0.3	1.4	1.6	0.2
1980Q2	0.9	1.05	0.15	0.9	1.12	0.22	1	1.2	0.2	1.08	1.4	0.32	1.2	1.5	0.3
1980Q3	1.1	1.2	0.1	1.2	1.3	0.1	1.2	1.45	0.25	1.3	1.56	0.26	1.4	1.7	0.3
1980Q4	1.27	1.4	0.13	1.25	1.4	0.15	1.35	1.5	0.15	1.45	1.6	0.15	1.5	1.7	0.2
1981Q1	1.3	1.45	0.15	1.35	1.5	0.15	1.42	1.6	0.18	1.5	1.7	0.2	1.5	1.8	0.3
1981Q2	1.26	1.37	0.11	1.3	1.5	0.2	1.35	1.53	0.18	1.4	1.7	0.3	1.5	1.79	0.29
1981Q3	1.01	1.1	0.09	1.15	1.2	0.05	1.2	1.4	0.2	1.345	1.515	0.17	1.405	1.615	0.21
1981Q4	0.87	0.95	0.08	0.95	1.05	0.1	1	1.25	0.25	1.17	1.4	0.23	1.21	1.5	0.29
1982Q1	0.9	0.98	0.08	1	1.13	0.13	1.1	1.25	0.15	1.2	1.39	0.19	1.24	1.4	0.16
1982Q2	0.92	1	0.08	0.99	1.15	0.16	1.08	1.3	0.22	1.15	1.315	0.165	1.2	1.385	0.185
1982Q3	1	1.1	0.1	1.1	1.2	0.1	1.115	1.25	0.135	1.15	1.305	0.155	1.2	1.405	0.205
1982Q4	1.1	1.19	0.09	1.16	1.25	0.09	1.2	1.365	0.165	1.275	1.45	0.175	1.25	1.525	0.275
1983Q1	1.3	1.4	0.1	1.4	1.5	0.1	1.44	1.57	0.13	1.5	1.6	0.1	1.48	1.64	0.16
1983Q2	1.55	1.6	0.05	1.57	1.7	0.13	1.6	1.7	0.1	1.65	1.73	0.08	1.7	1.8	0.1
1983Q3	1.6	1.72	0.12	1.5	1.69	0.19	1.52	1.7	0.18	1.64	1.73	0.09	1.65	1.78	0.13
1983Q4	1.6	1.7	0.1	1.6	1.75	0.15	1.6	1.8	0.2	1.7	1.82	0.12	1.7	1.8	0.1
1984Q1	1.66	1.77	0.11	1.7	1.8	0.1	1.68	1.8	0.12	1.65	1.78	0.13	1.6	1.755	0.155
1984Q2	1.75	1.85	0.1	1.7	1.8	0.1	1.65	1.8	0.15	1.61	1.76	0.15	1.57	1.7	0.13
1984Q3	1.73	1.8	0.07	1.63	1.75	0.12	1.57	1.72	0.15	1.56	1.7	0.14	1.5	1.73	0.23
1984Q4	1.6	1.7	0.1	1.6	1.72	0.12	1.6	1.75	0.15	1.54	1.76	0.22	1.5	1.8	0.3
1985Q1	1.6	1.7	0.1	1.645	1.77	0.125	1.655	1.845	0.19	1.6	1.9	0.3	1.56	1.85	0.29
1985Q2	1.81	1.87	0.06	1.8	1.9	0.1	1.7	1.89	0.19	1.675	1.85	0.175	1.6	1.835	0.235
1985Q3	1.71	1.83	0.12	1.74	1.84	0.1	1.7	1.84	0.14	1.68	1.82	0.14	1.6	1.82	0.22
1985Q4	1.7	1.78	0.08	1.71	1.8	0.09	1.7	1.8	0.1	1.74	1.85	0.11	1.72	1.89	0.17
1986Q1	1.75	1.86	0.11	1.75	1.87	0.12	1.77	1.91	0.14	1.75	1.9	0.15	1.73	1.84	0.11
1986Q2	1.95	2.015	0.065	1.9	2.08	0.18	1.865	2.01	0.145	1.79	1.945	0.155	1.75	1.93	0.18
1986Q3	1.83	1.89	0.06	1.8	1.9	0.1	1.78	1.9	0.12	1.75	1.915	0.165	1.735	1.9	0.165
1986Q4	1.7	1.795	0.095	1.7	1.785	0.085	1.69	1.78	0.09	1.7	1.8	0.1	1.7	1.775	0.075
1987Q1	1.7	1.74	0.04	1.69	1.75	0.06	1.67	1.75	0.08	1.65	1.76	0.11	1.65	1.76	0.11
1987Q2	1.7	1.8	0.1	1.67	1.755	0.085	1.655	1.715	0.06	1.63	1.735	0.105	1.62	1.705	0.085
1987Q3	1.6	1.65	0.05	1.6	1.67	0.07	1.59	1.66	0.07	1.58	1.68	0.1	1.58	1.68	0.1
1987Q4	1.54	1.6	0.06	1.5	1.6	0.1	1.5	1.6	0.1	1.5	1.66	0.16	1.5	1.6	0.1
1988Q1	1.46	1.55	0.09	1.47	1.55	0.08	1.48	1.6	0.12	1.49	1.6	0.11	1.47	1.62	0.15
1988Q2	1.5	1.55	0.05	1.47	1.56	0.09	1.44	1.52	0.08	1.4	1.51	0.11	1.4	1.5	0.1
1988Q3	1.46	1.5	0.04	1.42	1.49	0.07	1.39	1.47	0.08	1.36	1.48	0.12	1.36	1.47	0.11
1988Q4	1.43	1.5	0.07	1.4	1.5	0.1	1.4	1.5	0.1	1.4	1.5	0.1	1.4	1.47	0.07
1989Q1	1.5	1.56	0.06	1.45	1.5	0.05	1.42	1.5	0.08	1.4	1.5	0.1	1.4	1.475	0.075
1989Q2	1.4	1.48	0.08	1.39	1.48	0.09	1.38	1.46	0.08	1.41	1.5	0.09	1.405	1.505	0.1
1989Q3	1.351	1.42	0.069	1.39	1.46	0.07	1.38	1.5	0.12	1.35	1.53	0.18	1.35	1.57	0.22
1989Q4	1.3	1.4	0.1	1.35	1.45	0.1	1.38	1.5	0.12	1.4	1.53	0.13	1.45	1.55	0.1
1990Q1	1.35	1.4	0.05	1.36	1.44	0.08	1.37	1.47	0.1	1.36	1.48	0.12	1.36	1.49	0.13
1990Q2	1.325	1.39	0.065	1.29	1.39	0.1	1.28	1.39	0.11	1.25	1.449	0.199	1.25	1.5	0.25
1990Q3	1.15	1.2	0.05	1.15	1.2292	0.0792	1.19	1.275	0.085	1.2	1.3267	0.1267	1.2725	1.395	0.1225
1990Q4	1.054	1.1	0.046	1.01	1.12	0.11	1	1.16	0.16	1.1	1.207	0.107	1.14	1.29	0.15
1991Q1	0.976	1.03	0.054	1	1.1	0.1	1.065	1.174	0.109	1.11	1.25	0.14	1.157	1.3105	0.1535
1991Q2	0.95	1.033	0.083	1.025	1.12	0.095	1.08	1.21	0.13	1.15	1.29	0.14	1.19	1.31	0.12
1991Q3	1.049	1.1	0.051	1.1	1.188	0.088	1.1225	1.25	0.1275	1.17	1.3	0.13	1.2	1.3	0.1
1991Q4	1.04	1.09	0.05	1.06	1.133	0.073	1.105	1.215	0.11	1.15	1.29	0.14	1.153	1.315	0.162
1992Q1	1.1	1.152	0.052	1.148	1.2	0.052	1.199	1.26	0.061	1.22	1.31	0.09	1.205	1.345	0.14
1992Q2	1.25	1.316	0.066	1.25	1.35	0.1	1.276	1.4	0.124	1.275	1.4	0.125	1.309	1.42	0.111
1992Q3	1.18	1.233	0.053	1.22	1.3	0.08	1.26	1.35	0.09	1.28	1.38	0.1	1.289	1.39	0.101
1992Q4	1.221	1.28	0.059	1.25	1.35	0.1	1.29	1.38	0.09	1.3	1.42	0.12	1.339	1.4	0.061
1993Q1	1.2615	1.31	0.0485	1.2875	1.3395	0.052	1.303	1.39	0.087	1.318	1.405	0.087	1.325	1.407	0.082
1993Q2	1.225	1.31	0.085	1.27	1.35	0.08	1.3	1.39	0.09	1.3	1.4	0.1	1.32	1.416	0.096
1993Q3	1.256	1.32	0.064	1.275	1.36	0.085	1.29	1.39	0.1	1.304	1.4	0.096	1.3	1.4	0.1
1993Q4	1.325	1.38	0.055	1.32	1.384	0.064	1.35	1.403	0.053	1.35	1.42	0.07	1.36	1.42	0.06
1994Q1	1.375	1.44	0.065	1.4	1.465	0.065	1.4	1.462	0.062	1.393	1.46	0.067	1.37	1.468	0.098
1994Q2	1.3955	1.45	0.0545	1.361	1.416	0.055	1.35	1.413	0.063	1.345	1.407	0.062	1.305	1.42	0.115
1994Q3	1.38	1.42	0.04	1.35	1.41	0.06	1.339	1.4	0.061	1.3	1.4	0.1	1.32	1.4	0.08
1994Q4	1.4	1.46	0.06	1.37	1.4	0.03	1.34	1.39	0.05	1.33	1.386	0.056	1.315	1.399	0.084
1995Q1	1.4	1.451	0.051	1.35	1.41	0.06	1.33	1.385	0.055	1.313	1.37	0.057	1.3	1.353	0.053
1995Q2	1.266	1.3135	0.0475	1.284	1.346	0.062	1.2875	1.36	0.0725	1.2725	1.34	0.0675	1.25	1.37	0.12
1995Q3	1.28	1.348	0.068	1.3	1.367	0.067	1.2875	1.37	0.0825	1.2895	1.3625	0.073	1.27	1.36	0.09
1995Q4	1.389	1.425	0.036	1.38	1.413	0.033	1.367	1.408	0.041	1.342	1.4	0.058	1.33	1.41	0.08
1996Q1	1.341	1.407	0.066	1.36	1.42	0.06	1.35	1.402	0.052	1.3	1.389	0.089	1.3	1.39	0.09
1996Q2	1.395	1.47	0.075	1.36	1.431	0.071	1.31	1.4	0.09	1.292	1.4	0.108	1.28	1.39	0.11
1996Q3	1.42	1.455	0.035	1.3715	1.4325	0.061	1.3395	1.427	0.0875	1.33	1.42	0.09	1.32	1.42	0.1
1996Q4	1.411	1.4575	0.0465	1.39	1.45	0.06	1.3615	1.445	0.0835	1.3505	1.4375	0.087	1.35	1.4255	0.0755
1997Q1	1.39	1.43	0.04	1.36	1.437	0.077	1.36	1.42	0.06	1.331	1.4	0.069	1.334	1.407	0.073
1997Q2	1.4	1.45	0.05	1.37	1.444	0.074	1.35	1.43	0.08	1.35	1.41	0.06	1.335	1.411	0.076
1997Q3	1.409	1.459	0.05	1.38	1.45	0.07	1.36	1.449	0.089	1.35	1.44	0.09	1.34	1.44	0.1
1997Q4	1.421	1.46	0.039	1.4	1.467	0.067	1.4	1.467	0.067	1.38	1.45	0.07	1.38	1.447	0.067
1998Q1	1.47	1.53	0.06	1.444	1.52	0.076	1.43	1.52	0.09	1.4	1.51	0.11	1.384	1.5	0.116
1998Q2	1.5	1.58	0.08	1.47	1.569	0.099	1.411	1.545	0.134	1.4	1.507	0.107	1.395	1.493	0.098
1998Q3	1.511	1.58	0.069	1.47	1.5675	0.0975	1.4255	1.55	0.1245	1.412	1.529	0.117	1.39	1.5165	0.1265
1998Q4	1.54	1.602	0.062	1.48	1.6	0.12	1.45	1.55	0.1	1.422	1.523	0.101	1.41	1.5	0.09
1999Q1	1.6065	1.675	0.0685	1.545	1.65	0.105	1.502	1.619	0.117	1.4715	1.6	0.1285	1.462	1.575	0.113
1999Q2	1.658	1.75	0.092	1.6	1.71	0.11	1.54	1.676	0.136	1.5	1.67	0.17	1.499	1.651	0.152
1999Q3	1.5675	1.6275	0.06	1.5105	1.6	0.0895	1.4935	1.5895	0.096	1.4685	1.5615	0.093	1.452	1.557	0.105
1999Q4	1.575	1.62	0.045	1.53	1.6	0.07	1.52	1.58	0.06	1.5	1.58	0.08	1.48	1.57	0.09
2000Q1	1.571	1.64	0.069	1.54	1.615	0.075	1.5	1.6	0.1	1.48	1.56	0.08	1.456	1.568	0.112
2000Q2	1.613	1.69	0.077	1.55	1.65	0.1	1.521	1.6	0.079	1.493	1.61	0.117	1.4825	1.6	0.1175
2000Q3	1.53	1.6	0.07	1.489	1.58	0.091	1.454	1.55	0.096	1.45	1.55	0.1	1.44	1.553	0.113
2000Q4	1.499	1.55	0.051	1.48	1.54	0.06	1.48	1.539	0.059	1.475	1.557	0.082	1.475	1.577	0.102
2001Q1	1.51	1.56	0.05	1.5	1.564	0.064	1.5	1.572	0.072	1.5	1.6	0.1	1.51	1.6	0.09
2001Q2	1.549	1.613	0.064	1.506	1.613	0.107	1.5	1.613	0.113	1.52	1.623	0.103	1.54	1.643	0.103
2001Q3	1.5605	1.619	0.0585	1.5445	1.6065	0.062	1.5315	1.6185	0.087	1.535	1.6295	0.0945	1.535	1.624	0.089
2001Q4	1.487	1.56	0.073	1.45	1.565	0.115	1.465	1.577	0.112	1.5085	1.6015	0.093	1.5125	1.6075	0.095
2002Q1	1.524	1.588	0.064	1.517	1.583	0.066	1.5	1.6	0.1	1.51	1.6	0.09	1.53	1.601	0.071
2002Q2	1.581	1.6525	0.0715	1.555	1.6455	0.0905	1.534	1.643	0.109	1.55	1.646	0.096	1.563	1.65	0.087
2002Q3	1.607	1.66	0.053	1.595	1.66	0.065	1.59	1.65	0.06	1.578	1.66	0.082	1.581	1.65	0.069
2002Q4	1.644	1.7	0.056	1.605	1.682	0.077	1.6	1.683	0.083	1.59	1.7	0.11	1.6	1.7	0.1
2003Q1	1.655	1.715	0.06	1.6455	1.69	0.0445	1.618	1.6925	0.0745	1.6	1.69	0.09	1.6	1.677	0.077
2003Q2	1.675	1.725	0.05	1.644	1.71	0.066	1.603	1.709	0.106	1.57	1.7	0.13	1.598	1.7	0.102
2003Q3	1.7	1.731	0.031	1.65	1.737	0.087	1.625	1.713	0.088	1.623	1.7	0.077	1.62	1.69	0.07
2003Q4	1.775	1.847	0.072	1.7	1.8	0.1	1.67	1.78	0.11	1.65	1.76	0.11	1.63	1.75	0.12
2004Q1	1.88	1.999	0.119	1.8	1.92	0.12	1.74	1.88	0.14	1.675	1.85	0.175	1.645	1.82	0.175
2004Q2	1.864	1.9625	0.0985	1.809	1.889	0.08	1.73	1.856	0.126	1.667	1.807	0.14	1.685	1.8	0.115
2004Q3	1.845	1.903	0.058	1.75	1.885	0.135	1.702	1.85	0.148	1.7	1.842	0.142	1.7	1.81	0.11
2004Q4	1.885	1.946	0.061	1.838	1.91	0.072	1.8	1.877	0.077	1.75	1.863	0.113	1.718	1.854	0.136
2005Q1	1.9	1.9435	0.0435	1.85	1.9185	0.0685	1.81	1.9125	0.1025	1.77	1.913	0.143	1.742	1.875	0.133
2005Q2	1.959	2.03	0.071	1.9	2	0.1	1.85	1.97	0.12	1.788	1.926	0.138	1.75	1.9	0.15
2005Q3	1.9685	2.022	0.0535	1.9285	2.018	0.0895	1.875	1.9825	0.1075	1.82	1.962	0.142	1.8045	1.96	0.1555
2005Q4	1.9735	2.05	0.0765	1.9165	2.005	0.0885	1.821	1.995	0.174	1.785	1.969	0.184	1.775	1.922	0.147
2006Q1	1.95	2.025	0.075	1.88	1.995	0.115	1.82	1.96	0.14	1.8	1.95	0.15	1.78	1.928	0.148
2006Q2	1.9092	2.02	0.1108	1.8346	1.97	0.1354	1.7916	1.95	0.1584	1.7799	1.9419	0.162	1.75	1.93	0.18
2006Q3	1.8	1.856	0.056	1.75	1.85	0.1	1.74	1.85	0.11	1.7	1.8464	0.1464	1.7	1.841	0.141
2006Q4	1.6388	1.7097	0.0709	1.6	1.7077	0.1077	1.58	1.7	0.12	1.582	1.725	0.143	1.595	1.7338	0.1388
2007Q1	1.51	1.5933	0.0833	1.51	1.595	0.085	1.513	1.625	0.112	1.53	1.65	0.12	1.5768	1.7	0.1232
2007Q2	1.43	1.51	0.08	1.4	1.528	0.128	1.4029	1.5453	0.1424	1.45	1.565	0.115	1.477	1.571	0.094
2007Q3	1.387	1.45	0.063	1.35	1.45	0.1	1.325	1.45	0.125	1.35	1.487	0.137	1.375	1.509	0.134
2007Q4	1.18	1.2516	0.0717	1.1015	1.2432	0.1417	1.1	1.2554	0.1554	1.098	1.28	0.182	1.1407	1.3378	0.1971
2008Q1	1	1.1	0.1	0.97	1.08	0.11	0.9521	1.15	0.1979	1	1.2	0.2	1.059	1.26	0.201
2008Q2	0.9268	0.995	0.0682	0.88	1	0.12	0.896	1.04	0.144	0.943	1.0885	0.1455	1.0007	1.1083	0.1076
2008Q3	0.9	0.9943	0.0943	0.8599	1	0.1401	0.875	1.05	0.175	0.9	1.1	0.2	0.94	1.16	0.22
2008Q4	0.783	0.85	0.067	0.752	0.863	0.111	0.768	0.875	0.107	0.796	0.95	0.154	0.83	1	0.17
2009Q1	0.545	0.636	0.091	0.5265	0.63	0.1035	0.5717	0.674	0.1023	0.61	0.74	0.13	0.6697	0.838	0.1683
2009Q2	0.488	0.55	0.062	0.5076	0.61	0.1024	0.5461	0.67	0.1239	0.5992	0.8	0.2008	0.645	0.8717	0.2267
2009Q3	0.5608	0.605	0.0442	0.6	0.675	0.075	0.648	0.77	0.122	0.675	0.832	0.157	0.73	0.929	0.199
2009Q4	0.6	0.65	0.05	0.6415	0.7344	0.0929	0.6801	0.8	0.1199	0.7432	0.8679	0.1247	0.8074	0.9409	0.1335
2010Q1	0.59	0.627	0.037	0.628	0.718	0.09	0.67	0.8	0.13	0.715	0.89	0.175	0.76	1	0.24
2010Q2	0.625	0.665	0.04	0.664	0.75	0.086	0.689	0.82	0.131	0.7194	0.9	0.1806	0.772	1	0.228
2010Q3	0.58	0.64	0.06	0.614	0.685	0.071	0.6582	0.76	0.1018	0.69	0.8443	0.1543	0.728	0.925	0.197
2010Q4	0.5905	0.625	0.0345	0.625	0.665	0.04	0.65	0.72	0.07	0.675	0.81	0.135	0.71	0.882	0.172
2011Q1	0.55	0.588	0.038	0.5928	0.65	0.0572	0.628	0.7218	0.0938	0.67	0.8	0.13	0.69	0.885	0.195
2011Q2	0.5634	0.6	0.0366	0.59	0.65	0.06	0.611	0.7	0.089	0.6328	0.76	0.1272	0.65	0.825	0.175
2011Q3	0.58	0.61	0.03	0.591	0.65	0.059	0.605	0.675	0.07	0.62	0.72	0.1	0.637	0.76	0.123
2011Q4	0.608	0.633	0.025	0.62	0.641	0.021	0.6315	0.682	0.0505	0.65	0.7155	0.0655	0.6775	0.767	0.0895
2012Q1	0.66	0.69	0.03	0.6728	0.7051	0.0323	0.6885	0.7385	0.05	0.7	0.78	0.08	0.7243	0.8375	0.1132
2012Q2	0.685	0.71	0.025	0.7023	0.7415	0.0392	0.7099	0.78	0.0701	0.725	0.8358	0.1108	0.735	0.8637	0.1287
2012Q3	0.7482	0.775	0.0268	0.758	0.815	0.057	0.77	0.8524	0.0824	0.7998	0.9	0.1002	0.7989	0.94	0.1411
2012Q4	0.805	0.8419	0.0369	0.82	0.89	0.07	0.844	0.935	0.091	0.865	0.975	0.11	0.886	1.0103	0.1243
2013Q1	0.9	0.945	0.045	0.9162	0.9877	0.0715	0.9484	1.025	0.0766	0.975	1.09	0.115	0.9995	1.1484	0.1489
2013Q2	0.963	1.0108	0.0478	0.992	1.0576	0.0656	1.01	1.1122	0.1022	1.06	1.1671	0.1071	1.1	1.2458	0.1458
2013Q3	0.9216	0.9933	0.0717	0.965	1.0356	0.0706	1.002	1.11	0.108	1.01	1.167	0.157	1.025	1.217	0.192
2013Q4	0.9169	0.9875	0.0706	0.9375	1.07	0.1325	0.97	1.1368	0.1668	1.003	1.2028	0.1998	1.035	1.2632	0.2282
2014Q1	0.9837	1.06	0.0763	1.035	1.114	0.079	1.0614	1.1868	0.1254	1.1023	1.2525	0.1502	1.1344	1.3	0.1656
2014Q2	0.97	1.06	0.09	1.01	1.125	0.115	1.0372	1.1963	0.1591	1.0746	1.255	0.1804	1.1131	1.3	0.1869
2014Q3	0.993	1.035	0.042	1.0126	1.117	0.1044	1.05	1.172	0.122	1.1044	1.25	0.1456	1.1256	1.3	0.1744
2014Q4	1.035	1.075	0.04	1.045	1.125	0.08	1.0693	1.1833	0.114	1.0867	1.2333	0.1466	1.1	1.2697	0.1697
2015Q1	1.0691	1.1123	0.0431	1.101	1.1748	0.0738	1.135	1.2465	0.1115	1.1545	1.2883	0.1338	1.1938	1.3115	0.1177
2015Q2	1.0035	1.1	0.0965	1.0812	1.18	0.0988	1.101	1.2318	0.1308	1.09	1.2613	0.1713	1.135	1.31	0.175
2015Q3	1.1304	1.1911	0.0607	1.1584	1.2399	0.0815	1.1742	1.2725	0.0983	1.202	1.303	0.101	1.219	1.34	0.121
2015Q4	1.168	1.2239	0.0559	1.184	1.2498	0.0658	1.2077	1.2955	0.0878	1.2371	1.3243	0.0872	1.26	1.3552	0.0952
2016Q1	1.15	1.2	0.05	1.1853	1.2458	0.0605	1.1997	1.2786	0.0789	1.2151	1.31	0.0949	1.23	1.36	0.13
2016Q2	1.147	1.2	0.053	1.17	1.24	0.07	1.19	1.288	0.098	1.1924	1.3113	0.1189	1.2042	1.345	0.1408
2016Q3	1.1704	1.2075	0.0371	1.1866	1.2515	0.0649	1.1956	1.2914	0.0958	1.2058	1.34	0.1342	1.2139	1.3748	0.1609
2016Q4	1.1518	1.2033	0.0515	1.1743	1.2375	0.0632	1.191	1.27	0.079	1.194	1.2896	0.0956	1.1998	1.325	0.1252
2017Q1	1.2004	1.2481	0.0477	1.2208	1.2845	0.0637	1.2343	1.2959	0.0616	1.2369	1.345	0.1081	1.24	1.3612	0.1212
2017Q2	1.25	1.2967	0.0467	1.26	1.32	0.06	1.2648	1.35	0.0852	1.2679	1.3673	0.0994	1.2847	1.44	0.1553
2017Q3	1.2	1.2377	0.0377	1.2211	1.275	0.0539	1.24	1.283	0.043	1.25	1.337	0.087	1.255	1.3536	0.0986
2017Q4	1.181	1.2358	0.0548	1.2053	1.2655	0.0602	1.2265	1.2879	0.0614	1.225	1.3025	0.0775	1.2225	1.3225	0.1
2018Q1	1.246	1.28	0.034	1.26	1.3046	0.0446	1.257	1.3173	0.0603	1.261	1.3394	0.0784	1.25	1.3616	0.1116
2018Q2	1.29	1.34	0.05	1.2777	1.37	0.0923	1.2723	1.4	0.1277	1.281	1.4095	0.1285	1.298	1.4203	0.1223
2018Q3	1.2668	1.3033	0.0366	1.275	1.32	0.045	1.273	1.3409	0.0679	1.28	1.369	0.089	1.272	1.3882	0.1162
2018Q4	1.2315	1.2835	0.052	1.2444	1.2984	0.0539	1.2582	1.3157	0.0575	1.2631	1.3353	0.0722	1.2566	1.3383	0.0817
2019Q1	1.2005	1.25	0.0495	1.2015	1.279	0.0775	1.2211	1.2745	0.0534	1.2189	1.2875	0.0686	1.2133	1.3	0.0867
2019Q2	1.1803	1.24	0.0597	1.1918	1.265	0.0732	1.1925	1.2888	0.0963	1.2076	1.31	0.1024	1.205	1.305	0.1
2019Q3	1.24	1.29	0.05	1.24	1.2999	0.0599	1.23	1.305	0.075	1.233	1.3179	0.0849	1.237	1.3235	0.0865
2019Q4	1.27	1.3	0.03	1.26	1.3139	0.0539	1.267	1.3282	0.0612	1.2627	1.3377	0.075	1.25	1.3427	0.0927
2020Q1	1.344	1.456	0.112	1.33	1.4482	0.1182	1.3449	1.461	0.1161	1.346	1.467	0.121	1.335	1.49	0.155
2020Q2	0.765	1.088	0.323	0.9	1.2012	0.3012	0.9987	1.2488	0.2502	1.04	1.3	0.26	1.09	1.338	0.248
2020Q3	1.125	1.23	0.105	1.1426	1.3	0.1574	1.18	1.315	0.135	1.195	1.36	0.165	1.21	1.4023	0.1923
2020Q4	1.365	1.455	0.09	1.3569	1.4773	0.1204	1.3441	1.482	0.1379	1.342	1.488	0.146	1.3398	1.503	0.1632
2021Q1	1.4755	1.6079	0.1323	1.447	1.6129	0.1659	1.4606	1.647	0.1864	1.467	1.665	0.198	1.45	1.6675	0.2175
2021Q2	1.56	1.689	0.129	1.5501	1.67	0.1199	1.4939	1.6839	0.19	1.498	1.68	0.182	1.5	1.6813	0.1813
2021Q3	1.563	1.6604	0.0974	1.539	1.6805	0.1415	1.505	1.691	0.186	1.505	1.701	0.196	1.52	1.712	0.192
2021Q4	1.53	1.6129	0.0829	1.5156	1.622	0.1064	1.505	1.6671	0.1621	1.52	1.65	0.13	1.53	1.698	0.168

## Sheet: TBILL
Measures of Cross-Sectional Dispersion for Quarterly Forecasts for 3-MONTH TREASURY BILL RATE (TBILL)
Units: Percent p.a.
Dispersion Measure D1 = 75th Percentile Minus 25th Percentile of the Forecasts for Levels
P25 = 25th Percentile of the Forecasts for Levels
P75 = 75th Percentile of the Forecasts for Levels
At Each Survey Date T, the Quarterly Horizons Are T, T+1, T+2, T+3, and T+4
Survey_Date(T)	TBILL_P25_D1(T)	TBILL_P75_D1(T)	TBILL_D1(T)	TBILL_P25_D1(T+1)	TBILL_P75_D1(T+1)	TBILL_D1(T+1)	TBILL_P25_D1(T+2)	TBILL_P75_D1(T+2)	TBILL_D1(T+2)	TBILL_P25_D1(T+3)	TBILL_P75_D1(T+3)	TBILL_D1(T+3)	TBILL_P25_D1(T+4)	TBILL_P75_D1(T+4)	TBILL_D1(T+4)
1968Q4	#N/A	#N/A	#N/A	#N/A	#N/A	#N/A	#N/A	#N/A	#N/A	#N/A	#N/A	#N/A	#N/A	#N/A	#N/A
1969Q1	#N/A	#N/A	#N/A	#N/A	#N/A	#N/A	#N/A	#N/A	#N/A	#N/A	#N/A	#N/A	#N/A	#N/A	#N/A
1969Q2	#N/A	#N/A	#N/A	#N/A	#N/A	#N/A	#N/A	#N/A	#N/A	#N/A	#N/A	#N/A	#N/A	#N/A	#N/A
1969Q3	#N/A	#N/A	#N/A	#N/A	#N/A	#N/A	#N/A	#N/A	#N/A	#N/A	#N/A	#N/A	#N/A	#N/A	#N/A
1969Q4	#N/A	#N/A	#N/A	#N/A	#N/A	#N/A	#N/A	#N/A	#N/A	#N/A	#N/A	#N/A	#N/A	#N/A	#N/A
1970Q1	#N/A	#N/A	#N/A	#N/A	#N/A	#N/A	#N/A	#N/A	#N/A	#N/A	#N/A	#N/A	#N/A	#N/A	#N/A
1970Q2	#N/A	#N/A	#N/A	#N/A	#N/A	#N/A	#N/A	#N/A	#N/A	#N/A	#N/A	#N/A	#N/A	#N/A	#N/A
1970Q3	#N/A	#N/A	#N/A	#N/A	#N/A	#N/A	#N/A	#N/A	#N/A	#N/A	#N/A	#N/A	#N/A	#N/A	#N/A
1970Q4	#N/A	#N/A	#N/A	#N/A	#N/A	#N/A	#N/A	#N/A	#N/A	#N/A	#N/A	#N/A	#N/A	#N/A	#N/A
1971Q1	#N/A	#N/A	#N/A	#N/A	#N/A	#N/A	#N/A	#N/A	#N/A	#N/A	#N/A	#N/A	#N/A	#N/A	#N/A
1971Q2	#N/A	#N/A	#N/A	#N/A	#N/A	#N/A	#N/A	#N/A	#N/A	#N/A	#N/A	#N/A	#N/A	#N/A	#N/A
1971Q3	#N/A	#N/A	#N/A	#N/A	#N/A	#N/A	#N/A	#N/A	#N/A	#N/A	#N/A	#N/A	#N/A	#N/A	#N/A
1971Q4	#N/A	#N/A	#N/A	#N/A	#N/A	#N/A	#N/A	#N/A	#N/A	#N/A	#N/A	#N/A	#N/A	#N/A	#N/A
1972Q1	#N/A	#N/A	#N/A	#N/A	#N/A	#N/A	#N/A	#N/A	#N/A	#N/A	#N/A	#N/A	#N/A	#N/A	#N/A
1972Q2	#N/A	#N/A	#N/A	#N/A	#N/A	#N/A	#N/A	#N/A	#N/A	#N/A	#N/A	#N/A	#N/A	#N/A	#N/A
1972Q3	#N/A	#N/A	#N/A	#N/A	#N/A	#N/A	#N/A	#N/A	#N/A	#N/A	#N/A	#N/A	#N/A	#N/A	#N/A
1972Q4	#N/A	#N/A	#N/A	#N/A	#N/A	#N/A	#N/A	#N/A	#N/A	#N/A	#N/A	#N/A	#N/A	#N/A	#N/A
1973Q1	#N/A	#N/A	#N/A	#N/A	#N/A	#N/A	#N/A	#N/A	#N/A	#N/A	#N/A	#N/A	#N/A	#N/A	#N/A
1973Q2	#N/A	#N/A	#N/A	#N/A	#N/A	#N/A	#N/A	#N/A	#N/A	#N/A	#N/A	#N/A	#N/A	#N/A	#N/A
1973Q3	#N/A	#N/A	#N/A	#N/A	#N/A	#N/A	#N/A	#N/A	#N/A	#N/A	#N/A	#N/A	#N/A	#N/A	#N/A
1973Q4	#N/A	#N/A	#N/A	#N/A	#N/A	#N/A	#N/A	#N/A	#N/A	#N/A	#N/A	#N/A	#N/A	#N/A	#N/A
1974Q1	#N/A	#N/A	#N/A	#N/A	#N/A	#N/A	#N/A	#N/A	#N/A	#N/A	#N/A	#N/A	#N/A	#N/A	#N/A
1974Q2	#N/A	#N/A	#N/A	#N/A	#N/A	#N/A	#N/A	#N/A	#N/A	#N/A	#N/A	#N/A	#N/A	#N/A	#N/A
1974Q3	#N/A	#N/A	#N/A	#N/A	#N/A	#N/A	#N/A	#N/A	#N/A	#N/A	#N/A	#N/A	#N/A	#N/A	#N/A
1974Q4	#N/A	#N/A	#N/A	#N/A	#N/A	#N/A	#N/A	#N/A	#N/A	#N/A	#N/A	#N/A	#N/A	#N/A	#N/A
1975Q1	#N/A	#N/A	#N/A	#N/A	#N/A	#N/A	#N/A	#N/A	#N/A	#N/A	#N/A	#N/A	#N/A	#N/A	#N/A
1975Q2	#N/A	#N/A	#N/A	#N/A	#N/A	#N/A	#N/A	#N/A	#N/A	#N/A	#N/A	#N/A	#N/A	#N/A	#N/A
1975Q3	#N/A	#N/A	#N/A	#N/A	#N/A	#N/A	#N/A	#N/A	#N/A	#N/A	#N/A	#N/A	#N/A	#N/A	#N/A
1975Q4	#N/A	#N/A	#N/A	#N/A	#N/A	#N/A	#N/A	#N/A	#N/A	#N/A	#N/A	#N/A	#N/A	#N/A	#N/A
1976Q1	#N/A	#N/A	#N/A	#N/A	#N/A	#N/A	#N/A	#N/A	#N/A	#N/A	#N/A	#N/A	#N/A	#N/A	#N/A
1976Q2	#N/A	#N/A	#N/A	#N/A	#N/A	#N/A	#N/A	#N/A	#N/A	#N/A	#N/A	#N/A	#N/A	#N/A	#N/A
1976Q3	#N/A	#N/A	#N/A	#N/A	#N/A	#N/A	#N/A	#N/A	#N/A	#N/A	#N/A	#N/A	#N/A	#N/A	#N/A
1976Q4	#N/A	#N/A	#N/A	#N/A	#N/A	#N/A	#N/A	#N/A	#N/A	#N/A	#N/A	#N/A	#N/A	#N/A	#N/A
1977Q1	#N/A	#N/A	#N/A	#N/A	#N/A	#N/A	#N/A	#N/A	#N/A	#N/A	#N/A	#N/A	#N/A	#N/A	#N/A
1977Q2	#N/A	#N/A	#N/A	#N/A	#N/A	#N/A	#N/A	#N/A	#N/A	#N/A	#N/A	#N/A	#N/A	#N/A	#N/A
1977Q3	#N/A	#N/A	#N/A	#N/A	#N/A	#N/A	#N/A	#N/A	#N/A	#N/A	#N/A	#N/A	#N/A	#N/A	#N/A
1977Q4	#N/A	#N/A	#N/A	#N/A	#N/A	#N/A	#N/A	#N/A	#N/A	#N/A	#N/A	#N/A	#N/A	#N/A	#N/A
1978Q1	#N/A	#N/A	#N/A	#N/A	#N/A	#N/A	#N/A	#N/A	#N/A	#N/A	#N/A	#N/A	#N/A	#N/A	#N/A
1978Q2	#N/A	#N/A	#N/A	#N/A	#N/A	#N/A	#N/A	#N/A	#N/A	#N/A	#N/A	#N/A	#N/A	#N/A	#N/A
1978Q3	#N/A	#N/A	#N/A	#N/A	#N/A	#N/A	#N/A	#N/A	#N/A	#N/A	#N/A	#N/A	#N/A	#N/A	#N/A
1978Q4	#N/A	#N/A	#N/A	#N/A	#N/A	#N/A	#N/A	#N/A	#N/A	#N/A	#N/A	#N/A	#N/A	#N/A	#N/A
1979Q1	#N/A	#N/A	#N/A	#N/A	#N/A	#N/A	#N/A	#N/A	#N/A	#N/A	#N/A	#N/A	#N/A	#N/A	#N/A
1979Q2	#N/A	#N/A	#N/A	#N/A	#N/A	#N/A	#N/A	#N/A	#N/A	#N/A	#N/A	#N/A	#N/A	#N/A	#N/A
1979Q3	#N/A	#N/A	#N/A	#N/A	#N/A	#N/A	#N/A	#N/A	#N/A	#N/A	#N/A	#N/A	#N/A	#N/A	#N/A
1979Q4	#N/A	#N/A	#N/A	#N/A	#N/A	#N/A	#N/A	#N/A	#N/A	#N/A	#N/A	#N/A	#N/A	#N/A	#N/A
1980Q1	#N/A	#N/A	#N/A	#N/A	#N/A	#N/A	#N/A	#N/A	#N/A	#N/A	#N/A	#N/A	#N/A	#N/A	#N/A
1980Q2	#N/A	#N/A	#N/A	#N/A	#N/A	#N/A	#N/A	#N/A	#N/A	#N/A	#N/A	#N/A	#N/A	#N/A	#N/A
1980Q3	#N/A	#N/A	#N/A	#N/A	#N/A	#N/A	#N/A	#N/A	#N/A	#N/A	#N/A	#N/A	#N/A	#N/A	#N/A
1980Q4	#N/A	#N/A	#N/A	#N/A	#N/A	#N/A	#N/A	#N/A	#N/A	#N/A	#N/A	#N/A	#N/A	#N/A	#N/A
1981Q1	#N/A	#N/A	#N/A	#N/A	#N/A	#N/A	#N/A	#N/A	#N/A	#N/A	#N/A	#N/A	#N/A	#N/A	#N/A
1981Q2	#N/A	#N/A	#N/A	#N/A	#N/A	#N/A	#N/A	#N/A	#N/A	#N/A	#N/A	#N/A	#N/A	#N/A	#N/A
1981Q3	14.9	15.35	0.45	14	15.15	1.15	13	14.7	1.7	12.05	14.55	2.5	11.8	14.7	2.9
1981Q4	11.4	13	1.6	9.78	12.5	2.72	10	13	3	10	13.5	3.5	10	14	4
1982Q1	12.5	13.45	0.95	11.3	13.05	1.75	11.47	13	1.53	11	13.1	2.1	11	13.5	2.5
1982Q2	12	12.5	0.5	11.1	12.3	1.2	11.5	12.5	1	11.65	12.45	0.8	11	12.45	1.45
1982Q3	9.5	11	1.5	8.7	11	2.3	9	11.1	2.1	9.2	11	1.8	9.2	11.1	1.9
1982Q4	7.7	8	0.3	7.5	8.7	1.2	7.5	8.9	1.4	7.5	8.8	1.3	7.5	9	1.5
1983Q1	7.6	8.04	0.44	7.38	8	0.62	7.4	8.3	0.9	7.5	8.5	1	7.5	8.5	1
1983Q2	7.96	8.2	0.24	7.6	8.2	0.6	7.6	8.2	0.6	7.5	8.3	0.8	7.5	8.45	0.95
1983Q3	9	9.3	0.3	8.6	9.41	0.81	8.4	9.4	1	8.3	9.25	0.95	8.2	9.5	1.3
1983Q4	8.6	8.905	0.305	8.5	9	0.5	8.3	9	0.7	8.175	9.2	1.025	8.2	9.55	1.35
1984Q1	8.8	9.05	0.25	8.6	9.2	0.6	8.6	9.3	0.7	8.6	9.3	0.7	8.7	9.875	1.175
1984Q2	9.6	9.9	0.3	9.6	10.2	0.6	9.8	10.4	0.6	9.7	10.8	1.1	9.5	11	1.5
1984Q3	10.1	10.38	0.28	10.1	10.6	0.5	10.1	11	0.9	9.8	11.3	1.5	10.1	11.6	1.5
1984Q4	9.1	9.7	0.6	8.8	9.6	0.8	9	9.8	0.8	9	10.3	1.3	9	10.5	1.5
1985Q1	7.75	8.2	0.45	7.92	8.65	0.73	8	9.1	1.1	8.4	9.5	1.1	8.1	9.5	1.4
1985Q2	7.6	8.03	0.43	7.4	8.4	1	7.4	8.85	1.45	7.4	8.8	1.4	7.5	9.3	1.8
1985Q3	7.1	7.4	0.3	7.2	7.75	0.55	7.2	8	0.8	7.15	8.3	1.15	7.2	8.5	1.3
1985Q4	7.07	7.2	0.13	6.91	7.3	0.39	6.9	7.4	0.5	6.77	7.45	0.68	6.8	7.65	0.85
1986Q1	7	7.1	0.1	6.8	7.2	0.4	6.8	7.25	0.45	6.8	7.4	0.6	6.9	7.3	0.4
1986Q2	6.02	6.26	0.24	5.8	6.45	0.65	5.8	6.75	0.95	6	6.9	0.9	6.175	7.1	0.925
1986Q3	5.55	5.8	0.25	5.2	5.71	0.51	5.215	5.825	0.61	5.155	6.005	0.85	5.325	6.275	0.95
1986Q4	5.2	5.3	0.1	5	5.2	0.2	4.98	5.4	0.42	5.07	5.6	0.53	5.03	5.7	0.67
1987Q1	5.35	5.5	0.15	5.2	5.7	0.5	5.28	5.85	0.57	5.53	6.03	0.5	5.605	6.225	0.62
1987Q2	5.65	5.8	0.15	5.72	6.02	0.3	5.85	6.26	0.41	6	6.5	0.5	6	6.5	0.5
1987Q3	5.8	6	0.2	5.9	6.25	0.35	6	6.58	0.58	6	6.5	0.5	5.83	6.75	0.92
1987Q4	5.7	6.1	0.4	5.5	6.2	0.7	5.4	6.35	0.95	5.5	6.5	1	5.5	6.6	1.1
1988Q1	5.7	5.9	0.2	5.5	5.9	0.4	5.45	6.025	0.575	5.5	6.225	0.725	5.68	6.55	0.87
1988Q2	6	6.2	0.2	6	6.6	0.6	6	6.75	0.75	6.1	7.5	1.4	6.3	7.6	1.3
1988Q3	6.785	7.05	0.265	6.95	7.35	0.4	7.22	7.65	0.43	7.15	7.68	0.53	6.8	7.85	1.05
1988Q4	7.3	7.7	0.4	7.3	8	0.7	7.4	8	0.6	7.1	8.1	1	7	7.9	0.9
1989Q1	8.3	8.5	0.2	8.5	8.8	0.3	8.04	9	0.96	7.8	9	1.2	7.55	9	1.45
1989Q2	8.4	8.6	0.2	8.3	8.6	0.3	7.8	8.6	0.8	7.31	8.5	1.19	7.3	8.25	0.95
1989Q3	7.8	8.1	0.3	7.4	8.1	0.7	7	8.2	1.2	6.8	8.3	1.5	6.8	8.3	1.5
1989Q4	7.55	7.725	0.175	7.225	7.6	0.375	7	7.54	0.54	6.875	7.65	0.775	6.875	7.725	0.85
1990Q1	7.625	7.74	0.115	7.35	7.9	0.55	7.15	7.92	0.77	7.05	7.945	0.895	7.15	8	0.85
1990Q2	7.74	7.925	0.185	7.555	7.895	0.34	7.4	7.89	0.49	7.225	8.11	0.885	7.265	8.06	0.795
1990Q3	7.5	7.71	0.21	7.2	7.3	0.1	6.9	7.2	0.3	6.6	7.2	0.6	6.475	7.125	0.65
1990Q4	7	7.17	0.17	6.7	7	0.3	6.49	6.98	0.49	6.45	7	0.55	6.5	7	0.5
1991Q1	5.95	6.2	0.25	5.5	5.92	0.42	5.4	6.09	0.69	5.6	6.3	0.7	5.8	6.4	0.6
1991Q2	5.5	5.7	0.2	5.4	5.66	0.26	5.5	5.9	0.4	5.7	6.1	0.4	5.85	6.3	0.45
1991Q3	5.37	5.6	0.23	5.31	5.685	0.375	5.495	5.995	0.5	5.615	6.2	0.585	5.71	6.5	0.79
1991Q4	4.71	4.9	0.19	4.5	5	0.5	4.5	5.12	0.62	4.74	5.3	0.56	4.97	5.5	0.53
1992Q1	3.75	3.95	0.2	3.65	4	0.35	3.8	4.4	0.6	4	4.7	0.7	4.2	4.9	0.7
1992Q2	3.7	3.9	0.2	3.7	4.08	0.38	3.85	4.26	0.41	4.05	4.675	0.625	4.25	5.075	0.825
1992Q3	3.12	3.2	0.08	3.1	3.3	0.2	3.2	3.57	0.37	3.4	3.8	0.4	3.6	4.09	0.49
1992Q4	2.9	3.09	0.19	2.9	3.12	0.22	3.08	3.3	0.22	3.2	3.5	0.3	3.4	3.79	0.39
1993Q1	2.96	3.1	0.14	3	3.2	0.2	3.1	3.45	0.35	3.225	3.7	0.475	3.4	4	0.6
1993Q2	2.9	3	0.1	2.95	3.1	0.15	2.98	3.4	0.42	2.99	3.85	0.86	3	3.99	0.99
1993Q3	3	3.08	0.08	3	3.2	0.2	3.13	3.4	0.27	3.17	3.5	0.33	3.13	3.63	0.5
1993Q4	3.05	3.1	0.05	3.08	3.2	0.12	3.08	3.33	0.25	3.18	3.55	0.37	3.34	3.73	0.39
1994Q1	3.105	3.225	0.12	3.295	3.46	0.165	3.38	3.655	0.275	3.44	3.8	0.36	3.52	4	0.48
1994Q2	3.75	4.1	0.35	4	4.4	0.4	4.05	4.65	0.6	4.08	4.7	0.62	4.2	4.85	0.65
1994Q3	4.35	4.5	0.15	4.47	4.8	0.33	4.55	5.1	0.55	4.56	5.4	0.84	4.52	5.4	0.88
1994Q4	5.09	5.325	0.235	5.445	5.925	0.48	5.6	6.34	0.74	5.45	6.335	0.885	5.4	6.345	0.945
1995Q1	5.8	5.955	0.155	6.065	6.35	0.285	6.09	6.675	0.585	6	6.75	0.75	5.9	6.58	0.68
1995Q2	5.675	5.845	0.17	5.675	5.98	0.305	5.725	6.1	0.375	5.7	6.26	0.56	5.625	6.275	0.65
1995Q3	5.4	5.56	0.16	5.315	5.625	0.31	5.25	5.71	0.46	5.1	5.85	0.75	5.17	5.96	0.79
1995Q4	5.26	5.4	0.14	5.05	5.34	0.29	4.9	5.35	0.45	4.9	5.35	0.45	4.85	5.35	0.5
1996Q1	4.9	5.015	0.115	4.665	4.925	0.26	4.5	4.8	0.3	4.45	5	0.55	4.5	5.1	0.6
1996Q2	4.99	5.1	0.11	5	5.11	0.11	4.93	5.2	0.27	4.8	5.3	0.5	4.75	5.25	0.5
1996Q3	5.1	5.15	0.05	5.08	5.3	0.22	5.03	5.52	0.49	5	5.6	0.6	4.835	5.61	0.775
1996Q4	5	5.1	0.1	5	5.24	0.24	5	5.42	0.42	5	5.5	0.5	4.83	5.5	0.67
1997Q1	5	5.1	0.1	5	5.2	0.2	5	5.3	0.3	5	5.4	0.4	4.95	5.49	0.54
1997Q2	5.2	5.31	0.11	5.35	5.6	0.25	5.4	5.71	0.31	5.4	5.7	0.3	5.17	5.57	0.4
1997Q3	5.1	5.195	0.095	5.16	5.35	0.19	5.15	5.5	0.35	5.08	5.6	0.52	5.015	5.6	0.585
1997Q4	5.02	5.15	0.13	5.1	5.3	0.2	5.06	5.46	0.4	5.05	5.5	0.45	5	5.6	0.6
1998Q1	5.05	5.145	0.095	5	5.2	0.2	5	5.225	0.225	5	5.3	0.3	5	5.23	0.23
1998Q2	5	5.145	0.145	5.01	5.225	0.215	5.02	5.325	0.305	5.03	5.51	0.48	5.02	5.5	0.48
1998Q3	4.96	5	0.04	4.98	5.1	0.12	4.98	5.22	0.24	4.97	5.25	0.28	4.97	5.3	0.33
1998Q4	4.125	4.45	0.325	4	4.325	0.325	3.745	4.36	0.615	3.8	4.445	0.645	3.9	4.515	0.615
1999Q1	4.35	4.425	0.075	4.33	4.465	0.135	4.3	4.535	0.235	4.21	4.55	0.34	4.3	4.65	0.35
1999Q2	4.4	4.5	0.1	4.44	4.6	0.16	4.4	4.625	0.225	4.4	4.75	0.35	4.4	4.825	0.425
1999Q3	4.61	4.8	0.19	4.725	5	0.275	4.765	5.03	0.265	4.725	5.055	0.33	4.7	5.1	0.4
1999Q4	4.8	5.02	0.22	4.9	5.2	0.3	4.9	5.3	0.4	4.95	5.4	0.45	4.9	5.5	0.6
2000Q1	5.45	5.6	0.15	5.61	5.8	0.19	5.68	5.9	0.22	5.7	5.98	0.28	5.54	6	0.46
2000Q2	5.84	6.01	0.17	6	6.35	0.35	6.12	6.6	0.48	6	6.55	0.55	5.885	6.52	0.635
2000Q3	5.935	6.1	0.165	5.875	6.2	0.325	5.775	6.225	0.45	5.665	6.15	0.485	5.6	6.1	0.5
2000Q4	6.04	6.2	0.16	6	6.2	0.2	6	6.2	0.2	5.8	6.2	0.4	5.7	6.2	0.5
2001Q1	4.9	5.2	0.3	4.5	5	0.5	4.4	4.9	0.5	4.5	4.95	0.45	4.5	5.24	0.74
2001Q2	3.71	4	0.29	3.3	3.83	0.53	3.25	3.85	0.6	3.35	4.16	0.81	3.53	4.4	0.87
2001Q3	3.36	3.5	0.14	3.18	3.4	0.22	3.15	3.6	0.45	3.25	3.71	0.46	3.34	4	0.66
2001Q4	1.89	2.14	0.25	1.7	2.05	0.35	1.7	2.2	0.5	2	2.6	0.6	2.3	3.32	1.02
2002Q1	1.66	1.73	0.07	1.7	1.9	0.2	1.89	2.3	0.41	2	2.75	0.75	2.22	3.3	1.08
2002Q2	1.71	1.85	0.14	1.81	2.2	0.39	2.15	2.76	0.61	2.44	3.2	0.76	2.87	3.7	0.83
2002Q3	1.65	1.71	0.06	1.68	1.78	0.1	1.75	2.1	0.35	2	2.44	0.44	2.2	2.89	0.69
2002Q4	1.34	1.56	0.22	1.2	1.5	0.3	1.28	1.7	0.42	1.55	1.97	0.42	1.8	2.4	0.6
2003Q1	1.16	1.3	0.14	1.2	1.39	0.19	1.28	1.6	0.32	1.56	2.07	0.51	1.95	2.57	0.62
2003Q2	1.14	1.22	0.08	1.15	1.3	0.15	1.18	1.51	0.33	1.3	1.7	0.4	1.44	2.12	0.68
2003Q3	0.905	1.06	0.155	0.96	1.1	0.14	1.035	1.28	0.245	1.075	1.59	0.515	1.195	2.09	0.895
2003Q4	0.94	1	0.06	0.95	1.1	0.15	1	1.25	0.25	1.11	1.75	0.64	1.215	1.975	0.76
2004Q1	0.9	0.97	0.07	0.96	1.1	0.14	1.01	1.4	0.39	1.1	1.85	0.75	1.4	2.3	0.9
2004Q2	0.94	1.07	0.13	1.15	1.45	0.3	1.4	1.77	0.37	1.81	2.213	0.403	2.09	2.68	0.59
2004Q3	1.362	1.5425	0.1805	1.6	2.07	0.47	1.9525	2.4385	0.486	2.2935	3.15	0.8565	2.5535	3.75	1.1965
2004Q4	1.85	2	0.15	2.15	2.46	0.31	2.407	2.7	0.293	2.663	3.09	0.427	2.907	3.46	0.553
2005Q1	2.47	2.521	0.051	2.8	3	0.2	3.09	3.428	0.338	3.34	3.724	0.384	3.6	4	0.4
2005Q2	2.93	3.06	0.13	3.3	3.55	0.25	3.59	3.905	0.315	3.74	4.15	0.41	3.96	4.25	0.29
2005Q3	3.3	3.482	0.182	3.76	3.99	0.23	3.94	4.26	0.32	4	4.366	0.366	4	4.5	0.5
2005Q4	3.875	4	0.125	4.1	4.4	0.3	4.25	4.6	0.35	4.3	4.75	0.45	4.36	4.75	0.39
2006Q1	4.3	4.45	0.15	4.5	4.75	0.25	4.5	4.85	0.35	4.48	4.85	0.37	4.405	4.8375	0.4325
2006Q2	4.7	4.9	0.2	4.8822	5.1	0.2178	4.85	5.2	0.35	4.76	5.2	0.44	4.7	5.17	0.47
2006Q3	5	5.1333	0.1333	5	5.33	0.33	4.9	5.35	0.45	4.8	5.37	0.57	4.72	5.3951	0.6751
2006Q4	4.91	5.01	0.1	4.9	5.0883	0.1883	4.75	5.2	0.45	4.56	5.2	0.64	4.42	5.3	0.88
2007Q1	4.95	5.0792	0.1292	4.903	5.1	0.197	4.75	5.1	0.35	4.673	5.1	0.427	4.45	5.1	0.65
2007Q2	4.9	5.03	0.13	4.8363	5.045	0.2087	4.7	5.16	0.46	4.5125	5.2	0.6875	4.5	5.1611	0.6611
2007Q3	4.74	4.91	0.17	4.74	4.97	0.23	4.7	5.05	0.35	4.64	5.0216	0.3816	4.475	5	0.525
2007Q4	3.75	4.1	0.35	3.7	4.1	0.4	3.75	4.1608	0.4108	3.7	4.25	0.55	3.7	4.25	0.55
2008Q1	2.22	2.65	0.43	2	2.49	0.49	2	2.4	0.4	2.0181	2.65	0.6319	2.3083	3.1	0.7917
2008Q2	1.3962	1.6	0.2038	1.48	1.89	0.41	1.55	2	0.45	1.585	2.2542	0.6692	1.8231	2.62	0.7969
2008Q3	1.7	1.8989	0.1989	1.7	2.0528	0.3528	1.8	2.2542	0.4542	2	2.658	0.658	2.12	3.1	0.98
2008Q4	0.5273	0.7558	0.2285	0.51	0.9	0.39	0.57	1	0.43	0.6972	1.3	0.6028	0.6972	1.641	0.9438
2009Q1	0.13	0.3	0.17	0.17	0.3739	0.2039	0.2	0.5	0.3	0.25	0.6	0.35	0.3618	0.8031	0.4412
2009Q2	0.18	0.25	0.07	0.2	0.31	0.11	0.23	0.38	0.15	0.25	0.6	0.35	0.3	0.95	0.65
2009Q3	0.1879	0.2	0.0121	0.2	0.3	0.1	0.2005	0.415	0.2145	0.2373	0.75	0.5127	0.3	1.115	0.815
2009Q4	0.1	0.18	0.08	0.15	0.251	0.101	0.2	0.42	0.22	0.25	0.6977	0.4477	0.45	1	0.55
2010Q1	0.09	0.16	0.07	0.13	0.25	0.12	0.2	0.5338	0.3338	0.35	0.95	0.6	0.7	1.4	0.7
2010Q2	0.15	0.2	0.05	0.2	0.32	0.12	0.266	0.7	0.434	0.46	1.2	0.74	0.8	1.7	0.9
2010Q3	0.15	0.2	0.05	0.16	0.25	0.09	0.2	0.35	0.15	0.2	0.6	0.4	0.425	0.95	0.525
2010Q4	0.14	0.178	0.038	0.15	0.2123	0.0623	0.15	0.2576	0.1076	0.19	0.4071	0.2171	0.28	0.607	0.327
2011Q1	0.15	0.195	0.045	0.15	0.2	0.05	0.15	0.2789	0.1289	0.16	0.4299	0.2699	0.2475	0.645	0.3975
2011Q2	0.1	0.15	0.05	0.13	0.22	0.09	0.15	0.43	0.28	0.3	0.7389	0.4389	0.5	1.1	0.6
2011Q3	0.05	0.1	0.05	0.06	0.19	0.13	0.095	0.22	0.125	0.1	0.43	0.33	0.1666	0.65	0.4834
2011Q4	0.03	0.1	0.07	0.04	0.13	0.09	0.05	0.15	0.1	0.06	0.2	0.14	0.07	0.22	0.15
2012Q1	0.01	0.06	0.05	0.02	0.0991	0.0791	0.02	0.1	0.08	0.02	0.1	0.08	0.03	0.18	0.15
2012Q2	0.07	0.1	0.03	0.07	0.1	0.03	0.07	0.11	0.04	0.08	0.15	0.07	0.08	0.23	0.15
2012Q3	0.0825	0.1	0.0175	0.0845	0.11	0.0255	0.09	0.15	0.06	0.09	0.16	0.07	0.09	0.2	0.11
2012Q4	0.1	0.11	0.01	0.1	0.1208	0.0208	0.1	0.15	0.05	0.1	0.17	0.07	0.1	0.2	0.1
2013Q1	0.0796	0.1	0.0204	0.08	0.12	0.04	0.0821	0.15	0.0679	0.0806	0.15	0.0694	0.0911	0.161	0.0699
2013Q2	0.07	0.1	0.03	0.08	0.1	0.02	0.08	0.111	0.031	0.09	0.13	0.04	0.0945	0.15	0.0555
2013Q3	0.0422	0.0915	0.0493	0.05	0.1	0.05	0.05	0.11	0.06	0.0645	0.14	0.0755	0.0793	0.1714	0.0921
2013Q4	0.04	0.06	0.02	0.05	0.1	0.05	0.0507	0.1	0.0493	0.06	0.143	0.083	0.067	0.1966	0.1296
2014Q1	0.05	0.09	0.04	0.0596	0.1	0.0404	0.07	0.12	0.05	0.076	0.18	0.104	0.08	0.23	0.15
2014Q2	0.04	0.06	0.02	0.05	0.08	0.03	0.05	0.1	0.05	0.07	0.14	0.07	0.1	0.3	0.2
2014Q3	0.03	0.0583	0.0283	0.04	0.08	0.04	0.06	0.12	0.06	0.1	0.3	0.2	0.17	0.7	0.53
2014Q4	0.03	0.05	0.02	0.04	0.1	0.06	0.05	0.27	0.22	0.16	0.5755	0.4155	0.25	0.8	0.55
2015Q1	0.03	0.0905	0.0605	0.05	0.2255	0.1755	0.12	0.5	0.38	0.3022	0.771	0.4688	0.4163	1.1	0.6837
2015Q2	0.03	0.05	0.02	0.085	0.3	0.215	0.2242	0.6	0.3758	0.475	0.8875	0.4125	0.56	1.162	0.602
2015Q3	0.05	0.12	0.07	0.2	0.4	0.2	0.4334	0.7	0.2666	0.5951	1	0.4049	0.818	1.24	0.422
2015Q4	0.06	0.155	0.095	0.2523	0.47	0.2177	0.44	0.7023	0.2623	0.625	0.9508	0.3258	0.75	1.275	0.525
2016Q1	0.251	0.305	0.054	0.35	0.565	0.215	0.485	0.7758	0.2908	0.59	1.0356	0.4456	0.84	1.2962	0.4562
2016Q2	0.2528	0.34	0.0872	0.35	0.56	0.21	0.5	0.7562	0.2562	0.6625	0.99	0.3275	0.9	1.2369	0.3369
2016Q3	0.275	0.3143	0.0393	0.3633	0.5	0.1367	0.525	0.7	0.175	0.58	0.9	0.32	0.75	1.15	0.4
2016Q4	0.35	0.45	0.1	0.5	0.6	0.1	0.6	0.78	0.18	0.72	0.9845	0.2645	0.875	1.1467	0.2717
2017Q1	0.535	0.64	0.105	0.68	0.845	0.165	0.82	1.07	0.25	1	1.29	0.29	1.1127	1.44	0.3273
2017Q2	0.8	0.9	0.1	1	1.1133	0.1133	1.19	1.3	0.11	1.2589	1.5067	0.2478	1.5	1.7467	0.2467
2017Q3	1.0062	1.11	0.1038	1.12	1.3	0.18	1.28	1.47	0.19	1.36	1.69	0.33	1.51	1.9	0.39
2017Q4	1.12	1.2	0.08	1.25	1.3899	0.1399	1.39	1.6	0.21	1.5	1.8	0.3	1.6191	1.9806	0.3614
2018Q1	1.41	1.525	0.115	1.5783	1.73	0.1517	1.7698	1.9344	0.1647	1.8676	2.1604	0.2928	2	2.352	0.352
2018Q2	1.75	1.853	0.103	1.9	2.0879	0.1879	2.0145	2.3	0.2855	2.2	2.5288	0.3288	2.32	2.76	0.44
2018Q3	1.9854	2.1	0.1146	2.1677	2.3227	0.155	2.3517	2.5308	0.1792	2.4688	2.7698	0.3011	2.52	2.9685	0.4485
2018Q4	2.25	2.37	0.12	2.4	2.55	0.15	2.5033	2.8	0.2967	2.5686	2.98	0.4114	2.6417	3.1	0.4583
2019Q1	2.4	2.4526	0.0526	2.4	2.56	0.16	2.5	2.674	0.174	2.56	2.77	0.21	2.6	2.85	0.25
2019Q2	2.4	2.46	0.06	2.3809	2.4615	0.0806	2.385	2.5	0.115	2.3967	2.63	0.2333	2.3833	2.65	0.2667
2019Q3	2	2.18	0.18	1.85	2.1768	0.3268	1.75	2.15	0.4	1.7167	2.1518	0.4351	1.67	2.18	0.51
2019Q4	1.5898	1.74	0.1502	1.53	1.65	0.12	1.42	1.7	0.28	1.3952	1.7	0.3048	1.37	1.7	0.33
2020Q1	1.55	1.6	0.05	1.534	1.6183	0.0843	1.525	1.6633	0.1383	1.51	1.6833	0.1733	1.41	1.7033	0.2933
2020Q2	0.1	0.16	0.06	0.095	0.1801	0.0851	0.085	0.2	0.115	0.09	0.2346	0.1446	0.09	0.29	0.2
2020Q3	0.1	0.15	0.05	0.1	0.15	0.05	0.1	0.1734	0.0734	0.1	0.25	0.15	0.1	0.3	0.2
2020Q4	0.1	0.11	0.01	0.1	0.13	0.03	0.1	0.16	0.06	0.1	0.18	0.08	0.1	0.2	0.1
2021Q1	0.0729	0.1	0.0271	0.0875	0.12	0.0325	0.09	0.1263	0.0363	0.09	0.16	0.07	0.09	0.18	0.09
2021Q2	0.03	0.0864	0.0564	0.0433	0.1	0.0567	0.0471	0.12	0.0729	0.055	0.14	0.085	0.0733	0.22	0.1467
2021Q3	0.0456	0.07	0.0244	0.05	0.1	0.05	0.06	0.13	0.07	0.0682	0.18	0.1118	0.075	0.23	0.155
2021Q4	0.05	0.08	0.03	0.06	0.1	0.04	0.07	0.2	0.13	0.12	0.2745	0.1545	0.15	0.5288	0.3788

## Sheet: BOND
Measures of Cross-Sectional Dispersion for Quarterly Forecasts for MOODY'S AAA CORPORATE BOND YIELD (BOND)
Units: Percent p.a.
Dispersion Measure D1 = 75th Percentile Minus 25th Percentile of the Forecasts for Levels
P25 = 25th Percentile of the Forecasts for Levels
P75 = 75th Percentile of the Forecasts for Levels
At Each Survey Date T, the Quarterly Horizons Are T, T+1, T+2, T+3, and T+4
Survey_Date(T)	BOND_P25_D1(T)	BOND_P75_D1(T)	BOND_D1(T)	BOND_P25_D1(T+1)	BOND_P75_D1(T+1)	BOND_D1(T+1)	BOND_P25_D1(T+2)	BOND_P75_D1(T+2)	BOND_D1(T+2)	BOND_P25_D1(T+3)	BOND_P75_D1(T+3)	BOND_D1(T+3)	BOND_P25_D1(T+4)	BOND_P75_D1(T+4)	BOND_D1(T+4)
1968Q4	#N/A	#N/A	#N/A	#N/A	#N/A	#N/A	#N/A	#N/A	#N/A	#N/A	#N/A	#N/A	#N/A	#N/A	#N/A
1969Q1	#N/A	#N/A	#N/A	#N/A	#N/A	#N/A	#N/A	#N/A	#N/A	#N/A	#N/A	#N/A	#N/A	#N/A	#N/A
1969Q2	#N/A	#N/A	#N/A	#N/A	#N/A	#N/A	#N/A	#N/A	#N/A	#N/A	#N/A	#N/A	#N/A	#N/A	#N/A
1969Q3	#N/A	#N/A	#N/A	#N/A	#N/A	#N/A	#N/A	#N/A	#N/A	#N/A	#N/A	#N/A	#N/A	#N/A	#N/A
1969Q4	#N/A	#N/A	#N/A	#N/A	#N/A	#N/A	#N/A	#N/A	#N/A	#N/A	#N/A	#N/A	#N/A	#N/A	#N/A
1970Q1	#N/A	#N/A	#N/A	#N/A	#N/A	#N/A	#N/A	#N/A	#N/A	#N/A	#N/A	#N/A	#N/A	#N/A	#N/A
1970Q2	#N/A	#N/A	#N/A	#N/A	#N/A	#N/A	#N/A	#N/A	#N/A	#N/A	#N/A	#N/A	#N/A	#N/A	#N/A
1970Q3	#N/A	#N/A	#N/A	#N/A	#N/A	#N/A	#N/A	#N/A	#N/A	#N/A	#N/A	#N/A	#N/A	#N/A	#N/A
1970Q4	#N/A	#N/A	#N/A	#N/A	#N/A	#N/A	#N/A	#N/A	#N/A	#N/A	#N/A	#N/A	#N/A	#N/A	#N/A
1971Q1	#N/A	#N/A	#N/A	#N/A	#N/A	#N/A	#N/A	#N/A	#N/A	#N/A	#N/A	#N/A	#N/A	#N/A	#N/A
1971Q2	#N/A	#N/A	#N/A	#N/A	#N/A	#N/A	#N/A	#N/A	#N/A	#N/A	#N/A	#N/A	#N/A	#N/A	#N/A
1971Q3	#N/A	#N/A	#N/A	#N/A	#N/A	#N/A	#N/A	#N/A	#N/A	#N/A	#N/A	#N/A	#N/A	#N/A	#N/A
1971Q4	#N/A	#N/A	#N/A	#N/A	#N/A	#N/A	#N/A	#N/A	#N/A	#N/A	#N/A	#N/A	#N/A	#N/A	#N/A
1972Q1	#N/A	#N/A	#N/A	#N/A	#N/A	#N/A	#N/A	#N/A	#N/A	#N/A	#N/A	#N/A	#N/A	#N/A	#N/A
1972Q2	#N/A	#N/A	#N/A	#N/A	#N/A	#N/A	#N/A	#N/A	#N/A	#N/A	#N/A	#N/A	#N/A	#N/A	#N/A
1972Q3	#N/A	#N/A	#N/A	#N/A	#N/A	#N/A	#N/A	#N/A	#N/A	#N/A	#N/A	#N/A	#N/A	#N/A	#N/A
1972Q4	#N/A	#N/A	#N/A	#N/A	#N/A	#N/A	#N/A	#N/A	#N/A	#N/A	#N/A	#N/A	#N/A	#N/A	#N/A
1973Q1	#N/A	#N/A	#N/A	#N/A	#N/A	#N/A	#N/A	#N/A	#N/A	#N/A	#N/A	#N/A	#N/A	#N/A	#N/A
1973Q2	#N/A	#N/A	#N/A	#N/A	#N/A	#N/A	#N/A	#N/A	#N/A	#N/A	#N/A	#N/A	#N/A	#N/A	#N/A
1973Q3	#N/A	#N/A	#N/A	#N/A	#N/A	#N/A	#N/A	#N/A	#N/A	#N/A	#N/A	#N/A	#N/A	#N/A	#N/A
1973Q4	#N/A	#N/A	#N/A	#N/A	#N/A	#N/A	#N/A	#N/A	#N/A	#N/A	#N/A	#N/A	#N/A	#N/A	#N/A
1974Q1	#N/A	#N/A	#N/A	#N/A	#N/A	#N/A	#N/A	#N/A	#N/A	#N/A	#N/A	#N/A	#N/A	#N/A	#N/A
1974Q2	#N/A	#N/A	#N/A	#N/A	#N/A	#N/A	#N/A	#N/A	#N/A	#N/A	#N/A	#N/A	#N/A	#N/A	#N/A
1974Q3	#N/A	#N/A	#N/A	#N/A	#N/A	#N/A	#N/A	#N/A	#N/A	#N/A	#N/A	#N/A	#N/A	#N/A	#N/A
1974Q4	#N/A	#N/A	#N/A	#N/A	#N/A	#N/A	#N/A	#N/A	#N/A	#N/A	#N/A	#N/A	#N/A	#N/A	#N/A
1975Q1	#N/A	#N/A	#N/A	#N/A	#N/A	#N/A	#N/A	#N/A	#N/A	#N/A	#N/A	#N/A	#N/A	#N/A	#N/A
1975Q2	#N/A	#N/A	#N/A	#N/A	#N/A	#N/A	#N/A	#N/A	#N/A	#N/A	#N/A	#N/A	#N/A	#N/A	#N/A
1975Q3	#N/A	#N/A	#N/A	#N/A	#N/A	#N/A	#N/A	#N/A	#N/A	#N/A	#N/A	#N/A	#N/A	#N/A	#N/A
1975Q4	#N/A	#N/A	#N/A	#N/A	#N/A	#N/A	#N/A	#N/A	#N/A	#N/A	#N/A	#N/A	#N/A	#N/A	#N/A
1976Q1	#N/A	#N/A	#N/A	#N/A	#N/A	#N/A	#N/A	#N/A	#N/A	#N/A	#N/A	#N/A	#N/A	#N/A	#N/A
1976Q2	#N/A	#N/A	#N/A	#N/A	#N/A	#N/A	#N/A	#N/A	#N/A	#N/A	#N/A	#N/A	#N/A	#N/A	#N/A
1976Q3	#N/A	#N/A	#N/A	#N/A	#N/A	#N/A	#N/A	#N/A	#N/A	#N/A	#N/A	#N/A	#N/A	#N/A	#N/A
1976Q4	#N/A	#N/A	#N/A	#N/A	#N/A	#N/A	#N/A	#N/A	#N/A	#N/A	#N/A	#N/A	#N/A	#N/A	#N/A
1977Q1	#N/A	#N/A	#N/A	#N/A	#N/A	#N/A	#N/A	#N/A	#N/A	#N/A	#N/A	#N/A	#N/A	#N/A	#N/A
1977Q2	#N/A	#N/A	#N/A	#N/A	#N/A	#N/A	#N/A	#N/A	#N/A	#N/A	#N/A	#N/A	#N/A	#N/A	#N/A
1977Q3	#N/A	#N/A	#N/A	#N/A	#N/A	#N/A	#N/A	#N/A	#N/A	#N/A	#N/A	#N/A	#N/A	#N/A	#N/A
1977Q4	#N/A	#N/A	#N/A	#N/A	#N/A	#N/A	#N/A	#N/A	#N/A	#N/A	#N/A	#N/A	#N/A	#N/A	#N/A
1978Q1	#N/A	#N/A	#N/A	#N/A	#N/A	#N/A	#N/A	#N/A	#N/A	#N/A	#N/A	#N/A	#N/A	#N/A	#N/A
1978Q2	#N/A	#N/A	#N/A	#N/A	#N/A	#N/A	#N/A	#N/A	#N/A	#N/A	#N/A	#N/A	#N/A	#N/A	#N/A
1978Q3	#N/A	#N/A	#N/A	#N/A	#N/A	#N/A	#N/A	#N/A	#N/A	#N/A	#N/A	#N/A	#N/A	#N/A	#N/A
1978Q4	#N/A	#N/A	#N/A	#N/A	#N/A	#N/A	#N/A	#N/A	#N/A	#N/A	#N/A	#N/A	#N/A	#N/A	#N/A
1979Q1	#N/A	#N/A	#N/A	#N/A	#N/A	#N/A	#N/A	#N/A	#N/A	#N/A	#N/A	#N/A	#N/A	#N/A	#N/A
1979Q2	#N/A	#N/A	#N/A	#N/A	#N/A	#N/A	#N/A	#N/A	#N/A	#N/A	#N/A	#N/A	#N/A	#N/A	#N/A
1979Q3	#N/A	#N/A	#N/A	#N/A	#N/A	#N/A	#N/A	#N/A	#N/A	#N/A	#N/A	#N/A	#N/A	#N/A	#N/A
1979Q4	#N/A	#N/A	#N/A	#N/A	#N/A	#N/A	#N/A	#N/A	#N/A	#N/A	#N/A	#N/A	#N/A	#N/A	#N/A
1980Q1	#N/A	#N/A	#N/A	#N/A	#N/A	#N/A	#N/A	#N/A	#N/A	#N/A	#N/A	#N/A	#N/A	#N/A	#N/A
1980Q2	#N/A	#N/A	#N/A	#N/A	#N/A	#N/A	#N/A	#N/A	#N/A	#N/A	#N/A	#N/A	#N/A	#N/A	#N/A
1980Q3	#N/A	#N/A	#N/A	#N/A	#N/A	#N/A	#N/A	#N/A	#N/A	#N/A	#N/A	#N/A	#N/A	#N/A	#N/A
1980Q4	#N/A	#N/A	#N/A	#N/A	#N/A	#N/A	#N/A	#N/A	#N/A	#N/A	#N/A	#N/A	#N/A	#N/A	#N/A
1981Q1	#N/A	#N/A	#N/A	#N/A	#N/A	#N/A	#N/A	#N/A	#N/A	#N/A	#N/A	#N/A	#N/A	#N/A	#N/A
1981Q2	#N/A	#N/A	#N/A	#N/A	#N/A	#N/A	#N/A	#N/A	#N/A	#N/A	#N/A	#N/A	#N/A	#N/A	#N/A
1981Q3	15	16.2	1.2	14.4	15.7	1.3	14	15.2	1.2	13	15	2	13	14.8	1.8
1981Q4	15	16	1	14	15.3	1.3	13.5	15	1.5	13	15	2	13	15.3	2.3
1982Q1	15.45	16	0.55	14.5	15.8	1.3	14	16	2	14	15.8	1.8	13.85	15.85	2
1982Q2	14.7	16	1.3	13.9	15.6	1.7	13.6	15.7	2.1	13.8	15.5	1.7	13.3	15	1.7
1982Q3	14.2	15.3	1.1	13.4	15	1.6	13.3	15	1.7	13	14.7	1.7	12.8	14.5	1.7
1982Q4	11.95	13	1.05	11.5	12.9	1.4	11	12.5	1.5	11	12.5	1.5	11	12.5	1.5
1983Q1	11.3	12.105	0.805	11	11.95	0.95	10.5	12	1.5	10.5	12.15	1.65	10.45	12.25	1.8
1983Q2	11.25	11.75	0.5	10.9	11.6	0.7	10.8	11.7	0.9	10.56	11.6	1.04	10.34	11.6	1.26
1983Q3	12	12.5	0.5	11.5	12.5	1	11.5	12.5	1	11.5	12.5	1	11.2	12.3	1.1
1983Q4	12	12.7	0.7	11.7	12.5	0.8	11.4	12.4	1	11.2	12.8	1.6	11.4	13.1	1.7
1984Q1	12.25	12.9	0.65	11.9	13	1.1	12	13.1	1.1	12.06	13.3	1.24	12.25	13.4	1.15
1984Q2	13.1	14	0.9	13.15	14	0.85	13.3	14.2	0.9	13.15	14.375	1.225	13	14.5	1.5
1984Q3	13.5	14.3	0.8	13.6	14.45	0.85	13.5	14.7	1.2	13.4	15	1.6	13.6	14.8	1.2
1984Q4	12.4	13.15	0.75	12.25	13	0.75	12.2	13.2	1	12.1	13.45	1.35	12.125	14	1.875
1985Q1	11.92	12.5	0.58	12	12.7	0.7	11.6	13.1	1.5	11.5	13.3	1.8	11.6	13.5	1.9
1985Q2	11.8	12.4	0.6	11.7	12.5	0.8	11.7	12.8	1.1	11.8	12.95	1.15	11.7	12.8	1.1
1985Q3	11.04	11.69	0.65	11.03	11.88	0.85	10.945	12	1.055	10.78	12.2	1.42	10.3	12.3	2
1985Q4	10.7	11.3	0.6	10.5	11.3	0.8	10.3	11.4	1.1	10.2	11.7	1.5	10	11.5	1.5
1986Q1	9.75	10.4	0.65	9.85	10.35	0.5	9.5	10.55	1.05	9.75	10.55	0.8	9.6	10.5	0.9
1986Q2	8.6	9.03	0.43	8.6	9	0.4	8.8	9.5	0.7	8.94	9.85	0.91	8.85	10.04	1.19
1986Q3	8.5	8.76	0.26	8.25	8.72	0.47	8.3	8.9	0.6	8.5	8.82	0.32	8.65	9.1	0.45
1986Q4	8.815	9.18	0.365	8.55	9.1	0.55	8.48	9.11	0.63	8.68	9.21	0.53	8.8	9.435	0.635
1987Q1	8.4	8.97	0.57	8.3	9.2	0.9	8.4	9.15	0.75	8.5	9.4	0.9	8.6	9.5	0.9
1987Q2	8.7	9.2	0.5	8.8	9.3	0.5	8.9	9.5	0.6	9	9.8	0.8	9.2	9.8	0.6
1987Q3	9.53	9.8	0.27	9.7	10	0.3	9.9	10.2	0.3	9.95	10.4	0.45	9.85	10.5	0.65
1987Q4	9.95	10.4	0.45	9.5	10.5	1	9.25	10.5	1.25	9.3	10.8	1.5	9.4	11	1.6
1988Q1	9.6	10	0.4	9.45	9.93	0.48	9.4	10.06	0.66	9.6	10.25	0.65	9.8	10.7	0.9
1988Q2	9.7	9.9	0.2	9.7	10.3	0.6	9.78	10.7	0.92	10	11.3	1.3	10.1	11.5	1.4
1988Q3	10.08	10.4	0.32	10.2	10.6	0.4	10.5	10.8	0.3	10.6	10.9	0.3	10.4	10.8	0.4
1988Q4	9.7	10.3	0.6	9.8	10.7	0.9	9.9	10.9	1	9.78	11	1.22	9.89	11.3	1.41
1989Q1	9.7	10.25	0.55	9.9	10.4	0.5	9.9	10.6	0.7	9.71	10.7	0.99	9.7	11	1.3
1989Q2	9.8	10.06	0.26	9.7	10.115	0.415	9.55	10.3	0.75	9.485	10.3	0.815	9.2	10.35	1.15
1989Q3	8.9	9.5	0.6	8.75	9.6	0.85	8.6	9.7	1.1	8.6	9.7	1.1	8.6	9.7	1.1
1989Q4	8.8	9.1	0.3	8.64	8.91	0.27	8.7	8.91	0.21	8.62	9	0.38	8.73	9.25	0.52
1990Q1	9.15	9.5	0.35	9.2	9.5	0.3	9.3	9.8	0.5	9.29	9.63	0.34	9.3	9.7	0.4
1990Q2	9.48	9.83	0.35	9.28	9.91	0.63	9.22	9.91	0.69	9.15	9.94	0.79	9.25	10	0.75
1990Q3	9.3	9.91	0.61	9.25	9.9	0.65	9.2	9.68	0.48	9	9.4	0.4	8.75	9.49	0.74
1990Q4	9.34	9.5	0.16	9.05	9.45	0.4	8.8	9.3	0.5	8.6	9.31	0.71	8.54	9.3	0.76
1991Q1	8.7	8.96	0.26	8.4	8.76	0.36	8.25	8.89	0.64	8.29	9.04	0.75	8.3	9	0.7
1991Q2	8.74	8.95	0.21	8.6	8.905	0.305	8.5	9	0.5	8.5	9.1	0.6	8.6	9.15	0.55
1991Q3	8.75	8.95	0.2	8.7	9	0.3	8.71	9.1	0.39	8.64	9.3	0.66	8.71	9.28	0.57
1991Q4	8.42	8.6	0.18	8.24	8.6	0.36	8.13	8.75	0.62	8.2	8.8	0.6	8.15	8.9	0.75
1992Q1	8.16	8.365	0.205	8.08	8.38	0.3	8.04	8.53	0.49	8.275	8.56	0.285	8.1	8.7	0.6
1992Q2	8.245	8.38	0.135	8.175	8.51	0.335	8.1	8.7	0.6	8.2	8.75	0.55	8.27	8.8	0.53
1992Q3	7.9	8.06	0.16	7.76	8.125	0.365	7.75	8.265	0.515	7.82	8.305	0.485	7.85	8.395	0.545
1992Q4	8	8.11	0.11	7.97	8.2	0.23	7.89	8.28	0.39	7.83	8.3	0.47	7.8	8.44	0.64
1993Q1	7.77	7.9	0.13	7.74	8	0.26	7.74	8.04	0.3	7.6	8.17	0.57	7.65	8.3	0.65
1993Q2	7.405	7.655	0.25	7.4	7.725	0.325	7.29	7.8	0.51	7.4	7.88	0.48	7.3	7.85	0.55
1993Q3	7.075	7.305	0.23	7	7.39	0.39	6.98	7.5	0.52	7	7.59	0.59	7	7.67	0.67
1993Q4	6.7	6.93	0.23	6.7	6.95	0.25	6.6	7	0.4	6.6	7.05	0.45	6.6	7.21	0.61
1994Q1	6.85	7	0.15	6.895	7.08	0.185	6.89	7.17	0.28	6.9	7.25	0.35	6.96	7.3	0.34
1994Q2	7.775	8.035	0.26	7.65	8.2	0.55	7.7	8.175	0.475	7.57	8.15	0.58	7.43	8.16	0.73
1994Q3	8	8.2	0.2	7.95	8.14	0.19	7.79	8.25	0.46	7.68	8.48	0.8	7.6	8.5	0.9
1994Q4	8.6	8.715	0.115	8.6	8.995	0.395	8.57	9.175	0.605	8.365	9.055	0.69	8.075	9.01	0.935
1995Q1	8.39	8.6	0.21	8.33	8.7	0.37	8.19	8.7	0.51	8.07	8.69	0.62	7.95	8.74	0.79
1995Q2	7.81	8.035	0.225	7.77	8.175	0.405	7.78	8.325	0.545	7.705	8.42	0.715	7.7	8.375	0.675
1995Q3	7.4	7.6	0.2	7.4	7.8	0.4	7.3	7.8	0.5	7.3	7.8	0.5	7.275	8	0.725
1995Q4	7	7.3	0.3	6.9	7.37	0.47	6.88	7.3	0.42	6.83	7.3	0.47	6.87	7.39	0.52
1996Q1	6.76	7	0.24	6.6	7.1	0.5	6.58	7.225	0.645	6.59	7.275	0.685	6.555	7.45	0.895
1996Q2	7.495	7.675	0.18	7.35	7.75	0.4	7.25	7.79	0.54	7.255	7.8	0.545	7.05	7.6	0.55
1996Q3	7.5	7.7	0.2	7.45	7.8	0.35	7.4	7.93	0.53	7.35	8	0.65	7.2	7.74	0.54
1996Q4	7.3	7.45	0.15	7.24	7.59	0.35	7.21	7.75	0.54	7	7.65	0.65	7.1	7.58	0.48
1997Q1	7.28	7.44	0.16	7.1	7.5	0.4	7.1	7.7	0.6	7	7.6	0.6	6.95	7.75	0.8
1997Q2	7.54	7.73	0.19	7.45	7.9	0.45	7.34	7.94	0.6	7.23	7.8	0.57	7.2	7.75	0.55
1997Q3	7.18	7.45	0.27	7.2	7.7	0.5	7.17	7.75	0.58	7.1	7.8	0.7	7.12	7.75	0.63
1997Q4	6.92	7.1	0.18	7	7.2	0.2	6.95	7.25	0.3	6.97	7.38	0.41	6.9	7.39	0.49
1998Q1	6.51	6.8	0.29	6.54	6.98	0.44	6.5	7.01	0.51	6.5	7.01	0.51	6.55	7.01	0.46
1998Q2	6.6	6.78	0.18	6.55	7	0.45	6.6	7.04	0.44	6.525	7.185	0.66	6.475	7.1	0.625
1998Q3	6.53	6.67	0.14	6.5	6.75	0.25	6.57	6.85	0.28	6.6	7	0.4	6.5	7.02	0.52
1998Q4	6.03	6.45	0.42	5.85	6.43	0.58	5.8	6.5	0.7	6	6.5	0.5	6	6.5	0.5
1999Q1	6.25	6.43	0.18	6.1	6.45	0.35	6.1	6.49	0.39	6.07	6.6	0.53	6	6.73	0.73
1999Q2	6.5	6.8	0.3	6.5	6.85	0.35	6.48	6.9	0.42	6.5	6.9	0.4	6.5	6.85	0.35
1999Q3	7.1	7.35	0.25	7	7.4	0.4	6.95	7.55	0.6	6.95	7.5	0.55	6.81	7.3	0.49
1999Q4	7.31	7.485	0.175	7.22	7.6	0.38	7.12	7.715	0.595	7.11	7.765	0.655	7.095	7.7	0.605
2000Q1	7.67	7.9	0.23	7.63	8	0.37	7.52	8.05	0.53	7.45	8	0.55	7.4	7.94	0.54
2000Q2	7.72	7.9	0.18	7.755	8.15	0.395	7.705	8.28	0.575	7.73	8.25	0.52	7.7	8.24	0.54
2000Q3	7.5	7.66	0.16	7.47	7.75	0.28	7.3	7.8	0.5	7.3	7.78	0.48	7.4	7.7	0.3
2000Q4	7.5	7.6	0.1	7.47	7.7	0.23	7.44	7.75	0.31	7.4	7.78	0.38	7.3	7.84	0.54
2001Q1	7	7.1	0.1	6.6	7.1	0.5	6.51	7.2	0.69	6.52	7.2	0.68	6.68	7.28	0.6
2001Q2	6.95	7.25	0.3	6.8	7.3	0.5	6.8	7.27	0.47	6.73	7.36	0.63	6.9	7.41	0.51
2001Q3	7	7.19	0.19	6.9	7.3	0.4	6.88	7.3	0.42	6.9	7.41	0.51	6.85	7.46	0.61
2001Q4	6.6	7	0.4	6.4	7	0.6	6.4	6.95	0.55	6.55	7.035	0.485	6.62	7.055	0.435
2002Q1	6.55	7	0.45	6.6	7	0.4	6.6	7.1	0.5	6.65	7.2	0.55	6.6	7.2	0.6
2002Q2	6.62	6.8	0.18	6.6	6.9	0.3	6.7	7	0.3	6.7	7.1	0.4	6.69	7.2	0.51
2002Q3	6.3	6.55	0.25	6.225	6.585	0.36	6.235	6.805	0.57	6.28	6.895	0.615	6.6	7.1	0.5
2002Q4	6.13	6.34	0.21	6.1	6.45	0.35	6.2	6.55	0.35	6.2	6.7	0.5	6.34	6.8	0.46
2003Q1	6.06	6.29	0.23	6.1	6.35	0.25	6.07	6.45	0.38	6.2	6.65	0.45	6.25	6.85	0.6
2003Q2	5.73	6.03	0.3	5.84	6.25	0.41	5.96	6.32	0.36	6.08	6.4	0.32	6.1	6.66	0.56
2003Q3	5.5	5.9	0.4	5.6	6.11	0.51	5.7	6.25	0.55	5.8	6.35	0.55	5.9	6.59	0.69
2003Q4	5.75	5.9	0.15	5.8	6.2	0.4	5.81	6.35	0.54	5.9	6.5	0.6	6	6.7	0.7
2004Q1	5.56	5.63	0.07	5.65	5.95	0.3	5.8	6.15	0.35	5.81	6.45	0.64	5.92	6.65	0.73
2004Q2	5.76	6.075	0.315	5.9115	6.245	0.3335	5.994	6.525	0.531	6.1245	6.67	0.5455	6.3	6.8	0.5
2004Q3	5.83	6.06	0.23	6	6.32	0.32	6.17	6.54	0.37	6.2	6.8	0.6	6.3	6.988	0.688
2004Q4	5.51	5.746	0.236	5.633	6.117	0.484	5.81	6.45	0.64	5.939	6.75	0.811	6	6.83	0.83
2005Q1	5.367	5.62	0.253	5.517	5.8	0.283	5.713	6.05	0.337	5.814	6.25	0.436	5.987	6.452	0.465
2005Q2	5.38	5.6	0.22	5.45	5.84	0.39	5.6	6.2	0.6	5.81	6.4	0.59	5.92	6.63	0.71
2005Q3	5.207	5.48	0.273	5.475	5.88	0.405	5.6215	6.09	0.4685	5.7	6.2	0.5	5.7	6.4	0.7
2005Q4	5.43	5.57	0.14	5.65	6	0.35	5.9	6.284	0.384	5.927	6.4	0.473	5.8	6.523	0.723
2006Q1	5.447	5.7	0.253	5.6	6.05	0.45	5.64	6.2	0.56	5.7	6.3	0.6	5.75	6.4	0.65
2006Q2	5.8513	6.02	0.1687	6	6.2	0.2	6	6.41	0.41	6	6.4356	0.4356	6	6.4808	0.4808
2006Q3	5.8546	6.1	0.2454	5.95	6.39	0.44	5.9	6.55	0.65	5.95	6.61	0.66	6	6.6467	0.6467
2006Q4	5.5283	5.65	0.1217	5.6	5.77	0.17	5.55	5.9464	0.3964	5.6	6.06	0.46	5.6	6.1	0.5
2007Q1	5.45	5.6	0.15	5.5	5.72	0.22	5.57	5.85	0.28	5.63	5.9323	0.3023	5.5335	5.9746	0.4411
2007Q2	5.4	5.5	0.1	5.4315	5.6526	0.2212	5.4694	5.8029	0.3335	5.44	5.88	0.44	5.4892	5.925	0.4358
2007Q3	5.6209	5.7647	0.1438	5.65	5.88	0.23	5.75	5.97	0.22	5.76	6.12	0.36	5.76	6.1715	0.4115
2007Q4	5.58	5.7	0.12	5.4667	5.8	0.3333	5.46	5.95	0.49	5.5575	6.1	0.5425	5.6	6.1	0.5
2008Q1	4.91	5.39	0.48	4.8116	5.3934	0.5817	4.95	5.45	0.5	4.9995	5.59	0.5905	5.2	5.6427	0.4427
2008Q2	5.3	5.54	0.24	5.285	5.63	0.345	5.2377	5.68	0.4423	5.2052	5.8	0.5948	5.1935	5.95	0.7565
2008Q3	5.575	5.8	0.225	5.5355	5.8515	0.316	5.55	5.9854	0.4354	5.58	6.15	0.57	5.6	6.3	0.7
2008Q4	5.7	6.3	0.6	5.52	6.2433	0.7233	5.5	6.16	0.66	5.5954	6.21	0.6146	5.4954	6.24	0.7446
2009Q1	5	5.35	0.35	5	5.43	0.43	5.06	5.42	0.36	5.09	5.5	0.41	5.11	5.75	0.64
2009Q2	5.25	5.4644	0.2144	5.21	5.4942	0.2842	5.11	5.5248	0.4148	5.08	5.715	0.635	5.028	5.9	0.872
2009Q3	5.4017	5.6461	0.2444	5.3829	5.6784	0.2955	5.35	5.8176	0.4676	5.4	5.9122	0.5122	5.4981	5.95	0.4519
2009Q4	5.14	5.3	0.16	5.13	5.36	0.23	5.11	5.4042	0.2942	5.3	5.55	0.25	5.3	5.55	0.25
2010Q1	5.2	5.35	0.15	5.25	5.45	0.2	5.35	5.6	0.25	5.3821	5.8	0.4179	5.4	6.075	0.675
2010Q2	5.16	5.35	0.19	5.25	5.5	0.25	5.35	5.6	0.25	5.4	5.8479	0.4479	5.51	5.95	0.44
2010Q3	4.6339	4.8765	0.2426	4.6533	5.0617	0.4084	4.7333	5.3001	0.5667	4.825	5.4689	0.6439	5.0647	5.6251	0.5604
2010Q4	4.361	4.67	0.309	4.35	4.6114	0.2614	4.44	4.7759	0.336	4.5	5.1	0.6	4.7859	5.49	0.7041
2011Q1	4.9708	5.19	0.2192	5.03	5.3	0.27	5.0733	5.45	0.3767	5.1288	5.5018	0.3729	5.1187	5.7	0.5813
2011Q2	5.1	5.2	0.1	5.17	5.4	0.23	5.28	5.5451	0.2651	5.33	5.7951	0.4651	5.39	5.9	0.51
2011Q3	4.65	5.04	0.39	4.63	5.1475	0.5175	4.7	5.2619	0.5619	4.7313	5.4659	0.7345	4.87	5.66	0.79
2011Q4	3.9467	4.23	0.2833	4.02	4.4	0.38	4.06	4.4295	0.3695	4.1362	4.65	0.5138	4.2246	4.85	0.6254
2012Q1	3.8173	4.005	0.1877	3.8	4.2	0.4	3.89	4.3121	0.4221	3.9	4.45	0.55	3.98	4.6	0.62
2012Q2	3.86	4.0254	0.1654	3.9695	4.16	0.1905	4	4.3	0.3	4.03	4.33	0.3	4.058	4.5186	0.4606
2012Q3	3.4	3.695	0.295	3.432	3.8	0.368	3.5	3.95	0.45	3.6	4.09	0.49	3.65	4.31	0.66
2012Q4	3.4929	3.568	0.0751	3.5428	3.7358	0.193	3.6	3.8603	0.2603	3.66	4.07	0.41	3.74	4.2	0.46
2013Q1	3.6	3.86	0.26	3.64	3.95	0.31	3.73	4.03	0.3	3.83	4.2	0.37	3.93	4.3	0.37
2013Q2	3.7	3.8786	0.1786	3.7342	4	0.2658	3.8042	4.135	0.3308	3.95	4.3	0.35	4.1	4.5	0.4
2013Q3	4.06	4.4737	0.4137	4.1676	4.51	0.3424	4.2655	4.64	0.3745	4.3265	4.7	0.3735	4.44	4.9	0.46
2013Q4	4.497	4.6306	0.1336	4.5438	4.75	0.2062	4.6	4.8435	0.2435	4.7	5.0355	0.3355	4.75	5.2	0.45
2014Q1	4.5	4.7	0.2	4.588	4.8	0.212	4.7	4.9	0.2	4.788	5	0.212	4.807	5.1261	0.3191
2014Q2	4.2873	4.47	0.1827	4.3882	4.6	0.2118	4.45	4.8	0.35	4.5302	4.9084	0.3782	4.6855	5.136	0.4505
2014Q3	4.1983	4.3561	0.1578	4.28	4.65	0.37	4.4056	4.85	0.4444	4.63	5	0.37	4.75	5.4	0.65
2014Q4	3.9642	4.15	0.1859	4.07	4.4	0.33	4.12	4.6301	0.5101	4.25	4.8	0.55	4.4	5	0.6
2015Q1	3.5498	3.8717	0.3219	3.7	4.08	0.38	3.77	4.4084	0.6384	3.93	4.6	0.67	4.02	4.741	0.721
2015Q2	3.52	3.77	0.25	3.5808	4.003	0.4222	3.82	4.1	0.28	3.9646	4.35	0.3854	4.1	4.65	0.55
2015Q3	3.96	4.25	0.29	4	4.4	0.4	4.13	4.5292	0.3992	4.2	4.7804	0.5804	4.25	5.0171	0.7671
2015Q4	3.9995	4.17	0.1705	4.12	4.36	0.24	4.24	4.625	0.385	4.3	4.862	0.562	4.344	4.8811	0.5371
2016Q1	4	4.1	0.1	4.075	4.255	0.18	4.115	4.4	0.285	4.1438	4.625	0.4812	4.185	4.85	0.665
2016Q2	3.65	3.9575	0.3075	3.7601	4.1133	0.3532	3.9	4.35	0.45	4	4.4	0.4	4.09	4.6	0.51
2016Q3	3.32	3.5313	0.2113	3.47	3.8	0.33	3.5604	4	0.4396	3.6	4.24	0.64	3.7	4.3302	0.6302
2016Q4	3.46	3.6	0.14	3.62	3.7766	0.1566	3.7	3.99	0.29	3.7	4.18	0.48	3.8	4.3	0.5
2017Q1	3.8461	4.0659	0.2198	4	4.3	0.3	4.08	4.45	0.37	4.1637	4.67	0.5063	4.1771	4.82	0.6429
2017Q2	3.9	4.1	0.2	4.05	4.29	0.24	4.1243	4.49	0.3657	4.2426	4.93	0.6874	4.338	4.96	0.622
2017Q3	3.75	3.9	0.15	3.8401	4.15	0.3099	3.9878	4.35	0.3622	4.1	4.7283	0.6283	4.11	4.8445	0.7345
2017Q4	3.6423	3.87	0.2277	3.7954	4.1	0.3046	3.8964	4.3852	0.4888	3.989	4.6	0.611	4	4.75	0.75
2018Q1	3.72	3.97	0.25	3.87	4.15	0.28	4	4.31	0.31	4.1231	4.5	0.3769	4.25	4.6	0.35
2018Q2	3.94	4.05	0.11	4.1	4.35	0.25	4.2	4.64	0.44	4.2946	4.8206	0.526	4.4	5.07	0.67
2018Q3	3.975	4.175	0.2	4.1	4.4618	0.3618	4.27	4.6419	0.3719	4.335	4.9268	0.5918	4.5	5.1187	0.6187
2018Q4	4.0833	4.27	0.1867	4.2	4.4904	0.2904	4.3	4.75	0.45	4.3667	4.94	0.5733	4.4184	4.97	0.5516
2019Q1	3.85	4.0566	0.2065	3.9315	4.2144	0.2829	3.985	4.39	0.405	4.1005	4.545	0.4445	4.1671	4.66	0.493
2019Q2	3.691	3.82	0.129	3.75	3.95	0.2	3.75	4.1	0.35	3.8138	4.22	0.4062	3.85	4.33	0.48
2019Q3	3.162	3.4608	0.2987	3.2393	3.44	0.2007	3.1703	3.6	0.4297	3.2824	3.7398	0.4574	3.3165	3.9215	0.605
2019Q4	2.9772	3.12	0.1428	2.9847	3.2272	0.2425	3	3.3	0.3	3	3.35	0.35	3.1	3.4367	0.3367
2020Q1	2.8931	3.05	0.1569	2.9492	3.15	0.2008	3	3.3	0.3	3.05	3.35	0.3	3.1267	3.5	0.3733
2020Q2	2.4	2.8117	0.4117	2.3706	2.9387	0.5681	2.325	3.1666	0.8416	2.375	3.21	0.835	2.45	3.305	0.855
2020Q3	2.15	2.45	0.3	2.15	2.6	0.45	2.2	2.8	0.6	2.2	2.85	0.65	2.25	3.05	0.8
2020Q4	2.2024	2.4	0.1976	2.1	2.52	0.42	2.2	2.57	0.37	2.3	2.65	0.35	2.35	2.795	0.445
2021Q1	2.4149	2.6061	0.1912	2.4061	2.7465	0.3404	2.5	2.8235	0.3235	2.5	2.9	0.4	2.4989	2.9693	0.4704
2021Q2	2.894	3.145	0.251	2.96	3.3	0.34	3.0154	3.4	0.3846	3.03	3.5	0.47	3.06	3.65	0.59
2021Q3	2.5585	2.91	0.3515	2.7	2.99	0.29	2.845	3.4	0.555	2.9267	3.1675	0.2408	2.95	3.3	0.35
2021Q4	2.7	2.9	0.2	2.85	3.0025	0.1525	2.9868	3.05	0.0632	2.9853	3.3604	0.3751	3.0961	3.52	0.4239

## Sheet: BAABOND
Measures of Cross-Sectional Dispersion for Quarterly Forecasts for MOODY'S BAA CORPORATE BOND YIELD (BAABOND)
Units: Percent p.a.
Dispersion Measure D1 = 75th Percentile Minus 25th Percentile of the Forecasts for Levels
P25 = 25th Percentile of the Forecasts for Levels
P75 = 75th Percentile of the Forecasts for Levels
At Each Survey Date T, the Quarterly Horizons Are T, T+1, T+2, T+3, and T+4
Survey_Date(T)	BAABOND_P25_D1(T)	BAABOND_P75_D1(T)	BAABOND_D1(T)	BAABOND_P25_D1(T+1)	BAABOND_P75_D1(T+1)	BAABOND_D1(T+1)	BAABOND_P25_D1(T+2)	BAABOND_P75_D1(T+2)	BAABOND_D1(T+2)	BAABOND_P25_D1(T+3)	BAABOND_P75_D1(T+3)	BAABOND_D1(T+3)	BAABOND_P25_D1(T+4)	BAABOND_P75_D1(T+4)	BAABOND_D1(T+4)
1968Q4	#N/A	#N/A	#N/A	#N/A	#N/A	#N/A	#N/A	#N/A	#N/A	#N/A	#N/A	#N/A	#N/A	#N/A	#N/A
1969Q1	#N/A	#N/A	#N/A	#N/A	#N/A	#N/A	#N/A	#N/A	#N/A	#N/A	#N/A	#N/A	#N/A	#N/A	#N/A
1969Q2	#N/A	#N/A	#N/A	#N/A	#N/A	#N/A	#N/A	#N/A	#N/A	#N/A	#N/A	#N/A	#N/A	#N/A	#N/A
1969Q3	#N/A	#N/A	#N/A	#N/A	#N/A	#N/A	#N/A	#N/A	#N/A	#N/A	#N/A	#N/A	#N/A	#N/A	#N/A
1969Q4	#N/A	#N/A	#N/A	#N/A	#N/A	#N/A	#N/A	#N/A	#N/A	#N/A	#N/A	#N/A	#N/A	#N/A	#N/A
1970Q1	#N/A	#N/A	#N/A	#N/A	#N/A	#N/A	#N/A	#N/A	#N/A	#N/A	#N/A	#N/A	#N/A	#N/A	#N/A
1970Q2	#N/A	#N/A	#N/A	#N/A	#N/A	#N/A	#N/A	#N/A	#N/A	#N/A	#N/A	#N/A	#N/A	#N/A	#N/A
1970Q3	#N/A	#N/A	#N/A	#N/A	#N/A	#N/A	#N/A	#N/A	#N/A	#N/A	#N/A	#N/A	#N/A	#N/A	#N/A
1970Q4	#N/A	#N/A	#N/A	#N/A	#N/A	#N/A	#N/A	#N/A	#N/A	#N/A	#N/A	#N/A	#N/A	#N/A	#N/A
1971Q1	#N/A	#N/A	#N/A	#N/A	#N/A	#N/A	#N/A	#N/A	#N/A	#N/A	#N/A	#N/A	#N/A	#N/A	#N/A
1971Q2	#N/A	#N/A	#N/A	#N/A	#N/A	#N/A	#N/A	#N/A	#N/A	#N/A	#N/A	#N/A	#N/A	#N/A	#N/A
1971Q3	#N/A	#N/A	#N/A	#N/A	#N/A	#N/A	#N/A	#N/A	#N/A	#N/A	#N/A	#N/A	#N/A	#N/A	#N/A
1971Q4	#N/A	#N/A	#N/A	#N/A	#N/A	#N/A	#N/A	#N/A	#N/A	#N/A	#N/A	#N/A	#N/A	#N/A	#N/A
1972Q1	#N/A	#N/A	#N/A	#N/A	#N/A	#N/A	#N/A	#N/A	#N/A	#N/A	#N/A	#N/A	#N/A	#N/A	#N/A
1972Q2	#N/A	#N/A	#N/A	#N/A	#N/A	#N/A	#N/A	#N/A	#N/A	#N/A	#N/A	#N/A	#N/A	#N/A	#N/A
1972Q3	#N/A	#N/A	#N/A	#N/A	#N/A	#N/A	#N/A	#N/A	#N/A	#N/A	#N/A	#N/A	#N/A	#N/A	#N/A
1972Q4	#N/A	#N/A	#N/A	#N/A	#N/A	#N/A	#N/A	#N/A	#N/A	#N/A	#N/A	#N/A	#N/A	#N/A	#N/A
1973Q1	#N/A	#N/A	#N/A	#N/A	#N/A	#N/A	#N/A	#N/A	#N/A	#N/A	#N/A	#N/A	#N/A	#N/A	#N/A
1973Q2	#N/A	#N/A	#N/A	#N/A	#N/A	#N/A	#N/A	#N/A	#N/A	#N/A	#N/A	#N/A	#N/A	#N/A	#N/A
1973Q3	#N/A	#N/A	#N/A	#N/A	#N/A	#N/A	#N/A	#N/A	#N/A	#N/A	#N/A	#N/A	#N/A	#N/A	#N/A
1973Q4	#N/A	#N/A	#N/A	#N/A	#N/A	#N/A	#N/A	#N/A	#N/A	#N/A	#N/A	#N/A	#N/A	#N/A	#N/A
1974Q1	#N/A	#N/A	#N/A	#N/A	#N/A	#N/A	#N/A	#N/A	#N/A	#N/A	#N/A	#N/A	#N/A	#N/A	#N/A
1974Q2	#N/A	#N/A	#N/A	#N/A	#N/A	#N/A	#N/A	#N/A	#N/A	#N/A	#N/A	#N/A	#N/A	#N/A	#N/A
1974Q3	#N/A	#N/A	#N/A	#N/A	#N/A	#N/A	#N/A	#N/A	#N/A	#N/A	#N/A	#N/A	#N/A	#N/A	#N/A
1974Q4	#N/A	#N/A	#N/A	#N/A	#N/A	#N/A	#N/A	#N/A	#N/A	#N/A	#N/A	#N/A	#N/A	#N/A	#N/A
1975Q1	#N/A	#N/A	#N/A	#N/A	#N/A	#N/A	#N/A	#N/A	#N/A	#N/A	#N/A	#N/A	#N/A	#N/A	#N/A
1975Q2	#N/A	#N/A	#N/A	#N/A	#N/A	#N/A	#N/A	#N/A	#N/A	#N/A	#N/A	#N/A	#N/A	#N/A	#N/A
1975Q3	#N/A	#N/A	#N/A	#N/A	#N/A	#N/A	#N/A	#N/A	#N/A	#N/A	#N/A	#N/A	#N/A	#N/A	#N/A
1975Q4	#N/A	#N/A	#N/A	#N/A	#N/A	#N/A	#N/A	#N/A	#N/A	#N/A	#N/A	#N/A	#N/A	#N/A	#N/A
1976Q1	#N/A	#N/A	#N/A	#N/A	#N/A	#N/A	#N/A	#N/A	#N/A	#N/A	#N/A	#N/A	#N/A	#N/A	#N/A
1976Q2	#N/A	#N/A	#N/A	#N/A	#N/A	#N/A	#N/A	#N/A	#N/A	#N/A	#N/A	#N/A	#N/A	#N/A	#N/A
1976Q3	#N/A	#N/A	#N/A	#N/A	#N/A	#N/A	#N/A	#N/A	#N/A	#N/A	#N/A	#N/A	#N/A	#N/A	#N/A
1976Q4	#N/A	#N/A	#N/A	#N/A	#N/A	#N/A	#N/A	#N/A	#N/A	#N/A	#N/A	#N/A	#N/A	#N/A	#N/A
1977Q1	#N/A	#N/A	#N/A	#N/A	#N/A	#N/A	#N/A	#N/A	#N/A	#N/A	#N/A	#N/A	#N/A	#N/A	#N/A
1977Q2	#N/A	#N/A	#N/A	#N/A	#N/A	#N/A	#N/A	#N/A	#N/A	#N/A	#N/A	#N/A	#N/A	#N/A	#N/A
1977Q3	#N/A	#N/A	#N/A	#N/A	#N/A	#N/A	#N/A	#N/A	#N/A	#N/A	#N/A	#N/A	#N/A	#N/A	#N/A
1977Q4	#N/A	#N/A	#N/A	#N/A	#N/A	#N/A	#N/A	#N/A	#N/A	#N/A	#N/A	#N/A	#N/A	#N/A	#N/A
1978Q1	#N/A	#N/A	#N/A	#N/A	#N/A	#N/A	#N/A	#N/A	#N/A	#N/A	#N/A	#N/A	#N/A	#N/A	#N/A
1978Q2	#N/A	#N/A	#N/A	#N/A	#N/A	#N/A	#N/A	#N/A	#N/A	#N/A	#N/A	#N/A	#N/A	#N/A	#N/A
1978Q3	#N/A	#N/A	#N/A	#N/A	#N/A	#N/A	#N/A	#N/A	#N/A	#N/A	#N/A	#N/A	#N/A	#N/A	#N/A
1978Q4	#N/A	#N/A	#N/A	#N/A	#N/A	#N/A	#N/A	#N/A	#N/A	#N/A	#N/A	#N/A	#N/A	#N/A	#N/A
1979Q1	#N/A	#N/A	#N/A	#N/A	#N/A	#N/A	#N/A	#N/A	#N/A	#N/A	#N/A	#N/A	#N/A	#N/A	#N/A
1979Q2	#N/A	#N/A	#N/A	#N/A	#N/A	#N/A	#N/A	#N/A	#N/A	#N/A	#N/A	#N/A	#N/A	#N/A	#N/A
1979Q3	#N/A	#N/A	#N/A	#N/A	#N/A	#N/A	#N/A	#N/A	#N/A	#N/A	#N/A	#N/A	#N/A	#N/A	#N/A
1979Q4	#N/A	#N/A	#N/A	#N/A	#N/A	#N/A	#N/A	#N/A	#N/A	#N/A	#N/A	#N/A	#N/A	#N/A	#N/A
1980Q1	#N/A	#N/A	#N/A	#N/A	#N/A	#N/A	#N/A	#N/A	#N/A	#N/A	#N/A	#N/A	#N/A	#N/A	#N/A
1980Q2	#N/A	#N/A	#N/A	#N/A	#N/A	#N/A	#N/A	#N/A	#N/A	#N/A	#N/A	#N/A	#N/A	#N/A	#N/A
1980Q3	#N/A	#N/A	#N/A	#N/A	#N/A	#N/A	#N/A	#N/A	#N/A	#N/A	#N/A	#N/A	#N/A	#N/A	#N/A
1980Q4	#N/A	#N/A	#N/A	#N/A	#N/A	#N/A	#N/A	#N/A	#N/A	#N/A	#N/A	#N/A	#N/A	#N/A	#N/A
1981Q1	#N/A	#N/A	#N/A	#N/A	#N/A	#N/A	#N/A	#N/A	#N/A	#N/A	#N/A	#N/A	#N/A	#N/A	#N/A
1981Q2	#N/A	#N/A	#N/A	#N/A	#N/A	#N/A	#N/A	#N/A	#N/A	#N/A	#N/A	#N/A	#N/A	#N/A	#N/A
1981Q3	#N/A	#N/A	#N/A	#N/A	#N/A	#N/A	#N/A	#N/A	#N/A	#N/A	#N/A	#N/A	#N/A	#N/A	#N/A
1981Q4	#N/A	#N/A	#N/A	#N/A	#N/A	#N/A	#N/A	#N/A	#N/A	#N/A	#N/A	#N/A	#N/A	#N/A	#N/A
1982Q1	#N/A	#N/A	#N/A	#N/A	#N/A	#N/A	#N/A	#N/A	#N/A	#N/A	#N/A	#N/A	#N/A	#N/A	#N/A
1982Q2	#N/A	#N/A	#N/A	#N/A	#N/A	#N/A	#N/A	#N/A	#N/A	#N/A	#N/A	#N/A	#N/A	#N/A	#N/A
1982Q3	#N/A	#N/A	#N/A	#N/A	#N/A	#N/A	#N/A	#N/A	#N/A	#N/A	#N/A	#N/A	#N/A	#N/A	#N/A
1982Q4	#N/A	#N/A	#N/A	#N/A	#N/A	#N/A	#N/A	#N/A	#N/A	#N/A	#N/A	#N/A	#N/A	#N/A	#N/A
1983Q1	#N/A	#N/A	#N/A	#N/A	#N/A	#N/A	#N/A	#N/A	#N/A	#N/A	#N/A	#N/A	#N/A	#N/A	#N/A
1983Q2	#N/A	#N/A	#N/A	#N/A	#N/A	#N/A	#N/A	#N/A	#N/A	#N/A	#N/A	#N/A	#N/A	#N/A	#N/A
1983Q3	#N/A	#N/A	#N/A	#N/A	#N/A	#N/A	#N/A	#N/A	#N/A	#N/A	#N/A	#N/A	#N/A	#N/A	#N/A
1983Q4	#N/A	#N/A	#N/A	#N/A	#N/A	#N/A	#N/A	#N/A	#N/A	#N/A	#N/A	#N/A	#N/A	#N/A	#N/A
1984Q1	#N/A	#N/A	#N/A	#N/A	#N/A	#N/A	#N/A	#N/A	#N/A	#N/A	#N/A	#N/A	#N/A	#N/A	#N/A
1984Q2	#N/A	#N/A	#N/A	#N/A	#N/A	#N/A	#N/A	#N/A	#N/A	#N/A	#N/A	#N/A	#N/A	#N/A	#N/A
1984Q3	#N/A	#N/A	#N/A	#N/A	#N/A	#N/A	#N/A	#N/A	#N/A	#N/A	#N/A	#N/A	#N/A	#N/A	#N/A
1984Q4	#N/A	#N/A	#N/A	#N/A	#N/A	#N/A	#N/A	#N/A	#N/A	#N/A	#N/A	#N/A	#N/A	#N/A	#N/A
1985Q1	#N/A	#N/A	#N/A	#N/A	#N/A	#N/A	#N/A	#N/A	#N/A	#N/A	#N/A	#N/A	#N/A	#N/A	#N/A
1985Q2	#N/A	#N/A	#N/A	#N/A	#N/A	#N/A	#N/A	#N/A	#N/A	#N/A	#N/A	#N/A	#N/A	#N/A	#N/A
1985Q3	#N/A	#N/A	#N/A	#N/A	#N/A	#N/A	#N/A	#N/A	#N/A	#N/A	#N/A	#N/A	#N/A	#N/A	#N/A
1985Q4	#N/A	#N/A	#N/A	#N/A	#N/A	#N/A	#N/A	#N/A	#N/A	#N/A	#N/A	#N/A	#N/A	#N/A	#N/A
1986Q1	#N/A	#N/A	#N/A	#N/A	#N/A	#N/A	#N/A	#N/A	#N/A	#N/A	#N/A	#N/A	#N/A	#N/A	#N/A
1986Q2	#N/A	#N/A	#N/A	#N/A	#N/A	#N/A	#N/A	#N/A	#N/A	#N/A	#N/A	#N/A	#N/A	#N/A	#N/A
1986Q3	#N/A	#N/A	#N/A	#N/A	#N/A	#N/A	#N/A	#N/A	#N/A	#N/A	#N/A	#N/A	#N/A	#N/A	#N/A
1986Q4	#N/A	#N/A	#N/A	#N/A	#N/A	#N/A	#N/A	#N/A	#N/A	#N/A	#N/A	#N/A	#N/A	#N/A	#N/A
1987Q1	#N/A	#N/A	#N/A	#N/A	#N/A	#N/A	#N/A	#N/A	#N/A	#N/A	#N/A	#N/A	#N/A	#N/A	#N/A
1987Q2	#N/A	#N/A	#N/A	#N/A	#N/A	#N/A	#N/A	#N/A	#N/A	#N/A	#N/A	#N/A	#N/A	#N/A	#N/A
1987Q3	#N/A	#N/A	#N/A	#N/A	#N/A	#N/A	#N/A	#N/A	#N/A	#N/A	#N/A	#N/A	#N/A	#N/A	#N/A
1987Q4	#N/A	#N/A	#N/A	#N/A	#N/A	#N/A	#N/A	#N/A	#N/A	#N/A	#N/A	#N/A	#N/A	#N/A	#N/A
1988Q1	#N/A	#N/A	#N/A	#N/A	#N/A	#N/A	#N/A	#N/A	#N/A	#N/A	#N/A	#N/A	#N/A	#N/A	#N/A
1988Q2	#N/A	#N/A	#N/A	#N/A	#N/A	#N/A	#N/A	#N/A	#N/A	#N/A	#N/A	#N/A	#N/A	#N/A	#N/A
1988Q3	#N/A	#N/A	#N/A	#N/A	#N/A	#N/A	#N/A	#N/A	#N/A	#N/A	#N/A	#N/A	#N/A	#N/A	#N/A
1988Q4	#N/A	#N/A	#N/A	#N/A	#N/A	#N/A	#N/A	#N/A	#N/A	#N/A	#N/A	#N/A	#N/A	#N/A	#N/A
1989Q1	#N/A	#N/A	#N/A	#N/A	#N/A	#N/A	#N/A	#N/A	#N/A	#N/A	#N/A	#N/A	#N/A	#N/A	#N/A
1989Q2	#N/A	#N/A	#N/A	#N/A	#N/A	#N/A	#N/A	#N/A	#N/A	#N/A	#N/A	#N/A	#N/A	#N/A	#N/A
1989Q3	#N/A	#N/A	#N/A	#N/A	#N/A	#N/A	#N/A	#N/A	#N/A	#N/A	#N/A	#N/A	#N/A	#N/A	#N/A
1989Q4	#N/A	#N/A	#N/A	#N/A	#N/A	#N/A	#N/A	#N/A	#N/A	#N/A	#N/A	#N/A	#N/A	#N/A	#N/A
1990Q1	#N/A	#N/A	#N/A	#N/A	#N/A	#N/A	#N/A	#N/A	#N/A	#N/A	#N/A	#N/A	#N/A	#N/A	#N/A
1990Q2	#N/A	#N/A	#N/A	#N/A	#N/A	#N/A	#N/A	#N/A	#N/A	#N/A	#N/A	#N/A	#N/A	#N/A	#N/A
1990Q3	#N/A	#N/A	#N/A	#N/A	#N/A	#N/A	#N/A	#N/A	#N/A	#N/A	#N/A	#N/A	#N/A	#N/A	#N/A
1990Q4	#N/A	#N/A	#N/A	#N/A	#N/A	#N/A	#N/A	#N/A	#N/A	#N/A	#N/A	#N/A	#N/A	#N/A	#N/A
1991Q1	#N/A	#N/A	#N/A	#N/A	#N/A	#N/A	#N/A	#N/A	#N/A	#N/A	#N/A	#N/A	#N/A	#N/A	#N/A
1991Q2	#N/A	#N/A	#N/A	#N/A	#N/A	#N/A	#N/A	#N/A	#N/A	#N/A	#N/A	#N/A	#N/A	#N/A	#N/A
1991Q3	#N/A	#N/A	#N/A	#N/A	#N/A	#N/A	#N/A	#N/A	#N/A	#N/A	#N/A	#N/A	#N/A	#N/A	#N/A
1991Q4	#N/A	#N/A	#N/A	#N/A	#N/A	#N/A	#N/A	#N/A	#N/A	#N/A	#N/A	#N/A	#N/A	#N/A	#N/A
1992Q1	#N/A	#N/A	#N/A	#N/A	#N/A	#N/A	#N/A	#N/A	#N/A	#N/A	#N/A	#N/A	#N/A	#N/A	#N/A
1992Q2	#N/A	#N/A	#N/A	#N/A	#N/A	#N/A	#N/A	#N/A	#N/A	#N/A	#N/A	#N/A	#N/A	#N/A	#N/A
1992Q3	#N/A	#N/A	#N/A	#N/A	#N/A	#N/A	#N/A	#N/A	#N/A	#N/A	#N/A	#N/A	#N/A	#N/A	#N/A
1992Q4	#N/A	#N/A	#N/A	#N/A	#N/A	#N/A	#N/A	#N/A	#N/A	#N/A	#N/A	#N/A	#N/A	#N/A	#N/A
1993Q1	#N/A	#N/A	#N/A	#N/A	#N/A	#N/A	#N/A	#N/A	#N/A	#N/A	#N/A	#N/A	#N/A	#N/A	#N/A
1993Q2	#N/A	#N/A	#N/A	#N/A	#N/A	#N/A	#N/A	#N/A	#N/A	#N/A	#N/A	#N/A	#N/A	#N/A	#N/A
1993Q3	#N/A	#N/A	#N/A	#N/A	#N/A	#N/A	#N/A	#N/A	#N/A	#N/A	#N/A	#N/A	#N/A	#N/A	#N/A
1993Q4	#N/A	#N/A	#N/A	#N/A	#N/A	#N/A	#N/A	#N/A	#N/A	#N/A	#N/A	#N/A	#N/A	#N/A	#N/A
1994Q1	#N/A	#N/A	#N/A	#N/A	#N/A	#N/A	#N/A	#N/A	#N/A	#N/A	#N/A	#N/A	#N/A	#N/A	#N/A
1994Q2	#N/A	#N/A	#N/A	#N/A	#N/A	#N/A	#N/A	#N/A	#N/A	#N/A	#N/A	#N/A	#N/A	#N/A	#N/A
1994Q3	#N/A	#N/A	#N/A	#N/A	#N/A	#N/A	#N/A	#N/A	#N/A	#N/A	#N/A	#N/A	#N/A	#N/A	#N/A
1994Q4	#N/A	#N/A	#N/A	#N/A	#N/A	#N/A	#N/A	#N/A	#N/A	#N/A	#N/A	#N/A	#N/A	#N/A	#N/A
1995Q1	#N/A	#N/A	#N/A	#N/A	#N/A	#N/A	#N/A	#N/A	#N/A	#N/A	#N/A	#N/A	#N/A	#N/A	#N/A
1995Q2	#N/A	#N/A	#N/A	#N/A	#N/A	#N/A	#N/A	#N/A	#N/A	#N/A	#N/A	#N/A	#N/A	#N/A	#N/A
1995Q3	#N/A	#N/A	#N/A	#N/A	#N/A	#N/A	#N/A	#N/A	#N/A	#N/A	#N/A	#N/A	#N/A	#N/A	#N/A
1995Q4	#N/A	#N/A	#N/A	#N/A	#N/A	#N/A	#N/A	#N/A	#N/A	#N/A	#N/A	#N/A	#N/A	#N/A	#N/A
1996Q1	#N/A	#N/A	#N/A	#N/A	#N/A	#N/A	#N/A	#N/A	#N/A	#N/A	#N/A	#N/A	#N/A	#N/A	#N/A
1996Q2	#N/A	#N/A	#N/A	#N/A	#N/A	#N/A	#N/A	#N/A	#N/A	#N/A	#N/A	#N/A	#N/A	#N/A	#N/A
1996Q3	#N/A	#N/A	#N/A	#N/A	#N/A	#N/A	#N/A	#N/A	#N/A	#N/A	#N/A	#N/A	#N/A	#N/A	#N/A
1996Q4	#N/A	#N/A	#N/A	#N/A	#N/A	#N/A	#N/A	#N/A	#N/A	#N/A	#N/A	#N/A	#N/A	#N/A	#N/A
1997Q1	#N/A	#N/A	#N/A	#N/A	#N/A	#N/A	#N/A	#N/A	#N/A	#N/A	#N/A	#N/A	#N/A	#N/A	#N/A
1997Q2	#N/A	#N/A	#N/A	#N/A	#N/A	#N/A	#N/A	#N/A	#N/A	#N/A	#N/A	#N/A	#N/A	#N/A	#N/A
1997Q3	#N/A	#N/A	#N/A	#N/A	#N/A	#N/A	#N/A	#N/A	#N/A	#N/A	#N/A	#N/A	#N/A	#N/A	#N/A
1997Q4	#N/A	#N/A	#N/A	#N/A	#N/A	#N/A	#N/A	#N/A	#N/A	#N/A	#N/A	#N/A	#N/A	#N/A	#N/A
1998Q1	#N/A	#N/A	#N/A	#N/A	#N/A	#N/A	#N/A	#N/A	#N/A	#N/A	#N/A	#N/A	#N/A	#N/A	#N/A
1998Q2	#N/A	#N/A	#N/A	#N/A	#N/A	#N/A	#N/A	#N/A	#N/A	#N/A	#N/A	#N/A	#N/A	#N/A	#N/A
1998Q3	#N/A	#N/A	#N/A	#N/A	#N/A	#N/A	#N/A	#N/A	#N/A	#N/A	#N/A	#N/A	#N/A	#N/A	#N/A
1998Q4	#N/A	#N/A	#N/A	#N/A	#N/A	#N/A	#N/A	#N/A	#N/A	#N/A	#N/A	#N/A	#N/A	#N/A	#N/A
1999Q1	#N/A	#N/A	#N/A	#N/A	#N/A	#N/A	#N/A	#N/A	#N/A	#N/A	#N/A	#N/A	#N/A	#N/A	#N/A
1999Q2	#N/A	#N/A	#N/A	#N/A	#N/A	#N/A	#N/A	#N/A	#N/A	#N/A	#N/A	#N/A	#N/A	#N/A	#N/A
1999Q3	#N/A	#N/A	#N/A	#N/A	#N/A	#N/A	#N/A	#N/A	#N/A	#N/A	#N/A	#N/A	#N/A	#N/A	#N/A
1999Q4	#N/A	#N/A	#N/A	#N/A	#N/A	#N/A	#N/A	#N/A	#N/A	#N/A	#N/A	#N/A	#N/A	#N/A	#N/A
2000Q1	#N/A	#N/A	#N/A	#N/A	#N/A	#N/A	#N/A	#N/A	#N/A	#N/A	#N/A	#N/A	#N/A	#N/A	#N/A
2000Q2	#N/A	#N/A	#N/A	#N/A	#N/A	#N/A	#N/A	#N/A	#N/A	#N/A	#N/A	#N/A	#N/A	#N/A	#N/A
2000Q3	#N/A	#N/A	#N/A	#N/A	#N/A	#N/A	#N/A	#N/A	#N/A	#N/A	#N/A	#N/A	#N/A	#N/A	#N/A
2000Q4	#N/A	#N/A	#N/A	#N/A	#N/A	#N/A	#N/A	#N/A	#N/A	#N/A	#N/A	#N/A	#N/A	#N/A	#N/A
2001Q1	#N/A	#N/A	#N/A	#N/A	#N/A	#N/A	#N/A	#N/A	#N/A	#N/A	#N/A	#N/A	#N/A	#N/A	#N/A
2001Q2	#N/A	#N/A	#N/A	#N/A	#N/A	#N/A	#N/A	#N/A	#N/A	#N/A	#N/A	#N/A	#N/A	#N/A	#N/A
2001Q3	#N/A	#N/A	#N/A	#N/A	#N/A	#N/A	#N/A	#N/A	#N/A	#N/A	#N/A	#N/A	#N/A	#N/A	#N/A
2001Q4	#N/A	#N/A	#N/A	#N/A	#N/A	#N/A	#N/A	#N/A	#N/A	#N/A	#N/A	#N/A	#N/A	#N/A	#N/A
2002Q1	#N/A	#N/A	#N/A	#N/A	#N/A	#N/A	#N/A	#N/A	#N/A	#N/A	#N/A	#N/A	#N/A	#N/A	#N/A
2002Q2	#N/A	#N/A	#N/A	#N/A	#N/A	#N/A	#N/A	#N/A	#N/A	#N/A	#N/A	#N/A	#N/A	#N/A	#N/A
2002Q3	#N/A	#N/A	#N/A	#N/A	#N/A	#N/A	#N/A	#N/A	#N/A	#N/A	#N/A	#N/A	#N/A	#N/A	#N/A
2002Q4	#N/A	#N/A	#N/A	#N/A	#N/A	#N/A	#N/A	#N/A	#N/A	#N/A	#N/A	#N/A	#N/A	#N/A	#N/A
2003Q1	#N/A	#N/A	#N/A	#N/A	#N/A	#N/A	#N/A	#N/A	#N/A	#N/A	#N/A	#N/A	#N/A	#N/A	#N/A
2003Q2	#N/A	#N/A	#N/A	#N/A	#N/A	#N/A	#N/A	#N/A	#N/A	#N/A	#N/A	#N/A	#N/A	#N/A	#N/A
2003Q3	#N/A	#N/A	#N/A	#N/A	#N/A	#N/A	#N/A	#N/A	#N/A	#N/A	#N/A	#N/A	#N/A	#N/A	#N/A
2003Q4	#N/A	#N/A	#N/A	#N/A	#N/A	#N/A	#N/A	#N/A	#N/A	#N/A	#N/A	#N/A	#N/A	#N/A	#N/A
2004Q1	#N/A	#N/A	#N/A	#N/A	#N/A	#N/A	#N/A	#N/A	#N/A	#N/A	#N/A	#N/A	#N/A	#N/A	#N/A
2004Q2	#N/A	#N/A	#N/A	#N/A	#N/A	#N/A	#N/A	#N/A	#N/A	#N/A	#N/A	#N/A	#N/A	#N/A	#N/A
2004Q3	#N/A	#N/A	#N/A	#N/A	#N/A	#N/A	#N/A	#N/A	#N/A	#N/A	#N/A	#N/A	#N/A	#N/A	#N/A
2004Q4	#N/A	#N/A	#N/A	#N/A	#N/A	#N/A	#N/A	#N/A	#N/A	#N/A	#N/A	#N/A	#N/A	#N/A	#N/A
2005Q1	#N/A	#N/A	#N/A	#N/A	#N/A	#N/A	#N/A	#N/A	#N/A	#N/A	#N/A	#N/A	#N/A	#N/A	#N/A
2005Q2	#N/A	#N/A	#N/A	#N/A	#N/A	#N/A	#N/A	#N/A	#N/A	#N/A	#N/A	#N/A	#N/A	#N/A	#N/A
2005Q3	#N/A	#N/A	#N/A	#N/A	#N/A	#N/A	#N/A	#N/A	#N/A	#N/A	#N/A	#N/A	#N/A	#N/A	#N/A
2005Q4	#N/A	#N/A	#N/A	#N/A	#N/A	#N/A	#N/A	#N/A	#N/A	#N/A	#N/A	#N/A	#N/A	#N/A	#N/A
2006Q1	#N/A	#N/A	#N/A	#N/A	#N/A	#N/A	#N/A	#N/A	#N/A	#N/A	#N/A	#N/A	#N/A	#N/A	#N/A
2006Q2	#N/A	#N/A	#N/A	#N/A	#N/A	#N/A	#N/A	#N/A	#N/A	#N/A	#N/A	#N/A	#N/A	#N/A	#N/A
2006Q3	#N/A	#N/A	#N/A	#N/A	#N/A	#N/A	#N/A	#N/A	#N/A	#N/A	#N/A	#N/A	#N/A	#N/A	#N/A
2006Q4	#N/A	#N/A	#N/A	#N/A	#N/A	#N/A	#N/A	#N/A	#N/A	#N/A	#N/A	#N/A	#N/A	#N/A	#N/A
2007Q1	#N/A	#N/A	#N/A	#N/A	#N/A	#N/A	#N/A	#N/A	#N/A	#N/A	#N/A	#N/A	#N/A	#N/A	#N/A
2007Q2	#N/A	#N/A	#N/A	#N/A	#N/A	#N/A	#N/A	#N/A	#N/A	#N/A	#N/A	#N/A	#N/A	#N/A	#N/A
2007Q3	#N/A	#N/A	#N/A	#N/A	#N/A	#N/A	#N/A	#N/A	#N/A	#N/A	#N/A	#N/A	#N/A	#N/A	#N/A
2007Q4	#N/A	#N/A	#N/A	#N/A	#N/A	#N/A	#N/A	#N/A	#N/A	#N/A	#N/A	#N/A	#N/A	#N/A	#N/A
2008Q1	#N/A	#N/A	#N/A	#N/A	#N/A	#N/A	#N/A	#N/A	#N/A	#N/A	#N/A	#N/A	#N/A	#N/A	#N/A
2008Q2	#N/A	#N/A	#N/A	#N/A	#N/A	#N/A	#N/A	#N/A	#N/A	#N/A	#N/A	#N/A	#N/A	#N/A	#N/A
2008Q3	#N/A	#N/A	#N/A	#N/A	#N/A	#N/A	#N/A	#N/A	#N/A	#N/A	#N/A	#N/A	#N/A	#N/A	#N/A
2008Q4	#N/A	#N/A	#N/A	#N/A	#N/A	#N/A	#N/A	#N/A	#N/A	#N/A	#N/A	#N/A	#N/A	#N/A	#N/A
2009Q1	#N/A	#N/A	#N/A	#N/A	#N/A	#N/A	#N/A	#N/A	#N/A	#N/A	#N/A	#N/A	#N/A	#N/A	#N/A
2009Q2	#N/A	#N/A	#N/A	#N/A	#N/A	#N/A	#N/A	#N/A	#N/A	#N/A	#N/A	#N/A	#N/A	#N/A	#N/A
2009Q3	#N/A	#N/A	#N/A	#N/A	#N/A	#N/A	#N/A	#N/A	#N/A	#N/A	#N/A	#N/A	#N/A	#N/A	#N/A
2009Q4	#N/A	#N/A	#N/A	#N/A	#N/A	#N/A	#N/A	#N/A	#N/A	#N/A	#N/A	#N/A	#N/A	#N/A	#N/A
2010Q1	6.25	6.45	0.2	6.3	6.6	0.3	6.35	6.9549	0.6049	6.3	7.1	0.8	6.3617	7.3	0.9383
2010Q2	6.15	6.4384	0.2884	6.2581	6.6	0.3419	6.2767	6.7931	0.5164	6.39	6.9014	0.5114	6.48	7.01	0.53
2010Q3	5.89	6.0835	0.1935	5.95	6.2726	0.3226	6.09	6.411	0.321	6	6.65	0.65	6.18	6.8114	0.6314
2010Q4	5.55	5.7767	0.2267	5.49	5.7817	0.2917	5.4531	6.041	0.5879	5.5049	6.2	0.6951	5.6967	6.53	0.8333
2011Q1	6.08	6.3	0.22	6.06	6.42	0.36	6.1	6.4	0.3	6.13	6.6	0.47	6.1467	6.7	0.5533
2011Q2	5.9985	6.1442	0.1457	6.1	6.4	0.3	6.2	6.56	0.36	6.2	6.75	0.55	6.31	6.9879	0.6779
2011Q3	5.5	5.95	0.45	5.551	6.15	0.599	5.615	6.2472	0.6322	5.6463	6.3881	0.7418	5.7089	6.6	0.8911
2011Q4	5.18	5.4266	0.2466	5.2267	5.5	0.2733	5.2	5.6	0.4	5.25	5.7	0.45	5.3251	5.8	0.4749
2012Q1	5.19	5.3101	0.1201	5.11	5.3616	0.2516	5.1	5.4	0.3	5.2	5.555	0.355	5.3	5.7	0.4
2012Q2	5.125	5.27	0.145	5.1695	5.4	0.2305	5.2	5.5	0.3	5.2	5.7	0.5	5.28	5.9	0.62
2012Q3	4.78	5	0.22	4.8	5.08	0.28	4.85	5.25	0.4	4.85	5.4	0.55	5	5.6	0.6
2012Q4	4.6322	4.925	0.2928	4.7433	5	0.2567	4.74	5.1685	0.4285	4.8384	5.2774	0.439	5	5.45	0.45
2013Q1	4.6776	4.87	0.1924	4.7	5	0.3	4.7759	5.1361	0.3603	4.9	5.3	0.4	4.965	5.4751	0.5101
2013Q2	4.58	4.85	0.27	4.7	5	0.3	4.78	5.11	0.33	4.9	5.25	0.35	5.03	5.45	0.42
2013Q3	5.1147	5.3718	0.2571	5.2339	5.46	0.2261	5.2928	5.61	0.3172	5.3866	5.8095	0.4229	5.35	6	0.65
2013Q4	5.35	5.54	0.19	5.45	5.62	0.17	5.5	5.8	0.3	5.6	5.95	0.35	5.6	6.16	0.56
2014Q1	5.21	5.5829	0.3729	5.39	5.7	0.31	5.5065	5.8	0.2935	5.57	5.9147	0.3447	5.65	6.07	0.42
2014Q2	4.924	5.22	0.296	5.1	5.4147	0.3147	5.1706	5.6	0.4294	5.277	5.7551	0.4781	5.4	5.8536	0.4536
2014Q3	4.8	5.0163	0.2163	4.925	5.425	0.5	5.05	5.6	0.55	5.2605	5.8253	0.5648	5.4033	6.0588	0.6554
2014Q4	4.7387	4.85	0.1113	4.82	5.1652	0.3452	4.9	5.45	0.55	5	5.53	0.53	5.1	5.7708	0.6708
2015Q1	4.48	4.74	0.26	4.54	4.8668	0.3268	4.7	5.25	0.55	4.82	5.269	0.449	5	5.5634	0.5634
2015Q2	4.57	4.7492	0.1792	4.75	4.9	0.15	4.8	5.06	0.26	4.95	5.25	0.3	5	5.665	0.665
2015Q3	4.945	5.25	0.305	5	5.375	0.375	5.125	5.5096	0.3846	5.205	5.76	0.555	5.325	5.8904	0.5654
2015Q4	5.2148	5.415	0.2002	5.325	5.54	0.215	5.4033	5.7325	0.3292	5.4128	5.9245	0.5116	5.4617	6	0.5383
2016Q1	5.34	5.5	0.16	5.35	5.6257	0.2757	5.3626	5.8	0.4374	5.5	5.8489	0.3489	5.4424	6.05	0.6076
2016Q2	4.8267	5.3	0.4733	4.98	5.4497	0.4697	5.1	5.6	0.5	5.05	5.7	0.65	5.14	5.7306	0.5906
2016Q3	4.3177	4.6113	0.2936	4.44	4.8	0.36	4.51	5.2	0.69	4.6374	5.3	0.6627	4.7167	5.4802	0.7635
2016Q4	4.3682	4.51	0.1418	4.5	4.8	0.3	4.5	4.95	0.45	4.6	5.2	0.6	4.61	5.36	0.75
2017Q1	4.7253	4.9	0.1747	4.8404	5.115	0.2746	4.98	5.3	0.32	5.0797	5.5	0.4203	5.1276	5.794	0.6663
2017Q2	4.6	4.71	0.11	4.7304	5	0.2696	4.8296	5.17	0.3404	4.95	5.52	0.57	5.08	5.63	0.55
2017Q3	4.45	4.58	0.13	4.5217	4.88	0.3583	4.68	5.08	0.4	4.79	5.35	0.56	4.8	5.5	0.7
2017Q4	4.33	4.525	0.195	4.4403	4.74	0.2997	4.5567	5.05	0.4933	4.6592	5.2802	0.621	4.655	5.4615	0.8065
2018Q1	4.375	4.6409	0.2659	4.5533	4.8014	0.2481	4.6582	5.025	0.3668	4.7874	5.25	0.4626	4.9233	5.4268	0.5035
2018Q2	4.72	4.8223	0.1023	4.9004	5	0.0996	5	5.25	0.25	5.1	5.6	0.5	5.25	5.8	0.55
2018Q3	4.818	5	0.182	4.9867	5.25	0.2633	5.07	5.46	0.39	5.13	5.66	0.53	5.2	5.85	0.65
2018Q4	4.95	5.15	0.2	5.04	5.4	0.36	5.07	5.6	0.53	5.2	5.8	0.6	5.2	5.9135	0.7135
2019Q1	4.993	5.16	0.167	5.1	5.2655	0.1655	5.17	5.44	0.27	5.2	5.5	0.3	5.307	5.86	0.553
2019Q2	4.7	4.91	0.21	4.78	4.97	0.19	4.81	5.21	0.4	4.8212	5.35	0.5288	4.8811	5.5	0.6189
2019Q3	4.1465	4.4742	0.3277	4.2633	4.5564	0.2931	4.3136	4.7	0.3864	4.42	4.7898	0.3698	4.455	4.9484	0.4934
2019Q4	3.9	4.0323	0.1323	3.9	4.1908	0.2908	3.95	4.35	0.4	4	4.4	0.4	4.0709	4.45	0.3791
2020Q1	3.7467	3.97	0.2233	3.838	4.15	0.312	3.8846	4.25	0.3654	3.9159	4.4	0.4841	4.008	4.5	0.492
2020Q2	3.87	4.085	0.215	3.6	4.22	0.62	3.58	4.2	0.62	3.6	4.3	0.7	3.6037	4.34	0.7363
2020Q3	3.2	3.92	0.72	3.3	3.93	0.63	3.3793	3.93	0.5507	3.5	4.0034	0.5034	3.33	4.145	0.815
2020Q4	3.3191	3.4233	0.1042	3.1375	3.52	0.3825	3.25	3.65	0.4	3.31	4.0214	0.7114	3.34	4.1	0.76
2021Q1	3.35	3.5	0.15	3.41	3.6	0.19	3.51	3.7	0.19	3.55	4.0461	0.4961	3.5701	4.1	0.5299
2021Q2	3.6	3.9931	0.3931	3.734	4.172	0.438	3.8061	4.3	0.4939	3.8416	4.4	0.5584	3.9159	4.52	0.6041
2021Q3	3.2968	3.63	0.3332	3.4	3.9119	0.5119	3.6	4.3	0.7	3.695	4.4	0.705	3.755	4.4	0.645
2021Q4	3.4	3.6667	0.2667	3.5477	3.9019	0.3542	3.6777	4.0456	0.3679	3.745	4.2834	0.5384	3.9	4.449	0.549

## Sheet: TBOND
Measures of Cross-Sectional Dispersion for Quarterly Forecasts for 10-YEAR TREASURY BOND YIELD (TBOND)
Units: Percent p.a.
Dispersion Measure D1 = 75th Percentile Minus 25th Percentile of the Forecasts for Levels
P25 = 25th Percentile of the Forecasts for Levels
P75 = 75th Percentile of the Forecasts for Levels
At Each Survey Date T, the Quarterly Horizons Are T, T+1, T+2, T+3, and T+4
Survey_Date(T)	TBOND_P25_D1(T)	TBOND_P75_D1(T)	TBOND_D1(T)	TBOND_P25_D1(T+1)	TBOND_P75_D1(T+1)	TBOND_D1(T+1)	TBOND_P25_D1(T+2)	TBOND_P75_D1(T+2)	TBOND_D1(T+2)	TBOND_P25_D1(T+3)	TBOND_P75_D1(T+3)	TBOND_D1(T+3)	TBOND_P25_D1(T+4)	TBOND_P75_D1(T+4)	TBOND_D1(T+4)
1968Q4	#N/A	#N/A	#N/A	#N/A	#N/A	#N/A	#N/A	#N/A	#N/A	#N/A	#N/A	#N/A	#N/A	#N/A	#N/A
1969Q1	#N/A	#N/A	#N/A	#N/A	#N/A	#N/A	#N/A	#N/A	#N/A	#N/A	#N/A	#N/A	#N/A	#N/A	#N/A
1969Q2	#N/A	#N/A	#N/A	#N/A	#N/A	#N/A	#N/A	#N/A	#N/A	#N/A	#N/A	#N/A	#N/A	#N/A	#N/A
1969Q3	#N/A	#N/A	#N/A	#N/A	#N/A	#N/A	#N/A	#N/A	#N/A	#N/A	#N/A	#N/A	#N/A	#N/A	#N/A
1969Q4	#N/A	#N/A	#N/A	#N/A	#N/A	#N/A	#N/A	#N/A	#N/A	#N/A	#N/A	#N/A	#N/A	#N/A	#N/A
1970Q1	#N/A	#N/A	#N/A	#N/A	#N/A	#N/A	#N/A	#N/A	#N/A	#N/A	#N/A	#N/A	#N/A	#N/A	#N/A
1970Q2	#N/A	#N/A	#N/A	#N/A	#N/A	#N/A	#N/A	#N/A	#N/A	#N/A	#N/A	#N/A	#N/A	#N/A	#N/A
1970Q3	#N/A	#N/A	#N/A	#N/A	#N/A	#N/A	#N/A	#N/A	#N/A	#N/A	#N/A	#N/A	#N/A	#N/A	#N/A
1970Q4	#N/A	#N/A	#N/A	#N/A	#N/A	#N/A	#N/A	#N/A	#N/A	#N/A	#N/A	#N/A	#N/A	#N/A	#N/A
1971Q1	#N/A	#N/A	#N/A	#N/A	#N/A	#N/A	#N/A	#N/A	#N/A	#N/A	#N/A	#N/A	#N/A	#N/A	#N/A
1971Q2	#N/A	#N/A	#N/A	#N/A	#N/A	#N/A	#N/A	#N/A	#N/A	#N/A	#N/A	#N/A	#N/A	#N/A	#N/A
1971Q3	#N/A	#N/A	#N/A	#N/A	#N/A	#N/A	#N/A	#N/A	#N/A	#N/A	#N/A	#N/A	#N/A	#N/A	#N/A
1971Q4	#N/A	#N/A	#N/A	#N/A	#N/A	#N/A	#N/A	#N/A	#N/A	#N/A	#N/A	#N/A	#N/A	#N/A	#N/A
1972Q1	#N/A	#N/A	#N/A	#N/A	#N/A	#N/A	#N/A	#N/A	#N/A	#N/A	#N/A	#N/A	#N/A	#N/A	#N/A
1972Q2	#N/A	#N/A	#N/A	#N/A	#N/A	#N/A	#N/A	#N/A	#N/A	#N/A	#N/A	#N/A	#N/A	#N/A	#N/A
1972Q3	#N/A	#N/A	#N/A	#N/A	#N/A	#N/A	#N/A	#N/A	#N/A	#N/A	#N/A	#N/A	#N/A	#N/A	#N/A
1972Q4	#N/A	#N/A	#N/A	#N/A	#N/A	#N/A	#N/A	#N/A	#N/A	#N/A	#N/A	#N/A	#N/A	#N/A	#N/A
1973Q1	#N/A	#N/A	#N/A	#N/A	#N/A	#N/A	#N/A	#N/A	#N/A	#N/A	#N/A	#N/A	#N/A	#N/A	#N/A
1973Q2	#N/A	#N/A	#N/A	#N/A	#N/A	#N/A	#N/A	#N/A	#N/A	#N/A	#N/A	#N/A	#N/A	#N/A	#N/A
1973Q3	#N/A	#N/A	#N/A	#N/A	#N/A	#N/A	#N/A	#N/A	#N/A	#N/A	#N/A	#N/A	#N/A	#N/A	#N/A
1973Q4	#N/A	#N/A	#N/A	#N/A	#N/A	#N/A	#N/A	#N/A	#N/A	#N/A	#N/A	#N/A	#N/A	#N/A	#N/A
1974Q1	#N/A	#N/A	#N/A	#N/A	#N/A	#N/A	#N/A	#N/A	#N/A	#N/A	#N/A	#N/A	#N/A	#N/A	#N/A
1974Q2	#N/A	#N/A	#N/A	#N/A	#N/A	#N/A	#N/A	#N/A	#N/A	#N/A	#N/A	#N/A	#N/A	#N/A	#N/A
1974Q3	#N/A	#N/A	#N/A	#N/A	#N/A	#N/A	#N/A	#N/A	#N/A	#N/A	#N/A	#N/A	#N/A	#N/A	#N/A
1974Q4	#N/A	#N/A	#N/A	#N/A	#N/A	#N/A	#N/A	#N/A	#N/A	#N/A	#N/A	#N/A	#N/A	#N/A	#N/A
1975Q1	#N/A	#N/A	#N/A	#N/A	#N/A	#N/A	#N/A	#N/A	#N/A	#N/A	#N/A	#N/A	#N/A	#N/A	#N/A
1975Q2	#N/A	#N/A	#N/A	#N/A	#N/A	#N/A	#N/A	#N/A	#N/A	#N/A	#N/A	#N/A	#N/A	#N/A	#N/A
1975Q3	#N/A	#N/A	#N/A	#N/A	#N/A	#N/A	#N/A	#N/A	#N/A	#N/A	#N/A	#N/A	#N/A	#N/A	#N/A
1975Q4	#N/A	#N/A	#N/A	#N/A	#N/A	#N/A	#N/A	#N/A	#N/A	#N/A	#N/A	#N/A	#N/A	#N/A	#N/A
1976Q1	#N/A	#N/A	#N/A	#N/A	#N/A	#N/A	#N/A	#N/A	#N/A	#N/A	#N/A	#N/A	#N/A	#N/A	#N/A
1976Q2	#N/A	#N/A	#N/A	#N/A	#N/A	#N/A	#N/A	#N/A	#N/A	#N/A	#N/A	#N/A	#N/A	#N/A	#N/A
1976Q3	#N/A	#N/A	#N/A	#N/A	#N/A	#N/A	#N/A	#N/A	#N/A	#N/A	#N/A	#N/A	#N/A	#N/A	#N/A
1976Q4	#N/A	#N/A	#N/A	#N/A	#N/A	#N/A	#N/A	#N/A	#N/A	#N/A	#N/A	#N/A	#N/A	#N/A	#N/A
1977Q1	#N/A	#N/A	#N/A	#N/A	#N/A	#N/A	#N/A	#N/A	#N/A	#N/A	#N/A	#N/A	#N/A	#N/A	#N/A
1977Q2	#N/A	#N/A	#N/A	#N/A	#N/A	#N/A	#N/A	#N/A	#N/A	#N/A	#N/A	#N/A	#N/A	#N/A	#N/A
1977Q3	#N/A	#N/A	#N/A	#N/A	#N/A	#N/A	#N/A	#N/A	#N/A	#N/A	#N/A	#N/A	#N/A	#N/A	#N/A
1977Q4	#N/A	#N/A	#N/A	#N/A	#N/A	#N/A	#N/A	#N/A	#N/A	#N/A	#N/A	#N/A	#N/A	#N/A	#N/A
1978Q1	#N/A	#N/A	#N/A	#N/A	#N/A	#N/A	#N/A	#N/A	#N/A	#N/A	#N/A	#N/A	#N/A	#N/A	#N/A
1978Q2	#N/A	#N/A	#N/A	#N/A	#N/A	#N/A	#N/A	#N/A	#N/A	#N/A	#N/A	#N/A	#N/A	#N/A	#N/A
1978Q3	#N/A	#N/A	#N/A	#N/A	#N/A	#N/A	#N/A	#N/A	#N/A	#N/A	#N/A	#N/A	#N/A	#N/A	#N/A
1978Q4	#N/A	#N/A	#N/A	#N/A	#N/A	#N/A	#N/A	#N/A	#N/A	#N/A	#N/A	#N/A	#N/A	#N/A	#N/A
1979Q1	#N/A	#N/A	#N/A	#N/A	#N/A	#N/A	#N/A	#N/A	#N/A	#N/A	#N/A	#N/A	#N/A	#N/A	#N/A
1979Q2	#N/A	#N/A	#N/A	#N/A	#N/A	#N/A	#N/A	#N/A	#N/A	#N/A	#N/A	#N/A	#N/A	#N/A	#N/A
1979Q3	#N/A	#N/A	#N/A	#N/A	#N/A	#N/A	#N/A	#N/A	#N/A	#N/A	#N/A	#N/A	#N/A	#N/A	#N/A
1979Q4	#N/A	#N/A	#N/A	#N/A	#N/A	#N/A	#N/A	#N/A	#N/A	#N/A	#N/A	#N/A	#N/A	#N/A	#N/A
1980Q1	#N/A	#N/A	#N/A	#N/A	#N/A	#N/A	#N/A	#N/A	#N/A	#N/A	#N/A	#N/A	#N/A	#N/A	#N/A
1980Q2	#N/A	#N/A	#N/A	#N/A	#N/A	#N/A	#N/A	#N/A	#N/A	#N/A	#N/A	#N/A	#N/A	#N/A	#N/A
1980Q3	#N/A	#N/A	#N/A	#N/A	#N/A	#N/A	#N/A	#N/A	#N/A	#N/A	#N/A	#N/A	#N/A	#N/A	#N/A
1980Q4	#N/A	#N/A	#N/A	#N/A	#N/A	#N/A	#N/A	#N/A	#N/A	#N/A	#N/A	#N/A	#N/A	#N/A	#N/A
1981Q1	#N/A	#N/A	#N/A	#N/A	#N/A	#N/A	#N/A	#N/A	#N/A	#N/A	#N/A	#N/A	#N/A	#N/A	#N/A
1981Q2	#N/A	#N/A	#N/A	#N/A	#N/A	#N/A	#N/A	#N/A	#N/A	#N/A	#N/A	#N/A	#N/A	#N/A	#N/A
1981Q3	#N/A	#N/A	#N/A	#N/A	#N/A	#N/A	#N/A	#N/A	#N/A	#N/A	#N/A	#N/A	#N/A	#N/A	#N/A
1981Q4	#N/A	#N/A	#N/A	#N/A	#N/A	#N/A	#N/A	#N/A	#N/A	#N/A	#N/A	#N/A	#N/A	#N/A	#N/A
1982Q1	#N/A	#N/A	#N/A	#N/A	#N/A	#N/A	#N/A	#N/A	#N/A	#N/A	#N/A	#N/A	#N/A	#N/A	#N/A
1982Q2	#N/A	#N/A	#N/A	#N/A	#N/A	#N/A	#N/A	#N/A	#N/A	#N/A	#N/A	#N/A	#N/A	#N/A	#N/A
1982Q3	#N/A	#N/A	#N/A	#N/A	#N/A	#N/A	#N/A	#N/A	#N/A	#N/A	#N/A	#N/A	#N/A	#N/A	#N/A
1982Q4	#N/A	#N/A	#N/A	#N/A	#N/A	#N/A	#N/A	#N/A	#N/A	#N/A	#N/A	#N/A	#N/A	#N/A	#N/A
1983Q1	#N/A	#N/A	#N/A	#N/A	#N/A	#N/A	#N/A	#N/A	#N/A	#N/A	#N/A	#N/A	#N/A	#N/A	#N/A
1983Q2	#N/A	#N/A	#N/A	#N/A	#N/A	#N/A	#N/A	#N/A	#N/A	#N/A	#N/A	#N/A	#N/A	#N/A	#N/A
1983Q3	#N/A	#N/A	#N/A	#N/A	#N/A	#N/A	#N/A	#N/A	#N/A	#N/A	#N/A	#N/A	#N/A	#N/A	#N/A
1983Q4	#N/A	#N/A	#N/A	#N/A	#N/A	#N/A	#N/A	#N/A	#N/A	#N/A	#N/A	#N/A	#N/A	#N/A	#N/A
1984Q1	#N/A	#N/A	#N/A	#N/A	#N/A	#N/A	#N/A	#N/A	#N/A	#N/A	#N/A	#N/A	#N/A	#N/A	#N/A
1984Q2	#N/A	#N/A	#N/A	#N/A	#N/A	#N/A	#N/A	#N/A	#N/A	#N/A	#N/A	#N/A	#N/A	#N/A	#N/A
1984Q3	#N/A	#N/A	#N/A	#N/A	#N/A	#N/A	#N/A	#N/A	#N/A	#N/A	#N/A	#N/A	#N/A	#N/A	#N/A
1984Q4	#N/A	#N/A	#N/A	#N/A	#N/A	#N/A	#N/A	#N/A	#N/A	#N/A	#N/A	#N/A	#N/A	#N/A	#N/A
1985Q1	#N/A	#N/A	#N/A	#N/A	#N/A	#N/A	#N/A	#N/A	#N/A	#N/A	#N/A	#N/A	#N/A	#N/A	#N/A
1985Q2	#N/A	#N/A	#N/A	#N/A	#N/A	#N/A	#N/A	#N/A	#N/A	#N/A	#N/A	#N/A	#N/A	#N/A	#N/A
1985Q3	#N/A	#N/A	#N/A	#N/A	#N/A	#N/A	#N/A	#N/A	#N/A	#N/A	#N/A	#N/A	#N/A	#N/A	#N/A
1985Q4	#N/A	#N/A	#N/A	#N/A	#N/A	#N/A	#N/A	#N/A	#N/A	#N/A	#N/A	#N/A	#N/A	#N/A	#N/A
1986Q1	#N/A	#N/A	#N/A	#N/A	#N/A	#N/A	#N/A	#N/A	#N/A	#N/A	#N/A	#N/A	#N/A	#N/A	#N/A
1986Q2	#N/A	#N/A	#N/A	#N/A	#N/A	#N/A	#N/A	#N/A	#N/A	#N/A	#N/A	#N/A	#N/A	#N/A	#N/A
1986Q3	#N/A	#N/A	#N/A	#N/A	#N/A	#N/A	#N/A	#N/A	#N/A	#N/A	#N/A	#N/A	#N/A	#N/A	#N/A
1986Q4	#N/A	#N/A	#N/A	#N/A	#N/A	#N/A	#N/A	#N/A	#N/A	#N/A	#N/A	#N/A	#N/A	#N/A	#N/A
1987Q1	#N/A	#N/A	#N/A	#N/A	#N/A	#N/A	#N/A	#N/A	#N/A	#N/A	#N/A	#N/A	#N/A	#N/A	#N/A
1987Q2	#N/A	#N/A	#N/A	#N/A	#N/A	#N/A	#N/A	#N/A	#N/A	#N/A	#N/A	#N/A	#N/A	#N/A	#N/A
1987Q3	#N/A	#N/A	#N/A	#N/A	#N/A	#N/A	#N/A	#N/A	#N/A	#N/A	#N/A	#N/A	#N/A	#N/A	#N/A
1987Q4	#N/A	#N/A	#N/A	#N/A	#N/A	#N/A	#N/A	#N/A	#N/A	#N/A	#N/A	#N/A	#N/A	#N/A	#N/A
1988Q1	#N/A	#N/A	#N/A	#N/A	#N/A	#N/A	#N/A	#N/A	#N/A	#N/A	#N/A	#N/A	#N/A	#N/A	#N/A
1988Q2	#N/A	#N/A	#N/A	#N/A	#N/A	#N/A	#N/A	#N/A	#N/A	#N/A	#N/A	#N/A	#N/A	#N/A	#N/A
1988Q3	#N/A	#N/A	#N/A	#N/A	#N/A	#N/A	#N/A	#N/A	#N/A	#N/A	#N/A	#N/A	#N/A	#N/A	#N/A
1988Q4	#N/A	#N/A	#N/A	#N/A	#N/A	#N/A	#N/A	#N/A	#N/A	#N/A	#N/A	#N/A	#N/A	#N/A	#N/A
1989Q1	#N/A	#N/A	#N/A	#N/A	#N/A	#N/A	#N/A	#N/A	#N/A	#N/A	#N/A	#N/A	#N/A	#N/A	#N/A
1989Q2	#N/A	#N/A	#N/A	#N/A	#N/A	#N/A	#N/A	#N/A	#N/A	#N/A	#N/A	#N/A	#N/A	#N/A	#N/A
1989Q3	#N/A	#N/A	#N/A	#N/A	#N/A	#N/A	#N/A	#N/A	#N/A	#N/A	#N/A	#N/A	#N/A	#N/A	#N/A
1989Q4	#N/A	#N/A	#N/A	#N/A	#N/A	#N/A	#N/A	#N/A	#N/A	#N/A	#N/A	#N/A	#N/A	#N/A	#N/A
1990Q1	#N/A	#N/A	#N/A	#N/A	#N/A	#N/A	#N/A	#N/A	#N/A	#N/A	#N/A	#N/A	#N/A	#N/A	#N/A
1990Q2	#N/A	#N/A	#N/A	#N/A	#N/A	#N/A	#N/A	#N/A	#N/A	#N/A	#N/A	#N/A	#N/A	#N/A	#N/A
1990Q3	#N/A	#N/A	#N/A	#N/A	#N/A	#N/A	#N/A	#N/A	#N/A	#N/A	#N/A	#N/A	#N/A	#N/A	#N/A
1990Q4	#N/A	#N/A	#N/A	#N/A	#N/A	#N/A	#N/A	#N/A	#N/A	#N/A	#N/A	#N/A	#N/A	#N/A	#N/A
1991Q1	#N/A	#N/A	#N/A	#N/A	#N/A	#N/A	#N/A	#N/A	#N/A	#N/A	#N/A	#N/A	#N/A	#N/A	#N/A
1991Q2	#N/A	#N/A	#N/A	#N/A	#N/A	#N/A	#N/A	#N/A	#N/A	#N/A	#N/A	#N/A	#N/A	#N/A	#N/A
1991Q3	#N/A	#N/A	#N/A	#N/A	#N/A	#N/A	#N/A	#N/A	#N/A	#N/A	#N/A	#N/A	#N/A	#N/A	#N/A
1991Q4	#N/A	#N/A	#N/A	#N/A	#N/A	#N/A	#N/A	#N/A	#N/A	#N/A	#N/A	#N/A	#N/A	#N/A	#N/A
1992Q1	7.1	7.4	0.3	7.02	7.4	0.38	7.1	7.6	0.5	7.25	7.75	0.5	7.3	7.8	0.5
1992Q2	7.3	7.5	0.2	7.25	7.6	0.35	7.2	7.7	0.5	7.2	7.8	0.6	7.25	7.9	0.65
1992Q3	6.6	6.885	0.285	6.5	6.9	0.4	6.65	7.175	0.525	6.65	7.26	0.61	6.785	7.35	0.565
1992Q4	6.6	6.8	0.2	6.6	6.8	0.2	6.5	6.95	0.45	6.5	7	0.5	6.51	7.1	0.59
1993Q1	6.4	6.65	0.25	6.4	6.75	0.35	6.41	6.8	0.39	6.4	7	0.6	6.45	7	0.55
1993Q2	5.97	6.2	0.23	5.965	6.345	0.38	6	6.36	0.36	6.05	6.6	0.55	6.08	6.8	0.72
1993Q3	5.7	5.815	0.115	5.64	6	0.36	5.6	6.14	0.54	5.6	6.25	0.65	5.8	6.34	0.54
1993Q4	5.41	5.7	0.29	5.4	5.75	0.35	5.3	5.8	0.5	5.4	5.9	0.5	5.4	6	0.6
1994Q1	5.73	5.85	0.12	5.74	6	0.26	5.75	6.025	0.275	5.68	6.1	0.42	5.62	6.28	0.66
1994Q2	6.93	7.2	0.27	6.79	7.22	0.43	6.7	7.29	0.59	6.55	7.2	0.65	6.5	7.2	0.7
1994Q3	7.15	7.3	0.15	7.03	7.4	0.37	6.93	7.5	0.57	6.89	7.5	0.61	6.84	7.5	0.66
1994Q4	7.78	7.9	0.12	7.76	8.14	0.38	7.66	8.25	0.59	7.53	8.17	0.64	7.4	8.16	0.76
1995Q1	7.6	7.795	0.195	7.65	7.875	0.225	7.5	7.84	0.34	7.3	7.855	0.555	7.16	7.87	0.71
1995Q2	6.8	7.15	0.35	6.85	7.27	0.42	6.9	7.35	0.45	6.7	7.5	0.8	6.7	7.6	0.9
1995Q3	6.4	6.57	0.17	6.3	6.75	0.45	6.25	6.9	0.65	6.2	6.85	0.65	6.175	6.9	0.725
1995Q4	6	6.19	0.19	5.83	6.24	0.41	5.8	6.3	0.5	5.8	6.3	0.5	5.78	6.4	0.62
1996Q1	5.63	5.9	0.27	5.5	6	0.5	5.4	6.06	0.66	5.45	6.25	0.8	5.53	6.26	0.73
1996Q2	6.5	6.67	0.17	6.4	6.75	0.35	6.25	6.9	0.65	6.2	6.65	0.45	6	6.52	0.52
1996Q3	6.64	6.8	0.16	6.55	6.9	0.35	6.5	7	0.5	6.3	7	0.7	6.275	6.755	0.48
1996Q4	6.39	6.54	0.15	6.3	6.54	0.24	6.27	6.7	0.43	6.13	6.75	0.62	6.15	6.75	0.6
1997Q1	6.395	6.535	0.14	6.21	6.625	0.415	6.1	6.72	0.62	6	6.7	0.7	6	6.78	0.78
1997Q2	6.7	6.9	0.2	6.64	7	0.36	6.5	7	0.5	6.41	6.91	0.5	6.35	6.92	0.57
1997Q3	6.255	6.55	0.295	6.38	6.775	0.395	6.3	6.775	0.475	6.26	6.82	0.56	6.2	6.8	0.6
1997Q4	5.905	6.2	0.295	6	6.3	0.3	6.04	6.455	0.415	6	6.52	0.52	5.955	6.5	0.545
1998Q1	5.55	5.7	0.15	5.5	5.8	0.3	5.5	5.9	0.4	5.6	5.98	0.38	5.55	6.02	0.47
1998Q2	5.65	5.75	0.1	5.62	5.9	0.28	5.7	6	0.3	5.7	6.1	0.4	5.7	6.1	0.4
1998Q3	5.45	5.6	0.15	5.5	5.67	0.17	5.57	5.84	0.27	5.57	6	0.43	5.44	6.1	0.66
1998Q4	4.58	4.86	0.28	4.5	4.9	0.4	4.47	5	0.53	4.53	5.15	0.62	4.59	5.25	0.66
1999Q1	4.75	4.9	0.15	4.75	5	0.25	4.75	5.15	0.4	4.7	5.22	0.52	4.6	5.34	0.74
1999Q2	5.2	5.4	0.2	5.2	5.5	0.3	5.15	5.5	0.35	5.15	5.7	0.55	5.25	5.7	0.45
1999Q3	5.8	5.95	0.15	5.8	6	0.2	5.7	6.05	0.35	5.67	6.1	0.43	5.7	6.02	0.32
1999Q4	5.95	6.1	0.15	5.9	6.2	0.3	5.9	6.3	0.4	5.9	6.34	0.44	5.85	6.3	0.45
2000Q1	6.495	6.67	0.175	6.4	6.78	0.38	6.35	6.78	0.43	6.24	6.745	0.505	6.16	6.59	0.43
2000Q2	6.2	6.49	0.29	6.33	6.7	0.37	6.3	6.8	0.5	6.3	6.74	0.44	6.3	6.7	0.4
2000Q3	6	6.15	0.15	5.9	6.2	0.3	5.9	6.3	0.4	5.8	6.33	0.53	5.75	6.3	0.55
2000Q4	5.75	5.85	0.1	5.75	5.99	0.24	5.75	6.15	0.4	5.69	6.2	0.51	5.69	6.2	0.51
2001Q1	5.05	5.2	0.15	4.9	5.2	0.3	4.8	5.36	0.56	4.8	5.38	0.58	5	5.6	0.6
2001Q2	4.95	5.2	0.25	4.83	5.25	0.42	4.87	5.4	0.53	4.9	5.58	0.68	5	5.65	0.65
2001Q3	5.05	5.2	0.15	5	5.3	0.3	5.1	5.5	0.4	5	5.7	0.7	4.9	5.75	0.85
2001Q4	4.33	4.5	0.17	4.2	4.58	0.38	4.3	4.64	0.34	4.49	5	0.51	4.59	5.3	0.71
2002Q1	4.9	5.1	0.2	4.85	5.22	0.37	4.8	5.3	0.5	4.9	5.49	0.59	5.1	5.75	0.65
2002Q2	5.11	5.29	0.18	5.12	5.47	0.35	5.23	5.69	0.46	5.3	5.89	0.59	5.4	5.9	0.5
2002Q3	4.39	4.66	0.27	4.33	4.86	0.53	4.51	5.14	0.63	4.74	5.35	0.61	5.07	5.625	0.555
2002Q4	3.91	4.1	0.19	3.85	4.23	0.38	4.1	4.5	0.4	4.2	4.8	0.6	4.28	5.1	0.82
2003Q1	3.985	4.1	0.115	4.04	4.275	0.235	4.21	4.6	0.39	4.35	4.89	0.54	4.535	5.15	0.615
2003Q2	3.9	4	0.1	4	4.275	0.275	4.1	4.5	0.4	4.31	4.69	0.38	4.37	4.805	0.435
2003Q3	4.1	4.3	0.2	4.1	4.57	0.47	4.25	4.75	0.5	4.3	4.9	0.6	4.46	5.15	0.69
2003Q4	4.3	4.5	0.2	4.375	4.665	0.29	4.5	4.8	0.3	4.55	5	0.45	4.6	5.245	0.645
2004Q1	4.18	4.29	0.11	4.31	4.5	0.19	4.45	4.8	0.35	4.6	5.1	0.5	4.73	5.22	0.49
2004Q2	4.337	4.7	0.363	4.6	4.95	0.35	4.79	5.1	0.31	4.89	5.38	0.49	5.01	5.5	0.49
2004Q3	4.465	4.78	0.315	4.685	5	0.315	4.895	5.3	0.405	4.99	5.5	0.51	5.14	5.7045	0.5645
2004Q4	4.2	4.4	0.2	4.3415	4.77	0.4285	4.53	5.055	0.525	4.71	5.275	0.565	4.775	5.425	0.65
2005Q1	4.22	4.3	0.08	4.35	4.62	0.27	4.55	4.9	0.35	4.6	5.1	0.5	4.8	5.3	0.5
2005Q2	4.315	4.5	0.185	4.5	4.8	0.3	4.667	5	0.333	4.833	5.2	0.367	4.95	5.35	0.4
2005Q3	4.3	4.4	0.1	4.45	4.8	0.35	4.58	5	0.42	4.6	5.2	0.6	4.65	5.288	0.638
2005Q4	4.5	4.65	0.15	4.79	5	0.21	4.85	5.23	0.38	4.85	5.35	0.5	4.75	5.413	0.663
2006Q1	4.55	4.7	0.15	4.67	5	0.33	4.7	5.15	0.45	4.65	5.272	0.622	4.7	5.32	0.62
2006Q2	5.05	5.148	0.098	5.15	5.3	0.15	5.1	5.4	0.3	5.03	5.4	0.37	5.012	5.45	0.438
2006Q3	5.02	5.2367	0.2167	5.05	5.39	0.34	5.04	5.5018	0.4618	4.9966	5.5995	0.6028	4.9666	5.56	0.5934
2006Q4	4.7	4.8101	0.1101	4.74	5	0.26	4.65	5.1	0.45	4.63	5.1	0.47	4.6	5.15	0.55
2007Q1	4.75	4.83	0.08	4.7	4.95	0.25	4.7	5.1	0.4	4.68	5.15	0.47	4.71	5.2	0.49
2007Q2	4.64	4.75	0.11	4.65	4.85	0.2	4.67	4.98	0.31	4.681	5.0933	0.4123	4.7326	5.05	0.3174
2007Q3	4.84	4.98	0.14	4.87	5.05	0.18	4.85	5.15	0.3	4.8	5.2	0.4	4.8543	5.25	0.3957
2007Q4	4.4226	4.52	0.0974	4.35	4.7	0.35	4.3	4.8	0.5	4.41	4.95	0.54	4.5167	5	0.4833
2008Q1	3.6	3.75	0.15	3.5	3.88	0.38	3.575	4.0379	0.4629	3.7698	4.185	0.4152	4	4.3	0.3
2008Q2	3.6633	3.8067	0.1433	3.6	3.98	0.38	3.686	4.09	0.404	3.8	4.253	0.453	3.9795	4.5	0.5205
2008Q3	3.95	4.1	0.15	3.9	4.2	0.3	4	4.4	0.4	4.15	4.5	0.35	4.2667	4.75	0.4833
2008Q4	3.7	3.84	0.14	3.6	3.9	0.3	3.64	4	0.36	3.7359	4.1246	0.3887	3.8429	4.276	0.4331
2009Q1	2.5269	2.9	0.3731	2.6517	3.05	0.3983	2.79	3.325	0.535	2.955	3.5	0.545	3.0808	3.8393	0.7585
2009Q2	2.88	3.12	0.24	2.97	3.2001	0.2301	3	3.4333	0.4333	3.0586	3.6	0.5414	3.175	3.9291	0.7541
2009Q3	3.5682	3.7	0.1318	3.5827	3.9	0.3173	3.65	4.1	0.45	3.7	4.2	0.5	3.7518	4.322	0.5702
2009Q4	3.4	3.545	0.145	3.455	3.7	0.245	3.505	3.9	0.395	3.625	4.0272	0.4022	3.75	4.2	0.45
2010Q1	3.6	3.73	0.13	3.6651	3.9	0.2349	3.7567	4.1	0.3433	3.8733	4.31	0.4367	3.9133	4.5	0.5867
2010Q2	3.724	3.85	0.126	3.8	4.028	0.228	3.85	4.23	0.38	4	4.4	0.4	4.08	4.6033	0.5233
2010Q3	3	3.25	0.25	3.13	3.451	0.321	3.21	3.738	0.528	3.3	4	0.7	3.5613	4.3101	0.7487
2010Q4	2.5	2.6862	0.1862	2.45	2.7465	0.2965	2.49	3.002	0.512	2.7	3.42	0.72	2.9392	3.8	0.8608
2011Q1	3.3176	3.45	0.1324	3.3801	3.68	0.2999	3.45	3.8	0.35	3.5	4.018	0.518	3.61	4.2	0.59
2011Q2	3.39	3.5	0.11	3.52	3.7556	0.2356	3.6287	3.9989	0.3702	3.7377	4.1519	0.4142	3.9	4.3776	0.4776
2011Q3	2.7	3.1257	0.4257	2.8	3.4	0.6	2.93	3.6	0.67	3	3.84	0.84	3.2	4.1	0.9
2011Q4	2.15	2.3262	0.1762	2.25	2.5	0.25	2.31	2.7	0.39	2.4391	2.999	0.5599	2.54	3.2	0.66
2012Q1	1.96	2.1729	0.2129	2.041	2.2678	0.2267	2.1	2.4519	0.3519	2.2	2.5	0.3	2.4	2.75	0.35
2012Q2	2	2.19	0.19	2.15	2.356	0.206	2.25	2.5	0.25	2.3257	2.64	0.3143	2.41	2.8	0.39
2012Q3	1.5289	1.69	0.1611	1.6	1.88	0.28	1.7	2.1	0.4	1.8	2.34	0.54	1.88	2.55	0.67
2012Q4	1.7	1.8	0.1	1.7465	1.9203	0.1737	1.8	2.1048	0.3048	1.8541	2.3	0.4459	1.9725	2.5	0.5275
2013Q1	1.85	1.9916	0.1416	1.9236	2.1	0.1764	1.97	2.2557	0.2857	2.06	2.5	0.44	2.2	2.6873	0.4873
2013Q2	1.8	1.95	0.15	1.8656	2.13	0.2644	1.9991	2.25	0.2509	2.1555	2.45	0.2945	2.3	2.6	0.3
2013Q3	2.456	2.6	0.144	2.5	2.75	0.25	2.6	2.83	0.23	2.69	3	0.31	2.755	3.195	0.44
2013Q4	2.66	2.8	0.14	2.76	2.95	0.19	2.85	3.09	0.24	2.9	3.25	0.35	2.98	3.3448	0.3648
2014Q1	2.8	2.94	0.14	2.91	3.1	0.19	3.0342	3.25	0.2158	3.1	3.45	0.35	3.1736	3.573	0.3994
2014Q2	2.7	2.8117	0.1117	2.8	3.04	0.24	2.925	3.2455	0.3205	3	3.4414	0.4414	3.2	3.61	0.41
2014Q3	2.5644	2.7	0.1356	2.7	3	0.3	2.875	3.2	0.325	3.1	3.4	0.3	3.26	3.75	0.49
2014Q4	2.35	2.58	0.23	2.5	2.8317	0.3317	2.625	3.075	0.45	2.725	3.2613	0.5363	2.9	3.45	0.55
2015Q1	1.9	2.2	0.3	2.1	2.3793	0.2793	2.275	2.75	0.475	2.439	3	0.561	2.5625	3.19	0.6275
2015Q2	2.066	2.17	0.104	2.2	2.37	0.17	2.35	2.6	0.25	2.46	2.8	0.34	2.545	3.0667	0.5217
2015Q3	2.28	2.4569	0.1769	2.4226	2.65	0.2274	2.5552	2.8304	0.2752	2.6528	3	0.3472	2.75	3.2	0.45
2015Q4	2.2	2.32	0.12	2.3	2.6	0.3	2.43	2.82	0.39	2.5	2.95	0.45	2.59	3.15	0.56
2016Q1	2	2.28	0.28	2.16	2.5	0.34	2.2822	2.65	0.3678	2.4	2.8174	0.4174	2.46	2.96	0.5
2016Q2	1.85	1.985	0.135	1.98	2.2493	0.2693	2.05	2.3913	0.3413	2.2	2.6278	0.4278	2.26	2.7	0.44
2016Q3	1.5292	1.65	0.1208	1.65	1.92	0.27	1.75	2.2	0.45	1.9	2.4	0.5	2	2.5815	0.5815
2016Q4	1.75	1.8494	0.0994	1.8444	2	0.1556	1.91	2.1655	0.2555	2	2.3192	0.3192	2.05	2.5	0.45
2017Q1	2.35	2.51	0.16	2.5	2.6613	0.1613	2.5	2.8	0.3	2.6	3	0.4	2.7	3.1	0.4
2017Q2	2.35	2.5355	0.1855	2.46	2.7	0.24	2.6	2.8	0.2	2.7	3	0.3	2.75	3.2414	0.4914
2017Q3	2.3	2.427	0.127	2.4	2.6528	0.2528	2.5	2.9	0.4	2.51	3.0369	0.5269	2.595	3.2376	0.6426
2017Q4	2.37	2.49	0.12	2.4637	2.65	0.1863	2.6	2.8	0.2	2.65	3	0.35	2.5887	3.17	0.5813
2018Q1	2.7	2.7649	0.0649	2.8	2.9628	0.1628	2.9	3.13	0.23	2.92	3.3	0.38	3.01	3.4522	0.4422
2018Q2	2.9	3	0.1	3	3.2	0.2	3.1	3.3076	0.2076	3.2	3.45	0.25	3.26	3.6	0.34
2018Q3	2.9502	3.05	0.0999	3.05	3.21	0.16	3.12	3.35	0.23	3.24	3.48	0.24	3.25	3.6854	0.4354
2018Q4	3.1	3.2282	0.1282	3.1275	3.3554	0.2279	3.2133	3.525	0.3117	3.3	3.71	0.41	3.3932	3.8447	0.4515
2019Q1	2.7	2.92	0.22	2.725	3.0351	0.3101	2.7742	3.13	0.3558	2.8	3.2016	0.4016	2.86	3.3027	0.4427
2019Q2	2.537	2.6455	0.1085	2.6	2.6801	0.0801	2.6	2.77	0.17	2.62	2.9	0.28	2.7	2.994	0.294
2019Q3	1.93	2.2135	0.2835	2	2.3	0.3	1.95	2.3	0.35	1.95	2.44	0.49	2	2.5	0.5
2019Q4	1.71	1.8	0.09	1.7326	1.85	0.1174	1.7507	2	0.2493	1.7933	2.1	0.3067	1.83	2.2	0.37
2020Q1	1.685	1.8148	0.1298	1.7609	1.914	0.1531	1.79	2.0073	0.2173	1.8348	2.1	0.2652	1.9	2.2219	0.3219
2020Q2	0.645	0.7	0.055	0.695	0.8362	0.1412	0.7011	0.9144	0.2133	0.7684	1.1825	0.414	0.85	1.3268	0.4768
2020Q3	0.6	0.73	0.13	0.65	0.8746	0.2246	0.7	1.1	0.4	0.72	1.2	0.48	0.75	1.35	0.6
2020Q4	0.7325	0.8621	0.1296	0.745	0.95	0.205	0.8	1.02	0.22	0.86	1.16	0.3	0.89	1.3	0.41
2021Q1	1.005	1.1524	0.1474	1.1	1.295	0.195	1.2	1.3867	0.1867	1.28	1.5	0.22	1.3	1.5558	0.2558
2021Q2	1.6	1.77	0.17	1.6984	1.9	0.2016	1.752	2	0.248	1.8	2.1	0.3	1.85	2.2	0.35
2021Q3	1.3239	1.5	0.1761	1.45	1.7	0.25	1.5898	1.8	0.2102	1.665	2	0.335	1.725	2.11	0.385
2021Q4	1.55	1.65	0.1	1.6115	1.8	0.1885	1.7	2	0.3	1.7972	2.16	0.3628	1.85	2.2806	0.4306

## Sheet: CPI
Measures of Cross-Sectional Dispersion for Quarterly Forecasts for CONSUMER PRICE INDEX (CPI)
Units: Percent Change, Annual Rate, SA, 1982-84=100
Dispersion Measure D1 = 75th Percentile Minus 25th Percentile of the Forecasts for Levels
P25 = 25th Percentile of the Forecasts for Levels
P75 = 75th Percentile of the Forecasts for Levels
At Each Survey Date T, the Quarterly Horizons Are T, T+1, T+2, T+3, and T+4
Survey_Date(T)	CPI_P25_D1(T)	CPI_P75_D1(T)	CPI_D1(T)	CPI_P25_D1(T+1)	CPI_P75_D1(T+1)	CPI_D1(T+1)	CPI_P25_D1(T+2)	CPI_P75_D1(T+2)	CPI_D1(T+2)	CPI_P25_D1(T+3)	CPI_P75_D1(T+3)	CPI_D1(T+3)	CPI_P25_D1(T+4)	CPI_P75_D1(T+4)	CPI_D1(T+4)
1968Q4	#N/A	#N/A	#N/A	#N/A	#N/A	#N/A	#N/A	#N/A	#N/A	#N/A	#N/A	#N/A	#N/A	#N/A	#N/A
1969Q1	#N/A	#N/A	#N/A	#N/A	#N/A	#N/A	#N/A	#N/A	#N/A	#N/A	#N/A	#N/A	#N/A	#N/A	#N/A
1969Q2	#N/A	#N/A	#N/A	#N/A	#N/A	#N/A	#N/A	#N/A	#N/A	#N/A	#N/A	#N/A	#N/A	#N/A	#N/A
1969Q3	#N/A	#N/A	#N/A	#N/A	#N/A	#N/A	#N/A	#N/A	#N/A	#N/A	#N/A	#N/A	#N/A	#N/A	#N/A
1969Q4	#N/A	#N/A	#N/A	#N/A	#N/A	#N/A	#N/A	#N/A	#N/A	#N/A	#N/A	#N/A	#N/A	#N/A	#N/A
1970Q1	#N/A	#N/A	#N/A	#N/A	#N/A	#N/A	#N/A	#N/A	#N/A	#N/A	#N/A	#N/A	#N/A	#N/A	#N/A
1970Q2	#N/A	#N/A	#N/A	#N/A	#N/A	#N/A	#N/A	#N/A	#N/A	#N/A	#N/A	#N/A	#N/A	#N/A	#N/A
1970Q3	#N/A	#N/A	#N/A	#N/A	#N/A	#N/A	#N/A	#N/A	#N/A	#N/A	#N/A	#N/A	#N/A	#N/A	#N/A
1970Q4	#N/A	#N/A	#N/A	#N/A	#N/A	#N/A	#N/A	#N/A	#N/A	#N/A	#N/A	#N/A	#N/A	#N/A	#N/A
1971Q1	#N/A	#N/A	#N/A	#N/A	#N/A	#N/A	#N/A	#N/A	#N/A	#N/A	#N/A	#N/A	#N/A	#N/A	#N/A
1971Q2	#N/A	#N/A	#N/A	#N/A	#N/A	#N/A	#N/A	#N/A	#N/A	#N/A	#N/A	#N/A	#N/A	#N/A	#N/A
1971Q3	#N/A	#N/A	#N/A	#N/A	#N/A	#N/A	#N/A	#N/A	#N/A	#N/A	#N/A	#N/A	#N/A	#N/A	#N/A
1971Q4	#N/A	#N/A	#N/A	#N/A	#N/A	#N/A	#N/A	#N/A	#N/A	#N/A	#N/A	#N/A	#N/A	#N/A	#N/A
1972Q1	#N/A	#N/A	#N/A	#N/A	#N/A	#N/A	#N/A	#N/A	#N/A	#N/A	#N/A	#N/A	#N/A	#N/A	#N/A
1972Q2	#N/A	#N/A	#N/A	#N/A	#N/A	#N/A	#N/A	#N/A	#N/A	#N/A	#N/A	#N/A	#N/A	#N/A	#N/A
1972Q3	#N/A	#N/A	#N/A	#N/A	#N/A	#N/A	#N/A	#N/A	#N/A	#N/A	#N/A	#N/A	#N/A	#N/A	#N/A
1972Q4	#N/A	#N/A	#N/A	#N/A	#N/A	#N/A	#N/A	#N/A	#N/A	#N/A	#N/A	#N/A	#N/A	#N/A	#N/A
1973Q1	#N/A	#N/A	#N/A	#N/A	#N/A	#N/A	#N/A	#N/A	#N/A	#N/A	#N/A	#N/A	#N/A	#N/A	#N/A
1973Q2	#N/A	#N/A	#N/A	#N/A	#N/A	#N/A	#N/A	#N/A	#N/A	#N/A	#N/A	#N/A	#N/A	#N/A	#N/A
1973Q3	#N/A	#N/A	#N/A	#N/A	#N/A	#N/A	#N/A	#N/A	#N/A	#N/A	#N/A	#N/A	#N/A	#N/A	#N/A
1973Q4	#N/A	#N/A	#N/A	#N/A	#N/A	#N/A	#N/A	#N/A	#N/A	#N/A	#N/A	#N/A	#N/A	#N/A	#N/A
1974Q1	#N/A	#N/A	#N/A	#N/A	#N/A	#N/A	#N/A	#N/A	#N/A	#N/A	#N/A	#N/A	#N/A	#N/A	#N/A
1974Q2	#N/A	#N/A	#N/A	#N/A	#N/A	#N/A	#N/A	#N/A	#N/A	#N/A	#N/A	#N/A	#N/A	#N/A	#N/A
1974Q3	#N/A	#N/A	#N/A	#N/A	#N/A	#N/A	#N/A	#N/A	#N/A	#N/A	#N/A	#N/A	#N/A	#N/A	#N/A
1974Q4	#N/A	#N/A	#N/A	#N/A	#N/A	#N/A	#N/A	#N/A	#N/A	#N/A	#N/A	#N/A	#N/A	#N/A	#N/A
1975Q1	#N/A	#N/A	#N/A	#N/A	#N/A	#N/A	#N/A	#N/A	#N/A	#N/A	#N/A	#N/A	#N/A	#N/A	#N/A
1975Q2	#N/A	#N/A	#N/A	#N/A	#N/A	#N/A	#N/A	#N/A	#N/A	#N/A	#N/A	#N/A	#N/A	#N/A	#N/A
1975Q3	#N/A	#N/A	#N/A	#N/A	#N/A	#N/A	#N/A	#N/A	#N/A	#N/A	#N/A	#N/A	#N/A	#N/A	#N/A
1975Q4	#N/A	#N/A	#N/A	#N/A	#N/A	#N/A	#N/A	#N/A	#N/A	#N/A	#N/A	#N/A	#N/A	#N/A	#N/A
1976Q1	#N/A	#N/A	#N/A	#N/A	#N/A	#N/A	#N/A	#N/A	#N/A	#N/A	#N/A	#N/A	#N/A	#N/A	#N/A
1976Q2	#N/A	#N/A	#N/A	#N/A	#N/A	#N/A	#N/A	#N/A	#N/A	#N/A	#N/A	#N/A	#N/A	#N/A	#N/A
1976Q3	#N/A	#N/A	#N/A	#N/A	#N/A	#N/A	#N/A	#N/A	#N/A	#N/A	#N/A	#N/A	#N/A	#N/A	#N/A
1976Q4	#N/A	#N/A	#N/A	#N/A	#N/A	#N/A	#N/A	#N/A	#N/A	#N/A	#N/A	#N/A	#N/A	#N/A	#N/A
1977Q1	#N/A	#N/A	#N/A	#N/A	#N/A	#N/A	#N/A	#N/A	#N/A	#N/A	#N/A	#N/A	#N/A	#N/A	#N/A
1977Q2	#N/A	#N/A	#N/A	#N/A	#N/A	#N/A	#N/A	#N/A	#N/A	#N/A	#N/A	#N/A	#N/A	#N/A	#N/A
1977Q3	#N/A	#N/A	#N/A	#N/A	#N/A	#N/A	#N/A	#N/A	#N/A	#N/A	#N/A	#N/A	#N/A	#N/A	#N/A
1977Q4	#N/A	#N/A	#N/A	#N/A	#N/A	#N/A	#N/A	#N/A	#N/A	#N/A	#N/A	#N/A	#N/A	#N/A	#N/A
1978Q1	#N/A	#N/A	#N/A	#N/A	#N/A	#N/A	#N/A	#N/A	#N/A	#N/A	#N/A	#N/A	#N/A	#N/A	#N/A
1978Q2	#N/A	#N/A	#N/A	#N/A	#N/A	#N/A	#N/A	#N/A	#N/A	#N/A	#N/A	#N/A	#N/A	#N/A	#N/A
1978Q3	#N/A	#N/A	#N/A	#N/A	#N/A	#N/A	#N/A	#N/A	#N/A	#N/A	#N/A	#N/A	#N/A	#N/A	#N/A
1978Q4	#N/A	#N/A	#N/A	#N/A	#N/A	#N/A	#N/A	#N/A	#N/A	#N/A	#N/A	#N/A	#N/A	#N/A	#N/A
1979Q1	#N/A	#N/A	#N/A	#N/A	#N/A	#N/A	#N/A	#N/A	#N/A	#N/A	#N/A	#N/A	#N/A	#N/A	#N/A
1979Q2	#N/A	#N/A	#N/A	#N/A	#N/A	#N/A	#N/A	#N/A	#N/A	#N/A	#N/A	#N/A	#N/A	#N/A	#N/A
1979Q3	#N/A	#N/A	#N/A	#N/A	#N/A	#N/A	#N/A	#N/A	#N/A	#N/A	#N/A	#N/A	#N/A	#N/A	#N/A
1979Q4	#N/A	#N/A	#N/A	#N/A	#N/A	#N/A	#N/A	#N/A	#N/A	#N/A	#N/A	#N/A	#N/A	#N/A	#N/A
1980Q1	#N/A	#N/A	#N/A	#N/A	#N/A	#N/A	#N/A	#N/A	#N/A	#N/A	#N/A	#N/A	#N/A	#N/A	#N/A
1980Q2	#N/A	#N/A	#N/A	#N/A	#N/A	#N/A	#N/A	#N/A	#N/A	#N/A	#N/A	#N/A	#N/A	#N/A	#N/A
1980Q3	#N/A	#N/A	#N/A	#N/A	#N/A	#N/A	#N/A	#N/A	#N/A	#N/A	#N/A	#N/A	#N/A	#N/A	#N/A
1980Q4	#N/A	#N/A	#N/A	#N/A	#N/A	#N/A	#N/A	#N/A	#N/A	#N/A	#N/A	#N/A	#N/A	#N/A	#N/A
1981Q1	#N/A	#N/A	#N/A	#N/A	#N/A	#N/A	#N/A	#N/A	#N/A	#N/A	#N/A	#N/A	#N/A	#N/A	#N/A
1981Q2	#N/A	#N/A	#N/A	#N/A	#N/A	#N/A	#N/A	#N/A	#N/A	#N/A	#N/A	#N/A	#N/A	#N/A	#N/A
1981Q3	8.7	10.2	1.5	7.35	8.45	1.1	7.4	8.15	0.75	7.15	8.05	0.9	7	8.35	1.35
1981Q4	8.6	10.7	2.1	7	9.5	2.5	6.8	8.9	2.1	7	8.7	1.7	7.2	8.9	1.7
1982Q1	4.85	6.2	1.35	5.75	6.85	1.1	6.2	7.5	1.3	5.95	7.15	1.2	6	7.45	1.45
1982Q2	2.4	4.4	2	5	6.5	1.5	5.5	6.6	1.1	5.05	7	1.95	5.1	6.9	1.8
1982Q3	6.2	8.8	2.6	4.6	6.5	1.9	5.4	6.6	1.2	5.5	6.5	1	5.45	6.6	1.15
1982Q4	3	4.8	1.8	4.5	5.7	1.2	5	6	1	5	6	1	5	6.1	1.1
1983Q1	1.5	3.8	2.3	3	5	2	4	5.2	1.2	3.9	5.4	1.5	3.2	5.5	2.3
1983Q2	2.9	5	2.1	3.5	5.2	1.7	4	5.5	1.5	4.3	5.1	0.8	4.2	5.4	1.2
1983Q3	3.7	4.7	1	4.05	5.1	1.05	4	5.1	1.1	3.9	5.5	1.6	4	5.6	1.6
1983Q4	4.3	5.3	1	4.1	5.4	1.3	4.1	5.4	1.3	4.5	5.5	1	4.5	5.8	1.3
1984Q1	4	4.5	0.5	3.8	5	1.2	4.3	5.4	1.1	4.1	5.7	1.6	4.25	5.65	1.4
1984Q2	3.5	5	1.5	4.3	5.3	1	4.6	5.9	1.3	4.75	6.2	1.45	4.75	6.25	1.5
1984Q3	3.4	4	0.6	4.2	4.8	0.6	4.5	5.3	0.8	4.7	6	1.3	4.6	6	1.4
1984Q4	3.5	4.3	0.8	3.9	4.7	0.8	3.9	4.85	0.95	4	5.1	1.1	4	5.5	1.5
1985Q1	3	3.5	0.5	3.2	4	0.8	3.35	4.25	0.9	3.8	4.5	0.7	4	5	1
1985Q2	3.7	4.3	0.6	3.5	4.3	0.8	3.8	4.6	0.8	4	5	1	4.05	5.3	1.25
1985Q3	3	4	1	3.6	4.4	0.8	3.9	4.8	0.9	3.9	5.2	1.3	4.05	5.3	1.25
1985Q4	2.8	3.5	0.7	3.2	3.9	0.7	3.3	4.2	0.9	3.3	4.4	1.1	3.7	4.8	1.1
1986Q1	3	3.75	0.75	2.6	3.55	0.95	3.3	3.9	0.6	3.3	4.35	1.05	3.5	4.65	1.15
1986Q2	-1.85	1.7	3.55	2	3.3	1.3	2.8	4	1.2	3.3	4.3	1	3.4	4.3	0.9
1986Q3	2.5	3.3	0.8	3	4	1	3.3	4	0.7	3.3	4	0.7	3.4	4.2	0.8
1986Q4	2.55	3.4	0.85	3	3.6	0.6	3.2	3.95	0.75	3.4	4.2	0.8	3.45	4.45	1
1987Q1	3.1	3.7	0.6	3.3	4	0.7	3.5	4.5	1	3.5	4.4	0.9	3.5	4.2	0.7
1987Q2	3.6	5.05	1.45	3.45	4.65	1.2	3.55	4.65	1.1	3.5	4.7	1.2	3.7	4.65	0.95
1987Q3	3.5	4.9	1.4	4	5	1	4.3	4.8	0.5	4.2	4.8	0.6	4.25	5.15	0.9
1987Q4	3.8	4.5	0.7	3.9	4.5	0.6	3.8	4.5	0.7	4	4.6	0.6	4.05	4.95	0.9
1988Q1	3.5	4.5	1	3.6	4.3	0.7	3.9	4.8	0.9	4	4.7	0.7	4.2	5.1	0.9
1988Q2	3.8	4.7	0.9	4	4.8	0.8	4.2	5	0.8	4.4	5.2	0.8	4.4	5	0.6
1988Q3	4.4	5	0.6	4.5	5	0.5	4.8	5.4	0.6	4.9	5.3	0.4	4.5	5.2	0.7
1988Q4	4.8	5.2	0.4	4.7	5.3	0.6	4.6	5.3	0.7	4.3	5.6	1.3	4.6	5.8	1.2
1989Q1	4.4	4.95	0.55	4.45	5.2	0.75	4.6	5.6	1	4.5	5.45	0.95	4.4	5.5	1.1
1989Q2	5.5	6.3	0.8	4.8	5.5	0.7	4.6	5.4	0.8	4.5	5.5	1	4.5	5.4	0.9
1989Q3	4	4.9	0.9	3.9	5	1.1	4	4.9	0.9	4	5	1	4.1	5	0.9
1989Q4	3.55	4.55	1	3.95	4.45	0.5	3.9	4.5	0.6	3.9	4.6	0.7	3.85	4.7	0.85
1990Q1	4.2	5.3	1.1	4	4.5	0.5	4.1	4.5	0.4	4.2	4.5	0.3	4.3	4.6	0.3
1990Q2	3.2	4.7	1.5	3.16	4.5	1.34	3.4	4.5	1.1	3.7	5	1.3	3.9	5	1.1
1990Q3	4.5	6.6	2.1	3.7	5.27	1.57	3.9	5	1.1	3.04	4.4	1.36	3.36	4.55	1.19
1990Q4	6.8	8.5	1.7	4.5	6.1	1.6	3.6	5.1	1.5	3.5	4.7	1.2	3.8	4.7	0.9
1991Q1	2.8	4.5	1.7	2.4	4	1.6	3	4	1	3.3	4.2	0.9	3.23	4.2	0.97
1991Q2	2.5	3.5	1	3.35	4	0.65	3.45	4.2	0.75	3.6	4.2	0.6	3.5	4.2	0.7
1991Q3	3	3.5	0.5	3.4	3.9	0.5	3.7	4.1	0.4	3.5	4.2	0.7	3.55	4.3	0.75
1991Q4	3	3.5	0.5	3.2	3.9	0.7	3.2	3.8	0.6	3.3	4	0.7	3.4	4	0.6
1992Q1	2.7	3.3	0.6	2.8	3.5	0.7	3.1	3.5	0.4	3.2	3.9	0.7	3.3	3.8	0.5
1992Q2	2.6	3.5	0.9	2.9	3.6	0.7	3.2	3.8	0.6	3.4	4	0.6	3.42	4.15	0.73
1992Q3	2.7	3.3	0.6	3	3.7	0.7	3	3.7	0.7	3	3.7	0.7	3	3.8	0.8
1992Q4	2.8	3.3	0.5	2.8	3.3	0.5	2.8	3.6	0.8	2.8	3.8	1	3	3.8	0.8
1993Q1	2.75	3.15	0.4	2.8	3.3	0.5	3	3.6	0.6	3	3.75	0.75	3.1	3.8	0.7
1993Q2	3.1	3.6	0.5	2.9	3.5	0.6	3	3.6	0.6	3.2	4.1	0.9	3.15	3.9	0.75
1993Q3	2.1	3.1	1	3	3.6	0.6	3	3.5	0.5	2.95	3.5	0.55	3	3.6	0.6
1993Q4	2.8	3.2	0.4	2.8	3.5	0.7	2.8	3.2	0.4	2.8	3.4	0.6	2.9	3.4	0.5
1994Q1	2.65	3.35	0.7	2.8	3.3	0.5	2.85	3.5	0.65	3	3.5	0.5	3	3.6	0.6
1994Q2	2.7	3.6	0.9	2.9	3.4	0.5	3.1	3.6	0.5	3	3.8	0.8	3	3.7	0.7
1994Q3	3.2	3.5	0.3	3.1	3.7	0.6	3	3.7	0.7	3.2	3.6	0.4	3.025	3.7	0.675
1994Q4	2.85	3.6	0.75	3.15	3.8	0.65	3.15	3.7	0.55	3.15	3.75	0.6	3.2	3.85	0.65
1995Q1	3	3.4	0.4	3	3.5	0.5	3.2	3.6	0.4	3.3	3.85	0.55	3.3	3.8	0.5
1995Q2	3.2	3.5	0.3	3.1	3.6	0.5	3.1	3.7	0.6	3.2	3.8	0.6	3.2	3.9	0.7
1995Q3	2.6	3.2	0.6	3	3.4	0.4	3	3.5	0.5	3	3.6	0.6	3	3.61	0.61
1995Q4	2.3	2.8	0.5	2.6	3.2	0.6	2.6	3.2	0.6	2.7	3.2	0.5	2.8	3.4	0.6
1996Q1	2.5	3	0.5	2.4	3	0.6	2.5	3	0.5	2.5	3	0.5	2.6	3.1	0.5
1996Q2	3.2	3.9	0.7	2.6	3.1	0.5	2.5	3	0.5	2.7	3.2	0.5	2.7	3.3	0.6
1996Q3	2.5	3.1	0.6	2.6	3.2	0.6	2.9	3.5	0.6	2.85	3.5	0.65	2.8	3.4	0.6
1996Q4	2.7	3.2	0.5	2.8	3.3	0.5	2.7	3.4	0.7	2.8	3.4	0.6	2.8	3.4	0.6
1997Q1	2.8	3.3	0.5	2.7	3.3	0.6	2.7	3.4	0.7	2.7	3.5	0.8	2.8	3.5	0.7
1997Q2	2	2.8	0.8	2.6	3	0.4	2.8	3.3	0.5	2.8	3.35	0.55	2.7	3.4	0.7
1997Q3	2	2.5	0.5	2.6	3.1	0.5	2.5	3	0.5	2.5	3.2	0.7	2.6	3.2	0.6
1997Q4	2.3	2.6	0.3	2.3	2.8	0.5	2.3	3	0.7	2.4	3	0.6	2.5	3	0.5
1998Q1	1.5	2.2	0.7	1.7	2.4	0.7	2	2.5	0.5	2.2	2.7	0.5	2.2	2.8	0.6
1998Q2	1.4	2	0.6	2	2.6	0.6	2.05	2.65	0.6	2.1	2.7	0.6	2.1	2.9	0.8
1998Q3	1.7	2.4	0.7	1.9	2.6	0.7	2.2	2.7	0.5	2.3	2.8	0.5	2.3	2.9	0.6
1998Q4	1.6	2.2	0.6	1.86	2.4	0.54	2.15	2.5	0.35	2.15	2.5	0.35	2.1	2.7	0.6
1999Q1	1.8	2.05	0.25	1.885	2.25	0.365	1.965	2.3	0.335	2.05	2.5	0.45	2.1	2.6	0.5
1999Q2	2	3.2	1.2	1.8	2.5	0.7	1.9	2.5	0.6	1.9	2.5	0.6	2	2.6	0.6
1999Q3	2	2.55	0.55	2.1	2.55	0.45	2.15	2.5	0.35	2.2	2.6	0.4	2.25	2.7	0.45
1999Q4	2.4	2.8	0.4	2.1	2.7	0.6	2.2	2.725	0.525	2.15	2.7	0.55	2.1	2.85	0.75
2000Q1	2.3	3	0.7	2.2	2.8	0.6	2.2	2.8	0.6	2.1	2.8	0.7	2.1	2.8	0.7
2000Q2	2.825	3.9	1.075	2.15	3	0.85	2.35	3	0.65	2.5	2.95	0.45	2.5	3	0.5
2000Q3	2.6	3.2	0.6	2.45	2.95	0.5	2.6	3	0.4	2.35	2.9	0.55	2.3	3	0.7
2000Q4	2.8	3.4	0.6	2.4	3.2	0.8	2.5	2.9	0.4	2.4	2.9	0.5	2.3	2.9	0.6
2001Q1	2.4	2.8	0.4	2.4	2.7	0.3	2.1	2.8	0.7	2.1	2.8	0.7	2.1	2.95	0.85
2001Q2	2.5	3.6	1.1	2	2.8	0.8	2	2.8	0.8	2.2	3	0.8	2.1	2.8	0.7
2001Q3	1.7	2.7	1	2.1	2.8	0.7	2.2	2.8	0.6	2.2	2.9	0.7	2.3	2.9	0.6
2001Q4	1.1	2	0.9	1.7	2.4	0.7	1.8	2.4	0.6	1.9	2.5	0.6	2.2	2.7	0.5
2002Q1	1	1.7	0.7	1.7	2.25	0.55	1.9	2.4	0.5	2.1	2.5	0.4	2.2	2.6	0.4
2002Q2	2.2	3.7	1.5	2	2.5	0.5	2	2.5	0.5	2.2	2.678	0.478	2.2	2.7	0.5
2002Q3	1.7	2.5	0.8	1.9	2.4	0.5	1.9	2.8	0.9	2.1	2.5	0.4	2	2.7	0.7
2002Q4	2	2.5	0.5	2	2.45	0.45	1.9	2.55	0.65	1.9	2.6	0.7	2	2.45	0.45
2003Q1	2.2	2.8	0.6	2	2.3	0.3	1.6	2.2	0.6	1.9	2.4	0.5	2	2.5	0.5
2003Q2	1.15	2.35	1.2	1.35	2.2	0.85	1.8	2.35	0.55	2	2.35	0.35	2	2.5	0.5
2003Q3	1.2	2	0.8	1	2.3	1.3	1.2	2.45	1.25	1.3	2.3	1	1.75	2.5	0.75
2003Q4	1.8	2.4	0.6	1.3	2.3	1	1.5	2.2	0.7	1.7	2.5	0.8	1.7	2.5	0.8
2004Q1	1.3	2	0.7	1.2	2	0.8	1.1	1.9	0.8	1.3	2.2	0.9	1.4	2.3	0.9
2004Q2	2	3.3	1.3	1.7	2.59	0.89	1.6	2.7	1.1	1.7	2.55	0.85	1.863	2.413	0.55
2004Q3	2.735	3.505	0.77	1.8	3.1	1.3	1.9	2.9	1	2	2.7	0.7	2	2.6	0.6
2004Q4	2.205	3.0755	0.8705	2	2.679	0.679	1.95	2.6355	0.6855	1.841	2.6385	0.7975	2.074	2.7635	0.6895
2005Q1	1.773	2.9	1.127	2.009	2.65	0.641	1.9	2.5385	0.6385	2.0895	2.65	0.5605	2.03	2.6	0.57
2005Q2	2.8	4.2	1.4	1.95	2.6	0.65	2.237	2.706	0.469	2.1	2.7	0.6	2.3	2.695	0.395
2005Q3	2.365	3.213	0.848	2.146	2.9	0.754	2.2	2.8	0.6	2.2	2.746	0.546	2.158	2.72	0.562
2005Q4	3.1	4.487	1.387	1.8	3	1.2	2	2.7	0.7	2.118	2.78	0.662	2.028	2.8	0.772
2006Q1	1.5	3.2	1.7	2	2.988	0.988	2.1	2.8	0.7	2	2.7	0.7	1.977	2.6	0.623
2006Q2	2.6	3.93	1.33	2.3	3	0.7	2.1997	2.8	0.6003	2	2.6	0.6	2	2.5705	0.5705
2006Q3	3	3.97	0.97	2.3	3.47	1.17	2.4	3.1	0.7	2.2	3	0.8	2.2	2.8	0.6
2006Q4	-1	2.4	3.4	2.4	3.1335	0.7335	2.4	3.0846	0.6846	2.3	2.8	0.5	2	2.7	0.7
2007Q1	1.9	2.9	1	2.39	2.8996	0.5096	2.28	2.9	0.62	2	2.7	0.7	2.13	2.58	0.45
2007Q2	3.2	5.0267	1.8267	2.061	2.8003	0.7392	1.7689	2.7	0.9311	2.2	2.9	0.7	2.2	2.8	0.6
2007Q3	2	2.8646	0.8646	1.4	2.5	1.1	1.93	2.7	0.77	2	2.6936	0.6936	2	2.7	0.7
2007Q4	2.4495	3.75	1.3005	2.4	3.5	1.1	2.0146	2.8	0.7854	1.9455	2.6786	0.7331	1.8819	2.7	0.8181
2008Q1	2.55	3.7	1.15	1.675	3.0332	1.3582	1.8	2.9331	1.1331	1.6272	2.8177	1.1905	2.0169	2.9608	0.9439
2008Q2	2.8	4	1.2	2.6	3.8	1.2	1.86	3	1.14	2.2	3	0.8	2	2.8	0.8
2008Q3	4.2	6.034	1.834	2	3.3	1.3	2.1209	3.4	1.2791	1.7032	3	1.2968	2	3	1
2008Q4	-4.3443	-0.6	3.7443	0	1.8999	1.8999	1.3	2.3	1	1.7717	2.8	1.0283	1.859	2.8	0.941
2009Q1	-3.5	-1.6274	1.8726	0.49	1.8	1.31	1.1	2.203	1.103	1	2.1	1.1	1.5	2.5	1
2009Q2	-0.0825	1.6	1.6825	1.1	2.4	1.3	1.0677	2	0.9323	1.2869	2.2468	0.9599	1.5	2.3424	0.8424
2009Q3	1.6	3.2	1.6	1	2.3	1.3	1.4	2	0.6	1.3	2.1	0.8	1.4	2.8	1.4
2009Q4	1.8	2.6	0.8	1	2.1	1.1	1	2	1	1.5	2.4	0.9	1.59	2.2073	0.6173
2010Q1	1.4364	2.5919	1.1555	0.6	2	1.4	1.4	2.2	0.8	1.5	2.4	0.9	1.785	2.4326	0.6476
2010Q2	0.6239	1.8725	1.2485	1.4519	2.5	1.0481	1.5	2.164	0.664	1.6	2.3184	0.7184	1.6	2.2582	0.6582
2010Q3	0.8	1.7	0.9	1.2	2	0.8	1.2	1.932	0.732	1.1363	1.9	0.7637	1.4	2.2386	0.8386
2010Q4	1.5258	2.28	0.7542	1.2	2.1	0.9	0.9472	1.9	0.9528	1.1	2.1193	1.0193	1.2012	2.28	1.0788
2011Q1	1.7	2.9991	1.2991	0.54	1.8739	1.3339	1.1446	2.1	0.9554	1.2066	2.1	0.8934	1.4	2.6	1.2
2011Q2	2.59	4.3	1.71	1.5092	2.7	1.1908	1.3703	2.51	1.1397	1.7	2.6	0.9	1.58	2.5	0.92
2011Q3	0.6542	2.555	1.9008	1.4425	2.5	1.0575	1.6568	2.6	0.9432	1.6	2.7463	1.1463	1.6548	2.6	0.9452
2011Q4	1.6	2.5484	0.9484	1.6587	2.6314	0.9727	1.25	2.8	1.55	1.6	2.6996	1.0996	1.6	2.6	1
2012Q1	1.5	2.4	0.9	1.6	2.5005	0.9005	1.8698	2.6	0.7302	1.8	2.4	0.6	1.8726	2.59	0.7174
2012Q2	1.8	2.7	0.9	1.87	2.4	0.53	1.8	2.4	0.6	1.91	2.4	0.49	1.5844	2.47	0.8856
2012Q3	1.3	2.1232	0.8232	1.7	2.3	0.6	1.7348	2.5	0.7652	1.6	2.4	0.8	1.9191	2.45	0.5309
2012Q4	1.985	2.8	0.815	1.7	2.4407	0.7407	1.679	2.5	0.821	1.915	2.5074	0.5924	1.965	2.5246	0.5596
2013Q1	1.2	2.3	1.1	1.8	2.3	0.5	1.8982	2.4	0.5018	1.902	2.4	0.498	1.9	2.4	0.5
2013Q2	0.5	1.9	1.4	1.8	2.3	0.5	1.8	2.3	0.5	1.9	2.3757	0.4757	1.8205	2.4	0.5795
2013Q3	1.5	3	1.5	1.4	2.1	0.7	1.5	2.2	0.7	1.5141	2.2	0.6859	1.7784	2.3447	0.5663
2013Q4	1.2	1.9597	0.7597	1.495	2.1	0.605	1.642	2.1	0.458	1.87	2.35	0.48	1.8	2.4989	0.6989
2014Q1	1.3832	2	0.6168	1.4155	1.99	0.5745	1.6954	2.3035	0.6081	1.6798	2.2	0.5202	1.6708	2.2589	0.5881
2014Q2	1.7004	2.25	0.5496	1.7	2.1102	0.4102	1.6798	2.101	0.4212	1.77	2.2	0.43	1.8	2.3	0.5
2014Q3	1.8565	2.5	0.6435	1.8002	2.3	0.4998	1.9397	2.3122	0.3725	1.9	2.4995	0.5995	1.8261	2.45	0.6239
2014Q4	0.0543	1.575	1.5207	1.2715	2.1368	0.8653	1.7	2.3948	0.6948	1.7415	2.2214	0.4799	1.6525	2.2	0.5475
2015Q1	-2.8	0.12	2.92	1.2	1.9642	0.7642	1.6	2.38	0.78	1.8	2.3038	0.5038	1.7	2.4	0.7
2015Q2	1.038	2.5	1.462	1.6	2.5	0.9	1.6	2.23	0.63	1.5027	2.1	0.5973	1.9	2.3894	0.4894
2015Q3	1.555	2.2762	0.7212	1.0376	2.15	1.1124	1.3952	2.25	0.8548	1.8138	2.36	0.5462	1.9	2.4	0.5
2015Q4	0.3	1.7	1.4	1.5	2.1	0.6	1.8	2.3	0.5	1.9	2.4	0.5	1.9665	2.5	0.5335
2016Q1	-0.4	1.3783	1.7783	1.1505	2.24	1.0895	1.6	2.4	0.8	1.7256	2.4274	0.7018	1.8	2.3846	0.5846
2016Q2	1.3	2.6	1.3	1.5	2.4	0.9	1.8	2.4515	0.6515	1.8	2.2	0.4	1.8834	2.3	0.4166
2016Q3	1.5777	2.2	0.6223	1.9118	2.6	0.6882	1.9	2.5	0.6	1.882	2.5	0.618	1.8985	2.5	0.6015
2016Q4	1.9313	2.8	0.8687	1.8327	2.3108	0.4781	1.9	2.3198	0.4198	2.1	2.4294	0.3294	2.08	2.4	0.32
2017Q1	2.3168	2.82	0.5032	1.9921	2.5757	0.5836	2.1815	2.6151	0.4336	2.115	2.795	0.68	2.138	2.7099	0.5719
2017Q2	0.9448	2.3	1.3552	1.9	2.5	0.6	2	2.7685	0.7685	2.1	2.7233	0.6233	2	2.5	0.5
2017Q3	1.3	1.916	0.616	2	2.66	0.66	2	2.6	0.6	1.9042	2.3	0.3958	1.9492	2.4	0.4508
2017Q4	1.9889	2.995	1.0061	1.8	2.355	0.555	1.7632	2.2142	0.4509	1.9022	2.3138	0.4116	1.9	2.4862	0.5862
2018Q1	2.2	2.9632	0.7632	1.62	2.4	0.78	1.9	2.5374	0.6374	2	2.5596	0.5596	2	2.53	0.53
2018Q2	1.7	2.4	0.7	2	2.8	0.8	2	2.7314	0.7314	2.0245	2.7825	0.758	2	2.5327	0.5327
2018Q3	2.0503	2.5028	0.4526	2.1	2.5181	0.4181	2.2	2.5796	0.3796	1.9	2.5	0.6	2.0057	2.552	0.5463
2018Q4	2.1309	2.6356	0.5047	2.2712	2.6	0.3288	2	2.6	0.6	2.11	2.6212	0.5112	2.0614	2.7231	0.6617
2019Q1	0.8	1.7	0.9	2	2.6748	0.6748	2.0507	2.5976	0.5469	2.0342	2.4	0.3658	1.9037	2.5942	0.6905
2019Q2	2	3.42	1.42	1.9509	2.37	0.4191	1.9468	2.3319	0.3851	1.8	2.3859	0.5859	1.72	2.25	0.53
2019Q3	1.5	2.2449	0.7449	1.7272	2.4	0.6728	1.8925	2.358	0.4655	1.7	2.3	0.6	1.896	2.3	0.404
2019Q4	1.5023	2.0675	0.5652	1.9106	2.4399	0.5294	1.811	2.3	0.489	1.9044	2.3	0.3956	1.8266	2.3646	0.538
2020Q1	1.69	2.2	0.51	1.7	2.25	0.55	2	2.4157	0.4157	2	2.4266	0.4266	1.9287	2.4615	0.5328
2020Q2	-4	-0.26	3.74	1.1672	2.0469	0.8797	1.55	2.3608	0.8108	1.4	2.4034	1.0034	1.5274	2.255	0.7276
2020Q3	1.1477	3.3405	2.1928	1.1994	2.065	0.8656	1.1777	2.05	0.8723	1.2	2.225	1.025	1.4342	2.4608	1.0267
2020Q4	1.6667	2.5791	0.9124	1.5	2.4594	0.9594	1.5	2.3931	0.8931	1.7	2.3723	0.6723	1.7122	2.5	0.7878
2021Q1	1.9729	3.3595	1.3866	1.7057	2.4	0.6943	1.8151	2.4	0.5849	2	2.5295	0.5295	2	2.4	0.4
2021Q2	2.4941	4.0331	1.5389	2.3465	3.125	0.7785	2.0417	2.8	0.7583	2	2.7	0.7	2.016	2.6	0.584
2021Q3	3.9512	6.225	2.2738	1.9413	3.25	1.3087	2.0091	2.9261	0.9169	1.93	2.7996	0.8696	2.1	2.6	0.5
2021Q4	4.0609	5.3101	1.2492	2.6547	4.1792	1.5246	2.209	3.4	1.191	2.1993	3.1	0.9007	2.1	2.8525	0.7525

[truncated: 34 more sheets: CORECPI, PCE, COREPCE, CPI5YR, PCE5YR, CPI10, PCE10, RGDP10, PROD10, STOCK10, BOND10, BILL10, UBAR, SPR_Tbond_Tbill, SPR_BAA_AAA, SPR_BAA_TBOND, SPR_AAA_TBOND, CPIF5, PCEF5, RR1_TBILL_PGDP …]
