# Supplementary material for: Optimal Macroeconomic Policy in Nonlinear Models: A VSTAR Perspective
Source: publisher site journal article supplement (doi:10.1515/snde-2024-0100), 2025-10-08
Supplement: Supplementary file 93 [file Dispersion_2.xlsx]

## Sheet: NGDP
Measures of Cross-Sectional Dispersion for Quarterly Forecasts for NOMINAL GROSS DOMESTIC PRODUCT (NGDP)
Units: Annualized Percentage Points
Dispersion Measure D2 = 75th Percentile Minus 25th Percentile of the Forecasts for Q/Q Growth
P25 = 25th Percentile of the Forecasts for Q/Q Growth
P75 = 75th Percentile of the Forecasts for Q/Q Growth
At Each Survey Date T, the Quarterly Horizons Are T, T+1, T+2, T+3, and T+4
Survey_Date(T)	NGDP_P25_D2(T)	NGDP_P75_D2(T)	NGDP_D2(T)	NGDP_P25_D2(T+1)	NGDP_P75_D2(T+1)	NGDP_D2(T+1)	NGDP_P25_D2(T+2)	NGDP_P75_D2(T+2)	NGDP_D2(T+2)	NGDP_P25_D2(T+3)	NGDP_P75_D2(T+3)	NGDP_D2(T+3)	NGDP_P25_D2(T+4)	NGDP_P75_D2(T+4)	NGDP_D2(T+4)
1968Q4	5.6258	7.077	1.4511	4.5917	6.9299	2.3382	4.5707	6.3907	1.82	5.8908	8.1684	2.2776	6.646	8.3703	1.7243
1969Q1	5.0478	6.9299	1.8821	4.5038	5.9311	1.4273	5.3381	7.6243	2.2861	5.344	8.005	2.661	#N/A	#N/A	#N/A
1969Q2	5.8841	7.2781	1.394	4.8962	6.7054	1.8092	3.9361	6.1588	2.2227	4.3214	6.4739	2.1526	#N/A	#N/A	#N/A
1969Q3	5.291	7.1005	1.8095	3.919	6.0852	2.1663	3.856	6.0199	2.1638	3.8152	6.4254	2.6103	#N/A	#N/A	#N/A
1969Q4	4.3097	5.6294	1.3197	2.9549	5.1327	2.1777	2.9241	5.0623	2.1382	5.4296	7.5757	2.1461	6.1679	7.8924	1.7245
1970Q1	2.9706	4.6976	1.7269	3.3646	5.0945	1.7299	4.5898	7.174	2.5842	5.8746	8.2773	2.4027	#N/A	#N/A	#N/A
1970Q2	4.2322	5.5277	1.2955	4.6381	7.1892	2.551	5.8318	7.8761	2.0442	6.1301	7.7084	1.5783	6.0134	8.0202	2.0068
1970Q3	5.041	7.1892	2.1481	5.3569	7.0696	1.7127	6.1364	8.1509	2.0145	6.0681	7.6541	1.5859	6.3284	7.9171	1.5886
1970Q4	2.0439	3.7014	1.6575	7.0186	11.3875	4.3689	6.4626	8.8926	2.43	5.4728	7.4662	1.9933	6.398	8.2351	1.8371
1971Q1	9.6118	12.2421	2.6304	7.2845	9.3293	2.0448	4.7051	7.0909	2.3858	7.6005	9.773	2.1725	7.6889	9.9353	2.2464
1971Q2	8.0932	10.191	2.0978	5.4889	7.1049	1.616	7.7937	9.8499	2.0562	8.3686	10.7703	2.4017	8.1972	9.8228	1.6256
1971Q3	7.3935	9.8209	2.4274	8.7361	10.4617	1.7256	8.5257	10.2728	1.747	8.04	10.239	2.1991	7.5203	9.5807	2.0603
1971Q4	7.1592	8.9615	1.8022	8.1717	10.7497	2.578	8.2355	10.1094	1.8739	8.2159	10.2438	2.0279	8.1846	10.0239	1.8393
1972Q1	9.2249	11.6614	2.4365	9.0171	11.2994	2.2823	8.7461	10.343	1.5968	8.6051	10.372	1.7669	7.6688	9.4715	1.8027
1972Q2	9.7675	11.7249	1.9575	9.1476	10.6675	1.5199	8.5744	10.0015	1.4271	8.0205	9.9043	1.8837	8.1178	9.5417	1.4239
1972Q3	9.4482	10.58	1.1317	8.8405	10.6577	1.8172	8.7477	10.4264	1.6786	8.4237	9.811	1.3873	7.2879	8.924	1.6361
1972Q4	9.2385	11.0861	1.8475	9.0458	10.4627	1.4169	8.4521	9.8193	1.3672	7.8781	8.9019	1.0238	6.791	8.4508	1.6598
1973Q1	10.0575	11.1396	1.0821	8.8459	10.1274	1.2815	7.2399	8.88	1.6401	6.7097	8.4439	1.7342	6.3023	8.2172	1.9149
1973Q2	8.6835	11.4656	2.7822	7.5101	9.4361	1.9261	6.4031	8.2563	1.8532	6.2384	8.3839	2.1455	5.4824	7.6507	2.1683
1973Q3	7.2842	8.5701	1.2859	5.5844	7.7635	2.1791	4.8809	7.0337	2.1528	5.6597	7.4847	1.825	6.1588	8.3105	2.1516
1973Q4	6.9212	8.543	1.6218	4.284	6.462	2.178	4.2354	7.2753	3.0399	5.441	8.1132	2.6723	6.0727	8.8509	2.7782
1974Q1	3.9554	6.1332	2.1778	5.4451	7.6099	2.1649	6.9018	9.37	2.4682	8.2554	10.6419	2.3866	7.5221	10.1777	2.6556
1974Q2	6.3593	9.4919	3.1326	7.7751	9.8694	2.0943	8.2614	10.8133	2.5518	8.5547	10.906	2.3513	8.4166	11.097	2.6804
1974Q3	7.4236	9.8841	2.4606	7.6157	10.5717	2.956	7.6807	10.8399	3.1593	7.8231	10.6057	2.7826	#N/A	#N/A	#N/A
1974Q4	4.6003	7.4058	2.8055	5.9664	8.35	2.3836	7.3313	10.2557	2.9244	9.1514	11.6711	2.5197	9.7889	12.7272	2.9383
1975Q1	1.1252	4.9929	3.8677	5.2325	8.8647	3.6322	8.6563	12.527	3.8707	10.1095	13.3876	3.278	9.0191	12.2024	3.1833
1975Q2	3.137	7.2357	4.0986	7.2304	11.876	4.6456	9.9748	13.886	3.9113	9.5012	13.1161	3.6149	10.5523	13.0721	2.5197
1975Q3	9.236	14.3953	5.1593	10.7329	14.3978	3.6649	10.8601	13.9175	3.0575	10.838	13.2307	2.3927	10.8154	13.0982	2.2829
1975Q4	11.4057	13.5933	2.1876	10.0752	13.4444	3.3692	9.9475	12.6251	2.6776	10.2027	12.5983	2.3955	10.28	13.1218	2.8418
1976Q1	10.8407	12.4981	1.6574	10.3813	12.8875	2.5062	10.2773	12.6036	2.3263	10.9825	13.0579	2.0754	10.5492	12.0332	1.484
1976Q2	10.0086	12.5564	2.5478	11.0384	12.5248	1.4864	11.2433	12.7846	1.5413	10.4336	12.0938	1.6602	9.8294	11.6862	1.8568
1976Q3	9.7717	11.8498	2.0781	11.3785	12.8186	1.4402	10.611	12.268	1.6571	10.3307	12.0264	1.6958	9.9595	11.5242	1.5648
1976Q4	9.6902	11.8121	2.1219	10.1817	11.648	1.4663	10.1594	11.9	1.7406	9.8163	12.0302	2.2139	9.3548	11.9285	2.5737
1977Q1	8.2481	10.683	2.4349	10.6454	14.3497	3.7043	9.6806	12.5963	2.9157	9.8156	12.1217	2.3061	8.4611	11.4417	2.9807
1977Q2	12.1152	14.3188	2.2037	11.2729	13.3763	2.1034	10.6984	12.9333	2.2349	9.8183	11.6905	1.8722	9.3435	11.4116	2.0682
1977Q3	9.7546	12.3009	2.5463	10.7898	12.9192	2.1294	10.0448	11.5281	1.4833	10.036	11.5469	1.5109	9.2555	11.4319	2.1764
1977Q4	9.9817	12.0189	2.0372	9.5249	11.293	1.7681	9.2605	10.9946	1.7341	9.0876	11.1998	2.1122	9.3597	11.1451	1.7854
1978Q1	9.9162	11.6748	1.7586	9.2367	11.3265	2.0898	9.1662	10.8069	1.6406	9.6414	12.0633	2.4219	7.7447	11.1436	3.3989
1978Q2	11.9402	16.1483	4.208	9.6902	11.5273	1.8371	9.6507	11.4496	1.7989	8.1017	10.4528	2.3511	7.6865	10.2485	2.562
1978Q3	10.3968	12.2755	1.8786	9.5197	11.2899	1.7702	7.6157	11.2143	3.5986	7.4803	10.4199	2.9396	6.3834	10.1555	3.7721
1978Q4	9.8742	12.282	2.4079	7.9245	10.7938	2.8693	6.3834	10.8601	4.4766	6.1724	9.8827	3.7103	6.1724	9.9881	3.8157
1979Q1	9.1638	11.894	2.7302	8.7144	10.2344	1.52	4.9352	8.7158	3.7807	5.2505	9.7169	4.4664	5.9622	10.9059	4.9437
1979Q2	8.9342	11.9772	3.0429	6.7145	8.8915	2.1771	5.9399	8.8432	2.9034	6.576	10.2222	3.6463	8.2106	10.4101	2.1995
1979Q3	5.7048	8.4185	2.7137	4.8101	8.0066	3.1964	5.4525	9.3083	3.8558	8.4343	11.6421	3.2078	10.5029	12.8816	2.3787
1979Q4	6.2423	8.9834	2.7412	3.4109	6.1986	2.7877	4.304	8.0599	3.7559	8.2094	11.087	2.8776	9.2503	12.8398	3.5895
1980Q1	7.0458	10.8243	3.7785	5.4959	8.1492	2.6533	5.4959	8.7118	3.2158	7.8098	10.5926	2.7827	8.4002	13.227	4.8268
1980Q2	3.2126	6.502	3.2894	4.0115	6.813	2.8015	6.3675	8.9761	2.6087	8.3668	12.0233	3.6565	9	12.4171	3.4172
1980Q3	2.8844	5.9963	3.1119	6.0807	9.0017	2.921	7.8859	13.2036	5.3177	7.6244	13.717	6.0926	10.6984	14.5231	3.8247
1980Q4	9.9525	13.1247	3.1722	9.1825	12.1057	2.9233	10.7973	13.1533	2.356	11.6247	14.1946	2.5698	11.5995	14.4341	2.8346
1981Q1	10.1418	12.1957	2.0539	9.7241	11.7346	2.0105	11.6332	13.7864	2.1532	12.2215	14.5078	2.2863	11.6928	14.5214	2.8286
1981Q2	8.0827	10.2785	2.1958	9.3805	11.9279	2.5474	11.5562	14.2834	2.7272	11.1625	13.9425	2.78	9.2766	13.068	3.7914
1981Q3	6.9762	8.2992	1.323	9.0348	12.0087	2.9738	9.2403	13.466	4.2257	9.7098	13.1245	3.4148	10.7105	13.2701	2.5597
1981Q4	3.2976	5.8237	2.5262	5.2187	9.4121	4.1934	8.9803	11.9729	2.9926	10.095	14.0007	3.9056	11.1904	14.5421	3.3517
1982Q1	2.434	5.4688	3.0349	6.928	10.4454	3.5174	10.2292	13.1157	2.8866	11.1549	13.4592	2.3043	10.3078	12.2626	1.9548
1982Q2	3.5179	6.4264	2.9085	7.7661	11.3184	3.5523	8.7418	11.723	2.9812	6.6691	10.1419	3.4728	7.6721	10.5639	2.8919
1982Q3	6.879	9.2301	2.3511	7.6863	10.0701	2.3838	7.4615	9.8309	2.3694	7.8659	9.9683	2.1024	8.1865	10.9783	2.7917
1982Q4	5.0255	7.7196	2.6941	7.0863	9.5237	2.4374	7.9297	9.4839	1.5541	8.7945	10.5561	1.7616	8.2916	11.2216	2.9299
1983Q1	7.1498	8.6532	1.5033	7.1224	9.3349	2.2125	7.9857	10.1712	2.1856	7.9123	10.9984	3.0861	7.8854	10.4651	2.5797
1983Q2	8.1711	10.2083	2.0371	8.6518	10.8865	2.2347	8.427	10.4509	2.0239	8.3958	10.375	1.9792	9.476	10.6191	1.1431
1983Q3	8.5703	12.2548	3.6845	8.7415	10.6132	1.8717	7.8779	10.0361	2.1582	8.3339	10.0452	1.7114	8.362	9.7039	1.3419
1983Q4	9.6052	11.3999	1.7947	8.5677	10.2421	1.6744	8.5223	10.1114	1.5891	8.8896	10.4578	1.5682	8.2857	10.3363	2.0506
1984Q1	9.118	10.9094	1.7914	8.5596	9.8868	1.3272	8.4817	10.244	1.7623	8.3056	9.8999	1.5943	7.3809	9.571	2.1901
1984Q2	7.5407	9.2271	1.6865	8.0517	9.3948	1.3431	8.158	10.0164	1.8584	7.6116	9.8096	2.198	7.2861	9.511	2.2249
1984Q3	8.1316	9.7686	1.637	7.9696	9.5464	1.5768	7.5704	8.8547	1.2843	6.1261	9.2976	3.1715	6.383	9.3024	2.9194
1984Q4	6.1912	7.5544	1.3632	6.4276	8.5573	2.1297	6.954	8.6066	1.6526	7.0509	8.6449	1.594	7.2473	8.8732	1.626
1985Q1	6.9977	7.9995	1.0018	7.0443	8.8098	1.7655	7.2854	8.8278	1.5424	7.0389	8.7869	1.748	6.2893	8.981	2.6917
1985Q2	6.3226	7.4293	1.1066	7.5349	9.031	1.4961	7.1726	8.9274	1.7548	7.1638	8.5115	1.3476	6.5265	8.351	1.8245
1985Q3	5.8317	7.6827	1.851	6.6801	8.2777	1.5977	5.9456	8.397	2.4514	5.9685	8.3636	2.3951	5.6141	8.1924	2.5783
1985Q4	6.0573	7.4519	1.3946	5.4423	7.4215	1.9792	5.5917	7.3978	1.8061	6.588	7.9911	1.4032	6.5132	7.816	1.3027
1986Q1	5.835	7.6967	1.8617	5.9537	7.1313	1.1775	6.3357	7.706	1.3703	6.3702	7.6613	1.291	4.6569	7.1317	2.4748
1986Q2	3.6418	5.3022	1.6603	5.384	7.4947	2.1107	6.3023	8.1992	1.897	5.8956	7.4948	1.5991	4.5603	7.345	2.7847
1986Q3	3.2446	5.1678	1.9232	4.3798	6.6367	2.2569	4.5721	7.0271	2.455	4.8471	7.7743	2.9272	5.5497	7.365	1.8152
1986Q4	4.4659	5.7852	1.3192	4.402	6.3783	1.9763	5.1797	6.55	1.3704	5.9568	7.3151	1.3584	6.1826	7.5197	1.3371
1987Q1	4.769	6.7349	1.9659	5.2906	6.8255	1.5348	6.2811	7.93	1.6489	6.0423	8.4359	2.3936	4.9924	7.6106	2.6182
1987Q2	4.8271	6.6039	1.7767	6.4807	7.4691	0.9884	6.1842	7.5535	1.3693	6.2832	7.5098	1.2266	6.2515	7.4264	1.1749
1987Q3	5.8808	7.389	1.5082	6.7189	8.568	1.8491	6.7204	8.1328	1.4124	5.8443	7.2994	1.4551	5.3368	7.5976	2.2609
1987Q4	5.0117	6.4852	1.4735	4.0785	5.9959	1.9174	4.3047	6.8456	2.5409	5.5287	7.122	1.5933	5.9718	7.0572	1.0854
1988Q1	2.4582	4.9548	2.4966	3.5934	6.231	2.6376	4.8793	7.2484	2.3691	5.5632	7.3837	1.8205	5.8852	8.3792	2.494
1988Q2	5.4184	7.9345	2.5161	5.2694	7.0508	1.7814	5.7845	7.1936	1.4091	5.3902	7.3151	1.9249	5.3569	7.4642	2.1073
1988Q3	6.2143	7.3506	1.1363	6.0247	7.0503	1.0255	5.8391	8.2261	2.387	4.8871	7.475	2.5879	5.7494	7.0247	1.2754
1988Q4	5.7527	7.2074	1.4547	7.0258	10.3424	3.3166	6.2349	7.7369	1.502	5.8964	7.2655	1.3691	4.7162	7.1254	2.4093
1989Q1	7.5812	9.3627	1.7815	5.5226	7.2188	1.6962	5.6713	6.9153	1.244	5	7.147	2.147	5.3403	7.1135	1.7732
1989Q2	6.2382	7.1494	0.9112	5.3337	7.5547	2.221	5.0985	7.298	2.1996	5.3822	7.0824	1.7002	4.983	6.9119	1.9289
1989Q3	5.3395	6.0619	0.7224	5.3575	7.0332	1.6757	5.5689	7.4579	1.8889	5.2869	7.43	2.1432	6.0561	7.715	1.6589
1989Q4	4.3162	6.0495	1.7333	4.3476	6.4983	2.1506	4.714	7.1252	2.4112	4.9878	7.0533	2.0656	6.5163	8.5911	2.0748
1990Q1	4.8837	5.6626	0.7789	5.2829	7.342	2.0591	5.36	7.2996	1.9396	6.4133	7.1654	0.7521	6.146	7.5951	1.4491
1990Q2	5.3197	7.4016	2.0819	5.4067	7.2897	1.883	5.2601	6.7094	1.4492	5.9286	7.0401	1.1115	5.8897	6.4985	0.6088
1990Q3	4.0211	6.23	2.2089	4.6629	5.6944	1.0315	4.8228	6.2111	1.3883	4.8733	6.337	1.4637	5.6584	6.8874	1.229
1990Q4	2.3267	4.8745	2.5477	2.9313	4.9463	2.015	3.0285	5.1574	2.129	4.8959	6.3518	1.456	5.5043	7.0808	1.5765
1991Q1	1.3989	4.3602	2.9614	2.771	4.7937	2.0227	4.7448	6.2881	1.5433	5.3308	6.5315	1.2007	5.5585	7.1011	1.5425
1991Q2	2.5586	4.2366	1.6781	4.8573	6.3282	1.471	5.7082	6.8058	1.0976	6.2371	7.265	1.0279	5.4296	6.905	1.4754
1991Q3	4.7072	6.1885	1.4812	5.4904	7.2731	1.7827	6.0123	6.8208	0.8085	5.7099	7.2609	1.5511	5.6888	6.9058	1.2171
1991Q4	3.8129	4.92	1.1071	4.8777	6.1422	1.2645	5.2764	6.4723	1.1959	5.9833	6.7085	0.7252	5.7481	6.5026	0.7546
1992Q1	2.6121	4.5	1.8879	4.4138	6.0632	1.6494	5.2684	7	1.7316	5.4353	7.1893	1.754	5.1527	7.2034	2.0507
1992Q2	5.1148	7.1596	2.0448	5.6623	6.9541	1.2918	5.6869	6.8115	1.1246	5.7028	7.136	1.4332	5.6892	6.6497	0.9605
1992Q3	4.1664	5.3999	1.2335	4.469	6.0131	1.5441	4.9537	6.5717	1.6181	5.1046	6.4	1.2954	5.2104	6.4991	1.2887
1992Q4	4.0693	5.1162	1.0469	4.8711	5.751	0.8799	5.1538	6.3022	1.1484	5.3	6.5202	1.2202	5.1526	6.9294	1.7768
1993Q1	5.1	6.2241	1.1242	5.0648	6.4	1.3352	5.213	6.5685	1.3554	5.5804	6.5962	1.0159	5.5266	6.5	0.9734
1993Q2	4.9069	6.3279	1.421	5.4	6.9253	1.5253	5.7921	6.854	1.0619	5.5931	6.7071	1.1141	5.5	6.9852	1.4852
1993Q3	5.4974	6.4194	0.9221	5.4123	6.5471	1.1348	5.3727	6.2356	0.8629	5.0584	6.3854	1.327	5.2698	6.3858	1.116
1993Q4	5.771	6.65	0.879	5.2743	6.4	1.1257	5.0377	6.0586	1.0209	5.1392	6.5158	1.3765	5.2505	6.2725	1.0219
1994Q1	5.677	6.5957	0.9187	5.0959	6.3047	1.2089	5.3676	6.6645	1.2969	5.1953	5.9466	0.7513	5.1817	6.182	1.0003
1994Q2	6	7.0798	1.0798	5.471	6.4895	1.0185	5.3346	6.2316	0.897	5.2672	6	0.7328	5.1064	6.2573	1.1509
1994Q3	4.9117	6.1079	1.1962	5.4	6.2	0.8	5.2022	5.9414	0.7392	5.2	6.1177	0.9178	5.2344	6.201	0.9666
1994Q4	5.4566	6.5	1.0434	5.3964	6.6	1.2036	4.8269	6.4	1.5731	5	6.2	1.2	5.055	6.2304	1.1754
1995Q1	5.2461	6.4058	1.1597	4.9468	6.181	1.2342	4.8566	5.6593	0.8028	4.7426	5.8576	1.115	4.7284	6.1	1.3717
1995Q2	4.1138	5.1596	1.0457	4.6561	5.6233	0.9672	4.9502	6.2517	1.3015	5.1788	6.1396	0.9607	4.9964	5.9879	0.9915
1995Q3	3.8651	4.9778	1.1126	4.9169	6.1851	1.2682	5.0461	6.1332	1.0871	4.9	6.0193	1.1193	4.8324	5.7742	0.9417
1995Q4	3.5698	4.8688	1.299	4.4845	5.3636	0.8791	4.3923	5.1358	0.7435	4.2976	5.311	1.0134	4.3	5.4121	1.112
1996Q1	3.1	4.7699	1.67	4	5.1992	1.1991	4.2	5.441	1.241	4.3287	5.4	1.0713	4.3	5.4815	1.1815
1996Q2	4.9335	6.0542	1.1207	4.3	5.2	0.9	3.9476	5	1.0524	4.1656	5.2	1.0344	4	5.2	1.2
1996Q3	4.7355	6.0135	1.278	4.2967	5.3658	1.0691	4.4	5.5048	1.1048	4.1	5.1585	1.0585	3.9653	5.0514	1.0861
1996Q4	4.3	5.4111	1.1111	4.6	5.4078	0.8078	4.2262	5.2268	1.0006	4.234	5.2001	0.9661	4.3047	5.3	0.9953
1997Q1	4.1724	5.3608	1.1884	4.3	5.1221	0.8221	4.1969	5.1422	0.9453	4.4454	5.2387	0.7933	4.4956	5.1724	0.6769
1997Q2	4.225	5.3362	1.1112	4.6904	5.457	0.7666	4.4443	5.3277	0.8834	4.1	5.099	0.999	3.9689	5.0398	1.0709
1997Q3	4.6047	5.3	0.6952	4.5793	5.5218	0.9425	4.4	5.3793	0.9793	4.4361	5.1791	0.743	4.4471	5.3	0.8529
1997Q4	4.5404	5.5883	1.0479	4.2658	5.0295	0.7637	4.2256	5.1379	0.9123	4.0175	4.9689	0.9514	3.8987	5.05	1.1513
1998Q1	3.8	4.9979	1.1979	3.3459	4.7563	1.4105	3.6	4.4864	0.8864	3.9	4.8245	0.9245	4.4031	5.0297	0.6266
1998Q2	3.6698	4.5325	0.8627	3.7505	4.443	0.6926	3.6655	4.8521	1.1866	4.1066	4.9946	0.888	4.0735	4.8394	0.7659
1998Q3	2.85	4.05	1.2	3.9547	5.2404	1.2857	3.7516	5.0262	1.2746	3.8938	4.7442	0.8505	4.237	5.2728	1.0359
1998Q4	2.8207	4.2749	1.4543	2.9116	4.2863	1.3746	2.9377	4.229	1.2913	2.6814	4.6542	1.9729	2.5366	4.9014	2.3648
1999Q1	3.7126	4.9409	1.2283	3.6	4.532	0.932	3.4194	4.4	0.9806	3.5367	4.9731	1.4364	3.1779	4.3237	1.1458
1999Q2	3.6549	4.9203	1.2654	3.7147	4.9722	1.2574	4	5.5448	1.5448	2.6526	4.3136	1.661	3.6647	4.9227	1.2579
1999Q3	4.6533	5.3297	0.6764	4.5682	5.5652	0.997	2.6219	4.6806	2.0586	4.062	5.145	1.0831	4.2126	5.1001	0.8874
1999Q4	4.8551	6.22	1.3649	3.1032	5.0888	1.9856	4.4277	6	1.5723	4.6416	5.7166	1.075	4.3461	5.7172	1.3712
2000Q1	3.9	5.6184	1.7185	4.5399	5.8398	1.2999	4.3486	5.6612	1.3127	4.1996	5.6961	1.4965	4.6108	5.6407	1.0299
2000Q2	5.6774	7.1	1.4226	5.2	6.3566	1.1566	4.8734	5.9395	1.0661	4.4438	6.1015	1.6577	4.6657	6.2926	1.627
2000Q3	5.0312	6.2	1.1688	5.2733	6.1411	0.8679	4.6	6.1	1.5	4.9315	5.8	0.8685	5.2	6.0024	0.8024
2000Q4	4.9	6.413	1.513	5.1148	6.1845	1.0697	5.1755	5.779	0.6035	5.1182	5.8832	0.7649	5.0926	6.2258	1.1332
2001Q1	2.633	3.8875	1.2545	3.5996	4.575	0.9754	4.4733	5.6432	1.1699	5.0546	6.253	1.1984	5.1337	6.4533	1.3196
2001Q2	3.2	4.2868	1.0868	3.7	5	1.3	3.9725	5.6987	1.7262	5	6	1.0001	4.8314	5.6736	0.8422
2001Q3	2.8046	3.8562	1.0516	3.9368	5.1	1.1632	4.6533	5.8	1.1467	4.5234	5.6168	1.0934	4.5944	5.8144	1.2201
2001Q4	-1.5406	0.3	1.8406	0.8	3.6917	2.8918	3.6203	4.756	1.1356	4.5902	6.0534	1.4631	4.8552	6.3168	1.4615
2002Q1	2.2	4.3504	2.1504	3.0163	5.7482	2.7319	4.4	5.8	1.4	4.3187	5.9	1.5813	4.8001	6.1871	1.387
2002Q2	3.6417	5.5215	1.8798	4.0097	5.8383	1.8286	4.2052	6.212	2.0069	4.8126	6.4533	1.6406	5.1	6.2	1.1
2002Q3	3.4893	4.9015	1.4122	3.9979	5.4647	1.4668	4.6448	6.2828	1.6379	4.8	5.8	1	5.2	6.0106	0.8106
2002Q4	2.5	3.8616	1.3617	4.0583	5.5361	1.4778	4.5	5.8113	1.3113	4.65	5.9417	1.2918	5.2	6.4133	1.2133
2003Q1	3.3	4.9982	1.6982	4	5.6	1.6	4.4	5.9	1.5	4.7217	6.0787	1.357	5.1929	6.6256	1.4326
2003Q2	3	4.5591	1.5591	4.3933	6.0827	1.6894	4.8087	5.8169	1.0082	5.108	6.3551	1.2472	4.8988	5.806	0.9072
2003Q3	4.6	5.7	1.1	4.8955	5.921	1.0255	5.2	6.1367	0.9367	4.9	5.8	0.9	4.8724	6.212	1.3396
2003Q4	5.1216	6.1562	1.0346	5.3	6.5263	1.2263	4.9861	6.3794	1.3933	5.0141	6.5238	1.5096	4.8163	6.2017	1.3854
2004Q1	5.5399	6.6538	1.1139	5.1413	6.1885	1.0472	4.9888	5.85	0.8612	4.9826	5.9637	0.9811	5	5.9769	0.9769
2004Q2	6.0204	7.1377	1.1173	5.4745	6.6365	1.162	5.3603	6.5064	1.1461	5.1361	6.4559	1.3197	4.8166	6.2846	1.4681
2004Q3	5.2702	6.1708	0.9006	5.363	6.922	1.559	5.165	6.5142	1.3492	5.3517	6.4039	1.0522	5.1	6.1091	1.0091
2004Q4	5.0737	6.1877	1.1139	4.9342	6.1645	1.2302	5.0466	5.9036	0.857	5.1379	5.9239	0.786	5.2612	6.216	0.9548
2005Q1	5.4215	6.5738	1.1523	5.2422	6.4	1.1579	5.2165	5.8	0.5835	5.2608	5.8831	0.6223	5.2	5.987	0.787
2005Q2	5.1065	6.2	1.0935	5.3703	6.0103	0.64	5.3211	6.1567	0.8356	5.0945	6.0677	0.9732	5.3184	6.0025	0.6841
2005Q3	5.9149	6.95	1.0351	5.3747	6.3365	0.9617	5.5	6.5001	1.0001	5.2791	6.1941	0.915	4.8768	5.8847	1.0079
2005Q4	5.3596	6.4542	1.0946	5.3391	7.0943	1.7552	5.2781	6.0251	0.747	4.9547	5.823	0.8683	5.0833	5.9	0.8167
2006Q1	6.1	7.5975	1.4975	5.1103	6.5	1.3897	4.9588	5.7726	0.8138	4.8	5.6851	0.8851	4.7749	5.9274	1.1525
2006Q2	5.6124	6.6311	1.0187	4.9139	6.2173	1.3034	4.7208	5.8412	1.1204	4.8141	6.0129	1.1988	4.5822	5.7851	1.2029
2006Q3	5.1	5.8209	0.7209	4.6952	5.9221	1.2269	4.9883	6.2823	1.294	4.8284	5.6995	0.8711	4.6279	5.9905	1.3626
2006Q4	3.7369	5.2542	1.5173	4.6914	6.0129	1.3215	4.7995	5.6351	0.8355	4.7319	5.6262	0.8943	4.8168	5.6	0.7832
2007Q1	4.4918	5.5611	1.0693	4.358	5.3681	1.0101	4.7403	5.6463	0.9061	4.796	5.6104	0.8144	4.9555	5.727	0.7715
2007Q2	4.5971	6.1012	1.5041	4	5.4	1.4	4.3357	5.4539	1.1181	4.9864	5.8072	0.8208	4.9118	5.6983	0.7865
2007Q3	3.5691	5.1856	1.6165	4.1648	5.3587	1.1939	4.7501	5.535	0.7849	4.6667	5.5388	0.8721	4.619	5.4368	0.8178
2007Q4	3.2241	4.4	1.1759	3.7	5.2166	1.5166	4.0392	5.3	1.2608	4.2718	5.3809	1.1091	4.4475	5.4846	1.0371
2008Q1	1.9515	3.8934	1.9419	2.568	4.6135	2.0455	3.6633	6.1066	2.4433	4.0964	5.2597	1.1633	4.3098	5.796	1.4862
2008Q2	2.0395	3.9282	1.8887	3.7849	5.2378	1.453	3.1019	5.0844	1.9824	3.936	5.4365	1.5005	4.5737	5.5833	1.0096
2008Q3	3.7	4.9	1.2	2.3873	3.9651	1.5779	2.9628	4.9	1.9372	3.3318	4.9197	1.5879	4.2172	5.2348	1.0176
2008Q4	-1.0412	0.7019	1.7431	-0.2394	1.7233	1.9627	0.7104	3.3698	2.6593	2.835	4.4482	1.6132	3.2227	4.9089	1.6862
2009Q1	-5.058	-2.5779	2.4801	-2.2015	0.1967	2.3982	0.1798	3.5357	3.3559	1.8531	4.6703	2.8172	3.1539	4.5179	1.364
2009Q2	-2.1479	0.9162	3.0642	0.6014	3.0648	2.4634	1.6595	4.0852	2.4256	2.7838	4.7434	1.9596	3.581	5.2303	1.6493
2009Q3	3.0238	4.9502	1.9265	2.7	4.8605	2.1605	3	5.0184	2.0184	2.8805	5.3189	2.4385	3.6222	5.5304	1.9082
2009Q4	3.5548	5.0517	1.4969	2.7496	4.9995	2.25	3.4506	4.9781	1.5275	3.8167	5.222	1.4052	3.9	5.267	1.367
2010Q1	3.7073	4.8199	1.1126	3.3108	4.4682	1.1574	3.7867	4.973	1.1864	3.904	5.1151	1.2111	4.1444	5.3	1.1556
2010Q2	3.7842	5.2852	1.501	3.9393	5.2526	1.3133	4.0913	5.1125	1.0213	3.9458	5.1518	1.2061	4.0743	5.3919	1.3176
2010Q3	3.1	4.2731	1.1731	3.2938	4.5	1.2062	3.7501	4.6	0.8499	3.846	5.2989	1.4529	3.5032	5.3	1.7968
2010Q4	2.5235	4.4498	1.9263	3.468	4.5661	1.0981	3.2187	4.9576	1.7389	3.6543	5.2994	1.645	4.2	5.2998	1.0998
2011Q1	4.4961	5.8258	1.3297	4.0174	5.6395	1.622	4.2164	5.3523	1.1358	4.3208	5.5899	1.2691	4.0021	5.5539	1.5518
2011Q2	4.7228	5.9415	1.2187	4.3578	6.0042	1.6464	4.2874	5.4516	1.1642	4.4	5.7189	1.3189	4.4522	5.6267	1.1745
2011Q3	3.326	4.5615	1.2355	3.7	4.8	1.1	3.7324	5	1.2676	3.935	5.0497	1.1147	3.8398	5.2017	1.3618
2011Q4	3.5337	5.1	1.5663	3.2961	5.0648	1.7687	3.0693	5	1.9307	3.73	5.191	1.461	3.8916	5.5756	1.684
2012Q1	3.3882	4.6347	1.2465	3.5617	4.8	1.2383	4.2	5.1335	0.9335	4.3469	5.423	1.0762	4.1164	5	0.8836
2012Q2	3.4426	4.8136	1.371	4.0492	4.8509	0.8017	4.157	5.1788	1.0218	4.0497	4.8931	0.8435	3.9502	5.0752	1.1251
2012Q3	3.1078	4.1487	1.0409	3.3198	4.3881	1.0682	3.4	4.4521	1.0521	3.683	4.7901	1.1071	4.0476	5.3999	1.3522
2012Q4	2.9468	4.1004	1.1535	3.0995	3.9427	0.8432	3.7375	4.6405	0.903	4.313	5.2928	0.9798	4.3292	5.3407	1.0115
2013Q1	3.0222	4.6848	1.6626	3.6854	4.5277	0.8423	4.0805	5.0265	0.946	4.184	5	0.816	4.4405	5.1944	0.7539
2013Q2	2.7979	4	1.2021	3.9738	4.7868	0.813	4.101	5.0361	0.9351	4.2	5.1166	0.9166	4.5	5.4309	0.9309
2013Q3	3.3602	4.42	1.0598	3.7966	4.6329	0.8363	3.8823	4.8632	0.9808	3.9883	4.9218	0.9335	4.4967	5.1234	0.6268
2013Q4	3.0162	4.1735	1.1573	3.9638	4.8191	0.8553	4.202	4.9266	0.7247	4.3108	5.0156	0.7048	4.5	5.1686	0.6686
2014Q1	2.8655	4.3698	1.5043	3.8	4.8	1	4.4	5.0674	0.6674	4.4502	5.0462	0.596	4.7362	5.4052	0.669
2014Q2	4.2555	5.4257	1.1702	4.5375	5.1385	0.6009	4.4629	5.1566	0.6937	4.3667	5.1604	0.7937	4.1333	5.2	1.0667
2014Q3	3.9	5.2403	1.3403	4.5362	5.2817	0.7455	4.4737	5.2135	0.7398	4.3027	5.2341	0.9314	4.3792	5.1849	0.8058
2014Q4	3.6294	4.8292	1.1998	4.1836	4.95	0.7664	4.2589	5.1446	0.8857	4.4562	5.2303	0.7741	4.5383	5.0932	0.555
2015Q1	2.7	4.2134	1.5134	4.0328	4.8986	0.8658	4.2289	5.191	0.9621	4.0797	5.1984	1.1187	4.2	5.143	0.943
2015Q2	3.3169	4.9	1.5831	4.3127	5.2251	0.9124	4.0142	5	0.9858	3.9	5.007	1.107	4	5.175	1.175
2015Q3	3.8602	4.8751	1.0149	3.8871	4.9028	1.0157	4.1016	4.9461	0.8445	4.4363	5.1782	0.7419	4.326	5.1186	0.7926
2015Q4	3.5026	4.4395	0.9369	3.8324	4.8134	0.981	4	5.0869	1.0869	4.0358	4.9681	0.9323	4	5.0026	1.0026
2016Q1	2.5226	3.8018	1.2792	3.5724	4.68	1.1076	3.9706	4.6478	0.6772	4	4.5332	0.5332	3.789	4.6	0.811
2016Q2	3.368	4.2435	0.8755	3.5054	4.3871	0.8817	3.963	4.6706	0.7076	3.7587	4.5689	0.8102	3.9519	4.8157	0.8639
2016Q3	3.5194	4.7471	1.2277	3.86	4.6676	0.8077	3.6925	4.3941	0.7016	4.0169	4.806	0.7891	3.9762	4.6789	0.7028
2016Q4	3.5989	4.4588	0.86	3.6818	4.4578	0.776	3.9326	4.724	0.7913	3.9202	4.5122	0.592	3.8705	4.5937	0.7231
2017Q1	3.9419	4.6331	0.6912	4.1554	4.8521	0.6968	4.2397	4.9657	0.726	4.1996	5.1017	0.9021	4.1614	5.1834	1.022
2017Q2	4.4	5.214	0.814	4.4208	4.9	0.4792	4.1	4.9646	0.8646	4.2629	4.9654	0.7025	4.3512	5.3826	1.0314
2017Q3	3.6822	4.8073	1.1251	3.9702	4.8	0.8298	3.7859	4.6918	0.9059	4.0134	5.0363	1.0229	3.9439	4.9	0.9561
2017Q4	3.9	4.7926	0.8926	4.0373	4.7	0.6627	4.072	4.8	0.728	4.1	4.5902	0.4902	3.9329	4.6943	0.7613
2018Q1	4.163	5.3543	1.1913	4.156	5.3945	1.2386	4.4254	5.1551	0.7297	4.3353	5.1282	0.7929	4.3101	5.2	0.8899
2018Q2	4.8	5.6432	0.8432	4.7959	5.5154	0.7195	4.6	5.3455	0.7455	4.5532	5.4	0.8468	4.4953	5.1835	0.6883
2018Q3	4.8615	5.6145	0.753	4.7745	5.6053	0.8308	4.4483	5.3404	0.8921	4.428	5.3189	0.8909	4.2935	5.0762	0.7827
2018Q4	4.3028	5.4365	1.1337	4.5649	5.3587	0.7938	4.4423	5.7431	1.3007	4.06	4.9303	0.8703	3.838	4.9051	1.0671
2019Q1	2.4959	4.2306	1.7348	4.1052	5.3393	1.2342	4.0514	4.6578	0.6064	3.9124	4.6402	0.7277	3.6579	4.5457	0.8878
2019Q2	3.2	5.052	1.852	3.8975	4.6441	0.7467	3.86	4.6277	0.7677	3.5	4.4963	0.9963	3.5602	4.7585	1.1984
2019Q3	3.2825	4.3508	1.0684	3.6689	4.4959	0.827	3.5462	4.4308	0.8846	3.3772	4.4782	1.101	3.515	4.6196	1.1045
2019Q4	3.1683	4.0401	0.8718	3.4944	4.1233	0.6289	3.675	4.5038	0.8288	3.5017	4.2274	0.7257	3.445	4.261	0.816
2020Q1	2.9798	3.9726	0.9928	3.5827	4.5502	0.9675	3.6167	4.4	0.7833	3.7625	4.5793	0.8168	3.6886	4.6175	0.9289
2020Q2	-37.211	-26.1273	11.0837	2.4172	20.345	17.9278	5.7418	10.6789	4.9371	4.0289	8.2465	4.2176	4.2666	8.1339	3.8673
2020Q3	16.9644	24.8326	7.8682	4.3333	10.1407	5.8073	4.1	8	3.9	4.069	5.8392	1.7702	4.3217	6.1143	1.7927
2020Q4	4.922	7.272	2.35	4.4	6.1828	1.7828	4.3015	5.8926	1.5912	4.2557	5.9791	1.7234	4.4757	5.8151	1.3395
2021Q1	4.0019	6.4189	2.417	5.7515	9.1063	3.3548	6.2358	9.0737	2.8379	5.5707	7.4389	1.8682	4.9039	6.1581	1.2541
2021Q2	8.4204	12.6647	4.2443	7.7845	10.4	2.6155	6.0622	8.4248	2.3625	5.1771	7.1	1.9229	4.8933	6.3	1.4067
2021Q3	9.4615	11.9551	2.4936	7.0596	9.3838	2.3242	5.3638	7.3302	1.9664	5.0712	6.8789	1.8077	4.8846	6.2427	1.3581
2021Q4	7.4328	9.8078	2.375	6.4981	8.2946	1.7966	5.5685	7.192	1.6236	5.1833	6.5494	1.366	4.6342	6.1688	1.5346

## Sheet: PGDP
Measures of Cross-Sectional Dispersion for Quarterly Forecasts for GDP PRICE INDEX (PGDP)
Units: Annualized Percentage Points
Dispersion Measure D2 = 75th Percentile Minus 25th Percentile of the Forecasts for Q/Q Growth
P25 = 25th Percentile of the Forecasts for Q/Q Growth
P75 = 75th Percentile of the Forecasts for Q/Q Growth
At Each Survey Date T, the Quarterly Horizons Are T, T+1, T+2, T+3, and T+4
Survey_Date(T)	PGDP_P25_D2(T)	PGDP_P75_D2(T)	PGDP_D2(T)	PGDP_P25_D2(T+1)	PGDP_P75_D2(T+1)	PGDP_D2(T+1)	PGDP_P25_D2(T+2)	PGDP_P75_D2(T+2)	PGDP_D2(T+2)	PGDP_P25_D2(T+3)	PGDP_P75_D2(T+3)	PGDP_D2(T+3)	PGDP_P25_D2(T+4)	PGDP_P75_D2(T+4)	PGDP_D2(T+4)
1968Q4	3.3192	6.7204	3.4012	3.265	3.2919	0.0269	3.2386	3.265	0.0264	3.2126	3.2386	0.026	3.187	3.2126	0.0256
1969Q1	3.265	3.2919	0.0269	3.2386	3.265	0.0264	3.2126	3.2386	0.026	3.187	3.2126	0.0256	#N/A	#N/A	#N/A
1969Q2	3.2386	3.2386	0	3.2126	3.2126	0	3.1618	3.187	0.0252	3.137	3.1618	0.0248	#N/A	#N/A	#N/A
1969Q3	3.187	6.4496	3.2626	3.137	3.1618	0.0248	3.1126	3.1618	0.0492	3.0649	3.1126	0.0477	#N/A	#N/A	#N/A
1969Q4	3.137	6.3473	3.2103	3.0886	6.2973	3.2087	3.0649	3.1126	0.0477	3.0187	3.0886	0.0699	2.996	3.0187	0.0226
1970Q1	3.0886	6.2973	3.2087	3.0649	3.0649	0	3.0416	3.0416	0	2.996	3.0187	0.0226	#N/A	#N/A	#N/A
1970Q2	3.0649	6.1997	3.1348	3.0187	6.1051	3.0865	2.996	3.0187	0.0226	2.9518	2.996	0.0442	2.9302	2.9738	0.0436
1970Q3	3.0187	3.0187	0	2.996	3.0187	0.0226	2.9518	2.9738	0.0219	2.9302	2.9518	0.0216	2.9089	2.9302	0.0213
1970Q4	3.5898	4.5021	0.9123	2.9628	4.1599	1.1972	2.9345	4.1141	1.1796	2.9089	3.7828	0.8739	2.8672	3.4604	0.5932
1971Q1	3.241	4.7399	1.4989	3.2126	4.0901	0.8775	3.1847	4.3237	1.139	2.8672	3.7446	0.8774	2.8267	3.974	1.1473
1971Q2	2.9047	4.3805	1.4758	2.8879	4.4975	1.6096	2.8468	3.7259	0.8791	2.8418	4.398	1.5562	2.7776	3.6271	0.8495
1971Q3	2.263	3.9768	1.7138	2.7815	3.9796	1.1981	2.7873	3.6629	0.8756	2.8068	4.1531	1.3463	2.7396	3.8352	1.0956
1971Q4	2.41	3.7033	1.2933	2.8157	3.9641	1.1484	2.798	3.6539	0.8559	2.7805	4.0088	1.2283	2.7452	3.8537	1.1085
1972Q1	3.1192	4.5609	1.4417	2.8068	3.6603	0.8535	2.7815	3.9074	1.126	2.768	4.1445	1.3765	2.9899	4.1218	1.1318
1972Q2	2.7873	4.0674	1.2801	2.768	3.6045	0.8365	2.749	3.8576	1.1087	2.992	4.0936	1.1017	2.7117	3.9109	1.1992
1972Q3	3.0606	3.6271	0.5665	3.0353	4.1161	1.0808	3.2829	4.1161	0.8332	2.9798	4.0632	1.0833	2.9578	4.0304	1.0726
1972Q4	2.7642	3.6045	0.8403	3.301	4.4131	1.1122	2.9899	3.5601	0.5701	2.9758	4.044	1.0682	2.9479	4.0142	1.0663
1973Q1	3.859	5.2639	1.4049	3.2606	3.9551	0.6945	3.3726	4.0535	0.6809	2.9292	4.1499	1.2206	3.042	4.5221	1.4801
1973Q2	4.077	5.1849	1.1079	3.7529	4.5738	0.8208	3.1891	4.5161	1.3269	3.1681	4.235	1.067	2.6297	3.9122	1.2825
1973Q3	4.4774	5.8109	1.3335	4.1852	5.2277	1.0425	3.6102	4.6117	1.0015	3.3256	4.3018	0.9762	3.265	4.012	0.747
1973Q4	4.9908	7.0161	2.0252	4.7863	7.0332	2.2469	4.8145	6.398	1.5835	3.7971	5.3187	1.5216	3.7614	5.244	1.4826
1974Q1	7.0127	8.3507	1.3381	6.0974	7.6643	1.567	4.968	6.5142	1.5462	4.6891	6.3784	1.6893	3.8783	5.3419	1.4635
1974Q2	7.3365	9.1604	1.8239	6.1882	7.4273	1.239	4.8476	6.8227	1.9751	4.7611	6.4631	1.702	4.6776	6.0378	1.3602
1974Q3	7.6298	9.6677	2.0379	7.2087	8.967	1.7583	6.1339	8.0245	1.8905	5.855	7.4431	1.5881	#N/A	#N/A	#N/A
1974Q4	9.3831	11.6388	2.2557	8.2046	9.4333	1.2287	6.934	8.3369	1.403	6.5431	7.8308	1.2877	5.6586	7.2182	1.5596
1975Q1	8.358	10.2783	1.9203	7.0288	9.1112	2.0823	6.6094	8.1885	1.5791	6.0458	7.2534	1.2075	4.3869	6.6024	2.2155
1975Q2	5.8576	7.013	1.1553	5.3204	6.7016	1.3813	5.2277	6.5768	1.3491	4.7431	6.467	1.7238	4.2821	6.3305	2.0485
1975Q3	5.5496	6.9152	1.3656	5.0168	6.6423	1.6255	5.1686	6.5374	1.3688	5.1027	6.398	1.2954	5.2634	6.6714	1.4079
1975Q4	6.1521	8.0769	1.9248	5.3969	6.5108	1.1139	5.725	6.5901	0.8651	5.5415	6.9124	1.3709	5.6518	7.3707	1.7189
1976Q1	5.0463	6.0134	0.967	5.6061	6.2482	0.642	5.55	6.7669	1.2169	6.0589	6.9645	0.9056	5.1137	6.8812	1.7675
1976Q2	4.817	6.2482	1.4311	5.2418	6.502	1.2602	5.8789	6.7025	0.8236	5.5175	6.4695	0.952	5.4851	6.9873	1.5022
1976Q3	4.9071	6.1616	1.2545	5.3171	6.3786	1.0614	5.2312	6.2346	1.0034	5.3263	6.2043	0.8781	5.3949	6.5443	1.1494
1976Q4	4.8476	6.1051	1.2575	5.0888	6.0111	0.9223	5.0268	6.2181	1.1913	4.9662	6.028	1.0618	5.3369	6.4619	1.125
1977Q1	5.0793	6.302	1.2227	5.0119	5.9685	0.9566	4.6572	5.8336	1.1765	5.4802	6.3473	0.8671	5.1163	6.2659	1.1497
1977Q2	6.0712	7.1295	1.0583	5.524	6.4214	0.8974	5.7581	6.8842	1.1261	5.4121	6.4882	1.0762	5.3861	6.4114	1.0253
1977Q3	5.2277	7.0149	1.7873	5.7539	6.9139	1.16	5.6324	6.5436	0.9111	5.562	6.6414	1.0794	5.4857	6.5912	1.1055
1977Q4	5.4488	6.6237	1.1749	5.6324	6.2393	0.6068	5.3043	6.4025	1.0982	5.441	6.3407	0.8998	5.707	6.8305	1.1235
1978Q1	5.6603	6.8206	1.1603	5.516	6.4203	0.9044	5.4782	6.5912	1.113	5.9564	7.0818	1.1254	5.3322	6.6755	1.3434
1978Q2	5.5543	7.4239	1.8696	5.6159	7.1499	1.534	6.2039	7.7111	1.5072	5.834	6.9493	1.1153	6.0173	7.3173	1.3
1978Q3	7.0818	8.2038	1.122	6.6711	9.1587	2.4876	6.5617	8.9361	2.3744	6.2037	7.7484	1.5447	5.6038	7.4968	1.8931
1978Q4	6.4023	8.3206	1.9183	6.536	7.891	1.3551	6.6944	7.814	1.1196	5.1272	7.6302	2.5031	5.9984	7.7008	1.7025
1979Q1	7.891	9.2442	1.3531	7.7136	8.2592	0.5456	7.3226	8.0973	0.7747	6.7037	7.8975	1.1938	6.4456	7.3365	0.8909
1979Q2	8.2538	9.3174	1.0635	7.6827	8.986	1.3034	6.923	8.9084	1.9853	6.7814	7.9792	1.1978	6.6644	8.3216	1.6571
1979Q3	8.684	10.1189	1.4349	8.1166	9.8816	1.765	7.6981	9.5743	1.8762	7.7635	9.0774	1.3139	6.9763	8.5183	1.542
1979Q4	9.4114	10.1816	0.7703	7.2044	9.1896	1.9852	7.7635	9.2331	1.4696	7.1669	8.5775	1.4105	6.1121	8.9833	2.8713
1980Q1	8.2084	10.4633	2.2549	8.292	9.963	1.6709	8.0536	9.9492	1.8956	7.4231	9.539	2.1159	7.1282	8.8382	1.71
1980Q2	8.5161	10.9753	2.4592	8.3386	9.9665	1.6279	7.0288	10.2688	3.24	6.8127	9.6902	2.8775	7.3027	9.2888	1.9861
1980Q3	7.5853	9.6069	2.0216	8.2408	9.8579	1.6171	6.6281	9.0627	2.4346	7.455	8.9856	1.5307	7.6461	8.9001	1.2541
1980Q4	9.0238	10.6637	1.6399	8.8836	10.3928	1.5091	8.2076	9.4815	1.2739	7.6077	9.6978	2.0902	8.14	10.0463	1.9063
1981Q1	8.9833	10.6276	1.6442	8.7861	10.33	1.5439	8.5974	10.2703	1.6729	8.4166	10.0659	1.6493	7.9696	9.3959	1.4263
1981Q2	8.0945	9.5042	1.4097	8.3669	9.0804	0.7134	8.4611	9.9529	1.4919	7.8517	9.0387	1.187	7.973	8.777	0.804
1981Q3	6.8645	8.412	1.5475	6.3305	8.6884	2.3579	6.6299	8.495	1.8651	6.6931	8.201	1.5078	7.2297	8.2432	1.0135
1981Q4	7.5757	9.535	1.9593	6.7617	8.273	1.5113	6.8147	8.1178	1.3032	6.7071	8.141	1.4338	6.6514	8.5974	1.946
1982Q1	5.9395	7.1859	1.2464	6.0437	7.4735	1.4298	6.0437	7.574	1.5303	6.619	8.0098	1.3908	6.7366	7.726	0.9894
1982Q2	4.6352	5.8704	1.2352	4.5707	6.3599	1.7892	5.9127	7.4993	1.5866	5.4094	6.5934	1.1839	5.0598	6.3124	1.2525
1982Q3	5.9434	6.8606	0.9172	5.8379	6.4543	0.6164	5.5609	6.1639	0.603	5.4899	6.468	0.9781	5.5671	6.371	0.8039
1982Q4	4.0861	5.4836	1.3975	4.4299	5.6174	1.1876	4.9491	5.7457	0.7966	5.0802	6.019	0.9389	5.4105	6.4899	1.0794
1983Q1	3.7536	4.638	0.8845	4.2939	5.6519	1.358	4.4514	5.6737	1.2223	4.7719	5.9727	1.2009	3.7033	5.5931	1.8898
1983Q2	3.2248	4.769	1.5442	3.6696	5.1018	1.4321	4.2067	5.512	1.3053	4.45	5.746	1.296	4.1975	5.6517	1.4542
1983Q3	3.7696	4.7284	0.9588	4.1087	5.2546	1.1459	4.3466	5.5646	1.2179	4.3039	5.675	1.371	4.3511	5.8764	1.5252
1983Q4	3.847	5.3743	1.5273	4.4624	5.5931	1.1307	4.4335	5.5414	1.1079	4.9138	5.793	0.8792	4.8673	6.1024	1.2351
1984Q1	4.0887	5.0352	0.9465	4.0418	4.9772	0.9354	4.3749	5.4907	1.1158	4.6924	5.951	1.2587	4.9702	5.9058	0.9356
1984Q2	3.6693	4.9887	1.3193	4.5499	5.4907	0.9408	4.6987	5.793	1.0943	5.3204	5.7078	0.3874	5.2505	6.3167	1.0661
1984Q3	3.2784	4.2032	0.9248	3.6228	5.083	1.4602	4.4487	5.035	0.5863	4.268	5.6523	1.3844	4.3921	5.6275	1.2354
1984Q4	3.6195	4.5314	0.9118	3.5871	4.6629	1.0758	3.5631	4.9746	1.4115	3.6766	5.2736	1.597	4.0126	5.5567	1.5441
1985Q1	2.9525	3.7706	0.8182	3.1983	3.7396	0.5413	3.5162	4.7735	1.2573	4.0249	5.0756	1.0507	3.4855	5.0305	1.545
1985Q2	3.18	3.7172	0.5373	3.4931	4.3959	0.9028	3.4855	4.8666	1.3811	3.6368	5.1691	1.5324	3.7491	5.1163	1.3672
1985Q3	2.6263	3.8711	1.2448	3.487	4.3614	0.8744	3.4704	5.0196	1.5492	3.7716	5.1404	1.3688	3.8937	5.0751	1.1814
1985Q4	3.2224	3.6718	0.4493	3.2805	4.335	1.0544	3	4.0387	1.0387	3.404	4.4305	1.0266	3.617	4.9814	1.3645
1986Q1	2.8621	3.5871	0.725	2.8417	3.5552	0.7135	2.8217	3.5552	0.7335	3.1618	4.21	1.0481	3.4629	4.8985	1.4356
1986Q2	1.0596	2.3065	1.2469	2.1173	3.3597	1.2424	2.818	4.0248	1.2069	3.1439	3.839	0.6951	3.118	4.1374	1.0194
1986Q3	0.527	2.4745	1.9475	1.7605	3.173	1.4124	1.9289	3.1618	1.2329	2.7704	3.6723	0.9019	2.7561	3.9885	1.2324
1986Q4	1.5745	3.1674	1.5928	2.4453	3.5131	1.0678	2.4304	3.4931	1.0627	2.5867	3.7927	1.2059	2.9071	3.9251	1.018
1987Q1	2.4507	3.5177	1.067	3.1343	3.8307	0.6964	3.118	4.1445	1.0265	3.0939	4.4609	1.367	3.4011	4.0881	0.687
1987Q2	3.481	4.1952	0.7143	3.448	4.1517	0.7037	3.0833	4.1196	1.0364	3.3752	4.095	0.7198	3.6863	4.3783	0.6921
1987Q3	3.4569	4.1589	0.702	3.7716	4.4648	0.6932	3.7427	4.4343	0.6916	3.3667	4.3746	1.0079	3.6526	4.6543	1.0017
1987Q4	2.7419	3.4391	0.6972	3.0675	3.4185	0.351	3.0365	3.73	0.6935	3.347	3.6924	0.3454	3.3303	4.6235	1.2932
1988Q1	2.7232	3.7587	1.0354	3.3867	3.73	0.3433	3.3752	4.0365	0.6613	3.6648	4.3345	0.6698	3.9665	5.2881	1.3217
1988Q2	3.3924	4.0811	0.6887	3.347	4.0467	0.6997	3.347	4.6504	1.3034	3.3192	4.635	1.3158	3.5871	4.6121	1.025
1988Q3	3.3498	4.717	1.3672	3.6587	4.6698	1.0111	3.6136	4.9232	1.3096	3.9115	4.9232	1.0117	3.5552	4.8359	1.2807
1988Q4	3.9829	4.6581	0.6752	3.9437	4.9353	0.9917	3.9083	4.8831	0.9748	3.5409	4.5191	0.9782	3.8334	4.7705	0.9371
1989Q1	3.6018	4.6007	0.999	3.9052	4.8791	0.974	3.8674	5.1437	1.2763	4.1215	5.0824	0.9609	4.4315	5.5069	1.0754
1989Q2	4.5484	5.2106	0.6622	4.1711	4.8204	0.6492	3.8061	4.763	0.9569	4.3846	5.0305	0.6458	3.8906	5.1205	1.2299
1989Q3	3.5381	4.5191	0.981	3.8243	4.4686	0.6443	3.7821	5.0743	1.2923	3.7467	4.6885	0.9419	3.7119	4.9297	1.2178
1989Q4	3.187	4.4901	1.3031	3.1643	4.4367	1.2724	3.1518	4.4019	1.25	3.4439	4.6703	1.2264	3.4145	4.8883	1.4738
1990Q1	3.4821	4.4473	0.9652	3.4493	4.0795	0.6302	3.4172	4.0541	0.6369	3.6919	4.6164	0.9245	3.9675	4.5847	0.6172
1990Q2	3.4358	4.0699	0.6341	3.7177	4.3337	0.6161	3.6778	4.6164	0.9386	3.9524	4.8846	0.9322	3.6032	4.5055	0.9023
1990Q3	3.709	4.663	0.954	3.6806	4.6129	0.9323	3.9255	4.5603	0.6347	3.8787	4.21	0.3313	3.2882	4.3108	1.0226
1990Q4	3.9949	5.5628	1.5679	3.9554	5.4824	1.527	3.6168	4.5191	0.9023	3.2699	4.1754	0.9055	3.2434	4.403	1.1596
1991Q1	3.347	5.5202	2.1732	3.0141	4.5191	1.505	2.9916	3.8816	0.89	2.6754	3.8443	1.1689	2.9562	3.8245	0.8683
1991Q2	2.996	3.9108	0.9147	2.976	3.87	0.8941	2.9475	3.8415	0.894	3.222	3.8245	0.6025	2.9281	4.037	1.1089
1991Q3	2.9716	3.5737	0.6022	2.6577	3.5526	0.8949	3.2173	3.8189	0.6016	3.1847	3.78	0.5953	3.0332	3.6048	0.5716
1991Q4	2.061	3.253	1.1919	2.644	3.5239	0.8799	2.6247	3.2173	0.5926	2.8693	3.4729	0.6036	2.602	3.7259	1.1239
1992Q1	2.3961	3.099	0.7029	2.3839	3.0649	0.681	2.3698	3.5008	1.131	2.6822	3.3582	0.6761	3.001	3.6678	0.6668
1992Q2	2.3778	3.3994	1.0216	2.7026	3.3752	0.6727	2.6867	3.3639	0.6772	3.0061	3.6709	0.6648	2.9713	3.6285	0.6572
1992Q3	2.344	2.6906	0.3467	2.3303	3.0035	0.6732	2.6511	3.3082	0.6572	2.3054	3.1984	0.8931	2.2922	3.2757	0.9836
1992Q4	2.1994	2.8012	0.6018	2.3187	3.2988	0.98	2.4985	3.2973	0.7988	2.2978	3.2624	0.9646	2.5931	3.2784	0.6854
1993Q1	2.3207	3.3006	0.9799	2.3054	2.9713	0.6659	2.5007	3.2757	0.775	2.597	3.3988	0.8018	2.5006	3.5495	1.0489
1993Q2	2.2978	3.2946	0.9968	2.4003	3.265	0.8648	2.5931	3.2465	0.6534	2.5836	3.6225	1.0388	2.5712	3.6685	1.0973
1993Q3	2.2828	3	0.7172	2.6	3.2491	0.6491	2.6	3.3	0.7	2.564	3.5	0.936	2.5416	3.4862	0.9446
1993Q4	2.268	2.9986	0.7306	2.3021	3.236	0.9339	2.3017	3.398	1.0963	2.5003	3.507	1.0068	2.5275	3.4003	0.8728
1994Q1	2.2607	3.2412	0.9805	2.248	2.8925	0.6445	2.2337	2.9993	0.7656	2.5315	3.0167	0.4852	2.5265	3.303	0.7764
1994Q2	2.2462	2.8949	0.6487	2.5517	2.9013	0.3496	2.5416	3.1693	0.6278	2.7988	3.1982	0.3994	2.8005	3.4278	0.6273
1994Q3	2.566	3.2152	0.6492	2.5476	3.1921	0.6444	2.8356	3.4793	0.6437	2.8	3.1469	0.3469	2.7949	3.4212	0.6263
1994Q4	2.4285	3.2023	0.7738	2.8299	3.5001	0.6701	2.8196	3.4724	0.6528	2.8062	3.4426	0.6364	2.7873	3.4132	0.6259
1995Q1	2.3496	3.5098	1.1603	2.5265	2.9998	0.4733	2.5569	3.1432	0.5863	2.5476	3.153	0.6055	2.7819	3.3957	0.6138
1995Q2	2.5315	3.1718	0.6403	2.5156	3.2008	0.6852	2.496	3.4007	0.9047	2.7959	3.4092	0.6133	2.7532	3.3804	0.6272
1995Q3	1.8882	2.8008	0.9126	2.1951	2.8245	0.6293	2.496	3.1175	0.6215	2.434	3.1541	0.7201	2.1596	3.0673	0.9077
1995Q4	1.4105	2.2494	0.839	2.173	2.5087	0.3357	1.8684	2.4921	0.6237	1.854	2.5989	0.7449	1.9973	2.9014	0.9041
1996Q1	2.149	2.6057	0.4567	1.9248	2.5937	0.6689	2.2028	2.7516	0.5488	2.1937	2.9564	0.7627	2.1917	2.8931	0.7014
1996Q2	2.216	2.7981	0.5821	2.2058	2.7996	0.5938	2.2981	2.6991	0.401	2.5012	2.9089	0.4077	2.5002	2.8879	0.3877
1996Q3	2.1003	2.6016	0.5014	2.1957	2.7001	0.5044	2.5003	2.9142	0.4139	2.4007	2.8905	0.4898	2.1582	2.9002	0.742
1996Q4	2.1977	2.5675	0.3698	2.1877	2.9169	0.7292	2.1758	2.9063	0.7305	2.1621	2.8853	0.7232	2.3504	3.1091	0.7587
1997Q1	1.819	2.5535	0.7345	2.1978	2.5419	0.344	2.1987	2.8827	0.684	2.2028	2.9978	0.795	2.4833	2.8999	0.4167
1997Q2	2.0253	2.5729	0.5477	2.1601	2.5235	0.3634	2.2889	2.685	0.3961	2.3835	2.9006	0.5171	2.2997	2.9012	0.6015
1997Q3	1.9034	2.2656	0.3622	2.1447	2.51	0.3653	2.139	2.7811	0.6421	2.1276	2.6001	0.4725	2.2924	2.795	0.5026
1997Q4	1.8015	2.2015	0.4	2.1352	2.4965	0.3614	2.1201	2.4833	0.3632	1.9404	2.5031	0.5627	2.0997	2.797	0.6974
1998Q1	1.744	2.1695	0.4255	1.7754	2.1285	0.3532	1.832	2.202	0.3701	1.9017	2.4311	0.5295	2.1008	2.5974	0.4965
1998Q2	1.3123	1.7769	0.4646	1.5989	2.098	0.4991	1.7675	2.1869	0.4193	2.0004	2.4507	0.4502	1.9007	2.4421	0.5414
1998Q3	0.8198	1.6986	0.8788	1.4247	2.1079	0.6832	1.7754	2.3012	0.5258	1.7444	2.4002	0.6558	1.7025	2.4571	0.7546
1998Q4	1.0341	1.7849	0.7507	1.4222	1.8912	0.469	1.4172	2.1257	0.7085	1.5142	2.1163	0.6021	1.6047	2.2071	0.6024
1999Q1	0.9581	1.4581	0.5	1.0624	1.5992	0.5367	1.1984	1.7691	0.5706	1.2019	1.9995	0.7976	1.3998	2.1479	0.7481
1999Q2	0.9552	1.56	0.6048	1.2703	1.7644	0.4941	1.4097	2.1107	0.7011	1.4993	2.1983	0.699	1.3998	2.096	0.6962
1999Q3	1.4109	1.8374	0.4265	1.4405	2.1107	0.6702	1.7002	2.107	0.4069	1.7018	2.096	0.3942	1.7353	2.1995	0.4642
1999Q4	1.2319	2.0077	0.7757	1.4973	2.3032	0.8059	1.5296	1.986	0.4564	1.5252	2.2061	0.6808	1.4062	2.3499	0.9437
2000Q1	1.4987	2.1517	0.653	1.5267	2.0602	0.5335	1.5209	1.9995	0.4787	1.5151	2.2748	0.7597	1.7502	2.2609	0.5107
2000Q2	2.0561	2.4403	0.3842	1.8018	2.392	0.5903	1.8841	2.5223	0.6383	1.8788	2.6228	0.744	1.8022	2.6106	0.8084
2000Q3	1.8859	2.418	0.5321	2.0012	2.5021	0.5009	2.1633	2.6206	0.4573	1.9985	2.5011	0.5025	2.0007	2.5004	0.4997
2000Q4	1.7631	2.5205	0.7573	2.2001	2.6547	0.4546	2.1577	2.6033	0.4456	2.0011	2.4998	0.4988	1.8983	2.3975	0.4992
2001Q1	2.0005	2.4005	0.3999	1.8578	2.2325	0.3746	1.8544	2.3007	0.4463	1.6924	2.4982	0.8058	1.8289	2.5012	0.6722
2001Q2	2.0003	2.6411	0.6408	1.6991	2.5016	0.8025	1.8357	2.5793	0.7437	1.8239	2.2009	0.3769	1.5658	2.2026	0.6368
2001Q3	1.3853	2.0139	0.6287	1.8348	2.2068	0.372	1.8256	2.2613	0.4357	1.8198	2.2986	0.4788	1.8795	2.5002	0.6208
2001Q4	0.4744	1.8007	1.3263	1.4847	2.3035	0.8187	1.3442	2.1857	0.8416	1.1593	2.1869	1.0276	1.3681	2.1719	0.8038
2002Q1	1.3003	2.0569	0.7566	1.1696	2.1034	0.9339	1.0853	2.1798	1.0945	1.0904	2.2084	1.118	1.7	2.4227	0.7227
2002Q2	1.3521	2.1626	0.8105	1.3047	2.1887	0.884	1.4772	2.2887	0.8115	1.7032	2.2975	0.5943	1.6913	2.5002	0.8089
2002Q3	1.1018	2.3378	1.236	1.1968	1.8339	0.6371	1.4842	2.5075	1.0233	1.5021	2.1621	0.6599	1.6151	2.3931	0.778
2002Q4	1.1968	2.0006	0.8038	1.5926	2.1738	0.5812	1.3317	2.164	0.8323	1.4285	2.1524	0.7238	1.4337	2.1972	0.7636
2003Q1	1.5185	2.2061	0.6875	1.3505	2.166	0.8154	1.433	1.9862	0.5531	1.4285	2.0853	0.6568	1.7793	2.1728	0.3935
2003Q2	1.2925	2.2011	0.9085	1.2991	1.829	0.5299	1.4672	2.1374	0.6702	1.7785	2.1718	0.3933	1.4197	2.0986	0.6789
2003Q3	1.0993	1.7227	0.6234	1.1065	2.0987	0.9923	1.4996	2.2398	0.7402	1.4122	2.1986	0.7864	1.406	2.0384	0.6325
2003Q4	1.1409	1.8949	0.754	1.4991	2.0007	0.5015	1.2322	2.1333	0.901	1.3008	2.1145	0.8136	1.401	2.2061	0.8051
2004Q1	1.1998	1.7866	0.5868	1.0977	1.7002	0.6025	1.1257	1.7994	0.6737	1.2487	1.9378	0.6891	1.4019	2.0022	0.6004
2004Q2	1.4652	2.4045	0.9393	1.2816	2.2245	0.943	1.3238	2.2716	0.9478	1.7023	2.5431	0.8408	1.4791	2.2139	0.7348
2004Q3	1.5997	2.388	0.7882	1.6974	2.5961	0.8987	1.8978	2.5459	0.6481	1.6887	2.8299	1.1412	1.5992	2.626	1.0268
2004Q4	1.3709	2.1927	0.8218	1.701	2.5426	0.8416	1.6618	2.2183	0.5565	1.7018	2.2016	0.4998	1.7495	2.3984	0.6489
2005Q1	1.8088	2.2555	0.4467	1.7979	2.2171	0.4192	1.6677	2.3018	0.6342	1.798	2.2974	0.4995	1.8206	2.5327	0.712
2005Q2	1.9996	2.7914	0.7918	1.9709	2.4222	0.4513	1.843	2.5018	0.6588	2.0981	2.6999	0.6018	1.8029	2.3084	0.5055
2005Q3	1.9458	2.4302	0.4845	2.0017	2.7024	0.7007	2.143	2.7435	0.6005	1.9978	2.6011	0.6033	1.8993	2.5884	0.6891
2005Q4	2.2983	3.0016	0.7033	2.1029	2.9313	0.8284	1.9991	2.7467	0.7476	1.9611	2.8143	0.8531	1.9991	2.6976	0.6985
2006Q1	2.0972	2.7832	0.686	1.9997	2.5316	0.5318	1.9887	2.4845	0.4958	2.0192	2.5247	0.5055	2.0878	2.6391	0.5513
2006Q2	2.4	3	0.6	1.9	2.9	1	1.966	2.8044	0.8384	2.1	2.9832	0.8832	1.7561	2.5258	0.7697
2006Q3	2.4	3.0363	0.6363	2.2	3.0748	0.8748	2.3212	3.1046	0.7833	2.0951	2.9	0.8049	2.0747	2.8648	0.7901
2006Q4	1.4984	2.5035	1.0051	2.3	3	0.7	2.1	2.6255	0.5255	2.0557	2.4068	0.3511	2.0304	2.5	0.4696
2007Q1	1.8788	2.8004	0.9216	1.9265	2.3966	0.4701	1.9701	2.352	0.3819	1.9228	2.4108	0.488	2	2.4891	0.4891
2007Q2	2.1563	3.3	1.1437	1.8239	2.6029	0.7791	1.9551	2.4217	0.4666	2.2	2.6844	0.4844	1.9933	2.423	0.4297
2007Q3	1.105	2.6917	1.5867	1.7799	2.5192	0.7393	2.15	2.6889	0.5389	1.9999	2.5	0.5001	1.9842	2.4952	0.511
2007Q4	1.6049	2.5	0.8951	2.114	2.9734	0.8594	1.9	2.4606	0.5606	1.9867	2.5156	0.5289	1.9672	2.4217	0.4545
2008Q1	2.005	2.7898	0.7848	1.9651	2.6	0.6349	1.7895	2.5128	0.7232	1.7931	2.4	0.6069	1.9489	2.6185	0.6696
2008Q2	1.9904	3	1.0096	2.1	2.8117	0.7117	2	2.6015	0.6015	2.2	2.7155	0.5155	1.9536	2.5	0.5464
2008Q3	2.0162	3.553	1.5368	2.2	2.9787	0.7787	2.1	2.6999	0.5999	1.6991	2.4799	0.7807	1.8737	2.5246	0.6509
2008Q4	1.8142	3.2732	1.459	1.8132	2.6023	0.7891	1	2.4	1.4	1.3289	2.3	0.9711	1.5981	2.4	0.8019
2009Q1	0	1.6961	1.6961	0.0177	1.3	1.2823	0.9	1.9136	1.0136	0.6452	1.9186	1.2735	1.1	2.2552	1.1552
2009Q2	0.0457	1.5	1.4543	0.6472	1.9354	1.2882	0.6788	1.8121	1.1333	1.034	2.0129	0.9789	0.8757	2.0075	1.1318
2009Q3	1.0244	2.1221	1.0977	0.7293	1.8273	1.098	1.0934	1.9	0.8066	0.7266	2.015	1.2884	1.4	2.2	0.8
2009Q4	0.9635	1.8228	0.8593	0.8757	1.8286	0.9528	0.8	1.8173	1.0173	1.1	1.9468	0.8468	1.2024	2.2	0.9976
2010Q1	1.0574	2.1951	1.1378	0.7633	1.55	0.7867	1.15	1.7759	0.6259	1.1857	1.8157	0.63	1.4453	2.1563	0.7109
2010Q2	0.9476	1.7	0.7524	1.2	1.819	0.619	1.2117	1.814	0.6023	1.2027	2.105	0.9023	1.2049	1.9	0.6951
2010Q3	0.9871	1.8085	0.8214	0.9	1.8139	0.9139	1.1	1.9	0.8	1	1.8042	0.8042	1.0738	1.818	0.7442
2010Q4	0.8002	1.8	0.9998	1.1	2.1	1	1	2.1	1.1	1.0748	2	0.9252	1.0719	2.1257	1.0538
2011Q1	1.1433	2	0.8567	1	1.7	0.7	1.0247	1.8	0.7753	0.9725	1.7913	0.8188	1.0823	2.1147	1.0325
2011Q2	1.5	2.6963	1.1963	1.2255	2.4941	1.2686	1.088	1.9	0.812	1.4209	2.1333	0.7124	1.2052	2.4	1.1948
2011Q3	1.3	2.356	1.056	1.4	2.3826	0.9826	1.5	2.4745	0.9745	1.4122	2.4	0.9878	1.5	2.3	0.8
2011Q4	1.4489	2.4	0.9511	1.4777	2.5	1.0223	1.35	2.3	0.95	1.3745	2.4	1.0255	1.3937	2.3932	0.9995
2012Q1	1.4	2.3372	0.9372	1.4	2.1145	0.7145	1.6	2.3623	0.7623	1.4	2.3	0.9	1.4517	2.4231	0.9714
2012Q2	1.4	2.1483	0.7483	1.7	2.1033	0.4033	1.5	2.2508	0.7508	1.6	2.4	0.8	1.5571	2.4	0.8429
2012Q3	1.5737	1.926	0.3522	1.5121	2.0923	0.5803	1.6472	2.154	0.5068	1.5085	2.1556	0.6471	1.7189	2.4064	0.6875
2012Q4	1.4	2	0.6	1.6483	2.1	0.4517	1.7	2.203	0.503	1.8855	2.4001	0.5146	1.7507	2.2207	0.47
2013Q1	1.3273	2.1555	0.8282	1.7	2.2182	0.5182	1.7424	2.1691	0.4267	1.5939	2.0583	0.4643	1.7345	2.3	0.5655
2013Q2	1.3	1.9	0.6	1.4594	2.1978	0.7384	1.4706	2.0408	0.5702	1.5463	2.106	0.5597	1.6962	2.3	0.6038
2013Q3	1.5	2.2791	0.7791	1.4648	1.8859	0.4211	1.5085	2.0976	0.5891	1.4887	2.0265	0.5378	1.5142	2.295	0.7808
2013Q4	1.4	2.2	0.8	1.6	1.9931	0.3931	1.5085	2	0.4915	1.6485	2.1341	0.4856	1.6478	2.2	0.5522
2014Q1	1.5035	2.018	0.5146	1.4967	1.8735	0.3768	1.5197	2.1566	0.637	1.5625	1.9759	0.4134	1.8	2.0943	0.2943
2014Q2	1.4411	2.1063	0.6652	1.5	2.0141	0.5141	1.564	2.0829	0.5189	1.6626	2.0001	0.3376	1.53	2.1	0.57
2014Q3	1.5809	2.1292	0.5484	1.6265	2.0545	0.4281	1.6994	2.1678	0.4684	1.6214	2.1944	0.5729	1.6077	2.1887	0.581
2014Q4	1.2953	2.0036	0.7084	1.6025	2	0.3975	1.65	2.2058	0.5558	1.6504	2.0162	0.3658	1.71	2.1877	0.4777
2015Q1	0.2	1.4768	1.2768	1.1075	1.9841	0.8766	1.2	2.0668	0.8668	1.3	1.9	0.6	1.4652	2.0322	0.567
2015Q2	1.1102	2	0.8898	1.3717	2.0582	0.6865	1.4	2	0.6	1.4749	1.9561	0.4812	1.4074	2.2	0.7926
2015Q3	1.2773	2.0151	0.7378	1.2814	1.9726	0.6912	1.4074	2.0117	0.6044	1.7	2.2	0.5	1.6278	2.1	0.4722
2015Q4	0.9971	1.7	0.7029	1.4229	1.9053	0.4824	1.5087	2.1623	0.6537	1.5557	2.0968	0.5412	1.6256	2.1005	0.4749
2016Q1	0.7	1.3	0.6	1.4543	1.9709	0.5167	1.4854	2	0.5146	1.5263	2	0.4737	1.5887	2.0503	0.4616
2016Q2	1.2551	1.8407	0.5856	1.348	1.8432	0.4952	1.5582	2.1065	0.5483	1.6313	2.1011	0.4698	1.7605	2.2	0.4395
2016Q3	1.3504	1.8233	0.4729	1.547	2.1877	0.6408	1.615	2.1709	0.5559	1.8176	2.2904	0.4728	1.8043	2.1342	0.3299
2016Q4	1.5363	2.0503	0.5139	1.6439	2.1355	0.4916	1.7945	2.1441	0.3496	1.7812	2.0224	0.2412	1.7696	2.1874	0.4179
2017Q1	1.6494	2.2464	0.5969	1.8216	2.4077	0.5861	1.8508	2.1923	0.3415	2.0017	2.4084	0.4067	1.9493	2.3957	0.4464
2017Q2	1.5541	2.1141	0.5599	1.8122	2.2214	0.4093	1.8751	2.23	0.3549	1.9	2.4043	0.5043	1.9745	2.4223	0.4479
2017Q3	1.28	1.8887	0.6087	1.6617	2.2	0.5383	1.7	2.2	0.5	1.7582	2.2538	0.4956	1.8	2.1645	0.3645
2017Q4	1.5932	1.9901	0.3968	1.7	2.1522	0.4522	1.7551	2.0384	0.2833	1.834	2.1059	0.2719	1.8573	2.1515	0.2942
2018Q1	1.7357	2.1876	0.452	1.7109	2.3	0.5891	1.9761	2.3433	0.3672	2	2.366	0.366	1.9834	2.4217	0.4383
2018Q2	1.6783	2.1	0.4217	1.9993	2.224	0.2247	2	2.3	0.3	1.9881	2.4252	0.4371	2	2.4085	0.4085
2018Q3	2.0245	2.4	0.3755	2	2.5	0.5	2.1	2.5327	0.4327	2.1	2.5235	0.4235	2.0154	2.5055	0.49
2018Q4	1.8259	2.4446	0.6187	2.025	2.5396	0.5146	2.1025	2.519	0.4165	1.9375	2.3199	0.3824	1.9483	2.4616	0.5133
2019Q1	1.5455	2.323	0.7775	1.9632	2.5281	0.5649	1.9359	2.3199	0.384	1.9636	2.3189	0.3553	1.8452	2.3663	0.521
2019Q2	1.7981	2.6517	0.8536	1.8265	2.1677	0.3413	1.845	2.1505	0.3054	1.8097	2.139	0.3293	1.84	2.2422	0.4022
2019Q3	1.7254	2.2772	0.5518	1.8611	2.1767	0.3157	1.8465	2.1352	0.2887	1.8403	2.1328	0.2925	1.7902	2.2926	0.5025
2019Q4	1.6204	2.0693	0.4489	1.7083	2.1	0.3917	1.8403	2.244	0.4037	1.7597	2.1126	0.3529	1.8	2.1566	0.3566
2020Q1	1.497	2.0221	0.5251	1.7088	2.1299	0.4211	1.7406	2.07	0.3294	1.8152	2.1117	0.2965	1.7389	2.0997	0.3608
2020Q2	-0.9996	1.6986	2.6982	0.659	1.7787	1.1197	1.0605	2	0.9395	1.2617	2.0151	0.7533	1.5351	2	0.4649
2020Q3	0.6502	2.5908	1.9406	0.6438	2	1.3562	0.9	1.8	0.9	1.2054	1.9136	0.7082	1.4074	2	0.5926
2020Q4	1.2634	2.0551	0.7917	1.6924	2.3092	0.6169	1.593	2.0722	0.4791	1.6763	2.076	0.3997	1.7383	2.059	0.3206
2021Q1	1.7109	2.3985	0.6876	1.718	2.4549	0.7369	1.7756	2.3	0.5244	1.7884	2.3712	0.5828	1.8	2.2	0.4
2021Q2	1.9245	3.2936	1.3691	2.0892	2.989	0.8997	2.0339	2.6929	0.659	1.9506	2.6255	0.6748	2.0338	2.4162	0.3824
2021Q3	2.5015	4.5	1.9985	2.1	3.3687	1.2687	2	2.9	0.9	2	2.9937	0.9937	2.0117	2.6254	0.6138
2021Q4	2.7462	4.4694	1.7232	2.466	3.7	1.234	2.2	3.0279	0.8279	2.0626	2.6794	0.6169	2.0915	2.7	0.6085

## Sheet: CPROF
Measures of Cross-Sectional Dispersion for Quarterly Forecasts for NOMINAL CORP PROF AFTER TAXES (CPROF)
Units: Annualized Percentage Points
Dispersion Measure D2 = 75th Percentile Minus 25th Percentile of the Forecasts for Q/Q Growth
P25 = 25th Percentile of the Forecasts for Q/Q Growth
P75 = 75th Percentile of the Forecasts for Q/Q Growth
At Each Survey Date T, the Quarterly Horizons Are T, T+1, T+2, T+3, and T+4
Survey_Date(T)	CPROF_P25_D2(T)	CPROF_P75_D2(T)	CPROF_D2(T)	CPROF_P25_D2(T+1)	CPROF_P75_D2(T+1)	CPROF_D2(T+1)	CPROF_P25_D2(T+2)	CPROF_P75_D2(T+2)	CPROF_D2(T+2)	CPROF_P25_D2(T+3)	CPROF_P75_D2(T+3)	CPROF_D2(T+3)	CPROF_P25_D2(T+4)	CPROF_P75_D2(T+4)	CPROF_D2(T+4)
1968Q4	-3.1074	8.0768	11.1843	-7.7632	3.9212	11.6844	-3.8839	8.0768	11.9607	3.9878	10.859	6.8712	3.7771	12.7456	8.9685
1969Q1	-11.5591	0	11.5591	-7.4732	1.9108	9.384	0	12.8581	12.8581	0	10.9701	10.9701	#N/A	#N/A	#N/A
1969Q2	-7.2369	4.2064	11.4433	-8.9503	0	8.9503	-7.5796	3.96	11.5396	-5.9352	7.9962	13.9314	#N/A	#N/A	#N/A
1969Q3	-7.6155	0	7.6155	-7.9168	0	7.9168	-7.7632	8.2432	16.0064	-3.9796	7.9171	11.8967	#N/A	#N/A	#N/A
1969Q4	-13.632	-7.7632	5.8688	-14.3402	0	14.3402	-10.7846	0	10.7846	0	17.7376	17.7376	6.2454	18.1389	11.8934
1970Q1	-15.6536	-6.3724	9.2812	-15.2463	-4.1445	11.1018	1.6096	18.5588	16.9491	8.5974	18.5588	9.9614	#N/A	#N/A	#N/A
1970Q2	-12.9113	-3.333	9.5782	0	9.6319	9.6319	4.1879	14.0149	9.827	5.1272	10.6577	5.5305	5.6954	14.7912	9.0958
1970Q3	-0.8948	9.4615	10.3563	3.6527	9.7506	6.098	5.0207	16.2492	11.2285	5.6545	17.5456	11.891	4.1835	15.9177	11.7342
1970Q4	-15.7182	0.884	16.6022	8.9833	30.5734	21.5901	8.2432	17.7376	9.4944	0	8.9833	8.9833	8.2773	16.6334	8.356
1971Q1	14.1803	33.0026	18.8223	8.8836	19.37	10.4863	-3.5395	9.4055	12.945	8.4166	18.5588	10.1422	7.9962	16.9859	8.9897
1971Q2	9.8916	28.0821	18.1905	-4.04	11.9527	15.9927	8.5974	28.8799	20.2825	8.1668	16.6334	8.4665	8.7861	20.2954	11.5093
1971Q3	8.8836	28.7517	19.8681	8.5974	22.0238	13.4264	7.6971	24.5121	16.815	7.7971	22.0584	14.2613	7.6157	16.6964	9.0806
1971Q4	8.095	17.6553	9.5603	8.7861	22.0949	13.3087	8.2179	19.5208	11.3029	8.3299	16.9859	8.656	8.1179	16.6334	8.5155
1972Q1	10.2049	21.0108	10.806	8.2773	22.8217	14.5444	8.0768	18.1389	10.062	8.7338	19.0165	10.2827	5.5399	14.7236	9.1836
1972Q2	14.1695	28.2387	14.0693	9.9696	19.7667	9.7971	8.0033	17.1291	9.1258	4.9657	14.5363	9.5706	3.643	10.754	7.111
1972Q3	12.294	23.5304	11.2364	8.6651	16.2952	7.6301	7.2044	17.896	10.6916	6.502	14.1137	7.6117	4.5782	10.8015	6.2233
1972Q4	13.6436	22.5453	8.9017	8.8022	15.2125	6.4102	7.2698	14.5231	7.2533	6.8352	11.9069	5.0717	3.3247	8.801	5.4763
1973Q1	10.6577	20.8055	10.1478	8.7065	14.7782	6.0717	5.2707	10.3813	5.1106	1.9818	9.0932	7.1115	0	8.7861	8.7861
1973Q2	8.9546	18.0572	9.1026	-4.1879	10.2049	14.3928	0	7.893	7.893	-5.9243	6.6094	12.5336	-6.1996	5.5931	11.7927
1973Q3	-7.2142	5.6724	12.8865	-10.7842	0	10.7842	-10.3804	0	10.3804	-5.3519	6.8645	12.2164	3.137	13.316	10.179
1973Q4	-8.1312	2.8267	10.9579	-21.2488	-2.8029	18.4459	-19.5837	0	19.5837	-3.0886	9.9512	13.0397	1.6961	13.0982	11.4022
1974Q1	-25.1506	-10.837	14.3135	-13.1785	-6.1292	7.0492	-1.6167	13.1522	14.7689	6.2239	19.3046	13.0806	6.1521	16.5646	10.4125
1974Q2	-11.2558	5.7129	16.9686	-5.7539	6.1051	11.859	0	6.1051	6.1051	2.7873	11.4176	8.6303	5.2978	13.0577	7.7599
1974Q3	-19.1391	0	19.1391	-20.5846	0	20.5846	-14.0119	2.8672	16.8791	0	9.5174	9.5174	#N/A	#N/A	#N/A
1974Q4	-54.3634	-19.1081	35.2553	-35.1345	-15.3539	19.7806	-23.9118	-5.4409	18.4709	0	18.5884	18.5884	9.4055	27.4429	18.0374
1975Q1	-41.3818	-20.438	20.9438	-24.7476	-8.2884	16.4592	-4.8184	24.4706	29.289	9.9238	31.781	21.8573	10.5051	29.2396	18.7345
1975Q2	-17.5087	7.2698	24.7785	7.1401	37.7363	30.5962	14.3926	46.41	32.0174	15.865	30.3428	14.4777	16.5191	27.4429	10.9239
1975Q3	14.5231	43.6194	29.0963	21.5506	36.4077	14.8571	18.0623	34.5051	16.4428	23.0783	33.5311	10.4528	12.1081	29.4538	17.3457
1975Q4	15.2875	32.2049	16.9174	15.6584	29.8178	14.1595	9.8694	22.7738	12.9044	10.3813	19.9434	9.5621	9.0853	19.8447	10.7594
1976Q1	8.522	22.4771	13.9551	14.0149	23.9337	9.9188	13.8534	23.9862	10.1329	13.2426	23.0462	9.8036	8.1592	16.9859	8.8267
1976Q2	16.517	31.0513	14.5343	14.269	23.6082	9.3392	13.6901	21.9094	8.2194	9.8223	17.7376	7.9152	7.9171	15.7121	7.7951
1976Q3	14.4185	22.7738	8.3552	14.0149	24.1436	10.1287	9.4055	18.776	9.3705	8.5515	14.3765	5.825	7.6157	13.6955	6.0797
1976Q4	8.2532	20.169	11.9158	9.4055	19.2914	9.8859	8.9097	13.8534	4.9437	4.8105	13.0982	8.2877	4.6235	11.8234	7.1999
1977Q1	4.5707	13.9812	9.4105	12.7266	27.4429	14.7164	9.4055	16.9859	7.5803	8.5606	16.2952	7.7346	4.4686	11.5827	7.1141
1977Q2	12.9172	29.0986	16.1814	8.3244	18.3464	10.022	11.3429	17.5435	6.2006	4.3709	13.17	8.7991	4.1879	12.7122	8.5242
1977Q3	3.9404	15.5069	11.5664	5.7156	20.043	14.3274	0	11.9278	11.9278	7.3365	14.8828	7.5463	3.5871	13.8934	10.3063
1977Q4	8.6651	20.8777	12.2126	3.7911	11.9278	8.1367	3.7555	11.4721	7.7166	3.5871	12.4211	8.834	3.2212	13.8934	10.6722
1978Q1	7.6889	15.9704	8.2815	3.8113	11.8208	8.0095	3.6694	11.2048	7.5354	0	20.7089	20.7089	-1.9137	10.7955	12.7091
1978Q2	11.6955	42.9983	31.3028	3.7555	14.1386	10.3832	0	13.9862	13.9862	-6.835	10.8502	17.6853	3.3192	10.9492	7.6299
1978Q3	3.6195	15.6584	12.0388	0	12.0474	12.0474	-7.3362	14.5231	21.8593	-3.791	9.335	13.1261	-4.4603	10.2049	14.6651
1978Q4	0	16.9859	16.9859	-3.076	16.1328	19.2088	-12.108	4.5941	16.702	-13.4517	4.0173	17.469	-9.3718	8.7962	18.168
1979Q1	3.0886	11.5271	8.4386	-6.5551	3.137	9.6921	-16.2896	0	16.2896	-15.6536	3.4332	19.0868	-9.3391	18.8808	28.2199
1979Q2	-13.0959	6.0589	19.1548	-15.0653	3.0886	18.1539	-16.1801	0	16.1801	-9.4049	15.0694	24.4743	5.0655	19.8614	14.7958
1979Q3	-18.8863	-10.3278	8.5585	-18.7688	-2.888	15.8807	-14.2657	4.2393	18.505	6.062	24.8124	18.7504	9.1896	24.7006	15.511
1979Q4	-19.9308	-8.5716	11.3592	-25.6534	-13.6785	11.9748	-11.4584	0	11.4584	4.5065	18.5985	14.0921	10.6236	19.398	8.7744
1980Q1	-9.4317	0	9.4317	-17.5636	-5.4646	12.099	-12.7323	9.4946	22.2269	0	13.6732	13.6732	7.1153	21.5506	14.4354
1980Q2	-29.2296	-12.2172	17.0124	-21.2488	-5.2276	16.0212	-14.8622	5.262	20.1243	0	12.4857	12.4857	8.3211	20.6272	12.306
1980Q3	-25.6534	-6.0588	19.5946	-8.0225	18.5588	26.5813	12.0173	37.7363	25.719	17.8694	30.1909	12.3216	14.1137	31.781	17.6673
1980Q4	8.4166	22.0584	13.6418	-2.7302	15.4174	18.1476	8.9166	26.202	17.2854	14.0149	23.9635	9.9485	14.1137	27.4429	13.3292
1981Q1	-27.6869	7.7635	35.4504	-2.3323	14.5231	16.8553	11.101	26.5367	15.4357	12.1448	24.892	12.7472	7.5677	18.9486	11.3809
1981Q2	-17.7298	4.8476	22.5774	-4.6961	14.0321	18.7282	11.366	24.2248	12.8589	0	19.5275	19.5275	10.9492	23.1682	12.219
1981Q3	-14.1096	6.5308	20.6404	11.0515	28.564	17.5125	7.0355	24.8066	17.7711	9.2427	27.6316	18.389	16.016	31.5732	15.5572
1981Q4	-24.1165	-6.8939	17.2226	-16.3292	5.4042	21.7334	4.8476	28.7517	23.9041	18.9344	47.8716	28.9373	17.1197	38.1337	21.014
1982Q1	-34.1383	-7.6155	26.5228	6.398	28.3019	21.9038	21.7173	44.5048	22.7876	15.7817	36.4249	20.6431	5.2277	22.351	17.1233
1982Q2	-18.6934	11.5929	30.2862	20.8055	49.4326	28.6271	10.7531	31.781	21.0279	0	25.8952	25.8952	7.9696	23.1491	15.1795
1982Q3	7.2044	35.1747	27.9703	9.7889	33.2392	23.4502	-3.3192	22.7738	26.093	10.2049	25.5151	15.3102	13.0982	26.7576	13.6594
1982Q4	0	20.9869	20.9869	-3.4931	18.5588	22.0519	13.316	25.0027	11.6867	10.2049	26.9822	16.7774	9.9512	28.525	18.5739
1983Q1	1.0088	22.5604	21.5516	6.7204	30.0032	23.2828	13.774	33.9238	20.1498	17.896	29.4538	11.5579	0	19.3033	19.3033
1983Q2	26.6625	51.9363	25.2738	23.1506	46.0604	22.9097	16.7906	31.8724	15.0818	5.8379	27.2363	21.3983	11.796	25.6882	13.8922
1983Q3	35.7293	62.7767	27.0474	18.9985	38.0329	19.0344	5.4782	19.6036	14.1254	14.9569	24.7823	9.8254	10.7291	23.8535	13.1244
1983Q4	18.0031	40.5835	22.5804	8.4166	23.1015	14.6849	11.4176	24.978	13.5605	10.1189	19.3255	9.2066	10.449	19.5782	9.1292
1984Q1	5.8808	21.2249	15.3441	11.9278	22.233	10.3052	10.8748	20.304	9.4292	9.6902	26.6734	16.9832	2.5077	12.9291	10.4214
1984Q2	5.4971	21.9978	16.5007	8.2432	22.4552	14.212	5.5543	13.2719	7.7176	3.5968	12.5252	8.9284	3.6244	16.198	12.5735
1984Q3	5.7432	15.0666	9.3234	5.1937	13.3604	8.1667	0	12.294	12.294	0	10.1189	10.1189	-4.968	9.6319	14.5998
1984Q4	-2.7302	11.0554	13.7856	0	11.4995	11.4995	0	20.0145	20.0145	2.6057	14.0149	11.4092	0	12.294	12.294
1985Q1	0	16.5911	16.5911	8.0768	22.3133	14.2364	5.262	19.0889	13.8269	2.5558	13.3604	10.8046	-4.6594	10.3813	15.0407
1985Q2	2.9091	15.0694	12.1603	4.8489	18.8406	13.9916	1.4133	15.267	13.8537	0	12.7102	12.7102	-2.5889	7.4273	10.0161
1985Q3	0	15.0776	15.0776	-2.9195	17.3469	20.2664	2.996	13.2702	10.2741	2.8336	12.0607	9.2271	0	12.2645	12.2645
1985Q4	2.7873	18.8496	16.0623	-1.1858	8.4166	9.6024	1.5116	8.9914	7.4798	4.0017	13.4508	9.4491	5.2462	15.2421	9.9959
1986Q1	0.2836	8.5974	8.3138	2.7396	20.5335	17.7939	2.7593	13.7293	10.97	0	12.2307	12.2307	-10.118	8.0768	18.1949
1986Q2	-2.8068	15.0694	17.8762	2.7117	23.1015	20.3898	5.8379	15.0694	9.2315	2.6057	11.9278	9.322	0	10.1832	10.1832
1986Q3	-2.8267	17.7948	20.6215	2.9738	36.0632	33.0894	-9.7485	7.1143	16.8627	1.9478	12.3352	10.3874	2.5396	13.1845	10.6449
1986Q4	5.6724	43.3657	37.6933	-19.9308	3.0649	22.9958	5.6724	14.5231	8.8507	8.6594	24.1436	15.4842	5.368	13.6333	8.2653
1987Q1	-10.6567	11.9278	22.5844	-2.8468	14.7368	17.5836	8.9833	21.4069	12.4235	0	14.9569	14.9569	-5.7539	11.4176	17.1714
1987Q2	-5.0623	11.101	16.1632	6.3473	13.7267	7.3795	2.9089	15.5393	12.6304	-10.3135	12.8461	23.1597	2.8068	14.5128	11.7059
1987Q3	6.0866	18.7031	12.6165	5.9419	14.7368	8.7949	-10.2475	16.2205	26.468	0	15.2794	15.2794	-3.5521	12.5722	16.1242
1987Q4	-7.6607	7.3678	15.0285	-10.1058	5.9243	16.0301	-1.498	5.8168	7.3148	-5.7118	11.9383	17.6502	-3.3321	12.5077	15.8398
1988Q1	-8.4162	14.5231	22.9393	-10.5862	-2.6401	7.9461	-8.1312	10.2049	18.3361	5.5543	17.3536	11.7993	-5.262	16.6334	21.8953
1988Q2	4.1805	13.778	9.5975	2.7302	13.0982	10.368	2.6401	14.0149	11.3748	-4.907	5.2969	10.2039	-5.2276	2.749	7.9766
1988Q3	-4.621	13.4598	18.0808	2.6489	12.8062	10.1573	-6.9328	8.5191	15.4519	-6.2116	4.9835	11.1951	-4.1689	4.8627	9.0316
1988Q4	3.9821	15.9704	11.9883	0	16.9859	16.9859	0	7.1614	7.1614	-4.4909	7.7635	12.2543	-1.7851	7.8013	9.5864
1989Q1	-6.6458	11.148	17.7938	-6.7581	7.0355	13.7936	-4.6235	6.9139	11.5374	-6.7963	6.7965	13.5928	-9.35	4.5191	13.8691
1989Q2	-1.4819	9.3586	10.8405	-5.1605	7.802	12.9625	-7.6238	8.0075	15.6313	-12.0941	1.173	13.2671	-6.835	4.7051	11.5401
1989Q3	-10.5846	4.6235	15.2081	-2.2662	12.1448	14.411	-4.519	6.954	11.473	-2.2791	6.1502	8.4293	0	8.5515	8.5515
1989Q4	-4.7895	13.0982	17.8878	-5.0979	8.187	13.2849	0	10.3675	10.3675	2.3598	17.3184	14.9587	4.8476	17.3001	12.4525
1990Q1	-2.6934	9.2694	11.9629	-6.3275	5.7539	12.0815	2.5722	11.0307	8.4585	2.8267	20.0487	17.222	0	15.6584	15.6584
1990Q2	-7.7632	7.5203	15.2835	2.6228	15.1645	12.5417	2.1798	4.3292	2.1495	-2.3187	4.6776	6.9963	-2.9302	4.2375	7.1677
1990Q3	0	9.8089	9.8089	-3.528	2.6057	6.1338	-9.9715	4.6776	14.6491	-2.3598	7.2919	9.6517	5.9043	20.4435	14.5392
1990Q4	-10.8004	4.8476	15.648	-23.878	-0.2435	23.6345	-12.5228	5.4511	17.9738	2.1984	10.9696	8.7712	4.2009	17.9647	13.7638
1991Q1	-32.4827	-1.8319	30.6508	-10.9882	4.8163	15.8045	4.7653	30.8835	26.1182	5.8341	32.1232	26.2891	6.0742	14.7007	8.6265
1991Q2	-11.2558	8.3648	19.6206	4.5191	34.8979	30.3788	4.597	31.781	27.1841	6.683	18.9814	12.2984	4.3472	17.1678	12.8206
1991Q3	4.557	24.4375	19.8805	7.1189	24.0988	16.9799	6.1238	18.1233	11.9995	6.25	18.6616	12.4116	4.7896	16.4526	11.663
1991Q4	2.7235	13.7606	11.0371	5.9648	24.0481	18.0833	6.3784	20.1704	13.792	6.7732	22.0418	15.2686	6.6605	18.1594	11.499
1992Q1	-2.0779	9.501	11.5788	6.2319	21.5506	15.3187	11.0012	27.7589	16.7576	10.2958	23.5764	13.2806	8.5606	21.5506	12.99
1992Q2	10.2246	42.8603	32.6357	14.933	29.1776	14.2446	13.9948	24.7597	10.7649	8.5115	20.8633	12.3518	5.6421	15.3598	9.7177
1992Q3	7.7103	20.3608	12.6505	8.7861	18.6608	9.8747	8.476	18.182	9.706	8.0768	16.9859	8.909	5.4452	15.9704	10.5253
1992Q4	10.2123	56.6237	46.4114	9.4866	18.6766	9.19	9.4651	18.0572	8.5921	6.7565	19.6225	12.866	5.4123	20.1987	14.7864
1993Q1	9.4866	28.0821	18.5955	9.6319	20.8872	11.2553	6.954	17.5415	10.5876	8.2945	15.5358	7.2413	2.8773	11.3776	8.5003
1993Q2	8.6345	20.4973	11.8628	10.8229	22.2614	11.4385	2.9492	15.748	12.7988	2.9518	14.8017	11.8499	4.3345	10.8435	6.509
1993Q3	6.2319	17.47	11.238	4.7877	16.8431	12.0553	1.9354	14.167	12.2316	4.286	11.9041	7.6182	3.5373	11.2874	7.7501
1993Q4	6.2209	19.4059	13.185	6.9172	14.6672	7.75	1.5436	12.1285	10.5849	4.4345	11.9278	7.4932	4.0604	8.1592	4.0988
1994Q1	2.7396	16.1602	13.4206	7.0843	23.5393	16.455	0.6893	11.0245	10.3352	-0.6733	7.9171	8.5903	-0.6898	6.9953	7.685
1994Q2	4.6188	27.2782	22.6594	4.947	15.7743	10.8273	2.8974	9.9501	7.0527	-0.7588	10.9991	11.7579	-0.6641	7.6278	8.2919
1994Q3	3.2205	14.3164	11.0959	2.9661	8.0498	5.0837	-2.7187	5.523	8.2418	1.2841	8.0691	6.785	1.6815	7.7514	6.0698
1994Q4	-1.712	7.9515	9.6635	-3.8491	6.4548	10.3039	0.5335	8.5157	7.9822	-0.5998	7.2829	7.8827	0.8933	7.1517	6.2584
1995Q1	-2.4829	10.1254	12.6083	0.6936	11.1514	10.4578	-3.0928	10.7593	13.8521	-3.1739	6.1591	9.333	-2.6489	9.92	12.5688
1995Q2	-2.8577	6.9648	9.8225	-0.1788	8.0633	8.2421	-0.9488	8.7717	9.7205	0.1676	7.1756	7.008	2.0068	8.2125	6.2057
1995Q3	-3.2126	10.7447	13.9573	2.3647	11.611	9.2463	0.756	12.4386	11.6826	2.8244	10.1631	7.3387	2.2941	9.1232	6.829
1995Q4	0	4.5761	4.5761	1.0403	7.5868	6.5465	2.1563	8.1426	5.9863	1.112	8.201	7.089	2.139	7.7321	5.5932
1996Q1	0.5897	9.1949	8.6052	3.0187	11.7993	8.7807	4.1237	11.5947	7.471	3.5773	9.4055	5.8283	1.2697	9.1896	7.9199
1996Q2	3.1535	10.1419	6.9884	-3.1504	6.9003	10.0507	-1.8239	5.8929	7.7168	1.2641	8.5161	7.252	0	7.1859	7.1859
1996Q3	-0.6384	6.7763	7.4148	-0.9673	7.6705	8.6378	1.5667	9.7003	8.1336	1.8823	7.2844	5.4021	0.4745	7.6589	7.1844
1996Q4	3.1477	9.2131	6.0654	-2.3645	7.6057	9.9702	1.5242	5.351	3.8267	-1.9928	5.413	7.4058	0	9.419	9.419
1997Q1	3.855	12.9399	9.085	0.7866	7.7635	6.9768	-2.9001	7.4735	10.3736	1.1337	6.1806	5.0469	1.6975	6.0255	4.328
1997Q2	-2.1489	8.4166	10.5655	-0.7812	6.7691	7.5504	-0.1447	6.7062	6.8509	0	6.2398	6.2398	-0.1901	5.6618	5.8519
1997Q3	2.8468	17.5435	14.6967	3.6395	12.2372	8.5978	1.7777	6.2273	4.4496	2.0693	6.7729	4.7036	-1.0736	5.887	6.9606
1997Q4	3.8241	9.636	5.8119	-0.1679	6.5958	6.7636	-1.6227	6.4888	8.1115	-3.0223	5.6954	8.7178	-2.077	4.7423	6.8193
1998Q1	-1.6449	5.0346	6.6795	-0.8667	6.5983	7.465	-0.1038	6.3949	6.4987	0.0496	5.6562	5.6066	0.9999	9.1568	8.1569
1998Q2	-0.6512	7.7481	8.3993	0.7498	4.5847	3.8349	-0.3999	5.9089	6.3087	0.3377	7.7635	7.4258	-2.8901	6.0393	8.9294
1998Q3	-4.9405	4.1445	9.085	-0.2693	6.1134	6.3827	0	7.6889	7.6889	-0.3395	2.5	2.8394	0	6.398	6.398
1998Q4	-1.0967	7.0945	8.1912	-4.1445	4.3577	8.5022	-1.6888	3.9717	5.6605	-3.1987	4.7738	7.9725	0	5.8927	5.8927
1999Q1	-1.6681	9.303	10.9712	-1.611	2.4414	4.0524	-4.1004	2.6803	6.7808	-1.2906	4.0035	5.2941	-1.0367	4.5191	5.5558
1999Q2	1.674	7.4392	5.7651	-3.0644	3.98	7.0445	-3.8597	3.6002	7.4598	-4.5421	2.7994	7.3415	-0.9275	6.2852	7.2127
1999Q3	0	7.2604	7.2604	-0.246	6.594	6.84	-7.4109	0.9615	8.3724	-0.8155	5.1898	6.0053	0.1917	6.9321	6.7404
1999Q4	-3.0668	9.8999	12.9667	-0.238	6.8291	7.067	2.1791	8.8602	6.6812	2.7538	11.5469	8.7931	-1.0576	9.0346	10.0921
2000Q1	-1.9032	6.8352	8.7384	-4.3585	4.9039	9.2624	-1.4933	6.3032	7.7965	-0.5434	3.3239	3.8673	1.2346	5.7069	4.4724
2000Q2	2.7465	9.8676	7.1211	-0.3534	6.7508	7.1043	-2.0447	6.7691	8.8138	0.1254	9.5775	9.4521	1.5861	6.1997	4.6136
2000Q3	-7.8808	8.8509	16.7317	-1.2698	7.2821	8.5519	-0.8296	10.9863	11.8159	0.6274	7.9999	7.3724	3.171	7.6472	4.4762
2000Q4	-0.6199	8.9115	9.5314	0.1882	7.5928	7.4046	2.1486	8.7404	6.5918	4.2982	7.3212	3.0229	5.2587	8.4435	3.1848
2001Q1	-10.2999	0.7603	11.0601	-4.1043	4.1044	8.2087	3.8779	8.3197	4.4419	3.8109	12.1604	8.3494	3.4288	12.294	8.8652
2001Q2	-5.593	1.9246	7.5176	-3.6903	7.7458	11.4361	-3.7579	13.1073	16.8652	5.7448	11.1707	5.4259	4.9297	12.1686	7.2389
2001Q3	-12.9081	0.3842	13.2923	-5.7946	13.84	19.6346	-0.7549	12.0486	12.8036	3.5389	16.3823	12.8434	0	13.7662	13.7662
2001Q4	-33.1483	-3.6395	29.5087	-10.0347	13.5804	23.6151	0.5667	22.9057	22.339	5.368	31.1784	25.8104	4.2331	24.8216	20.5885
2002Q1	0.6035	15.8871	15.2836	6.5586	19.4118	12.8531	2.2716	22.2683	19.9967	2.7999	24.4364	21.6365	3.1882	16.5587	13.3704
2002Q2	5.0001	25.2342	20.2341	3.8	10.942	7.1421	4.0638	17.1983	13.1345	7.7084	18.3125	10.6041	4.6088	16.5585	11.9497
2002Q3	5.9996	34.2661	28.2665	3.4621	14.0567	10.5947	7.0003	15.4635	8.4632	8.0768	15.8069	7.7301	6.9998	19.565	12.5652
2002Q4	2.724	9.9996	7.2755	6.108	16.7907	10.6828	5.1147	14.3047	9.19	6.1905	17.3482	11.1577	5.0773	17.6005	12.5232
2003Q1	7.5005	20.1713	12.6708	2.6171	14.2629	11.6458	6.1319	22.0305	15.8986	6.9239	19.0968	12.1729	6.1051	17.0442	10.9391
2003Q2	2.4589	9.9809	7.522	8.4061	14.6846	6.2785	9.0853	17.8168	8.7315	8.8836	16.8196	7.936	9.8523	16.3801	6.5278
2003Q3	8.8225	24.6875	15.865	3.4848	17.2966	13.8118	10.3604	17.1813	6.8209	6.2959	16.8048	10.5089	6.6291	15.1643	8.5352
2003Q4	6.819	22.2939	15.4749	5.933	17.5499	11.6168	5.5103	19.5356	14.0253	7.2188	16.2999	9.081	5.2969	19.4595	14.1626
2004Q1	11.8698	26.2671	14.3973	9.9998	19.1497	9.1498	8.7121	15	6.288	4.0003	15.2531	11.2528	6.1248	33.5996	27.4749
2004Q2	5.5106	29.6001	24.0896	4.0606	18.0469	13.9863	3.1223	20.0001	16.8777	9.9926	138.292	128.299	4.8871	11.3389	6.4518
2004Q3	-1.8533	13.9434	15.7967	2.9645	14.3822	11.4177	5.2779	135.542	130.264	1.3807	8.6603	7.2796	1.4039	9.2285	7.8246
2004Q4	9.5842	45.5817	35.9975	4.4438	48.4231	43.9794	2.6789	8.3628	5.6838	4.6601	10.5818	5.9217	4.7285	20.0003	15.2719
2005Q1	4.9956	96.7529	91.7573	4.5721	8.2084	3.6363	0.1916	5.4253	5.2337	1.6821	12.8675	11.1854	1.2935	8.2741	6.9805
2005Q2	4.6964	7.6207	2.9243	2.9117	7.675	4.7633	0.9464	6.7291	5.7827	-4.6146	7.4817	12.0963	2.9024	5.6386	2.7363
2005Q3	0	7.9999	7.9999	-1.49	14.3369	15.8269	-1.7925	12.2334	14.0259	-2.8677	6.0002	8.8678	-5.7128	5.7186	11.4313
2005Q4	4.597	74.5183	69.9214	-4.9071	10.6883	15.5954	-5.8662	8.2432	14.1094	-3.3138	8.2432	11.557	-2.9302	5.9999	8.9301
2006Q1	4.1811	13.1123	8.9312	0.2002	10.4421	10.2419	-5.0737	5.7723	10.846	0.5979	7.567	6.9692	1.1202	8.243	7.1228
2006Q2	3.8291	13.1116	9.2826	-3.7418	5.5414	9.2832	-2.5752	8.506	11.0812	0.0853	5.5264	5.4411	1.7204	8.2432	6.5228
2006Q3	-11.6842	5.8659	17.5501	-0.4419	10.6144	11.0563	1.8627	9.3096	7.4469	2.4218	6.6361	4.2143	2.0392	8.4203	6.3811
2006Q4	0.5213	9.0678	8.5465	2.4593	9.1229	6.6636	2.0923	7.1319	5.0396	1.2392	5.9817	4.7425	3.2241	7	3.7759
2007Q1	3.4509	12.294	8.8431	1.9909	8	6.0091	3.3306	9.1794	5.8488	2.6935	8.445	5.7515	3.1744	8.0793	4.905
2007Q2	-0.8055	6.8066	7.612	3.9546	9.9202	5.9656	3.7909	8.6277	4.8368	4.1429	8.5916	4.4488	2.6657	7.6359	4.9701
2007Q3	-5.0895	7	12.0895	1.8174	7.1062	5.2887	3.3554	5.8799	2.5245	2.8575	7.0225	4.165	0.9187	5.892	4.9733
2007Q4	-3.2807	6.7727	10.0534	1.1728	9.4461	8.2732	2.0517	9.769	7.7173	1.4654	6.2239	4.7585	2.015	5.9908	3.9757
2008Q1	-5.8886	4.4909	10.3795	-3.8396	16.5617	20.4013	-3.1278	10.4885	13.6163	0	7.5567	7.5567	2.7786	10.2916	7.513
2008Q2	-3.4249	16.0074	19.4324	-0.7197	15.7662	16.4859	-5.367	9.2131	14.58	0.3834	10.6906	10.3071	5.0838	13.955	8.8712
2008Q3	0	19.597	19.597	-9.9868	4.4731	14.4599	-0.4804	8.2432	8.7237	-0.7048	8.2432	8.9481	0	9.5	9.5
2008Q4	-11.7742	9.3568	21.1309	-14.0534	13.9238	27.9773	-3.8127	8.7472	12.5599	2.6203	16.2197	13.5995	3.272	12.5955	9.3234
2009Q1	-20.1882	-0.5529	19.6352	-10.6981	3.6979	14.396	-3.294	16.1803	19.4743	-0.4929	7.3967	7.8897	2.877	14.8813	12.0044
2009Q2	-19.8578	5.3023	25.1601	-3.9404	11.6792	15.6196	0	9.0373	9.0373	3.5317	14.8991	11.3675	6.1364	16.6132	10.4768
2009Q3	1.4	16.7446	15.3446	1.4	14.012	12.612	5.9685	18.9168	12.9483	6.4	21.0973	14.6973	4.7525	15.6664	10.9139
2009Q4	2.0887	19.7796	17.6909	3.9324	16.0088	12.0765	1.6434	13.675	12.0316	3.921	14.205	10.284	4.6288	12.6641	8.0353
2010Q1	0.6182	16.0923	15.4741	-0.7625	11.4176	12.1801	3.9493	11.6733	7.724	4.2258	13.0549	8.8291	1.3811	10	8.6189
2010Q2	4.68	17.2194	12.5394	1.7175	18.3524	16.6349	2.9149	13.0982	10.1833	2.3245	13.8189	11.4943	4.3989	11.3943	6.9955
2010Q3	4.7	13.8574	9.1574	4.9128	12.8875	7.9747	4.7896	12.9605	8.1709	0	8.5082	8.5082	5.9927	13.6045	7.6119
2010Q4	-2.3528	10	12.3528	3.3991	9.1776	5.7784	3.5807	7.7607	4.18	4.0623	11.5153	7.453	2.0112	10.2951	8.2839
2011Q1	4.1932	15.225	11.0318	2.6931	9.9751	7.2819	2.0246	9.6971	7.6725	1.7412	7.8885	6.1473	1.6852	10.0988	8.4136
2011Q2	4.8288	13.9944	9.1657	3.549	11.3006	7.7516	4.0087	7.7275	3.7188	-2.8796	9.2025	12.0821	2.5097	8.9859	6.4762
2011Q3	-2.9511	7.6124	10.5635	0.1598	6.5286	6.3688	2.0463	7.9	5.8537	1.3071	6.9333	5.6261	0.8133	8.219	7.4057
2011Q4	1.9988	14.5357	12.537	0.6391	7.7311	7.0919	2.0724	8.5591	6.4867	-1.0829	6.8148	7.8977	2.1212	8.6498	6.5286
2012Q1	2.5428	9.5	6.9572	2.2096	9.0917	6.8821	2.7386	9.1021	6.3635	0.3295	8.5397	8.2102	-3.3981	8.6361	12.0342
2012Q2	2.567	15.5659	12.9988	1.271	9.4937	8.2227	0.7588	7.5677	6.8089	0.7573	8.8874	8.1301	0.5035	7.2919	6.7884
2012Q3	-0.5669	6.0486	6.6155	2.019	7.2456	5.2266	-2.6278	9.1233	11.7512	0.1051	7.9798	7.8747	2.8228	8.4896	5.6667
2012Q4	2.6	9.662	7.062	-5.9312	7.4077	13.3389	1.6669	7.763	6.0961	2.1696	6.6567	4.4871	3.7876	9.5957	5.8081
2013Q1	1.3355	12.1	10.7645	0.7102	6.1364	5.4262	3.235	8.9174	5.6824	2.1177	7.9874	5.8696	1.7438	8.8	7.0562
2013Q2	-4.6213	7.3	11.9213	2.7628	8.7402	5.9774	4.4758	8	3.5242	2.0725	7.6	5.5275	4.5	6.5298	2.0298
2013Q3	3.1589	7.2593	4.1003	3.0039	6.5189	3.515	2.8577	7.9309	5.0732	4.6123	7.1964	2.5841	4.4852	6.7055	2.2203
2013Q4	-0.3011	6.2783	6.5794	3.8131	7.6369	3.8238	4.0604	7.5336	3.4732	2.1462	7.1944	5.0481	2.7428	6.4606	3.7177
2014Q1	-2.3528	7.8194	10.1722	1.8129	7.985	6.1721	3.9354	8.03	4.0946	2.8507	7.2399	4.3891	2.8581	7.7255	4.8673
2014Q2	5.757	10.3508	4.5939	4.489	7.8147	3.3257	4.2666	7.694	3.4274	5.0945	8.694	3.5995	4.8128	8	3.1872
2014Q3	2.8151	8.9988	6.1838	2.6595	6.7279	4.0684	2.6194	9.049	6.4296	4.5576	9.1	4.5424	3.5447	8.7936	5.2489
2014Q4	3.1024	9.3072	6.2048	0.8314	9.6115	8.7801	4.5	9.9216	5.4216	3.8652	8.1187	4.2535	1.4335	6.7522	5.3187
2015Q1	2.0538	9.5985	7.5446	4.5	16.0596	11.5596	3.0478	8.6682	5.6204	1.2365	10.0406	8.8042	1.5066	7.3152	5.8087
2015Q2	1.2841	24.7683	23.4842	3.8718	14.3162	10.4444	3.4506	11.0375	7.587	0.5063	8.5605	8.0542	4.4514	7.1202	2.6688
2015Q3	2.4999	15.1508	12.6509	1.148	10.7221	9.5741	1.1855	11.264	10.0785	3.2386	12.8275	9.5889	1.5153	7	5.4847
2015Q4	1.1791	14.7585	13.5794	1.2381	9.7648	8.5267	2.5912	7.5814	4.9903	1.3437	6.6915	5.3478	1.507	6.5662	5.0593
2016Q1	-1.2838	7.4216	8.7054	2.7117	7.5526	4.8409	0.828	6.8352	6.0072	2.0151	7.1732	5.1582	1.5258	7.2651	5.7393
2016Q2	-2.0281	14.4555	16.4836	2.9195	8.4433	5.5238	0.8406	10.179	9.3384	2.7836	9.4	6.6164	4	8.211	4.211
2016Q3	1.2181	7.627	6.4089	1.533	6.89	5.357	2.0743	5.9648	3.8905	2.8201	6.6816	3.8615	0.7835	4.5701	3.7865
2016Q4	2.0111	10.4439	8.4328	2.4217	6.6159	4.1942	2.5402	8.5	5.9598	2.0083	6.3738	4.3656	1.2375	8.488	7.2505
2017Q1	2.2404	10.9771	8.7366	3	10.1658	7.1658	1.7004	7.7066	6.0062	3	8.8517	5.8517	3	18.452	15.452
2017Q2	3.726	10.3929	6.6669	2.2564	7	4.7436	3.6597	8.9817	5.322	1.6654	11.2513	9.5859	3.821	9.789	5.968
2017Q3	2.8	10.3717	7.5717	2.5267	10.8266	8.2999	2.005	9.3849	7.38	1.6893	9.4333	7.744	3.4672	7.7	4.2328
2017Q4	2.3459	11.0926	8.7467	-0.3191	6.4	6.7191	1.3769	6.2	4.8231	1.1425	5.9	4.7575	1.6758	6.2114	4.5356
2018Q1	7.9049	15.0258	7.1209	1.1	12.503	11.403	4.3257	10.2154	5.8897	3.1263	7.9343	4.808	3.6651	9.6559	5.9908
2018Q2	4.1561	8.6873	4.5312	4.2435	9.4111	5.1676	3.4773	7.9796	4.5022	0.9071	7.2528	6.3457	2.6876	6.0434	3.3557
2018Q3	-0.1995	8.4452	8.6447	0.5029	9.7733	9.2703	2.9532	9.1159	6.1627	1.6812	5.9707	4.2895	1.8215	5.517	3.6956
2018Q4	2.6655	10.9398	8.2744	3.5289	9.1783	5.6494	2.2532	8.8766	6.6234	2.7808	5.8802	3.0993	1.607	5.7989	4.1919
2019Q1	-1.7312	5.7956	7.5268	2.3828	6.9229	4.54	2.2186	5.598	3.3794	1.2817	5.3	4.0183	1.3065	5.8148	4.5084
2019Q2	1.9277	10	8.0723	2.769	5.0637	2.2947	1.2434	4.7532	3.5097	1.0329	4.9736	3.9407	0	5	5
2019Q3	-1.34	6.5334	7.8734	-0.0131	5.4827	5.4958	-1.261	5	6.261	-0.8954	5	5.8954	1.56	6.9983	5.4383
2019Q4	0.0056	5	4.9944	-11.4001	4.8864	16.2865	-0.0779	7.4	7.4779	0.5009	8.1	7.5991	0.6665	8.9564	8.2899
2020Q1	-0.8861	6.1332	7.0193	0.8998	6.4747	5.5748	0.9622	7.7219	6.7597	0	7.644	7.644	1.2054	7.3242	6.1187
2020Q2	-60.3147	-26.187	34.1276	-1	59.2922	60.2922	-4.7061	38.0261	42.7321	5.823	42.0288	36.2058	4.5765	23.8366	19.2601
2020Q3	7.9062	60.854	52.9478	3.576	22.0093	18.4333	4.958	15.1964	10.2385	4.5765	12.3325	7.756	3.137	11.0733	7.9363
2020Q4	-47.0449	21.4186	68.4636	4.0335	14.3309	10.2973	4.1932	10.6884	6.4952	5.7667	15.2149	9.4481	2.9176	9.1234	6.2057
2021Q1	4.4727	23.7157	19.243	3.9154	26.859	22.9436	5.1671	14.9462	9.7791	3.7747	10.6959	6.9212	4	10.6203	6.6203
2021Q2	8.6617	27.0413	18.3797	1.8749	12.8504	10.9755	4.4	10.8154	6.4154	3.9337	10.0682	6.1346	3.6284	6.5765	2.9481
2021Q3	3.1534	14.0579	10.9045	1.5421	7.6	6.0579	0.5	8.1167	7.6167	3.245	11.5526	8.3076	2.4261	6.8105	4.3844
2021Q4	-15.3539	10.3525	25.7064	2.2	9.0724	6.8724	2.2	9.7976	7.5976	1.139	6.6637	5.5246	-0.3994	5.1114	5.5108

## Sheet: EMP
Measures of Cross-Sectional Dispersion for Quarterly Forecasts for NONFARM PAYROLL EMPLOYMENT (EMP)
Units: Annualized Percentage Points
Dispersion Measure D2 = 75th Percentile Minus 25th Percentile of the Forecasts for Q/Q Growth
P25 = 25th Percentile of the Forecasts for Q/Q Growth
P75 = 75th Percentile of the Forecasts for Q/Q Growth
At Each Survey Date T, the Quarterly Horizons Are T, T+1, T+2, T+3, and T+4
Survey_Date(T)	EMP_P25_D2(T)	EMP_P75_D2(T)	EMP_D2(T)	EMP_P25_D2(T+1)	EMP_P75_D2(T+1)	EMP_D2(T+1)	EMP_P25_D2(T+2)	EMP_P75_D2(T+2)	EMP_D2(T+2)	EMP_P25_D2(T+3)	EMP_P75_D2(T+3)	EMP_D2(T+3)	EMP_P25_D2(T+4)	EMP_P75_D2(T+4)	EMP_D2(T+4)
1968Q4	#N/A	#N/A	#N/A	#N/A	#N/A	#N/A	#N/A	#N/A	#N/A	#N/A	#N/A	#N/A	#N/A	#N/A	#N/A
1969Q1	#N/A	#N/A	#N/A	#N/A	#N/A	#N/A	#N/A	#N/A	#N/A	#N/A	#N/A	#N/A	#N/A	#N/A	#N/A
1969Q2	#N/A	#N/A	#N/A	#N/A	#N/A	#N/A	#N/A	#N/A	#N/A	#N/A	#N/A	#N/A	#N/A	#N/A	#N/A
1969Q3	#N/A	#N/A	#N/A	#N/A	#N/A	#N/A	#N/A	#N/A	#N/A	#N/A	#N/A	#N/A	#N/A	#N/A	#N/A
1969Q4	#N/A	#N/A	#N/A	#N/A	#N/A	#N/A	#N/A	#N/A	#N/A	#N/A	#N/A	#N/A	#N/A	#N/A	#N/A
1970Q1	#N/A	#N/A	#N/A	#N/A	#N/A	#N/A	#N/A	#N/A	#N/A	#N/A	#N/A	#N/A	#N/A	#N/A	#N/A
1970Q2	#N/A	#N/A	#N/A	#N/A	#N/A	#N/A	#N/A	#N/A	#N/A	#N/A	#N/A	#N/A	#N/A	#N/A	#N/A
1970Q3	#N/A	#N/A	#N/A	#N/A	#N/A	#N/A	#N/A	#N/A	#N/A	#N/A	#N/A	#N/A	#N/A	#N/A	#N/A
1970Q4	#N/A	#N/A	#N/A	#N/A	#N/A	#N/A	#N/A	#N/A	#N/A	#N/A	#N/A	#N/A	#N/A	#N/A	#N/A
1971Q1	#N/A	#N/A	#N/A	#N/A	#N/A	#N/A	#N/A	#N/A	#N/A	#N/A	#N/A	#N/A	#N/A	#N/A	#N/A
1971Q2	#N/A	#N/A	#N/A	#N/A	#N/A	#N/A	#N/A	#N/A	#N/A	#N/A	#N/A	#N/A	#N/A	#N/A	#N/A
1971Q3	#N/A	#N/A	#N/A	#N/A	#N/A	#N/A	#N/A	#N/A	#N/A	#N/A	#N/A	#N/A	#N/A	#N/A	#N/A
1971Q4	#N/A	#N/A	#N/A	#N/A	#N/A	#N/A	#N/A	#N/A	#N/A	#N/A	#N/A	#N/A	#N/A	#N/A	#N/A
1972Q1	#N/A	#N/A	#N/A	#N/A	#N/A	#N/A	#N/A	#N/A	#N/A	#N/A	#N/A	#N/A	#N/A	#N/A	#N/A
1972Q2	#N/A	#N/A	#N/A	#N/A	#N/A	#N/A	#N/A	#N/A	#N/A	#N/A	#N/A	#N/A	#N/A	#N/A	#N/A
1972Q3	#N/A	#N/A	#N/A	#N/A	#N/A	#N/A	#N/A	#N/A	#N/A	#N/A	#N/A	#N/A	#N/A	#N/A	#N/A
1972Q4	#N/A	#N/A	#N/A	#N/A	#N/A	#N/A	#N/A	#N/A	#N/A	#N/A	#N/A	#N/A	#N/A	#N/A	#N/A
1973Q1	#N/A	#N/A	#N/A	#N/A	#N/A	#N/A	#N/A	#N/A	#N/A	#N/A	#N/A	#N/A	#N/A	#N/A	#N/A
1973Q2	#N/A	#N/A	#N/A	#N/A	#N/A	#N/A	#N/A	#N/A	#N/A	#N/A	#N/A	#N/A	#N/A	#N/A	#N/A
1973Q3	#N/A	#N/A	#N/A	#N/A	#N/A	#N/A	#N/A	#N/A	#N/A	#N/A	#N/A	#N/A	#N/A	#N/A	#N/A
1973Q4	#N/A	#N/A	#N/A	#N/A	#N/A	#N/A	#N/A	#N/A	#N/A	#N/A	#N/A	#N/A	#N/A	#N/A	#N/A
1974Q1	#N/A	#N/A	#N/A	#N/A	#N/A	#N/A	#N/A	#N/A	#N/A	#N/A	#N/A	#N/A	#N/A	#N/A	#N/A
1974Q2	#N/A	#N/A	#N/A	#N/A	#N/A	#N/A	#N/A	#N/A	#N/A	#N/A	#N/A	#N/A	#N/A	#N/A	#N/A
1974Q3	#N/A	#N/A	#N/A	#N/A	#N/A	#N/A	#N/A	#N/A	#N/A	#N/A	#N/A	#N/A	#N/A	#N/A	#N/A
1974Q4	#N/A	#N/A	#N/A	#N/A	#N/A	#N/A	#N/A	#N/A	#N/A	#N/A	#N/A	#N/A	#N/A	#N/A	#N/A
1975Q1	#N/A	#N/A	#N/A	#N/A	#N/A	#N/A	#N/A	#N/A	#N/A	#N/A	#N/A	#N/A	#N/A	#N/A	#N/A
1975Q2	#N/A	#N/A	#N/A	#N/A	#N/A	#N/A	#N/A	#N/A	#N/A	#N/A	#N/A	#N/A	#N/A	#N/A	#N/A
1975Q3	#N/A	#N/A	#N/A	#N/A	#N/A	#N/A	#N/A	#N/A	#N/A	#N/A	#N/A	#N/A	#N/A	#N/A	#N/A
1975Q4	#N/A	#N/A	#N/A	#N/A	#N/A	#N/A	#N/A	#N/A	#N/A	#N/A	#N/A	#N/A	#N/A	#N/A	#N/A
1976Q1	#N/A	#N/A	#N/A	#N/A	#N/A	#N/A	#N/A	#N/A	#N/A	#N/A	#N/A	#N/A	#N/A	#N/A	#N/A
1976Q2	#N/A	#N/A	#N/A	#N/A	#N/A	#N/A	#N/A	#N/A	#N/A	#N/A	#N/A	#N/A	#N/A	#N/A	#N/A
1976Q3	#N/A	#N/A	#N/A	#N/A	#N/A	#N/A	#N/A	#N/A	#N/A	#N/A	#N/A	#N/A	#N/A	#N/A	#N/A
1976Q4	#N/A	#N/A	#N/A	#N/A	#N/A	#N/A	#N/A	#N/A	#N/A	#N/A	#N/A	#N/A	#N/A	#N/A	#N/A
1977Q1	#N/A	#N/A	#N/A	#N/A	#N/A	#N/A	#N/A	#N/A	#N/A	#N/A	#N/A	#N/A	#N/A	#N/A	#N/A
1977Q2	#N/A	#N/A	#N/A	#N/A	#N/A	#N/A	#N/A	#N/A	#N/A	#N/A	#N/A	#N/A	#N/A	#N/A	#N/A
1977Q3	#N/A	#N/A	#N/A	#N/A	#N/A	#N/A	#N/A	#N/A	#N/A	#N/A	#N/A	#N/A	#N/A	#N/A	#N/A
1977Q4	#N/A	#N/A	#N/A	#N/A	#N/A	#N/A	#N/A	#N/A	#N/A	#N/A	#N/A	#N/A	#N/A	#N/A	#N/A
1978Q1	#N/A	#N/A	#N/A	#N/A	#N/A	#N/A	#N/A	#N/A	#N/A	#N/A	#N/A	#N/A	#N/A	#N/A	#N/A
1978Q2	#N/A	#N/A	#N/A	#N/A	#N/A	#N/A	#N/A	#N/A	#N/A	#N/A	#N/A	#N/A	#N/A	#N/A	#N/A
1978Q3	#N/A	#N/A	#N/A	#N/A	#N/A	#N/A	#N/A	#N/A	#N/A	#N/A	#N/A	#N/A	#N/A	#N/A	#N/A
1978Q4	#N/A	#N/A	#N/A	#N/A	#N/A	#N/A	#N/A	#N/A	#N/A	#N/A	#N/A	#N/A	#N/A	#N/A	#N/A
1979Q1	#N/A	#N/A	#N/A	#N/A	#N/A	#N/A	#N/A	#N/A	#N/A	#N/A	#N/A	#N/A	#N/A	#N/A	#N/A
1979Q2	#N/A	#N/A	#N/A	#N/A	#N/A	#N/A	#N/A	#N/A	#N/A	#N/A	#N/A	#N/A	#N/A	#N/A	#N/A
1979Q3	#N/A	#N/A	#N/A	#N/A	#N/A	#N/A	#N/A	#N/A	#N/A	#N/A	#N/A	#N/A	#N/A	#N/A	#N/A
1979Q4	#N/A	#N/A	#N/A	#N/A	#N/A	#N/A	#N/A	#N/A	#N/A	#N/A	#N/A	#N/A	#N/A	#N/A	#N/A
1980Q1	#N/A	#N/A	#N/A	#N/A	#N/A	#N/A	#N/A	#N/A	#N/A	#N/A	#N/A	#N/A	#N/A	#N/A	#N/A
1980Q2	#N/A	#N/A	#N/A	#N/A	#N/A	#N/A	#N/A	#N/A	#N/A	#N/A	#N/A	#N/A	#N/A	#N/A	#N/A
1980Q3	#N/A	#N/A	#N/A	#N/A	#N/A	#N/A	#N/A	#N/A	#N/A	#N/A	#N/A	#N/A	#N/A	#N/A	#N/A
1980Q4	#N/A	#N/A	#N/A	#N/A	#N/A	#N/A	#N/A	#N/A	#N/A	#N/A	#N/A	#N/A	#N/A	#N/A	#N/A
1981Q1	#N/A	#N/A	#N/A	#N/A	#N/A	#N/A	#N/A	#N/A	#N/A	#N/A	#N/A	#N/A	#N/A	#N/A	#N/A
1981Q2	#N/A	#N/A	#N/A	#N/A	#N/A	#N/A	#N/A	#N/A	#N/A	#N/A	#N/A	#N/A	#N/A	#N/A	#N/A
1981Q3	#N/A	#N/A	#N/A	#N/A	#N/A	#N/A	#N/A	#N/A	#N/A	#N/A	#N/A	#N/A	#N/A	#N/A	#N/A
1981Q4	#N/A	#N/A	#N/A	#N/A	#N/A	#N/A	#N/A	#N/A	#N/A	#N/A	#N/A	#N/A	#N/A	#N/A	#N/A
1982Q1	#N/A	#N/A	#N/A	#N/A	#N/A	#N/A	#N/A	#N/A	#N/A	#N/A	#N/A	#N/A	#N/A	#N/A	#N/A
1982Q2	#N/A	#N/A	#N/A	#N/A	#N/A	#N/A	#N/A	#N/A	#N/A	#N/A	#N/A	#N/A	#N/A	#N/A	#N/A
1982Q3	#N/A	#N/A	#N/A	#N/A	#N/A	#N/A	#N/A	#N/A	#N/A	#N/A	#N/A	#N/A	#N/A	#N/A	#N/A
1982Q4	#N/A	#N/A	#N/A	#N/A	#N/A	#N/A	#N/A	#N/A	#N/A	#N/A	#N/A	#N/A	#N/A	#N/A	#N/A
1983Q1	#N/A	#N/A	#N/A	#N/A	#N/A	#N/A	#N/A	#N/A	#N/A	#N/A	#N/A	#N/A	#N/A	#N/A	#N/A
1983Q2	#N/A	#N/A	#N/A	#N/A	#N/A	#N/A	#N/A	#N/A	#N/A	#N/A	#N/A	#N/A	#N/A	#N/A	#N/A
1983Q3	#N/A	#N/A	#N/A	#N/A	#N/A	#N/A	#N/A	#N/A	#N/A	#N/A	#N/A	#N/A	#N/A	#N/A	#N/A
1983Q4	#N/A	#N/A	#N/A	#N/A	#N/A	#N/A	#N/A	#N/A	#N/A	#N/A	#N/A	#N/A	#N/A	#N/A	#N/A
1984Q1	#N/A	#N/A	#N/A	#N/A	#N/A	#N/A	#N/A	#N/A	#N/A	#N/A	#N/A	#N/A	#N/A	#N/A	#N/A
1984Q2	#N/A	#N/A	#N/A	#N/A	#N/A	#N/A	#N/A	#N/A	#N/A	#N/A	#N/A	#N/A	#N/A	#N/A	#N/A
1984Q3	#N/A	#N/A	#N/A	#N/A	#N/A	#N/A	#N/A	#N/A	#N/A	#N/A	#N/A	#N/A	#N/A	#N/A	#N/A
1984Q4	#N/A	#N/A	#N/A	#N/A	#N/A	#N/A	#N/A	#N/A	#N/A	#N/A	#N/A	#N/A	#N/A	#N/A	#N/A
1985Q1	#N/A	#N/A	#N/A	#N/A	#N/A	#N/A	#N/A	#N/A	#N/A	#N/A	#N/A	#N/A	#N/A	#N/A	#N/A
1985Q2	#N/A	#N/A	#N/A	#N/A	#N/A	#N/A	#N/A	#N/A	#N/A	#N/A	#N/A	#N/A	#N/A	#N/A	#N/A
1985Q3	#N/A	#N/A	#N/A	#N/A	#N/A	#N/A	#N/A	#N/A	#N/A	#N/A	#N/A	#N/A	#N/A	#N/A	#N/A
1985Q4	#N/A	#N/A	#N/A	#N/A	#N/A	#N/A	#N/A	#N/A	#N/A	#N/A	#N/A	#N/A	#N/A	#N/A	#N/A
1986Q1	#N/A	#N/A	#N/A	#N/A	#N/A	#N/A	#N/A	#N/A	#N/A	#N/A	#N/A	#N/A	#N/A	#N/A	#N/A
1986Q2	#N/A	#N/A	#N/A	#N/A	#N/A	#N/A	#N/A	#N/A	#N/A	#N/A	#N/A	#N/A	#N/A	#N/A	#N/A
1986Q3	#N/A	#N/A	#N/A	#N/A	#N/A	#N/A	#N/A	#N/A	#N/A	#N/A	#N/A	#N/A	#N/A	#N/A	#N/A
1986Q4	#N/A	#N/A	#N/A	#N/A	#N/A	#N/A	#N/A	#N/A	#N/A	#N/A	#N/A	#N/A	#N/A	#N/A	#N/A
1987Q1	#N/A	#N/A	#N/A	#N/A	#N/A	#N/A	#N/A	#N/A	#N/A	#N/A	#N/A	#N/A	#N/A	#N/A	#N/A
1987Q2	#N/A	#N/A	#N/A	#N/A	#N/A	#N/A	#N/A	#N/A	#N/A	#N/A	#N/A	#N/A	#N/A	#N/A	#N/A
1987Q3	#N/A	#N/A	#N/A	#N/A	#N/A	#N/A	#N/A	#N/A	#N/A	#N/A	#N/A	#N/A	#N/A	#N/A	#N/A
1987Q4	#N/A	#N/A	#N/A	#N/A	#N/A	#N/A	#N/A	#N/A	#N/A	#N/A	#N/A	#N/A	#N/A	#N/A	#N/A
1988Q1	#N/A	#N/A	#N/A	#N/A	#N/A	#N/A	#N/A	#N/A	#N/A	#N/A	#N/A	#N/A	#N/A	#N/A	#N/A
1988Q2	#N/A	#N/A	#N/A	#N/A	#N/A	#N/A	#N/A	#N/A	#N/A	#N/A	#N/A	#N/A	#N/A	#N/A	#N/A
1988Q3	#N/A	#N/A	#N/A	#N/A	#N/A	#N/A	#N/A	#N/A	#N/A	#N/A	#N/A	#N/A	#N/A	#N/A	#N/A
1988Q4	#N/A	#N/A	#N/A	#N/A	#N/A	#N/A	#N/A	#N/A	#N/A	#N/A	#N/A	#N/A	#N/A	#N/A	#N/A
1989Q1	#N/A	#N/A	#N/A	#N/A	#N/A	#N/A	#N/A	#N/A	#N/A	#N/A	#N/A	#N/A	#N/A	#N/A	#N/A
1989Q2	#N/A	#N/A	#N/A	#N/A	#N/A	#N/A	#N/A	#N/A	#N/A	#N/A	#N/A	#N/A	#N/A	#N/A	#N/A
1989Q3	#N/A	#N/A	#N/A	#N/A	#N/A	#N/A	#N/A	#N/A	#N/A	#N/A	#N/A	#N/A	#N/A	#N/A	#N/A
1989Q4	#N/A	#N/A	#N/A	#N/A	#N/A	#N/A	#N/A	#N/A	#N/A	#N/A	#N/A	#N/A	#N/A	#N/A	#N/A
1990Q1	#N/A	#N/A	#N/A	#N/A	#N/A	#N/A	#N/A	#N/A	#N/A	#N/A	#N/A	#N/A	#N/A	#N/A	#N/A
1990Q2	#N/A	#N/A	#N/A	#N/A	#N/A	#N/A	#N/A	#N/A	#N/A	#N/A	#N/A	#N/A	#N/A	#N/A	#N/A
1990Q3	#N/A	#N/A	#N/A	#N/A	#N/A	#N/A	#N/A	#N/A	#N/A	#N/A	#N/A	#N/A	#N/A	#N/A	#N/A
1990Q4	#N/A	#N/A	#N/A	#N/A	#N/A	#N/A	#N/A	#N/A	#N/A	#N/A	#N/A	#N/A	#N/A	#N/A	#N/A
1991Q1	#N/A	#N/A	#N/A	#N/A	#N/A	#N/A	#N/A	#N/A	#N/A	#N/A	#N/A	#N/A	#N/A	#N/A	#N/A
1991Q2	#N/A	#N/A	#N/A	#N/A	#N/A	#N/A	#N/A	#N/A	#N/A	#N/A	#N/A	#N/A	#N/A	#N/A	#N/A
1991Q3	#N/A	#N/A	#N/A	#N/A	#N/A	#N/A	#N/A	#N/A	#N/A	#N/A	#N/A	#N/A	#N/A	#N/A	#N/A
1991Q4	#N/A	#N/A	#N/A	#N/A	#N/A	#N/A	#N/A	#N/A	#N/A	#N/A	#N/A	#N/A	#N/A	#N/A	#N/A
1992Q1	#N/A	#N/A	#N/A	#N/A	#N/A	#N/A	#N/A	#N/A	#N/A	#N/A	#N/A	#N/A	#N/A	#N/A	#N/A
1992Q2	#N/A	#N/A	#N/A	#N/A	#N/A	#N/A	#N/A	#N/A	#N/A	#N/A	#N/A	#N/A	#N/A	#N/A	#N/A
1992Q3	#N/A	#N/A	#N/A	#N/A	#N/A	#N/A	#N/A	#N/A	#N/A	#N/A	#N/A	#N/A	#N/A	#N/A	#N/A
1992Q4	#N/A	#N/A	#N/A	#N/A	#N/A	#N/A	#N/A	#N/A	#N/A	#N/A	#N/A	#N/A	#N/A	#N/A	#N/A
1993Q1	#N/A	#N/A	#N/A	#N/A	#N/A	#N/A	#N/A	#N/A	#N/A	#N/A	#N/A	#N/A	#N/A	#N/A	#N/A
1993Q2	#N/A	#N/A	#N/A	#N/A	#N/A	#N/A	#N/A	#N/A	#N/A	#N/A	#N/A	#N/A	#N/A	#N/A	#N/A
1993Q3	#N/A	#N/A	#N/A	#N/A	#N/A	#N/A	#N/A	#N/A	#N/A	#N/A	#N/A	#N/A	#N/A	#N/A	#N/A
1993Q4	#N/A	#N/A	#N/A	#N/A	#N/A	#N/A	#N/A	#N/A	#N/A	#N/A	#N/A	#N/A	#N/A	#N/A	#N/A
1994Q1	#N/A	#N/A	#N/A	#N/A	#N/A	#N/A	#N/A	#N/A	#N/A	#N/A	#N/A	#N/A	#N/A	#N/A	#N/A
1994Q2	#N/A	#N/A	#N/A	#N/A	#N/A	#N/A	#N/A	#N/A	#N/A	#N/A	#N/A	#N/A	#N/A	#N/A	#N/A
1994Q3	#N/A	#N/A	#N/A	#N/A	#N/A	#N/A	#N/A	#N/A	#N/A	#N/A	#N/A	#N/A	#N/A	#N/A	#N/A
1994Q4	#N/A	#N/A	#N/A	#N/A	#N/A	#N/A	#N/A	#N/A	#N/A	#N/A	#N/A	#N/A	#N/A	#N/A	#N/A
1995Q1	#N/A	#N/A	#N/A	#N/A	#N/A	#N/A	#N/A	#N/A	#N/A	#N/A	#N/A	#N/A	#N/A	#N/A	#N/A
1995Q2	#N/A	#N/A	#N/A	#N/A	#N/A	#N/A	#N/A	#N/A	#N/A	#N/A	#N/A	#N/A	#N/A	#N/A	#N/A
1995Q3	#N/A	#N/A	#N/A	#N/A	#N/A	#N/A	#N/A	#N/A	#N/A	#N/A	#N/A	#N/A	#N/A	#N/A	#N/A
1995Q4	#N/A	#N/A	#N/A	#N/A	#N/A	#N/A	#N/A	#N/A	#N/A	#N/A	#N/A	#N/A	#N/A	#N/A	#N/A
1996Q1	#N/A	#N/A	#N/A	#N/A	#N/A	#N/A	#N/A	#N/A	#N/A	#N/A	#N/A	#N/A	#N/A	#N/A	#N/A
1996Q2	#N/A	#N/A	#N/A	#N/A	#N/A	#N/A	#N/A	#N/A	#N/A	#N/A	#N/A	#N/A	#N/A	#N/A	#N/A
1996Q3	#N/A	#N/A	#N/A	#N/A	#N/A	#N/A	#N/A	#N/A	#N/A	#N/A	#N/A	#N/A	#N/A	#N/A	#N/A
1996Q4	#N/A	#N/A	#N/A	#N/A	#N/A	#N/A	#N/A	#N/A	#N/A	#N/A	#N/A	#N/A	#N/A	#N/A	#N/A
1997Q1	#N/A	#N/A	#N/A	#N/A	#N/A	#N/A	#N/A	#N/A	#N/A	#N/A	#N/A	#N/A	#N/A	#N/A	#N/A
1997Q2	#N/A	#N/A	#N/A	#N/A	#N/A	#N/A	#N/A	#N/A	#N/A	#N/A	#N/A	#N/A	#N/A	#N/A	#N/A
1997Q3	#N/A	#N/A	#N/A	#N/A	#N/A	#N/A	#N/A	#N/A	#N/A	#N/A	#N/A	#N/A	#N/A	#N/A	#N/A
1997Q4	#N/A	#N/A	#N/A	#N/A	#N/A	#N/A	#N/A	#N/A	#N/A	#N/A	#N/A	#N/A	#N/A	#N/A	#N/A
1998Q1	#N/A	#N/A	#N/A	#N/A	#N/A	#N/A	#N/A	#N/A	#N/A	#N/A	#N/A	#N/A	#N/A	#N/A	#N/A
1998Q2	#N/A	#N/A	#N/A	#N/A	#N/A	#N/A	#N/A	#N/A	#N/A	#N/A	#N/A	#N/A	#N/A	#N/A	#N/A
1998Q3	#N/A	#N/A	#N/A	#N/A	#N/A	#N/A	#N/A	#N/A	#N/A	#N/A	#N/A	#N/A	#N/A	#N/A	#N/A
1998Q4	#N/A	#N/A	#N/A	#N/A	#N/A	#N/A	#N/A	#N/A	#N/A	#N/A	#N/A	#N/A	#N/A	#N/A	#N/A
1999Q1	#N/A	#N/A	#N/A	#N/A	#N/A	#N/A	#N/A	#N/A	#N/A	#N/A	#N/A	#N/A	#N/A	#N/A	#N/A
1999Q2	#N/A	#N/A	#N/A	#N/A	#N/A	#N/A	#N/A	#N/A	#N/A	#N/A	#N/A	#N/A	#N/A	#N/A	#N/A
1999Q3	#N/A	#N/A	#N/A	#N/A	#N/A	#N/A	#N/A	#N/A	#N/A	#N/A	#N/A	#N/A	#N/A	#N/A	#N/A
1999Q4	#N/A	#N/A	#N/A	#N/A	#N/A	#N/A	#N/A	#N/A	#N/A	#N/A	#N/A	#N/A	#N/A	#N/A	#N/A
2000Q1	#N/A	#N/A	#N/A	#N/A	#N/A	#N/A	#N/A	#N/A	#N/A	#N/A	#N/A	#N/A	#N/A	#N/A	#N/A
2000Q2	#N/A	#N/A	#N/A	#N/A	#N/A	#N/A	#N/A	#N/A	#N/A	#N/A	#N/A	#N/A	#N/A	#N/A	#N/A
2000Q3	#N/A	#N/A	#N/A	#N/A	#N/A	#N/A	#N/A	#N/A	#N/A	#N/A	#N/A	#N/A	#N/A	#N/A	#N/A
2000Q4	#N/A	#N/A	#N/A	#N/A	#N/A	#N/A	#N/A	#N/A	#N/A	#N/A	#N/A	#N/A	#N/A	#N/A	#N/A
2001Q1	#N/A	#N/A	#N/A	#N/A	#N/A	#N/A	#N/A	#N/A	#N/A	#N/A	#N/A	#N/A	#N/A	#N/A	#N/A
2001Q2	#N/A	#N/A	#N/A	#N/A	#N/A	#N/A	#N/A	#N/A	#N/A	#N/A	#N/A	#N/A	#N/A	#N/A	#N/A
2001Q3	#N/A	#N/A	#N/A	#N/A	#N/A	#N/A	#N/A	#N/A	#N/A	#N/A	#N/A	#N/A	#N/A	#N/A	#N/A
2001Q4	#N/A	#N/A	#N/A	#N/A	#N/A	#N/A	#N/A	#N/A	#N/A	#N/A	#N/A	#N/A	#N/A	#N/A	#N/A
2002Q1	#N/A	#N/A	#N/A	#N/A	#N/A	#N/A	#N/A	#N/A	#N/A	#N/A	#N/A	#N/A	#N/A	#N/A	#N/A
2002Q2	#N/A	#N/A	#N/A	#N/A	#N/A	#N/A	#N/A	#N/A	#N/A	#N/A	#N/A	#N/A	#N/A	#N/A	#N/A
2002Q3	#N/A	#N/A	#N/A	#N/A	#N/A	#N/A	#N/A	#N/A	#N/A	#N/A	#N/A	#N/A	#N/A	#N/A	#N/A
2002Q4	#N/A	#N/A	#N/A	#N/A	#N/A	#N/A	#N/A	#N/A	#N/A	#N/A	#N/A	#N/A	#N/A	#N/A	#N/A
2003Q1	#N/A	#N/A	#N/A	#N/A	#N/A	#N/A	#N/A	#N/A	#N/A	#N/A	#N/A	#N/A	#N/A	#N/A	#N/A
2003Q2	#N/A	#N/A	#N/A	#N/A	#N/A	#N/A	#N/A	#N/A	#N/A	#N/A	#N/A	#N/A	#N/A	#N/A	#N/A
2003Q3	#N/A	#N/A	#N/A	#N/A	#N/A	#N/A	#N/A	#N/A	#N/A	#N/A	#N/A	#N/A	#N/A	#N/A	#N/A
2003Q4	0.5619	1.2062	0.6444	0.6772	1.6709	0.9938	0.9227	1.7473	0.8245	1.2298	1.8433	0.6135	1.1702	1.9327	0.7626
2004Q1	0.691	1.1216	0.4306	1.1717	1.7507	0.579	1.3597	2.0587	0.699	1.4009	1.9854	0.5845	1.5007	2.2242	0.7235
2004Q2	1.632	2.384	0.752	1.4365	2.0526	0.6161	1.5086	2.1375	0.6289	1.4204	2.0919	0.6715	1.6225	2.3175	0.6951
2004Q3	0.7708	1.7375	0.9667	1.5308	2.0007	0.4699	1.3408	2.0511	0.7103	1.5666	1.961	0.3944	1.34	2.1139	0.7739
2004Q4	1.2211	2.0121	0.791	1.3914	1.9964	0.605	1.4505	2.0525	0.6021	1.2997	1.9757	0.676	1.3214	1.8021	0.4807
2005Q1	1.3327	1.5623	0.2295	1.441	1.9162	0.4752	1.3664	1.8114	0.445	1.4006	2.0253	0.6248	1.3664	1.8462	0.4798
2005Q2	1.5911	2.1455	0.5544	1.3744	1.8711	0.4967	1.4716	1.8677	0.3961	1.3368	1.7956	0.4587	1.3975	1.745	0.3475
2005Q3	1.5077	1.8112	0.3035	1.5021	1.833	0.3309	1.3761	1.7977	0.4216	1.2815	1.7877	0.5061	1.1277	1.6913	0.5636
2005Q4	0.6764	1.0491	0.3727	1.4067	1.8449	0.4382	1.4186	1.8023	0.3837	1.3191	1.7044	0.3853	1.2074	1.6797	0.4722
2006Q1	1.3441	1.9199	0.5758	1.2557	1.791	0.5354	1.2487	1.717	0.4683	1.1852	1.6617	0.4765	1.0816	1.5635	0.4819
2006Q2	1.407	1.6382	0.2312	1.2627	1.6561	0.3933	1.0448	1.6	0.5553	1.017	1.5624	0.5454	1.019	1.5069	0.4879
2006Q3	0.9656	1.3	0.3344	0.9067	1.2633	0.3566	0.821	1.257	0.436	0.7222	1.2843	0.5621	0.9	1.3064	0.4064
2006Q4	0.8924	1.2474	0.3549	0.8918	1.2027	0.3109	0.6439	1.2065	0.5626	0.9086	1.2468	0.3382	0.8298	1.2313	0.4015
2007Q1	1.0235	1.3	0.2765	0.8531	1.3083	0.4552	0.881	1.2549	0.3739	0.8798	1.3282	0.4485	1	1.3228	0.3228
2007Q2	0.8756	1.203	0.3274	0.6986	1.1979	0.4994	0.8	1.1593	0.3593	0.9	1.2054	0.3054	0.99	1.3375	0.3475
2007Q3	0.8404	1.2632	0.4228	0.8285	1.1271	0.2986	0.8687	1.2548	0.3861	0.9032	1.2874	0.3842	0.9136	1.3241	0.4105
2007Q4	0.7927	1.0814	0.2886	0.5879	1.0048	0.4168	0.6884	1.0061	0.3176	0.8336	1.0913	0.2577	0.867	1.218	0.351
2008Q1	0.145	0.6	0.455	0.0212	0.609	0.5879	0.2	0.8368	0.6368	0.4	1.0051	0.6051	0.3721	1.1106	0.7385
2008Q2	-0.5672	-0.1768	0.3904	-0.3007	0.1153	0.4161	-0.0573	0.4772	0.5345	0.1081	0.8663	0.7581	0.2542	1.0019	0.7477
2008Q3	-0.73	-0.3	0.43	-0.6489	-0.1308	0.5181	-0.4578	0.3169	0.7747	-0.1543	0.5	0.6543	0.1523	0.7772	0.6249
2008Q4	-2.2405	-1.6092	0.6313	-2.0888	-1.2438	0.845	-1.5282	-0.7303	0.7979	-0.8759	-0.1556	0.7203	-0.3545	0.5621	0.9166
2009Q1	-4.9347	-4.0009	0.9338	-3.5	-2.0441	1.4559	-2.0909	-0.7	1.3909	-1	0	1	-0.0904	0.6283	0.7187
2009Q2	-4.9522	-4.0092	0.943	-2.8553	-2.0527	0.8025	-1.2672	0	1.2672	-0.4592	0.6728	1.1319	0.1624	1.5133	1.351
2009Q3	-2.718	-2.0052	0.7128	-1.2414	-0.4532	0.7882	-0.488	0.7776	1.2657	0.3924	1.7	1.3076	0.7691	1.6123	0.8432
2009Q4	-1.7838	-1.2251	0.5587	-0.7959	0.0917	0.8877	0.2	0.986	0.786	0.614	1.5845	0.9705	1.02	1.8345	0.8145
2010Q1	-0.2348	0.4628	0.6976	0.3599	1.583	1.2231	0.2387	1.21	0.9713	0.5367	1.6654	1.1286	1.0271	2.0503	1.0232
2010Q2	1.4424	2.4912	1.0488	0.6144	1.7	1.0856	1.0499	2.1105	1.0606	1.4361	2.3	0.8639	1.3896	2.4008	1.0112
2010Q3	-0.4257	0.8865	1.3122	0.739	1.358	0.619	0.9542	1.7119	0.7578	1.1967	2.1222	0.9254	1.3	2.376	1.076
2010Q4	0.4213	1.1106	0.6893	0.6456	1.3065	0.6609	0.9209	1.5662	0.6454	0.9969	1.8417	0.8447	1.2257	2.1	0.8743
2011Q1	1.0792	1.5522	0.473	1.2	1.913	0.713	1.2223	2	0.7777	1.4235	2.4164	0.9929	1.4553	2.2	0.7447
2011Q2	1.2964	2.1209	0.8245	1.3288	2.1156	0.7869	1.3551	2.14	0.7849	1.4402	2.11	0.6698	1.3847	2.1913	0.8066
2011Q3	0.7748	1.3904	0.6157	1.0091	1.6842	0.6751	0.9918	1.6725	0.6808	0.9116	1.8122	0.9006	0.8886	1.8652	0.9766
2011Q4	0.7224	1.2385	0.5161	0.848	1.3875	0.5395	0.9401	1.5972	0.6571	0.9315	1.4142	0.4827	0.8636	1.4769	0.6133
2012Q1	1.2	1.8002	0.6002	1.2	1.5258	0.3258	1.1742	1.5463	0.3721	1.2208	1.7529	0.532	1.16	1.7226	0.5626
2012Q2	1.4	1.6958	0.2958	1.3287	1.7231	0.3944	1.395	1.805	0.41	1.3964	1.7456	0.3491	1.492	1.8296	0.3377
2012Q3	0.9719	1.3064	0.3345	1	1.4011	0.4011	1	1.4634	0.4634	1.0679	1.6569	0.589	1.1726	1.7547	0.5821
2012Q4	1.0786	1.5474	0.4688	0.9931	1.5	0.5069	1.0389	1.4975	0.4587	1.3	1.6013	0.3013	1.2666	1.7836	0.517
2013Q1	1.1719	1.6312	0.4593	1.2808	1.5647	0.2838	1.4074	1.7	0.2926	1.332	1.75	0.418	1.4237	1.7731	0.3494
2013Q2	1.3	1.7014	0.4014	1.1973	1.6284	0.4311	1.3	1.773	0.473	1.5	1.8	0.3	1.4577	1.839	0.3813
2013Q3	1.4	1.6193	0.2193	1.3358	1.7109	0.3751	1.3936	1.7654	0.3718	1.4953	1.7595	0.2642	1.4511	1.8481	0.397
2013Q4	1.5	1.7207	0.2207	1.4552	1.7224	0.2672	1.388	1.8547	0.4667	1.302	1.8828	0.5809	1.302	1.9094	0.6075
2014Q1	1.3509	1.6586	0.3077	1.5713	1.8457	0.2743	1.4582	1.8779	0.4196	1.3989	1.9248	0.5258	1.5085	1.9255	0.4171
2014Q2	1.8858	2.1015	0.2157	1.5135	1.9175	0.4039	1.4898	1.9048	0.415	1.5266	1.9716	0.445	1.5927	2.0283	0.4356
2014Q3	1.8101	2.1	0.2899	1.6224	2.0554	0.433	1.5531	2.0302	0.4771	1.6	2.02	0.42	1.5474	2.0151	0.4676
2014Q4	1.7643	2.0049	0.2406	1.5541	2	0.4459	1.5141	2	0.4859	1.3967	2.0905	0.6938	1.3012	2.0381	0.7369
2015Q1	2.0606	2.4235	0.3629	1.7757	2.2182	0.4425	1.5893	2.1121	0.5228	1.5838	2.1204	0.5367	1.4025	2.015	0.6126
2015Q2	1.5951	1.848	0.2528	1.6699	2	0.3301	1.4927	2.0151	0.5224	1.3409	2.0151	0.6741	1.3748	2.0119	0.6371
2015Q3	1.7609	1.9547	0.1938	1.6256	1.9136	0.288	1.477	1.8739	0.3969	1.4554	1.8298	0.3744	1.3472	1.8131	0.4658
2015Q4	1.6096	1.7636	0.154	1.4657	1.7155	0.2498	1.4778	1.6835	0.2057	1.3401	1.6782	0.3381	1.3472	1.6701	0.3229
2016Q1	1.4412	1.75	0.3088	1.423	1.6845	0.2615	1.2862	1.6	0.3138	1.2086	1.543	0.3344	1.1446	1.5	0.3554
2016Q2	1.4495	1.7165	0.267	1.3772	1.6753	0.298	1.2544	1.6375	0.3831	1.0065	1.6096	0.6031	1.0926	1.6314	0.5388
2016Q3	1.2476	1.7702	0.5226	1.2	1.6	0.4	1.1224	1.4964	0.3741	1.0349	1.4909	0.456	1	1.4027	0.4027
2016Q4	1.3646	1.5667	0.2021	1.297	1.524	0.2269	1.2811	1.5733	0.2922	1.2337	1.4508	0.2171	1.0901	1.4508	0.3607
2017Q1	1.3713	1.5938	0.2225	1.3235	1.5331	0.2096	1.2364	1.5121	0.2757	1.2324	1.5064	0.274	1.1609	1.517	0.3561
2017Q2	1.3907	1.6572	0.2665	1.3969	1.5566	0.1597	1.2918	1.5	0.2082	1.2256	1.5	0.2744	1.184	1.5	0.316
2017Q3	1.375	1.6193	0.2443	1.2239	1.4747	0.2508	1.1762	1.4396	0.2634	1.1565	1.4284	0.2719	1.0851	1.4233	0.3382
2017Q4	1.3017	1.7337	0.432	1.2449	1.5005	0.2556	1.2004	1.4303	0.2298	1.1125	1.3374	0.225	1.1	1.2998	0.1998
2018Q1	1.3519	1.5527	0.2008	1.3031	1.5446	0.2415	1.2769	1.438	0.1611	1.2298	1.4564	0.2266	1.0731	1.3439	0.2708
2018Q2	1.4072	1.5707	0.1634	1.3306	1.5711	0.2405	1.2287	1.5	0.2713	1.1377	1.4	0.2623	1.058	1.3233	0.2653
2018Q3	1.4863	1.6437	0.1574	1.3118	1.5579	0.2461	1.2073	1.4513	0.244	1.0694	1.4433	0.3739	0.9328	1.3081	0.3753
2018Q4	1.499	1.6855	0.1865	1.2522	1.5415	0.2892	1.1904	1.47	0.2796	1.0489	1.4032	0.3542	0.9739	1.3436	0.3697
2019Q1	1.4782	1.6333	0.1551	1.2043	1.5	0.2957	1.1045	1.4049	0.3004	1.056	1.3	0.244	0.9779	1.244	0.2662
2019Q2	1.3646	1.6108	0.2462	1.1761	1.4074	0.2312	1.0824	1.3642	0.2818	0.9652	1.2645	0.2993	0.8665	1.4249	0.5584
2019Q3	1.1045	1.2819	0.1774	1.0038	1.2054	0.2017	0.9244	1.2544	0.3299	0.8808	1.3	0.4192	0.5252	1.156	0.6308
2019Q4	1.0995	1.3318	0.2323	0.9511	1.2297	0.2785	0.9209	1.3434	0.4225	0.5545	1.1816	0.6271	0.4582	1.1	0.6418
2020Q1	1.3243	1.5	0.1757	1.1123	1.6048	0.4925	0.5176	1.2194	0.7018	0.7476	1.2	0.4524	0.7848	1.2122	0.4274
2020Q2	-51.483	-38.0729	13.4101	1.0627	29.6322	28.5694	2.5558	14.1377	11.5818	1.3851	8.8	7.4149	1.658	7.434	5.776
2020Q3	12.552	22.2583	9.7063	1.5959	8.5503	6.9544	2.0898	6.4684	4.3786	1.5056	4.4211	2.9156	1.612	4.3716	2.7596
2020Q4	4.6569	6.9462	2.2893	2.8716	5.7024	2.8309	2.2408	4.1951	1.9542	1.701	3.7852	2.0842	1.5705	3.1547	1.5842
2021Q1	0.6	1.8892	1.2892	2.3966	4.6605	2.2638	2.032	5.6221	3.5901	2.1101	4.9275	2.8174	1.7699	3.3125	1.5425
2021Q2	3.1221	6.6472	3.5251	3.3679	7.2092	3.8414	2.9523	4.9729	2.0205	2.3278	3.2217	0.8938	1.9836	2.647	0.6634
2021Q3	4.7255	7.2198	2.4943	3.1975	5.4654	2.2679	2.7275	3.933	1.2055	2.0151	3.1	1.0849	1.592	2.543	0.9509
2021Q4	2.938	4.3762	1.4382	2.6357	3.9915	1.3558	2.0151	3.2492	1.2342	1.6053	2.8	1.1947	1.2412	2.3914	1.1502

## Sheet: INDPROD
Measures of Cross-Sectional Dispersion for Quarterly Forecasts for INDUSTRIAL PRODUCTION (INDPROD)
Units: Annualized Percentage Points
Dispersion Measure D2 = 75th Percentile Minus 25th Percentile of the Forecasts for Q/Q Growth
P25 = 25th Percentile of the Forecasts for Q/Q Growth
P75 = 75th Percentile of the Forecasts for Q/Q Growth
At Each Survey Date T, the Quarterly Horizons Are T, T+1, T+2, T+3, and T+4
Survey_Date(T)	INDPROD_P25_D2(T)	INDPROD_P75_D2(T)	INDPROD_D2(T)	INDPROD_P25_D2(T+1)	INDPROD_P75_D2(T+1)	INDPROD_D2(T+1)	INDPROD_P25_D2(T+2)	INDPROD_P75_D2(T+2)	INDPROD_D2(T+2)	INDPROD_P25_D2(T+3)	INDPROD_P75_D2(T+3)	INDPROD_D2(T+3)	INDPROD_P25_D2(T+4)	INDPROD_P75_D2(T+4)	INDPROD_D2(T+4)
1968Q4	0	2.4614	2.4614	0	2.4464	2.4464	0	2.4614	2.4614	2.4614	4.9374	2.4759	2.4464	4.999	2.5527
1969Q1	0	4.8772	4.8772	-2.3459	2.4315	4.7774	0	4.8476	4.8476	2.3738	4.8476	2.4738	#N/A	#N/A	#N/A
1969Q2	2.3738	4.7896	2.4158	0	2.3738	2.3738	-2.3054	2.3598	4.6652	0	4.6235	4.6235	#N/A	#N/A	#N/A
1969Q3	2.3187	4.7051	2.3863	-2.2791	2.3054	4.5845	-2.2791	2.3323	4.6114	0	4.5707	4.5707	#N/A	#N/A	#N/A
1969Q4	-2.2791	-2.2791	0	-4.5577	0	4.5577	-2.3255	2.3323	4.6578	2.3323	4.804	2.4717	2.3738	6.9742	4.6005
1970Q1	-6.7963	-2.3054	4.4909	-2.3459	2.3598	4.7057	2.3054	6.9945	4.6891	2.388	7.1189	4.731	#N/A	#N/A	#N/A
1970Q2	-2.3323	2.3738	4.706	0	4.7896	4.7896	2.3598	4.7896	2.4298	2.3459	4.7611	2.4151	2.3187	4.7611	2.4423
1970Q3	-2.3459	2.388	4.7339	2.3738	4.8184	2.4446	2.3951	5.9563	3.5612	2.3459	4.7896	2.4436	2.3187	4.747	2.4283
1970Q4	-11.3838	-4.6775	6.7062	7.3367	18.3165	10.9797	4.8184	9.8089	4.9905	2.3054	4.719	2.4136	2.388	7.0355	4.6475
1971Q1	10.1832	18.3165	8.1333	4.999	12.3699	7.3709	0	4.8184	4.8184	4.6776	7.2479	2.5703	4.6235	9.034	4.4105
1971Q2	7.4735	15.3583	7.8848	0	7.2479	7.2479	4.7896	9.6902	4.9006	4.7329	9.4611	4.7282	4.6504	9.0853	4.4349
1971Q3	4.8476	9.8694	5.0218	4.7611	9.6902	4.9291	5.1602	9.4611	4.3009	4.6504	9.3506	4.7002	4.5447	6.9139	2.3692
1971Q4	3.8273	7.7635	3.9361	3.8273	11.6955	7.8682	7.4043	11.257	3.8527	5.4162	11.1012	5.685	6.954	7.3704	0.4164
1972Q1	3.7911	11.6955	7.9044	7.5439	11.4721	3.9281	7.2044	7.4735	0.2691	7.2044	10.8502	3.6459	3.5239	7.2044	3.6805
1972Q2	7.5439	11.4721	3.9281	7.3365	11.1525	3.816	7.077	10.8502	3.7733	3.5239	7.077	3.5531	3.4629	7.077	3.6141
1972Q3	7.3365	11.1525	3.816	7.1401	10.8502	3.7101	3.5239	7.077	3.5531	3.4629	6.954	3.4911	3.3752	6.8352	3.46
1972Q4	7.1401	10.8502	3.7101	6.8941	7.077	0.1829	6.7773	6.8941	0.1168	3.347	6.7773	3.4303	3.2919	6.6094	3.3175
1973Q1	6.954	10.5639	3.6099	6.7773	10.2923	3.515	3.3192	6.7204	3.4012	3.265	6.5552	3.2902	3.1126	6.3473	3.2347
1973Q2	6.7773	10.2923	3.515	6.6094	9.9512	3.3418	3.2386	6.502	3.2634	0	6.3473	6.3473	0	3.2126	3.2126
1973Q3	3.2386	6.5552	3.3166	0	3.2386	3.2386	0	3.187	3.187	0	3.2126	3.2126	1.498	6.2973	4.7993
1973Q4	0	3.187	3.187	-6.152	0	6.152	-6.105	0	6.105	0	3.2919	3.2919	3.1126	6.502	3.3894
1974Q1	-9.1193	-6.152	2.9673	-3.187	0	3.187	3.187	3.2919	0.1049	3.2126	6.6094	3.3968	3.187	6.5552	3.3682
1974Q2	-6.248	0	6.248	0	3.2919	3.2919	3.187	6.5552	3.3682	3.187	6.502	3.315	3.2126	6.5552	3.3426
1974Q3	0	3.2386	3.2386	0	3.2386	3.2386	0	3.2386	3.2386	3.1618	6.398	3.2362	#N/A	#N/A	#N/A
1974Q4	-9.2599	-3.1618	6.0981	-9.3319	0	9.3319	-3.265	3.3192	6.5843	3.2386	6.7204	3.4818	3.404	9.9512	6.5472
1975Q1	-18.2679	-9.4792	8.7887	-6.6092	3.4332	10.0424	0	10.5639	10.5639	3.5239	10.5639	7.04	6.6094	10.3813	3.7719
1975Q2	-7.0147	0	7.0147	3.6863	11.1525	7.4663	7.4043	12.0474	4.643	7.2698	14.6559	7.3861	6.954	14.0149	7.061
1975Q3	3.6863	7.4735	3.7872	7.3365	11.257	3.9206	7.2044	14.6559	7.4515	7.0149	10.8502	3.8353	6.954	10.4718	3.5178
1975Q4	7.2044	14.7912	7.5868	7.0149	10.6577	3.6427	6.8941	10.4718	3.5777	6.6094	10.2049	3.5955	6.4496	9.9512	3.5016
1976Q1	6.954	10.5639	3.6099	6.8352	10.3813	3.5461	6.7204	10.1189	3.3985	6.6094	10.0343	3.4249	6.3473	9.5936	3.2463
1976Q2	6.8352	10.3813	3.5461	6.7204	10.2049	3.4845	6.5552	9.8694	3.3141	6.2973	9.6319	3.3346	6.1521	9.4055	3.2535
1976Q3	6.3473	9.6319	3.2846	6.2482	9.4798	3.2317	6.0589	9.1896	3.1307	5.9243	8.9833	3.059	3.0886	6.1521	3.0635
1976Q4	6.2482	9.4798	3.2317	6.1051	9.2965	3.1913	6.0134	9.0854	3.072	5.8379	6.1521	0.3142	2.8673	5.8808	3.0135
1977Q1	0	6.1521	6.1521	9.1198	12.6834	3.5636	5.9243	12.294	6.3696	5.7956	8.9166	3.121	3.0649	8.5363	5.4713
1977Q2	6.1051	12.4857	6.3805	5.9685	9.0511	3.0825	5.8379	8.8509	3.013	4.3121	7.283	2.9709	2.9631	5.7334	2.7703
1977Q3	2.9302	8.9833	6.0531	5.7956	8.7861	2.9905	2.8468	8.4166	5.5698	2.8267	5.7129	2.8862	2.749	5.7539	3.005
1977Q4	2.9089	5.8808	2.9719	5.7129	5.8379	0.125	2.8468	5.7539	2.9072	2.8068	5.6724	2.8655	2.8068	5.6324	2.8256
1978Q1	2.9089	5.8808	2.9719	2.9518	8.7223	5.7705	2.8672	5.7956	2.9284	2.768	5.7129	2.9449	2.7117	5.5931	2.8814
1978Q2	5.8379	11.9278	6.0899	5.5931	5.7539	0.1609	2.8267	5.6724	2.8457	0	2.8068	2.8068	2.6754	5.4782	2.8028
1978Q3	2.8068	5.6724	2.8655	2.768	5.5931	2.8251	0	5.5543	5.5543	0	5.3322	5.3322	0	5.3322	5.3322
1978Q4	2.749	5.5543	2.8053	0	4.095	4.095	-2.6754	2.7026	5.378	-5.1939	2.7118	7.9057	-3.9178	5.2969	9.2147
1979Q1	2.6935	5.441	2.7475	-2.6228	2.6935	5.3163	-5.262	2.6401	7.9021	-7.8137	2.6577	10.4714	-2.6754	5.2969	7.9723
1979Q2	-1.3114	2.6754	3.9868	-5.1937	0	5.1937	-7.7635	0	7.7635	-5.1437	5.5351	10.6788	0	5.441	5.441
1979Q3	-5.1937	-2.6228	2.5709	-7.9168	-5.2276	2.6891	-5.2968	2.749	8.0458	0	5.5543	5.5543	5.368	8.5363	3.1683
1979Q4	-7.6641	-2.6057	5.0583	-10.3135	-5.1937	5.1198	-7.9693	0	7.9693	0	5.9243	5.9243	5.1937	8.6594	3.4657
1980Q1	-5.1602	0	5.1602	-7.7133	0	7.7133	-7.9168	0	7.9168	0	5.441	5.441	2.6228	6.6783	4.0555
1980Q2	-13.4346	-5.1769	8.2576	-10.6214	-3.9605	6.6609	-5.535	2.7118	8.2469	0	5.734	5.734	2.768	8.5363	5.7683
1980Q3	-17.9565	-13.0959	4.8605	-2.8468	5.8808	8.7276	2.9302	8.9166	5.9864	5.7129	11.9278	6.2149	8.187	12.1081	3.9211
1980Q4	2.8672	11.7527	8.8855	2.749	5.7539	3.005	2.7873	8.5974	5.8101	5.4782	8.4166	2.9384	5.4782	10.8015	5.3233
1981Q1	0	5.516	5.516	0	5.441	5.441	2.7117	8.0229	5.3112	2.6935	8.187	5.4936	5.262	8.1316	2.8695
1981Q2	0	2.6577	2.6577	2.6577	5.4042	2.7465	5.262	8.0768	2.8148	5.1937	7.9696	2.7759	5.0623	7.814	2.7517
1981Q3	0	2.6401	2.6401	0	5.2969	5.2969	2.6228	7.9171	5.2942	5.1602	7.8652	2.7049	5.1937	7.7635	2.5697
1981Q4	-12.445	-7.6155	4.8295	-5.2968	-2.5889	2.708	2.6401	8.2432	5.6031	5.6724	11.101	5.4286	5.2969	10.8015	5.5046
1982Q1	-15.4525	-7.9693	7.4832	2.7873	8.7861	5.9988	8.358	11.4995	3.1416	5.5543	11.101	5.5467	2.6228	8.0768	5.454
1982Q2	-5.5159	0	5.5159	5.7539	8.8509	3.0969	5.6724	11.4176	5.7452	5.441	8.476	3.035	5.3322	8.358	3.0258
1982Q3	-2.8468	2.9089	5.7557	2.9518	8.9166	5.9648	2.9518	8.8509	5.8991	5.5931	8.476	2.8829	5.4782	8.5974	3.1192
1982Q4	-5.6723	0	5.6723	2.9518	8.9838	6.032	2.9518	8.9833	6.0315	5.7539	8.8838	3.1298	5.6724	8.8185	3.1461
1983Q1	6.0589	6.0589	0	5.9685	9.0511	3.0825	5.8808	11.7961	5.9153	5.8594	10.0147	4.1553	2.8468	8.5363	5.6895
1983Q2	5.9243	15.2996	9.3753	5.8379	11.7527	5.9148	5.7539	8.7861	3.0322	5.4782	8.358	2.8798	5.4042	8.2432	2.839
1983Q3	11.5827	17.7376	6.1549	5.4782	11.101	5.6228	5.3322	8.187	2.8548	5.262	8.0768	2.8148	5.2277	8.0229	2.7952
1983Q4	8.1316	13.8215	5.6899	5.2277	7.9171	2.6894	5.0945	5.1937	0.0992	5.0623	7.616	2.5537	2.4921	5.212	2.7199
1984Q1	5.2277	9.2874	4.0597	5.1272	7.7635	2.6363	4.999	5.0945	0.0955	2.4921	5.0305	2.5384	2.4315	4.9374	2.5059
1984Q2	5.0945	10.3813	5.2868	2.4921	7.5677	5.0756	2.4614	4.968	2.5066	2.4168	4.8772	2.4604	2.388	4.8476	2.4597
1984Q3	4.999	10.1832	5.1842	4.8772	7.3816	2.5044	2.4168	4.8772	2.4604	0	4.7611	4.7611	0	4.7051	4.7051
1984Q4	-2.388	2.4315	4.8195	2.4023	4.9071	2.5048	2.388	4.8476	2.4597	2.3459	4.8184	2.4725	2.3187	4.7896	2.4708
1985Q1	4.9374	7.4735	2.5361	2.4168	7.3365	4.9197	2.388	4.8476	2.4597	2.3459	4.7611	2.4151	2.3323	4.664	2.3317
1985Q2	2.4464	4.9374	2.491	3.6545	7.3816	3.7271	2.4023	4.833	2.4307	2.3598	4.7611	2.4013	2.3323	4.6235	2.2913
1985Q3	3.265	3.265	0	3.2126	6.5552	3.3426	3.187	6.1997	3.0127	0	3.187	3.187	0	3.1618	3.1618
1985Q4	0	3.2386	3.2386	0	3.2386	3.2386	3.137	3.2386	0.1016	0	6.398	6.398	3.0886	6.3473	3.2587
1986Q1	3.2386	6.5552	3.3166	3.187	6.4496	3.2626	3.1126	6.398	3.2854	3.0886	6.2973	3.2087	0	3.137	3.137
1986Q2	-3.137	3.2126	6.3496	3.187	6.502	3.315	3.1618	6.4496	3.2878	3.0886	6.1997	3.1112	0	3.1618	3.1618
1986Q3	-3.1618	0	3.1618	3.2126	3.265	0.0524	3.2126	3.2386	0.026	3.187	6.4496	3.2626	3.1618	6.3473	3.1855
1986Q4	0	3.2386	3.2386	0	3.2126	3.2126	3.187	3.265	0.078	3.1618	6.4496	3.2878	3.137	6.3473	3.2103
1987Q1	0	3.2126	3.2126	0	3.2126	3.2126	3.1618	3.2126	0.0508	3.137	6.3473	3.2103	0	4.598	4.598
1987Q2	0	3.187	3.187	3.1618	6.398	3.2362	3.137	6.3473	3.2103	3.0886	3.187	0.0984	0	6.0589	6.0589
1987Q3	1.5685	6.398	4.8295	3.137	6.2973	3.1603	3.0533	6.2239	3.1707	1.5093	3.1126	1.6033	3.0187	3.137	0.1184
1987Q4	3.0886	3.0886	0	0	3.0649	3.0649	0	3.0649	3.0649	0	3.0416	3.0416	0	3.0649	3.0649
1988Q1	0	3.0416	3.0416	0	3.0187	3.0187	0	3.0416	3.0416	2.996	5.9243	2.9283	2.9302	6.0134	3.0832
1988Q2	0	6.0589	6.0589	2.9518	5.9243	2.9725	2.9518	5.9243	2.9725	0	2.9518	2.9518	0	2.9518	2.9518
1988Q3	2.9738	6.0134	3.0396	2.9302	5.9685	3.0383	2.8881	2.9302	0.0422	2.8268	2.9304	0.1035	0	2.857	2.857
1988Q4	5.7129	5.9243	0.2115	2.8879	2.9089	0.021	2.8672	2.8879	0.0207	0	2.8468	2.8468	-2.7117	2.8267	5.5384
1989Q1	2.8879	2.8879	0	2.857	4.3418	1.4848	0	4.3004	4.3004	-1.3745	2.8672	4.2417	-2.7399	2.7873	5.5271
1989Q2	0	2.8672	2.8672	0	2.8468	2.8468	0	2.8267	2.8267	-2.6754	2.8068	5.4823	-1.384	2.8168	4.2008
1989Q3	1.4219	2.8672	1.4453	0	2.8468	2.8468	-2.768	2.8267	5.5947	0.5598	2.8468	2.287	0	5.6724	5.6724
1989Q4	-2.7873	2.8468	5.6341	0	2.8672	2.8672	0	2.8468	2.8468	0	2.8468	2.8468	2.7873	2.8267	0.0394
1990Q1	0	2.8468	2.8468	0	2.8468	2.8468	0	2.8267	2.8267	2.7873	2.8672	0.0799	0	2.8068	2.8068
1990Q2	3.7555	4.5169	0.7615	3.3368	5.0481	1.7113	-3.4769	3.6778	7.1547	1.9898	3.6694	1.6796	2.3428	3.6526	1.3098
1990Q3	1.8424	3.7205	1.8781	-1.8042	0.7306	2.5348	-1.8124	3.6863	5.4986	0	2.2078	2.2078	1.6773	3.6361	1.9588
1990Q4	-4.2736	-2.51	1.7637	-4.3276	-1.4532	2.8744	-2.2038	0.3678	2.5716	1.1085	3.6526	2.5441	2.2078	4.8207	2.6128
1991Q1	-7.5403	-4.0049	3.5353	-2.9765	0	2.9765	1.508	4.1959	2.6879	2.5913	5.7984	3.2072	2.6476	5.9685	3.3209
1991Q2	-3.7205	0	3.7205	1.9074	4.265	2.3576	3.0532	5.6457	2.5925	3.6863	5.7265	2.0402	3.7205	5.9464	2.2258
1991Q3	3.4332	7.7635	4.3303	3.2278	6.858	3.6302	3.5419	5.2083	1.6664	3.0005	5.6906	2.6902	3.2799	5.1038	1.8239
1991Q4	1.1147	2.6179	1.5032	1.8717	4.1174	2.2457	2.6033	4.8028	2.1995	3.3439	5.5671	2.2232	2.9089	5.0899	2.181
1992Q1	-2.2001	1.4897	3.6899	1.9988	3.7661	1.7673	3.3848	5.8031	2.4184	3.7555	5.8971	2.1416	3.4987	5.8273	2.3286
1992Q2	3.7983	5.7374	1.9392	4.2015	6.0589	1.8574	4.083	6.7393	2.6563	3.6693	6.2623	2.5929	3.268	5.1472	1.8792
1992Q3	1.9007	3.7449	1.8442	2.971	4.8749	1.9039	2.9464	5.1994	2.253	3.6426	5.4558	1.8132	3.5935	5.441	1.8474
1992Q4	0.3678	2.5961	2.2282	2.9518	4.1012	1.1493	2.9302	4.794	1.8638	3.6195	4.9998	1.3802	3.2591	5.1206	1.8615
1993Q1	3.3101	4.8073	1.4972	3.2026	4.403	1.2004	3.1028	4.7243	1.6215	3.3009	4.9018	1.6009	3.0138	4.2718	1.258
1993Q2	2.164	3.6261	1.4621	3.0982	4.703	1.6048	3.1985	5.2031	2.0046	3.4003	4.9374	1.5371	2.8468	4.4001	1.5534
1993Q3	1.8128	3.304	1.4912	2.8779	4.2535	1.3756	2.8801	4.4	1.5199	2.8	3.9546	1.1546	2.5145	3.9089	1.3944
1993Q4	3.6004	6.1986	2.5982	2.5122	4.7329	2.2207	2.5982	4.1991	1.6008	2.4988	4.2699	1.7711	3.1674	3.9011	0.7337
1994Q1	3.5839	6.1493	2.5654	2.8167	4.6194	1.8027	2.8192	4.2248	1.4056	2.7656	3.8273	1.0617	2.3941	3.4659	1.0718
1994Q2	3.3456	5.1488	1.8031	3.0114	4.3764	1.365	2.7948	4.019	1.2242	2.39	3.4214	1.0314	2.421	3.3953	0.9743
1994Q3	2.0815	4.5428	2.4613	2.4126	4.5008	2.0882	2.0408	4.0005	1.9597	2.3698	4.002	1.6322	2.0998	3.599	1.4992
1994Q4	3.0754	4.9895	1.9141	2.4489	4.076	1.6271	2.3381	3.7591	1.421	2.4092	3.4473	1.0381	2.5136	3.4323	0.9187
1995Q1	3.8005	5.4225	1.622	3.2999	4.498	1.1982	2.0997	3.9993	1.8996	1.9512	3.3012	1.3501	1.9736	2.935	0.9614
1995Q2	-0.9987	2.6467	3.6454	1.3147	3.311	1.9963	2.5008	4.0024	1.5016	2.2847	3.6496	1.3649	2.2408	3.5667	1.3259
1995Q3	0.6628	2.6732	2.0104	2.5996	4.0196	1.42	2.355	3.9665	1.6115	2.6207	3.6971	1.0764	2.281	3.5697	1.2887
1995Q4	1.6427	3.4988	1.8561	1.9992	3.6136	1.6144	2.2773	3.8008	1.5235	2.5847	3.5581	0.9734	1.7012	3.265	1.5638
1996Q1	-0.3259	1.4771	1.8029	1.3109	3.9616	2.6507	2.3012	3.7995	1.4983	2.1004	3.8574	1.7569	1.3999	3.9017	2.5018
1996Q2	2.6185	5.2881	2.6696	2.0018	3.9052	1.9034	1.9308	3.4008	1.47	1.9261	3.187	1.2609	1.9199	3.1946	1.2747
1996Q3	2.2571	4.2219	1.9649	1.9215	4.1745	2.253	2.2283	3.1618	0.9335	1.5816	3.1248	1.5431	1.5742	2.8224	1.2483
1996Q4	1.2678	2.7986	1.5308	1.7	3.1744	1.4743	1.8009	2.8289	1.028	1.8823	3.1126	1.2303	1.8691	3.0886	1.2195
1997Q1	2.1994	4.5269	2.3275	2.0636	3.7716	1.708	2.0006	3.404	1.4034	1.7998	4.0399	2.2401	1.6842	3.001	1.3169
1997Q2	2.3798	4.7513	2.3715	2.3708	3.8063	1.4356	2.005	3.8553	1.8503	1.6723	3.3472	1.6749	1.4999	3.2919	1.792
1997Q3	2.3618	3.4989	1.1372	2.3499	3.3611	1.0112	1.995	3.3192	1.3243	1.8994	3.3247	1.4254	1.9736	3.4016	1.4279
1997Q4	2.9936	5.0263	2.0327	2.2981	3.5027	1.2046	1.9704	3.7999	1.8295	1.9464	3.3192	1.3728	1.6029	3.4001	1.7972
1998Q1	2.5355	4.501	1.9655	1.8882	3.137	1.2488	1.248	2.8998	1.6518	1.557	3.3394	1.7824	1.5983	3.6693	2.071
1998Q2	1.8942	3.1718	1.2777	1.7996	3.5865	1.7869	1.4001	3.4373	2.0372	1.6011	3.3935	1.7923	1.8981	3.0416	1.1435
1998Q3	-0.6211	2.7993	3.4205	1.8764	4.8008	2.9243	1.5007	3.4602	1.9594	1.859	3.103	1.244	1.8334	3.0996	1.2662
1998Q4	1.8853	3.794	1.9088	0.8023	3.137	2.3347	0.9299	2.8025	1.8726	1.2422	3.1126	1.8704	1.5426	3.1175	1.5749
1999Q1	1.5168	3.2053	1.6885	1.5059	3.3368	1.831	1.7486	3.0301	1.2815	1.7937	3.2883	1.4946	0.8945	2.6305	1.736
1999Q2	2.2006	3.9827	1.7821	1.8113	3.3394	1.5281	2.0934	3.8874	1.794	0.298	2.9345	2.6366	0.8932	2.9584	2.0652
1999Q3	2.4095	4.8627	2.4532	2.6915	4.1958	1.5043	0.5893	2.6616	2.0723	1.6189	2.9334	1.3146	2.0786	3.5059	1.4273
1999Q4	2.388	3.902	1.514	1.7582	2.9738	1.2156	1.8014	3.5447	1.7434	2.0475	3.8105	1.763	1.7556	3.4805	1.7248
2000Q1	2.5982	4.6538	2.0556	2.4987	3.7259	1.2272	2.2971	3.9853	1.6882	2.2001	3.946	1.7459	2.5289	3.9102	1.3813
2000Q2	3.5002	5.1788	1.6786	2.9999	4.4996	1.4996	3.0606	4.7461	1.6855	2.7585	4.1161	1.3576	2.7738	4.1133	1.3395
2000Q3	3.3705	4.7997	1.4292	2.7873	4.7132	1.9259	2.4767	3.6996	1.2229	2.4999	3.5576	1.0578	2.6989	3.798	1.0991
2000Q4	2.7776	4.1879	1.4103	2.7604	3.6981	0.9377	2.4986	4.0016	1.503	2.7001	3.7993	1.0992	2.9618	4.0825	1.1207
2001Q1	-3.9928	0.2002	4.193	-0.8194	2.4648	3.2842	1.5004	4.1004	2.6001	2.7007	4.8937	2.193	2.9558	4.8346	1.8788
2001Q2	-1.6304	1.3741	3.0045	0	3.3146	3.3146	1.2983	4.1218	2.8235	2.4904	4.1879	1.6976	3.2364	4.3769	1.1405
2001Q3	-4.6583	-1.0004	3.6579	-1.399	3.1281	4.5271	1.7155	4.5544	2.839	2.7002	4.8031	2.1029	2.4869	4.4994	2.0125
2001Q4	-7.9438	-4.1704	3.7734	-2.8387	1.7241	4.5628	0.5986	4.3805	3.7819	2.8672	5.8808	3.0136	3.3587	6.0263	2.6676
2002Q1	-2.0282	1.173	3.2012	1.9014	4.8004	2.899	2.9324	5.9995	3.0671	3.5369	6.7057	3.1688	3.9824	6.1185	2.136
2002Q2	3.2267	5.9243	2.6976	3.7691	5.8379	2.0688	3.1993	5.8379	2.6386	3.9768	6.306	2.3292	3.8857	6.3626	2.4769
2002Q3	2.4007	4.9571	2.5564	2.8673	4.9713	2.104	3.5588	5.2854	1.7265	3.902	5.9285	2.0265	3.6071	5.5717	1.9646
2002Q4	-0.4994	1.7167	2.2161	2.2856	4.0254	1.7398	2.8468	4.574	1.7272	3.6001	5.9411	2.341	3.6424	5.6752	2.0328
2003Q1	1.1449	2.9111	1.7662	2.1838	4.3769	2.1932	2.8892	5.0906	2.2014	3.0628	5.585	2.5222	3.584	5.6399	2.0559
2003Q2	-1.6493	1.8198	3.4691	1.9172	4.0473	2.1302	2.9169	4.689	1.7721	3.5952	5.4686	1.8734	3.5954	5.6135	2.0182
2003Q3	1.8373	4.3992	2.5619	2.5145	4.7022	2.1878	3.271	5.4993	2.2283	3.4979	5.3824	1.8845	3.5552	5.5931	2.0379
2003Q4	3.6649	5.1858	1.5209	3.5054	5.8507	2.3453	3.0723	5.8694	2.7971	3.1509	5.4758	2.3249	3.455	5.5705	2.1155
2004Q1	4.1079	6.5433	2.4354	3.9688	6.8046	2.8358	4.2137	6.3194	2.1058	3.8	5.9295	2.1296	3.2617	5.7962	2.5346
2004Q2	4.1256	5.5999	1.4744	4.4347	6.3867	1.952	3.5037	6.0005	2.4968	3.4332	6.1785	2.7453	3.7049	5.4009	1.696
2004Q3	2.9432	4.5761	1.6328	3.4629	6.4889	3.026	3.3195	5.7011	2.3816	3.5006	5.002	1.5014	3.039	5.2987	2.2597
2004Q4	3.0006	4.4994	1.4988	2.9004	5.3995	2.4992	2.7443	4.7992	2.0549	2.4973	5.0559	2.5586	2.9936	5.0989	2.1053
2005Q1	3.8107	5.3403	1.5295	3.0979	4.4724	1.3745	3.2054	4.9982	1.7928	3.2001	5.0332	1.8331	2.6867	4.0855	1.3988
2005Q2	2.7349	4.0656	1.3308	2.9962	4.4448	1.4487	3.2389	4.3765	1.1376	3.1046	4.1031	0.9985	2.9304	4.501	1.5706
2005Q3	3.4098	5.6934	2.2837	3.1397	4.0501	0.9104	2.8894	3.9995	1.1101	2.4043	3.9796	1.5754	2.552	3.8005	1.2485
2005Q4	0.7179	3.6006	2.8827	2.7117	4.7968	2.0851	2.6957	4.0365	1.3408	3.0919	4.3165	1.2246	2.4074	3.773	1.3655
2006Q1	3.7205	5.6193	1.8987	2.6	4.5017	1.9016	2.8862	4.3749	1.4887	2.7668	4.5476	1.7808	2.51	3.9977	1.4877
2006Q2	3.3982	4.996	1.5978	3.0396	4	0.9604	2.6995	4.0819	1.3824	2.4833	3.8113	1.3281	2.1716	3.8643	1.6927
2006Q3	2.9717	4.8591	1.8874	2.4932	3.8655	1.3723	2.2089	3.6791	1.4701	2.3257	3.4966	1.1709	2.47	3.5157	1.0457
2006Q4	0.9972	2.7	1.7028	2.1676	3.2	1.0324	2.2975	3.5208	1.2233	2.797	3.7	0.903	2.4045	3.4569	1.0524
2007Q1	1.8306	2.9	1.0694	2.1516	3.3937	1.2422	2.3128	3.6702	1.3574	2.4	3.7997	1.3997	2.4855	3.4932	1.0078
2007Q2	1.7929	2.7537	0.9608	1.7106	2.9082	1.1976	2.138	3.1377	0.9997	2.4	3.187	0.787	2.5	3.1646	0.6646
2007Q3	1.92	3.5871	1.6671	2	3.2012	1.2012	2.1163	3.3637	1.2474	2.4	3.1618	0.7618	2.1963	3.3	1.1037
2007Q4	1.4072	2.8292	1.422	1.3662	2.7791	1.4129	2.0887	3.0916	1.0029	2.0118	3.1248	1.113	2.4312	3.2153	0.7842
2008Q1	-0.4482	1.7223	2.1706	-0.6	2.1219	2.7219	0.6598	2.5	1.8402	1.3948	3.1758	1.781	1.7562	3.5164	1.7601
2008Q2	-1.593	0.6559	2.2488	-0.0276	2.5077	2.5353	0.8069	2.982	2.1751	1.0825	3.2241	2.1416	2.0151	3.3846	1.3696
2008Q3	-1.4285	1.8988	3.3274	-1	1.444	2.444	-0.1088	2.6	2.7088	1.2325	3.1983	1.9658	1.5	3.2076	1.7076
2008Q4	-6.6319	-3.3	3.3319	-5.0864	-1.1024	3.9839	-2.6057	0.7626	3.3684	-0.3779	2.4	2.7779	1.3985	3.1362	1.7377
2009Q1	-12.4863	-6.5	5.9863	-4.8485	-1.8	3.0485	-2.3903	1.1863	3.5767	0.6233	3	2.3767	1.626	3.5936	1.9676
2009Q2	-10.8632	-4.6534	6.2098	-5.7895	1.2201	7.0097	0.0018	3.5936	3.5918	1.6949	4.3453	2.6504	2.2	4.6572	2.4572
2009Q3	-1.8	6.184	7.984	1.2008	4.6138	3.413	2	5	3	2.4999	5.4	2.9001	2.9518	5.744	2.7921
2009Q4	3.877	7.1823	3.3053	3.0002	6.0658	3.0656	2.7959	5.3	2.5041	3.0377	5.1	2.0623	3.3377	5.7662	2.4284
2010Q1	4.5	6.9481	2.4481	3.7468	6.4822	2.7354	3.7	6.1081	2.4081	3.4	5.1045	1.7045	3.4102	5.0402	1.6301
2010Q2	4.2	6.8767	2.6767	3.9878	6.5502	2.5625	3.8303	6	2.1697	3.4332	5.376	1.9429	3.319	5.5	2.181
2010Q3	4.0492	5.7	1.6508	3.2	5.5	2.3	3	5.1769	2.1769	3.3411	5.2838	1.9427	3.0187	5.2838	2.2651
2010Q4	1.9199	4.5	2.5801	2.2	4.7534	2.5534	2.6791	4.4	1.7209	3.0905	5	1.9095	3.3261	5.0147	1.6886
2011Q1	3.0025	5.8502	2.8477	3.5	4.738	1.238	3.5	5	1.5	3.3575	5.0043	1.6467	2.8882	4.9	2.0118
2011Q2	3.5	5.295	1.795	3.8726	5.0092	1.1366	3.6	5.4528	1.8528	3.3004	5	1.6996	3.0416	4.8212	1.7796
2011Q3	1.85	3.9275	2.0775	2.3446	4	1.6554	2.3247	4.2752	1.9506	2.3546	4.2345	1.8799	2.7122	4.5569	1.8447
2011Q4	1.3855	3.4443	2.0588	1.6561	3.95	2.2939	1.791	4.2233	2.4323	2.1898	4.3065	2.1167	2.0552	4.2134	2.1582
2012Q1	2.5238	4.3865	1.8626	2.9675	4.1	1.1325	2.8577	3.95	1.0923	2.8734	4.1728	1.2993	2.7275	4.4777	1.7502
2012Q2	2.3563	3.7791	1.4228	2.8295	4.0414	1.2119	2.6095	3.9306	1.3211	2.8295	4.0645	1.235	2.6233	4.0728	1.4495
2012Q3	2.0735	3.6	1.5265	2.2391	3.549	1.3099	2.0356	3.6818	1.6463	2.0533	3.6452	1.5919	2.7	3.9083	1.2083
2012Q4	1.2403	3.4	2.1597	1.6	3.7	2.1	2.2118	3.7133	1.5016	2.8555	4.1	1.2445	2.4266	4.044	1.6174
2013Q1	2.4818	3.8	1.3182	2.464	3.7129	1.2489	2.7	4.102	1.402	2.5901	4.0389	1.4488	2.5657	3.9995	1.4338
2013Q2	1.6246	3.6925	2.0679	2	4	2	2.4266	4.0318	1.6052	2.6184	4.2495	1.631	2.7276	4	1.2724
2013Q3	1.6096	3.553	1.9433	1.826	3.7133	1.8874	2.3832	4	1.6168	2.1303	3.9796	1.8493	1.9811	3.7	1.7189
2013Q4	2.434	4.1043	1.6703	2.4068	3.7755	1.3687	2.7012	3.6758	0.9746	2.6745	3.6271	0.9526	2.7842	3.9342	1.15
2014Q1	2.5755	4.4839	1.9084	2.64	3.9599	1.3199	2.7488	3.7133	0.9646	2.9099	3.8946	0.9847	2.9207	3.9358	1.0151
2014Q2	3.4347	5.5986	2.1639	2.7409	3.8982	1.1573	2.7196	4	1.2804	2.9	4.1999	1.2999	2.6026	4.1	1.4974
2014Q3	2.6183	4.348	1.7297	2.8206	4.2595	1.4388	3.1349	4.1538	1.0189	2.7377	4.2466	1.5089	2.7708	4.4792	1.7084
2014Q4	3.2699	4.5	1.2301	2.7	4.1459	1.4459	2.8	3.8545	1.0545	2.651	3.8	1.149	2.6	4.0755	1.4755
2015Q1	3.4364	4.212	0.7755	2.8	3.6	0.8	2.9932	3.5	0.5068	2.7656	3.5219	0.7562	2.4345	3.8185	1.3841
2015Q2	0.8107	2.5631	1.7524	2.2878	3.7	1.4122	2.6526	3.8433	1.1907	2.2702	3.6638	1.3936	2.2119	3.8179	1.606
2015Q3	1.3559	3.0244	1.6685	2.2524	3.1663	0.914	2.1936	3.5744	1.3808	2.5063	3.6034	1.0971	2.204	3.6901	1.4861
2015Q4	0.7066	2.3723	1.6657	1.8	3.0037	1.2036	1.9705	3.017	1.0465	2.1989	3.4071	1.2082	2.2111	3.3377	1.1266
2016Q1	-0.7786	1.9953	2.7738	1.518	2.5364	1.0184	1.4963	2.6577	1.1614	2	2.9642	0.9642	1.8	2.8393	1.0393
2016Q2	-0.767	1.4688	2.2358	1.3	2.779	1.479	1.5474	2.8121	1.2647	1.6416	3.062	1.4204	1.6064	2.9599	1.3535
2016Q3	0.5	2.7013	2.2013	0.8	2.312	1.512	1.284	2.5749	1.2909	1.5	2.5928	1.0928	1.5194	2.9317	1.4122
2016Q4	0.3777	1.9826	1.6049	1.1186	2.3076	1.189	1.7109	2.6808	0.9699	1.8	2.6627	0.8627	1.9	2.7914	0.8914
2017Q1	1.1566	2.2	1.0434	1.7109	2.9074	1.1965	1.7357	3	1.2643	1.7549	3.0301	1.2752	1.8	2.5957	0.7957
2017Q2	2	4.05	2.05	1.962	3.1383	1.1764	1.7734	2.9658	1.1924	1.7	2.8	1.1	1.7365	2.6577	0.9212
2017Q3	1.991	3.3	1.309	1.9038	2.798	0.8942	1.5579	2.5	0.9421	1.7685	2.6426	0.8741	1.7589	2.6501	0.8912
2017Q4	1.8702	4.1807	2.3105	1.8796	3.3	1.4204	1.902	2.7359	0.8339	1.8894	2.4	0.5106	1.6874	2.3199	0.6325
2018Q1	2.2182	4.5664	2.3481	2.3199	3.5462	1.2263	2.2182	2.9849	0.7667	2.1	3.0339	0.9339	2.015	2.7559	0.7409
2018Q2	3.0387	4.4572	1.4185	2.5227	3.5772	1.0545	2.2556	3.5377	1.2822	2.2182	3.6539	1.4357	2.0151	3.097	1.082
2018Q3	2.2344	3.3495	1.115	2.2366	3.2996	1.0629	2.0873	2.9137	0.8264	1.9	2.5865	0.6865	1.7637	2.6	0.8363
2018Q4	2.043	3.3689	1.3259	2.1175	2.7251	0.6077	1.7728	2.8117	1.0389	1.7109	2.5675	0.8566	1.6	2.5572	0.9572
2019Q1	-0.4319	1.6995	2.1314	1.7406	2.7603	1.0196	1.7411	2.6	0.8589	1.5652	2.5134	0.9482	1.2509	2.5407	1.2899
2019Q2	0.7273	2.4797	1.7524	1.5	2.5558	1.0558	1.2423	2.4	1.1577	1.0628	2.464	1.4012	0.9433	2.4056	1.4623
2019Q3	0.0867	2.3	2.2133	0.4281	1.9421	1.514	1.0192	2.1897	1.1705	0.903	2	1.097	0.3599	2.2	1.8401
2019Q4	0.1	1.5085	1.4085	0.0201	1.9975	1.9774	0.3661	1.8467	1.4805	0.8	2.1738	1.3738	0.6	2.1877	1.5877
2020Q1	-1.2663	1.3	2.5663	0.6301	2.1937	1.5636	0.8	2.4	1.6	0.8	2.2691	1.4691	1.0818	2.5672	1.4854
2020Q2	-50.8029	-25.7424	25.0605	-3.6095	20.5017	24.1111	2.3178	10	7.6822	2.5235	12.2555	9.732	2.3199	7.6987	5.3788
2020Q3	8.8	33.4011	24.6011	4.8525	12.7616	7.9091	3.1775	8	4.8225	2.2142	5.5	3.2857	2.2	5.6601	3.4601
2020Q4	3.0998	9.4661	6.3662	2.5984	6.2937	3.6953	2.4286	5.4531	3.0245	1.9907	4.9	2.9093	2.5627	4.9986	2.4359
2021Q1	3.3323	8.2111	4.8787	3.4326	6.7605	3.3278	3	5.7066	2.7066	2.5	5.4057	2.9057	2.1785	4.9471	2.7686
2021Q2	4.6689	8.4212	3.7523	4.4731	7.5353	3.0621	3.7186	6.3	2.5814	2.6106	4.3256	1.715	2.5592	3.7412	1.182
2021Q3	4.6549	7.7412	3.0862	3.5131	6.0598	2.5467	2.9658	4.5579	1.592	2.6118	3.7874	1.1756	2.2945	3.2776	0.9831
2021Q4	2.2712	4.8433	2.5722	3.0339	5.2299	2.196	2.7249	4.1163	1.3915	2.3255	3.7412	1.4157	2.312	3.2	0.888

## Sheet: HOUSING
Measures of Cross-Sectional Dispersion for Quarterly Forecasts for NEW PRIVATE HOUSING STARTS (HOUSING)
Units: Annualized Percentage Points
Dispersion Measure D2 = 75th Percentile Minus 25th Percentile of the Forecasts for Q/Q Growth
P25 = 25th Percentile of the Forecasts for Q/Q Growth
P75 = 75th Percentile of the Forecasts for Q/Q Growth
At Each Survey Date T, the Quarterly Horizons Are T, T+1, T+2, T+3, and T+4
Survey_Date(T)	HOUSING_P25_D2(T)	HOUSING_P75_D2(T)	HOUSING_D2(T)	HOUSING_P25_D2(T+1)	HOUSING_P75_D2(T+1)	HOUSING_D2(T+1)	HOUSING_P25_D2(T+2)	HOUSING_P75_D2(T+2)	HOUSING_D2(T+2)	HOUSING_P25_D2(T+3)	HOUSING_P75_D2(T+3)	HOUSING_D2(T+3)	HOUSING_P25_D2(T+4)	HOUSING_P75_D2(T+4)	HOUSING_D2(T+4)
1968Q4	-5.1602	8.1316	13.2917	0	13.5411	13.5411	2.5396	18.9344	16.3948	5.0945	27.4429	22.3484	0	25.6881	25.6881
1969Q1	-14.5196	5.1602	19.6798	0	13.0982	13.0982	2.5235	25.6881	23.1646	0	13.8215	13.8215	#N/A	#N/A	#N/A
1969Q2	-25.7903	-15.7414	10.0488	-13.9307	5.1602	19.091	-9.8082	14.0149	23.8231	2.3323	25.6881	23.3559	#N/A	#N/A	#N/A
1969Q3	-32.6108	-10.3135	22.2973	-25.6534	0	25.6534	0	34.5051	34.5051	14.5231	62.4895	47.9665	#N/A	#N/A	#N/A
1969Q4	-36.2316	-15.9653	20.2663	-26.9473	0	26.9473	12.7679	38.6622	25.8944	23.8471	67.7877	43.9406	19.737	43.9054	24.1685
1970Q1	-27.3975	-14.5196	12.8779	0	37.7363	37.7363	16.9859	57.3519	40.3661	17.0164	49.2523	32.2359	#N/A	#N/A	#N/A
1970Q2	0	36.7055	36.7055	16.2952	37.7363	21.4411	6.4496	34.5051	28.0555	13.0982	29.4538	16.3556	6.1521	29.4538	23.3017
1970Q3	9.7889	47.6717	37.8828	9.5552	34.5051	24.9499	5.9715	28.9334	22.9619	14.5231	29.4538	14.9307	9.1896	27.4429	18.2533
1970Q4	5.4042	26.0585	20.6543	5.2277	26.5367	21.309	7.4735	21.265	13.7916	0	15.3583	15.3583	0	14.7007	14.7007
1971Q1	0	24.892	24.892	0	21.5506	21.5506	0	19.4595	19.4595	-2.1219	10.6577	12.7796	0	10.1189	10.1189
1971Q2	4.5707	25.5424	20.9717	0	11.4176	11.4176	0	13.2287	13.2287	0	10.8034	10.8034	-0.8492	8.0801	8.9294
1971Q3	-10.118	6.2319	16.35	-4.1445	10.3813	14.5258	0	15.0694	15.0694	-6.0635	9.0958	15.1593	-7.5877	4.0922	11.6799
1971Q4	-17.7298	0	17.7298	-8.7857	8.2432	17.0289	0	10.9492	10.9492	-8.9828	5.3921	14.3749	-16.9793	0	16.9793
1972Q1	-28.0323	1.7582	29.7905	-8.9828	1.7897	10.7725	-9.2314	3.3752	12.6067	-17.7298	0	17.7298	-16.9793	0	16.9793
1972Q2	-30.8202	-15.0653	15.7548	-16.9793	-5.2968	11.6825	-16.9793	0	16.9793	-17.7298	0	17.7298	-16.9793	0	16.9793
1972Q3	-16.2896	0	16.2896	-16.9793	0	16.9793	-17.7298	0	17.7298	-17.7298	0	17.7298	-13.2038	0	13.2038
1972Q4	-15.8414	-0.8421	14.9993	-18.0599	-8.597	9.4629	-17.0518	-8.4162	8.6356	-18.5494	0	18.5494	-18.1396	-8.18	9.9595
1973Q1	-18.5069	-6.4237	12.0833	-26.4819	-12.0027	14.4792	-17.7298	-5.1719	12.5578	-18.2972	-5.8859	12.4113	-17.7298	-3.9661	13.7636
1973Q2	-29.3933	-11.8651	17.5283	-19.005	-10.1517	8.8534	-18.5494	-8.7899	9.7595	-17.7298	-3.8742	13.8556	-17.7298	0	17.7298
1973Q3	-25.9316	-10.753	15.1786	-19.4481	-3.0648	16.3834	-9.9933	9.6275	19.6209	0	21.7872	21.7872	0	22.7738	22.7738
1973Q4	-59.8491	-34.39	25.4591	-27.3975	-12.6814	14.7161	-12.2922	25.6881	37.9803	0	29.4538	29.4538	14.0149	36.6798	22.6649
1974Q1	-36.7714	-16.6767	20.0947	0	44.5828	44.5828	16.9859	44.7001	27.7143	21.7453	41.6297	19.8844	11.5827	36.5945	25.0117
1974Q2	-22.7524	5.1515	27.9039	1.2618	28.9334	27.6716	0	37.9253	37.9253	7.2044	27.4429	20.2385	11.5827	31.781	20.1983
1974Q3	-27.3975	0	27.3975	-7.6155	27.4429	35.0584	0	31.781	31.781	12.6834	35.6806	22.9972	#N/A	#N/A	#N/A
1974Q4	-41.3818	-16.6767	24.7051	0	46.41	46.41	37.7363	107.36	69.6237	37.7363	77.2522	39.5159	27.4429	64.9798	37.5368
1975Q1	-7.6041	36.9465	44.5506	47.8211	107.36	59.5389	46.41	95.0755	48.6655	31.781	68.8888	37.1078	18.3165	60.1807	41.8642
1975Q2	2.051	63.8066	61.7555	46.41	107.36	60.95	36.6984	79.4914	42.793	22.0328	55.404	33.3712	15.2635	40.938	25.6745
1975Q3	22.5596	93.3822	70.8226	33.5181	72.0018	38.4837	18.5985	56.0631	37.4645	12.5537	45.6826	33.1289	14.1709	38.9913	24.8204
1975Q4	16.9859	41.6297	24.6438	15.0694	39.5882	24.5188	14.5231	32.7206	18.1976	13.5411	31.781	18.2399	5.9243	27.4429	21.5186
1976Q1	5.9685	31.781	25.8125	15.6584	36.0489	20.3905	14.5231	30.4682	15.9451	11.9278	27.4429	15.5152	2.4168	14.0149	11.5981
1976Q2	28.0821	50.2501	22.1679	14.5231	29.4538	14.9307	11.9278	26.5367	14.6089	4.7896	21.5506	16.761	0	20.3223	20.3223
1976Q3	21.0656	38.0329	16.9673	10.8748	28.413	17.5382	0	26.3625	26.3625	0	17.9647	17.9647	0	12.294	12.294
1976Q4	4.4937	34.0193	29.5256	0	13.774	13.774	4.7611	25.6881	20.9271	0	16.6828	16.6828	0	11.3851	11.3851
1977Q1	-25.5283	6.7582	32.2865	6.646	38.5085	31.8625	0	21.5506	21.5506	0	11.257	11.257	-18.8396	10.6577	29.4973
1977Q2	16.6828	47.3145	30.6316	0	16.2952	16.2952	0	18.1389	18.1389	-10.3804	8.6907	19.0711	-7.7632	10.3813	18.1445
1977Q3	0	10.9492	10.9492	-8.2855	8.6907	16.9762	-6.2318	10.6577	16.8895	-9.6312	2.2922	11.9234	-10.948	0	10.948
1977Q4	-18.3399	0	18.3399	-18.9988	0	18.9988	-17.93	3.6239	21.554	-18.5494	0	18.5494	-16.3421	0	16.3421
1978Q1	-36.8891	-12.0803	24.8088	-19.4481	6.2973	25.7455	-23.0534	-8.7857	14.2677	-20.438	0	20.438	-21.5335	0	21.5335
1978Q2	38.1286	91.5686	53.44	-27.2044	0	27.2044	-20.438	-3.0839	17.3541	-20.438	-10.4083	10.0297	-11.774	18.3837	30.1577
1978Q3	-34.1145	-14.2612	19.8532	-24.1165	-9.6312	14.4853	-30.124	-9.8686	20.2554	-19.4481	0	19.4481	-15.2082	7.077	22.2852
1978Q4	-22.7524	-14.5196	8.2328	-34.39	-14.2976	20.0924	-31.0895	-18.5494	12.5401	-21.5335	-8.0765	13.457	-17.7298	14.9569	32.6866
1979Q1	-53.4303	-22.2677	31.1627	-34.0857	0	34.0857	-24.2282	-6.6828	17.5454	-21.5335	0	21.5335	-10.8004	27.4429	38.2433
1979Q2	1.246	42.506	41.2599	-25.2385	-3.5594	21.6791	-22.7524	0	22.7524	-12.8886	26.29	39.1787	8.5363	27.4429	18.9067
1979Q3	-35.3357	-20.438	14.8977	-29.0819	-15.92	13.1618	-20.1513	11.6216	31.7729	8.6936	28.4484	19.7548	17.7376	30.9657	13.2281
1979Q4	-38.5877	-23.878	14.7096	-54.0044	-24.1165	29.8878	-34.1967	0	34.1967	0	54.7742	54.7742	16.9859	41.6297	24.6438
1980Q1	-45.4537	-23.4345	22.0192	-28.0914	15.0694	43.1608	-19.5837	23.7358	43.3194	-2.4921	57.3519	59.844	0	54.0591	54.0591
1980Q2	-71.5771	-51.0285	20.5486	-20.438	43.1108	63.5488	22.7738	59.5037	36.73	21.5506	79.7531	58.2024	29.4538	57.3519	27.8981
1980Q3	41.6297	89.3677	47.7381	14.6559	41.6297	26.9738	19.4595	52.4158	32.9563	31.781	45.6616	13.8806	27.4429	55.487	28.0441
1980Q4	-31.493	0	31.493	-15.0653	17.7376	32.8029	15.6584	52.4158	36.7574	21.8865	44.4481	22.5616	14.5231	32.7206	18.1976
1981Q1	-54.097	-20.8703	33.2268	-8.8504	34.5051	43.3555	13.6565	44.2343	30.5777	0	44.2343	44.2343	0	32.4211	32.4211
1981Q2	-29.9395	0	29.9395	9.1896	37.7363	28.5467	5.9243	42.9931	37.0688	3.1618	45.7107	42.5489	12.6834	31.781	19.0976
1981Q3	-42.236	-18.9882	23.2478	7.0149	70.5956	63.5807	33.9238	67.9861	34.0624	28.7027	64.6947	35.9919	28.0291	39.683	11.6539
1981Q4	-34.39	-7.9958	26.3942	10.6577	107.36	96.7023	29.4538	100.855	71.4013	26.7576	81.0639	54.3063	14.5231	52.4158	37.8927
1982Q1	0	52.4158	52.4158	29.4538	101.54	72.0859	23.0352	64.9798	41.9446	24.7823	56.0338	31.2515	0	31.2868	31.2868
1982Q2	0	46.002	46.002	22.9104	84.7319	61.8215	16.2192	51.0759	34.8567	0	36.0489	36.0489	7.2152	37.7363	30.5211
1982Q3	17.7376	72.3796	54.642	5.5486	46.41	40.8614	1.7314	41.6297	39.8982	3.1487	37.7363	34.5876	5.4251	34.5051	29.08
1982Q4	0	36.9712	36.9712	10.9051	39.5882	28.6831	17.5589	42.9573	25.3984	13.5534	38.6622	25.1088	1.2618	31.781	30.5193
1983Q1	16.9859	73.7768	56.7909	15.0694	33.0874	18.018	14.0149	29.4538	15.4389	0	14.5231	14.5231	2.6577	22.7738	20.1161
1983Q2	-30.8916	-15.5668	15.3248	0	27.4429	27.4429	0	16.4064	16.4064	0	18.6823	18.6823	9.6902	25.6881	15.998
1983Q3	-19.6598	9.8694	29.5291	-22.7524	-4.761	17.9913	-9.0335	25.6881	34.7217	0	29.4538	29.4538	0	20.9869	20.9869
1983Q4	-36.1637	-20.438	15.7257	-6.4668	18.6823	25.1491	0	23.0646	23.0646	0	20.4519	20.4519	-19.4481	4.7896	24.2377
1984Q1	0	23.0646	23.0646	-6.7202	14.9755	21.6958	-8.9828	7.0355	16.0183	-12.2922	0	12.2922	-18.5574	0	18.5574
1984Q2	-35.1345	-18.9882	16.1463	-19.9308	2.0253	21.9561	-18.8396	0	18.8396	-19.9308	0	19.9308	-11.8556	0	11.8556
1984Q3	-31.1247	-19.4481	11.6766	-24.4834	-8.8341	15.6492	-13.7711	0	13.7711	-14.1771	0	14.1771	-11.4489	2.5889	14.0377
1984Q4	-19.9859	7.4273	27.4132	-4.8476	17.5161	22.3637	-7.5201	24.1436	31.6637	-11.1929	11.257	22.4499	-15.1603	5.0945	20.2548
1985Q1	5.2277	41.0254	35.7977	1.1869	23.6194	22.4325	0	22.711	22.711	-10.4824	5.4876	15.97	-13.3135	0	13.3135
1985Q2	4.5447	19.1117	14.5669	-6.3979	6.7204	13.1183	-15.9653	0	15.9653	-18.2137	0	18.2137	-13.7733	3.2577	17.031
1985Q3	-12.8853	11.7873	24.6726	-10.5444	14.5231	25.0675	-10.4892	2.2662	12.7554	-10.6567	4.4937	15.1503	-12.1431	0	12.1431
1985Q4	7.4273	32.2049	24.7777	-2.216	11.9278	14.1437	0	9.6902	9.6902	0	13.0982	13.0982	-9.1366	8.8836	18.0202
1986Q1	4.7051	33.8361	29.131	-6.1678	11.3851	17.5529	0	13.316	13.316	-7.9561	2.2791	10.2352	-10.948	0	10.948
1986Q2	-7.801	11.5261	19.3271	-9.8686	6.1306	15.9992	-16.9278	0	16.9278	-18.5494	-1.9513	16.5981	-19.4481	0	19.4481
1986Q3	-15.7304	-4.1232	11.6073	-9.443	4.3955	13.8385	-10.6567	1.0554	11.712	-11.6517	2.0997	13.7514	-8.933	2.0887	11.0217
1986Q4	-12.9548	8.2	21.1548	-6.7204	0	6.7204	-6.7581	4.6482	11.4062	-2.2871	5.7958	8.0829	-8.5359	0	8.5359
1987Q1	4.7896	17.8504	13.0608	-2.4168	4.7896	7.2064	-4.6775	0	4.6775	-6.8742	4.7051	11.5792	-4.4686	11.9278	16.3963
1987Q2	-21.3099	0	21.3099	-11.1019	0	11.1019	-11.0393	0	11.0393	-6.9538	0	6.9538	-4.5072	2.5178	7.025
1987Q3	-2.4614	10.3144	12.7758	-2.4767	0	2.4767	-7.1612	2.5396	9.7008	-4.705	4.9071	9.6121	-4.6235	2.4023	7.0258
1987Q4	-18.3375	0	18.3375	-12.1431	0	12.1431	-4.968	2.6577	7.6256	-7.2477	14.0149	21.2626	-10.948	5.516	16.464
1988Q1	-14.7874	8.1316	22.919	-5.262	17.6077	22.8697	-2.6577	15.865	18.5227	-7.3814	5.516	12.8973	-5.593	13.5411	19.1341
1988Q2	0	20.304	20.304	-7.5201	13.5411	21.0612	-11.9262	0	11.9262	-15.3539	0	15.3539	-5.5159	2.8468	8.3627
1988Q3	-5.2968	8.4166	13.7134	-7.9693	0	7.9693	-11.0234	0	11.0234	-13.724	0	13.724	-2.768	5.516	8.284
1988Q4	-7.8649	14.5231	22.388	-10.948	0	10.948	-5.2968	13.5411	18.8379	-5.593	9.2605	14.8535	-12.6814	0	12.6814
1989Q1	-9.9918	7.9696	17.9614	-16.3847	-7.6641	8.7206	-11.9262	-2.768	9.1582	-10.8737	0	10.8737	-1.3936	1.3467	2.7404
1989Q2	-28.0323	-10.118	17.9142	-5.4409	0	5.4409	-10.3804	2.8068	13.1872	-5.4409	14.5231	19.964	-1.4034	14.6573	16.0607
1989Q3	0	18.8496	18.8496	-2.7873	14.5231	17.3104	-5.593	14.5231	20.1161	-2.8068	13.7267	16.5336	0	8.0229	8.0229
1989Q4	-12.7634	19.1497	31.9131	0	16.2952	16.2952	0	14.5231	14.5231	2.6754	16.9859	14.3104	0	15.4174	15.4174
1990Q1	6.1521	22.7738	16.6217	-2.8468	12.4857	15.3324	-2.8672	11.9278	14.795	-10.948	8.7861	19.7342	-5.6723	17.8694	23.5416
1990Q2	-30.0818	-24.8614	5.2204	-12.6814	0	12.6814	-14.2107	0	14.2107	6.3473	17.7376	11.3903	0	6.6644	6.6644
1990Q3	-15.6536	0	15.6536	-6.3979	13.2698	19.6677	8.2432	17.7376	9.4944	6.0589	19.5791	13.5201	5.832	17.2903	11.4583
1990Q4	-25.4507	-13.3135	12.1372	-14.2612	11.3635	25.6248	0	19.2519	19.2519	8.506	30.1909	21.6849	8.329	32.0979	23.7689
1991Q1	-24.5096	-3.7554	20.7542	8.329	22.6043	14.2753	18.6162	41.6297	23.0135	13.2062	37.7363	24.5301	10.8582	25.4389	14.5807
1991Q2	18.776	57.8466	39.0705	22.9912	49.2323	26.2411	18.5588	36.8734	18.3147	6.8352	30.4449	23.6097	7.5015	22.5604	15.0589
1991Q3	23.3967	49.7879	26.3912	11.9947	30.996	19.0013	6.7158	26.726	20.0102	6.7293	26.3657	19.6364	1.0615	17.7376	16.6761
1991Q4	-2.2748	17.9178	20.1926	8.2125	21.5506	13.3382	11.1525	24.5988	13.4463	8.5894	27.5737	18.9843	0	17.7376	17.7376
1992Q1	4.102	25.2271	21.1251	7.9395	19.4973	11.5578	10.2049	25.6882	15.4833	1.0874	16.9859	15.8984	0	17.5082	17.5082
1992Q2	-7.9047	13.1412	21.0459	0	16.2952	16.2952	4.1812	15.6584	11.4772	0	13.1612	13.1612	-0.9074	9.2777	10.1851
1992Q3	9.7011	30.7781	21.0771	7.7909	29.4538	21.6629	6.5445	20.11	13.5655	3.561	15.6584	12.0974	0	11.463	11.463
1992Q4	7.9035	30.3205	22.417	5.8096	21.7453	15.9357	6.1997	17.7376	11.5378	3.137	12.7258	9.5888	0	9.4055	9.4055
1993Q1	2.7413	19.4761	16.7347	6.3098	15.5467	9.2369	3.4492	11.249	7.7999	0.6349	9.3241	8.6892	0	7.3253	7.3253
1993Q2	22.2477	59.8753	37.6277	7.0879	24.3528	17.265	0.3059	15.4174	15.1114	-4.403	7.7979	12.2008	0	9.4055	9.4055
1993Q3	5.9439	29.2448	23.3009	6.2973	15.5369	9.2396	0.8775	9.1896	8.3121	0	6.502	6.502	0	6.1521	6.1521
1993Q4	8.2498	27.3737	19.1239	0	7.2831	7.2831	0	9.4055	9.4055	-0.6061	6.1521	6.7581	-5.593	2.8672	8.4602
1994Q1	-21.3318	-5.361	15.9707	2.3479	23.2214	20.8736	-6.3956	4.9351	11.3307	-5.7709	4.1814	9.9523	-8.8504	2.4904	11.3408
1994Q2	13.1714	31.9109	18.7396	-13.3172	1.2907	14.6079	-7.752	2.5232	10.2752	-7.6883	0.6633	8.3517	-3.404	4.5947	7.9987
1994Q3	-15.6536	-2.749	12.9047	-11.0234	0	11.0234	-8.4162	0	8.4162	-7.7133	1.3223	9.0356	-4.9748	2.9606	7.9354
1994Q4	-18.8396	-2.5253	16.3143	-15.7562	-5.2276	10.5286	-10.948	-0.8807	10.0673	-6.8554	0	6.8554	-5.8807	1.3205	7.2013
1995Q1	-24.7206	-13.1372	11.5834	-18.3076	-7.1755	11.1321	-11.9593	0	11.9593	-8.9161	-2.9089	6.0072	-7.0768	2.4152	9.492
1995Q2	-9.2178	4.3884	13.6062	1.2303	15.4927	14.2624	-5.9915	6.1578	12.1494	-8.0351	3.1494	11.1845	-9.0505	6.3473	15.3978
1995Q3	4.8576	27.6124	22.7548	-1.4336	12.2059	13.6395	-7.5913	7.6127	15.204	-4.4531	5.7914	10.2445	-6.9381	2.8879	9.826
1995Q4	-4.4779	5.8167	10.2946	-5.1672	2.857	8.0242	-5.593	2.9518	8.5448	-8.4162	1.1412	9.5574	-5.7955	1.4109	7.2064
1996Q1	-8.9149	7.7294	16.6444	-2.3511	8.9833	11.3344	-13.5385	0	13.5385	-11.0625	0	11.0625	-8.9759	2.9302	11.9061
1996Q2	-18.4559	0.5461	19.002	-13.4476	-5.5159	7.9317	-13.7711	-2.9518	10.8193	-8.7218	1.3591	10.081	-7.9876	2.9302	10.9178
1996Q3	-16.1665	-6.6976	9.4689	-13.32	-4.0293	9.2907	-10.1357	-2.0034	8.1323	-8.6527	0	8.6527	-8.1312	5.7064	13.8376
1996Q4	-17.1607	-5.6886	11.4721	-8.0821	-0.2697	7.8124	-10.0241	0	10.0241	-8.1805	2.5983	10.7788	-5.5585	2.8481	8.4066
1997Q1	-5.2858	6.0963	11.3821	-8.3576	2.768	11.1256	-6.835	2.1621	8.9971	-5.5159	0	5.5159	-5.6965	0	5.6965
1997Q2	-10.9044	1.6701	12.5745	-10.948	-1.6427	9.3054	-9.5006	0	9.5006	-7.8649	0	7.8649	-5.947	1.108	7.055
1997Q3	-8.337	5.6764	14.0134	-9.8686	1.3961	11.2648	-8.8504	0.2975	9.1479	-5.6154	0	5.6154	-5.8807	3.0187	8.8994
1997Q4	-5.9243	2.2221	8.1464	-5.4041	1.3865	6.7906	-5.5159	0	5.5159	-5.8807	0	5.8807	-5.9684	0	5.9684
1998Q1	-13.8905	1.0526	14.9431	-7.8649	2.6754	10.5403	-7.5201	1.3302	8.8503	-8.1312	0	8.1312	-11.0998	0	11.0998
1998Q2	-20.7906	-2.4921	18.2985	-12.4837	0	12.4837	-13.0571	-4.5838	8.4734	-6.7632	0	6.7632	-5.7136	1.2048	6.9184
1998Q3	-12.4339	4.1553	16.5892	-10.5479	-2.4182	8.1297	-12.1448	-3.2427	8.9021	-10.557	0	10.557	-5.338	0	5.338
1998Q4	-20.7129	-7.1527	13.5603	-14.6971	-2.881	11.8161	-11.9262	0	11.9262	-12.2922	-0.8313	11.4609	-10.3804	0	10.3804
1999Q1	-18.7278	-3.9536	14.7742	-13.6005	-4.6913	8.9092	-12.5177	-3.6803	8.8374	-9.3144	-1.1396	8.1748	-7.6979	0	7.6979
1999Q2	-26.7199	-9.0505	17.6694	-16.9227	-4.4937	12.4291	-14.094	-5.4409	8.6532	-11.9262	0	11.9262	-7.9693	0	7.9693
1999Q3	-8.7948	6.2541	15.0489	-14.8352	0	14.8352	-9.872	-0.9318	8.9402	-11.8291	-2.4495	9.3796	-7.5723	1.4403	9.0126
1999Q4	-18.3733	-8.6371	9.7362	-10.948	0	10.948	-9.8686	0	9.8686	-7.0768	0.8377	7.9145	-7.2042	0.5895	7.7937
2000Q1	-18.0184	-2.6385	15.3799	-14.8178	-2.433	12.3848	-10.4709	0	10.4709	-8.7961	-4.968	3.8281	-5.5159	0	5.5159
2000Q2	-22.2957	-6.3616	15.9342	-16.743	-4.6235	12.1195	-11.9262	-2.3598	9.5664	-8.2223	0	8.2223	-8.1344	3.1957	11.3301
2000Q3	-16.1564	-0.2496	15.9068	-12.5228	-1.248	11.2747	-8.7917	-2.5558	6.2359	-5.0945	5.441	10.5354	-2.5838	2.1094	4.6932
2000Q4	-7.1354	6.1624	13.2977	-6.5018	5.516	12.0178	-7.0992	7.0062	14.1054	-2.7873	5.5708	8.3581	-2.0037	6.8917	8.8954
2001Q1	-11.7656	0.5145	12.2801	-7.4732	5.1602	12.6335	0	10.1925	10.1925	0	11.5827	11.5827	0	6.502	6.502
2001Q2	-20.2208	-6.1959	14.0248	-9.7212	2.1066	11.8277	-5.4621	2.4464	7.9085	-2.388	5.441	7.8289	0	5.3322	5.3322
2001Q3	-16.0981	-2.9107	13.1874	-7.2479	2.4337	9.6817	-4.5939	5.7565	10.3504	0	6.0109	6.0109	-4.3865	1.6653	6.0519
2001Q4	-24.2661	-8.2629	16.0032	-8.9828	3.9665	12.9493	0	11.4995	11.4995	-0.3939	12.4494	12.8433	-1.3244	10.8157	12.1401
2002Q1	-11.4405	4.3992	15.8397	-6.5018	2.5396	9.0414	-2.5722	5.1602	7.7325	0	5.4782	5.4782	-0.506	5.7333	6.2393
2002Q2	-27.3443	-13.7984	13.5459	-11.7537	0.234	11.9877	-5.4845	0.7248	6.2093	-1.2214	5.2277	6.449	-0.981	3.2673	4.2482
2002Q3	-11.7478	0.4834	12.2312	-9.0876	0.4843	9.5718	-8.1513	2.4315	10.5828	-4.6235	2.6935	7.3169	-2.6228	0.7626	3.3854
2002Q4	-13.9654	-1.6302	12.3352	-11.2558	0	11.2558	-4.9013	3.8949	8.7962	-4.6775	2.983	7.6606	-3.6108	4.9651	8.5759
2003Q1	-19.4577	-7.1232	12.3344	-11.2558	0	11.2558	-9.4893	2.4389	11.9282	-6.1924	2.3388	8.5311	-4.117	1.82	5.937
2003Q2	-16.645	-6.2376	10.4074	-9.0335	0	9.0335	-11.2558	2.3598	13.6156	-6.8559	1.4117	8.2677	-2.2333	5.0305	7.2638
2003Q3	-5.2336	1.8702	7.1038	-11.2558	-1.7149	9.5409	-9.35	-0.2393	9.1107	-4.5707	0	4.5707	-2.8234	0.2301	3.0534
2003Q4	-18.4759	-4.4215	14.0544	-13.025	-4.3709	8.654	-10.948	-2.3214	8.6266	-9.8964	-1.1994	8.697	-8.8832	0	8.8832
2004Q1	-27.8709	-7.8001	20.0708	-19.4481	-5.8654	13.5827	-16.4567	-5.1782	11.2786	-12.2922	-2.2791	10.0131	-7.912	0	7.912
2004Q2	-15.463	3.8623	19.3253	-16.3654	-9.6368	6.7287	-18.7101	-4.6412	14.0689	-11.0691	0	11.0691	-8.4302	0	8.4302
2004Q3	-13.297	-1.8696	11.4274	-17.7298	-2.8688	14.861	-12.35	-0.2092	12.1409	-8.5693	0	8.5693	-7.5133	0	7.5133
2004Q4	-15.8324	-4.3971	11.4353	-11.6374	-4.0811	7.5563	-9.8428	-2.0779	7.765	-10.4892	-1.6597	8.8294	-9.2285	0	9.2285
2005Q1	-11.5136	-3.1256	8.3879	-10.118	0	10.118	-12.4867	-1.6718	10.8148	-9.3868	0	9.3868	-7.6992	0	7.6992
2005Q2	-22.0684	-10.1413	11.9271	-15.9653	-2.1457	13.8196	-11.2332	-2.6934	8.5398	-12.0185	-4.8121	7.2064	-12.2001	-1.8968	10.3033
2005Q3	-8.3714	2.0029	10.3743	-9.6687	-0.5976	9.0711	-12.2174	-3.3797	8.8377	-13.8733	-0.7828	13.0905	-9.5167	0.1984	9.7151
2005Q4	-17.222	-3.623	13.5991	-15.3309	-1.9753	13.3556	-15.8866	-0.5906	15.296	-12.8963	-2.0234	10.8729	-10.1469	-0.0969	10.0499
2006Q1	-15.6897	-1.9512	13.7385	-15.2082	-3.2824	11.9259	-10.6567	-2.1107	8.5459	-9.9175	0	9.9175	-6.7202	0	6.7202
2006Q2	-35.5684	-19.2632	16.3052	-18.8102	-4.7895	14.0207	-14.0119	0	14.0119	-8.6434	0.2268	8.8702	-6.3304	1.7898	8.1202
2006Q3	-15.6068	-4.6041	11.0026	-12.3554	0	12.3554	-5.7539	0	5.7539	-6.0101	0	6.0101	-5.2276	0.4574	5.685
2006Q4	-20.41	-5.7139	14.6961	-10.6876	2.4464	13.134	-7.1187	0	7.1187	-3.9391	6.954	10.8931	-0.5047	5.1937	5.6985
2007Q1	-13.1118	7.7158	20.8276	-4.6376	6.5108	11.1484	-0.2947	8.215	8.5097	0.9791	10.8896	9.9105	1.9016	13.4139	11.5123
2007Q2	-11.1972	10.1331	21.3303	-11.3615	5.1573	16.5188	0	8.6198	8.6198	0	11.5827	11.5827	0	8.2432	8.2432
2007Q3	-18.9942	-3.243	15.7512	-13.0959	0	13.0959	-6.835	3.5059	10.3409	0	10.2866	10.2866	1.4679	16.9859	15.518
2007Q4	-31.2761	-13.0006	18.2754	-24.6083	5.8566	30.4649	-14.2721	10.1115	24.3836	0	19.2501	19.2501	0	24.4206	24.4206
2008Q1	-43.0231	-16.5801	26.443	-14.0734	8.4166	22.49	-5.8245	29.7299	35.5544	3.4447	27.3785	23.9338	9.4055	35.8945	26.489
2008Q2	-35.7141	-14.5856	21.1285	-19.4481	10.6577	30.1058	0	24.7387	24.7387	5.7531	30.2717	24.5186	4.5027	36.3599	31.8571
2008Q3	-38.4263	-8.2612	30.1651	-16.006	9.5073	25.5134	-2.1287	22.7738	24.9025	1.755	23.5764	21.8214	10.3813	25.2838	14.9026
2008Q4	-37.0361	-12.558	24.4781	-20.5425	2.4374	22.98	-5.2276	16.9859	22.2135	4.5304	38.0099	33.4795	8.5974	30.4323	21.8349
2009Q1	-52.3601	-11.6487	40.7115	-14.4201	18.3885	32.8086	6.9809	64.3391	57.3581	21.6367	70.5956	48.9589	18.335	70.5956	52.2606
2009Q2	-24.1994	22.3049	46.5044	4.5882	57.1599	52.5717	18.5588	74.5409	55.9822	28.7004	85.2623	56.5619	26.0116	57.078	31.0664
2009Q3	15.4793	56.3984	40.9191	17.0763	45.8464	28.7701	17.2293	86.2537	69.0245	17.7062	46.41	28.7038	17.0633	54.7742	37.7109
2009Q4	6.954	47.3145	40.3605	22.6071	67.8467	45.2396	22.8488	40.8793	18.0305	22.6045	47.3323	24.7277	24.0982	49.3482	25.25
2010Q1	28.6379	64.0707	35.4328	24.0123	73.4095	49.3971	21.1129	70.5956	49.4827	27.4429	62.8337	35.3908	13.9404	53.8813	39.9409
2010Q2	5.2881	34.9416	29.6535	13.5591	69.2	55.6409	17.5934	61.8519	44.2585	14.6783	60.1807	45.5024	15.9704	52.7655	36.795
2010Q3	-13.836	27.7421	41.578	13.316	44.292	30.976	15.6584	46.41	30.7516	18.5588	58.2652	39.7065	17.7376	59.7025	41.965
2010Q4	1.0064	26.7824	25.7759	13.5411	35.3413	21.8002	16.2952	56.5913	40.2962	16.7652	36.0293	19.2641	18.791	41.5198	22.7288
2011Q1	9.2249	42.6856	33.4607	22.351	63.2984	40.9475	17.3373	46.8904	29.5531	19.9434	47.633	27.6897	12.4857	46.41	33.9243
2011Q2	0.2831	28.9946	28.7114	14.7912	48.2545	33.4633	14.7609	47.6438	32.8829	8.969	35.6199	26.651	11.5132	35.5193	24.0061
2011Q3	2.8068	25.7852	22.9783	6.8352	27.4429	20.6077	7.6555	24.6671	17.0117	10.2923	35.7293	25.4369	11.1406	33.5469	22.4063
2011Q4	-4.4951	14.1754	18.6704	6.4487	16.2903	9.8416	10.9724	27.4429	16.4705	10.7021	28.0017	17.2996	12.3616	34.2854	21.9237
2012Q1	1.2552	21.6564	20.4012	6.2326	18.9311	12.6985	6.5015	27.4628	20.9613	6.837	21.5978	14.7607	9.1354	33.9261	24.7907
2012Q2	-1.1594	14.0792	15.2386	9.3085	23.2811	13.9726	6.1997	24.5657	18.3659	6.7307	26.5247	19.794	5.6724	29.4538	23.7815
2012Q3	5.047	20.9565	15.9094	9.3027	25.6911	16.3884	6.646	18.0369	11.3909	5.5578	25.156	19.5983	6.0134	23.3345	17.3211
2012Q4	10.0255	31.6407	21.6153	6.5108	23.0472	16.5364	10.1189	26.7131	16.5943	9.6319	27.4429	17.811	8.9833	20.9554	11.9721
2013Q1	0.8938	22.647	21.7531	9.2855	23.6691	14.3836	9.9512	22.8766	12.9254	9.9512	29.9579	20.0068	8.7382	30.1909	21.4528
2013Q2	-2.4539	18.3857	20.8395	9.6319	23.196	13.5641	9.4055	23.4138	14.0083	11.8635	25.4556	13.592	10.5454	23.938	13.3926
2013Q3	24.7824	68.3891	43.6067	10.7948	36.4717	25.6769	14.9889	29.7653	14.7764	6.7204	27.7133	20.9929	9.4881	23.9498	14.4616
2013Q4	11.1942	34.01	22.8159	9.0602	41.045	31.9848	10.9489	34.3583	23.4095	10.9817	29.3203	18.3385	9.181	28.2717	19.0907
2014Q1	-7.0949	25.2427	32.3376	9.0312	34.6581	25.6269	8.0878	32.8145	24.7267	5.5805	30.0449	24.4644	5.1391	23.8369	18.6978
2014Q2	21.9776	73.9469	51.9693	10.1189	42.3482	32.2293	6.5732	39.5882	33.015	6.2255	31.981	25.7555	6.9128	25.6633	18.7505
2014Q3	5.4126	24.4105	18.9979	9.7	39.3574	29.6574	8.0363	28.7454	20.7091	5.8664	25.925	20.0586	5.516	20.2795	14.7636
2014Q4	4.3666	21.4602	17.0936	6.219	23.3414	17.1224	3.9404	23.5534	19.613	7	20.7745	13.7745	3.3055	19.4595	16.154
2015Q1	-2.1558	14.6883	16.8441	7.9013	23.1071	15.2058	10	28.2282	18.2282	7.7578	16.73	8.9722	4.9811	15.0072	10.0261
2015Q2	15	66.0641	51.0641	13.2719	37.2755	24.0036	7.4388	23.6691	16.2303	4.3043	18.0369	13.7325	7.3703	16.9859	9.6156
2015Q3	-4.6674	17.5269	22.1943	6.6824	23.4845	16.8021	5.5528	16.7027	11.1499	6.9757	19.3033	12.3276	3.0416	14.5231	11.4815
2015Q4	1.7326	22.6645	20.9319	3.3683	12.2931	8.9248	6.4481	15.0533	8.6052	3.3901	12.5641	9.174	4.6514	13.6004	8.949
2016Q1	6.1382	25.8361	19.6979	6.2995	19.6624	13.3629	4.2409	14.2862	10.0453	4.8526	14.0589	9.2064	1.7057	11.4878	9.782
2016Q2	5.0332	25.8361	20.8029	4.5	16.1164	11.6164	3.4629	16.0686	12.6057	0	13.233	13.233	3.265	13.2679	10.0029
2016Q3	3.6519	17.4161	13.7642	3.2425	16.95	13.7075	2.8203	14.6391	11.8188	3.265	15.3071	12.042	2.714	10.9645	8.2505
2016Q4	4.9435	25.006	20.0624	2.6233	13.0018	10.3785	5.5356	12.591	7.0554	1.8185	9.1072	7.2887	1.1772	9.2056	8.0284
2017Q1	-5.0301	10.9972	16.0273	3.5087	15.2481	11.7395	3.3247	10.5009	7.1761	2.3132	9.2432	6.93	1.4164	9.2581	7.8417
2017Q2	-0.9543	14.6857	15.6399	1.1938	9.7889	8.5951	1.6494	8.488	6.8385	1.1748	9.4798	8.305	1.2001	9.8694	8.6693
2017Q3	12.957	27.546	14.589	1.3	10.4786	9.1786	0	9.8999	9.8999	1.9464	13.0982	11.1518	1.5968	6.1997	4.603
2017Q4	5.6082	26.6152	21.0069	2.3408	13.9722	11.6314	1.4684	9.7638	8.2953	1.2545	7.6596	6.405	0.7633	6.585	5.8217
2018Q1	-1.5892	9.6	11.1892	1.5968	9.7492	8.1524	0.3189	6.5597	6.2409	0.6679	6.9294	6.2615	1.5238	6.7687	5.2449
2018Q2	-8.2307	6.8458	15.0766	-1.5066	6.4754	7.9819	0	6.8845	6.8845	0.8652	10.2721	9.4068	0.3463	6.954	6.6077
2018Q3	1.5154	13.7587	12.2433	-0.3078	9.7889	10.0967	-0.7815	6.9524	7.7339	-0.0633	7.5111	7.5744	-0.9444	5.8808	6.8252
2018Q4	4.5087	23.3099	18.8012	-0.9487	9.9518	10.9006	0	8.8457	8.8457	-0.335	6.1759	6.5109	-1.8842	5.0033	6.8875
2019Q1	11.9865	31.6305	19.644	-3.1017	8.8762	11.9779	-2.7845	5.9279	8.7124	0	4.8571	4.8571	-3.2009	4.0507	7.2516
2019Q2	-4.2	16.7145	20.9145	0	10.1189	10.1189	0	8.9911	8.9911	0	6.8969	6.8969	0	4.8281	4.8281
2019Q3	-7.0877	8.8292	15.9169	-1.3873	3.265	4.6524	-3.6443	3.2645	6.9088	0	3.495	3.495	-1.5904	5.2736	6.864
2019Q4	-3.6919	5.7356	9.4275	-4.1408	2.2945	6.4353	-1.2432	3.2126	4.4558	-2.8504	3.5463	6.3967	-1.7204	1.9118	3.6322
2020Q1	-24.327	4.2292	28.5562	-4.8892	4.4819	9.3712	-2.1149	4.2928	6.4077	-2.5128	2.9798	5.4927	-0.5404	2.996	3.5364
2020Q2	-92.5679	-69.6587	22.9093	-1.9572	160.007	161.964	14.5132	51.4895	36.9763	4.452	46.1836	41.7316	2.6408	38.5666	35.9258
2020Q3	34.8597	92.6719	57.8123	3.2126	32.7668	29.5542	0	18.1897	18.1897	1.6913	16.0059	14.3146	0	14.9885	14.9885
2020Q4	-16.9793	7.1785	24.1578	-10.948	10.6043	21.5523	-2.1663	4.7594	6.9257	-0.3147	4.9475	5.2623	0	4.7961	4.7961
2021Q1	-26.2047	4.0446	30.2493	-9.7415	5.7956	15.5371	-5.4824	11.7527	17.2351	-1.2714	4.6267	5.898	-3.0416	3.4217	6.4633
2021Q2	-12.5095	20.2212	32.7307	-8.6227	3.9198	12.5425	-7.6155	2.4315	10.047	-7.4919	2.3562	9.8481	-3.2857	2.2408	5.5265
2021Q3	-1.2694	25.7503	27.0197	-6.0902	2.5396	8.6297	-7.3362	2.5235	9.8598	-1.5925	4.5707	6.1632	-3.3967	2.5396	5.9363
2021Q4	-8.8832	12.5397	21.4228	-1.2917	4.8476	6.1393	-4.0158	4.8063	8.8221	-5.3653	1.7817	7.147	-4.907	1.7458	6.6528

## Sheet: RGDP
Measures of Cross-Sectional Dispersion for Quarterly Forecasts for REAL GDP (RGDP)
Units: Annualized Percentage Points
Dispersion Measure D2 = 75th Percentile Minus 25th Percentile of the Forecasts for Q/Q Growth
P25 = 25th Percentile of the Forecasts for Q/Q Growth
P75 = 75th Percentile of the Forecasts for Q/Q Growth
At Each Survey Date T, the Quarterly Horizons Are T, T+1, T+2, T+3, and T+4
Survey_Date(T)	RGDP_P25_D2(T)	RGDP_P75_D2(T)	RGDP_D2(T)	RGDP_P25_D2(T+1)	RGDP_P75_D2(T+1)	RGDP_D2(T+1)	RGDP_P25_D2(T+2)	RGDP_P75_D2(T+2)	RGDP_D2(T+2)	RGDP_P25_D2(T+3)	RGDP_P75_D2(T+3)	RGDP_D2(T+3)	RGDP_P25_D2(T+4)	RGDP_P75_D2(T+4)	RGDP_D2(T+4)
1968Q4	0.3263	3.1619	2.8356	1.218	3.5688	2.3509	1.693	3.4838	1.7908	3.3653	4.874	1.5088	3.3265	5.5398	2.2133
1969Q1	0.7979	3.0911	2.2931	1.286	3.4989	2.2129	2.0625	4.316	2.2534	2.8875	5.516	2.6284	#N/A	#N/A	#N/A
1969Q2	2.5625	3.9128	1.3502	1.6101	3.3696	1.7594	0.726	3.5161	2.7902	1.1474	3.8437	2.6963	#N/A	#N/A	#N/A
1969Q3	-0.1216	2.913	3.0346	0.2955	2.8586	2.5631	0.3002	3.137	2.8368	1.1312	3.5782	2.447	#N/A	#N/A	#N/A
1969Q4	-1.09	1.5772	2.6671	-1.8804	1.5414	3.4218	-1.0861	1.938	3.0241	1.484	3.577	2.0931	2.3738	4.723	2.3492
1970Q1	-1.8677	0.7206	2.5882	-0.6658	1.9432	2.609	1.1339	3.5429	2.4091	2.7298	4.3697	1.6399	#N/A	#N/A	#N/A
1970Q2	-1.3961	1.1326	2.5287	0.5965	3.4905	2.894	2.2284	4.3585	2.1301	3.0021	4.609	1.6069	2.1771	4.9108	2.7337
1970Q3	1.1393	3.6346	2.4954	0.7034	3.5706	2.8672	2.0162	4.392	2.3758	2.1616	4.23	2.0684	2.5706	4.8666	2.296
1970Q4	-1.9576	-0.1085	1.8491	3.2942	7.6513	4.3571	3.094	4.9218	1.8278	1.3728	4.0298	2.657	2.9581	5.1851	2.227
1971Q1	5.4477	7.8813	2.4336	3.1355	5.5352	2.3997	0.6037	3.2478	2.6441	4.0729	5.592	1.5191	4.1421	6.3482	2.2061
1971Q2	3.5144	6.1103	2.5959	1.0739	3.6353	2.5614	4.2184	6.3065	2.0881	4.0833	7.0423	2.9589	4.1121	6.5349	2.4228
1971Q3	4.3104	7.2173	2.907	4.6096	6.8865	2.277	4.8844	6.7717	1.8872	4.2022	6.7421	2.54	3.7061	6.3439	2.6378
1971Q4	3.8134	5.9474	2.1341	4.6576	7.0027	2.3451	4.8787	6.6186	1.7399	4.4939	6.5417	2.0478	4.7382	6.8443	2.1062
1972Q1	5.0673	7.4153	2.348	5.4615	7.4065	1.945	5.2267	6.9301	1.7035	4.6171	6.628	2.0109	4.3157	5.9142	1.5984
1972Q2	6.1412	8.1873	2.046	5.803	7.2015	1.3985	5.0726	6.4508	1.3781	4.1689	6.288	2.1191	3.9768	5.7942	1.8175
1972Q3	5.62	6.8609	1.241	5.1906	6.7093	1.5186	4.8554	6.2433	1.3878	4.9346	5.7965	0.8619	3.6259	5.0612	1.4352
1972Q4	6.1632	7.3762	1.213	5.2621	6.6151	1.3531	5.0138	6.2833	1.2695	4.0261	5.2572	1.2311	3.1844	4.8707	1.6863
1973Q1	4.8122	6.029	1.2167	5.0247	6.1119	1.0872	3.6571	5.0569	1.3997	2.875	4.7316	1.8565	2.8077	4.7566	1.9489
1973Q2	4.0989	6.4262	2.3273	3.2664	4.9797	1.7134	2.9616	4.1024	1.1408	2.2329	4.2243	1.9914	2.0478	4.1671	2.1194
1973Q3	1.8043	3.3832	1.5789	0.892	2.3931	1.5011	0.9585	2.7374	1.7789	1.2166	3.2474	2.0308	3.031	4.2059	1.1749
1973Q4	1.0244	2.535	1.5106	-1.5381	0.7994	2.3374	-1.0878	1.6432	2.7311	0.554	3.0401	2.4862	1.712	3.9733	2.2614
1974Q1	-3.7713	-1.1457	2.6256	-1.23	0.9486	2.1786	0.8724	2.8957	2.0233	2.3841	5.5177	3.1337	2.0752	5.298	3.2228
1974Q2	-1.4331	0.9085	2.3416	0.6442	2.7424	2.0982	1.4947	4.698	3.2033	2.6216	4.7536	2.132	3.5447	5.5411	1.9964
1974Q3	-1.2094	1.0986	2.308	0.6029	2.3361	1.7332	1.4381	3.2309	1.7928	1.4306	3.5512	2.1206	#N/A	#N/A	#N/A
1974Q4	-5.9795	-2.3886	3.5909	-2.6329	-0.5625	2.0704	-0.3015	2.4855	2.787	1.9785	4.1778	2.1993	3.4291	5.7265	2.2974
1975Q1	-6.958	-3.421	3.537	-2.1947	0.3491	2.5438	1.2502	5.4068	4.1566	3.3495	5.9673	2.6178	2.8267	6.3976	3.571
1975Q2	-2.2669	0.961	3.2279	0.5654	5.2509	4.6855	4.1325	7.0476	2.915	4.5366	7.0848	2.5482	4.5914	7.1399	2.5485
1975Q3	3.0891	7.9766	4.8874	4.5107	7.9713	3.4605	4.6398	7.0569	2.4171	4.971	7.0571	2.0861	4.9258	6.7994	1.8736
1975Q4	3.6735	6.444	2.7705	3.8379	7.1967	3.3588	4.3048	6.0737	1.7689	3.8282	6.0248	2.1966	3.8314	6.1081	2.2768
1976Q1	4.8128	6.4413	1.6284	4.3872	6.2639	1.8767	4.6464	6.3789	1.7325	4.8086	6.2361	1.4275	4.5602	5.5569	0.9967
1976Q2	4.1744	6.3686	2.1941	4.4522	6.2047	1.7525	4.884	6.3841	1.5001	4.5699	6.0942	1.5243	2.5731	5.6233	3.0501
1976Q3	4.1601	6.3557	2.1956	5.1334	6.5018	1.3684	4.5623	5.9758	1.4135	4.496	5.6462	1.1502	3.6071	5.304	1.6969
1976Q4	4.0055	5.8194	1.8139	4.2075	5.9766	1.7691	4.6814	5.6801	0.9987	4.2347	5.8392	1.6045	3.8057	5.677	1.8713
1977Q1	2.1079	5.0463	2.9384	4.4271	7.8971	3.4699	4.6211	7.129	2.508	3.2935	5.9972	2.7037	2.3315	5.4143	3.0827
1977Q2	4.9296	7.2445	2.3149	5.343	6.733	1.39	4.3083	5.9852	1.677	4.0889	5.6194	1.5305	3.4614	5.2433	1.7818
1977Q3	4.204	5.6829	1.4789	3.7608	5.895	2.1342	3.8019	5.0036	1.2016	3.2761	5.0866	1.8105	2.9193	4.8002	1.8809
1977Q4	3.9487	5.1969	1.2482	3.5642	5.0919	1.5277	3.2099	5.0198	1.8098	2.874	4.711	1.837	2.6884	4.5098	1.8213
1978Q1	3.513	5.0152	1.5022	3.1715	4.9843	1.8128	3.0448	4.763	1.7182	2.0222	4.325	2.3028	2.9608	5.039	2.0783
1978Q2	5.1186	8.4759	3.3573	3.0238	4.9678	1.944	2.2224	4.4669	2.2445	0.6524	4.0878	3.4355	0.6699	3.5989	2.929
1978Q3	2.9137	4.2282	1.3145	1.9524	3.2407	1.2883	-0.2313	3.0664	3.2977	0.671	2.9551	2.2842	-0.0073	2.989	2.9963
1978Q4	1.9906	4.1483	2.1576	0.5663	3.6334	3.0672	-0.2996	2.658	2.9576	-0.0549	2.1003	2.1553	-0.9168	2.8269	3.7437
1979Q1	1.204	3.0871	1.8831	0.8454	2.3672	1.5218	-1.7626	1.1133	2.8759	-1.4636	1.4235	2.8871	-0.5226	3.282	3.8046
1979Q2	-0.3269	2.921	3.2479	-2.2803	1.2513	3.5316	-2.184	1.9462	4.1302	-1.0441	3.3275	4.3716	-0.8021	3.3097	4.1118
1979Q3	-3.6768	-0.7687	2.908	-3.8865	-1.2645	2.622	-2.771	0.9581	3.729	0.2133	3.0589	2.8456	1.2311	4.7227	3.4916
1979Q4	-3.8111	-0.6938	3.1173	-4.7005	-1.3969	3.3036	-3.5623	-0.4501	3.1122	0.5165	2.9068	2.3902	1.6858	5.1477	3.4619
1980Q1	-1.7251	1.3546	3.0797	-3.2799	-0.0763	3.2036	-2.8248	-0.486	2.3388	-0.3313	2.0022	2.3335	0.518	4.156	3.638
1980Q2	-5.9591	-1.9378	4.0213	-5.011	-1.5046	3.5064	-2.5732	1.4032	3.9764	0.0404	3.9154	3.875	1.2152	3.0903	1.8752
1980Q3	-4.788	-2.3057	2.4823	-3.3341	1.7044	5.0386	0.3383	4.0673	3.729	0.9131	4.7175	3.8044	2.4445	5.7448	3.3002
1980Q4	0.4899	2.9041	2.4141	-0.4677	1.848	2.3157	1.6641	3.6111	1.947	3.1413	4.4953	1.354	3.1409	4.7584	1.6175
1981Q1	0.1319	2.1021	1.9703	-0.0073	1.957	1.9644	2.1512	4.3128	2.1616	2.5836	4.4911	1.9075	2.9003	5.6346	2.7343
1981Q2	-0.6019	1.582	2.184	0.6548	3.1408	2.486	2.7145	3.9761	1.2617	2.6039	4.8448	2.2409	2.2425	4.0227	1.7803
1981Q3	-0.9257	0.7979	1.7236	1.3329	3.2126	1.8797	2.1347	4.5954	2.4607	2.3959	4.7485	2.3526	3.1187	4.7674	1.6487
1981Q4	-4.8095	-2.7544	2.0551	-2.1052	0.804	2.9092	1.3527	4.0385	2.6858	4.102	6.7888	2.6868	3.9482	5.3429	1.3947
1982Q1	-3.6887	-1.989	1.6996	0.949	4.0964	3.1474	4.0632	5.4539	1.3908	4.0428	5.5194	1.4767	2.9051	4.5011	1.5961
1982Q2	-1.3409	0.9474	2.2883	2.453	4.3922	1.9392	2.5481	4.611	2.063	2.1512	3.7404	1.5892	2.6394	4.166	1.5266
1982Q3	0.816	2.1872	1.3712	2.1753	3.8299	1.6546	2.2958	3.6688	1.373	2.1375	3.4908	1.3533	2.9244	4.5281	1.6037
1982Q4	0.5413	2.1827	1.6415	2.1709	3.8117	1.6408	2.1738	4.0304	1.8566	2.9658	4.8411	1.8753	2.9879	4.796	1.8081
1983Q1	3.0187	4.4131	1.3945	2.1724	3.4084	1.2361	3.14	5.0212	1.8812	3.5073	5.2235	1.7162	3.33	5.0674	1.7374
1983Q2	3.8143	5.7737	1.9594	4.0604	5.68	1.6196	3.9876	5.3464	1.3589	3.4017	5.0222	1.6205	3.9353	5.099	1.1637
1983Q3	5.6306	7.2821	1.6515	3.943	5.0106	1.0676	2.8523	4.7205	1.8682	3.8322	4.6444	0.8122	3.2898	4.6058	1.316
1983Q4	4.7143	6.5876	1.8733	3.5825	5.1769	1.5944	3.5756	4.8384	1.2627	3.544	4.8322	1.2882	3.2286	4.7329	1.5044
1984Q1	4.3978	5.5858	1.188	3.5917	4.6176	1.0259	3.5306	4.7656	1.235	3.0017	4.7536	1.752	2.4859	3.6795	1.1936
1984Q2	3.0244	4.5648	1.5405	3.0035	4.2856	1.282	2.9628	4.4741	1.5114	2.4539	4.1983	1.7444	2.1809	3.7798	1.5988
1984Q3	3.9587	4.9665	1.0078	3.1686	4.4057	1.2372	2.2937	3.8701	1.5764	1.6676	3.8563	2.1887	1.3081	3.4134	2.1053
1984Q4	1.9571	3.4374	1.4803	2.1931	3.8972	1.7042	2.8844	4.2705	1.3861	2.5162	3.353	0.8368	2.3867	3.7038	1.3171
1985Q1	3.1676	4.6433	1.4757	3.3752	4.8535	1.4783	3.353	4.0774	0.7244	2.8384	4.0315	1.1931	2.5596	3.528	0.9685
1985Q2	2.6665	3.8996	1.2331	3.5002	4.8461	1.3459	2.8612	4.3056	1.4444	2.3724	3.7911	1.4187	2.1107	3.7799	1.6691
1985Q3	2.5365	3.7612	1.2247	2.5158	4.0922	1.5764	1.7818	3.4474	1.6655	2.018	3.527	1.509	1.8823	3.0487	1.1664
1985Q4	2.0332	3.361	1.3278	2.251	3.2109	0.9599	1.7743	3.5468	1.7725	2.6882	3.3075	0.6193	1.9679	3.9636	1.9958
1986Q1	2.4635	4.6405	2.177	2.2277	3.6801	1.4524	2.3271	4.1054	1.7784	2.0973	4.1366	2.0393	0.8667	3.3642	2.4975
1986Q2	1.7777	2.9048	1.1271	2.2007	4.4761	2.2753	2.5312	4.4302	1.8991	2.3079	4.0405	1.7325	1.6179	3.7063	2.0885
1986Q3	1.7572	2.9787	1.2215	2.2978	3.7307	1.4329	1.8541	3.9126	2.0585	2.5791	3.9286	1.3495	2.1447	4.0055	1.8608
1986Q4	2.2978	3.0725	0.7747	1.4101	2.6128	1.2027	2.2711	3.0466	0.7755	2.3828	3.5658	1.183	2.48	3.7474	1.2674
1987Q1	2.2335	3.1602	0.9267	1.9512	3.7577	1.8066	2.6391	3.8867	1.2476	2.6662	3.7936	1.1274	2.5329	3.4922	0.9593
1987Q2	0.9673	2.7036	1.7363	2.1574	3.6684	1.5109	2.3503	3.4185	1.0682	2.4483	3.3842	0.9358	1.9866	3.3558	1.3692
1987Q3	2.1248	3.038	0.9132	2.7515	3.4933	0.7417	2.7725	3.5219	0.7494	2.0866	3.1374	1.0508	2.0887	3.2035	1.1148
1987Q4	1.4698	2.9542	1.4844	0.5178	2.6112	2.0934	0.8333	2.8267	1.9934	2.0806	3.4502	1.3697	1.9559	3.2151	1.2592
1988Q1	-0.5151	1.453	1.9681	0.3097	2.8018	2.492	1.3463	3.5349	2.1886	1.0283	3.2734	2.2451	2.0434	3.8562	1.8129
1988Q2	1.0267	3.0491	2.0225	1.6393	2.9761	1.3368	1.5277	3.1691	1.6414	2.0151	3.0187	1.0036	1.704	2.9162	1.2122
1988Q3	2.2772	3.0961	0.8189	2.058	3.0735	1.0155	2.1508	3.2952	1.1444	1.6281	3.5393	1.9112	1.7365	3.4495	1.7131
1988Q4	1.7079	3.0286	1.3207	3.0187	4.8415	1.8228	1.9851	3.0778	1.0928	1.8795	2.6564	0.7768	1.2841	2.5558	1.2717
1989Q1	2.2527	5.2607	3.008	1.4294	2.6715	1.2421	1.3749	2.557	1.1821	0.925	2.5033	1.5782	0.4816	2.1312	1.6496
1989Q2	1.0807	2.3761	1.2955	0.8801	2.6564	1.7763	0.8769	2.7409	1.864	0.9683	2.2463	1.278	0.3395	2.2315	1.892
1989Q3	1.169	2.3419	1.1729	1.169	2.6369	1.4679	1.0642	2.9138	1.8496	1.5436	2.9681	1.4245	2.0248	3.0987	1.074
1989Q4	0.8686	1.6455	0.7768	0.7702	2.414	1.6438	1.1039	2.6087	1.5048	1.7229	2.9958	1.2728	2.2816	3.5079	1.2263
1990Q1	1.1566	1.9328	0.7762	1.5407	2.798	1.2574	1.917	2.6818	0.7648	1.9047	2.872	0.9673	1.8934	3.0438	1.1503
1990Q2	1.534	3.0856	1.5516	1.6242	2.8171	1.1929	0.962	2.5722	1.6102	1.8979	2.6775	0.7796	1.9651	2.6364	0.6713
1990Q3	-0.2879	2.0331	2.321	0.2888	1.4998	1.211	0.0676	2.2064	2.1388	1.3163	2.3937	1.0774	1.4825	3.3769	1.8943
1990Q4	-1.9029	-0.8597	1.0432	-1.9097	-0.5758	1.3339	-0.7155	1.1614	1.8769	0.8676	2.6453	1.7777	1.602	2.916	1.314
1991Q1	-2.4272	-1.3432	1.084	-0.8692	0.972	1.8413	1.1744	2.4915	1.3171	1.8538	3.3347	1.4808	2.5132	3.2887	0.7756
1991Q2	-0.5904	0.593	1.1834	1.2923	2.8371	1.5447	2.2343	3.3932	1.1589	2.3328	3.3136	0.9807	2.2091	3.3842	1.1751
1991Q3	2.0505	3.0379	0.9874	1.9389	3.6098	1.671	2.4197	3.3916	0.9719	2.4903	3.636	1.1457	2.5563	3.2611	0.7048
1991Q4	1.0662	2.0625	0.9963	1.6451	2.6312	0.9861	2.1489	3.4812	1.3323	2.4962	3.6764	1.1802	2.5364	3.2674	0.731
1992Q1	-0.0411	1.1	1.1411	1.9863	2.7171	0.7308	2.464	3.6099	1.1459	2.5463	3.6084	1.0621	2.4479	3.7119	1.264
1992Q2	2.484	3.462	0.9779	2.7	3.5028	0.8028	2.6446	3.5015	0.8568	2.5	3.4541	0.9541	2.6	3.4951	0.8951
1992Q3	1.8406	2.5597	0.7191	2.0015	2.8629	0.8614	2.3721	3.2786	0.9065	2.5087	3.4489	0.9403	2.497	3.5519	1.0549
1992Q4	1.3358	2.4219	1.0861	2.2912	3.079	0.7878	2.3991	3.3798	0.9807	2.5711	3.6693	1.0982	2.6133	3.5963	0.983
1993Q1	2.5789	3.5	0.9211	2.6357	3.5213	0.8856	2.8867	3.6041	0.7174	2.9	3.4513	0.5513	2.74	3.4987	0.7587
1993Q2	2.0756	2.8651	0.7895	2.7624	3.8211	1.0587	3.0051	3.5028	0.4977	2.7	3.4	0.7	2.4832	3.3	0.8168
1993Q3	2.5177	3.5	0.9823	2.3247	3.5	1.1753	2.3545	3.129	0.7745	2.4046	3.0702	0.6656	2.4	3.1631	0.7631
1993Q4	3.2702	3.9498	0.6796	2.3364	3.0989	0.7625	2.4	3.018	0.6181	2.5851	3.1001	0.515	2.4984	3.2204	0.7221
1994Q1	3	3.5	0.4999	2.5348	3.4958	0.961	2.5588	3.2362	0.6775	2.5149	3.0814	0.5665	2.1642	2.7943	0.6301
1994Q2	3.3889	4.3514	0.9626	2.7	3.5261	0.8261	2.4999	3.1346	0.6346	2.2947	2.728	0.4334	2.2225	3	0.7775
1994Q3	2.1	2.9554	0.8555	2.3	3	0.7	1.9993	2.8614	0.8621	2.2	2.9002	0.7002	2.2	2.7618	0.5618
1994Q4	2.8284	3.7538	0.9253	2.5052	3.1235	0.6183	2.3328	3.0692	0.7364	2.2095	2.9133	0.7038	2.3451	2.9161	0.571
1995Q1	2.6875	3.3735	0.6859	2.3368	3.0377	0.7008	2.1	2.6435	0.5435	1.9998	2.4372	0.4375	1.7958	2.6	0.8042
1995Q2	1.3109	2.0886	0.7777	1.8517	2.6654	0.8138	2.281	3.1096	0.8286	2.2	3.1643	0.9643	2.0856	2.8581	0.7725
1995Q3	1.7	2.5	0.8001	2.499	3.487	0.988	2.4032	3.219	0.8158	2.3953	2.9664	0.571	2.2408	2.9351	0.6942
1995Q4	2	2.771	0.771	2.2589	3.1	0.8411	2.3	2.9	0.5999	2.2218	2.8	0.5782	1.9875	2.9	0.9125
1996Q1	0.9586	1.79	0.8314	1.7	2.6814	0.9814	1.98	2.6	0.62	2	2.8	0.8	1.9157	2.827	0.9113
1996Q2	2.5446	3.1492	0.6047	1.9112	2.6944	0.7832	1.6	2.4	0.8	1.8022	2.5004	0.6983	1.6	2.4093	0.8093
1996Q3	2.3383	2.9901	0.6518	2.1	2.6205	0.5205	1.7912	2.5303	0.739	1.5449	2.3	0.7551	1.5447	2.377	0.8323
1996Q4	1.7605	2.6995	0.939	2	2.6692	0.6692	1.7516	2.4151	0.6634	1.772	2.5	0.728	1.8759	2.5	0.6241
1997Q1	1.8388	2.8	0.9612	1.9428	2.8	0.8572	1.8	2.5	0.7	1.9	2.6314	0.7314	1.8554	2.4	0.5446
1997Q2	2.0095	2.986	0.9765	2.2112	2.8632	0.652	2.0184	2.7787	0.7603	1.7288	2.5056	0.7768	1.6	2.2839	0.6838
1997Q3	2.4	2.9	0.5	2.2006	2.9809	0.7803	1.9728	2.8	0.8272	2	2.6675	0.6675	1.8797	2.647	0.7673
1997Q4	2.4538	3.1	0.6462	1.9922	2.6188	0.6266	2.2056	2.6	0.3944	1.797	3	1.203	1.7769	2.5	0.7231
1998Q1	2	2.8	0.8	1.7	2.7	1	1.7	2.5	0.8	1.7	2.7937	1.0937	2	2.6726	0.6726
1998Q2	2.2	2.9987	0.7987	1.9349	2.7794	0.8445	1.8789	2.8487	0.9699	2	2.85	0.85	2.0639	2.7104	0.6465
1998Q3	1.7467	2.5552	0.8084	2.3	3.3353	1.0353	1.7926	2.6	0.8074	1.8532	2.6612	0.808	2.2472	3.0187	0.7715
1998Q4	2.0367	2.672	0.6354	1.3	2.3115	1.0115	1.0931	2.158	1.0649	1.5184	2.4813	0.9628	1.9824	2.8256	0.8431
1999Q1	2.6332	3.4	0.7668	2.1852	2.9851	0.7999	1.9	2.7608	0.8608	2.0009	3.1	1.099	0.888	2.6041	1.716
1999Q2	2.6	3.7	1.1	2.1918	3.358	1.1662	2.3657	3.7	1.3343	0.8761	2.8938	2.0177	2.0258	3	0.9742
1999Q3	2.9958	3.5	0.5042	2.7	3.6	0.9	1.0315	2.6512	1.6197	2.2	2.9848	0.7848	2.4	2.9605	0.5605
1999Q4	3.3235	4.2217	0.8982	1.2048	2.954	1.7492	2.4974	3.8722	1.3748	2.6228	3.7579	1.1352	2.5254	3.5239	0.9985
2000Q1	2.1283	3.8474	1.7191	2.8	3.531	0.731	2.6298	3.5677	0.9379	2.5728	3.3638	0.791	2.3913	3.3642	0.9729
2000Q2	3.7293	4.5489	0.8196	3.0117	3.9639	0.9522	2.5719	3.824	1.2521	2.3	3.7401	1.4401	2.4647	3.5109	1.0462
2000Q3	2.9629	3.6498	0.6869	2.8988	3.8622	0.9634	2.4	3.5043	1.1044	2.5385	3.5	0.9615	2.7	3.6364	0.9364
2000Q4	2.6001	3.7	1.1	2.9528	3.5434	0.5907	2.7852	3.5996	0.8143	2.957	3.7915	0.8345	2.9791	3.9607	0.9816
2001Q1	0.132	1.7343	1.6023	1.5	2.666	1.166	2.6	3.7265	1.1265	2.9983	3.8871	0.8888	3.0946	4.1042	1.0096
2001Q2	0.7606	1.4999	0.7393	1.618	2.6055	0.9875	2.2036	3.4345	1.231	2.7611	3.7	0.9388	3	3.8	0.8
2001Q3	0.996	1.9	0.904	1.9382	2.9831	1.0449	2.4957	3.2	0.7043	2.5212	3.4658	0.9446	2.6581	3.7	1.0419
2001Q4	-2.5635	-1.3601	1.2034	-0.7	1.471	2.1709	1.8988	2.7638	0.865	3.0658	4.05	0.9842	3.0018	4.4266	1.4248
2002Q1	0.5	2.3	1.8	1.8229	3.5292	1.7063	2.6974	4.0252	1.3278	2.8	4.22	1.42	2.7	3.7	1
2002Q2	2.0146	3.2837	1.2691	2.5021	3.9399	1.4378	2.4993	3.8899	1.3906	3.1	3.9805	0.8805	3.1212	3.8756	0.7543
2002Q3	2	3.1381	1.1381	2.299	3.2601	0.9612	2.8974	3.8	0.9026	2.9974	3.7186	0.7213	3.2663	3.9962	0.7299
2002Q4	1.0011	1.7996	0.7985	2.0328	3.0212	0.9885	2.7	3.7661	1.0661	2.9353	3.9547	1.0194	3.3	4.2952	0.9951
2003Q1	1.8197	2.6827	0.863	2.3113	3.5002	1.1889	2.7509	4.0282	1.2773	3	4.1316	1.1316	3.2703	4.0047	0.7343
2003Q2	1.5	2.2924	0.7924	2.7	4.0412	1.3412	2.6754	3.9663	1.2909	3.1	4.2775	1.1775	3.0596	4	0.9404
2003Q3	3.3297	4.1599	0.8302	3.2056	4.2395	1.034	3.5	4.1161	0.6161	3.4	4.1	0.7	3.2513	4.3545	1.1032
2003Q4	3.5284	4.3901	0.8617	3.5	4.67	1.17	3.5	4.3319	0.8319	3.6	4.4181	0.8181	3.1857	4.1451	0.9594
2004Q1	3.9075	4.809	0.9015	3.8779	4.559	0.6811	3.7128	4.2159	0.5031	3.7757	4.3499	0.5743	3.1413	4	0.8587
2004Q2	4.072	4.907	0.835	3.7719	4.48	0.7081	3.6387	4.3008	0.6621	3.3076	4.1	0.7924	3.121	4.1	0.979
2004Q3	3.2365	3.6283	0.3919	3.3229	4.3638	1.0408	3.2912	4.0998	0.8086	3.1263	3.8	0.6736	3.19	3.7431	0.5531
2004Q4	3.4811	4.0137	0.5326	3	3.6142	0.6142	2.9381	3.7253	0.7872	3.1132	4	0.8868	3.1618	3.9337	0.7719
2005Q1	3.2944	4.1184	0.824	3.3903	4.0578	0.6675	3.3152	3.691	0.3758	3.1678	3.9548	0.787	2.9426	3.8023	0.8598
2005Q2	2.7799	3.1607	0.3809	3.3	3.6846	0.3846	3.0122	3.8189	0.8067	2.8771	3.7127	0.8356	3.0083	3.7012	0.6929
2005Q3	3.7307	4.6218	0.8912	3.1362	3.7388	0.6025	2.954	3.5782	0.6242	3.0085	3.5573	0.5488	2.8	3.5462	0.7462
2005Q4	2.8224	3.6	0.7775	3.0127	4	0.9873	3	3.6	0.6	3	3.5027	0.5028	2.7386	3.5685	0.8299
2006Q1	3.7733	4.5847	0.8115	3.0009	4	0.999	2.7725	3.5	0.7275	2.516	3.4112	0.8952	2.5646	3.341	0.7764
2006Q2	3	3.6	0.6	2.8	3.3968	0.5968	2.5929	3.1709	0.5781	2.535	3.1443	0.6093	2.6	3.2422	0.6422
2006Q3	2.289	3.0594	0.7705	2.3	3.0806	0.7806	2.4	3.1	0.7	2.3716	3.062	0.6904	2.4906	3.2402	0.7496
2006Q4	2	2.9428	0.9428	2.3419	3.0558	0.7138	2.4	3.1661	0.7661	2.5	3.1222	0.6222	2.5243	3.1676	0.6433
2007Q1	2.3663	2.7888	0.4225	2.3544	2.9475	0.5931	2.6	3.2954	0.6954	2.8169	3.3276	0.5107	2.842	3.4613	0.6193
2007Q2	2.1611	2.6161	0.4549	2.1166	2.8882	0.7716	2.5426	3.1302	0.5876	2.6365	3.2327	0.5962	2.7985	3.2	0.4015
2007Q3	2.3	2.8	0.5	2.3	2.9	0.6	2.2766	3.0197	0.743	2.4852	3.1	0.6148	2.4784	3.1	0.6216
2007Q4	1.3982	1.964	0.5658	1.6195	2.4	0.7805	2.0106	2.7317	0.7211	2.3937	3	0.6063	2.5184	3.1	0.5816
2008Q1	0.1498	1.1711	1.0213	0.7802	2.1	1.3198	1.8831	3.1548	1.2717	2.1516	3.0806	0.929	2.3493	3.1276	0.7784
2008Q2	-0.4073	0.9234	1.3307	1.4178	2.6255	1.2077	0.9	2.118	1.218	1.392	2.7577	1.3657	2.2053	2.9	0.6947
2008Q3	0.6041	2	1.3959	-0.205	1.3663	1.5713	0.8474	2	1.1526	1.5	2.7	1.2	1.9451	2.8	0.8549
2008Q4	-3.6803	-2	1.6803	-2.0158	-0.4	1.6158	-0.2713	1.456	1.7274	0.9	2.2519	1.3519	1.6288	3	1.3712
2009Q1	-5.7911	-4.4511	1.34	-2.5	-0.8	1.7	-0.0753	1.7582	1.8335	1.2972	2.8	1.5028	2.0071	3.0098	1.0027
2009Q2	-2.1307	-0.5	1.6307	-0.458	1.5643	2.0223	1	2.5	1.5	1.5451	2.8967	1.3517	2.2527	3.3	1.0473
2009Q3	1.5131	3.0151	1.502	1.6402	3.0021	1.3619	1.9814	3.0059	1.0245	2.0717	3.2295	1.1578	2.1556	3.4984	1.3428
2009Q4	2.0222	3.3	1.2778	2	3.0007	1.0007	2.1355	3.3	1.1645	2.1979	3.4986	1.3007	2.2978	3.4768	1.1789
2010Q1	2.2322	3.0456	0.8134	2.2783	3.4269	1.1485	2.3886	3.5	1.1114	2.3763	3.4968	1.1205	2.429	3.3254	0.8964
2010Q2	2.8257	3.8347	1.009	2.3697	3.6013	1.2316	2.6516	3.4634	0.8118	2.476	3.3715	0.8955	2.5155	3.4679	0.9524
2010Q3	1.6009	3.0073	1.4064	2.0668	3.1793	1.1126	2.1047	3.2476	1.1429	2.5	3.5128	1.0128	2.6916	3.4948	0.8033
2010Q4	1.69	2.5	0.81	2.0494	2.8439	0.7945	2.33	3.1452	0.8153	2.5704	3.4805	0.9101	2.7	3.7	1
2011Q1	3.2502	3.96	0.7097	3.0339	3.8012	0.7673	2.9735	3.9335	0.9599	3.0219	3.9259	0.9039	2.701	3.584	0.883
2011Q2	2.7705	3.6239	0.8534	2.9112	3.7116	0.8004	2.9836	3.753	0.7694	2.5698	3.5	0.9302	2.6501	3.5675	0.9174
2011Q3	1.8388	2.6022	0.7634	2.0268	2.7242	0.6974	1.908	2.7	0.792	2.4211	2.9	0.4789	2.2813	3.2551	0.9738
2011Q4	2.1332	2.978	0.8447	1.8513	2.9	1.0487	2.0163	2.8612	0.8448	2.2291	3.0563	0.8272	2.2299	3.1033	0.8734
2012Q1	1.8484	2.534	0.6855	2.0666	2.708	0.6415	2.3288	2.9	0.5712	2.4486	3.0225	0.5738	2.0782	3.0901	1.0119
2012Q2	2.0147	2.7	0.6853	2.3	2.801	0.501	2.3897	3.0951	0.7054	2.0628	2.8867	0.8239	2.4211	3.0385	0.6174
2012Q3	1.3223	2.2816	0.9592	1.8	2.4	0.6	1.6	2.367	0.767	2.0043	2.7	0.6957	2.1175	3.0942	0.9767
2012Q4	1.3665	2	0.6335	1.3144	2.1821	0.8677	1.8083	2.4848	0.6765	2.316	3.0347	0.7187	2.4632	3.3086	0.8454
2013Q1	1.7195	2.7851	1.0656	1.8902	2.4748	0.5846	2.2128	2.9705	0.7577	2.3915	3.0633	0.6718	2.5	3.1417	0.6417
2013Q2	1.4373	2.15	0.7127	1.997	2.674	0.677	2.3246	3.111	0.7863	2.4151	3.2156	0.8005	2.5389	3.2	0.6611
2013Q3	1.9747	2.59	0.6153	2.1994	2.9243	0.7249	2.244	3	0.756	2.4472	3.0346	0.5874	2.6057	3.1878	0.5822
2013Q4	1.5	2.2	0.7	2.287	2.9571	0.6701	2.4	3	0.6	2.537	3.1216	0.5846	2.6399	3.161	0.5211
2014Q1	1.7247	2.4768	0.752	2.2178	3.1547	0.9369	2.4899	3.2308	0.7409	2.5	3.3707	0.8707	2.8155	3.5238	0.7083
2014Q2	2.9793	3.6716	0.6923	2.5	3.406	0.906	2.583	3.5096	0.9266	2.6	3.3381	0.7381	2.5781	3.3018	0.7237
2014Q3	2.5281	3.3889	0.8608	2.6222	3.4384	0.8162	2.6289	3.2194	0.5906	2.6	3.3501	0.7501	2.6916	3.2861	0.5945
2014Q4	2.4085	3.1779	0.7694	2.4596	3.1033	0.6437	2.55	3.1007	0.5507	2.6573	3.2234	0.566	2.7077	3.2301	0.5224
2015Q1	2.385	3.0671	0.6821	2.5205	3.0691	0.5486	2.6	3.2459	0.6459	2.5203	3.124	0.6037	2.5188	3.2	0.6812
2015Q2	1.7839	3.0394	1.2555	2.8	3.3175	0.5175	2.6111	3.1262	0.5151	2.263	2.9531	0.6901	2.5	3.1	0.6
2015Q3	2.3486	3.1304	0.7818	2.5259	3.0959	0.57	2.5175	2.9706	0.4531	2.5	3.09	0.59	2.5457	3.0497	0.5041
2015Q4	2.3079	3.0364	0.7286	2.25	2.8298	0.5798	2.3601	3	0.6399	2.3799	3.0621	0.6822	2.3408	2.9506	0.6098
2016Q1	1.5661	2.3192	0.7531	2.0281	2.8893	0.8612	2.25	2.8628	0.6128	2.2904	2.8135	0.5231	2.1471	2.4667	0.3196
2016Q2	1.7282	2.499	0.7708	2.0369	2.5826	0.5457	2.2515	2.6783	0.4268	1.9966	2.4606	0.464	2.0834	2.6079	0.5245
2016Q3	2.3	3.1304	0.8304	2.1278	2.5	0.3722	1.9836	2.4172	0.4336	2.0887	2.471	0.3823	2.015	2.5625	0.5475
2016Q4	1.9004	2.45	0.5496	1.9991	2.45	0.4509	2.0595	2.5	0.4405	2.0075	2.4407	0.4332	2	2.5	0.5
2017Q1	2.0176	2.6239	0.6063	1.9895	2.5904	0.601	2.0813	2.758	0.6766	2.0655	2.6143	0.5487	2.0213	2.8	0.7787
2017Q2	2.8913	3.3258	0.4345	2.296	2.8506	0.5546	2.1472	2.7522	0.605	2.1758	2.6894	0.5136	2.1	3.1	1
2017Q3	2.3716	2.9289	0.5573	2.0454	2.6	0.5546	1.9425	2.6296	0.6871	2.0011	2.8029	0.8018	2	2.6803	0.6803
2017Q4	2.4118	2.8121	0.4003	2.0434	2.7217	0.6783	2.2	2.682	0.482	2.0344	2.5936	0.5591	1.9704	2.5725	0.6021
2018Q1	2.6195	3.2497	0.6302	2.5224	3.2274	0.705	2.2439	3.0966	0.8528	2.27	2.7981	0.5281	2.2691	2.7629	0.4939
2018Q2	2.8422	3.4401	0.5979	2.632	3.1637	0.5317	2.4266	3.059	0.6324	2.2937	2.8105	0.5168	2.309	2.6637	0.3547
2018Q3	2.8179	3.2142	0.3963	2.4556	3.158	0.7023	2.1968	2.8799	0.6831	2.1583	2.8571	0.6988	2	2.7358	0.7358
2018Q4	2.4	2.9999	0.5999	2.1736	2.8	0.6264	2.2742	2.9175	0.6433	2.0063	2.6	0.5937	1.8122	2.4742	0.662
2019Q1	0.999	1.9786	0.9796	2.2455	2.7483	0.5028	1.9418	2.5591	0.6173	1.9767	2.5	0.5233	1.7735	2.3434	0.5699
2019Q2	1.2238	2.3045	1.0806	1.8105	2.4	0.5895	1.808	2.4677	0.6597	1.7643	2.3247	0.5604	1.6461	2.4	0.7539
2019Q3	1.6557	2.083	0.4273	1.679	2.2185	0.5395	1.6427	2.3	0.6573	1.6774	2.2595	0.5822	1.5	2.25	0.75
2019Q4	1.4667	2.0094	0.5427	1.6096	2.191	0.5814	1.6167	2.25	0.6333	1.4029	2.2445	0.8415	1.5442	2.2	0.6558
2020Q1	1.3123	2.0382	0.7258	1.6912	2.4832	0.792	1.6893	2.3477	0.6584	1.828	2.4066	0.5786	1.8287	2.3008	0.4722
2020Q2	-36.0584	-26.5933	9.4651	0.9752	20.305	19.3298	4.1122	9.478	5.3658	2.5583	6.5241	3.9658	2.5495	6.0119	3.4624
2020Q3	15.5326	21.8283	6.2957	3.3411	8.7583	5.4172	2.9335	5.8919	2.9584	2.78	4.2666	1.4866	2.7	4.0442	1.3442
2020Q4	3.0751	5.4719	2.3969	2.6443	4.2947	1.6504	2.5914	4.2499	1.6586	2.6	3.9728	1.3728	2.4066	3.7882	1.3817
2021Q1	2.0879	3.9031	1.8151	4	7.0316	3.0316	4.4106	6.8702	2.4597	3.5	5.25	1.75	3.0144	4.0604	1.046
2021Q2	7.083	9.1068	2.0237	5.2477	7.8053	2.5575	4.0125	6.1	2.0875	3	4.6054	1.6054	2.6639	4.0348	1.3709
2021Q3	5.4152	8.2833	2.8681	4.4654	6.2797	1.8142	3.2811	4.6995	1.4185	2.7976	4.1364	1.3388	2.494	3.5967	1.1028
2021Q4	3.6088	5.4717	1.8628	3.3	5.1	1.8	3.2	4.5298	1.3298	2.9254	4	1.0746	2.6	3.3237	0.7237

## Sheet: RCONSUM
Measures of Cross-Sectional Dispersion for Quarterly Forecasts for REAL TOTAL CONSUMPTION EXPENDITURE (RCONSUM)
Units: Annualized Percentage Points
Dispersion Measure D2 = 75th Percentile Minus 25th Percentile of the Forecasts for Q/Q Growth
P25 = 25th Percentile of the Forecasts for Q/Q Growth
P75 = 75th Percentile of the Forecasts for Q/Q Growth
At Each Survey Date T, the Quarterly Horizons Are T, T+1, T+2, T+3, and T+4
Survey_Date(T)	RCONSUM_P25_D2(T)	RCONSUM_P75_D2(T)	RCONSUM_D2(T)	RCONSUM_P25_D2(T+1)	RCONSUM_P75_D2(T+1)	RCONSUM_D2(T+1)	RCONSUM_P25_D2(T+2)	RCONSUM_P75_D2(T+2)	RCONSUM_D2(T+2)	RCONSUM_P25_D2(T+3)	RCONSUM_P75_D2(T+3)	RCONSUM_D2(T+3)	RCONSUM_P25_D2(T+4)	RCONSUM_P75_D2(T+4)	RCONSUM_D2(T+4)
1968Q4	#N/A	#N/A	#N/A	#N/A	#N/A	#N/A	#N/A	#N/A	#N/A	#N/A	#N/A	#N/A	#N/A	#N/A	#N/A
1969Q1	#N/A	#N/A	#N/A	#N/A	#N/A	#N/A	#N/A	#N/A	#N/A	#N/A	#N/A	#N/A	#N/A	#N/A	#N/A
1969Q2	#N/A	#N/A	#N/A	#N/A	#N/A	#N/A	#N/A	#N/A	#N/A	#N/A	#N/A	#N/A	#N/A	#N/A	#N/A
1969Q3	#N/A	#N/A	#N/A	#N/A	#N/A	#N/A	#N/A	#N/A	#N/A	#N/A	#N/A	#N/A	#N/A	#N/A	#N/A
1969Q4	#N/A	#N/A	#N/A	#N/A	#N/A	#N/A	#N/A	#N/A	#N/A	#N/A	#N/A	#N/A	#N/A	#N/A	#N/A
1970Q1	#N/A	#N/A	#N/A	#N/A	#N/A	#N/A	#N/A	#N/A	#N/A	#N/A	#N/A	#N/A	#N/A	#N/A	#N/A
1970Q2	#N/A	#N/A	#N/A	#N/A	#N/A	#N/A	#N/A	#N/A	#N/A	#N/A	#N/A	#N/A	#N/A	#N/A	#N/A
1970Q3	#N/A	#N/A	#N/A	#N/A	#N/A	#N/A	#N/A	#N/A	#N/A	#N/A	#N/A	#N/A	#N/A	#N/A	#N/A
1970Q4	#N/A	#N/A	#N/A	#N/A	#N/A	#N/A	#N/A	#N/A	#N/A	#N/A	#N/A	#N/A	#N/A	#N/A	#N/A
1971Q1	#N/A	#N/A	#N/A	#N/A	#N/A	#N/A	#N/A	#N/A	#N/A	#N/A	#N/A	#N/A	#N/A	#N/A	#N/A
1971Q2	#N/A	#N/A	#N/A	#N/A	#N/A	#N/A	#N/A	#N/A	#N/A	#N/A	#N/A	#N/A	#N/A	#N/A	#N/A
1971Q3	#N/A	#N/A	#N/A	#N/A	#N/A	#N/A	#N/A	#N/A	#N/A	#N/A	#N/A	#N/A	#N/A	#N/A	#N/A
1971Q4	#N/A	#N/A	#N/A	#N/A	#N/A	#N/A	#N/A	#N/A	#N/A	#N/A	#N/A	#N/A	#N/A	#N/A	#N/A
1972Q1	#N/A	#N/A	#N/A	#N/A	#N/A	#N/A	#N/A	#N/A	#N/A	#N/A	#N/A	#N/A	#N/A	#N/A	#N/A
1972Q2	#N/A	#N/A	#N/A	#N/A	#N/A	#N/A	#N/A	#N/A	#N/A	#N/A	#N/A	#N/A	#N/A	#N/A	#N/A
1972Q3	#N/A	#N/A	#N/A	#N/A	#N/A	#N/A	#N/A	#N/A	#N/A	#N/A	#N/A	#N/A	#N/A	#N/A	#N/A
1972Q4	#N/A	#N/A	#N/A	#N/A	#N/A	#N/A	#N/A	#N/A	#N/A	#N/A	#N/A	#N/A	#N/A	#N/A	#N/A
1973Q1	#N/A	#N/A	#N/A	#N/A	#N/A	#N/A	#N/A	#N/A	#N/A	#N/A	#N/A	#N/A	#N/A	#N/A	#N/A
1973Q2	#N/A	#N/A	#N/A	#N/A	#N/A	#N/A	#N/A	#N/A	#N/A	#N/A	#N/A	#N/A	#N/A	#N/A	#N/A
1973Q3	#N/A	#N/A	#N/A	#N/A	#N/A	#N/A	#N/A	#N/A	#N/A	#N/A	#N/A	#N/A	#N/A	#N/A	#N/A
1973Q4	#N/A	#N/A	#N/A	#N/A	#N/A	#N/A	#N/A	#N/A	#N/A	#N/A	#N/A	#N/A	#N/A	#N/A	#N/A
1974Q1	#N/A	#N/A	#N/A	#N/A	#N/A	#N/A	#N/A	#N/A	#N/A	#N/A	#N/A	#N/A	#N/A	#N/A	#N/A
1974Q2	#N/A	#N/A	#N/A	#N/A	#N/A	#N/A	#N/A	#N/A	#N/A	#N/A	#N/A	#N/A	#N/A	#N/A	#N/A
1974Q3	#N/A	#N/A	#N/A	#N/A	#N/A	#N/A	#N/A	#N/A	#N/A	#N/A	#N/A	#N/A	#N/A	#N/A	#N/A
1974Q4	#N/A	#N/A	#N/A	#N/A	#N/A	#N/A	#N/A	#N/A	#N/A	#N/A	#N/A	#N/A	#N/A	#N/A	#N/A
1975Q1	#N/A	#N/A	#N/A	#N/A	#N/A	#N/A	#N/A	#N/A	#N/A	#N/A	#N/A	#N/A	#N/A	#N/A	#N/A
1975Q2	#N/A	#N/A	#N/A	#N/A	#N/A	#N/A	#N/A	#N/A	#N/A	#N/A	#N/A	#N/A	#N/A	#N/A	#N/A
1975Q3	#N/A	#N/A	#N/A	#N/A	#N/A	#N/A	#N/A	#N/A	#N/A	#N/A	#N/A	#N/A	#N/A	#N/A	#N/A
1975Q4	#N/A	#N/A	#N/A	#N/A	#N/A	#N/A	#N/A	#N/A	#N/A	#N/A	#N/A	#N/A	#N/A	#N/A	#N/A
1976Q1	#N/A	#N/A	#N/A	#N/A	#N/A	#N/A	#N/A	#N/A	#N/A	#N/A	#N/A	#N/A	#N/A	#N/A	#N/A
1976Q2	#N/A	#N/A	#N/A	#N/A	#N/A	#N/A	#N/A	#N/A	#N/A	#N/A	#N/A	#N/A	#N/A	#N/A	#N/A
1976Q3	#N/A	#N/A	#N/A	#N/A	#N/A	#N/A	#N/A	#N/A	#N/A	#N/A	#N/A	#N/A	#N/A	#N/A	#N/A
1976Q4	#N/A	#N/A	#N/A	#N/A	#N/A	#N/A	#N/A	#N/A	#N/A	#N/A	#N/A	#N/A	#N/A	#N/A	#N/A
1977Q1	#N/A	#N/A	#N/A	#N/A	#N/A	#N/A	#N/A	#N/A	#N/A	#N/A	#N/A	#N/A	#N/A	#N/A	#N/A
1977Q2	#N/A	#N/A	#N/A	#N/A	#N/A	#N/A	#N/A	#N/A	#N/A	#N/A	#N/A	#N/A	#N/A	#N/A	#N/A
1977Q3	#N/A	#N/A	#N/A	#N/A	#N/A	#N/A	#N/A	#N/A	#N/A	#N/A	#N/A	#N/A	#N/A	#N/A	#N/A
1977Q4	#N/A	#N/A	#N/A	#N/A	#N/A	#N/A	#N/A	#N/A	#N/A	#N/A	#N/A	#N/A	#N/A	#N/A	#N/A
1978Q1	#N/A	#N/A	#N/A	#N/A	#N/A	#N/A	#N/A	#N/A	#N/A	#N/A	#N/A	#N/A	#N/A	#N/A	#N/A
1978Q2	#N/A	#N/A	#N/A	#N/A	#N/A	#N/A	#N/A	#N/A	#N/A	#N/A	#N/A	#N/A	#N/A	#N/A	#N/A
1978Q3	#N/A	#N/A	#N/A	#N/A	#N/A	#N/A	#N/A	#N/A	#N/A	#N/A	#N/A	#N/A	#N/A	#N/A	#N/A
1978Q4	#N/A	#N/A	#N/A	#N/A	#N/A	#N/A	#N/A	#N/A	#N/A	#N/A	#N/A	#N/A	#N/A	#N/A	#N/A
1979Q1	#N/A	#N/A	#N/A	#N/A	#N/A	#N/A	#N/A	#N/A	#N/A	#N/A	#N/A	#N/A	#N/A	#N/A	#N/A
1979Q2	#N/A	#N/A	#N/A	#N/A	#N/A	#N/A	#N/A	#N/A	#N/A	#N/A	#N/A	#N/A	#N/A	#N/A	#N/A
1979Q3	#N/A	#N/A	#N/A	#N/A	#N/A	#N/A	#N/A	#N/A	#N/A	#N/A	#N/A	#N/A	#N/A	#N/A	#N/A
1979Q4	#N/A	#N/A	#N/A	#N/A	#N/A	#N/A	#N/A	#N/A	#N/A	#N/A	#N/A	#N/A	#N/A	#N/A	#N/A
1980Q1	#N/A	#N/A	#N/A	#N/A	#N/A	#N/A	#N/A	#N/A	#N/A	#N/A	#N/A	#N/A	#N/A	#N/A	#N/A
1980Q2	#N/A	#N/A	#N/A	#N/A	#N/A	#N/A	#N/A	#N/A	#N/A	#N/A	#N/A	#N/A	#N/A	#N/A	#N/A
1980Q3	#N/A	#N/A	#N/A	#N/A	#N/A	#N/A	#N/A	#N/A	#N/A	#N/A	#N/A	#N/A	#N/A	#N/A	#N/A
1980Q4	#N/A	#N/A	#N/A	#N/A	#N/A	#N/A	#N/A	#N/A	#N/A	#N/A	#N/A	#N/A	#N/A	#N/A	#N/A
1981Q1	#N/A	#N/A	#N/A	#N/A	#N/A	#N/A	#N/A	#N/A	#N/A	#N/A	#N/A	#N/A	#N/A	#N/A	#N/A
1981Q2	#N/A	#N/A	#N/A	#N/A	#N/A	#N/A	#N/A	#N/A	#N/A	#N/A	#N/A	#N/A	#N/A	#N/A	#N/A
1981Q3	2.1085	4.2502	2.1417	2.0889	4.2526	2.1637	2.4947	3.9584	1.4637	2.6784	4.1402	1.4619	2.4464	4.7591	2.3127
1981Q4	-2.0565	2.0887	4.1452	0.4126	3.34	2.9274	1.2429	3.7712	2.5283	4.1445	5.9749	1.8304	2.8939	5.4126	2.5188
1982Q1	0.8386	2.9581	2.1195	1.2559	2.9456	1.6897	4.1661	4.6333	0.4671	2.9241	5.0147	2.0906	1.4169	3.883	2.4661
1982Q2	-0.4143	1.6649	2.0792	2.915	4.6187	1.7037	2.4741	4.9629	2.4888	2.429	4.1274	1.6984	2.046	3.7052	1.6593
1982Q3	1.6842	4.0388	2.3546	2.9518	5.0463	2.0945	1.6529	3.3575	1.7047	2.0607	3.7476	1.6869	2.879	4.1317	1.2527
1982Q4	2.1041	2.9549	0.8509	1.6701	3.5743	1.9042	2.0736	3.9665	1.8929	2.8849	4.1105	1.2256	2.8835	4.5052	1.6218
1983Q1	1.6649	3.347	1.6821	2.4844	3.333	0.8487	2.8909	4.1618	1.2709	2.8643	4.1189	1.2547	2.429	3.9796	1.5506
1983Q2	2.9119	4.1792	1.2672	3.3055	4.9783	1.6728	3.2584	4.5284	1.27	3.2452	4.4777	1.2325	3.1934	4.0196	0.8262
1983Q3	3.6123	5.2488	1.6365	3.9599	5.1808	1.2209	1.5655	4.3493	2.7838	2.33	3.9058	1.5758	2.3098	4.2363	1.9265
1983Q4	4.3884	5.6099	1.2215	3.1432	4.3322	1.189	1.937	3.8982	1.9612	2.7012	3.8793	1.178	2.6831	4.216	1.5329
1984Q1	3.3356	5.5433	2.2076	3.0945	4.2858	1.1913	3.0664	3.8494	0.783	2.6627	3.8127	1.15	2.6376	3.7839	1.1462
1984Q2	3.0826	4.6504	1.5678	2.6754	3.831	1.1555	2.2726	3.4266	1.154	2.6277	3.7732	1.1454	2.2346	3.4332	1.1986
1984Q3	4.2039	5.3783	1.1743	3.3943	4.5447	1.1504	2.6033	3.7696	1.1663	2.2038	3.6526	1.4488	1.839	3.307	1.468
1984Q4	3.4217	5.1652	1.7435	3.0144	4.1582	1.1438	2.9696	3.7379	0.7683	2.5817	3.3192	0.7375	2.1937	3.304	1.1103
1985Q1	4.5361	5.6939	1.1577	3.3564	4.4769	1.1206	2.941	3.6863	0.7453	2.9142	3.307	0.3928	2.4811	3.265	0.784
1985Q2	2.7835	4.1059	1.3223	2.9478	3.6982	0.7504	2.7231	3.4968	0.7737	2.5373	3.265	0.7278	2.5122	3.2591	0.7469
1985Q3	1.4585	3.1198	1.6613	1.9985	3.6278	1.6292	1.8091	3.6195	1.8105	1.7905	3.2503	1.4598	1.7738	2.8292	1.0554
1985Q4	-0.7152	1.2604	1.9756	1.261	3.0898	1.8288	1.6202	2.6965	1.0763	1.7881	2.8698	1.0817	1.4134	2.8508	1.4374
1986Q1	2.4252	4.3633	1.9381	2.0583	3.7845	1.7263	2.0425	3.0754	1.0329	1.86	2.8904	1.0303	0.8428	2.6806	1.8377
1986Q2	2.5722	4.4917	1.9195	2.0321	3.5902	1.558	1.6877	3.2018	1.514	1.8522	3.3752	1.523	1.6736	3.4873	1.8137
1986Q3	2.5145	3.278	0.7635	1.4087	3.504	2.0953	1.4845	3.821	2.3366	1.1538	3.2105	2.0567	1.7138	3.1877	1.4739
1986Q4	-2.9065	2.3054	5.2119	1.6447	2.8057	1.161	1.6096	3.2892	1.6796	1.9512	3.4192	1.468	2.2819	3.0711	0.7892
1987Q1	-0.1623	1.9778	2.1401	2.1434	2.8812	0.7379	2.2901	2.8659	0.5757	2.2791	2.8453	0.5661	2.2562	3.2126	0.9564
1987Q2	2.1456	3.6511	1.5055	1.9631	3.1177	1.1546	1.636	2.935	1.299	2.4188	3.0798	0.6611	1.7645	2.5784	0.8139
1987Q3	3.2531	4.4102	1.1571	1.6006	3.2217	1.621	1.9138	3.0343	1.1205	1.2593	2.7031	1.4438	1.1109	2.6849	1.5741
1987Q4	-1.4226	2.082	3.5046	0.6374	2.2471	1.6097	0.796	2.3975	1.6015	1.4334	2.7042	1.2708	1.2718	2.5028	1.231
1988Q1	1.2877	3.4067	2.119	0.9577	2.2589	1.3012	1.1153	2.9973	1.882	0.3172	2.5117	2.1944	1.417	2.8112	1.3942
1988Q2	1.5917	2.8649	1.2732	1.6623	2.6951	1.0328	1.2598	2.4422	1.1824	1.7242	2.6634	0.9392	1.4271	2.567	1.1398
1988Q3	1.7204	3.1444	1.424	1.5522	2.1789	0.6267	0.7715	2.3232	1.5518	1.5378	2.4892	0.9513	1.0697	2.4436	1.3739
1988Q4	1.7024	2.6401	0.9377	2.1588	2.7851	0.6264	1.6874	2.6017	0.9143	1.2251	2.4408	1.2157	1.0588	2.2653	1.2066
1989Q1	1.226	2.9302	1.7042	1.679	2.5968	0.9177	1.3587	2.4343	1.0755	1.2016	2.2467	1.045	1.2089	1.9341	0.7252
1989Q2	1.9881	3.3817	1.3936	1.2149	3.3649	2.15	1.056	2.5693	1.5133	1.2075	2.3791	1.1715	0.7319	2.4059	1.674
1989Q3	1.672	3.8091	2.1371	1.2094	2.4177	1.2084	1.0545	2.0592	1.0047	1.5023	2.6193	1.117	1.572	2.314	0.742
1989Q4	-1.7718	1.3445	3.1163	1.2012	2.5453	1.3441	0.8935	2.216	1.3225	1.7712	2.5133	0.7421	1.7634	2.5273	0.7639
1990Q1	1.1204	3.3879	2.2676	1.782	2.4579	0.6759	2.0755	2.7388	0.6633	1.8485	2.6606	0.8122	1.9733	2.9486	0.9752
1990Q2	1.1861	2.3844	1.1983	1.7817	2.5254	0.7437	1.7666	2.6498	0.8832	2.2095	2.6324	0.4229	2.1853	2.493	0.3077
1990Q3	0.5995	2.7189	2.1194	0.4495	1.7943	1.3449	1.0465	2.4489	1.4024	0.7403	2.3817	1.6414	1.9975	2.6707	0.6732
1990Q4	-2.2013	-0.2956	1.9057	-1.7718	0.2965	2.0683	-0.2955	1.6784	1.9739	1.3331	2.2509	0.9178	1.7095	2.2696	0.5601
1991Q1	-2.2234	-0.2988	1.9245	-0.9386	1.1596	2.0983	1.3034	2.2619	0.9586	1.7977	3.0708	1.2731	1.9626	3.0198	1.0572
1991Q2	0	2.0272	2.0272	1.203	2.5606	1.3576	1.8038	2.7127	0.9089	2.0532	2.9849	0.9317	1.7738	2.6715	0.8977
1991Q3	1.6173	3.0107	1.3934	1.4853	2.6854	1.2001	1.6431	3.1253	1.4822	2.0702	3.1034	1.0332	2.0595	2.9131	0.8536
1991Q4	0.6967	1.5915	0.8947	1.4837	2.7464	1.2627	2.0666	2.9515	0.8849	2.2143	2.9249	0.7105	2.2237	3.1263	0.9026
1992Q1	0.9598	1.5788	0.6189	1.8	2.601	0.801	2.328	3.0837	0.7558	2.2794	3.17	0.8906	2.35	3.2132	0.8633
1992Q2	1.3588	2.3	0.9412	2.2534	2.9098	0.6564	2.2601	2.9958	0.7357	2.3	3.0255	0.7255	2.1	3.0831	0.983
1992Q3	1.7	2.6301	0.93	1.8037	2.632	0.8283	2.0703	2.7887	0.7185	2.1721	2.888	0.7159	2.2001	2.8852	0.6851
1992Q4	2.0297	2.7332	0.7035	2.0273	2.7118	0.6845	1.7	2.7653	1.0653	2.2343	3.1161	0.8818	2.2212	3.2015	0.9803
1993Q1	2.5	3	0.5001	2.2723	3.0792	0.8069	2.5512	3.6873	1.1361	2.6899	3.5024	0.8125	2.5351	3.2	0.6648
1993Q2	2.4536	3.4995	1.0459	2.5472	3.6427	1.0955	2.6037	3.4125	0.8089	2.3999	3.2036	0.8037	2.387	3.1547	0.7677
1993Q3	2.543	3.1	0.557	2.2401	3.1313	0.8911	2.0081	3.0505	1.0424	2.1863	2.7071	0.5208	2.1226	2.9	0.7774
1993Q4	2.856	3.4	0.544	1.7896	2.9969	1.2073	2.1999	3.1037	0.9037	2.3155	3.189	0.8735	2.3999	3	0.6001
1994Q1	2.419	3.0013	0.5824	2.3001	3.0325	0.7324	2.4977	3.1359	0.6383	2.3	2.9886	0.6886	2.0032	2.8556	0.8524
1994Q2	2.8782	3.6	0.7218	2.4424	2.9957	0.5533	2.3631	3.0339	0.6708	2.0046	2.6548	0.6502	2.1125	2.8651	0.7525
1994Q3	2.4999	3.4395	0.9396	2.2999	3.011	0.7111	2.1187	2.629	0.5103	2.0018	2.63	0.6281	2.0627	2.5475	0.4848
1994Q4	3.0124	3.882	0.8695	2.4533	3.1343	0.681	2.0502	2.95	0.8998	1.9983	2.5414	0.5431	1.8018	2.5936	0.7917
1995Q1	2.5001	3.3	0.8	2.3994	3.155	0.7556	2.1024	2.6423	0.5399	1.9661	2.4049	0.4388	2.0925	2.6015	0.509
1995Q2	1.7	2.7107	1.0106	2.1	2.9022	0.8022	2.0733	2.8	0.7267	1.8999	2.7476	0.8477	1.9	2.6935	0.7934
1995Q3	2.0336	2.7944	0.7608	1.9682	2.7057	0.7375	1.9786	2.7136	0.7351	1.9433	2.5506	0.6073	1.8	2.469	0.669
1995Q4	2.0001	2.5916	0.5915	2.0953	2.7577	0.6624	1.9696	2.5	0.5305	2.0643	2.6601	0.5958	1.909	2.501	0.592
1996Q1	0.9746	2.13	1.1554	1.7724	2.5567	0.7843	1.7195	2.4995	0.78	1.9148	2.5844	0.6696	1.9491	2.5601	0.611
1996Q2	1.8173	2.8	0.9827	1.6	2.5945	0.9945	1.713	2.3116	0.5986	1.8731	2.4	0.5269	1.8644	2.4	0.5356
1996Q3	1.6	2.5127	0.9127	2.0203	2.7105	0.6902	1.829	2.5764	0.7474	1.6221	2.3574	0.7353	1.7	2.5347	0.8347
1996Q4	2.2433	2.921	0.6777	2.0499	2.996	0.9461	1.914	2.3738	0.4598	1.7734	2.282	0.5086	2.0001	2.5001	0.5
1997Q1	2.362	3.3981	1.0361	2.0495	2.6008	0.5513	1.9382	2.6	0.6618	1.8332	2.6003	0.7671	1.912	2.6541	0.7421
1997Q2	1.7	2.5994	0.8995	2.1	2.9321	0.8321	2.1	2.8121	0.7121	1.8928	2.5	0.6072	1.7337	2.3565	0.6228
1997Q3	2.8004	3.567	0.7666	2.49	3.3118	0.8218	2.1937	2.9469	0.7532	1.9021	2.7	0.7979	1.8765	2.7487	0.8722
1997Q4	1.9665	3.1068	1.1402	2.1496	3.208	1.0583	2.2	2.8	0.6	1.995	2.7464	0.7514	1.8298	2.6523	0.8225
1998Q1	2.8093	3.9477	1.1384	2.5	3.176	0.676	2.3075	2.9726	0.6651	2.1217	3	0.8783	2.3314	2.9445	0.6131
1998Q2	2.8918	3.9165	1.0246	2.9866	3.4867	0.5	2.4416	3.1964	0.7547	2.4759	3.3232	0.8473	2.1357	2.9	0.7642
1998Q3	2.3535	3.8	1.4466	2.616	3.9929	1.3769	2.2807	3.1036	0.8229	2.2001	3	0.8	2.3019	2.9751	0.6731
1998Q4	3.0067	3.7351	0.7284	2.0899	2.5528	0.4629	1.9158	2.7999	0.8841	1.8299	2.6052	0.7753	2.1021	2.8	0.6978
1999Q1	3.168	4.05	0.8819	2.488	3.3726	0.8846	2.0775	3.1205	1.043	2.3202	3.1184	0.7982	1.7	2.5	0.8
1999Q2	2.8891	4.2213	1.3323	2.5563	3.3086	0.7524	2.21	3.391	1.181	1.6719	3.0309	1.359	2.0554	3.0468	0.9914
1999Q3	2.8377	3.606	0.7683	2.3853	3.3492	0.9639	2.0606	2.9998	0.9392	2.29	2.9999	0.7098	2.3074	3.0665	0.7591
1999Q4	2.8786	4	1.1214	1.8981	3.4	1.5019	2.4281	3.6279	1.1998	2.5027	3.4351	0.9324	2.2836	3.3008	1.0172
2000Q1	3.7026	4.6746	0.972	2.8803	3.5433	0.663	2.2652	3.6	1.3348	2.4976	3.1537	0.6561	2.1077	3	0.8923
2000Q2	3.0412	4.3	1.2588	2.9033	3.5867	0.6834	2.5566	3.511	0.9544	2.2202	3.1583	0.9381	2.2836	3.2442	0.9606
2000Q3	3.1224	3.9554	0.833	2.9	3.4553	0.5553	2.5	3.2469	0.7469	2.3876	3.2187	0.8311	2.4896	3.2403	0.7507
2000Q4	3	4.1774	1.1774	2.7491	3.3	0.5509	2.6224	3.2131	0.5907	2.6	3.3071	0.7072	2.8	3.2741	0.4741
2001Q1	1.5399	2.7512	1.2114	1.5894	2.5791	0.9897	2.4	3.2708	0.8708	2.8082	3.4779	0.6698	2.6918	3.6352	0.9434
2001Q2	1.1383	2.0964	0.9581	1.5624	2.5	0.9375	2.1919	3	0.8081	2.6458	3.5	0.8541	2.6	3.5011	0.9011
2001Q3	1.9	2.6733	0.7733	2.1958	3.4	1.2042	2.3478	3.1	0.7523	2.5	3.2	0.7	2.5104	3.2	0.6896
2001Q4	-0.6992	0.9245	1.6236	-1.6501	0.6837	2.3338	1.3329	2.9022	1.5694	2.0535	3.4257	1.3722	2.6001	3.7033	1.1032
2002Q1	-1.9101	0.8976	2.8076	1.135	2.5736	1.4386	1.9456	3.0934	1.1478	2.3133	3.4389	1.1257	2.45	3.5658	1.1158
2002Q2	2.2314	3.4698	1.2384	2.18	2.9	0.7201	2.3153	3.5946	1.2793	2.6696	3.6027	0.9331	2.648	3.3668	0.7188
2002Q3	2.5	3.8438	1.3438	1.9	2.8751	0.9751	2.5002	3.3339	0.8337	2.5914	3.1711	0.5797	2.8	3.4686	0.6686
2002Q4	0.5	1.8031	1.3031	2.1081	2.6849	0.5768	2.4974	3.1452	0.6478	2.568	3.297	0.7291	2.7527	3.6269	0.8742
2003Q1	1.4876	2.8986	1.4111	2.0291	3.1818	1.1528	2.55	3.4493	0.8993	2.9	3.529	0.629	2.8691	3.827	0.958
2003Q2	1.5767	2.6994	1.1227	2.4	3.5	1.1	2.7068	3.4532	0.7463	2.9128	3.626	0.7132	2.7522	3.5414	0.7892
2003Q3	3.019	4.0751	1.0561	2.7	3.4516	0.7516	3.0375	4.0608	1.0233	3.0028	3.7849	0.7821	2.9917	3.8557	0.864
2003Q4	1.3	3.2	1.9	2.9617	3.955	0.9933	3.0671	3.9235	0.8564	3.0364	4.0335	0.9971	3.1	3.9622	0.8622
2004Q1	3.05	4.1053	1.0553	3.3699	4	0.6301	3.2602	3.8522	0.5919	3.2994	3.7794	0.4799	2.9306	3.5	0.5694
2004Q2	3.4383	4.0953	0.6571	3.2	3.9705	0.7705	2.9624	3.6276	0.6653	2.9	3.7091	0.8091	3	4	1
2004Q3	2.5	3.4	0.9	2.7903	3.5	0.7097	2.9391	3.6	0.6609	2.9317	3.4999	0.5683	2.9556	3.5187	0.5631
2004Q4	2.7	3.3002	0.6002	2.7	3.5138	0.8138	2.5839	3.3688	0.7849	2.9069	3.5954	0.6885	3	3.7503	0.7503
2005Q1	2.8113	3.49	0.6786	2.8243	3.5241	0.6998	2.7783	3.3912	0.6129	2.6796	3.6244	0.9448	2.6185	3.4	0.7815
2005Q2	2.8295	3.6489	0.8194	3	3.5799	0.5799	2.9528	3.4999	0.5472	2.775	3.4629	0.6879	2.9237	3.4314	0.5078
2005Q3	3.0568	4.2378	1.1809	2.4675	3.4099	0.9424	2.802	3.5222	0.7202	2.7831	3.4337	0.6505	2.8994	3.4989	0.5996
2005Q4	0.2599	1.9984	1.7385	2.4954	3.8	1.3046	2.7046	3.6215	0.9169	2.6025	3.5	0.8975	2.8284	3.5096	0.6811
2006Q1	3	4.9936	1.9936	2.5	3.4	0.9	2.5547	3.3495	0.7947	2.5	3.2048	0.7048	2.3482	3.2	0.8518
2006Q2	2.4373	3.2121	0.7748	2.5	3.2467	0.7467	2.5112	3.1331	0.6219	2.4554	3.1472	0.6919	2.5	3	0.5
2006Q3	2.4903	3.2092	0.7189	2.1117	3.0353	0.9236	2.3672	3.0032	0.636	2.305	2.893	0.588	2.4988	3.1	0.6012
2006Q4	2.5	3.4392	0.9392	2.4084	3	0.5916	2.2257	2.9433	0.7177	2.4812	2.8327	0.3515	2.4285	3.0295	0.601
2007Q1	2.7928	3.5648	0.772	2.2695	3.0218	0.7523	2.5523	3.079	0.5267	2.6959	3.0655	0.3696	2.5249	3.0462	0.5214
2007Q2	1.9	2.5	0.6	2.214	2.9317	0.7177	2.4142	2.962	0.5478	2.554	3.1	0.546	2.5	2.9622	0.4622
2007Q3	1.8	2.5	0.7	1.9992	2.8	0.8008	2.008	2.8	0.792	2.1556	2.8016	0.646	2.2507	2.8356	0.5849
2007Q4	1.5897	2.3079	0.7182	1.7338	2.4	0.6662	1.9875	2.5	0.5125	2.0036	2.7257	0.7222	2.2878	2.8749	0.5872
2008Q1	0.3024	1.4557	1.1533	0.8984	2.0737	1.1753	1.7232	2.9145	1.1914	1.9098	2.8075	0.8978	2	2.7709	0.7709
2008Q2	0.3002	1.5	1.1998	1.5331	3.0076	1.4746	0.4882	2.1648	1.6766	1	2.142	1.142	1.7673	2.5255	0.7582
2008Q3	-0.024	1.3	1.324	-0.74	0.9619	1.7019	0.2118	1.8	1.5882	1.1104	2.4006	1.2902	1.6831	2.5019	0.8188
2008Q4	-4	-1.7772	2.2228	-1.5	0.8899	2.3899	0.1198	1.8122	1.6924	1.157	2.2846	1.1277	1.4536	2.5475	1.0939
2009Q1	-3.1	-1.5833	1.5167	-1.5295	0.945	2.4745	0.0052	2.4404	2.4352	1	2.3879	1.3879	1.5	2.5	1
2009Q2	-0.9704	1.0038	1.9741	0.0485	2	1.9515	1	2.1614	1.1614	1.3586	2.4524	1.0938	1.6	2.6255	1.0255
2009Q3	1	2.2571	1.2571	0.6953	1.7466	1.0513	1.1	2.1766	1.0766	1.5266	2.3467	0.8201	1.5	2.5412	1.0412
2009Q4	0.2	1.7	1.5	1	2.2182	1.2182	1.5	2.2	0.7	1.8	2.749	0.949	1.8523	2.7642	0.9118
2010Q1	1.5803	2.2182	0.6379	1.7031	2.5991	0.896	1.8	2.7	0.9	2	2.8768	0.8768	1.9042	2.851	0.9468
2010Q2	2.2508	3.5	1.2492	2.1964	3.2781	1.0817	2.1817	3.2297	1.0479	2.0196	3	0.9804	2.2538	3	0.7463
2010Q3	1.8605	2.5151	0.6546	1.9	2.5137	0.6137	1.9774	2.6002	0.6228	2.1166	3	0.8834	2.2	3.04	0.84
2010Q4	2.0554	2.8	0.7446	1.9711	2.6994	0.7283	1.8581	2.8	0.9419	2.2457	2.9	0.6543	2.2	3.1502	0.9502
2011Q1	2.5439	3.5	0.9561	2.5	3.5	1	2.6222	3.4	0.7778	2.6554	3.3501	0.6948	2.2777	2.9984	0.7207
2011Q2	2.4	3.0364	0.6364	2.475	3.1341	0.6591	2.5924	3.3138	0.7213	2.2875	2.9466	0.6591	2.3387	3.0012	0.6625
2011Q3	1.6459	2.4494	0.8035	1.6492	2.5018	0.8526	1.678	2.5	0.822	2.1104	2.5291	0.4187	2.0545	2.8	0.7455
2011Q4	2	2.6	0.6	1.8	2.4268	0.6268	2	2.5	0.5	2.0336	2.5778	0.5441	2.1637	2.8341	0.6704
2012Q1	1.9216	2.8151	0.8936	2.1277	2.5597	0.432	2.1103	2.7	0.5897	2.1178	2.817	0.6991	2	2.8936	0.8936
2012Q2	2.0792	2.5	0.4208	2.2	2.6	0.4	2.0777	2.843	0.7652	1.9738	2.6734	0.6997	2.1	2.8512	0.7512
2012Q3	1.5113	2.2988	0.7875	1.6096	2.5012	0.8915	1.5977	2.4016	0.8039	2	2.3857	0.3857	2.0497	2.7672	0.7175
2012Q4	1.8469	2.5458	0.6989	1.3493	2.2051	0.8558	1.8527	2.4	0.5473	2	2.5398	0.5398	2.2	2.8269	0.6269
2013Q1	1.2054	2.0881	0.8827	1.5085	2.2017	0.6933	2.0151	2.6017	0.5866	2.0557	2.6263	0.5707	2.2342	2.9	0.6658
2013Q2	1.6822	2.4	0.7178	2	2.7998	0.7998	2.1537	2.9126	0.7589	2.2	2.8817	0.6817	2.2	2.8028	0.6028
2013Q3	2	2.42	0.42	2	2.6756	0.6756	2.1	2.8511	0.7511	2.3251	2.93	0.6049	2.34	3	0.66
2013Q4	2	2.451	0.451	2.269	2.7415	0.4724	2.3	2.8225	0.5225	2.2468	2.7939	0.5471	2.3397	2.8	0.4603
2014Q1	2.2379	2.8	0.5621	2.3	2.9917	0.6917	2.4004	2.9017	0.5013	2.5	3.1069	0.6069	2.4474	3.083	0.6356
2014Q2	2.3374	3.3032	0.9658	2.2218	3.2	0.9782	2.5	3.2386	0.7386	2.5021	3.0595	0.5574	2.4853	3.0406	0.5553
2014Q3	2.3	2.9073	0.6073	2.5	3.1466	0.6466	2.3199	3.1997	0.8798	2.3897	3.2262	0.8364	2.4	3.042	0.642
2014Q4	2.3183	2.84	0.5217	2.4	3.1094	0.7094	2.3336	3	0.6664	2.3	3	0.7	2.4	2.8	0.4
2015Q1	2.8	3.7882	0.9882	2.8	3.6049	0.8049	2.6663	3.5	0.8337	2.6	3.25	0.65	2.4	3.2126	0.8126
2015Q2	2.7999	3.5	0.7001	2.8	3.3458	0.5458	2.6	3.3783	0.7783	2.3	3	0.7	2.4684	2.96	0.4916
2015Q3	2.7633	3.2923	0.529	2.6254	3.2324	0.607	2.4	3.1321	0.7321	2.5	3.0339	0.5339	2.467	2.95	0.483
2015Q4	2.7397	3.1877	0.448	2.6468	3.0396	0.3928	2.6	3.1001	0.5001	2.5	3.0675	0.5675	2.458	2.996	0.538
2016Q1	2.3	2.9408	0.6409	2.5	2.9269	0.4269	2.2986	2.903	0.6044	2.2248	2.7287	0.5039	2.1	2.5235	0.4235
2016Q2	2.4	2.8295	0.4295	2.3993	2.7105	0.3112	2.3	2.6901	0.3901	2.1166	2.5564	0.4398	2.2505	2.6271	0.3766
2016Q3	2.3481	3.0403	0.6922	2.1948	2.689	0.4942	2.1	2.5	0.4	2.3	2.6	0.3	2.2	2.6334	0.4334
2016Q4	2.0993	2.7112	0.6119	2.086	2.5235	0.4376	2.2491	2.6	0.3509	2.231	2.5	0.269	2.0003	2.5	0.4997
2017Q1	2.2182	2.7144	0.4962	2.3	2.7429	0.4429	2.3	2.7322	0.4322	2.2182	2.7331	0.5149	2.2	2.8087	0.6087
2017Q2	2.5	3.0772	0.5772	2.2	2.8295	0.6295	2.2	2.646	0.446	2	2.7	0.7	2	2.9837	0.9837
2017Q3	2.101	2.6858	0.5849	2	2.6193	0.6193	2.032	2.7051	0.6731	2.0513	2.9203	0.869	2.069	2.9766	0.9077
2017Q4	2.459	2.9039	0.4449	2	2.5822	0.5822	2.2	2.6273	0.4273	2.1175	2.5868	0.4693	2	2.5242	0.5242
2018Q1	2.5	3.02	0.52	2.4098	2.9324	0.5226	2.2816	2.8	0.5184	2.2674	2.7931	0.5257	2.1583	2.7345	0.5762
2018Q2	2.6	3.0339	0.4339	2.449	3.0551	0.6061	2.3	2.8329	0.5329	2.1073	2.5092	0.4018	2.1599	2.6795	0.5195
2018Q3	2.36	2.9	0.54	2.2921	2.76	0.4679	2.0593	2.495	0.4357	2.1	2.5913	0.4913	1.9298	2.5008	0.5711
2018Q4	2.6	3.2	0.6	2.193	2.6857	0.4927	2.1275	2.8605	0.733	2.1166	2.7719	0.6553	1.8	2.5305	0.7305
2019Q1	1.3064	2.617	1.3106	2.4	2.8161	0.4161	2.1166	2.6	0.4834	2	2.6	0.6	2	2.53	0.53
2019Q2	2.4999	3.0235	0.5236	1.9665	2.6534	0.6869	2	2.5	0.5	1.8844	2.5	0.6156	1.8818	2.5053	0.6235
2019Q3	1.9594	2.5995	0.6401	1.9836	2.4	0.4164	1.78	2.4839	0.7039	2.049	2.4253	0.3763	1.8381	2.4623	0.6242
2019Q4	2.1268	2.4737	0.3469	1.8925	2.3959	0.5035	1.9724	2.5229	0.5505	1.8865	2.4916	0.6051	1.6671	2.4388	0.7717
2020Q1	1.8771	2.5	0.6229	1.9	2.5	0.6	1.889	2.4695	0.5805	1.9372	2.4331	0.4959	1.9794	2.3113	0.3319
2020Q2	-41.4026	-23	18.4026	5.4	22.6	17.2	3.8432	12.5541	8.7109	2.1	7.4493	5.3493	2.4624	6.7052	4.2428
2020Q3	19.0325	31.0796	12.0471	2.5	7.8015	5.3015	2.3931	5.0441	2.651	2.4029	4.0709	1.668	2.6255	4.5234	1.898
2020Q4	3.5	6.1635	2.6635	2.4	4.6868	2.2868	2.3	4.2903	1.9903	2.4496	4	1.5504	2.3199	3.5708	1.2509
2021Q1	1.5042	3.9172	2.413	4.3786	8	3.6214	4.4067	6.9808	2.5741	3.8746	6.0301	2.1555	2.6782	5	2.3218
2021Q2	7.11	11.4386	4.3285	5.1268	7.0547	1.9279	3.7525	5.95	2.1975	2.8856	4.8267	1.9411	2.4217	4	1.5783
2021Q3	3.4	7	3.6	3.5742	5.5	1.9258	2.7016	4.1	1.3984	2.6	3.7	1.1	2.4383	3.2005	0.7623
2021Q4	3.5742	4.8643	1.2901	2.7307	4.1581	1.4274	2.5031	3.5	0.9969	2.4	3.1257	0.7257	2.1812	2.9065	0.7253

## Sheet: RNRESIN
Measures of Cross-Sectional Dispersion for Quarterly Forecasts for REAL NONRESIDENTIAL FIXED INVESTMENT (RNRESIN)
Units: Annualized Percentage Points
Dispersion Measure D2 = 75th Percentile Minus 25th Percentile of the Forecasts for Q/Q Growth
P25 = 25th Percentile of the Forecasts for Q/Q Growth
P75 = 75th Percentile of the Forecasts for Q/Q Growth
At Each Survey Date T, the Quarterly Horizons Are T, T+1, T+2, T+3, and T+4
Survey_Date(T)	RNRESIN_P25_D2(T)	RNRESIN_P75_D2(T)	RNRESIN_D2(T)	RNRESIN_P25_D2(T+1)	RNRESIN_P75_D2(T+1)	RNRESIN_D2(T+1)	RNRESIN_P25_D2(T+2)	RNRESIN_P75_D2(T+2)	RNRESIN_D2(T+2)	RNRESIN_P25_D2(T+3)	RNRESIN_P75_D2(T+3)	RNRESIN_D2(T+3)	RNRESIN_P25_D2(T+4)	RNRESIN_P75_D2(T+4)	RNRESIN_D2(T+4)
1968Q4	#N/A	#N/A	#N/A	#N/A	#N/A	#N/A	#N/A	#N/A	#N/A	#N/A	#N/A	#N/A	#N/A	#N/A	#N/A
1969Q1	#N/A	#N/A	#N/A	#N/A	#N/A	#N/A	#N/A	#N/A	#N/A	#N/A	#N/A	#N/A	#N/A	#N/A	#N/A
1969Q2	#N/A	#N/A	#N/A	#N/A	#N/A	#N/A	#N/A	#N/A	#N/A	#N/A	#N/A	#N/A	#N/A	#N/A	#N/A
1969Q3	#N/A	#N/A	#N/A	#N/A	#N/A	#N/A	#N/A	#N/A	#N/A	#N/A	#N/A	#N/A	#N/A	#N/A	#N/A
1969Q4	#N/A	#N/A	#N/A	#N/A	#N/A	#N/A	#N/A	#N/A	#N/A	#N/A	#N/A	#N/A	#N/A	#N/A	#N/A
1970Q1	#N/A	#N/A	#N/A	#N/A	#N/A	#N/A	#N/A	#N/A	#N/A	#N/A	#N/A	#N/A	#N/A	#N/A	#N/A
1970Q2	#N/A	#N/A	#N/A	#N/A	#N/A	#N/A	#N/A	#N/A	#N/A	#N/A	#N/A	#N/A	#N/A	#N/A	#N/A
1970Q3	#N/A	#N/A	#N/A	#N/A	#N/A	#N/A	#N/A	#N/A	#N/A	#N/A	#N/A	#N/A	#N/A	#N/A	#N/A
1970Q4	#N/A	#N/A	#N/A	#N/A	#N/A	#N/A	#N/A	#N/A	#N/A	#N/A	#N/A	#N/A	#N/A	#N/A	#N/A
1971Q1	#N/A	#N/A	#N/A	#N/A	#N/A	#N/A	#N/A	#N/A	#N/A	#N/A	#N/A	#N/A	#N/A	#N/A	#N/A
1971Q2	#N/A	#N/A	#N/A	#N/A	#N/A	#N/A	#N/A	#N/A	#N/A	#N/A	#N/A	#N/A	#N/A	#N/A	#N/A
1971Q3	#N/A	#N/A	#N/A	#N/A	#N/A	#N/A	#N/A	#N/A	#N/A	#N/A	#N/A	#N/A	#N/A	#N/A	#N/A
1971Q4	#N/A	#N/A	#N/A	#N/A	#N/A	#N/A	#N/A	#N/A	#N/A	#N/A	#N/A	#N/A	#N/A	#N/A	#N/A
1972Q1	#N/A	#N/A	#N/A	#N/A	#N/A	#N/A	#N/A	#N/A	#N/A	#N/A	#N/A	#N/A	#N/A	#N/A	#N/A
1972Q2	#N/A	#N/A	#N/A	#N/A	#N/A	#N/A	#N/A	#N/A	#N/A	#N/A	#N/A	#N/A	#N/A	#N/A	#N/A
1972Q3	#N/A	#N/A	#N/A	#N/A	#N/A	#N/A	#N/A	#N/A	#N/A	#N/A	#N/A	#N/A	#N/A	#N/A	#N/A
1972Q4	#N/A	#N/A	#N/A	#N/A	#N/A	#N/A	#N/A	#N/A	#N/A	#N/A	#N/A	#N/A	#N/A	#N/A	#N/A
1973Q1	#N/A	#N/A	#N/A	#N/A	#N/A	#N/A	#N/A	#N/A	#N/A	#N/A	#N/A	#N/A	#N/A	#N/A	#N/A
1973Q2	#N/A	#N/A	#N/A	#N/A	#N/A	#N/A	#N/A	#N/A	#N/A	#N/A	#N/A	#N/A	#N/A	#N/A	#N/A
1973Q3	#N/A	#N/A	#N/A	#N/A	#N/A	#N/A	#N/A	#N/A	#N/A	#N/A	#N/A	#N/A	#N/A	#N/A	#N/A
1973Q4	#N/A	#N/A	#N/A	#N/A	#N/A	#N/A	#N/A	#N/A	#N/A	#N/A	#N/A	#N/A	#N/A	#N/A	#N/A
1974Q1	#N/A	#N/A	#N/A	#N/A	#N/A	#N/A	#N/A	#N/A	#N/A	#N/A	#N/A	#N/A	#N/A	#N/A	#N/A
1974Q2	#N/A	#N/A	#N/A	#N/A	#N/A	#N/A	#N/A	#N/A	#N/A	#N/A	#N/A	#N/A	#N/A	#N/A	#N/A
1974Q3	#N/A	#N/A	#N/A	#N/A	#N/A	#N/A	#N/A	#N/A	#N/A	#N/A	#N/A	#N/A	#N/A	#N/A	#N/A
1974Q4	#N/A	#N/A	#N/A	#N/A	#N/A	#N/A	#N/A	#N/A	#N/A	#N/A	#N/A	#N/A	#N/A	#N/A	#N/A
1975Q1	#N/A	#N/A	#N/A	#N/A	#N/A	#N/A	#N/A	#N/A	#N/A	#N/A	#N/A	#N/A	#N/A	#N/A	#N/A
1975Q2	#N/A	#N/A	#N/A	#N/A	#N/A	#N/A	#N/A	#N/A	#N/A	#N/A	#N/A	#N/A	#N/A	#N/A	#N/A
1975Q3	#N/A	#N/A	#N/A	#N/A	#N/A	#N/A	#N/A	#N/A	#N/A	#N/A	#N/A	#N/A	#N/A	#N/A	#N/A
1975Q4	#N/A	#N/A	#N/A	#N/A	#N/A	#N/A	#N/A	#N/A	#N/A	#N/A	#N/A	#N/A	#N/A	#N/A	#N/A
1976Q1	#N/A	#N/A	#N/A	#N/A	#N/A	#N/A	#N/A	#N/A	#N/A	#N/A	#N/A	#N/A	#N/A	#N/A	#N/A
1976Q2	#N/A	#N/A	#N/A	#N/A	#N/A	#N/A	#N/A	#N/A	#N/A	#N/A	#N/A	#N/A	#N/A	#N/A	#N/A
1976Q3	#N/A	#N/A	#N/A	#N/A	#N/A	#N/A	#N/A	#N/A	#N/A	#N/A	#N/A	#N/A	#N/A	#N/A	#N/A
1976Q4	#N/A	#N/A	#N/A	#N/A	#N/A	#N/A	#N/A	#N/A	#N/A	#N/A	#N/A	#N/A	#N/A	#N/A	#N/A
1977Q1	#N/A	#N/A	#N/A	#N/A	#N/A	#N/A	#N/A	#N/A	#N/A	#N/A	#N/A	#N/A	#N/A	#N/A	#N/A
1977Q2	#N/A	#N/A	#N/A	#N/A	#N/A	#N/A	#N/A	#N/A	#N/A	#N/A	#N/A	#N/A	#N/A	#N/A	#N/A
1977Q3	#N/A	#N/A	#N/A	#N/A	#N/A	#N/A	#N/A	#N/A	#N/A	#N/A	#N/A	#N/A	#N/A	#N/A	#N/A
1977Q4	#N/A	#N/A	#N/A	#N/A	#N/A	#N/A	#N/A	#N/A	#N/A	#N/A	#N/A	#N/A	#N/A	#N/A	#N/A
1978Q1	#N/A	#N/A	#N/A	#N/A	#N/A	#N/A	#N/A	#N/A	#N/A	#N/A	#N/A	#N/A	#N/A	#N/A	#N/A
1978Q2	#N/A	#N/A	#N/A	#N/A	#N/A	#N/A	#N/A	#N/A	#N/A	#N/A	#N/A	#N/A	#N/A	#N/A	#N/A
1978Q3	#N/A	#N/A	#N/A	#N/A	#N/A	#N/A	#N/A	#N/A	#N/A	#N/A	#N/A	#N/A	#N/A	#N/A	#N/A
1978Q4	#N/A	#N/A	#N/A	#N/A	#N/A	#N/A	#N/A	#N/A	#N/A	#N/A	#N/A	#N/A	#N/A	#N/A	#N/A
1979Q1	#N/A	#N/A	#N/A	#N/A	#N/A	#N/A	#N/A	#N/A	#N/A	#N/A	#N/A	#N/A	#N/A	#N/A	#N/A
1979Q2	#N/A	#N/A	#N/A	#N/A	#N/A	#N/A	#N/A	#N/A	#N/A	#N/A	#N/A	#N/A	#N/A	#N/A	#N/A
1979Q3	#N/A	#N/A	#N/A	#N/A	#N/A	#N/A	#N/A	#N/A	#N/A	#N/A	#N/A	#N/A	#N/A	#N/A	#N/A
1979Q4	#N/A	#N/A	#N/A	#N/A	#N/A	#N/A	#N/A	#N/A	#N/A	#N/A	#N/A	#N/A	#N/A	#N/A	#N/A
1980Q1	#N/A	#N/A	#N/A	#N/A	#N/A	#N/A	#N/A	#N/A	#N/A	#N/A	#N/A	#N/A	#N/A	#N/A	#N/A
1980Q2	#N/A	#N/A	#N/A	#N/A	#N/A	#N/A	#N/A	#N/A	#N/A	#N/A	#N/A	#N/A	#N/A	#N/A	#N/A
1980Q3	#N/A	#N/A	#N/A	#N/A	#N/A	#N/A	#N/A	#N/A	#N/A	#N/A	#N/A	#N/A	#N/A	#N/A	#N/A
1980Q4	#N/A	#N/A	#N/A	#N/A	#N/A	#N/A	#N/A	#N/A	#N/A	#N/A	#N/A	#N/A	#N/A	#N/A	#N/A
1981Q1	#N/A	#N/A	#N/A	#N/A	#N/A	#N/A	#N/A	#N/A	#N/A	#N/A	#N/A	#N/A	#N/A	#N/A	#N/A
1981Q2	#N/A	#N/A	#N/A	#N/A	#N/A	#N/A	#N/A	#N/A	#N/A	#N/A	#N/A	#N/A	#N/A	#N/A	#N/A
1981Q3	-2.4921	0	2.4921	-1.5031	5.0784	6.5815	2.4702	5.1611	2.6909	2.5236	7.2314	4.7077	4.9375	7.5917	2.6542
1981Q4	-7.2477	-2.4614	4.7862	-4.968	0	4.968	-2.5396	2.5889	5.1284	2.5722	7.7635	5.1913	5.8167	10.9492	5.1325
1982Q1	-9.6895	-2.4921	7.1974	-4.999	0	4.999	0	5.1602	5.1602	1.5594	7.814	6.2546	2.6057	7.8652	5.2595
1982Q2	-14.0119	-4.8476	9.1643	-7.4732	0	7.4732	-4.999	2.4614	7.4604	0	5.2586	5.2586	2.4315	7.6643	5.2328
1982Q3	-13.6927	-5.1301	8.5626	-11.9262	-2.388	9.5382	-4.968	4.3886	9.3566	-2.5396	5.262	7.8016	0	7.8652	7.8652
1982Q4	-11.8207	-4.8771	6.9436	-7.427	0	7.427	-2.5396	4.1634	6.703	0	5.2969	5.2969	0	7.6157	7.6157
1983Q1	-9.6312	-4.907	4.7242	-5.1271	0	5.1271	-2.6577	5.368	8.0256	0	7.6157	7.6157	5.1602	7.814	2.6538
1983Q2	-5.0852	0	5.0852	0	4.999	4.999	2.4614	5.0623	2.6009	4.8476	7.4273	2.5796	4.9166	7.5677	2.6511
1983Q3	2.4874	5.0305	2.543	2.5077	7.6643	5.1566	3.2274	7.4735	4.2461	4.999	9.5174	4.5183	4.7896	9.5377	4.7481
1983Q4	7.2919	12.3699	5.078	4.7611	9.5174	4.7563	6.9139	9.4611	2.5472	6.8352	9.1896	2.3544	4.597	8.7861	4.1892
1984Q1	4.3237	11.5161	7.1924	4.597	10.228	5.6311	5.9114	10.8896	4.9782	4.4937	8.8346	4.3409	4.4315	8.467	4.0355
1984Q2	6.6094	11.1941	4.5847	6.467	8.7382	2.2712	6.3305	8.5515	2.2209	4.1232	9.1236	5.0005	4.1445	6.179	2.0345
1984Q3	12.294	16.7201	4.4261	9.8209	13.8079	3.9869	5.8953	9.5858	3.6905	3.6693	7.4388	3.7694	1.8823	7.2698	5.3875
1984Q4	4.3237	12.1081	7.7844	4.4708	9.3324	4.8617	5.6193	7.6157	1.9965	3.8643	7.4561	3.5918	3.6198	7.491	3.8712
1985Q1	5.7539	9.6319	3.8779	5.6351	9.4055	3.7705	4.7502	7.4735	2.7233	3.6032	7.1401	3.5369	3.4629	7.0458	3.5829
1985Q2	3.7911	7.6521	3.861	3.7467	7.5085	3.7619	3.661	7.3534	3.6924	1.8058	5.516	3.7101	3.5395	5.3921	1.8526
1985Q3	2.7626	7.1878	4.4252	2.7333	6.4095	3.6762	1.7897	4.5103	2.7206	0.8791	5.356	4.4769	0	5.4657	5.4657
1985Q4	1.8475	6.2027	4.3551	0	5.516	5.516	1.8058	3.7033	1.8975	1.7977	3.7033	1.9056	0	5.344	5.344
1986Q1	-1.6393	3.34	4.9793	0.8256	5.0623	4.2367	1.6529	3.4615	1.8086	1.6096	4.1445	2.5349	-2.8541	3.5755	6.4296
1986Q2	-0.8484	3.805	4.6533	0	5.2163	5.2163	1.6806	6.1051	4.4245	0	5.041	5.041	0	4.136	4.136
1986Q3	-4.2404	0.176	4.4165	0	1.7582	1.7582	-2.6006	1.7857	4.3863	0	3.5008	3.5008	0.8743	5.0087	4.1344
1986Q4	0	2.8302	2.8302	-8.9631	0	8.9631	0	4.1237	4.1237	0.8919	3.5319	2.6401	3.0231	6.8227	3.7996
1987Q1	-2.6343	1.7582	4.3925	0.1796	4.4686	4.289	1.7505	4.4192	2.6687	1.7738	4.9479	3.1741	2.281	4.7776	2.4965
1987Q2	1.3611	7.7184	6.3573	2.5679	5.4728	2.9049	2.3567	5.3743	3.0176	1.764	4.4192	2.6552	2.6577	6.0392	3.3815
1987Q3	3.5469	7.5797	4.0327	3.7033	6.4422	2.7388	1.9123	4.5603	2.648	2.6754	4.5191	1.8436	-0.0885	5.38	5.4685
1987Q4	2.6228	7.2457	4.6229	0	3.7101	3.7101	0	5.8746	5.8746	-3.2962	4.3237	7.6199	1.6985	4.2775	2.579
1988Q1	2.6343	9.9138	7.2795	0	6.0655	6.0655	1.2641	5.1714	3.9073	0	5.02	5.02	0.6653	6.5237	5.8585
1988Q2	-1.3853	5.3455	6.7309	1.512	6.8181	5.3061	1.7259	6.5051	4.7792	1.5913	6.0124	4.4211	1.5441	5.5323	3.9882
1988Q3	4.1531	9.1275	4.9744	3.2784	7.4735	4.1951	2.4217	7.2044	4.7827	1.6	4.8476	3.2476	0.7944	5.4622	4.6677
1988Q4	3.5153	7.458	3.9428	4.0604	7.3067	3.2463	4.0035	5.5808	1.5773	3.9404	5.504	1.5636	3.1066	4.6959	1.5893
1989Q1	4.3094	9.2865	4.9771	4.0604	6.3915	2.3311	3.1432	5.6735	2.5303	-1.5936	5.441	7.0345	-2.7781	3.8944	6.6725
1989Q2	3.8399	9.4236	5.5837	3.1924	8.0606	4.8682	0.388	3.9796	3.5917	-2.718	2.3598	5.0778	0	3.8643	3.8643
1989Q3	2.6124	5.4388	2.8263	1.5564	3.1494	1.593	0	3.1309	3.1309	0.7805	3.8273	3.0468	2.3054	3.842	1.5366
1989Q4	0	3.1248	3.1248	1.3843	3.1126	1.7283	1.1679	3.0767	1.9088	0.804	3.0474	2.2434	1.518	5.7187	4.2007
1990Q1	1.5655	5.3168	3.7513	0.779	3.8643	3.0853	1.5504	3.0945	1.5442	2.2705	4.6235	2.353	1.5414	3.8127	2.2713
1990Q2	-0.779	2.797	3.576	0	3.481	3.481	0.7851	1.5414	0.7563	1.5296	3.665	2.1354	2.2834	4.5951	2.3117
1990Q3	-0.2367	4.7896	5.0263	-1.8051	1.581	3.3861	-1.5471	1.5873	3.1343	-1.6064	2.3598	3.9662	-1.1723	3.9684	5.1408
1990Q4	-8.016	-2.2966	5.7195	-6.1876	-1.5625	4.6252	-4.0686	0.309	4.3776	-2.3323	2.4459	4.7781	0.7835	3.3334	2.5498
1991Q1	-9.0335	-6.0167	3.0168	-5.9899	-2.0476	3.9423	-2.388	1.839	4.227	0	3.2386	3.2386	1.7043	6.3365	4.6321
1991Q2	-10.673	-4.4861	6.1869	-3.2717	1.8796	5.1513	1.2296	4.1189	2.8893	2.354	6.2776	3.9235	3.4902	7.8124	4.3222
1991Q3	-3.1997	0.6495	3.8492	0.7381	4.1274	3.3893	2.4665	6.0194	3.5529	4.077	6.9693	2.8923	3.9144	7.0115	3.097
1991Q4	-5.9437	1.3493	7.293	-0.7897	3.8212	4.611	1.9942	5.4884	3.4943	3.2452	6.4108	3.1657	3.902	6.4786	2.5766
1992Q1	-3.2002	0.4997	3.6998	0.5566	3.2999	2.7433	2.3738	6.5612	4.1874	3.5177	7.5002	3.9825	3.1217	7.4505	4.3288
1992Q2	-0.238	2.6465	2.8845	2.3994	5.977	3.5776	3.563	8.2018	4.6389	3.8531	8.403	4.5499	3.9005	7.8032	3.9027
1992Q3	1.0201	3.8053	2.7852	1.1759	4.8265	3.6506	3.137	6.3367	3.1997	3.6112	6.9486	3.3374	3.4509	7.2435	3.7926
1992Q4	1.0927	4.7816	3.6888	2.8884	6.7051	3.8167	3.2287	7.3668	4.1381	4.5997	8.0253	3.4256	5.0945	9.0951	4.0006
1993Q1	4.0542	7.8998	3.8456	5.3039	9.5467	4.2428	5.1003	9.6	4.4997	3.265	8.0001	4.7351	4.0004	7.0846	3.0841
1993Q2	5.5369	9.3804	3.8436	5.276	8.267	2.991	5.5317	9.266	3.7343	4.0115	8.0005	3.989	3.9369	8.0006	4.0637
1993Q3	2.9349	7	4.0651	4	7.4735	3.4735	4.2248	7.9407	3.7159	3.8107	7.0099	3.1992	3.3	7.3	4
1993Q4	5.4335	9.5613	4.1279	4.5606	8.2998	3.7392	4.6999	8.1222	3.4223	3.9534	7.761	3.8076	4.5758	7.6046	3.0288
1994Q1	5.6965	9.4898	3.7933	5.3903	9.075	3.6847	3.4551	8.8004	5.3453	4.6966	8.6505	3.9539	3.2174	6.9698	3.7524
1994Q2	8.3001	14.9668	6.6667	5.4384	10.3002	4.8618	4.1997	9.3701	5.1704	4.0999	7.0351	2.9353	4.0001	6.8601	2.86
1994Q3	5.8001	11.3139	5.5138	5.9136	10.4052	4.4916	4.786	7.6746	2.8886	3.5203	7.077	3.5567	2.9632	6.727	3.7638
1994Q4	7.5971	12.7629	5.1658	6.122	9.5676	3.4456	5.0265	8.0146	2.988	3.7001	7.3001	3.6	3.1033	6.8291	3.7257
1995Q1	8.1	11.6611	3.561	7.085	10.6714	3.5864	5.0896	8.5637	3.4741	4.2482	6.9829	2.7348	2.746	5.3626	2.6167
1995Q2	6.5884	12.372	5.7837	5.4484	9.0633	3.6149	3.3002	6.747	3.4468	3.4997	6.0742	2.5746	2.7002	5.8225	3.1223
1995Q3	6.3267	8.9076	2.5809	4.4703	7.7204	3.2501	3.6	6.8636	3.2636	3.4161	6.4847	3.0686	2.981	5.5091	2.528
1995Q4	4.9606	7.9999	3.0393	4.3001	6.4941	2.1939	3.7796	5.9758	2.1962	3.3498	5.9314	2.5816	3.0001	5.7055	2.7053
1996Q1	1.7622	5.1038	3.3416	3.4501	5.35	1.8999	2.6898	5.0002	2.3103	2.0124	4.892	2.8796	2.579	5.3002	2.7212
1996Q2	3.2999	6.2	2.9001	2.9997	4.8805	1.8808	2.2068	4.3929	2.1861	2.1024	4.0795	1.9771	2.1191	4.9318	2.8127
1996Q3	4.1003	6.774	2.6738	3.2083	5.3925	2.1842	3.3254	4.9429	1.6176	2.5961	4.7601	2.164	1.6183	5.1338	3.5154
1996Q4	3.8001	7.6802	3.8801	3.9915	7.1733	3.1818	3.5807	5.1075	1.5269	3.5073	5.1338	1.6264	2.9775	4.9928	2.0153
1997Q1	5.2	7.981	2.781	4.7671	7.2044	2.4373	4.3001	6.5	2.1999	3.6998	5.5001	1.8003	3.4995	5.8343	2.3348
1997Q2	5.2054	9.2409	4.0355	4.4465	8.6594	4.2129	4.2759	6.9732	2.6973	4.0409	6.8469	2.806	3.4017	5.9499	2.5482
1997Q3	6.0515	10.1499	4.0984	5.6578	8.0487	2.3909	5.3	7.7169	2.4169	4.2507	6.7259	2.4752	3.3334	5.8975	2.5641
1997Q4	5.9902	11.1998	5.2096	5.3003	9.2565	3.9562	5.1353	7.7107	2.5754	4.5001	7.0614	2.5613	2.8002	6.4949	3.6948
1998Q1	7.4956	12.8058	5.3102	5.441	9.4002	3.9592	5.223	7.4997	2.2768	3.7998	6.1233	2.3235	3.9001	6.8061	2.9061
1998Q2	6.2607	12.0002	5.7395	6.9512	9.2089	2.2577	5.7907	8.2712	2.4806	4.3901	7.3997	3.0096	4.1445	6.3526	2.208
1998Q3	4.6967	11.0999	6.4032	4.1879	8.5515	4.3635	4	6.2319	2.232	3.6	5.3	1.7	4.0196	5.6553	1.6357
1998Q4	4.4875	9.2159	4.7284	1.8421	6.1618	4.3198	2.4688	5.9255	3.4567	2.8001	6.2667	3.4666	2.9035	6.1897	3.2861
1999Q1	5.9998	10.7221	4.7223	4.4999	8.9916	4.4916	4.1478	7.0999	2.9521	3.5454	7.5002	3.9548	2.3327	6.6003	4.2675
1999Q2	5.5	10	4.5	3.0767	8.2358	5.1591	2.8439	7.2002	4.3563	1.9445	7.5725	5.628	2.7998	7.4576	4.6578
1999Q3	4.106	9.7999	5.6938	3.0767	7.8013	4.7246	1.7353	8.6002	6.8648	3.5001	7.5439	4.0438	3.4299	6.9001	3.4702
1999Q4	4.9001	10.1273	5.2271	4.4509	9.5377	5.0868	5.0503	10	4.9497	4.9999	9.504	4.5041	4.0743	9.0002	4.9259
2000Q1	6.6328	11.6001	4.9673	6.7582	9.7016	2.9434	5.662	8.1695	2.5075	5.2464	8.2937	3.0472	4.4001	7.6565	3.2564
2000Q2	6.4516	13.5711	7.1195	7.0401	9.7381	2.6979	5.4925	8.0323	2.5398	4.7452	7.0101	2.2649	4.2775	7.3635	3.086
2000Q3	9	14.1001	5.1001	7.6317	10.0738	2.4421	6.4259	9.5	3.0741	5.2631	8.5801	3.317	4.0959	8.3303	4.2345
2000Q4	7.4002	11.1006	3.7004	6.448	9.4999	3.0518	5.3001	7.9855	2.6854	5.5057	7.9989	2.4932	5.3557	7.8417	2.4861
2001Q1	0.1117	4.3666	4.255	0.8675	3.9432	3.0757	2.4777	6.5999	4.1222	4.5323	7.8998	3.3676	4.116	7.8999	3.7839
2001Q2	-3.4852	1.0721	4.5573	-1.3907	3.2507	4.6414	2.0369	5.6568	3.6199	1.3724	7.4838	6.1114	3.0478	8.0144	4.9666
2001Q3	-8.11	-3.3346	4.7754	-3.7466	2.5499	6.2964	0.05	6.1279	6.0779	1.9546	7.64	5.6853	2.8423	7.2237	4.3814
2001Q4	-17.2573	-11.8142	5.4431	-9.9158	-4.0522	5.8636	-3.8923	2.4104	6.3027	2.3019	7.3	4.9981	4.0129	8.2826	4.2697
2002Q1	-7.5918	-2.0999	5.4919	-3.2294	1.5999	4.8293	1.6001	5.7625	4.1624	4.0998	7.6793	3.5795	5.4473	8.5514	3.1041
2002Q2	-1.3301	3.2338	4.5639	2.2997	4.9	2.6003	4.2998	7.8975	3.5978	4.9532	9.9676	5.0144	5.0791	9.2899	4.2108
2002Q3	-0.8758	2.8692	3.7449	2.1999	4.2547	2.0548	3.3999	8.5016	5.1017	5.3277	9.2655	3.9378	4.9999	11.2996	6.2998
2002Q4	-0.6073	3.0094	3.6167	1.3	4.923	3.623	3.4185	6.8003	3.3818	5.9834	7.9931	2.0097	6.0134	9.0986	3.0852
2003Q1	0.6099	3.2159	2.606	2.7186	6.4316	3.7129	3.1999	8.2679	5.068	5.0881	9.4524	4.3643	5.0389	10.5	5.4611
2003Q2	0.9928	5.3572	4.3644	3.0886	7.3384	4.2498	4.2973	9.2085	4.9111	4.6504	10.1401	5.4897	5.0907	10.5255	5.4349
2003Q3	4.8174	7.982	3.1646	5.8478	8.8806	3.0328	5.4998	9.4134	3.9136	5.8786	10.0127	4.1341	5.9998	10.0818	4.0819
2003Q4	7.4001	10.9018	3.5017	6.6611	11.2458	4.5847	6.78	10.8045	4.0245	7.1	11.535	4.435	6.5	11.0861	4.5861
2004Q1	7.3634	11.7879	4.4245	8.2499	12.1469	3.897	7.4501	12.6801	5.23	7.6223	12.9652	5.343	6.4999	11.033	4.5331
2004Q2	7.6749	11.4999	3.8249	9.4001	12.5002	3.1001	8.2238	12.6301	4.4063	6.1997	11.1247	4.9251	7.3966	11.0248	3.6282
2004Q3	8.2432	11.2859	3.0427	7.7999	13.5986	5.7987	6.3458	10.7706	4.4248	6.7312	10.3997	3.6685	6.2002	9.2002	3
2004Q4	7.7598	12.2406	4.4808	6.6229	10.3266	3.7037	7.148	10.8351	3.6871	6.7302	10.2363	3.5061	6.0357	9.5259	3.4902
2005Q1	5.5534	9.8001	4.2467	7.4999	10.4227	2.9229	6.792	9.2756	2.4836	6.1999	8.8505	2.6506	5.6894	7.8933	2.2039
2005Q2	7.5001	10.9447	3.4446	7.1098	9.9607	2.8509	6.9857	10.3971	3.4115	5.9508	8.8244	2.8737	6.0999	8.5001	2.4002
2005Q3	8.2001	10.9907	2.7906	6.883	9.4194	2.5365	6.1949	9.1107	2.9157	6.9999	8.9707	1.9708	5.5002	8.4174	2.9172
2005Q4	5.4692	8.3999	2.9307	6.1356	10.1291	3.9935	6.3689	8.9086	2.5396	6.3	8.0002	1.7002	4.2998	7.5001	3.2003
2006Q1	7.1864	12.1769	4.9905	7.0378	9.3236	2.2857	6.273	9.4926	3.2196	5.4042	7.9551	2.5509	4.7504	7.0813	2.3309
2006Q2	7.4	9.33	1.93	6.1733	9.4872	3.3138	5.8498	8.4669	2.6171	4.7554	7.7309	2.9755	5	7.1	2.1
2006Q3	7.0559	11.6251	4.5691	5.4421	9.053	3.6109	5.049	7.616	2.567	4.6937	6.9617	2.268	4.847	7.2659	2.4189
2006Q4	6.5456	8.7	2.1544	5.493	8.1	2.607	4.7692	7.0736	2.3044	4.8851	6.5229	1.6378	4.6154	6.4017	1.7863
2007Q1	5	8.6302	3.6302	4.5293	7.3579	2.8286	4.7835	6.5215	1.738	4.429	6.6	2.171	3.9	6.9	3
2007Q2	3.1027	5.872	2.7693	3.1204	5.8277	2.7073	4.0987	6.1	2.0013	3.5473	5.6639	2.1166	4	5.4423	1.4423
2007Q3	2.8452	5.4	2.5548	3.3767	5.4327	2.056	3.5319	5.2813	1.7495	3.0033	5.345	2.3417	3.5	5.102	1.602
2007Q4	2.4821	5.4	2.9179	2.0151	5.0009	2.9858	2.5024	5.024	2.5216	3.1104	5.4564	2.346	3.1014	5.389	2.2877
2008Q1	-0.9733	3.4565	4.4298	0.0678	3.9	3.8322	0.3083	4.7632	4.4548	1.3952	5.6145	4.2193	1.5158	5.1471	3.6313
2008Q2	-3.2594	0.4006	3.66	-2.6601	2.9	5.5601	-0.7714	3.9965	4.7679	-1.43	3.3593	4.7894	1.36	4.5	3.14
2008Q3	-2.0696	1.7119	3.7815	-1.8677	2.3493	4.217	-2.7661	2.3	5.0661	-0.5249	3	3.5249	0.4438	3.5965	3.1527
2008Q4	-11.1714	-4.6556	6.5157	-11.2512	-4.3	6.9512	-8.3996	-2.55	5.8496	-5.3747	-1	4.3747	-1.8	2.2	4
2009Q1	-16.0727	-9.9281	6.1446	-14.605	-8.0389	6.566	-11.5256	-5	6.5256	-5.7706	-0.3	5.4706	-2.4474	3.5	5.9474
2009Q2	-19.6032	-13.8112	5.7921	-12.7459	-7.1311	5.6148	-8.0932	-1.4	6.6932	-3.7494	3.4573	7.2067	0.1077	4.66	4.5523
2009Q3	-10.2195	-4.442	5.7775	-6.6577	0	6.6577	-2.7573	2.4489	5.2063	0.2	4.5558	4.3558	2.5513	6.0287	3.4774
2009Q4	-5.3721	0.1951	5.5673	-1.8102	2.0185	3.8286	-0.0796	3.3999	3.4795	1.5118	5.9225	4.4107	3.1888	6.7346	3.5458
2010Q1	-0.636	3.3	3.936	0.7018	4.4555	3.7537	1.9265	6.9	4.9735	4.68	8.2	3.52	5.7265	7.704	1.9775
2010Q2	2.3245	6.5595	4.235	4.2899	7	2.7101	4.9462	8.128	3.1817	5.9012	9.089	3.1878	6.1223	8.6637	2.5414
2010Q3	6.2117	12.1027	5.891	6.0931	10.4	4.3069	5.3797	11.0519	5.6722	5.3	9.7717	4.4717	5.1606	10.7711	5.6105
2010Q4	5.5274	10.1029	4.5756	4.2001	10.3185	6.1184	5.2019	10.241	5.0391	5.1952	10.7556	5.5604	5.0095	10.4	5.3905
2011Q1	7.5127	11.2186	3.7059	7.9286	11.5749	3.6463	7.9556	11.3686	3.413	8.1877	12.256	4.0682	6.5597	9.8535	3.2938
2011Q2	7.3594	14.2513	6.8919	7.2494	11.4584	4.209	7.6	12.6	5	5.2255	10.2198	4.9943	6.1675	9.9884	3.8209
2011Q3	4.9486	9.6739	4.7253	5.3437	8.7236	3.3799	4.8099	8.4	3.5901	4.8937	8.3567	3.463	5.0214	8.4121	3.3907
2011Q4	5	9.4564	4.4564	2.8383	8.246	5.4077	4.0443	8.0448	4.0006	3.9099	8.4227	4.5127	4.6131	8.9657	4.3526
2012Q1	5.1734	10.428	5.2546	5	7.6351	2.6351	4.8	7.991	3.191	5.2602	8.6451	3.3849	4.4317	8.2338	3.802
2012Q2	5.6894	9.9166	4.2272	4.9771	8.6531	3.676	5.2289	8.7873	3.5583	4.6207	8.7364	4.1156	5.832	9.1945	3.3625
2012Q3	4.2839	8.1805	3.8966	3.8907	6.5042	2.6135	3.5159	6.6	3.0841	4.88	7.4	2.52	5.0023	8.5873	3.585
2012Q4	0.5009	5.9734	5.4725	1.9441	6.06	4.1159	4.2	7.6715	3.4715	5.5836	9.1324	3.5488	6.0618	8.594	2.5321
2013Q1	2.4375	4.9594	2.5219	4.1258	6.5465	2.4207	4.718	7.0486	2.3305	5.028	7.9434	2.9153	5.1	7.8194	2.7194
2013Q2	3.7666	6.5625	2.796	4.633	7.0806	2.4476	5.1	8.1138	3.0138	5.1	7.4486	2.3486	4.8868	7.4779	2.5911
2013Q3	4.3667	5.85	1.4833	4.5376	6.652	2.1145	3.7331	7.0858	3.3528	4.516	7.6759	3.1599	3.9625	7.4047	3.4422
2013Q4	4.0817	6.5249	2.4431	3.6	5.4	1.8	3.7	6.2377	2.5377	3.5462	6.2	2.6538	3.8461	6.1124	2.2664
2014Q1	3.9	6.0637	2.1637	4.3	6.8	2.5	4.6	6.5968	1.9968	4.4731	6.4312	1.9581	4.7786	6.7775	1.999
2014Q2	4.9602	7.236	2.2758	5.2564	6.6202	1.3638	4.7	6.6602	1.9602	4.6885	6.8092	2.1207	4.476	6.3239	1.8479
2014Q3	5.1367	7.2	2.0633	5.4095	7.0262	1.6166	4.9933	7.06	2.0667	4.633	6.6	1.967	4.5348	6.4492	1.9144
2014Q4	4.7864	6.4609	1.6745	4.9368	7.1271	2.1903	4.5167	6.6	2.0833	4.3662	6.6302	2.264	4.7977	6.7304	1.9327
2015Q1	3.6502	5.9142	2.264	3.9826	6.1339	2.1512	4.8	6.4	1.6	4.6	6.7	2.1	4.2	6.32	2.12
2015Q2	1.2674	5	3.7326	4.5412	7.2	2.6588	4.9538	6.8753	1.9215	4.3889	6.32	1.9311	3.9742	5.8725	1.8982
2015Q3	3.7983	5.9793	2.181	4.6024	6.3934	1.791	4.1339	6.0307	1.8968	4.3274	6.05	1.7225	4.3627	5.85	1.4873
2015Q4	2.4982	5.6363	3.1381	3.6257	5.3207	1.695	3.7516	5.5452	1.7936	3.8	6.0648	2.2648	3.5451	5.9133	2.3682
2016Q1	0.8024	4.2469	3.4445	2.8617	5.0531	2.1914	2.9205	5.0678	2.1473	2.973	5.2211	2.248	2.9885	4.7416	1.753
2016Q2	0.341	4.0984	3.7574	2.2449	4.4821	2.2372	2.621	4.4824	1.8614	3	5.0275	2.0275	2.8309	4.8	1.9691
2016Q3	0.4646	2.8422	2.3776	1.331	3.2024	1.8714	2.0964	3.4785	1.3821	2.4418	3.8804	1.4386	2.5	4.163	1.663
2016Q4	1.6125	3.6151	2.0026	2.516	3.8287	1.3127	2.6954	3.983	1.2876	2.8501	3.959	1.1089	2.6003	4.0549	1.4546
2017Q1	2.8898	4.3887	1.4989	2.9744	4.6243	1.6499	2.9648	4.4825	1.5178	2.8513	4.9318	2.0805	2.8115	5.3101	2.4986
2017Q2	3.6	5.7631	2.1631	3.1728	4.9671	1.7943	3.1043	5.0271	1.9228	3.3	5.4395	2.1395	3.3879	4.7743	1.3863
2017Q3	3.178	4.6506	1.4726	3	5.1961	2.1961	2.9242	5.2085	2.2843	2.9	5.0706	2.1706	2.9096	4.5835	1.6739
2017Q4	3.81	5.5326	1.7227	3.0073	5.2099	2.2026	3.1	4.9825	1.8825	2.9594	5.0035	2.0441	2.9296	4.5223	1.5927
2018Q1	3.7816	6.697	2.9154	4.3939	6.4481	2.0542	4.3091	6.3062	1.9971	3.8041	5.9187	2.1146	3.6872	6.2389	2.5517
2018Q2	4.6094	6.241	1.6315	5.0741	6.1846	1.1105	4.0874	5.8694	1.782	3.5553	5.6452	2.0898	3.3214	5.3221	2.0007
2018Q3	4.3	6.4653	2.1653	4.2364	5.5	1.2636	4.0098	5.5	1.4902	3.6646	5.5004	1.8359	3.3105	4.8626	1.5521
2018Q4	4.4804	6.8411	2.3607	3.6757	6.1571	2.4813	3.5713	5.4915	1.9203	3.0743	4.6885	1.6142	2.9467	4.6971	1.7504
2019Q1	3.3654	5.3047	1.9393	3.68	5.3812	1.7012	3.2334	4.7507	1.5173	2.8295	4.4453	1.6157	2.2867	4.4683	2.1816
2019Q2	3.0181	5.8952	2.8771	2.9933	5.2906	2.2974	2.6312	4.7484	2.1172	2.4998	4.1648	1.665	2.2641	4.4	2.1359
2019Q3	1.2661	3.6181	2.352	1.5593	3.2729	1.7137	1.2217	4.1274	2.9057	1.6317	3.6541	2.0224	1.5904	3.1829	1.5925
2019Q4	0.6312	3.4356	2.8044	0.5994	4.2308	3.6314	0.7873	3.0617	2.2745	1.1297	3.2386	2.1089	1.5973	4.0604	2.4631
2020Q1	-0.5334	2.5204	3.0538	0.968	2.6579	1.6899	1.4056	3.229	1.8234	1.9718	4.0805	2.1087	2.2	4.6	2.4
2020Q2	-50	-25.1896	24.8104	-16.9784	12.31	29.2884	-3.4337	9.1323	12.566	1.4991	10.0162	8.5171	3	9.8304	6.8304
2020Q3	-7.1307	8.7163	15.847	-0.382	7.7039	8.0859	1.1651	6.3515	5.1864	1.8521	6.7463	4.8942	2.7237	5.8416	3.1179
2020Q4	2.028	8.1974	6.1694	1.9508	6.1912	4.2404	2.0603	5.1141	3.0538	2.0248	6.1769	4.1521	3.1115	6.1613	3.0498
2021Q1	4.0659	9.7991	5.7331	3.8875	7.221	3.3335	4.5502	8.4	3.8498	4.2	7.4981	3.2981	4.4784	6.9754	2.4969
2021Q2	7.2913	10.5	3.2087	5	9.8666	4.8666	4.6052	8.8577	4.2525	4.8435	7.0431	2.1996	4	6.4	2.4
2021Q3	6.6276	9.7818	3.1542	4.8842	8.5536	3.6694	4.5745	8.2361	3.6616	4.0302	6.6246	2.5944	4.0801	6.0943	2.0142
2021Q4	5.6715	9.6781	4.0067	4.3	7.7812	3.4812	4.3487	6.7736	2.4248	4.213	6.5943	2.3813	3.6775	6.0988	2.4213

## Sheet: RRESINV
Measures of Cross-Sectional Dispersion for Quarterly Forecasts for REAL RESIDENTIAL FIXED INVESTMENT (RRESINV)
Units: Annualized Percentage Points
Dispersion Measure D2 = 75th Percentile Minus 25th Percentile of the Forecasts for Q/Q Growth
P25 = 25th Percentile of the Forecasts for Q/Q Growth
P75 = 75th Percentile of the Forecasts for Q/Q Growth
At Each Survey Date T, the Quarterly Horizons Are T, T+1, T+2, T+3, and T+4
Survey_Date(T)	RRESINV_P25_D2(T)	RRESINV_P75_D2(T)	RRESINV_D2(T)	RRESINV_P25_D2(T+1)	RRESINV_P75_D2(T+1)	RRESINV_D2(T+1)	RRESINV_P25_D2(T+2)	RRESINV_P75_D2(T+2)	RRESINV_D2(T+2)	RRESINV_P25_D2(T+3)	RRESINV_P75_D2(T+3)	RRESINV_D2(T+3)	RRESINV_P25_D2(T+4)	RRESINV_P75_D2(T+4)	RRESINV_D2(T+4)
1968Q4	#N/A	#N/A	#N/A	#N/A	#N/A	#N/A	#N/A	#N/A	#N/A	#N/A	#N/A	#N/A	#N/A	#N/A	#N/A
1969Q1	#N/A	#N/A	#N/A	#N/A	#N/A	#N/A	#N/A	#N/A	#N/A	#N/A	#N/A	#N/A	#N/A	#N/A	#N/A
1969Q2	#N/A	#N/A	#N/A	#N/A	#N/A	#N/A	#N/A	#N/A	#N/A	#N/A	#N/A	#N/A	#N/A	#N/A	#N/A
1969Q3	#N/A	#N/A	#N/A	#N/A	#N/A	#N/A	#N/A	#N/A	#N/A	#N/A	#N/A	#N/A	#N/A	#N/A	#N/A
1969Q4	#N/A	#N/A	#N/A	#N/A	#N/A	#N/A	#N/A	#N/A	#N/A	#N/A	#N/A	#N/A	#N/A	#N/A	#N/A
1970Q1	#N/A	#N/A	#N/A	#N/A	#N/A	#N/A	#N/A	#N/A	#N/A	#N/A	#N/A	#N/A	#N/A	#N/A	#N/A
1970Q2	#N/A	#N/A	#N/A	#N/A	#N/A	#N/A	#N/A	#N/A	#N/A	#N/A	#N/A	#N/A	#N/A	#N/A	#N/A
1970Q3	#N/A	#N/A	#N/A	#N/A	#N/A	#N/A	#N/A	#N/A	#N/A	#N/A	#N/A	#N/A	#N/A	#N/A	#N/A
1970Q4	#N/A	#N/A	#N/A	#N/A	#N/A	#N/A	#N/A	#N/A	#N/A	#N/A	#N/A	#N/A	#N/A	#N/A	#N/A
1971Q1	#N/A	#N/A	#N/A	#N/A	#N/A	#N/A	#N/A	#N/A	#N/A	#N/A	#N/A	#N/A	#N/A	#N/A	#N/A
1971Q2	#N/A	#N/A	#N/A	#N/A	#N/A	#N/A	#N/A	#N/A	#N/A	#N/A	#N/A	#N/A	#N/A	#N/A	#N/A
1971Q3	#N/A	#N/A	#N/A	#N/A	#N/A	#N/A	#N/A	#N/A	#N/A	#N/A	#N/A	#N/A	#N/A	#N/A	#N/A
1971Q4	#N/A	#N/A	#N/A	#N/A	#N/A	#N/A	#N/A	#N/A	#N/A	#N/A	#N/A	#N/A	#N/A	#N/A	#N/A
1972Q1	#N/A	#N/A	#N/A	#N/A	#N/A	#N/A	#N/A	#N/A	#N/A	#N/A	#N/A	#N/A	#N/A	#N/A	#N/A
1972Q2	#N/A	#N/A	#N/A	#N/A	#N/A	#N/A	#N/A	#N/A	#N/A	#N/A	#N/A	#N/A	#N/A	#N/A	#N/A
1972Q3	#N/A	#N/A	#N/A	#N/A	#N/A	#N/A	#N/A	#N/A	#N/A	#N/A	#N/A	#N/A	#N/A	#N/A	#N/A
1972Q4	#N/A	#N/A	#N/A	#N/A	#N/A	#N/A	#N/A	#N/A	#N/A	#N/A	#N/A	#N/A	#N/A	#N/A	#N/A
1973Q1	#N/A	#N/A	#N/A	#N/A	#N/A	#N/A	#N/A	#N/A	#N/A	#N/A	#N/A	#N/A	#N/A	#N/A	#N/A
1973Q2	#N/A	#N/A	#N/A	#N/A	#N/A	#N/A	#N/A	#N/A	#N/A	#N/A	#N/A	#N/A	#N/A	#N/A	#N/A
1973Q3	#N/A	#N/A	#N/A	#N/A	#N/A	#N/A	#N/A	#N/A	#N/A	#N/A	#N/A	#N/A	#N/A	#N/A	#N/A
1973Q4	#N/A	#N/A	#N/A	#N/A	#N/A	#N/A	#N/A	#N/A	#N/A	#N/A	#N/A	#N/A	#N/A	#N/A	#N/A
1974Q1	#N/A	#N/A	#N/A	#N/A	#N/A	#N/A	#N/A	#N/A	#N/A	#N/A	#N/A	#N/A	#N/A	#N/A	#N/A
1974Q2	#N/A	#N/A	#N/A	#N/A	#N/A	#N/A	#N/A	#N/A	#N/A	#N/A	#N/A	#N/A	#N/A	#N/A	#N/A
1974Q3	#N/A	#N/A	#N/A	#N/A	#N/A	#N/A	#N/A	#N/A	#N/A	#N/A	#N/A	#N/A	#N/A	#N/A	#N/A
1974Q4	#N/A	#N/A	#N/A	#N/A	#N/A	#N/A	#N/A	#N/A	#N/A	#N/A	#N/A	#N/A	#N/A	#N/A	#N/A
1975Q1	#N/A	#N/A	#N/A	#N/A	#N/A	#N/A	#N/A	#N/A	#N/A	#N/A	#N/A	#N/A	#N/A	#N/A	#N/A
1975Q2	#N/A	#N/A	#N/A	#N/A	#N/A	#N/A	#N/A	#N/A	#N/A	#N/A	#N/A	#N/A	#N/A	#N/A	#N/A
1975Q3	#N/A	#N/A	#N/A	#N/A	#N/A	#N/A	#N/A	#N/A	#N/A	#N/A	#N/A	#N/A	#N/A	#N/A	#N/A
1975Q4	#N/A	#N/A	#N/A	#N/A	#N/A	#N/A	#N/A	#N/A	#N/A	#N/A	#N/A	#N/A	#N/A	#N/A	#N/A
1976Q1	#N/A	#N/A	#N/A	#N/A	#N/A	#N/A	#N/A	#N/A	#N/A	#N/A	#N/A	#N/A	#N/A	#N/A	#N/A
1976Q2	#N/A	#N/A	#N/A	#N/A	#N/A	#N/A	#N/A	#N/A	#N/A	#N/A	#N/A	#N/A	#N/A	#N/A	#N/A
1976Q3	#N/A	#N/A	#N/A	#N/A	#N/A	#N/A	#N/A	#N/A	#N/A	#N/A	#N/A	#N/A	#N/A	#N/A	#N/A
1976Q4	#N/A	#N/A	#N/A	#N/A	#N/A	#N/A	#N/A	#N/A	#N/A	#N/A	#N/A	#N/A	#N/A	#N/A	#N/A
1977Q1	#N/A	#N/A	#N/A	#N/A	#N/A	#N/A	#N/A	#N/A	#N/A	#N/A	#N/A	#N/A	#N/A	#N/A	#N/A
1977Q2	#N/A	#N/A	#N/A	#N/A	#N/A	#N/A	#N/A	#N/A	#N/A	#N/A	#N/A	#N/A	#N/A	#N/A	#N/A
1977Q3	#N/A	#N/A	#N/A	#N/A	#N/A	#N/A	#N/A	#N/A	#N/A	#N/A	#N/A	#N/A	#N/A	#N/A	#N/A
1977Q4	#N/A	#N/A	#N/A	#N/A	#N/A	#N/A	#N/A	#N/A	#N/A	#N/A	#N/A	#N/A	#N/A	#N/A	#N/A
1978Q1	#N/A	#N/A	#N/A	#N/A	#N/A	#N/A	#N/A	#N/A	#N/A	#N/A	#N/A	#N/A	#N/A	#N/A	#N/A
1978Q2	#N/A	#N/A	#N/A	#N/A	#N/A	#N/A	#N/A	#N/A	#N/A	#N/A	#N/A	#N/A	#N/A	#N/A	#N/A
1978Q3	#N/A	#N/A	#N/A	#N/A	#N/A	#N/A	#N/A	#N/A	#N/A	#N/A	#N/A	#N/A	#N/A	#N/A	#N/A
1978Q4	#N/A	#N/A	#N/A	#N/A	#N/A	#N/A	#N/A	#N/A	#N/A	#N/A	#N/A	#N/A	#N/A	#N/A	#N/A
1979Q1	#N/A	#N/A	#N/A	#N/A	#N/A	#N/A	#N/A	#N/A	#N/A	#N/A	#N/A	#N/A	#N/A	#N/A	#N/A
1979Q2	#N/A	#N/A	#N/A	#N/A	#N/A	#N/A	#N/A	#N/A	#N/A	#N/A	#N/A	#N/A	#N/A	#N/A	#N/A
1979Q3	#N/A	#N/A	#N/A	#N/A	#N/A	#N/A	#N/A	#N/A	#N/A	#N/A	#N/A	#N/A	#N/A	#N/A	#N/A
1979Q4	#N/A	#N/A	#N/A	#N/A	#N/A	#N/A	#N/A	#N/A	#N/A	#N/A	#N/A	#N/A	#N/A	#N/A	#N/A
1980Q1	#N/A	#N/A	#N/A	#N/A	#N/A	#N/A	#N/A	#N/A	#N/A	#N/A	#N/A	#N/A	#N/A	#N/A	#N/A
1980Q2	#N/A	#N/A	#N/A	#N/A	#N/A	#N/A	#N/A	#N/A	#N/A	#N/A	#N/A	#N/A	#N/A	#N/A	#N/A
1980Q3	#N/A	#N/A	#N/A	#N/A	#N/A	#N/A	#N/A	#N/A	#N/A	#N/A	#N/A	#N/A	#N/A	#N/A	#N/A
1980Q4	#N/A	#N/A	#N/A	#N/A	#N/A	#N/A	#N/A	#N/A	#N/A	#N/A	#N/A	#N/A	#N/A	#N/A	#N/A
1981Q1	#N/A	#N/A	#N/A	#N/A	#N/A	#N/A	#N/A	#N/A	#N/A	#N/A	#N/A	#N/A	#N/A	#N/A	#N/A
1981Q2	#N/A	#N/A	#N/A	#N/A	#N/A	#N/A	#N/A	#N/A	#N/A	#N/A	#N/A	#N/A	#N/A	#N/A	#N/A
1981Q3	-23.3928	-15.6536	7.7391	-16.2896	0	16.2896	13.8035	28.5206	14.7172	16.8096	29.3775	12.5679	11.6841	27.0302	15.3461
1981Q4	-26.8353	-9.9229	16.9125	-9.4049	10.5195	19.9244	9.6375	34.5331	24.8956	21.2688	46.2533	24.9846	14.0041	45.1506	31.1465
1982Q1	-14.7874	0	14.7874	5.5775	32.6402	27.0628	20.4519	43.8912	23.4393	18.5588	31.0453	12.4866	9.6319	28.413	18.7811
1982Q2	-9.8686	18.972	28.8407	10.6577	34.5051	23.8474	10.6577	33.7815	23.1238	8.9833	21.5506	12.5673	8.7861	19.9434	11.1572
1982Q3	3.0416	26.3194	23.2777	10.1189	20.4519	10.333	5.9834	19.4595	13.4761	8.7861	20.4519	11.6657	9.4055	27.6951	18.2896
1982Q4	5.0305	32.6402	27.6098	7.3365	32.6402	25.3038	9.5174	28.0821	18.5648	9.8694	26.8321	16.9627	7.9171	23.1015	15.1844
1983Q1	14.8828	53.4909	38.6081	18.1389	29.4538	11.3149	16.6334	28.413	11.7796	8.4166	18.0417	9.6251	8.0768	16.6334	8.5565
1983Q2	16.9859	36.0489	19.063	15.6584	24.6375	8.9791	7.2044	16.716	9.5116	7.3365	15.9704	8.634	7.2044	20.8055	13.6011
1983Q3	18.0978	29.4137	11.3159	-3.5552	7.7635	11.3187	-7.2042	7.4735	14.6777	0	12.0173	12.0173	6.954	18.6624	11.7084
1983Q4	-2.0923	7.2044	9.2967	-6.7202	7.2044	13.9246	0	7.3365	7.3365	0	14.5231	14.5231	0	7.077	7.077
1984Q1	0	8.0768	8.0768	0	7.3365	7.3365	0	7.077	7.077	-6.5018	6.954	13.4558	-7.0304	9.2091	16.2395
1984Q2	0	16.324	16.324	-8.9114	6.7204	15.6318	-12.4837	1.3201	13.8039	-6.9538	0	6.9538	-6.6092	6.1997	12.809
1984Q3	-6.5018	6.6094	13.1112	-13.0959	-6.2972	6.7987	-13.3135	-3.137	10.1765	-13.7711	1.995	15.7661	-6.835	5.359	12.194
1984Q4	-10.4556	2.9774	13.433	-6.5018	6.6094	13.1112	-5.0304	6.8352	11.8656	-6.6092	6.6094	13.2186	-9.5546	1.9184	11.473
1985Q1	-6.5018	4.0742	10.576	2.7071	13.774	11.0668	3.3192	13.5411	10.2219	-3.1618	6.6094	9.7712	-6.0537	5.628	11.6818
1985Q2	6.9419	19.4595	12.5176	5.4225	13.774	8.3514	0	6.954	6.954	-1.9184	1.9752	3.8937	-6.5018	0	6.5018
1985Q3	4.0062	6.7204	2.7142	0	9.8694	9.8694	0	6.6094	6.6094	-6.1292	6.1524	12.2817	-6.1996	2.9518	9.1515
1985Q4	-1.5809	4.8703	6.4512	0	6.502	6.502	0	6.502	6.502	0	6.45	6.45	-0.3127	6.4534	6.7661
1986Q1	2.2856	7.3383	5.0527	4.5319	9.3235	4.7916	3.3179	10.4464	7.1285	0	8.837	8.837	-6.0951	4.0196	10.1147
1986Q2	6.8352	14.1803	7.3451	4.4686	11.3207	6.8521	2.046	8.4166	6.3706	-2.1107	4.3709	6.4817	-2.2592	2.1798	4.439
1986Q3	2.8415	8.5515	5.71	0	6.2319	6.2319	0	4.8804	4.8804	-2.0619	6.3448	8.4067	-4.5452	0.5967	5.1419
1986Q4	-7.7209	2.0565	9.7774	-2.1107	2.0565	4.1672	-2.015	2.046	4.061	-2.1219	2.0565	4.1784	-3.9796	2.1333	6.1129
1987Q1	-5.9243	1.4123	7.3366	-1.7738	4.4038	6.1775	0	4.1661	4.1661	-2.0356	3.6195	5.6551	-2.5373	1.995	4.5323
1987Q2	0	6.2645	6.2645	-3.9599	3.2551	7.215	-4.102	1.0425	5.1445	-7.2222	0	7.2222	-4.1942	1.9851	6.1792
1987Q3	-3.9796	2.046	6.0256	-4.0196	2.0356	6.0551	-4.0604	2.0565	6.1169	-6.1678	2.046	8.2137	-3.3123	2.0565	5.3688
1987Q4	-7.9958	-1.4159	6.5799	-6.1362	0	6.1362	-4.1232	0	4.1232	-4.1596	4.102	8.2616	0	6.3875	6.3875
1988Q1	-11.694	-2.0253	9.6688	-4.4076	0	4.4076	-6.0133	5.9877	12.001	-0.6226	4.1879	4.8105	-4.0604	4.4438	8.5042
1988Q2	-1.8599	5.9558	7.8158	-2.0725	4.0371	6.1096	-6.081	0.507	6.5879	-4.1024	0	4.1024	-6.184	1.358	7.5421
1988Q3	-2.9029	2.1219	5.0248	-4.2099	0	4.2099	-4.1661	0	4.1661	-4.2322	2.0887	6.3209	-4.2774	2.0671	6.3446
1988Q4	-0.4199	2.1219	2.5419	-1.6632	2.7374	4.4006	-4.2099	0	4.2099	-3.7594	0	3.7594	-4.0399	2.1447	6.1846
1989Q1	-0.8081	6.2319	7.04	-3.9995	1.9752	5.9747	-5.8663	0	5.8663	-4.0095	2.0887	6.0982	-2.4451	2.046	4.4911
1989Q2	-7.3009	2.4851	9.786	-4.9272	2.1108	7.0379	-4.6537	3.272	7.9257	-2.0491	4.1879	6.237	-2.0565	6.624	8.6805
1989Q3	-4.1661	3.0025	7.1686	0	4.2322	4.2322	-2.0997	6.683	8.7826	0	6.5732	6.5732	0	8.329	8.329
1989Q4	-2.1219	2.1679	4.2899	-2.0887	4.3472	6.4359	2.1333	8.7382	6.6049	2.0997	8.5515	6.4518	2.1107	8.5974	6.4866
1990Q1	0	4.3709	4.3709	2.1563	6.6094	4.4531	2.1333	6.646	4.5127	1.839	4.3237	2.4847	2.1107	4.5191	2.4083
1990Q2	-2.1107	3.2109	5.3216	-6.2643	1.9205	8.1848	-4.2774	2.1253	6.4028	0	4.3005	4.3005	2.1041	4.5045	2.4004
1990Q3	-12.5489	-3.4779	9.071	-5.994	0	5.994	-2.3054	2.1917	4.4971	2.1798	7.9494	5.7697	2.2798	8.1712	5.8914
1990Q4	-17.1609	-7.32	9.8409	-11.8795	-2.3323	9.5472	-4.6235	2.5235	7.147	1.8604	7.3365	5.4761	2.4315	12.294	9.8625
1991Q1	-15.8302	-10.1942	5.6361	-7.2917	0	7.2917	1.2551	7.9696	6.7145	3.4997	12.6834	9.1837	5.0305	10.3144	5.2839
1991Q2	-10.1824	-0.5281	9.6543	2.6935	10.9492	8.2557	5.2277	17.7376	12.5099	4.9407	13.7267	8.786	5.262	15.0694	9.8074
1991Q3	4.7832	10.9492	6.1659	5.1937	16.9971	11.8034	4.9648	13.0982	8.1335	5.399	14.5137	9.1147	5.0623	10.1832	5.1209
1991Q4	0.7535	9.863	9.1094	2.0087	7.3816	5.3729	5.516	10.407	4.891	4.7477	12.1448	7.3971	5.2122	11.3482	6.136
1992Q1	4.5005	10.001	5.5005	5.383	12.739	7.356	6.6006	13.0272	6.4266	5.4528	13.1053	7.6525	3.2574	10.1244	6.867
1992Q2	5.4115	15.4657	10.0541	4.9413	11.0478	6.1065	5.1978	10.8908	5.693	4.3282	10.1135	5.7854	4.2472	9.6319	5.3847
1992Q3	2.2005	6.901	4.7005	4.1998	11.032	6.8322	5.0358	10.0396	5.0038	4.1004	10.3437	6.2434	4.1445	9.5807	5.4361
1992Q4	4.4615	12.9121	8.4507	4.5994	11.9596	7.3602	4.9999	10.5001	5.5002	4.8975	10.1289	5.2314	3.9995	8.6386	4.6391
1993Q1	3.3005	14.8905	11.59	4.8999	11.4513	6.5515	3.9992	9.0362	5.0371	4.1384	8.4048	4.2664	2.9995	6.6001	3.6006
1993Q2	5.1192	15.4469	10.3277	5.8272	12.9492	7.122	5.1238	13.0754	7.9515	3.902	8.2003	4.2983	3.1003	6.4998	3.3995
1993Q3	6.2	12.022	5.822	5.0508	13.8	8.7492	3.9211	10.068	6.1469	3.536	8	4.464	3.5652	6	2.4348
1993Q4	7.3935	12.0633	4.6697	3.8091	10.0602	6.2511	3.3392	7.4875	4.1482	3.4851	7.303	3.8179	2.9102	5.5414	2.6312
1994Q1	5.0215	12.3279	7.3064	5.2574	10.442	5.1845	3.2005	7.6788	4.4783	0.6803	3.5552	2.8749	-0.3005	3.3064	3.6069
1994Q2	2.9608	12.4004	9.4395	2.0583	8.1009	6.0427	-1.713	3.8995	5.6125	-2.5436	3.3055	5.8491	-2.5321	3.1803	5.7124
1994Q3	1.9005	7.3816	5.4811	-2.5005	3.4004	5.9009	-5.0751	2.5493	7.6244	-2.7544	3.347	6.1014	-1.0067	2.7002	3.7069
1994Q4	-1.4518	6.0589	7.5107	-4.9154	1.4788	6.3942	-4.7771	0.0849	4.862	-2.9003	0.1002	3.0005	-2.845	1.3691	4.2142
1995Q1	-2.6002	2.4712	5.0714	-3.8644	0.1741	4.0385	-5.6996	-0.1499	5.5496	-6.1103	0.2657	6.3759	-6.0164	1.0163	7.0328
1995Q2	-9.4845	-1.9002	7.5843	-4.5969	1.7897	6.3866	-0.9172	3.4931	4.4103	-2.9155	2.7006	5.6161	-3.5395	2.9342	6.4737
1995Q3	-5.1487	0.1993	5.3481	1.6412	6.5007	4.8595	0	7.2444	7.2444	0	4.8493	4.8493	0	2.7922	2.7922
1995Q4	5.0132	10.1244	5.1112	1.8793	5.3987	3.5194	-0.571	4.7354	5.3063	-1.7357	4.6777	6.4134	-2.3111	2.7292	5.0403
1996Q1	-0.3013	3.7479	4.0492	0.3033	5.0507	4.7474	0	4.4937	4.4937	-1.8992	3.0036	4.9028	-1.0472	2.9309	3.978
1996Q2	0.7502	4.9924	4.2422	-3.3225	2.235	5.5575	-5.7216	0.5494	6.271	-2.5534	1.3497	3.9031	-2.4067	2.2411	4.6478
1996Q3	-1.2759	4.6369	5.9128	-4.4992	1.4209	5.9202	-4.403	0	4.403	-3.0147	0.1971	3.2117	-4.1879	2.0187	6.2066
1996Q4	-1.8614	1.0136	2.875	-2.857	1.1004	3.9573	-2.9993	1.4994	4.4987	-2.9345	1.4625	4.397	-2.8672	1.9746	4.8417
1997Q1	-2.7166	0.7242	3.4408	-1.4373	2.4596	3.8969	-1.7004	2.6993	4.3997	-1.9007	2.2759	4.1766	-1.6995	1.4414	3.1409
1997Q2	0.9998	4.056	3.0562	-3.3669	2.9997	6.3666	-2.7776	2.3947	5.1723	-2.8068	2.499	5.3058	-2.0551	2.3004	4.3555
1997Q3	-0.648	4.999	5.647	-1.292	4.4541	5.7461	-0.466	4.006	4.472	-1.3562	2.4626	3.8188	-1.3961	2.0671	3.4633
1997Q4	2.449	5.5361	3.087	-0.1425	3.8823	4.0248	-1.4995	2.3001	3.7995	-2.1014	2.263	4.3644	-1.1602	1.4209	2.5812
1998Q1	1.0296	8.3865	7.3569	-0.408	4.7469	5.1549	-1.374	4.3504	5.7244	-1.4472	3.8401	5.2874	-2.4815	2.7002	5.1817
1998Q2	2.6053	9.8126	7.2073	-1.2947	4.9088	6.2035	-3.2498	2.8814	6.1312	-4.102	1.3093	5.4113	-2.5722	2.5235	5.0957
1998Q3	0.6995	7.0652	6.3657	-4.4671	4.0764	8.5436	-4.9998	2.908	7.9078	-6.0569	2.1714	8.2283	-3.9579	2.0317	5.9896
1998Q4	-1.0073	5.9841	6.9914	-5.7565	2.345	8.1015	-5.2977	1.6438	6.9415	-3.5227	2.2503	5.773	-4.8386	2.2102	7.0488
1999Q1	2.432	9.226	6.794	-3.4295	4.9534	8.3829	-4.5937	3.007	7.6006	-4.5819	1.8191	6.401	-2.4999	3.0178	5.5177
1999Q2	-0.0595	7.6503	7.7098	-4.9022	3.515	8.4172	-3.6755	1.0417	4.7171	-4.8924	1.1023	5.9948	-3.441	1.3145	4.7555
1999Q3	-5.6396	2.6132	8.2528	-7.2624	1.4259	8.6883	-7.9999	1.3016	9.3015	-6.5069	1.5809	8.0877	-5.0001	2.4068	7.4069
1999Q4	-5.9786	0.6455	6.6241	-5.3679	1.0758	6.4437	-5.8658	1.3965	7.2623	-4.1341	2.1447	6.2788	-2.977	1.4889	4.466
2000Q1	-3.8989	2.1563	6.0551	-5.5379	0	5.5379	-6.3471	0.435	6.7822	-6.2996	1.9742	8.2737	-4.8343	2.1091	6.9433
2000Q2	-4.0002	2.8996	6.8998	-6.8701	1.9001	8.7701	-5.8897	1.0624	6.9521	-5.1735	2.006	7.1795	-5.325	1.8942	7.2192
2000Q3	-6.9574	-0.4005	6.5569	-6.248	0.2191	6.4671	-5.5619	0	5.5619	-5.3006	0	5.3006	-1.9001	1.766	3.666
2000Q4	-4.9639	2.2598	7.2237	-3.1955	1.8776	5.0731	-2.3047	2.0005	4.3052	-0.7007	3.2739	3.9747	0	3.8355	3.8355
2001Q1	-2.5312	2.0151	4.5462	-2.8847	2.5996	5.4843	0.9976	4.5925	3.5948	1.75	5.368	3.618	1.5008	5.2969	3.7961
2001Q2	-1.3198	4.495	5.8147	-1.9845	2.3401	4.3246	-1.8797	5.4558	7.3355	0.1102	5.0168	4.9065	0.3309	4.9546	4.6237
2001Q3	0	2.6068	2.6068	-2.5359	3.1828	5.7187	-1.3166	3.1683	4.4849	-1.9326	3.3781	5.3107	0	2.8944	2.8944
2001Q4	-10.3116	-4.0423	6.2693	-9.4753	1.3857	10.861	-4.1089	4.3021	8.411	0.0998	7.4821	7.3823	0	7.6365	7.6365
2002Q1	-4.0005	2.0465	6.0471	-3.1995	2.4687	5.6682	-0.9755	3.2126	4.1881	0.4996	3.7555	3.2559	0.8148	4.9305	4.1158
2002Q2	-2.7406	5.0147	7.7553	-2.4863	2.0779	4.5641	-2.4665	2.0613	4.5277	0	2.1842	2.1842	0.4122	3.1023	2.6902
2002Q3	-1.1286	3.0218	4.1504	-1.2397	2.2	3.4397	-0.1045	2.8003	2.9048	-0.4997	3.4998	3.9995	-0.2993	2.9573	3.2566
2002Q4	-0.2074	3.4693	3.6767	-1.8619	2.0958	3.9577	-1.6727	2.0789	3.7517	0	2.6747	2.6747	0.9166	3.0965	2.1799
2003Q1	0.8155	4.968	4.1525	-3.104	2.5506	5.6546	-2.3311	2.0897	4.4208	-2.2004	2.8996	5.0999	-0.9938	2.9104	3.9042
2003Q2	-2.0197	3.5912	5.6109	-4.0245	2.3707	6.3952	-3.2997	2.7368	6.0365	-2.5116	2.8504	5.362	-1.6899	3.7503	5.4403
2003Q3	-0.2913	3.7453	4.0366	-2.4098	3.2331	5.6429	-2.9089	2.0218	4.9307	-2.7793	2.0117	4.7909	-1.9093	2.1578	4.0671
2003Q4	2	8.0152	6.0152	-3.7	4.1068	7.8068	-5.0035	2.3907	7.3942	-4.6235	2.1761	6.7996	-2.58	2.4002	4.9802
2004Q1	1.8638	7.9999	6.136	-4.876	4.6502	9.5262	-6.6074	2.0488	8.6562	-5.0549	2.3225	7.3774	-5.0759	1.5002	6.5761
2004Q2	0	4.925	4.925	-4.9206	1.4999	6.4205	-4.7693	1.8707	6.64	-3.7602	1.4588	5.219	-2.5405	2.2181	4.7586
2004Q3	-1.3722	4.4729	5.8451	-2.8	2.8775	5.6775	-3.7199	1.832	5.5518	-2.3227	2.8367	5.1594	-2.096	2.8118	4.9078
2004Q4	-1.2763	4.3146	5.5909	-3.2861	1.5505	4.8366	-3.0702	2.0495	5.1197	-2.8842	2.0446	4.9289	-4.0273	1.7754	5.8027
2005Q1	-0.6342	2.4218	3.056	-2.4999	1.4159	3.9158	-4.1846	1.1964	5.381	-4.1998	1.674	5.8738	-2.1278	1.3996	3.5274
2005Q2	0.9999	4.6743	3.6744	-2.1752	2.1919	4.3671	-3.4995	1.2327	4.7322	-4.5206	1.3675	5.8881	-6.5373	1.8119	8.3492
2005Q3	-0.0769	4.4891	4.566	-1.987	2.6844	4.6714	-4.519	1.9997	6.5188	-6.0002	1.8281	7.8283	-5.0004	1.5732	6.5737
2005Q4	0.7542	4.2672	3.513	-4.4095	2	6.4095	-6.5003	2.6445	9.1447	-4.9557	1.9996	6.9553	-4.9877	1.0135	6.0011
2006Q1	-4.11	1.9999	6.1099	-6.3775	1.5	7.8775	-5.8473	1.2055	7.0528	-5.8663	0.6014	6.4678	-4.1195	0	4.1195
2006Q2	-4.2652	1	5.2652	-10	-2	8	-11.0895	-1.9401	9.1494	-6	-0.4672	5.5328	-5.7553	1.0281	6.7834
2006Q3	-10.0494	-2.5391	7.5102	-10.9476	-1.5	9.4476	-6.7771	-1.2384	5.5388	-6.7	0.2504	6.9504	-5.9786	1.1483	7.1269
2006Q4	-15.0482	-8.7013	6.3469	-11.119	-4.1	7.019	-6	0	6	-5	1.0709	6.0709	-2.398	2.5	4.898
2007Q1	-15	-7	8	-7	-2.7753	4.2247	-3.4753	1.2054	4.6807	0	3	3	1.1335	5.0809	3.9475
2007Q2	-12.9826	-7.3224	5.6602	-8.2728	-1.581	6.6919	-5.3107	1.6	6.9107	0	3.3632	3.3632	0.7835	4.1044	3.3208
2007Q3	-11.2034	-7.5	3.7034	-8.2679	-2.9664	5.3015	-5	0	5	-1.7057	3.8	5.5057	0	5	5
2007Q4	-22	-15	7	-15.4757	-8.5785	6.8972	-10	-3.1618	6.8382	-5.279	1.6771	6.9561	-1.99	3.8545	5.8445
2008Q1	-26.2385	-15	11.2385	-18	-8.3657	9.6343	-10	-0.9963	9.0037	-5	3.2	8.2	-1.0457	8.9426	9.9883
2008Q2	-25	-16.4307	8.5693	-15.0277	-5	10.0277	-9.3302	0	9.3302	-2.1691	6.5682	8.7372	0.635	8.4556	7.8206
2008Q3	-17.9794	-10.1074	7.872	-12.3391	-4.8571	7.482	-6.4129	1.369	7.7819	-2.3183	5.8241	8.1424	0.4503	8.5019	8.0516
2008Q4	-23.4046	-15.3301	8.0745	-17.5595	-5.9	11.6595	-10	0	10	-3.649	6.0639	9.7128	0	12.7	12.7
2009Q1	-32	-17.051	14.949	-18.3235	-9.7604	8.5632	-10.0958	0.0213	10.1171	0	10	10	2.5235	17.696	15.1725
2009Q2	-27.9392	-16.3874	11.5518	-15.1939	-2.3986	12.7953	-0.9772	6.9972	7.9744	2.0151	16.8	14.7849	4	23.5977	19.5977
2009Q3	-12	1.9104	13.9104	-2.3944	7.0555	9.4498	1.3921	16.2819	14.8898	3.5	18.7474	15.2474	5.0056	16.6498	11.6442
2009Q4	3.461	15	11.539	3	15	12	3.5462	15.8522	12.306	4.0604	16.0289	11.9685	5.596	16.1614	10.5653
2010Q1	-1.6892	6.7468	8.436	4.6223	15	10.3777	5.5312	15	9.4688	6.1364	16.0289	9.8926	6.2498	21.1294	14.8795
2010Q2	3.0339	12.5	9.4661	3.404	11.1706	7.7667	5	15	10	5.441	20.08	14.6391	5.184	20	14.816
2010Q3	-10	4.5	14.5	4.7051	10	5.2949	5	14.7	9.7	5	15	10	5.0783	15.5	10.4217
2010Q4	-4.0227	5.5368	9.5595	3.2156	9.2017	5.9861	4.3621	15	10.6379	4.4687	16.1015	11.6328	5	20.0899	15.0899
2011Q1	-1.0187	8.216	9.2347	3.0964	14.0491	10.9527	4.8145	17.043	12.2285	5.7067	20.1362	14.4295	5.9419	24.1501	18.2081
2011Q2	-0.3489	7.7136	8.0625	3.1165	9	5.8835	4.5136	15	10.4864	3.7668	18	14.2332	4.0604	20	15.9396
2011Q3	0.0937	4	3.9063	1.4851	6.4101	4.925	2.469	7.3881	4.9191	3.3	9.9385	6.6385	3.7321	13.3453	9.6132
2011Q4	1.0038	4.3	3.2962	2.3	6	3.7	3	7.4503	4.4503	3	11.8918	8.8918	4.0604	10.8627	6.8023
2012Q1	3.6426	9.0686	5.426	3.2561	8	4.7439	3.9287	9.5878	5.6591	4.8871	10.9297	6.0426	4.0382	14.9873	10.9492
2012Q2	4.0118	10.832	6.8202	4	10.0246	6.0246	4.7994	11	6.2006	5.7539	13.4092	7.6552	5.7651	15	9.2349
2012Q3	6.0134	11.5693	5.5559	4.6	11.4	6.8	5.2	13.9957	8.7957	6.6602	15.8786	9.2184	6.6602	17.2293	10.5691
2012Q4	8.2432	16	7.7568	8	13.4139	5.4139	8.2085	16.3395	8.131	8.4902	18	9.5098	9.1462	19.6874	10.5412
2013Q1	10	17	7	8.9238	17.4462	8.5224	7.8411	19	11.1589	9.9347	19.9717	10.037	9.4448	19.1891	9.7442
2013Q2	10.683	17.5	6.817	10.3813	16.5347	6.1534	9.4	19	9.6	8.7748	17.1188	8.344	8.5754	16.5943	8.0189
2013Q3	8.3	13.7368	5.4368	9.1324	15	5.8676	9.5	15	5.5	8.515	15	6.485	7.3967	15	7.6033
2013Q4	5.7551	14.8051	9.05	10.3813	15.0187	4.6375	10	16.8825	6.8825	10	19.8296	9.8296	8.0301	16.1154	8.0853
2014Q1	5.8	13.0982	7.2982	10	18.9985	8.9985	10	17.0547	7.0547	9.0947	17.211	8.1163	8	15	7
2014Q2	7.6	14	6.4	9.0392	14.9719	5.9327	8	17.0311	9.0311	6.684	15.0853	8.4013	7.9097	15.5302	7.6206
2014Q3	5.6185	13.1466	7.5281	5.5	13	7.5	7.0856	13.3	6.2144	7	13.3953	6.3953	6.05	14.225	8.175
2014Q4	4.2861	9.0111	4.725	6.3182	12.2525	5.9343	5.9354	13.6406	7.7053	6	12.6798	6.6798	5.05	11.4926	6.4426
2015Q1	5.5	11.226	5.726	6.5	10.3433	3.8433	6.0935	10.9382	4.8447	6.2406	11.8234	5.5829	5.2	11	5.8
2015Q2	7.3082	10.6561	3.348	6	12.4092	6.4092	6	11.9436	5.9436	4	12	8	5	10.1128	5.1128
2015Q3	6.0857	10.0182	3.9325	5.8233	11.1554	5.3321	5	10.4271	5.4271	4.7385	10	5.2615	5.2926	9.7505	4.4579
2015Q4	6.1205	10.1522	4.0317	5.3035	10.2075	4.904	5.55	10.5025	4.9525	6.211	9.2077	2.9967	5.7	10.0888	4.3888
2016Q1	5.8268	8.5882	2.7614	6	9.8101	3.8101	5.6145	8.9735	3.359	5	8.5619	3.5619	4.0884	8.5	4.4116
2016Q2	5.0332	9.5	4.4668	5.8	8.7748	2.9748	5.6626	9	3.3374	5	8.5	3.5	5.273	8.8	3.527
2016Q3	3.2942	6.8317	3.5375	4.0302	8	3.9698	4.3763	8.4746	4.0983	4.75	8.6684	3.9184	4.4006	8.0809	3.6804
2016Q4	2.4397	5.2478	2.8081	4.1244	7.33	3.2056	4.7366	7.8925	3.1559	4.5002	7	2.4998	2.3	6.5552	4.2552
2017Q1	3.5298	6.6784	3.1486	3.5557	6.9221	3.3664	3.3742	7.4998	4.1256	2.7721	6.643	3.8709	3.4	6	2.6
2017Q2	3.378	7	3.622	3.7517	7	3.2483	3	7	4	3.3787	6.6765	3.2978	3.0251	5.7137	2.6886
2017Q3	1.0124	5.634	4.6216	1.7603	5.2978	3.5375	2	5.2209	3.2209	2	4.9	2.9	1.6897	4.73	3.0404
2017Q4	1.859	5	3.141	3	5.8119	2.8119	3	5.5969	2.5969	2	5.8825	3.8825	2	4.4698	2.4698
2018Q1	2.4553	5.7145	3.2592	1.1305	5.75	4.6195	0.8325	5.1673	4.3349	1.2051	5.1649	3.9597	0.6509	4.0741	3.4232
2018Q2	0	5.3023	5.3023	1.5305	4.7657	3.2352	1.9704	5	3.0296	1.9704	5	3.0296	1.122	5.4661	4.3441
2018Q3	-0.318	3.4	3.718	1	4.0057	3.0057	1.5	4	2.5	1.4074	4.1	2.6926	1.4084	4.9888	3.5804
2018Q4	-1	4.6933	5.6932	0.1874	3.4058	3.2185	0.665	3.0339	2.3689	0.6509	2.6491	1.9982	1.0426	4.2606	3.218
2019Q1	-3.3999	1.2611	4.661	-0.4991	3	3.4991	-0.4645	2.3734	2.8379	0	3.0866	3.0866	0.5	2.7542	2.2542
2019Q2	-1.75	2.75	4.5	0.3155	2.259	1.9435	-0.05	2.5	2.55	0.3646	2.5582	2.1936	0.1058	3	2.8942
2019Q3	-0.7358	2.5045	3.2403	0.1934	2.35	2.1566	-0.8312	2.4547	3.2859	-0.9069	3.1409	4.0478	-0.7976	2.4109	3.2085
2019Q4	1.5	4.2515	2.7515	0.3	3	2.7	0.0033	3.9155	3.9122	0.7613	3.6	2.8387	0.4047	3.2044	2.7997
2020Q1	2.8	6	3.2	1	3.2142	2.2142	1	3	2	1	3.3	2.3	0.9718	3.0792	2.1074
2020Q2	-56.3836	-25	31.3836	-18.0236	8.5948	26.6184	-1.5053	12.9258	14.4311	2.9658	17.851	14.8852	2.6534	14.2883	11.6348
2020Q3	0	22.0143	22.0143	3.8304	9.8	5.9696	2.9317	7	4.0683	1.2665	6	4.7335	1.4464	6.0691	4.6227
2020Q4	5.2029	17.816	12.6131	0.9007	7.593	6.6922	1.0872	9.0675	7.9803	1.4413	7.7721	6.3308	1.9397	6.5064	4.5668
2021Q1	6.0107	18.3	12.2893	2.5	12	9.5	2.6889	9	6.3111	1.6096	7	5.3904	2.1	5	2.9
2021Q2	3.6842	15.0017	11.3175	3.9654	11.5675	7.602	2.1906	8.6704	6.4798	1.9891	7.6077	5.6186	0.8007	5.5223	4.7217
2021Q3	-0.658	9.2759	9.9339	1.9747	6.6711	4.6963	2.0408	5.9363	3.8955	1.2634	4.4795	3.2162	1.0367	4.4618	3.4251
2021Q4	-2.6307	5.0055	7.6362	1.25	5.1424	3.8924	1.7596	4.7883	3.0286	1.5368	4.2459	2.7091	2.3604	3.9934	1.633

[truncated: 2 more sheets: RFEDGOV, RSLGOV]
