# Supplementary material for: Optimal Macroeconomic Policy in Nonlinear Models: A VSTAR Perspective
Source: publisher site journal article supplement (doi:10.1515/snde-2024-0100), 2025-10-08
Supplement: Supplementary file 97 [file Results3BACK.xlsx]

## Sheet: EstimatesLevel
	VSTAR	VARPOL	VAR	VSTARM	VSTARV	VSTARC					log like	Npara	NoRes	LogLik	χ_{NoR}²(5%)	AIC	HIC	SIC
ll	0.00893367	-0.13942	-2.29817	-1.62976	-0.802507	-0.170375				VSTAR	0.00893367	340				1.43203	2.61594	4.44099
b1	-5.32541	-9.78534	0.1	-2.77963	-5.32541	0.543117				VSTARP	-0.13942	304	36	139.155	50.9985	1.57521	2.63377	4.26558
b2	0.922883	1.07535	0.1	1.21992	0.922883	0.7107				VSTARC	-0.170375	338	2	29.0358	5.9915	1.78211	2.95906	4.77338
b3	-0.130953	-0.183315	0.1	-0.319517	-0.130953	-0.171598				VSTARV	-0.802507	163	177	592.94	209.042	2.30011	2.86769	3.74264
b4	-0.0424423	-0.0641022	0.1	-0.0761633	-0.0424423	-0.047574				VSTARM	-1.62976	226	114	1368.9	139.921	4.22328	5.01023	6.22335
b5	-0.865414	-0.72471	0.1	3.64919	-0.865414	0.340637				VAR	-2.29817	77	263	1402.93	98.4844	4.92469	5.19281	5.60613
b6	-0.0598088	0.150792	0.1	0.388985	-0.0598088	-0.167695
b7	0.433502	0.4058	0.1	0.445996	0.433502	0.21718				T	469
b8	0.809192	1.82239	0.1	3.89701	0.809192	0.744281
b9	4.26651	7.74796	0.1	-1.42457	4.26651	0.851516
b10	0.68308	0.60838	0.1	0.59649	0.68308	0.904761
b11	0.0763886	0.111763	0.1	0.195184	0.0763886	0.0721843
b12	-0.0136967	-0.0138276	0.1	-0.00398609	-0.0136967	-0.0101679
b13	-0.501924	-0.892698	0.1	0.416441	-0.501924	-0.140825
b14	0.00949287	-0.0872675	0.1	-0.114347	0.00949287	-0.0556847
b15	-0.157737	-0.209647	0.1	-0.372503	-0.157737	0.0155966
b16	1.72615	0.81416	0.1	-0.0202601	1.72615	-0.258146
b17	-2.22022	-1.96901	0.410499	2.19654	-2.40254	-2.64811
b18	1.05412	1.06527	0.857723	1.45502	1.11795	1.01146
b19	0.0452719	0.0559432	-0.00826158	0.119239	0.0825338	-0.0341304
b20	-0.00828211	-0.00352001	-0.00616173	0.0316961	-0.00676947	0.0363568
b21	0.993295	0.943408	-0.00460942	2.13963	0.243391	-0.473179
b22	0.963037	1.01164	-0.0107679	1.33181	0.992382	0.0700162
b23	-0.546122	-0.574311	0.0127557	-0.818366	-0.443449	-0.141324
b24	0.098484	0.0968888	0.00205181	0.10416	0.0467946	0.240867
b25	3.09918	2.94111	0.410499	-0.91577	2.91675	2.77936
b26	0.615484	0.583761	0.857722	0.11904	0.679327	0.482173
b27	-0.115541	-0.12522	-0.00826195	-0.170941	-0.0768877	-0.0696615
b28	0.00490061	0.00092779	-0.00616168	-0.0390022	0.00561267	-0.0284686
b29	0.499513	0.547181	-0.00461006	1.44054	-0.250285	0.0492046
b30	-1.04518	-1.1018	-0.0107686	-1.4591	-1.01307	-0.134534
b31	0.36403	0.419826	0.0127554	0.749288	0.465004	-0.223881
b32	1.40456e-05	-0.00730661	0.00205225	-0.0349756	-0.050624	-0.0121834
b33	12.4492	39.3301	0.1	34.5381	12.4492	4.86819
b34	-0.955065	-2.48742	0.1	-1.69372	-0.955065	-0.0846928
b35	0.43267	0.140788	0.1	0.461171	0.43267	-0.0386713
b36	-0.1888	-0.257703	0.1	-0.151492	-0.1888	0.0755364
b37	9.93654	17.1328	0.1	6.16439	9.93654	-0.199037
b38	0.266032	0.148159	0.1	-0.197447	0.266032	0.770151
b39	0.185558	0.487202	0.1	0.358012	0.185558	-0.952438
b40	16.3426	18.5925	0.1	19.3292	16.3426	-0.43472
b41	-8.98373	-31.6673	0.1	-24.1548	-8.98373	1.71912
b42	-0.258106	0.289291	0.1	0.0706081	-0.258106	-0.497347
b43	0.762823	0.814694	0.1	0.67265	0.762823	0.802396
b44	0.0925256	0.142912	0.1	0.165037	0.0925256	0.0180693
b45	2.53748	5.9383	0.1	4.18446	2.53748	0.0820835
b46	-0.186367	-0.197176	0.1	-0.0908922	-0.186367	0.0067686
b47	-0.144476	-0.328682	0.1	-0.147125	-0.144476	0.0173184
b48	-9.37526	-12.076	0.1	-14.1385	-9.37526	-0.0229005
b49	-7.28464	-13.6772	0.618839	-29.5276	-6.63571	-3.16487
b50	-0.12255	-0.142173	-0.141475	-0.487127	-0.235966	0.10439
b51	0.531731	0.483213	0.882595	0.339429	0.646503	0.671826
b52	0.174666	0.18769	0.00251442	0.22076	0.118801	0.213527
b53	-3.92067	-4.87215	0.0939866	-8.09966	-1.24984	-1.53579
b54	-0.666264	-0.546935	0.052153	-1.00053	-0.605454	0.0357855
b55	0.226709	0.304181	-0.0510764	0.620307	0.331822	1.64324
b56	0.614775	0.737202	0.0304637	0.65316	0.45007	0.268575
b57	7.61703	13.7496	0.618839	31.0317	8.2659	1.82723
b58	-0.00209337	0.0963153	-0.141475	0.319669	-0.115511	0.0225834
b59	0.921215	0.983897	0.882595	1.19582	1.03599	0.950993
b60	-0.0506084	-0.0715073	0.00251492	-0.142207	-0.10632	-0.0312574
b61	-1.18305	-1.92725	0.0939868	-4.40602	1.48776	-0.032671
b62	0.674508	0.576389	0.0521541	0.892418	0.734697	-0.0284833
b63	-0.570263	-0.702561	-0.0510765	-0.951673	-0.464747	-0.175455
b64	-0.190552	-0.304736	0.0304635	-0.350896	-0.355089	-0.0774789
b65	5.17125	37.7787	0.1	19.3671	5.17125	1.15167
b66	1.2202	-0.0483613	0.1	2.21012	1.2202	-0.0234031
b67	-1.13587	-1.93153	0.1	-2.04669	-1.13587	-0.202759
b68	0.814794	0.855675	0.1	1.10373	0.814794	0.995936
b69	4.56602	15.3905	0.1	9.96981	4.56602	0.976272
b70	1.79917	1.83312	0.1	3.23745	1.79917	0.56758
b71	-2.47667	-2.48989	0.1	-3.70998	-2.47667	-0.529957
b72	2.81002	4.96938	0.1	16.6517	2.81002	-0.446376
b73	-5.39225	-33.6175	0.1	-22.1773	-5.39225	0.401093
b74	-1.22569	-0.783792	0.1	-1.83193	-1.22569	-0.780314
b75	0.538858	0.820997	0.1	1.14331	0.538858	-0.0166101
b76	0.746579	0.742371	0.1	0.617512	0.746579	0.881123
b77	1.18276	5.36462	0.1	2.91039	1.18276	0.755526
b78	-0.292967	-0.399045	0.1	-1.15499	-0.292967	0.0908724
b79	0.564568	0.617828	0.1	1.28645	0.564568	-0.0815868
b80	-5.24084	-7.51429	0.1	-17.4911	-5.24084	0.05671
b81	5.52682	3.31797	1.39384	-10.1106	6.88931	5.14458
b82	-0.303421	-0.303808	-0.575483	-0.596466	-0.542138	-0.322653
b83	-0.380204	-0.472673	0.0842962	-0.735967	-0.355482	-0.100666
b84	1.02295	1.04938	0.914275	1.12371	0.98951	1.03075
b85	-1.99431	-2.65935	0.211692	-5.31062	-0.547467	-0.0597383
b86	-1.68013	-1.93989	-0.00807516	-2.0146	-1.85138	-0.544402
b87	0.609861	0.530848	-0.0144171	-0.235108	0.276176	0.618018
b88	-0.0192076	0.0624355	-0.09557	0.165875	-0.00457117	-0.265086
b89	-5.44533	-4.02024	1.39384	11.1537	-4.08282	-2.32133
b90	-0.288814	-0.228968	-0.575483	-0.173474	-0.52753	-0.294876
b91	0.369382	0.474049	0.0842958	0.761106	0.393922	0.315285
b92	0.904027	0.884283	0.914275	0.797291	0.870582	0.912609
b93	-0.466419	-0.973394	0.211692	-3.17253	0.980409	0.147893
b94	2.05413	2.41384	-0.00807525	2.22415	1.88252	0.356844
b95	-0.0012955	0.10643	-0.0144166	0.731507	-0.334874	0.480752
b96	-0.130249	-0.193037	-0.0955702	-0.332116	-0.11557	-0.167395
b97	-8.20382	-13.4896	0.1	-19.1489	-8.20382	1.36255
b98	0.2745	0.361364	0.1	0.26554	0.2745	-0.0586173
b99	0.134495	0.100424	0.1	0.0053776	0.134495	0.0222805
b100	0.0201719	0.0328022	0.1	0.0535657	0.0201719	-0.0595858
b101	-1.48843	-2.4529	0.1	-2.32768	-1.48843	0.303704
b102	-0.142177	-0.0629655	0.1	-0.0315936	-0.142177	-0.101737
b103	0.41711	0.417576	0.1	0.505719	0.41711	-0.0123474
b104	2.80385	3.31494	0.1	4.88205	2.80385	-0.259502
b105	7.00367	12.0741	0.1	17.9645	7.00367	0.139424
b106	-0.158899	-0.218886	0.1	-0.216347	-0.158899	0.0446311
b107	-0.064725	-0.0660152	0.1	-0.0480257	-0.064725	-0.0250545
b108	-0.000165423	-0.00489553	0.1	-0.0104537	-0.000165423	0.00170482
b109	0.0111407	-0.625784	0.1	-1.0869	0.0111407	0.903762
b110	-0.0715874	-0.0995286	0.1	-0.113591	-0.0715874	-0.0170742
b111	-0.0732884	-0.108232	0.1	-0.19714	-0.0732884	0.0236705
b112	-0.740024	-1.17273	0.1	-2.31774	-0.740024	0.0539981
b113	-1.34146	-2.10776	0.0267134	-3.779	-1.63068	-0.834025
b114	-0.0459701	-0.0550395	0.0444344	-0.00212586	7.73282e-05	-0.00185137
b115	-0.0298632	-0.0245078	-0.0227516	0.00149242	-0.015064	-0.0725817
b116	-0.00270618	-0.00538186	-0.00598538	0.00787054	-0.000322192	0.0264188
b117	0.678511	0.636853	0.968218	0.433312	0.89383	0.955845
b118	0.0961701	0.179143	-0.00998792	0.186238	0.146469	0.126269
b119	-0.0410217	-0.0525689	0.0058862	-0.0584162	0.0455345	0.0351878
b120	0.0771337	0.0865562	0.0167703	0.101159	0.048875	0.0970669
b121	1.94632	2.76383	0.0267134	4.10044	1.65687	0.0887106
b122	0.0510035	0.0497485	0.0444339	0.0266512	0.0963438	0.0340608
b123	-0.0342179	-0.0409552	-0.0227509	-0.0647959	-0.0194174	-0.0374094
b124	-0.0147739	-0.0135864	-0.00598556	-0.0195157	-0.012383	-0.00884581
b125	0.827907	0.784977	0.968217	0.656847	1.04322	0.961769
b126	-0.226173	-0.312176	-0.00998789	-0.277452	-0.168563	0.0080612
b127	-0.12568	-0.130603	0.00588652	-0.069734	-0.0349162	-0.0529783
b128	0.000145016	-0.00821836	0.0167695	-0.0197984	-0.023556	0.0253157
b129	-10.2955	-15.0197	0.1	-51.8651	-10.2955	-2.47734
b130	0.231178	0.0687621	0.1	0.144556	0.231178	-0.112235
b131	-0.0992629	-0.0501879	0.1	-0.246102	-0.0992629	0.0480646
b132	0.0720734	-0.0028936	0.1	0.170426	0.0720734	-0.053799
b133	-7.91718	-7.6073	0.1	-17.6804	-7.91718	0.0181133
b134	1.15623	1.11511	0.1	0.750028	1.15623	1.26054
b135	-0.366382	-0.356031	0.1	-0.244783	-0.366382	-0.127463
b136	-3.14114	-2.5083	0.1	-7.33909	-3.14114	0.426546
b137	11.5646	16.3153	0.1	55.903	11.5646	0.542076
b138	-0.226838	-0.191834	0.1	-0.326731	-0.226838	-0.0331173
b139	0.0670544	0.0563053	0.1	0.117698	0.0670544	-0.00755022
b140	-0.0464679	-0.0345168	0.1	-0.094193	-0.0464679	0.00176339
b141	-2.23256	-2.79245	0.1	-7.54111	-2.23256	-0.027779
b142	0.992973	0.982814	0.1	1.12491	0.992973	0.980665
b143	0.158695	0.186905	0.1	0.244805	0.158695	-0.000173123
b144	2.12654	1.72533	0.1	5.7829	2.12654	-0.0591135
b145	0.665021	0.105796	0.109395	2.72722	0.593739	0.263239
b146	-0.0247111	0.98713	-0.0156234	-0.0619396	-0.0180162	-0.026311
b147	0.0293016	0.0552763	-0.00800227	0.0271071	0.0134203	-0.000706243
b148	-0.0116048	0.979176	0.00282066	-0.0217032	-0.00556306	0.0199138
b149	0.39902	-7.3797	0.0282874	0.591315	0.131494	0.0454823
b150	1.12441	0.622033	0.990983	1.08876	1.13216	0.847284
b151	-0.124191	0.0878244	0.00667882	-0.0357577	-0.0955021	-0.0201424
b152	-0.0312681	-0.201573	-0.0017221	-0.0571006	-0.0195027	0.0361645
b153	-0.250599	4.22376	0.109395	-2.43327	-0.321664	1.1388
b154	-0.022929	0.163224	-0.0156227	0.0220011	-0.0162359	-0.0108282
b155	-0.0206345	1.44986	-0.00800253	-0.0207759	-0.0261929	-0.011864
b156	0.00641034	2.83183	0.00282048	0.0142418	0.00822665	-0.00281465
b157	0.169978	2.12052	0.0282884	0.366291	-0.0970517	0.00592974
b158	0.831142	-0.785293	0.990982	0.8958	0.839423	0.755556
b159	0.0901744	-0.0248375	0.00667838	-0.0264801	0.115233	-0.03759
b160	0.015502	-0.0127077	-0.00172295	0.0445059	0.0147933	-0.00293438
b161	-10.5446	0.102738	0.1	-20.5114	-10.5446	0.728496
b162	0.397013	-0.108814	0.1	1.20951	0.397013	0.292013
b163	0.0661395	0.785764	0.1	-0.502358	0.0661395	-0.0446083
b164	-0.159412	-0.261842	0.1	-0.0652745	-0.159412	0.0610808
b165	3.9339	0.400914	0.1	4.75654	3.9339	-0.0850365
b166	0.362466	0.686251	0.1	1.51466	0.362466	-0.717799
b167	1.44412	-0.595814	0.1	0.991629	1.44412	1.67744
b168	3.49112	1.44996	0.1	5.91761	3.49112	0.471132
b169	2.98032	-0.0453928	0.1	9.73423	2.98032	2.18773
b170	-0.627904	2.35042	0.1	-1.15089	-0.627904	-0.265327
b171	-0.0435671	0.0678784	0.1	0.196202	-0.0435671	-0.015379
b172	-0.0118324	0.108105	0.1	-0.0559942	-0.0118324	-0.0234577
b173	0.0564334	-0.911477	0.1	-0.904743	0.0564334	-0.246085
b174	-0.0650283	-0.507976	0.1	-0.455756	-0.0650283	-0.055672
b175	0.751317	0.299784	0.1	0.616484	0.751317	0.992305
b176	0.503767	-0.0335856	0.1	-0.951382	0.503767	-0.236073
b177	-0.63457	0.476768	0.132688	2.25976	-0.97859	0.618195
b178	0.0125737	0.315978	-0.000409463	0.00369847	0.0206866	-0.0506073
b179	0.00523136	-0.182519	0.00485973	0.0146712	0.00998183	0.0459814
b180	-0.00522436	1.03057	-0.00946036	0.0128113	-0.00608246	-0.0599815
b181	0.766968	-0.554394	-0.0135461	2.16951	0.260935	0.150917
b182	0.590735	0.207853	-0.0116938	1.57152	0.691197	-0.0854992
b183	0.5217	-0.122645	1.00101	-0.169158	0.464299	0.150495
b184	0.0348094	0.0458096	-0.00978817	0.050577	0.0213494	0.0503833
b185	1.46892	0.304248	0.132688	-0.672363	1.12478	0.795446
b186	-0.0226256	-0.0948318	-0.000409717	-0.0836979	-0.0140543	0.0243751
b187	-0.0115977	0.00799853	0.00485946	-0.0237203	-7.01633e-05	0.0226063
b188	-0.00136009	0.960602	-0.0094613	-0.0173894	-0.00222137	-0.00911089
b189	0.245241	0.152106	-0.013547	0.934171	-0.260595	0.00626911
b190	-0.811944	0.0576857	-0.0116934	-1.89682	-0.708586	-0.0723342
b191	1.57517	-0.536211	1.00101	2.29947	1.51754	0.409683
b192	-0.0295008	-0.359238	-0.00978795	-0.0691286	-0.0339518	0.0002767
b193	-3.48625	-0.271598	0.1	-11.4069	-3.48625	-1.42404
b194	0.148931	0.640552	0.1	1.83322	0.148931	0.0148692
b195	-0.0873138	0.0220111	0.1	-1.00994	-0.0873138	-0.00576841
b196	-0.00839485	-0.00238837	0.1	0.421331	-0.00839485	0.00128828
b197	0.678762	-0.0250401	0.1	-1.46313	0.678762	-0.413451
b198	0.23484	0.0721099	0.1	1.13116	0.23484	0.443835
b199	0.0182329	0.0116815	0.1	-0.92563	0.0182329	-0.397772
b200	4.52304	0.00686276	0.1	8.31607	4.52304	0.920047
b201	0.665834	0.014598	0.1	8.6977	0.665834	0.188494
b202	-0.00173877	-0.00404451	0.1	-0.397967	-0.00173877	-0.00353412
b203	0.021156	0.0771941	0.1	0.358001	0.021156	0.00291268
b204	-0.00202804	-0.0585414	0.1	-0.123504	-0.00202804	-0.000417853
b205	-0.0336008	0.0372196	0.1	-0.98626	-0.0336008	-0.0278414
b206	-0.0563293	0.0696719	0.1	-0.428703	-0.0563293	-0.00797719
b207	-0.0220837	-0.0212433	0.1	0.223405	-0.0220837	0.000531053
b208	-0.212995	-0.139215	0.1	-5.88844	-0.212995	0.802476
b209	0.495902	0.121078	0.638586	-6.47261	0.672987	-0.0573016
b210	-0.354036	-0.0208466	-0.275616	-0.926103	-0.169109	-0.305283
b211	0.308181	-0.0811321	0.108742	0.178063	0.222747	0.228742
b212	-0.0300969	-0.0388809	-0.0310237	0.056917	-0.0351844	0.0590137
b213	0.569491	-0.0151845	-0.0162805	-2.21526	0.0294752	-0.032964
b214	0.0481345	0.0195532	-0.0590444	-0.388773	0.0105276	-0.15032
b215	-0.0650758	0.0595694	0.0491262	-0.346567	-0.000491149	-0.11012
b216	0.971414	-2.97571e-07	0.92143	0.755033	0.980926	0.919186
b217	-0.72462	0.213299	0.638586	9.29726	-0.546848	1.45682
b218	-0.0489328	-0.0722283	-0.275616	-0.146489	0.129468	-0.823898
b219	-0.138863	0.433696	0.108743	0.175022	-0.214462	0.118837
b220	0.0574254	0.0983001	-0.0310236	-0.115964	0.0312297	-0.0693219
b221	0.504303	-0.0086655	-0.0162807	-1.71847	-0.0309103	0.0144454
b222	-0.0443336	0.7183	-0.0590448	0.130763	-0.0101658	0.12984
b223	-0.0536652	0.0127399	0.0491262	0.530178	-0.00152239	0.802982
b224	0.995676	0.00910836	0.92143	0.947863	1.00519	0.808994
b225	0.155663	-0.00436806	0.1	0.155663	0.140802	-0.114625
b226	0.0634764	-0.120571	0.1	0.0634764	0.0140457	-0.310388
b227	-0.503587	-0.0309597	0.1	-0.503587	-0.288362	0.214762
b228	-0.345626	0.00344339	0.1	-0.345626	-0.336727	-0.0420051
b229	-0.271528	-0.0187628	0.1	-0.271528	-0.386021	0.621126
b230	0.632417	0.0100586	0.1	0.632417	0.63459	-0.33325
b231	0.0230808	0.139997	0.1	0.0230808	0.0165412	-0.0168157
b232	0.00109631	0.119545	0.1	0.00109631	-0.00349318	-0.0404822
b233	-0.0282683	-0.0287008	0.1	-0.0282683	-0.0377276	-0.0156675
b234	0.0743781	0.000743858	0.1	0.0743781	0.0888604	-0.034176
b235	0.0183002	-0.0292901	0.1	0.0183002	0.0409335	-0.0323385
b236	0.00341428	-0.0117125	0.1	0.00341428	0.106046	0.0113414
b237	0.0105294	0.3508	0.1	0.0105294	0.0386423	-0.00555539
b238	-0.00312603	-0.00678163	0.1	-0.00312603	0.0218754	0.0180121
b239	-0.0748448	-0.00431632	0.1	-0.0748448	0.0084147	0.00350792
b240	-0.0524596	-0.00106293	0.1	-0.0524596	-0.0937153	0.192773
b241	0.0386107	0.00137617	0.1	0.0386107	-0.127303	0.0114865
b242	0.0740133	-0.00522354	0.1	0.0740133	0.0682228	0.0181682
b243	-0.024347	-0.00413557	0.1	-0.024347	-0.104255	-0.0224064
b244	0.107128	0.0191169	0.1	0.107128	0.0454032	-0.00989233
b245	0.107052	0.235372	0.1	0.107052	0.174319	-7.04944e-05
b246	-0.0248792	-0.0558964	0.1	-0.0248792	-0.0498365	-0.0209641
b247	-0.065221	0.652899	0.1	-0.065221	-0.0584842	0.0243512
b248	-0.0298277	0.165801	0.1	-0.0298277	-0.0198349	0.0308827
b249	-0.0148674	0.0673573	0.1	-0.0148674	-0.0314553	0.0341289
b250	7.54768e-05	0.500279	0.1	7.54768e-05	0.0121492	0.00220328
b251	0.0627904	-0.0183712	0.1	0.0627904	0.0608123	8.22768e-06
b252	0.0180046	-0.00307893	0.1	0.0180046	-2.12571e-05	-1.67932e-05
b253	0.211448	-0.000980829	0.1	0.211448	0.268014	0.253057
b254	-0.0782069	-0.142949	0.1	-0.0782069	-0.135458	-0.157521
b255	0.447867	0.00125776	0.1	0.447867	0.482795	0.432603
b256	0.105065	-0.00246675	0.1	0.105065	-0.0531287	-0.0246931
b257	-0.00606867	0.0114801	0.1	-0.00606867	0.0849481	-0.0837196
b258	0.728992	0.0107258	0.1	0.728992	0.87407	0.813874
b259	0.0122487	-0.101382	0.1	0.0122487	0.0183394	0.0097809
b260	0.0106852	0.00719618	0.1	0.0106852	0.00791163	0.0183778
b261	-0.00436865	-0.00719879	0.1	-0.00436865	-0.0233154	-0.0126724
b262	-0.120586	-0.0333581	0.1	-0.120586	-0.131011	-0.132423
b263	-0.0371483	0.0241011	0.1	-0.0371483	-0.0218712	-0.0161018
b264	-0.00252919	-0.015117	0.1	-0.00252919	-0.0196451	-0.0269356
b265	-0.0167907	-0.0261482	0.1	-0.0167907	-0.028688	-0.0351615
b266	0.0113621	-0.0535483	0.1	0.0113621	0.00706504	0.00236027
b267	0.136972	-0.0258792	0.1	0.136972	0.16442	0.150133
b268	0.104678	0.0619459	0.1	0.104678	0.237155	0.203734
b269	-0.0215386	-0.0511422	0.1	-0.0215386	-0.0539668	-0.00806019
b270	0.00596944	-0.0211223	0.1	0.00596944	0.00441496	0.0224728
b271	-0.0275392	0.103953	0.1	-0.0275392	-0.0139129	-0.0057794
b272	-0.0254523	-2.84798e-07	0.1	-0.0254523	-0.012855	-0.00314874
b273	0.323621	0.425674	0.1	0.323621	0.385028	-0.350336
b274	-0.00252152	-0.196772	0.1	-0.00252152	-0.0123322	-0.0105186
b275	-0.00129986	0.949913	0.1	-0.00129986	0.0013446	0.000626211
b276	-0.000617666	-0.24414	0.1	-0.000617666	0.00210619	0.000430862
b277	0.000729982	0.307813	0.1	0.000729982	-0.000275491	-0.000259425
b278	0.000315869	0.945431	0.1	0.000315869	-0.00481876	-0.00558512
b279	-0.00428896	0.0540972	0.1	-0.00428896	-0.0113483	0.00357064
b280	-0.0151171	-0.0244651	0.1	-0.0151171	-0.0248033	0.0158266
b281	0.247273	-0.0436395	0.309139	0.171956	0.233429	0.173331
b282	-0.0649338	0.16248	-0.126321	-0.0577386	-0.0287441	0.123787
b283	0.691962	-0.002885	0.685128	0.528785	0.73655	0.551264
b284	0.178832	0.00884508	-0.137886	0.0896794	0.0551969	0.110779
b285	0.061077	-0.00117844	0.199116	0.0390648	0.113675	0.180112
b286	-0.481933	-0.00598963	0.843893	-0.461875	-0.55519	0.426989
b287	-0.018759	0.0796132	0.0313248	0.0642401	-0.00889041	-0.0506817
b288	-0.00222276	0.00907176	-0.00459328	0.00929063	0.00219978	-0.00130188
b289	-0.00828072	-0.00970233	-0.0345799	0.0040477	0.0166791	-0.00250565
b290	0.145876	-0.022537	0.138526	0.098997	0.130086	-0.104087
b291	0.00514074	-0.0250487	-0.00502581	-0.0495299	-0.00177026	-0.0108968
b292	-0.00620739	0.0345146	-0.0053107	0.00477085	0.00814312	-0.039191
b293	-0.0087945	0.118925	-0.0121049	-0.0138255	-0.0228744	0.0113593
b294	-0.00978501	0.118321	-0.00599941	0.000747976	-0.0109927	0.0107009
b295	-0.104037	0.197495	0.126685	-0.126292	-0.0890981	0.0915249
b296	0.00293633	0.285926	0.0951314	0.0482115	0.0163833	0.0188793
b297	-0.00336463	-0.113586	-0.0257476	-0.0085508	-0.0248644	0.0490065
b298	0.0488167	-0.154725	0.00656731	0.0020216	0.0372695	0.0116921
b299	-0.0159436	0.0207815	-0.00834668	-0.0153586	-0.0082586	0.00352971
b300	-0.0165356	0.814716	-0.0206316	0.0434985	-0.0189435	-0.00856267
b301	0.0302829	0.505201	0.306967	0.106777	0.0312019	1.66747e-05
b302	-0.056369	6.64727	0.0204589	0.0497868	-0.063249	-0.0567415
b303	-0.0316294	1.28839	0.0715448	0.0561524	0.0139254	-0.0356971
b304	-0.0604122	5.38013	0.10526	-0.0770133	-0.0176966	0.00759804
b305	0.0533543		-0.0382929	-0.0452813	0.0496741	-0.0342747
b306	-0.0152688		0.00182663	-0.0365684	-0.012421	0.0476609
b307	-0.113814		-0.0548267	-0.0876309	-0.210504	9.12531e-06
b308	-2.96086e-05		0.502189	-0.00120094	1.06062e-06	-7.88043e-06
b309	0.433758		0.309137	0.356672	0.415191	0.395994
b310	-0.203078		-0.126322	-0.128437	-0.188178	-0.230294
b311	0.96082		0.685125	0.749711	0.941979	0.943042
b312	-0.258473		-0.137892	-0.162298	-0.277783	-0.177365
b313	0.327249		0.199118	0.263278	0.324999	0.25613
b314	0.957361		0.84389	0.9803	0.970861	0.938271
b315	0.0547854		0.0313294	0.0086107	0.0625789	0.0551357
b316	-0.0278663		-0.00459607	-0.0211922	-0.0151441	-0.0124771
b317	-0.0450266		-0.034576	-0.0445146	-0.0481883	-0.0391483
b318	0.163935		0.138528	0.146915	0.160196	0.162992
b319	-0.00350187		-0.00502159	0.00959127	0.00123358	-0.00427442
b320	0.015337		-0.00531467	-0.000843656	0.00616471	0.0180196
b321	-0.00342892		-0.0121046	-0.00899089	-0.00624252	-0.00010046
b322	-0.0031941		-0.00600041	0.00220418	-0.0004907	-0.00532823
b323	-0.0722667		0.126681	-0.077845	-0.0835903	0.0693628
b324	0.0118978		0.0951303	0.0379667	0.00744796	0.00162837
b325	-0.0148952		-0.0257418	-0.0217585	-0.00490267	-0.000990723
b326	-0.0300089		0.0065643	0.00227618	-0.0223934	-0.0221179
b327	-0.0242451		-0.00833992	-0.00334386	-0.0105715	-0.0128345
b328	-0.0341124		-0.0206323	-0.0236736	-0.0305843	0.0316621
b329	0.123775		0.306964	0.338799	0.106567	0.0833177
b330	0.123188		0.0204616	0.0218978	0.0740637	0.0397175
b331	0.215806		0.0715392	0.107722	0.143655	0.132862
b332	0.303462		0.105256	0.131954	0.269443	0.201154
b333	-0.112384		-0.0382952	-0.0485237	-0.116259	-0.0426254
b334	0.205812		0.00182715	0.0677219	0.0874685	-0.168666
b335	0.0354326		-0.0548307	-0.0342099	0.0190614	0.126068
b336	0.815164		0.502188	0.655316	0.831051	-0.655902
b337	0.619865		0	0.373691	0.619865	1.77714
b338	6.91128		0	6.91128	6.54578	4.64878
b339	1.27473		0	1.07385	1.27473	1.27473
b340	5.74883		0	5.74883	4.17754	5.74883
	VSTAR	VARPOL	VAR	VSTARM	VSTARV	VSTARC
		VSTAR	VARPOL	VSTARC	VSTARV	VSTARM
slopelogM = b(337);		0.619865	0.505201	1.77714	0	0.373691
slopelogV = b(338);		6.91128	6.64727	4.64878	6.54578	0
slopegamM = b(339);		1.27473	1.28839	1.77714	0	1.07385
slopegamV = b(340);		5.74883	5.38013	4.64878	4.17754	0

## Sheet: LinearVAR
			bhatmat									b								VAR estimated from LinearEstimation
b1	0.1		0.1	0.1	0.1	0.1	0.1	0.1	0.1			0.857723	-0.141475	-0.575483	0.0444341	-0.015623	-0.00040959	-0.275616		0.857722	-0.141474	-0.57548	0.0444341	-0.0156235	-0.000410193	-0.275616
b2	0.1		0.1	0.1	0.1	0.1	0.1	0.1	0.1			-0.00826176	0.882595	0.084296	-0.0227513	-0.0080024	0.0048596	0.108743		-0.00826177	0.882594	0.0842947	-0.0227513	-0.00800249	0.0048598	0.108742
b3	0.1		0.1	0.1	0.1	0.1	0.1	0.1	0.1			-0.00616171	0.00251467	0.914275	-0.00598547	0.00282057	-0.00946083	-0.0310237		-0.00616181	0.00251485	0.914276	-0.00598553	0.00282057	-0.00946091	-0.0310236
b4	0.1		0.1	0.1	0.1	0.1	0.1	0.1	0.1			-0.00460974	0.0939867	0.211692	0.968217	0.0282879	-0.0135466	-0.0162806		-0.00461021	0.0939888	0.211697	0.968217	0.0282879	-0.0135469	-0.0162797
b5	0.1		0.1	0.1	0.1	0.1	0.1	0.1	0.1			-0.0107683	0.0521536	-0.0080752	-0.00998791	0.990982	-0.0116936	-0.0590446		-0.0107686	0.052154	-0.00807439	-0.00998806	0.990982	-0.011694	-0.0590446
b6	0.1		0.1	0.1	0.1	0.1	0.1	0.1	0.1			0.0127555	-0.0510764	-0.0144169	0.00588636	0.0066786	1.00101	0.0491262		0.0127559	-0.0510775	-0.0144193	0.00588656	0.00667859	1.00101	0.0491258
b7	0.1		0.1	0.1	0.1	0.1	0.1	0.1	0.1			0.00205203	0.0304636	-0.0955701	0.0167699	-0.00172253	-0.00978806	0.92143		0.00205211	0.0304635	-0.0955705	0.01677	-0.00172254	-0.00978821	0.921429
b8	0.1		0.1	0.1	0.1	0.1	0.1	0.1	0.1			0.410499	0.618839	1.39384	0.0267134	0.109395	0.132688	0.638586		0.410502	0.618843	1.39385	0.0267137	0.109397	0.13269	0.638589
b9	0.1		0.1	0.1	0.1	0.1	0.1	0.1	0.1
b10	0.1		0.1	0.1	0.1	0.1	0.1	0.1	0.1
b11	0.1		0.1	0.1	0.1	0.1	0.1	0.1	0.1
b12	0.1		0.1	0.1	0.1	0.1	0.1	0.1	0.1
b13	0.1		0.1	0.1	0.1	0.1	0.1	0.1	0.1
b14	0.1		0.1	0.1	0.1	0.1	0.1	0.1	0.1
b15	0.1		0.1	0.1	0.1	0.1	0.1	0.1	0.1
b16	0.1		0.1	0.1	0.1	0.1	0.1	0.1	0.1
b17	0.410499		0.410499	0.618839	1.39384	0.0267134	0.109395	0.132688	0.638586
b18	0.857723		0.857723	-0.141475	-0.575483	0.0444344	-0.0156234	-0.000409463	-0.275616
b19	-0.00826158		-0.00826158	0.882595	0.0842962	-0.0227516	-0.00800227	0.00485973	0.108742
b20	-0.00616173		-0.00616173	0.00251442	0.914275	-0.00598538	0.00282066	-0.00946036	-0.0310237
b21	-0.00460942		-0.00460942	0.0939866	0.211692	0.968218	0.0282874	-0.0135461	-0.0162805
b22	-0.0107679		-0.0107679	0.052153	-0.00807516	-0.00998792	0.990983	-0.0116938	-0.0590444
b23	0.0127557		0.0127557	-0.0510764	-0.0144171	0.0058862	0.00667882	1.00101	0.0491262
b24	0.00205181		0.00205181	0.0304637	-0.09557	0.0167703	-0.0017221	-0.00978817	0.92143
b25	0.410499		0.410499	0.618839	1.39384	0.0267134	0.109395	0.132688	0.638586
b26	0.857722		0.857722	-0.141475	-0.575483	0.0444339	-0.0156227	-0.000409717	-0.275616
b27	-0.00826195		-0.00826195	0.882595	0.0842958	-0.0227509	-0.00800253	0.00485946	0.108743
b28	-0.00616168		-0.00616168	0.00251492	0.914275	-0.00598556	0.00282048	-0.0094613	-0.0310236
b29	-0.00461006		-0.00461006	0.0939868	0.211692	0.968217	0.0282884	-0.013547	-0.0162807
b30	-0.0107686		-0.0107686	0.0521541	-0.00807525	-0.00998789	0.990982	-0.0116934	-0.0590448
b31	0.0127554		0.0127554	-0.0510765	-0.0144166	0.00588652	0.00667838	1.00101	0.0491262
b32	0.00205225		0.00205225	0.0304635	-0.0955702	0.0167695	-0.00172295	-0.00978795	0.92143
b33	0.1
b34	0.1
b35	0.1
b36	0.1
b37	0.1
b38	0.1
b39	0.1
b40	0.1
b41	0.1
b42	0.1
b43	0.1
b44	0.1
b45	0.1
b46	0.1
b47	0.1
b48	0.1
b49	0.618839
b50	-0.141475
b51	0.882595
b52	0.00251442
b53	0.0939866
b54	0.052153
b55	-0.0510764
b56	0.0304637
b57	0.618839
b58	-0.141475
b59	0.882595
b60	0.00251492
b61	0.0939868
b62	0.0521541
b63	-0.0510765
b64	0.0304635
b65	0.1
b66	0.1
b67	0.1
b68	0.1
b69	0.1
b70	0.1
b71	0.1
b72	0.1
b73	0.1
b74	0.1
b75	0.1
b76	0.1
b77	0.1
b78	0.1
b79	0.1
b80	0.1
b81	1.39384
b82	-0.575483
b83	0.0842962
b84	0.914275
b85	0.211692
b86	-0.00807516
b87	-0.0144171
b88	-0.09557
b89	1.39384
b90	-0.575483
b91	0.0842958
b92	0.914275
b93	0.211692
b94	-0.00807525
b95	-0.0144166
b96	-0.0955702
b97	0.1
b98	0.1
b99	0.1
b100	0.1
b101	0.1
b102	0.1
b103	0.1
b104	0.1
b105	0.1
b106	0.1
b107	0.1
b108	0.1
b109	0.1
b110	0.1
b111	0.1
b112	0.1
b113	0.0267134
b114	0.0444344
b115	-0.0227516
b116	-0.00598538
b117	0.968218
b118	-0.00998792
b119	0.0058862
b120	0.0167703
b121	0.0267134
b122	0.0444339
b123	-0.0227509
b124	-0.00598556
b125	0.968217
b126	-0.00998789
b127	0.00588652
b128	0.0167695
b129	0.1
b130	0.1
b131	0.1
b132	0.1
b133	0.1
b134	0.1
b135	0.1
b136	0.1
b137	0.1
b138	0.1
b139	0.1
b140	0.1
b141	0.1
b142	0.1
b143	0.1
b144	0.1
b145	0.109395
b146	-0.0156234
b147	-0.00800227
b148	0.00282066
b149	0.0282874
b150	0.990983
b151	0.00667882
b152	-0.0017221
b153	0.109395
b154	-0.0156227
b155	-0.00800253
b156	0.00282048
b157	0.0282884
b158	0.990982
b159	0.00667838
b160	-0.00172295
b161	0.1
b162	0.1
b163	0.1
b164	0.1
b165	0.1
b166	0.1
b167	0.1
b168	0.1
b169	0.1
b170	0.1
b171	0.1
b172	0.1
b173	0.1
b174	0.1
b175	0.1
b176	0.1
b177	0.132688
b178	-0.000409463
b179	0.00485973
b180	-0.00946036
b181	-0.0135461
b182	-0.0116938
b183	1.00101
b184	-0.00978817
b185	0.132688
b186	-0.000409717
b187	0.00485946
b188	-0.0094613
b189	-0.013547
b190	-0.0116934
b191	1.00101
b192	-0.00978795
b193	0.1
b194	0.1
b195	0.1
b196	0.1
b197	0.1
b198	0.1
b199	0.1
b200	0.1
b201	0.1
b202	0.1
b203	0.1
b204	0.1
b205	0.1
b206	0.1
b207	0.1
b208	0.1
b209	0.638586
b210	-0.275616
b211	0.108742
b212	-0.0310237
b213	-0.0162805
b214	-0.0590444
b215	0.0491262
b216	0.92143
b217	0.638586
b218	-0.275616
b219	0.108743
b220	-0.0310236
b221	-0.0162807
b222	-0.0590448
b223	0.0491262
b224	0.92143
b225	0.1
b226	0.1
b227	0.1
b228	0.1
b229	0.1
b230	0.1
b231	0.1
b232	0.1
b233	0.1
b234	0.1
b235	0.1
b236	0.1
b237	0.1
b238	0.1
b239	0.1
b240	0.1
b241	0.1
b242	0.1
b243	0.1
b244	0.1
b245	0.1
b246	0.1
b247	0.1
b248	0.1
b249	0.1
b250	0.1
b251	0.1
b252	0.1
b253	0.1
b254	0.1
b255	0.1
b256	0.1
b257	0.1
b258	0.1
b259	0.1
b260	0.1
b261	0.1
b262	0.1
b263	0.1
b264	0.1
b265	0.1
b266	0.1
b267	0.1
b268	0.1
b269	0.1
b270	0.1
b271	0.1
b272	0.1
b273	0.1
b274	0.1
b275	0.1
b276	0.1
b277	0.1
b278	0.1
b279	0.1
b280	0.1
b281	0.309139
b282	-0.126321
b283	0.685128
b284	-0.137886
b285	0.199116
b286	0.843893
b287	0.0313248
b288	-0.00459328
b289	-0.0345799
b290	0.138526
b291	-0.00502581
b292	-0.0053107
b293	-0.0121049
b294	-0.00599941
b295	0.126685
b296	0.0951314
b297	-0.0257476
b298	0.00656731
b299	-0.00834668
b300	-0.0206316
b301	0.306967
b302	0.0204589
b303	0.0715448
b304	0.10526
b305	-0.0382929
b306	0.00182663
b307	-0.0548267
b308	0.502189
b309	0.309137
b310	-0.126322
b311	0.685125
b312	-0.137892
b313	0.199118
b314	0.84389
b315	0.0313294
b316	-0.00459607
b317	-0.034576
b318	0.138528
b319	-0.00502159
b320	-0.00531467
b321	-0.0121046
b322	-0.00600041
b323	0.126681
b324	0.0951303
b325	-0.0257418
b326	0.0065643
b327	-0.00833992
b328	-0.0206323
b329	0.306964
b330	0.0204616
b331	0.0715392
b332	0.105256
b333	-0.0382952
b334	0.00182715
b335	-0.0548307
b336	0.502188
b337	0
b338	0
b339	0
b340	0

## Sheet: SummaryStats
	Sum Stats
		s	p	ip	u	TS	OS	FFR
	REC/NOR	2.76907	6.20227	-2.16665	1.14302	4.09328	1.81123	8.35981		11.465
	EXP/NOR	2.0734	6.50313	2.91186	0.372048	5.46684	1.88523	5.45696		70.4883
	REC/ZLB	5.14429	-2.27184	-14.0926	3.34095	3.68005	10.5577	0.178571		1.4862
	EXP/ZLB	2.84474	3.46612	1.79957	2.41513	10.2721	9.5146	0.125385		16.5605
	Average	2.32654	5.83528	1.89269	0.842909	6.07858	3.2691	4.82839
	REC/NOR	0.931352	2.88286	3.53812	1.41876	0.573479	1.88813	5.32344
	EXP/NOR	0.543845	2.01056	3.03172	1.06744	2.4784	2.82132	3.42996
	REC/ZLB	0.719858	0.681282	1.37585	0.759585	0.515398	0.900847	0.0279455
	EXP/ZLB	0.344499	1.4386	3.8088	1.21518	3.11389	1.45038	0.0390369
	Average	0.750166	2.52387	4.08897	1.39601	3.11065	3.90183	4.14558

## Sheet: log like
	Model	log-like	NoP	NoR	LR	χ_{NoR}²(5%)	χ_{NoR}²(5%)
	VSTAR	-0.183316	340
	VSTARC	-0.544234	338	2	339.263	5.9915
	VSTARV	-0.996579	338	2	764.466	5.9915
	VSTARM	-1.69473	338	2	1420.73	5.9915
	VAR	-2.29817	336	4	1987.96	9.4877
	chi2inv(0.95,NoR)

## Sheet: OptimGains
		3 instrument: TS, PS, FFR
		1 period ahead
		s	p	ip	u	TS	PS	R	DeltaTS	DeltaPS	DeltaR	Loss	Losscheck
	VSTAR	1.00348	1.86584	4.42185	1.39266	3.21461	3.58499	3.3149	2.35444	1.57595	0.537643	7.72654	7.72654
	VSTARM	0.521579	1.90333	4.12789	1.3696	3.00081	3.18243	3.3114	0.32082	0.471667	0.525378	4.59079	4.59079
	VSTARV	1.27415	1.54986	3.80492	1.33172	3.07807	3.51289	3.35856	0.297259	0.372449	0.537673	4.08895	4.08895
	VAR	0.525132	1.88466	4.08747	1.3848	2.84154	3.15358	3.17478	0.219848	0.456344	0.507543	4.45319	4.45319
	VSTARP	0.62303	1.84045	4.22267	1.39529	3.3665	3.35537	3.43352	0.506871	0.566182	0.535657	4.84444	4.84444
	VSTARC	0.566416	1.81452	4.08418	1.39737	2.81381	3.20569	3.43794	0.544433	0.607099	0.648834	5.01226	5.01226
		3 instruments
	VSTAR	0.588207	0.959117	3.35402	0.35176	1.88496	2.24815	1.05855	0.224243	0.494512	0.238434	2.26807	2.26807
	VSTARM	0.523133	0.878261	3.07813	0.316337	2.13782	2.22891	0.961552	0.201786	0.446547	0.213088	2.05602	2.05602
	VSTARV	0.633889	0.900797	4.3724	0.59043	2.90328	2.38296	1.86384	0.292754	0.405165	0.271044	2.46019	2.46019
	VAR	0.503361	0.915978	3.51213	0.488939	1.70086	2.28124	1.34944	0.211495	0.482362	0.243397	2.34217	2.34217
	VSTARP	0.601527	0.964227	3.42806	0.375942	2.04259	2.39787	1.08618	0.227114	0.496538	0.239439	2.30326	2.30326
	VSTARC	0.525787	0.705189	2.36751	0.235674	1.26178	2.48089	1.24467	0.195348	0.408991	0.191922	1.73712	1.73712
	DATA	0.750166	2.52387	4.08897	1.39601	3.11065	3.90183	4.14558	0.137691	0.326643	0.565864	4.95009
		1 instrument: FFR
	VSTAR	1-period ahead
		s	p	ip	u	TS	PS	R	DeltaTS	DeltaPS	DeltaR	Loss	Losscheck
		0.750166	2.52387	4.08897	1.39601	3.11065	3.90183	4.14558	0.137691	0.326643	0.565864	4.48575	4.48575
		0.750166	2.52387	4.08897	1.39601	3.11065	3.90183	4.14558	0.137691	0.326643	0.565864	4.48575	4.48575
		0.751846	2.24465	3.92122	1.39679	3.10649	3.8426	2.80613	0.141547	0.327102	0.562852	4.20429	4.20429
		Dynamic
		0.750166	2.52387	4.08897	1.39601	3.11065	3.90183	4.14558	0.137691	0.326643	0.565864	4.48575	4.48575
		3.64664	6.37943	8.61985	1.79705	6.19045	12.9133	5.07466	0.626496	2.78045	0.761304	8.93778	8.93778
		0.623252	1.23545	3.73747	1.22004	1.49668	1.55578	2.26351	0.197695	0.225186	0.456487	2.91198	2.91198
	VAR	1-period ahead
		s	p	ip	u	TS	PS	R	DeltaTS	DeltaPS	DeltaR	Loss	Losscheck
		0.750166	2.52387	4.08897	1.39601	3.11065	3.90183	4.14558	0.137691	0.326643	0.565864	4.48575	4.48575
		0.750166	2.52387	4.08897	1.39601	3.11065	3.90183	4.14558	0.137691	0.326643	0.565864	4.48575	4.48575
		0.770556	2.25138	3.93148	1.39849	3.10678	3.84409	2.80612	0.137727	0.325063	0.562848	4.21272	4.21272
		Dynamic
		0.750166	2.52387	4.08897	1.39601	3.11065	3.90183	4.14558	0.137691	0.326643	0.565864	4.48575	4.48575
		0.750166	2.52387	4.08897	1.39601	3.11065	3.90183	4.14558	0.137691	0.326643	0.565864	4.48575	4.48575
		0.755248	1.30602	4.29639	1.50597	2.10287	2.34498	2.83947	0.138673	0.326876	0.488556	3.30055	3.30055
	VSTARM	1-period ahead
		s	p	ip	u	TS	PS	R	DeltaTS	DeltaPS	DeltaR	Loss	Losscheck
		0.750166	2.52387	4.08897	1.39601	3.11065	3.90183	4.14558	0.137691	0.326643	0.565864	4.48575	4.48575
		0.750166	2.52387	4.08897	1.39601	3.11065	3.90183	4.14558	0.137691	0.326643	0.565864	4.48575	4.48575
		0.759242	2.23864	3.91439	1.39766	3.10616	3.8392	2.80613	0.141039	0.335368	0.562852	4.19915	4.19915
		Dynamic
		0.750166	2.52387	4.08897	1.39601	3.11065	3.90183	4.14558	0.137691	0.326643	0.565864	4.48575	4.48575
		3.632e+18	2.91707e+19	2.8297e+19	1.62052e+18	1.5446e+18	1.76893e+18	2.42831e+19	1.63166e+18	3.95411e+17	4.92071e+18	3.57119e+19	3.57119e+19
		0.628812	1.1937	3.75662	1.28626	1.43471	1.44579	2.5473	0.121275	0.264085	0.449111	2.92907	2.92907
	VSTARV	1-period ahead
		s	p	ip	u	TS	PS	R	DeltaTS	DeltaPS	DeltaR	Loss	Losscheck
		0.750166	2.52387	4.08897	1.39601	3.11065	3.90183	4.14558	0.137691	0.326643	0.565864	4.48575	4.48575
		0.750166	2.52387	4.08897	1.39601	3.11065	3.90183	4.14558	0.137691	0.326643	0.565864	4.48575	4.48575
		1.74507	1.71103	3.69331	1.34614	2.9629	3.78254	2.88082	0.162981	0.956463	0.563909	3.62108	3.62108
		Dynamic
		0.750166	2.52387	4.08897	1.39601	3.11065	3.90183	4.14558	0.137691	0.326643	0.565864	4.48575	4.48575
		0.750166	2.52387	4.08897	1.39601	3.11065	3.90183	4.14558	0.137691	0.326643	0.565864	4.48575	4.48575
		0.757608	1.36261	3.91074	1.11606	1.85656	2.00698	2.15995	0.168572	0.393266	0.462721	2.94139	2.94139
	VSTARP	1-period ahead
		s	p	ip	u	TS	PS	R	DeltaTS	DeltaPS	DeltaR	Loss	Losscheck
		0.750166	2.52387	4.08897	1.39601	3.11065	3.90183	4.14558	0.137691	0.326643	0.565864	4.48575	4.48575
		0.750166	2.52387	4.08897	1.39601	3.11065	3.90183	4.14558	0.137691	0.326643	0.565864	4.48575	4.48575
		0.753865	2.24163	3.91259	1.39738	3.10749	3.84778	2.80613	0.140499	0.318771	0.562852	4.20186	4.20186
		Dynamic
		0.750166	2.52387	4.08897	1.39601	3.11065	3.90183	4.14558	0.137691	0.326643	0.565864	4.48575	4.48575
		1212810100398490	6193932426368920	7299936372479140	610773559765973	2339410210618350	2808432416131100	173205598096724	1215807238781180	1313594383006290	6.43463e+13	6869052241113430	6869052241113430
		0.654751	1.24638	3.69363	1.30925	1.77708	1.90533	2.33742	0.171249	0.21745	0.45828	3.01392	3.01392
	VSTARC	1-period ahead
		s	p	ip	u	TS	PS	R	DeltaTS	DeltaPS	DeltaR	Loss	Losscheck
		0.750166	2.52387	4.08897	1.39601	3.11065	3.90183	4.14558	0.137691	0.326643	0.565864	4.48575
		0.750166	2.52387	4.08897	1.39601	3.11065	3.90183	4.14558	0.137691	0.326643	0.565864	4.48575
		0.761345	2.30019	3.92962	1.38691	3.10985	3.84522	3.02086	0.137289	0.317438	0.607999	4.2951
		Dynamic
		0.750166	2.52387	4.08897	1.39601	3.11065	3.90183	4.14558	0.137691	0.326643	0.565864	4.48575
		0.750371	2.52348	4.08959	1.39613	3.11147	3.89902	4.14504	0.137382	0.327138	0.565993	4.4856
		0.667542	2.05253	3.4116	1.09445	0.559859	0.480385	2.326	0.18676	0.201172	0.827249	3.97423

## Sheet: VAR control
VAR: use ModelDatDynamicControl																ys1c								ysdc								yy
Results
	std_inf	std_un	std_changeint	loss												s	p	ip	u	TS	PS	R		s	p	ip	u	TS	PS	R		s	p	ip	u	TS	PS	R
1-period ahead	2.25138	1.39849	0.137727	4.21272												1.11	11.6517	1.41123	-0.226667	4.20751	1.58223	10.94		1.11	11.6517	1.41123	-0.226667	4.20751	1.58223	10.94		1.11	11.6517	1.41123	-0.226667	4.20751	1.58223	10.94
dynamic	1.30602	1.50597	0.138673	3.30055												1.02386	11.8989	0.0566102	-0.219419	4.22437	1.7465	8.14018		1.02386	11.8989	0.0566102	-0.219419	4.22437	1.7465	8.14018		1.1	12.4578	1.26343	-0.323333	4.20877	1.55687	11.43
																0.55291	10.9765	-0.999036	-0.0465534	4.22794	1.82177	8.27884		0.506608	10.4792	-1.58305	0.000122327	4.25309	2.02122	5.76734		0.68	11.9095	1.01531	-0.22	4.20191	1.50524	13.77
kt	3.8802			SteadyVar =												1.54392	11.4493	-0.880641	-0.229821	4.24677	1.75314	10.325		1.4422	10.1826	-1.98881	-0.149717	4.32151	2.28594	4.26394		1.61	11.9344	0.16667	-0.32	4.23323	1.58857	13.18
																1.64201	10.7005	-1.63386	-0.0999105	4.09541	1.84738	9.97808		1.55225	9.16185	-2.18305	-0.087291	4.21059	2.5478	3.33407		1.73	11.3465	-0.23919	-0.22	4.07738	1.62823	13.78
pt	9.9188			2.3865												1.21778	12.4424	-0.280166	0.178568	4.04649	1.622	10.6994		1.1305	10.5331	-0.383643	0.125382	4.21155	2.5324	3.008		1.29	12.9726	0.86457	0.08	4.0317	1.44212	13.82
	-16.1428			5.843												0.751743	11.3752	-1.2296	0.21743	4.04187	1.77307	9.88462		0.68484	9.25537	-0.627121	0.0689371	4.25504	2.83687	2.04925		0.85	12.0965	0.32775	0.0833333	4.02174	1.52836	14.13
	-2.5982			0.9401												1.65423	10.4161	-2.78452	0.29926	4.24788	1.89352	10.4595		1.59255	7.95454	-1.70155	0.0676221	4.5183	3.162	1.78819		1.81	11.5596	-0.31553	0.0866667	4.21597	1.50556	17.19
	-25.2864			0.7455												3.32879	9.44943	-2.84666	0.82813	4.2685	1.83686	13.2369		3.24458	6.32492	-1.62074	0.532853	4.6176	3.44481	2.17376		3.43	10.1924	-1.24247	0.69	4.24777	1.58478	17.61
	-17.1453			8.0787												2.98915	9.57232	-3.31146	1.19895	4.28819	1.49574	13.968		2.93659	6.23567	-1.14256	0.763386	4.70494	3.28368	3.06243		2.92	9.06467	-4.40755	1.29333	4.30235	1.66798	10.98
	15.6277			4.8734												2.60055	8.93887	-5.90199	1.42322	4.22854	1.46548	8.62945		2.6819	6.54605	-1.57382	0.74459	4.65595	2.96522	3.6375		2.62	9.08168	-5.59365	1.39667	4.22455	1.41703	9.47
	-1.7872			4.9585												1.84953	9.85363	-6.84217	1.65523	4.19445	1.57182	7.28158		1.96012	7.72652	-2.14823	0.891947	4.64325	2.99465	3.93498		1.89	10.1507	-6.20079	1.6	4.18616	1.47104	9.03
	0															1.52497	8.62227	-6.41999	1.6024	4.10883	1.63815	6.36813		1.6403	6.59488	-1.8112	0.797756	4.57963	3.03575	3.60569		1.6	9.17306	-5.23076	1.5	4.09345	1.45128	9.61
	0															1.75618	8.35713	-5.13038	1.41439	4.11952	1.68778	7.2486		1.85296	6.1918	-0.957064	0.601672	4.62053	3.15185	3.80255		1.84	8.9724	-3.80193	1.3	4.10235	1.47903	10.87
	0															1.66961	9.95388	-4.70559	1.437	4.05717	1.71745	8.47262		1.75107	7.60922	-0.889521	0.611374	4.59196	3.27362	4.23972		1.77	10.6908	-3.11449	1.3	4.0366	1.46743	12.81
	0															1.77095	9.13333	-3.70763	1.50675	3.96094	1.90943	9.40997		1.83596	6.52352	-0.219831	0.66608	4.53618	3.60163	4.07001		1.92	10.2275	-1.34521	1.30333	3.93041	1.53821	15.85
	0															2.55306	9.97441	-3.41417	1.22085	3.90803	1.99081	12.1192		2.58338	6.81595	-0.422246	0.376788	4.54208	3.94488	4.38996		2.71	11.1265	-0.92675	1.00667	3.87587	1.59994	18.9
	0															2.24451	9.40058	-3.60336	1.45397	3.70696	1.63749	14.522		2.25744	5.71301	-0.741717	0.570201	4.40881	3.86985	4.81412		2.35	10.175	-1.93133	1.31	3.68535	1.37475	19.08
	0															1.91519	10.562	-2.7966	1.24719	3.72273	1.56527	14.8581		1.95998	6.7543	0.662224	0.257749	4.48072	3.93091	5.47668		1.94	10.7441	-2.40338	1.21333	3.71765	1.50348	15.93
																2.14931	10.9524	-2.51368	1.2995	3.77593	1.64712	12.0777		2.27265	7.57802	2.06691	0.160994	4.56186	3.91964	5.73567		2.21	11.398	-1.55171	1.21667	3.7635	1.49596	14.7
Kt	0.087083	-0.383357	-0.0106287	-0.495483	-0.184759	0.183492	0.82448	0	0	0	0	0	0	0		1.3365	11.5075	-1.7435	1.17491	3.81885	2.12346	10.8158		1.49107	8.28949	3.11073	-0.0361916	4.63462	4.38331	5.67661		1.45	12.3407	0.05552	1.02	3.7956	1.84077	15.72
	-0.0838805	0.376266	0.0103566	0.490396	0.182479	-0.181586	-0.818045	0	0	0	0	0	0	0		2.28445	11.3545	0.53624	1.54927	3.70167	1.87905	11.3669		2.42961	7.93286	5.04636	0.320908	4.55997	4.26005	5.44534		2.45	12.5699	3.16024	1.32333	3.66775	1.46672	18.52
Pt																1.80915	11.5889	2.88041	1.50524	3.72455	1.76986	13.4464		1.92224	7.64994	6.80177	0.27967	4.64378	4.4075	5.26678		1.94	12.5495	4.95435	1.32667	3.69774	1.44397	19.1
4.27183	-1.52069	-0.895647	-0.0115288	-3.78699	3.41314	0.583	0	0	0	0	0	0	0			1.38006	10.2809	4.56744	1.1937	3.73164	1.73932	13.8576		1.50362	6.11738	8.57811	-0.0885615	4.70621	4.53998	5.19719		1.5	11.1614	6.46854	1.03	3.70707	1.44059	19.04
-1.52069	3.56078	0.147762	-1.67307	0.129147	-0.112334	-0.0973424	0	0	0	0	0	0	0			0.851551	10.922	4.83091	1.3404	3.77536	1.48545	14.4305		0.997524	6.63974	9.08822	-0.0125121	4.80239	4.41179	5.86722		0.93	11.4979	6.07431	1.23333	3.75929	1.29007	17.82
-0.895647	0.147762	0.223907	0.499049	1.1089	-0.999737	-0.112458	0	0	0	0	0	0	0			1.01617	9.92178	2.75987	1.52378	3.81048	1.53762	13.1121		1.21009	5.81383	7.55059	0.077733	4.87525	4.47142	6.09092		1.08	10.3903	3.77156	1.43667	3.7974	1.37865	15.87
-0.0115288	-1.67307	0.499049	16.1711	5.20997	-4.88228	0.942341	0	0	0	0	0	0	0			2.40582	7.53428	0.598227	1.84124	3.71839	1.55182	11.875		2.64446	3.68183	5.74741	0.321798	4.81065	4.44587	6.5796		2.48	8.07881	1.77394	1.74	3.70319	1.36707	15.08
-3.78699	0.129147	1.1089	5.20997	6.32822	-5.69702	-0.269312	0	0	0	0	0	0	0			3.23241	7.66916	-1.53481	2.18099	3.86331	1.43763	12.1179		3.49625	3.97702	3.58921	0.626976	4.98034	4.31463	7.83022		3.26	7.87169	-1.09751	2.14333	3.85766	1.36892	13.31
3.41314	-0.112334	-0.999737	-4.88228	-5.69702	5.15931	0.218588	0	0	0	0	0	0	0			2.52923	7.10471	-3.37498	2.40231	3.91469	1.63472	10.6084		2.83995	3.8577	1.9213	0.805391	5.03703	4.37297	8.63864		2.57	7.40401	-2.72876	2.34667	3.90633	1.53317	12.37
0.583	-0.0973424	-0.112458	0.942341	-0.269312	0.218588	1.27517	0	0	0	0	0	0	-1			2.88294	6.23108	-5.34028	2.55517	3.88046	1.67772	9.89031		3.21448	3.28689	-0.360519	0.967048	5.00449	4.31428	9.2233		2.96	6.79679	-4.11883	2.45	3.86467	1.48578	13.22
0	0	0	0	0	0	0	0	0	0	0	0	0	0			3.05836	6.59827	-3.21862	2.8784	3.85205	1.52181	10.8204		3.37969	3.67669	0.978497	1.34743	4.98481	4.16007	9.89619		3.15	7.27099	-1.76612	2.75333	3.83328	1.29357	14.78
0	0	0	0	0	0	0	0	0	0	0	0	0	0			2.57188	5.86915	-4.10902	2.94964	3.75683	1.55806	11.7366		2.87857	2.8639	-0.707398	1.48335	4.90306	4.24733	10.0886		2.64	6.36923	-3.02928	2.85667	3.74287	1.38839	14.68
0	0	0	0	0	0	0	0	0	0	0	0	0	0			2.84084	5.89327	-4.55442	3.25439	3.86072	1.74678	11.9518		3.15508	2.96085	-1.59286	1.82832	5.01429	4.435	10.4968		2.91	6.40097	-3.45824	3.16	3.84655	1.57453	14.94
0	0	0	0	0	0	0	0	0	0	0	0	0	0			2.87438	6.42103	-5.52553	3.33924	3.86269	1.36987	12.0467		3.1948	3.54025	-3.01219	1.9598	5.02313	4.06642	10.6727		2.93	6.82934	-4.64393	3.26333	3.85129	1.23134	14.45
0	0	0	0	0	0	0	0	0	0	0	0	0	0			2.41584	5.40133	-6.4274	3.55423	3.79883	1.48438	11.3778		2.75068	2.64876	-4.2401	2.21671	4.96136	4.16037	10.4797		2.48	5.87232	-5.41047	3.46667	3.78569	1.32458	14.15
0	0	0	0	0	0	0	0	0	0	0	0	0	0			3.09234	6.49587	-6.75659	3.70775	3.95461	1.34569	11.3948		3.43271	3.7947	-5.01577	2.42779	5.12071	4.02964	10.5381		3.12	6.69893	-6.31815	3.67	3.94894	1.27679	12.59
0	0	0	0	0	0	-1	0	0	0	0	0	0	1			3.50068	5.70298	-7.27463	3.68605	3.99013	1.30881	9.71743		3.86873	3.27935	-5.67607	2.44391	5.14788	3.91202	10.0565		3.51	5.77138	-7.12695	3.67333	3.98822	1.28561	10.12
																3.8482	6.69682	-7.68361	4.04736	3.85387	1.40922	8.07182		4.24474	4.63092	-6.27225	2.85465	4.994	3.88985	9.86747		3.9	7.07708	-6.86257	3.97667	3.84326	1.2802	10.31
																3.97197	7.89119	-7.82886	4.34556	3.90702	1.41889	7.63456		4.35862	5.85416	-7.15548	3.25589	5.03961	3.897	9.05338		4.02	8.2438	-7.06752	4.28	3.89718	1.29926	9.71
G		ctildat														3.44863	8.61781	-7.33506	4.76709	3.94202	1.45085	6.54847		3.83117	6.62069	-7.258	3.77337	5.06749	3.92867	7.72663		3.51	9.0683	-6.36239	4.68333	3.92945	1.29801	9.2
0.0231444		0.39572														3.7014	8.11168	-7.26125	4.79394	3.92361	1.72796	5.55397		4.07351	6.05374	-7.80277	3.90154	5.04788	4.25057	6.03831		3.78	8.68866	-6.01547	4.68667	3.90751	1.53221	8.95
0.169898		0.510344														3.06776	8.32752	-3.39698	4.38859	3.84737	1.5288	5.55859		3.42433	6.09584	-4.53412	3.59692	4.97922	4.15017	4.88975		3.14	8.85784	-2.25194	4.29	3.83257	1.34888	8.68
0.366834		1.15959														3.60691	7.17177	-5.90016	4.39308	3.83321	1.65853	5.35213		3.96081	4.82305	-7.35611	3.67848	4.97524	4.36845	3.98056		3.68	7.70829	-4.74175	4.29333	3.81824	1.4765	8.51
-0.0315865		0.0468841														2.92012	8.31562	-4.33879	4.29204	3.8143	1.45345	5.75056		3.27548	5.85513	-5.98517	3.64277	4.97033	4.25709	3.79598		2.99	8.82862	-3.23116	4.19667	3.79998	1.2794	8.77
-0.00474154		0.112423														2.94303	9.31013	-2.39099	4.20504	3.85432	1.64488	5.4744		3.30528	6.77044	-4.09691	3.60867	5.02656	4.5348	3.17206		3.02	9.87514	-1.17105	4.1	3.83855	1.45318	8.8
-0.0576431		0.169498														2.19949	9.2598	-1.13568	4.11321	3.90932	1.40444	5.15132		2.56567	6.60352	-2.89663	3.56754	5.10272	4.39861	2.34674		2.28	9.85082	0.14042	4.00333	3.89283	1.20391	8.63
																2.31636	10.44	-0.405457	4.13446	3.87224	1.44923	4.93423		2.68706	7.65811	-2.16465	3.63224	5.09104	4.5556	1.63443		2.41	11.1274	1.07867	4.00667	3.85305	1.21602	8.98
																1.5229	10.4193	1.23613	3.45616	3.91169	1.42309	4.74268		1.89284	7.44218	-0.542991	2.99597	5.16329	4.67355	0.644555		1.63	11.2055	2.93359	3.31	3.88975	1.15635	9.37
Atildat																1.56081	10.8242	3.42556	3.54538	3.89283	1.50612	5.27411		1.92717	7.58938	1.6534	3.12048	5.18562	4.93251	0.148361		1.66	11.5523	4.99777	3.41	3.87251	1.25906	9.56
0.864101	-0.0107785	-0.00544368	-0.00423293	-0.00940171	0.0116186	-0.0192739										2.01282	10.2293	5.37467	3.24263	3.88193	1.53051	5.25095		2.38779	6.82295	3.83583	2.82895	5.21794	5.10701	0		2.11	10.9427	6.91502	3.11	3.86202	1.28846	9.45
-0.0946479	0.86412	0.00778555	0.0967527	0.0621852	-0.0594229	-0.126086										1.62948	10.2396	7.33779	2.83354	3.89953	1.36591	5.56875		2.01682	6.70552	6.06185	2.42714	5.2806	5.07838	0.00307506		1.72	10.9041	8.77257	2.71	3.88099	1.14046	9.48
-0.474377	0.0444055	0.925656	0.217665	0.0135844	-0.032438	-0.433582										1.89627	9.48163	8.2645	2.52761	3.91642	1.33732	5.7221		2.30087	5.88279	7.33263	2.11758	5.34263	5.16131	0.176926		1.98	10.0963	9.59167	2.41333	3.89927	1.12877	9.34
0.0357284	-0.0193165	-0.0069654	0.967703	-0.0118529	0.00743809	0.0458747										1.85135	10.1554	9.72188	2.32401	3.95821	1.40304	6.07176		2.27555	6.54836	9.15645	1.90532	5.42849	5.31349	0.804028		1.93	10.7328	10.9685	2.21667	3.9421	1.20715	9.47
-0.0169299	-0.00748679	0.00267347	0.0282107	0.990702	0.00691153	0.00264647										1.89807	10.6865	9.72876	2.03182	3.84731	1.43951	6.01987		2.34126	7.10936	9.49616	1.60515	5.36021	5.41646	1.16155		1.98	11.288	11.0274	1.92	3.83053	1.23545	9.56
-0.016297	0.0111279	-0.0112491	-0.014485	-0.0150971	1.00384	0.043326										1.46825	9.80411	10.9223	1.8349	3.58982	1.35513	6.05778		1.92393	6.23499	10.906	1.40858	5.14612	5.40175	1.42361		1.55	10.4042	12.218	1.72333	3.57307	1.15153	9.59
																1.3811	9.80756	10.6019	1.83435	3.68013	1.27254	6.5008		1.84678	6.24885	10.7509	1.41148	5.27987	5.38445	2.05779		1.46	10.3868	11.8525	1.72667	3.66396	1.07602	9.91
Astar								cstar								1.40772	9.77601	9.90791	1.74229	3.87801	1.53435	6.73507		1.88301	6.24661	10.2006	1.32385	5.52038	5.70109	2.54096		1.49	10.38	11.212	1.63	3.86116	1.32943	10.29
0.866117	-0.0196511	-0.00568967	-0.0157006	-0.0136778	0.0158654	-0.000191816		0.485525								0.7559	9.6346	9.79073	1.43446	3.82476	1.33821	7.11836		1.23623	6.10997	10.15	1.02639	5.51072	5.56631	3.00627		0.83	10.1785	10.9652	1.33333	3.80958	1.15365	10.32
-0.0798526	0.798988	0.00597975	0.012571	0.0307949	-0.0282479	0.013992		1.16958								1.12274	9.00795	9.30812	1.25576	3.78465	1.30844	7.28974		1.61214	5.54143	9.77821	0.854007	5.51177	5.57501	3.51094		1.21	9.64851	10.6912	1.13667	3.76677	1.09111	11.06
-0.442432	-0.0962229	0.921757	0.0359047	-0.0541914	0.0348729	-0.131134		2.58298								2.17063	7.74458	8.28388	1.53467	3.69094	1.32352	8.23293		2.65799	4.2434	8.70122	1.15278	5.46305	5.66185	4.26848		2.24	8.25378	9.38331	1.44	3.67673	1.15076	11.23
0.0329777	-0.00720755	-0.00662968	0.983353	-0.00601704	0.00164223	0.0198322		-0.0756778								1.77632	7.79837	7.26428	1.53024	3.64348	1.30876	8.88865		2.27402	4.38323	7.79961	1.15361	5.45565	5.6718	5.3701		1.84	8.26582	8.27357	1.44333	3.63043	1.15016	11.64
-0.0173428	-0.00566909	0.00272387	0.0305601	0.991579	0.0060415	-0.00126284		0.0940252								1.83153	8.16277	5.69615	1.31281	3.72875	1.3076	9.20583		2.33896	4.86025	6.31141	0.945447	5.57817	5.67969	6.20368		1.88	8.51857	6.46436	1.24667	3.71882	1.18688	11.3
-0.0213167	0.0332258	-0.0106365	0.0140761	-0.00444704	0.993261	-0.00419958		-0.0541692								2.12568	7.18913	5.03809	1.38319	3.5778	1.24732	8.93917		2.64751	4.08386	5.75946	1.02462	5.45823	5.58904	6.81151		2.15	7.36766	5.42357	1.35	3.57281	1.18675	9.99
0.087083	-0.383357	-0.0106287	-0.495483	-0.184759	0.183492	0.82448		3.8802								1.87409	8.47736	5.04732	1.18869	3.72233	1.21481	8.31064		2.41739	5.70107	5.90927	0.839426	5.62344	5.46453	7.60931		1.9	8.66754	5.45794	1.15333	3.71703	1.15028	9.43
																1.82715	7.7283	4.67894	1.28786	3.8479	1.13454	7.39259		2.37864	5.22692	5.42612	0.974131	5.7661	5.30007	7.66388		1.85	7.89606	5.04116	1.25667	3.84322	1.07762	8.38
0.866043	-0.019487	-0.00568338	-0.0155829	-0.0136251	0.0158213	-0.000340756		0.793142								2.05262	7.9673	2.22632	1.31102	3.6817	1.18138	6.73486		2.60601	5.72115	2.73091	1.04846	5.61318	5.26181	7.76912		2.09	8.24171	2.81881	1.26	3.67404	1.08828	8.35
-0.0803967	0.800193	0.00602598	0.0134352	0.0311823	-0.0285717	0.0128987		3.42773								1.27727	9.55942	2.05423	1.22165	3.6661	1.17098	6.6537		1.81735	7.43482	2.09648	1.03307	5.6135	5.21341	7.69927		1.32	9.8731	2.73151	1.16333	3.65735	1.06455	8.5
-0.443607	-0.0936216	0.921857	0.0377706	-0.0533551	0.034174	-0.133495		7.45863								1.98335	8.50422	1.49488	1.24398	3.73633	1.16039	6.13247		2.50691	6.44275	1.06312	1.13323	5.70156	5.18926	6.92149		2.04	8.92005	2.39272	1.16667	3.72472	1.0193	8.58
0.0330789	-0.00743153	-0.00663827	0.983193	-0.00608905	0.00170241	0.0200355		-0.4955								2.06153	7.93732	0.854887	1.32251	3.88964	1.17543	6.60769		2.56213	5.83221	-0.0843104	1.29375	5.87842	5.23687	6.66124		2.1	8.21974	1.46468	1.27	3.88176	1.07961	8.27
-0.0173276	-0.00570271	0.00272258	0.0305359	0.991568	0.00605053	-0.00123232		0.0310046								2.83752	8.72902	0.634271	1.21766	3.81462	1.14852	6.56651		3.33209	6.69709	-0.519658	1.24665	5.82364	5.20327	6.59425		2.87	8.96747	1.14912	1.17333	3.80796	1.06762	7.97
-0.0211321	0.032817	-0.0106521	0.0137829	-0.00457846	0.993371	-0.00382864		-0.820314								2.11834	7.53329	0.361114	1.41987	3.82367	1.08567	6.16225		2.60984	5.59933	-0.945044	1.50201	5.85165	5.12377	6.30644		2.15	7.76567	0.86285	1.37667	3.81718	1.00683	7.53
0.0838805	-0.376266	-0.0103566	-0.490396	-0.182479	0.181586	0.818045		17.1714								1.8185	8.5585	-0.766516	1.43664	3.81757	1.19726	6.08694		2.30539	6.7109	-2.22968	1.57291	5.86453	5.22176	6.28531		1.86	8.86314	-0.10876	1.38	3.80906	1.0939	7.88
																2.175	9.21906	-0.503032	1.14475	3.82081	1.15332	5.95568		2.64977	7.37801	-2.19936	1.34149	5.89051	5.19519	5.80938		2.22	9.5494	0.21021	1.08333	3.81159	1.04124	7.9
7.41187e-05	-0.000164118	-6.29663e-06	-0.000117729	-5.27646e-05	4.40981e-05	0.00014894										2.12264	9.94916	0.0701758	1.1513	3.8696	1.25157	5.87391		2.58507	8.08619	-1.81644	1.40381	5.96493	5.32502	5.29589		2.17	10.2968	0.82075	1.08667	3.8599	1.13363	7.92
0.000544089	-0.00120476	-4.62222e-05	-0.000864221	-0.000387334	0.000323715	0.00109333										2.29467	8.4628	-0.307967	1.16551	3.65442	1.18398	5.59942		2.74585	6.56134	-2.32216	1.46665	5.7782	5.299	4.57054		2.35	8.86896	0.56898	1.09	3.64308	1.04617	7.99
0.00117476	-0.00260124	-9.98001e-05	-0.00186597	-0.000836307	0.000698945	0.00236066										2.35823	7.45957	-0.150688	1.05034	3.76837	1.17857	6.24521		2.79589	5.46942	-2.27417	1.3959	5.92537	5.35854	4.57503		2.4	7.7662	0.51137	0.993333	3.75981	1.07454	8.05
-0.000101154	0.000223982	8.59336e-06	0.000160671	7.20108e-05	-6.01831e-05	-0.000203266										2.54491	8.59784	0.894154	1.04455	3.96852	1.23607	6.75393		2.98147	6.61659	-1.1254	1.41358	6.15698	5.44671	5.01996		2.58	8.85542	1.4503	0.996667	3.96133	1.14868	8.27
-1.51845e-05	3.36225e-05	1.28997e-06	2.41188e-05	1.08098e-05	-9.03427e-06	-3.05129e-05										2.322	7.67508	1.4903	0.75186	3.9595	1.22413	6.49817		2.76061	5.74478	-0.374008	1.13768	6.17818	5.4474	4.91561		2.36	7.95402	2.09258	0.7	3.95171	1.12949	8.14
-0.000184599	0.00040875	1.56823e-05	0.000293213	0.000131415	-0.00010983	-0.000370946										2.95676	6.62279	0.687449	1.23505	3.89537	1.08671	6.85581		3.39298	4.71787	-1.08234	1.64068	6.14548	5.32963	5.26947		2.98	6.7934	1.05582	1.20333	3.89061	1.02883	7.86
0.00320244	-0.00709105	-0.000272058	-0.00508669	-0.0022798	0.00190534	0.00643522										3.09607	6.50907	-0.0112242	1.22567	3.84343	1.15748	6.87833		3.53774	4.72218	-1.5819	1.64061	6.12072	5.38129	5.7527		3.11	6.61129	0.20949	1.20667	3.84058	1.1228	7.48
																2.80282	6.55383	0.408387	1.11979	3.83643	1.32616	6.67999		3.2505	4.9308	-0.983273	1.54513	6.13695	5.50634	6.18146		2.81	6.6065	0.52211	1.11	3.83496	1.30828	6.99
																2.228	5.88651	0.399782	1.23305	3.97737	1.17822	6.33135		2.67946	4.44993	-0.878168	1.67453	6.29741	5.29822	6.49088		2.24	5.97463	0.59004	1.21667	3.97491	1.14833	6.85
																2.97564	6.30125	-0.0402636	1.24293	3.96844	1.06735	6.29974		3.42154	4.99418	-1.35892	1.7141	6.30792	5.14248	6.74753		2.99	6.40663	0.18727	1.22333	3.9655	1.03159	6.92
																2.81256	6.03956	1.28393	1.04016	3.99712	1.06783	6.23845		3.24838	4.82709	-0.139639	1.54665	6.35619	5.10855	6.7701		2.82	6.09419	1.40189	1.03	3.9956	1.04929	6.56
																3.22901	5.31593	0.840242	0.934686	4.01322	1.0309	6.12718		3.65767	4.22758	-0.643647	1.47284	6.38953	5.02386	6.89255		3.23	5.32321	0.85595	0.933333	4.01302	1.02843	6.17
																2.75679	6.38687	0.735003	1.02739	4.01171	1.09073	6.18355		3.17954	5.44557	-0.795886	1.59646	6.40263	5.02366	7.27921		2.75	6.337	0.62732	1.03667	4.0131	1.10766	5.89
																2.89162	6.36495	1.39029	1.05143	4.04459	1.06277	5.488		3.30966	5.59934	-0.180834	1.65154	6.44674	4.92017	7.02735		2.9	6.42645	1.52308	1.04	4.04287	1.0419	5.85
																2.9053	5.56857	1.41862	0.963389	4.09836	1.11695	5.40506		3.30489	4.85345	-0.38109	1.61077	6.51555	4.94397	6.71111		2.92	5.67645	1.65154	0.943333	4.09535	1.08035	6.04
																2.71651	6.43657	1.06033	0.678731	4.20902	1.51361	5.89486		3.09519	5.71929	-0.964817	1.37225	6.64419	5.33308	6.74988		2.74	6.60904	1.43272	0.646667	4.20421	1.4551	6.91
																2.54016	3.8355	0.658784	0.649781	4.26846	1.17959	6.43693		2.89571	3.05437	-1.57264	1.38582	6.72605	5.01984	6.60369		2.54	3.83432	0.65624	0.65	4.2685	1.17999	6.43
																2.48156	6.59401	2.9866	0.627237	3.99635	0.980911	7.03172		2.83338	5.908	0.854156	1.3779	6.47086	4.7838	7.41453		2.46	6.43571	2.64481	0.656667	4.00077	1.03462	6.1
																2.09129	6.65445	3.36172	0.675217	4.07331	1.02136	5.75376		2.44936	6.18991	1.44716	1.42979	6.55727	4.73248	6.96563		2.1	6.71837	3.49974	0.663333	4.07153	0.999674	6.13
																1.81234	7.0515	3.82116	0.394103	4.26045	1.33246	5.60691		2.15002	6.58153	1.73887	1.18449	6.76152	5.03316	6.39662		1.83	7.18115	4.10109	0.37	4.25683	1.28847	6.37
																1.99481	6.49574	4.15326	0.407713	4.26511	1.30915	5.76157		2.30957	5.95893	1.91259	1.23079	6.7876	5.0272	5.88715		2.02	6.68066	4.55253	0.373333	4.25995	1.24641	6.85
																2.13123	7.31234	5.25322	0.288638	4.33884	1.1339	6.35099		2.42336	6.66512	2.91308	1.13597	6.88735	4.89201	5.68898		2.14	7.37673	5.39225	0.276667	4.33704	1.11205	6.73
																1.93648	7.31084	5.32417	0.198455	4.22621	1.00916	5.99573		2.22179	6.67282	3.14307	1.04458	6.79781	4.76546	5.25789		1.95	7.41011	5.5385	0.18	4.22343	0.975483	6.58
																1.78044	7.86719	6.24138	0.113357	4.18227	1.13795	5.88499		2.05556	7.20667	4.18115	0.958221	6.7789	4.90386	4.91812		1.8	8.01076	6.55136	0.0866667	4.17827	1.08925	6.73
																1.64783	4.96945	6.10491	0.0372373	4.2737	1.07598	5.83004		1.91007	4.25035	4.14545	0.878903	6.89808	4.86625	4.4795		1.68	5.2056	6.6148	-0.00666667	4.26711	0.995863	7.22
																2.74049	6.8773	7.65977	0.0993372	4.22221	1.2412	7.31098		2.98462	6.02541	5.75732	0.937184	6.87962	5.08741	5.24929		2.74	6.87374	7.65207	0.1	4.22231	1.24241	7.29
																2.2428	7.38979	7.76891	-0.100493	4.28454	0.913314	6.81115		2.49403	6.63631	6.28356	0.69935	6.96627	4.72769	5.29503		2.24	7.36921	7.72447	-0.0966667	4.28511	0.920297	6.69
																2.4447	5.7934	7.10005	-0.172453	4.32948	1.1243	6.10895		2.69882	5.14442	5.92901	0.59598	7.03298	4.89674	5.08607		2.46	5.90571	7.34255	-0.193333	4.32635	1.08619	6.77
																2.81	9.47707	7.71743	-0.189996	4.31453	0.979079	6.82989		3.05121	8.80336	6.61745	0.565488	7.04395	4.75474	5.57722		2.81	9.47709	7.71747	-0.19	4.31453	0.979073	6.83
																2.43541	7.13869	6.4107	-0.149776	4.20868	0.931246	5.51761		2.67478	6.54392	5.53002	0.578171	6.95924	4.6694	4.58988		2.46	7.31919	6.80042	-0.183333	4.20364	0.870007	6.58
																1.98924	8.12466	6.70951	-0.161985	4.17914	0.940843	6.11518		2.20874	7.43974	5.78956	0.558127	6.95748	4.70463	4.6145		2	8.20363	6.88002	-0.176667	4.17693	0.914049	6.58
																2.00396	7.18676	6.40394	-0.434463	4.30101	1.0523	5.74493		2.21692	6.51352	5.64558	0.258232	7.10372	4.80534	4.26476		2.03	7.37791	6.81665	-0.47	4.29567	0.98745	6.87
																1.82497	7.93325	5.7562	-0.242825	4.12524	0.958443	6.44073		2.02174	7.17201	5.02599	0.431148	6.95672	4.73906	4.47377		1.84	8.04356	5.99437	-0.263333	4.12217	0.921017	7.09
																2.15145	7.78641	5.31706	-0.417708	4.25212	1.1281	6.2766		2.3429	7.02131	4.77545	0.221237	7.10955	4.90605	4.31257		2.18	7.99596	5.76951	-0.456667	4.24627	1.05701	7.51
																1.96734	7.84736	4.72458	-0.419075	4.18283	1.0042	6.77094		2.14512	6.9929	4.2527	0.192212	7.07	4.81226	4.37448		1.99	8.0137	5.08373	-0.45	4.17819	0.947768	7.75
																1.93528	7.39489	4.28369	-0.209599	4.19158	1.0161	6.94199		2.10674	6.50266	3.99103	0.361907	7.1071	4.83653	4.42922		1.96	7.57634	4.67547	-0.243333	4.18652	0.95454	8.01
																2.00762	7.7839	3.76896	-0.406124	4.2208	1.12873	7.22305		2.17253	6.84801	3.64487	0.123944	7.16493	4.96361	4.57525		2.03	7.94818	4.12367	-0.436667	4.21621	1.07299	8.19
																1.73808	8.74641	2.78471	-0.400085	4.15789	1.00272	7.35291		1.89916	7.79052	2.85619	0.083956	7.12944	4.84257	4.7032		1.76	8.90732	3.13213	-0.43	4.1534	0.948123	8.3
																1.38987	8.87496	2.27587	-0.482218	4.21274	1.09989	7.04833		1.54762	7.90766	2.53207	-0.0451935	7.21067	4.94006	4.43612		1.42	9.09611	2.75337	-0.523333	4.20657	1.02486	8.35
																1.47024	8.70596	2.12197	-0.462404	4.27489	1.20286	7.0421		1.61966	7.67805	2.48003	-0.0672491	7.30082	5.06164	4.21071		1.51	8.99783	2.75216	-0.516667	4.26675	1.10384	8.76
																1.60079	8.11368	2.39123	-0.356484	4.23528	1.11179	7.42573		1.73836	6.97243	2.80518	-0.00159381	7.29203	5.01157	4.1363		1.64	8.40153	3.01275	-0.41	4.22724	1.01413	9.12
																1.25616	8.02745	1.56916	-0.557144	4.0585	1.08209	7.89768		1.38665	6.79339	2.11334	-0.25133	7.14623	5.01828	4.31223		1.29	8.2759	2.10559	-0.603333	4.05157	0.997802	9.36
																1.33293	7.03653	1.52761	-0.746069	4.09319	1.04223	8.24813		1.46263	5.75988	2.28172	-0.498231	7.20996	4.9966	4.65456		1.37	7.30869	2.11523	-0.796667	4.08559	0.949894	9.85
																1.57312	8.45712	1.35801	-0.566957	4.20846	1.04184	9.11049		1.70061	7.1262	2.28335	-0.375567	7.35427	5.0182	5.44441		1.59	8.58106	1.62562	-0.59	4.205	0.999793	9.84
																1.83023	7.62088	0.58255	-0.542698	3.96942	1.16497	8.52353		1.96903	6.37823	1.83345	-0.421586	7.13667	5.10608	5.50907		1.86	7.83945	1.05447	-0.583333	3.96332	1.09081	9.81
																1.91474	7.36426	0.607029	-0.455843	4.07992	1.2005	8.87073		2.05204	6.11887	1.95529	-0.385622	7.2697	5.13577	5.95641		1.93	7.47627	0.84887	-0.476667	4.0768	1.16249	9.53
																2.03812	7.18237	-0.277327	-0.553787	3.86342	1.18115	8.72672		2.18282	6.03192	1.25657	-0.541344	7.06932	5.07028	6.39365		2.05	7.26957	-0.08904	-0.57	3.86098	1.15157	9.24
																1.61263	7.44587	0.265246	-0.55327	3.78852	1.17364	8.6714		1.76272	6.40308	1.90297	-0.59003	7.00637	5.00577	6.90845		1.62	7.5	0.38212	-0.563333	3.78701	1.15528	8.99
																1.58439	7.20097	0.0514317	-0.435363	3.85254	1.22721	8.34553		1.73877	6.28315	1.72751	-0.513415	7.07774	4.99015	7.17107		1.6	7.31556	0.29885	-0.456667	3.84934	1.18834	9.02
																1.8794	6.36384	-0.430478	-0.435528	3.68866	1.2577	8.38181		2.02916	5.50187	1.12239	-0.538635	6.92078	4.97404	7.37933		1.89	6.44169	-0.2624	-0.45	3.68648	1.23129	8.84
																1.97195	6.22679	-0.0627565	-0.345996	3.95356	1.24127	8.6343		2.11988	5.44537	1.38616	-0.473257	7.18905	4.90039	7.92081		1.97	6.21247	-0.09368	-0.343333	3.95396	1.24613	8.55
																1.88858	6.47858	0.0198226	-0.33473	4.01257	1.31217	8.3887		2.04094	5.84853	1.42134	-0.487773	7.24509	4.88381	8.29853		1.89	6.489	0.04231	-0.336667	4.01228	1.30864	8.45
																1.50906	7.08323	-0.943389	-0.328712	3.71896	1.25631	8.18922		1.65943	6.56224	0.286518	-0.493436	6.94649	4.75235	8.44194		1.51	7.09016	-0.92843	-0.33	3.71877	1.25395	8.23
																1.61971	6.81095	0.35103	-0.409293	3.71507	1.25469	7.79549		1.76648	6.38597	1.36903	-0.578803	6.9352	4.67832	8.29928		1.63	6.88647	0.51409	-0.423333	3.71296	1.22906	8.24
																1.55166	7.25843	0.637057	-0.505286	3.72	1.27577	7.91969		1.68792	6.85342	1.34519	-0.668276	6.93392	4.65638	8.27784		1.56	7.31965	0.76923	-0.516667	3.71829	1.255	8.28
																1.25	6.33357	0.364762	-0.296349	3.75948	1.25819	7.82782		1.37904	5.9553	0.823121	-0.45548	6.96594	4.59589	8.11492		1.26	6.407	0.5233	-0.31	3.75743	1.23328	8.26
																1.80639	6.28017	1.38655	-0.298408	3.75531	1.27677	8.02408		1.92844	5.91151	1.6109	-0.452933	6.95416	4.58027	8.1811		1.81	6.30666	1.44375	-0.303333	3.75457	1.26778	8.18
																1.78417	6.62745	1.63047	-0.488715	3.85291	1.24474	8.03825		1.90471	6.30637	1.70678	-0.643969	7.04164	4.50114	8.28996		1.79	6.67022	1.72282	-0.496667	3.85172	1.23023	8.29
																1.83782	6.5657	2.47705	-0.187025	3.84516	1.22748	8.05582		1.95499	6.26971	2.38244	-0.339187	7.0235	4.44573	8.28924		1.84	6.5817	2.5116	-0.19	3.84471	1.22205	8.15
																1.54278	6.23603	1.78406	0.0265172	3.88593	1.22405	7.81814		1.65922	5.9837	1.5607	-0.124361	7.05212	4.39774	8.14206		1.55	6.28901	1.89846	0.0166667	3.88445	1.20607	8.13
																1.81034	6.78182	2.24538	0.236522	3.93952	1.25366	7.78244		1.92238	6.53292	1.84809	0.0923045	7.09438	4.39881	7.9928		1.82	6.85276	2.39855	0.223333	3.93754	1.22959	8.2
																2.07668	6.42466	1.4937	0.248183	3.96232	1.32057	7.53434		2.18396	6.16079	0.933706	0.110767	7.10652	4.44647	7.56408		2.09	6.52246	1.70487	0.23	3.95959	1.28738	8.11
																2.35562	6.2424	0.109793	0.539307	4.05777	1.23344	7.62088		2.45756	5.93985	-0.600866	0.408302	7.19264	4.35204	7.38313		2.36	6.27453	0.17917	0.533333	4.05687	1.22253	7.81
																2.35042	4.81009	-1.07217	0.636094	4.00934	1.28728	7.32814		2.45473	4.53085	-1.81144	0.50175	7.13241	4.37688	7.17811		2.35	4.80701	-1.07882	0.636667	4.00942	1.28833	7.31
																2.43274	3.0501	-0.644783	0.722608	3.9176	1.22261	7.46062		2.54148	2.82209	-1.38892	0.583904	7.02675	4.2715	7.53123		2.42	2.95655	-0.84677	0.74	3.92022	1.25435	6.91
																2.08594	3.97876	-1.92786	0.897616	3.94624	1.1121	7.80289		2.20459	3.87556	-2.6186	0.751271	7.03646	4.08901	8.43998		2.05	3.71493	-2.49751	0.946667	3.9536	1.20162	6.25
																2.05655	4.33199	-3.21915	1.13075	3.95373	1.14873	6.83509		2.19427	4.48882	-3.77519	0.972971	7.01541	3.99434	8.65089		2.04	4.2105	-3.48147	1.15333	3.95712	1.18995	6.12
																1.93232	3.72704	-2.92692	1.04319	3.89833	1.11661	6.44232		2.06714	3.98345	-3.69899	0.907251	6.93405	3.88442	8.47775		1.92	3.6366	-3.12219	1.06	3.90085	1.14729	5.91
																1.81721	4.29501	-2.09638	1.24317	4.02095	1.12406	6.52373		1.94497	4.60703	-3.13765	1.13631	7.03114	3.83084	8.54429		1.8	4.16865	-2.36921	1.26667	4.02448	1.16693	5.78
																1.72399	3.60402	-1.73577	1.26788	4.06401	1.14192	6.0725		1.84796	3.99249	-2.98762	1.18752	7.04687	3.78071	8.20222		1.72	3.57471	-1.79905	1.27333	4.06482	1.15186	5.9
																1.70279	3.86969	-1.37535	1.16255	4.01252	1.06669	6.37257		1.814	4.23487	-2.94264	1.11928	6.97198	3.67749	8.10825		1.69	3.77581	-1.57805	1.18	4.01514	1.09854	5.82
																1.84412	3.24272	-1.57374	1.26739	4.06176	0.99625	6.2702		1.95125	3.64091	-3.30314	1.24934	6.99607	3.56132	7.96314		1.83	3.13905	-1.79758	1.28667	4.06466	1.03142	5.66
																2.0602	3.10941	-0.74663	1.26577	4.10092	0.988178	6.3226		2.1641	3.54227	-2.61032	1.27162	7.00983	3.5079	7.99677		2.04	2.96116	-1.06673	1.29333	4.10506	1.03848	5.45
																2.04335	2.89447	-0.109563	1.36814	4.09834	0.992994	6.2187		2.1475	3.39469	-2.04925	1.39401	6.98004	3.45494	8.0501		2.02	2.72309	-0.47959	1.4	4.10313	1.05114	5.21
																2.09879	3.61277	1.04055	1.36404	4.19513	0.949511	6.05394		2.20329	4.19016	-0.972051	1.41089	7.04827	3.3486	8.07838		2.07	3.40143	0.58423	1.40333	4.20102	1.02122	4.81
																2.57319	4.29318	1.21208	1.67502	4.35423	1.05896	5.43192		2.67922	4.97118	-0.858759	1.74298	7.17664	3.3843	7.74967		2.55	4.12296	0.84454	1.70667	4.35898	1.11672	4.43
																1.83595	6.46178	0.979722	1.68823	4.14436	1.03083	4.71909		1.93712	7.18861	-1.23673	1.78599	6.93722	3.30072	7.03778		1.82	6.3447	0.72694	1.71	4.14763	1.07055	4.03
																1.94714	5.92621	1.93279	1.83422	4.17026	1.06452	3.50418		2.03862	6.64534	-0.475357	1.96628	6.9362	3.30212	5.54775		1.96	6.02064	2.13668	1.81667	4.16763	1.03248	4.06
																1.7009	5.14659	3.39714	1.83575	4.16256	1.04385	3.58683		1.76709	5.66766	0.633975	2.01485	6.9122	3.3286	4.43938		1.71	5.21339	3.54137	1.82333	4.16069	1.02119	3.98
																1.60138	5.75351	4.12931	1.82812	4.1441	0.999846	3.78954		1.65432	6.12291	1.25842	2.03068	6.88016	3.32505	3.85015		1.6	5.74339	4.10747	1.83	4.14438	1.00328	3.73
																1.78938	5.64765	3.24942	2.05116	4.31074	1.03382	3.36107		1.84142	5.95237	0.4869	2.25618	7.03263	3.37186	3.17078		1.8	5.72562	3.41777	2.03667	4.30856	1.00737	3.82
																1.90016	5.93208	2.34514	2.25676	4.27431	0.992001	3.33485		1.94518	6.10319	-0.368702	2.4664	6.98727	3.37208	2.56921		1.91	6.00431	2.5011	2.24333	4.2723	0.967494	3.76
																2.11641	5.99482	3.25733	2.1549	4.18759	0.982191	3.09484		2.15901	6.05567	0.687883	2.35772	6.89355	3.3997	1.9378		2.12	6.02118	3.31425	2.15	4.18685	0.973247	3.25
																2.01705	6.24897	2.52047	2.071	4.22472	0.98888	2.74063		2.06357	6.25678	0.196493	2.25539	6.92327	3.42363	1.51906		2.03	6.34401	2.72567	2.05333	4.22207	0.956636	3.3
																2.23785	6.70176	1.8701	2.07325	4.48163	1.0278	2.69485		2.28239	6.60537	-0.2872	2.24293	7.17644	3.49977	1.14323		2.25	6.79098	2.06274	2.05667	4.47914	0.99753	3.22
																2.02477	7.6523	2.75907	1.78078	4.25974	1.00503	2.4421		2.07012	7.47303	0.816641	1.92862	6.95184	3.5079	0.6973		2.04	7.76408	3.00041	1.76	4.25662	0.967109	3.1
																1.98765	7.25177	3.21022	1.89717	4.38589	1.01369	2.12439		2.03314	6.98349	1.47567	2.02086	7.07713	3.55076	0.16552		2.01	7.41583	3.56444	1.86667	4.38132	0.958032	3.09
																2.09249	7.7287	3.78185	1.89723	4.48461	1.05102	2.16349		2.13532	7.33973	2.22123	1.99662	7.17815	3.6361	0		2.11	7.85723	4.05936	1.87333	4.48102	1.00741	2.92
																2.2528	6.06764	4.66515	1.81712	4.43306	0.96843	1.8449		2.2988	5.61064	3.34229	1.88528	7.1283	3.58322	0		2.28	6.26729	5.09622	1.78	4.42749	0.900694	3.02
																2.34952	6.16286	4.64652	1.59764	4.44888	0.905708	2.5772		2.39323	5.59268	3.43168	1.6464	7.1488	3.56875	0.300333		2.36	6.23979	4.81262	1.58333	4.44673	0.879607	3.03
																2.11134	5.65664	3.66598	1.49848	4.45168	0.953641	2.69598		2.16594	5.09854	2.74822	1.50944	7.15195	3.61748	0.674026		2.12	5.72018	3.80318	1.48667	4.44991	0.932082	3.07
																2.09035	6.34164	3.38583	1.58953	4.51327	0.918187	2.97493		2.1541	5.80909	2.71513	1.56555	7.21236	3.57344	1.23526		2.09	6.3391	3.38035	1.59	4.51334	0.919047	2.96
																2.04036	6.27784	2.52993	1.60982	4.663	0.944905	2.58354		2.11599	5.82897	2.11099	1.55003	7.35684	3.56441	1.37787		2.05	6.3486	2.6827	1.59667	4.66103	0.920899	3
																2.25951	6.2168	2.67431	1.51766	4.73876	0.952583	2.58656		2.33623	5.77799	2.32528	1.43746	7.4287	3.55986	1.47026		2.27	6.29384	2.84065	1.50333	4.73661	0.926445	3.04
																2.09147	6.21828	2.10325	1.42165	4.58233	0.919514	2.69131		2.1682	5.78348	1.79797	1.32318	7.268	3.5158	1.62455		2.1	6.28092	2.2385	1.41	4.58058	0.898261	3.06
																2.14408	6.12111	2.53977	1.32141	4.63398	0.89003	2.77425		2.22184	5.70322	2.28216	1.20445	7.31418	3.46949	1.81885		2.15	6.16456	2.63359	1.31333	4.63277	0.875287	3.03
																1.93394	5.97627	2.78821	1.22493	4.71261	0.945792	2.82831		2.01365	5.5908	2.57697	1.09	7.38573	3.50102	2.05114		1.94	6.02073	2.88421	1.21667	4.71137	0.930708	3.09
																1.8792	5.78451	2.88792	1.32109	4.64534	0.923365	2.95551		1.95958	5.42691	2.68989	1.17162	7.31047	3.45446	2.31377		1.88	5.79037	2.90057	1.32	4.64517	0.921377	2.99
																1.82758	5.8792	2.85565	1.12664	5.02714	0.626473	2.91529		1.91103	5.58038	2.68847	0.96208	7.68172	3.11985	2.55215		1.83	5.89699	2.89406	1.12333	5.02664	0.620437	3.02
																1.85784	5.39645	3.32297	1.02962	4.87717	0.915475	2.86661		1.94137	5.13837	3.12692	0.856215	7.52048	3.37588	2.65947		1.86	5.41232	3.35723	1.02667	4.87673	0.910092	2.96
																1.95184	5.64392	3.32695	1.12749	4.73081	0.919211	3.12938		2.0347	5.42257	3.08103	0.948245	7.36188	3.3471	3.0446		1.95	5.63043	3.29783	1.13	4.73118	0.923787	3.05
																1.60668	6.3426	2.82613	1.14119	4.75358	0.957827	3.10664		1.69068	6.17867	2.54495	0.956238	7.37033	3.34417	3.24023		1.61	6.36696	2.87872	1.13667	4.7529	0.949564	3.25
																1.35124	6.67893	3.92023	1.05529	4.78888	0.895892	2.96145		1.43174	6.53061	3.53146	0.872086	7.39199	3.2558	3.08134		1.36	6.74325	4.0591	1.04333	4.78708	0.874071	3.34
																1.44433	6.20585	4.04127	0.971379	4.77842	0.926874	2.88316		1.51855	6.03423	3.5133	0.793487	7.36939	3.27666	2.80387		1.46	6.32084	4.28956	0.95	4.77521	0.887858	3.56
																1.43319	5.46406	4.91806	0.676275	4.76697	0.874689	3.2837		1.49897	5.22561	4.24047	0.504827	7.34841	3.23432	2.82009		1.45	5.58746	5.18449	0.653333	4.76353	0.832823	4.01
																1.30571	6.0248	5.61049	0.662525	4.84133	0.8502	4.06453		1.36591	5.71938	4.84787	0.491764	7.41454	3.2239	3.27315		1.31	6.05631	5.67853	0.656667	4.84045	0.839509	4.25
																1.67515	5.59668	5.43982	0.666614	4.80841	0.853483	4.05059		1.74032	5.31422	4.74767	0.48329	7.3701	3.20859	3.4317		1.68	5.63226	5.51664	0.66	4.80741	0.841412	4.26
																1.54514	6.24629	6.17914	0.569962	4.79653	0.851928	4.26014		1.61345	5.981	5.5202	0.377614	7.34624	3.18907	3.76101		1.55	6.28194	6.25612	0.563333	4.79553	0.839831	4.47
																1.34808	5.75311	5.96411	0.482939	4.76714	0.874507	4.21485		1.41857	5.50312	5.31666	0.283901	7.30438	3.19341	3.81083		1.36	5.84063	6.15309	0.466667	4.76469	0.844811	4.73
																1.38716	6.15858	6.19132	0.373871	4.8111	0.858146	4.63745		1.45485	5.87594	5.48515	0.174403	7.33778	3.17735	4.07526		1.39	6.1794	6.23628	0.37	4.81052	0.851082	4.76
																1.39344	5.84012	6.1868	0.19593	4.90035	0.902009	4.57462		1.46539	5.58807	5.52189	-0.0120719	7.41383	3.19801	4.19687		1.41	5.96166	6.44923	0.173333	4.89696	0.860773	5.29
																1.2537	5.87136	6.88277	0.0852646	4.94421	0.935314	5.1778		1.32007	5.55676	6.12123	-0.119372	7.44834	3.24386	4.49015		1.26	5.91761	6.98262	0.0766667	4.94292	0.919624	5.45
																1.47602	5.77437	6.70989	0.185431	4.79099	0.840187	5.35807		1.54591	5.47171	5.98816	-0.0273467	7.28324	3.13478	4.78013		1.48	5.80358	6.77296	0.18	4.79018	0.830277	5.53
																1.61912	4.63021	6.41422	-0.00181342	4.87767	0.910887	5.44976		1.69305	4.35367	5.72975	-0.222028	7.35687	3.18492	5.03779		1.63	4.7101	6.58672	-0.0166667	4.87544	0.883781	5.92
																1.50734	5.20669	5.77638	-0.0233479	4.89903	0.817906	6.29705		1.57979	4.90823	5.04695	-0.243609	7.3669	3.08925	5.78646		1.5	5.15282	5.66007	-0.0133333	4.90053	0.836181	5.98
																1.53255	4.70928	5.03363	0.386516	5.01845	0.865937	6.16031		1.61562	4.51052	4.41875	0.153554	7.46919	3.08712	6.1798		1.53	4.69054	4.99317	0.39	5.01897	0.872296	6.05
																1.90416	5.67569	4.88186	0.187653	4.95363	0.830821	6.18984		1.99044	5.53332	4.25077	-0.0454598	7.38718	3.01425	6.45028		1.9	5.64514	4.81589	0.193333	4.95449	0.841187	6.01
																1.68835	5.69197	4.47834	0.19892	4.91565	0.818813	5.92866		1.77696	5.60872	3.80583	-0.0307004	7.33066	2.96158	6.41601		1.69	5.70409	4.50451	0.196667	4.91532	0.814701	6
																1.59078	5.29316	3.94308	0.29894	4.82942	0.858915	5.88357		1.67645	5.22254	3.15103	0.0807874	7.22705	2.97804	6.33845		1.59	5.28746	3.93077	0.3	4.82958	0.86085	5.85
																1.91347	5.12146	4.67541	0.298592	4.8667	0.809747	5.89011		1.99821	5.07613	3.79666	0.0902551	7.2462	2.90117	6.38769		1.91	5.09596	4.62034	0.303333	4.86741	0.8184	5.74
																1.76178	5.15443	4.66931	0.204236	4.85632	0.805389	5.87694		1.84699	5.14742	3.7241	0.00517008	7.21667	2.86405	6.48323		1.76	5.14136	4.64109	0.206667	4.85668	0.809824	5.8
																1.72426	4.20755	3.70056	0.104187	4.87759	0.813335	5.94403		1.80804	4.22163	2.66316	-0.0823275	7.21905	2.84562	6.56307		1.72	4.17628	3.63305	0.11	4.87846	0.823943	5.76
																1.93238	4.8571	3.44103	0.196444	4.89832	0.770229	6.33471		2.01618	4.90429	2.33516	0.0214877	7.22009	2.77174	7.03123		1.92	4.76625	3.24488	0.213333	4.90085	0.801051	5.8
																1.92165	5.37099	2.7605	0.200762	4.95582	0.797955	6.10353		2.00974	5.49873	1.64082	0.0340174	7.25509	2.74939	7.11193		1.91	5.28544	2.57579	0.216667	4.95821	0.82698	5.6
																1.87413	4.86416	1.78981	0.214367	4.75034	0.791155	5.73834		1.96331	5.05631	0.601085	0.0620302	7.02652	2.69638	6.94064		1.87	4.83386	1.72439	0.22	4.75119	0.801435	5.56
																1.51611	5.93171	3.70921	0.10135	4.87592	0.742069	5.91596		1.6001	6.12915	2.36717	-0.0282666	7.13102	2.62346	6.99464		1.5	5.81347	3.45391	0.123333	4.87922	0.782186	5.22
																1.68815	5.87951	3.17812	0.129187	4.86663	0.802617	5.2302		1.77528	6.1575	1.80576	0.0130112	7.09724	2.63179	6.58954		1.69	5.89307	3.20739	0.126667	4.86625	0.798018	5.31
																1.53178	6.51174	4.2529	0.227577	4.95736	0.811498	5.2967		1.60854	6.74121	2.66894	0.140976	7.16875	2.6379	6.25321		1.53	6.49871	4.22476	0.23	4.95772	0.815919	5.22
																1.44215	5.83521	4.50686	0.244049	4.81037	0.818577	4.90076		1.51412	6.04335	2.81972	0.177843	7.00279	2.63578	5.65296		1.45	5.89285	4.6313	0.233333	4.80877	0.799022	5.24
																1.66748	5.05029	5.11588	-0.0598902	4.79647	0.770961	5.16099		1.73029	5.17535	3.29221	-0.103412	6.97399	2.60598	5.42777		1.67	5.06881	5.15587	-0.0633333	4.79595	0.764678	5.27
																1.55598	5.71166	5.52893	0.131842	4.75283	0.75436	5.65827		1.61672	5.79759	3.69822	0.0990535	6.9155	2.59442	5.72788		1.55	5.66778	5.43419	0.14	4.75405	0.769248	5.4
																1.22487	5.42401	4.79572	-0.263308	4.85008	0.764397	5.43026		1.28996	5.53109	3.05561	-0.294305	6.99607	2.58706	5.63093		1.22	5.38829	4.71859	-0.256667	4.85108	0.776517	5.22
																1.63574	5.54155	5.11096	-0.161161	4.85425	0.745669	5.54781		1.70288	5.66031	3.42506	-0.187653	6.98389	2.55315	5.8102		1.63	5.49945	5.02005	-0.153333	4.85543	0.759953	5.3
																1.70714	6.32699	5.20615	-0.159748	4.72841	0.763649	5.54862		1.77596	6.46176	3.56729	-0.181422	6.84157	2.55343	5.88369		1.7	6.27456	5.09294	-0.15	4.72987	0.781438	5.24
																1.72821	5.83387	5.72586	0.0557715	4.81522	0.771145	5.23281		1.7986	5.99183	4.12979	0.0391122	6.91153	2.53949	5.66515		1.73	5.84698	5.75418	0.0533333	4.81485	0.766696	5.31
																1.46095	5.52141	6.05499	0.0553757	4.93875	0.818758	5.33087		1.52636	5.64124	4.41453	0.0507177	7.02117	2.58922	5.53635		1.46	5.51447	6.04	0.0566667	4.93895	0.821114	5.29
																1.56349	6.42394	6.93848	-0.0447603	4.88366	0.778126	5.40071		1.62734	6.52775	5.31494	-0.0432986	6.95223	2.54402	5.52095		1.56	6.39833	6.8832	-0.04	4.88437	0.786813	5.25
																1.37746	5.84951	6.47096	-0.133202	4.86879	0.751783	5.08033		1.44176	5.95595	4.89672	-0.128944	6.92324	2.50632	5.21865		1.38	5.86814	6.51119	-0.136667	4.86827	0.745462	5.19
																1.25712	5.40868	7.31378	-0.129406	4.86803	0.745739	5.26567		1.31778	5.47829	5.73643	-0.11861	6.91056	2.50435	5.21777		1.26	5.4298	7.35939	-0.133333	4.86744	0.738573	5.39
																1.62154	4.83655	6.43492	-0.232097	4.95999	0.760943	5.57638		1.67973	4.87179	4.88269	-0.218113	6.99155	2.52431	5.3773		1.62	4.82527	6.41057	-0.23	4.96031	0.764769	5.51
																1.5412	4.60768	6.43035	-0.441956	4.85249	0.700612	5.98405		1.60069	4.64208	4.96022	-0.430467	6.87232	2.45651	5.81993		1.53	4.52544	6.25278	-0.426667	4.85479	0.728514	5.5
																1.52469	5.1635	6.10831	-0.343387	4.93228	0.684838	6.19488		1.5908	5.26107	4.78323	-0.340021	6.93734	2.40694	6.38003		1.51	5.05564	5.87542	-0.323333	4.93529	0.721434	5.56
																1.74055	5.73066	6.9805	-0.434403	4.84564	0.700505	5.97599		1.81217	5.90712	5.7604	-0.435403	6.83392	2.37879	6.53963		1.73	5.65319	6.81323	-0.42	4.8478	0.726789	5.52
																1.48574	5.95685	7.40414	-0.524505	4.90869	0.696701	5.78816		1.55701	6.17545	6.18861	-0.520809	6.88057	2.34212	6.49363		1.48	5.91469	7.3131	-0.516667	4.90986	0.711006	5.54
																1.58395	5.78933	7.59188	-0.41873	4.86091	0.686267	5.71086		1.65073	6.0127	6.32109	-0.404955	6.81767	2.31255	6.35304		1.58	5.7603	7.5292	-0.413333	4.86172	0.696116	5.54
																1.73536	5.84208	8.60755	-0.61731	4.78367	0.698367	5.73142		1.79713	6.05693	7.28245	-0.593538	6.72619	2.31164	6.25507		1.73	5.80276	8.52266	-0.61	4.78477	0.711706	5.5
																1.56646	5.83865	8.62601	-0.715485	4.94851	0.676695	5.79919		1.62509	6.05432	7.28083	-0.684773	6.87682	2.27448	6.27004		1.56	5.79122	8.52359	-0.706667	4.94983	0.692788	5.52
																1.57739	5.88288	8.25992	-0.613416	4.98166	0.730014	5.81922		1.63392	6.1059	6.91345	-0.57752	6.89569	2.31021	6.27898		1.57	5.82865	8.14282	-0.603333	4.98318	0.748415	5.5
																1.66431	5.184	8.62699	-0.70588	4.98001	0.717254	5.74614		1.71928	5.41906	7.28845	-0.66573	6.87963	2.27804	6.22117		1.66	5.15237	8.55871	-0.7	4.98089	0.727984	5.56
																1.64372	5.43381	7.61273	-0.715393	4.9584	0.658949	6.10285		1.69501	5.65893	6.25566	-0.669006	6.84473	2.20893	6.48104		1.63	5.33309	7.39525	-0.696667	4.96121	0.693123	5.51
																1.66175	5.5151	6.92448	-0.609369	4.9218	0.650132	5.99769		1.7158	5.79256	5.63838	-0.564405	6.79216	2.16522	6.60758		1.65	5.42884	6.73824	-0.593333	4.92421	0.679397	5.49
																1.66056	6.10028	7.26342	-1.00441	5.24617	0.714676	5.90634		1.71402	6.41061	5.99058	-0.955762	7.10064	2.20028	6.61893		1.65	6.02275	7.09602	-0.99	5.24834	0.74098	5.45
																1.74694	6.96827	7.27217	-0.899471	4.94284	0.67374	5.78983		1.79811	7.29905	5.98603	-0.844724	6.78161	2.13382	6.53081		1.74	6.91733	7.16218	-0.89	4.94426	0.691023	5.49
																1.68825	6.85805	5.94474	-0.787614	5.01648	0.69254	5.48447		1.73462	7.18232	4.61407	-0.724174	6.84076	2.13766	6.11666		1.69	6.87088	5.97245	-0.79	5.01612	0.688187	5.56
																1.64919	6.14312	4.80476	-0.788892	4.96955	0.688299	5.50493		1.68634	6.40413	3.38398	-0.713489	6.78265	2.14233	5.75905		1.65	6.14908	4.81762	-0.79	4.96939	0.686277	5.54
																2.09537	6.08921	5.94946	-0.794002	4.95083	0.695897	5.78223		2.12705	6.30026	4.51391	-0.714075	6.7537	2.15718	5.7777		2.09	6.04976	5.86427	-0.786667	4.95193	0.709284	5.55
																2.65814	6.55596	4.85682	-0.694437	4.9311	0.674181	5.86153		2.69013	6.76376	3.49722	-0.618632	6.72264	2.12627	5.86763		2.65	6.49624	4.72787	-0.683333	4.93277	0.694444	5.51
																2.55384	6.50666	4.88122	-0.798884	4.85656	0.676815	5.66785		2.58749	6.73034	3.61172	-0.729031	6.63597	2.11156	5.77671		2.54	6.40509	4.66191	-0.78	4.8594	0.711277	5.07
																2.61309	6.35461	3.89227	-0.894535	4.92213	0.707701	5.39569		2.65079	6.63009	2.73366	-0.832605	6.68734	2.10936	5.77242		2.6	6.2585	3.68476	-0.876667	4.92481	0.740309	4.83
																2.5946	6.75498	3.98219	-0.893257	5.04908	0.780025	5.31076		2.63344	7.07147	2.87752	-0.834293	6.79962	2.15006	5.86358		2.58	6.64781	3.75081	-0.873333	5.05207	0.816384	4.68
																2.63912	6.7982	3.84418	-0.982451	4.95906	0.725002	5.02419		2.67847	7.16041	2.77281	-0.924414	6.69393	2.05972	5.75406		2.63	6.73123	3.69958	-0.97	4.96093	0.747725	4.63
																2.10574	6.64614	4.20565	-0.874501	4.99994	0.736875	5.00803		2.14074	7.01224	3.09472	-0.811005	6.72046	2.05133	5.6823		2.1	6.604	4.11466	-0.866667	5.00112	0.751173	4.76
																2.28568	6.69527	4.29565	-1.07109	5.08461	0.663235	5.05543		2.3148	7.04192	3.13143	-1.00111	6.79206	1.96744	5.56705		2.28	6.65357	4.20562	-1.06333	5.08577	0.677382	4.81
																2.12974	7.12213	4.27896	-0.973286	5.05702	0.664311	5.16062		2.15437	7.4507	3.09153	-0.899759	6.75194	1.95937	5.541		2.12	7.05067	4.12466	-0.96	5.05901	0.688557	4.74
																2.08355	6.66886	4.22567	-1.06151	5.06733	0.646804	4.8934		2.10724	7.00776	3.06938	-0.989388	6.74884	1.92256	5.30498		2.08	6.6428	4.1694	-1.05667	5.06806	0.655647	4.74
																2.21754	6.56627	4.77508	-0.96363	5.08364	0.615761	5.08598		2.23617	6.87384	3.59539	-0.888739	6.75372	1.88848	5.31455		2.21	6.51089	4.6555	-0.953333	5.08518	0.634551	4.76
																2.03257	6.66571	5.72382	-0.953505	5.07428	0.662146	5.10096		2.05009	6.97181	4.58306	-0.881693	6.73221	1.92156	5.32239		2.03	6.64686	5.68312	-0.95	5.07481	0.668543	4.99
																2.17343	6.80158	4.04973	-1.05135	5.08755	0.694391	5.21837		2.18678	7.07418	2.90833	-0.979893	6.73505	1.95323	5.27114		2.17	6.77637	3.9953	-1.04667	5.08826	0.702944	5.07
																2.30223	6.94278	3.79433	-1.04638	5.09663	0.730876	5.31654		2.31332	7.19194	2.68671	-0.978974	6.73395	1.98661	5.27329		2.3	6.92638	3.75892	-1.04333	5.09708	0.736441	5.22
																2.36461	6.75689	4.36726	-1.1463	5.01115	0.809641	5.3994		2.37346	6.97824	3.29771	-1.08412	6.63903	2.06473	5.24917		2.36	6.72301	4.29411	-1.14	5.0121	0.821135	5.2
																1.97277	7.04395	4.90432	-1.13711	5.00042	1.02313	5.53955		1.98167	7.2572	3.90613	-1.08372	6.61842	2.27049	5.39392		1.97	7.02364	4.86047	-1.13333	5.00099	1.03002	5.42
																1.74701	7.76415	5.38473	-1.23623	4.83649	1.83888	5.60278		1.75474	7.95916	4.43824	-1.19062	6.44521	3.08226	5.4071		1.74	7.71271	5.27366	-1.22667	4.83792	1.85633	5.3
																1.64984	7.613	4.79379	-1.21979	5.02874	0.967587	5.44326		1.6594	7.82056	3.93639	-1.18563	6.62694	2.19493	5.35737		1.65	7.61415	4.79626	-1.22	5.0287	0.967199	5.45
																1.86237	8.43164	4.4266	-1.10625	5.00795	0.901808	5.40025		1.86844	8.60433	3.57958	-1.07737	6.59763	2.13083	5.16767		1.87	8.48766	4.54756	-1.11667	5.00638	0.8828	5.73
																2.32624	8.9143	4.55881	-1.19455	4.98703	0.794568	5.25548		2.32563	9.00823	3.68847	-1.16906	6.57105	2.04423	4.67281		2.34	9.01531	4.7769	-1.21333	4.98421	0.760298	5.85
																2.15149	7.52848	4.95444	-1.38474	4.97022	1.02773	5.22014		2.14357	7.51414	4.07295	-1.36519	6.55162	2.31317	4.18308		2.17	7.66437	5.24785	-1.41	4.96643	0.981625	6.02
																2.60374	7.69458	4.5995	-1.19813	4.97713	0.694615	5.99973		2.58958	7.5557	3.74569	-1.18985	6.55882	2.02655	4.48225		2.61	7.7405	4.69864	-1.20667	4.97585	0.679035	6.27
																2.43919	7.75401	4.80389	-1.18858	4.93929	0.820882	6.06281		2.43036	7.58817	4.14856	-1.20783	6.51865	2.16446	4.6145		2.45	7.83339	4.97527	-1.20333	4.93707	0.793952	6.53
																2.30332	7.63383	4.058	-1.19088	4.96216	0.766969	6.25129		2.29638	7.41766	3.54138	-1.23396	6.54045	2.13025	4.73457		2.31	7.68288	4.16391	-1.2	4.96079	0.750327	6.54
																2.52536	7.43613	3.34387	-1.09034	4.96226	0.685158	6.29962		2.52349	7.20556	2.99964	-1.16118	6.53824	2.05396	4.89636		2.53	7.47017	3.41737	-1.09667	4.96131	0.673608	6.5
																2.54514	7.86705	4.17565	-1.2867	4.93779	0.692712	6.30991		2.54872	7.63997	3.9896	-1.3847	6.51031	2.05837	5.08695		2.55	7.90274	4.25272	-1.29333	4.93679	0.680601	6.52
																2.56414	7.54978	2.48758	-1.282	4.89581	0.698608	6.25669		2.57174	7.3267	2.41831	-1.40388	6.46421	2.05892	5.18595		2.57	7.59282	2.5805	-1.29	4.8946	0.684006	6.51
																2.7973	7.1953	2.06742	-1.28299	4.9228	0.800827	6.39354		2.80735	6.97111	2.07519	-1.42537	6.48672	2.1563	5.4245		2.8	7.21509	2.11014	-1.28667	4.92225	0.794113	6.51
																2.90409	6.25452	1.13373	-1.28892	4.94269	0.989396	6.57682		2.91805	6.05155	1.22183	-1.45178	6.50051	2.33016	5.80601		2.9	6.22448	1.06887	-1.28333	4.94353	0.999588	6.4
																2.7617	6.91801	0.745939	-1.00962	4.94653	0.8366	6.91778		2.78244	6.77925	0.929454	-1.1934	6.49512	2.14365	6.53423		2.74	6.75868	0.40193	-0.98	4.95097	0.890656	5.98
																2.96616	5.80015	-0.228246	-0.99872	4.97588	0.840145	6.1882		3.00151	5.83358	0.116923	-1.20706	6.50796	2.06666	6.68571		2.95	5.68153	-0.48437	-0.976667	4.97919	0.880392	5.49
																2.93097	4.67247	-0.793542	-0.901954	5.00414	0.644863	6.2161		2.97048	4.82085	-0.483267	-1.11543	6.51853	1.80564	7.19112		2.91	4.51853	-1.12593	-0.873333	5.00844	0.697094	5.31
																2.75765	5.22457	-1.53242	-0.82138	4.98429	0.625262	6.42664		2.8008	5.5036	-1.29444	-1.03385	6.47758	1.71023	7.90448		2.72	4.94821	-2.12913	-0.77	4.99201	0.719027	4.8
																2.6766	5.3301	-2.30345	-0.916618	4.96801	0.874315	5.79141		2.72988	5.83026	-2.08577	-1.12869	6.4328	1.84334	8.17438		2.64	5.06142	-2.88356	-0.866667	4.97551	0.965473	4.21
																2.58214	4.93353	-3.04688	-0.7072	5.04667	0.662991	5.35878		2.63769	5.61767	-3.00289	-0.901431	6.48023	1.52326	8.3536		2.55	4.69758	-3.55633	-0.663333	5.05325	0.743044	3.97
																2.9318	4.78833	-3.45889	-0.603393	5.06224	0.814575	5.14377		2.98227	5.60003	-3.7096	-0.765305	6.46388	1.58425	8.40448		2.9	4.55493	-3.96284	-0.56	5.06875	0.893764	3.77
																3.03222	4.79298	-3.30013	-0.300634	5.07017	0.689284	5.04196		3.0757	5.70867	-3.8703	-0.424368	6.43892	1.37683	8.43748		3	4.55649	-3.81075	-0.256667	5.07677	0.76952	3.65
																3.46946	2.17696	-3.92066	-0.207186	5.00289	0.962296	4.77494		3.50544	3.18081	-4.80637	-0.289761	6.33806	1.57429	8.23051		3.43	1.88729	-4.54609	-0.153333	5.01097	1.06057	3.07
																3.67688	5.13947	-3.6136	0.058727	5.10017	0.683919	5.37962		3.70943	6.26224	-4.74698	0.0146635	6.39916	1.20882	9.06448		3.61	4.64853	-4.67361	0.15	5.11387	0.850486	2.49
																3.06615	4.11188	-4.59437	0.303994	5.1953	0.835906	3.65205		3.10995	5.51259	-5.78542	0.286286	6.44841	1.20887	8.35874		3.03	3.84649	-5.16738	0.353333	5.20271	0.925948	2.09
																3.01845	3.1905	-4.27378	0.504197	5.1626	0.898805	3.48115		3.04577	4.62885	-5.92125	0.550283	6.37704	1.20724	7.8794		2.98	2.90827	-4.88315	0.556667	5.17047	0.994559	1.82
																2.84163	3.13345	-3.00185	0.503187	5.21011	0.774566	3.52864		2.85649	4.61256	-5.00617	0.606821	6.38623	1.02172	7.70093		2.8	2.82786	-3.66165	0.56	5.21864	0.878245	1.73
																3.04899	3.46671	-2.47397	0.510119	5.27992	0.734158	3.42471		3.05493	4.99615	-4.7496	0.665701	6.41768	0.919452	7.47006		3.01	3.18048	-3.09198	0.563333	5.28791	0.83127	1.74
																2.72603	3.83212	-1.48177	0.517488	5.31443	0.676978	3.28694		2.72194	5.38308	-4.01016	0.724523	6.41552	0.81392	7.09346		2.69	3.5676	-2.05291	0.566667	5.32181	0.766725	1.73
																2.95059	4.56951	-0.879664	0.728255	5.34962	0.673032	3.07162		2.93599	6.11518	-3.62789	0.984293	6.41628	0.775201	6.54967		2.92	4.34497	-1.36448	0.77	5.35589	0.749214	1.75
																3.03181	3.50336	0.00404101	0.643561	5.39918	0.954242	2.69255		3.00538	5.0047	-2.93795	0.945912	6.43481	1.04075	5.69928		3.01	3.34322	-0.34172	0.673333	5.40365	1.00857	1.75
																3.12264	3.88654	1.72881	0.632123	5.40871	0.785061	3.16021		3.08213	5.28842	-1.38496	0.97742	6.41831	0.882602	5.4869		3.09	3.64695	1.2115	0.676667	5.4154	0.86635	1.75
																3.41949	4.57441	2.01239	0.639749	5.44953	0.729122	3.00431		3.37629	5.95752	-1.0684	1.00872	6.43233	0.811669	5.15162		3.39	4.35791	1.54493	0.68	5.45557	0.802578	1.73
																3.46261	4.28197	2.04039	0.552471	5.50903	0.626608	2.71708		3.41514	5.62734	-1.00583	0.943061	6.46739	0.702789	4.60982		3.44	4.11597	1.68196	0.583333	5.51366	0.68293	1.74
																3.79514	5.57754	2.61579	0.552358	5.5027	0.621773	2.83618		3.74027	6.84451	-0.41054	0.963413	6.44042	0.709603	4.29849		3.77	5.393	2.21734	0.586667	5.50785	0.684383	1.75
																3.81453	3.19053	2.58511	0.570176	5.52816	0.726086	2.3776		3.75645	4.40533	-0.334004	0.991603	6.44646	0.818401	3.59334		3.8	3.0839	2.35488	0.59	5.53113	0.762263	1.75
																3.44472	4.39922	4.10562	0.732299	5.50085	0.686962	3.2723		3.37804	5.49987	1.24429	1.16522	6.40469	0.809997	3.9525		3.4	4.07093	3.39679	0.793333	5.51001	0.798346	1.34
																3.6473	5.30838	3.29837	0.859403	5.64114	0.862395	2.41975		3.59406	6.50742	0.809195	1.2748	6.52284	0.935093	3.69944		3.62	5.10794	2.8656	0.896667	5.64674	0.930399	1.24
																3.36556	5.11541	3.05852	0.678764	5.64412	0.709573	1.91233		3.30898	6.28936	0.683575	1.0968	6.50823	0.774258	3.07482		3.35	5.00118	2.81189	0.7	5.6473	0.748328	1.24
																3.36699	4.52468	3.42923	0.780141	5.66407	0.723905	1.99424		3.30031	5.60091	1.08952	1.20506	6.51532	0.810025	2.68132		3.35	4.39993	3.15988	0.803333	5.66755	0.766229	1.26
																3.14166	5.14988	2.44982	0.777106	5.72622	0.6983	2.18587		3.06932	6.15085	0.2315	1.19874	6.56601	0.800701	2.56735		3.12	4.99088	2.10651	0.806667	5.73065	0.752247	1.25
																2.97542	4.43331	1.22078	0.888952	5.74526	0.841013	1.92637		2.90234	5.40066	-0.798971	1.29807	6.57339	0.944976	2.24362		2.96	4.32009	0.97633	0.91	5.74842	0.879424	1.26
																3.0308	4.89544	0.905905	0.984946	5.76844	0.782244	2.1587		2.9532	5.79498	-0.966429	1.38329	6.58751	0.901031	2.23661		3.01	4.74275	0.57623	1.01333	5.7727	0.834048	1.26
																2.66669	5.04725	0.0549554	1.19388	5.71388	0.765387	1.94127		2.58952	5.9248	-1.59972	1.57303	6.52312	0.881982	2.03297		2.65	4.92471	-0.20963	1.21667	5.7173	0.806963	1.22
																2.14643	4.96862	0.721382	1.09757	5.69179	0.72184	1.72005		2.06672	5.80274	-0.764284	1.45941	6.49274	0.843676	1.70476		2.13	4.84798	0.46091	1.12	5.69516	0.76277	1.01
																2.57245	5.94154	0.507492	1.00635	5.64685	0.720609	1.5678		2.49076	6.73838	-0.805035	1.34838	6.44004	0.845387	1.48142		2.56	5.85017	0.31021	1.02333	5.6494	0.751609	1.03
																2.83656	6.05547	0.864265	1.01771	5.62082	0.713864	1.29344		2.75097	6.79609	-0.305655	1.3404	6.40786	0.849023	1.04102		2.83	6.00731	0.76029	1.02667	5.62216	0.730203	1.01
																2.4052	5.62315	1.29511	0.922896	5.63034	0.744534	1.23489		2.31352	6.27853	0.240395	1.22627	6.41369	0.902576	0.683715		2.4	5.58494	1.21261	0.93	5.6314	0.757497	1.01
																2.32939	5.96596	1.62182	0.720517	5.63784	0.761229	1.40575		2.23341	6.54037	0.713289	0.999509	6.4188	0.942621	0.608938		2.32	5.89702	1.47298	0.733333	5.63976	0.784618	1
																2.339	5.60863	2.02641	0.624379	5.63413	0.864281	1.36901		2.24343	6.14244	1.3267	0.871484	6.41197	1.05445	0.553664		2.33	5.54254	1.88371	0.636667	5.63598	0.886705	0.98
																2.29278	6.12455	1.76362	0.622556	5.64794	0.715456	1.55225		2.19763	6.62358	1.25891	0.837131	6.42272	0.911414	0.74021		2.28	6.03072	1.56104	0.64	5.65056	0.747289	1
																2.28789	6.47915	1.96836	0.532571	5.63035	0.644082	1.35074		2.19561	6.9756	1.6743	0.711904	6.40059	0.8322	0.695085		2.28	6.42126	1.84337	0.543333	5.63196	0.663723	1.01
																2.25561	6.32669	1.65851	0.739014	5.60137	0.706135	1.24227		2.16215	6.79195	1.49824	0.888528	6.36795	0.895769	0.569944		2.25	6.28553	1.56964	0.746667	5.60252	0.7201	1
																1.93466	6.1699	2.81675	0.543639	5.62039	0.790758	1.20139		1.8392	6.59548	2.7672	0.664219	6.38377	0.985101	0.466309		1.93	6.13568	2.74287	0.55	5.62135	0.802367	1
																2.09758	7.0705	3.65936	0.542987	5.59121	0.724551	1.32756		2.00055	7.45756	3.71686	0.633963	6.35151	0.923467	0.539179		2.09	7.01485	3.5392	0.553333	5.59276	0.743433	1
																2.15905	6.09567	2.50499	0.557968	5.66956	0.762701	0.988809		2.06316	6.47044	2.69421	0.616528	6.42558	0.955944	0.282374		2.16	6.10267	2.5201	0.556667	5.66936	0.760326	1.03
																2.12249	6.2303	2.9009	0.456606	5.64915	0.64695	1.36746		2.02236	6.54097	3.13487	0.489416	6.40303	0.854301	0.466297		2.12	6.21204	2.86148	0.46	5.64966	0.653144	1.26
																2.33254	5.3617	3.13551	0.359861	5.64884	0.648954	1.53992		2.23253	5.64073	3.47039	0.361441	6.39955	0.859255	0.631162		2.33	5.34303	3.09519	0.363333	5.64936	0.65529	1.43
																2.14082	6.28362	2.74912	0.351904	5.66301	0.684342	2.07737		2.04157	6.53764	3.18058	0.322174	6.41009	0.894903	1.1919		2.13	6.20421	2.57767	0.366667	5.66523	0.711283	1.61
																2.163	6.76326	3.44587	0.465912	5.66865	0.671235	1.88941		2.06993	7.05167	4.02792	0.400371	6.4088	0.857985	1.32088		2.16	6.74127	3.3984	0.47	5.66926	0.678694	1.76
																1.83568	6.56353	2.75828	0.379235	5.68883	0.796992	1.74316		1.74189	6.83318	3.36979	0.28852	6.42317	0.978188	1.17835		1.84	6.59527	2.82682	0.373333	5.68795	0.786223	1.93
																1.90587	6.93509	3.58797	0.382299	5.70198	0.74996	1.98168		1.8076	7.1419	4.17135	0.271332	6.43237	0.943546	1.19784		1.91	6.96539	3.65339	0.376667	5.70114	0.739681	2.16
																1.87385	5.99934	3.77066	0.288399	5.63343	0.717046	2.0141		1.77381	6.15362	4.36629	0.153588	6.35991	0.921382	1.09323		1.88	6.04452	3.8682	0.28	5.63217	0.701719	2.28
																1.46034	6.3543	3.95164	0.382865	5.63204	0.679677	2.51484		1.35913	6.45094	4.56655	0.223412	6.3552	0.898419	1.44849		1.46	6.35178	3.9462	0.383333	5.63211	0.680532	2.5
																1.55667	6.08623	4.26337	0.191217	5.60932	0.711908	2.48595		1.46011	6.17661	4.97083	0.000957181	6.32695	0.926122	1.55123		1.56	6.1107	4.31621	0.186667	5.60864	0.703604	2.63
																1.84015	6.88731	4.00737	0.1898	5.59461	0.709312	2.79635		1.74543	6.95026	4.75225	-0.0262788	6.30705	0.926408	1.86613		1.84	6.88623	4.00504	0.19	5.59464	0.709678	2.79
																2.00215	5.83097	3.19706	0.104051	5.61754	0.696646	2.6607		1.912	5.89433	4.00382	-0.139415	6.32313	0.90578	1.87357		2.01	5.88862	3.32153	0.0933333	5.61593	0.677088	3
																1.92547	7.1297	4.66733	-0.0107982	5.57895	0.632446	3.27633		1.83442	7.1428	5.44806	-0.273687	6.27941	0.852928	2.35626		1.92	7.08955	4.58064	-0.00333333	5.58007	0.646069	3.04
																1.66112	7.36407	3.32193	0.0121123	5.53876	0.706347	2.87654		1.57911	7.42136	4.20349	-0.280126	6.22961	0.902135	2.31843		1.67	7.42922	3.4626	0	5.53695	0.684243	3.26
																1.92683	6.92253	3.4573	-0.0820317	5.5563	0.738849	2.93114		1.84262	6.92642	4.26467	-0.387831	6.24072	0.945999	2.19286		1.94	7.01918	3.66598	-0.1	5.5536	0.706058	3.5
																1.68394	6.74185	1.5497	0.0082747	5.58241	0.679982	3.35803		1.59719	6.67157	2.28576	-0.310941	6.26188	0.909314	2.36073		1.69	6.78636	1.6458	0	5.58117	0.664881	3.62
																1.72314	6.54102	1.84983	0.00935826	5.5843	0.61771	3.48373		1.64106	6.45307	2.61743	-0.331551	6.25686	0.849737	2.54775		1.73	6.59136	1.95851	0	5.5829	0.600631	3.78
																1.89256	6.09576	2.65553	0.01349	5.59441	0.701638	3.67845		1.81467	5.98862	3.43741	-0.346931	6.25974	0.936869	2.78621		1.9	6.15039	2.77349	0.00333333	5.59289	0.683102	4
																1.92738	5.73562	2.62032	-0.0897533	5.53585	0.776275	4.04666		1.85351	5.60914	3.40492	-0.467904	6.19366	1.01491	3.19035		1.93	5.75488	2.6619	-0.0933333	5.53531	0.769742	4.16
																1.71274	6.98099	2.34457	-0.293741	5.51701	0.601498	4.40843		1.64608	6.87017	3.1639	-0.691263	6.16525	0.829776	3.75923		1.71	6.96087	2.30113	-0.29	5.51757	0.608324	4.29
																1.71118	6.51151	1.49024	-0.177968	5.54693	0.670427	4.10907		1.65375	6.45052	2.35033	-0.593785	6.18287	0.873258	3.81128		1.72	6.57623	1.62998	-0.19	5.54512	0.648468	4.49
																1.54519	6.41314	1.89585	-0.283435	5.53392	0.560119	4.38215		1.4875	6.32101	2.64903	-0.703481	6.16	0.767298	3.98081		1.55	6.44845	1.9721	-0.29	5.53294	0.548137	4.59
																1.60395	6.07661	2.13663	-0.281741	5.55067	0.63518	4.52853		1.54997	5.98322	2.83922	-0.709465	6.16555	0.836711	4.19172		1.61	6.12103	2.23255	-0.29	5.54943	0.620108	4.79
																1.62749	6.58971	1.95134	-0.383241	5.5338	0.653405	4.83156		1.57647	6.48723	2.58792	-0.815948	6.13746	0.852665	4.51319		1.63	6.60813	1.99112	-0.386667	5.53329	0.647155	4.94
																1.62627	5.88677	1.93193	-0.378237	5.56151	0.575912	4.82865		1.5807	5.79944	2.53233	-0.816986	6.1525	0.763877	4.65088		1.63	5.91418	1.99112	-0.383333	5.56075	0.566611	4.99
																1.76709	5.56335	2.22504	-0.276033	5.54813	0.564262	5.1144		1.72548	5.48131	2.76047	-0.716815	6.12625	0.744369	5.01048		1.77	5.58469	2.27111	-0.28	5.54754	0.557022	5.24
																1.8536	5.56738	2.44416	-0.281579	5.52347	0.597587	5.40553		1.81624	5.49509	2.91447	-0.722817	6.08807	0.768222	5.39074		1.85	5.54096	2.38711	-0.276667	5.52421	0.606552	5.25
																1.79458	5.3106	4.18959	-0.479588	5.51607	0.570167	5.44802		1.76508	5.28896	4.63564	-0.922926	6.06463	0.714955	5.71964		1.79	5.27696	4.11695	-0.473333	5.51701	0.581581	5.25
																1.81856	5.06585	2.90131	-0.581681	5.49916	0.581633	5.61981		1.79538	5.09455	3.28653	-1.0219	6.03042	0.698785	6.14079		1.81	5.00302	2.76565	-0.57	5.50091	0.60295	5.25
																1.75263	5.03427	1.82047	-0.480571	5.49348	0.566522	5.79572		1.73641	5.13206	2.13986	-0.914904	6.00532	0.647067	6.63193		1.74	4.94155	1.62028	-0.463333	5.49607	0.597979	5.25
																1.52232	5.65817	2.25605	-0.573486	5.52767	0.615729	5.7725		1.51315	5.84173	2.49492	-0.998054	6.01779	0.650941	6.97166		1.51	5.5677	2.06071	-0.556667	5.53019	0.646424	5.24
																1.5169	5.08943	1.52221	-0.359423	5.51024	0.597521	5.54833		1.51178	5.34429	1.62549	-0.766796	5.97765	0.590774	6.9961		1.51	5.03874	1.41277	-0.35	5.51166	0.614718	5.25
																1.72929	5.09236	2.58919	-0.456014	5.4662	0.653487	5.66145		1.72307	5.37183	2.48504	-0.83764	5.912	0.622284	7.09786		1.72	5.02415	2.44192	-0.443333	5.4681	0.676628	5.26
																1.6313	5.15855	2.62742	-0.55209	5.49093	0.59732	5.74829		1.62579	5.47232	2.35124	-0.908834	5.91448	0.539128	7.23347		1.62	5.07559	2.4483	-0.536667	5.49324	0.625467	5.26
																1.77162	4.89084	2.95387	-0.445857	5.48582	0.616253	5.75201		1.76772	5.24513	2.52568	-0.777392	5.88651	0.529187	7.31927		1.76	4.80555	2.76972	-0.43	5.4882	0.645191	5.25
																1.50291	4.8283	3.12033	-0.544284	5.4927	0.570928	5.80776		1.50012	5.21757	2.54022	-0.848738	5.87043	0.457392	7.42583		1.49	4.73354	2.91573	-0.526667	5.49534	0.603079	5.25
																1.68387	4.71719	2.76189	-0.342258	5.4776	0.482713	5.84915		1.68245	5.14294	2.04241	-0.618978	5.83212	0.342529	7.52594		1.67	4.6154	2.5421	-0.323333	5.48044	0.51725	5.25
																1.88251	4.243	2.7334	-0.237067	5.49088	0.477239	5.80034		1.88239	4.70441	1.88231	-0.485136	5.82206	0.310989	7.53042		1.87	4.1512	2.53518	-0.22	5.49344	0.508386	5.26
																2.1315	4.79317	2.69367	-0.342671	5.38043	0.55201	5.9488		2.13117	5.27442	1.70122	-0.559918	5.689	0.366277	7.65109		2.11	4.63537	2.35295	-0.313333	5.38484	0.605549	5.02
																2.01695	4.86215	3.23523	-0.229797	5.3219	0.710979	5.67229		2.02185	5.41699	2.18493	-0.421906	5.60542	0.485159	7.62744		2	4.73773	2.9666	-0.206667	5.32537	0.753191	4.94
																2.01797	4.97334	2.88249	-0.224518	5.32475	0.664718	5.53622		2.02277	5.56073	1.70229	-0.383995	5.5845	0.413349	7.50749		2	4.84146	2.59775	-0.2	5.32844	0.709461	4.76
																2.44967	5.66244	3.59754	-0.223517	5.30441	0.629958	5.34007		2.45451	6.28233	2.30176	-0.350485	5.54053	0.353511	7.33061		2.43	5.51801	3.2857	-0.196667	5.30845	0.678959	4.49
																2.62492	4.74994	2.49514	0.0863034	5.12128	0.886712	4.88468		2.63026	5.40694	1.10184	-0.00872688	5.33372	0.583669	6.91991		2.61	4.64041	2.25865	0.106667	5.12434	0.923873	4.24
																2.89384	4.52232	2.89668	0.0774581	4.86405	1.17344	4.97025		2.89595	5.17833	1.36888	0.0181282	5.05486	0.859057	6.85605		2.87	4.34728	2.51875	0.11	4.86893	1.23282	3.94
																3.33577	4.17598	1.85474	-0.0691251	4.88701	1.12474	4.95738		3.34086	4.88697	0.294587	-0.100879	5.05432	0.778417	7.00008		3.29	3.84003	1.12937	-0.00666667	4.89638	1.23872	2.98
																3.48294	4.22027	1.36478	0.118058	4.17649	1.81828	4.4655		3.50242	5.12063	-0.0830959	0.103101	4.31327	1.38474	7.32496		3.44	3.90502	0.68412	0.176667	4.18529	1.92523	2.61
																3.24721	4.30987	-0.0451015	-0.00443104	3.72324	2.19172	4.31983		3.27167	5.35582	-1.54359	0.0134612	3.82862	1.68069	7.66842		3.2	3.96331	-0.79338	0.06	3.73292	2.30931	2.28
																2.92212	4.55304	-0.567464	0.382198	3.32013	2.67109	4.23207		2.94952	5.75095	-2.16007	0.438991	3.39182	2.07571	8.04513		2.87	4.17042	-1.3936	0.453333	3.3308	2.8009	1.98
																3.12288	4.87238	-0.975621	0.58815	3.1887	2.65742	3.85258		3.15177	6.23132	-2.69384	0.689086	3.22429	1.97014	8.12509		3.08	4.55763	-1.65521	0.646667	3.19748	2.76421	2
																3.20828	4.35015	-1.52475	0.787762	3.20731	2.85288	3.6638		3.22866	5.78495	-3.50575	0.946674	3.2091	2.10405	7.91781		3.17	4.06917	-2.13142	0.84	3.21516	2.94821	2.01
																3.36182	3.80098	-3.17319	1.04626	3.21953	2.79213	3.8069		3.37061	5.26663	-5.43103	1.26565	3.18973	2.00075	7.8331		3.32	3.49399	-3.83602	1.10333	3.2281	2.89628	2
																3.50856	2.8631	-7.59294	1.0004	3.22271	4.86629	3.90794		3.50928	4.37361	-10.0444	1.27393	3.16158	4.02954	7.82136		3.46	2.50666	-8.36254	1.06667	3.23266	4.98723	1.81
																4.95381	1.97169	-5.76919	1.31562	3.23807	9.98883	4.59109		4.95074	3.56095	-8.33127	1.63683	3.14453	9.09445	8.5885		4.87	1.35647	-7.09753	1.43	3.25524	10.1976	0.97
																6.3918	0.042771	-7.01064	1.54075	3.22832	10.8434	5.22066		6.40474	1.92725	-9.41978	1.88903	3.09132	9.80382	10.3926		6.28	-0.77795	-8.78269	1.69333	3.25122	11.1219	0.39
																6.30918	-0.84518	-9.43875	1.98037	3.28119	11.9349	5.74127		6.34396	1.4772	-11.6834	2.35882	3.08879	10.6811	12.6595		6.18	-1.79343	-11.4862	2.15667	3.30766	12.2566	0.16
																5.40376	-0.490438	-11.242	2.43746	3.26197	9.71891	5.92917		5.45504	2.32368	-13.486	2.86601	3.0039	8.21267	14.6485		5.27	-1.47231	-13.362	2.62	3.28937	10.052	0.15
																5.17313	-0.656451	-11.8405	2.94228	3.2724	9.72678	5.1078		5.22758	2.6101	-14.3431	3.45	2.94236	7.96715	15.2171		5.06	-1.48688	-13.6336	3.09667	3.29557	10.0085	0.22
																5.81948	-1.61513	-13.0594	3.32392	3.28894	10.8651	4.91039		5.85218	1.90175	-16.1878	3.94826	2.89016	8.92117	15.2423		5.71	-2.41882	-14.7946	3.47333	3.31137	11.1378	0.18
																5.34969	-1.84228	-12.9351	3.58666	3.80734	10.2939	5.32128		5.3561	1.85649	-16.7104	4.33408	3.34102	8.19284	15.5465		5.23	-2.72087	-14.8321	3.75	3.83186	10.592	0.15
																4.70242	-2.20739	-13.4261	3.9599	4.15909	10.0333	5.03753		4.6889	1.70399	-17.7089	4.82224	3.62304	7.76541	15.3689		4.59	-3.03268	-15.208	4.11333	4.18212	10.3133	0.18
																4.07702	-2.19223	-13.6356	4.0306	4.52047	9.27716	4.83418		4.03701	1.84565	-18.4651	5.01382	3.91781	6.87702	14.861		3.97	-2.97787	-15.3319	4.17667	4.5424	9.54371	0.21
																3.67151	-1.85756	-12.3365	4.00146	4.82848	8.84126	4.54608		3.60288	2.2439	-17.6688	5.10283	4.16309	6.33774	14.0268		3.57	-2.60275	-13.9455	4.14	4.84928	9.09409	0.16
																3.27328	-0.639693	-10.1343	4.07269	5.13433	8.96945	4.19045		3.17558	3.4707	-15.8899	5.28494	4.41099	6.38998	12.9518		3.18	-1.32446	-11.6128	4.2	5.15344	9.20178	0.16
																3.07928	-1.01209	-5.6544	4.2518	5.30325	9.29029	3.57549		2.95161	3.04315	-11.7526	5.56587	4.5283	6.6672	11.4125		3	-1.59407	-6.91099	4.36	5.31949	9.48774	0.15
																2.95933	0.297191	-6.24009	4.41174	5.26332	9.25635	3.54747		2.79882	4.20524	-12.6168	5.81811	4.44575	6.63461	10.1339		2.88	-0.28513	-7.4974	4.52	5.27957	9.45392	0.12
																3.17524	1.69772	-4.90398	4.2843	5.28994	9.60243	2.93862		2.99018	5.47174	-11.3387	5.75868	4.43514	6.98743	8.51432		3.11	1.21884	-5.93794	4.37333	5.3033	9.76491	0.12
																2.57487	3.15904	-1.95146	4.25178	5.31855	9.86616	2.49086		2.3627	6.72092	-8.38669	5.78241	4.43591	7.29681	6.79274		2.52	2.75623	-2.82117	4.32667	5.32979	10.0028	0.12
																2.66094	2.5287	1.36477	4.12413	5.28495	9.91919	1.87887		2.42361	5.83629	-4.94587	5.69204	4.3834	7.42213	4.85331		2.62	2.22817	0.71589	4.18	5.29334	10.0212	0.11
																2.77622	3.04868	2.46833	4.10359	5.27617	10.1599	2.12695		2.51399	6.04412	-3.61978	5.69079	4.36593	7.76813	3.63961		2.73	2.7094	1.73578	4.16667	5.28563	10.275	0.13
																2.47287	4.12805	4.72618	4.19483	5.23897	10.2336	2.01231		2.19893	6.88844	-0.878742	5.76895	4.32426	7.92671	2.62038		2.43	3.81335	4.04669	4.25333	5.24775	10.3403	0.16
																2.59099	4.21836	5.77361	4.1977	5.20705	10.3518	1.53919		2.30853	6.75754	0.737549	5.74134	4.29313	8.129	1.39787		2.56	3.99083	5.28235	4.24	5.2134	10.429	0.2
																2.77082	4.14564	8.37219	3.88794	5.20794	10.3746	1.53153		2.4768	6.42138	3.89452	5.39171	4.30219	8.256	0.489037		2.74	3.91942	7.88374	3.93	5.21425	10.4514	0.2
																3.29528	3.77184	9.01513	3.67185	5.17936	10.2845	1.70449		2.99549	5.82438	5.20119	5.11657	4.28554	8.25852	0.0445555		3.26	3.51283	8.4559	3.72	5.18659	10.3724	0.18
																3.11161	3.7906	8.39276	3.65322	5.15205	10.1792	1.97774		2.81249	5.68679	5.33033	5.02199	4.27128	8.22088	0.0780978		3.07	3.48517	7.73329	3.71	5.16057	10.2829	0.18
																3.23126	2.98536	7.52615	3.74035	5.20421	9.97385	1.97281		2.93751	4.79655	5.25005	5.02202	4.33561	8.05282	0.183778		3.19	2.68246	6.87216	3.79667	5.21266	10.0766	0.19
																3.17694	4.04368	7.04567	3.71928	5.35395	9.70944	2.21797		2.88658	5.78875	5.48053	4.91326	4.49749	7.81334	0.581194		3.13	3.69913	6.30174	3.78333	5.36356	9.82634	0.19
																3.12638	4.02062	6.25331	3.62035	5.49692	9.48495	1.76186		2.84125	5.7546	5.36899	4.72348	4.65015	7.58698	0.501644		3.09	3.75356	5.6767	3.67	5.50437	9.57556	0.19
																3.1456	4.42814	5.86149	4.01141	5.92423	9.42007	1.72828		2.85612	6.09244	5.46927	5.03483	5.08911	7.53727	0.470677		3.11	4.16679	5.2972	4.06	5.93152	9.50874	0.19
																2.82572	4.12122	6.38051	3.5149	6.6329	9.11129	1.29122		2.5319	5.72703	6.44125	4.4575	5.80906	7.23696	0.07137		2.8	3.93243	5.97288	3.55	6.63816	9.17535	0.18
																2.69846	4.54513	5.08803	3.30116	7.33276	8.68105	1.39961		2.39468	6.04231	5.48985	4.16833	6.52255	6.833	0		2.67	4.33622	4.63697	3.34	7.33859	8.75192	0.17
																2.7526	4.54748	4.17026	3.20249	7.96783	8.61506	1.13639		2.4435	5.97482	4.94339	3.98839	7.17003	6.77855	0		2.73	4.38159	3.81209	3.23333	7.97246	8.67134	0.16
																2.58096	4.72713	4.49452	3.19806	8.62578	8.29073	1.0457		2.2642	6.06575	5.53633	3.91066	7.84097	6.47257	0		2.56	4.57325	4.16228	3.22667	8.63008	8.34293	0.14
																2.71525	4.80592	3.65441	3.29919	9.10117	8.19066	0.75875		2.39231	6.06542	4.92867	3.94108	8.3289	6.3879	0		2.7	4.694	3.41276	3.32	9.10429	8.22863	0.1
																2.74053	4.82507	2.32583	3.2023	9.79644	8.07197	0.544804		2.41012	5.98898	3.74054	3.78262	9.03725	6.29225	0		2.73	4.7478	2.15899	3.21667	9.79859	8.09818	0.09
																2.57789	4.83952	2.40923	3.30257	10.4596	8.05522	0.430859		2.24034	5.89964	3.89953	3.82895	9.71394	6.30443	0		2.57	4.78161	2.28419	3.31333	10.4612	8.07487	0.09
																2.94366	4.86548	2.44641	3.20501	10.5267	7.8659	0.228041		2.60103	5.82698	3.9827	3.6822	9.79475	6.14534	0		2.94	4.83863	2.38844	3.21	10.5275	7.87501	0.07
																3.13285	4.63951	2.69581	3.20278	10.5502	7.66771	0.223082		2.78595	5.49704	4.22573	3.63843	9.8323	5.983	0		3.13	4.6186	2.65066	3.20667	10.5508	7.6748	0.1
																3.35524	4.81066	2.45667	3.19618	10.6999	7.6127	0.30654		3.00725	5.57911	3.98475	3.5922	9.99591	5.96176	0		3.35	4.77217	2.37357	3.20333	10.701	7.62576	0.08
																3.20343	4.37658	3.41295	2.99532	10.6115	7.37611	0.218172		2.8587	5.08738	4.9767	3.34983	9.91997	5.74924	0		3.2	4.35141	3.3586	3	10.6122	7.38465	0.07
																3.06788	3.96721	3.37803	2.79924	10.5878	7.21416	0.420621		2.72665	4.62047	4.95193	3.11605	9.90848	5.61259	0		3.06	3.90934	3.25308	2.81	10.5894	7.23379	0.08
																3.37361	3.75748	3.06466	2.70143	10.5885	7.90913	0.657933		3.04005	4.39	4.71149	2.97485	9.91932	6.31919	0		3.36	3.65759	2.84899	2.72	10.5913	7.94302	0.07
																3.42016	4.23595	3.89574	2.50249	10.4531	7.86739	0.951006		3.0975	4.88523	5.68172	2.72491	9.79133	6.27271	0.264769		3.4	4.08797	3.57623	2.53	10.4572	7.9176	0.08
																3.17861	4.7536	4.61855	2.51793	10.2789	7.77654	0.90426		2.86888	5.45834	6.57791	2.68488	9.62084	6.15821	0.426871		3.16	4.61696	4.32352	2.54333	10.2827	7.8229	0.1
																3.01313	3.90001	3.00116	2.43875	10.3957	7.54467	0.697378		2.71198	4.64198	5.06704	2.55506	9.73977	5.90494	0.341699		3	3.80361	2.79303	2.45667	10.3984	7.57737	0.13
																3.2602	3.85167	4.25722	2.44243	10.336	7.38219	1.01275		2.96222	4.58928	6.35321	2.51399	9.68191	5.73425	0.582708		3.24	3.70339	3.93707	2.47	10.3401	7.43249	0.14
																3.5005	3.51084	4.22891	2.46536	10.2457	7.28663	1.04574		3.21004	4.28973	6.41363	2.487	9.58995	5.61118	0.809464		3.48	3.36035	3.90399	2.49333	10.2499	7.33769	0.16
																3.37413	3.08686	3.96355	2.48373	10.3047	7.34497	1.2027		3.08938	3.90344	6.197	2.45928	9.64509	5.64016	1.13997		3.35	2.90971	3.58105	2.51667	10.3096	7.40508	0.16
																3.38771	3.01027	3.74845	2.50218	10.1496	7.28146	1.35734		3.10937	3.88308	6.0233	2.43318	9.48299	5.53721	1.56121		3.36	2.80684	3.30923	2.54	10.1552	7.35047	0.16
																3.36957	3.05333	2.76158	2.41965	10.1091	7.16618	1.40748		3.09774	3.99826	5.05624	2.30945	9.43215	5.37296	1.9439		3.34	2.83629	2.29296	2.46	10.1151	7.23981	0.13
																3.21933	3.22701	2.80185	2.13997	10.1056	7.01841	1.40725		2.95269	4.24647	5.07293	1.99426	9.41534	5.17182	2.26509		3.19	3.01171	2.33698	2.18	10.1116	7.09145	0.14
																2.88978	3.44283	2.32988	2.15935	10.1057	7.16429	1.44688		2.62599	4.52489	4.5234	1.98502	9.39989	5.26613	2.54431		2.86	3.22419	1.85781	2.2	10.1118	7.23847	0.16
																2.91813	3.71315	2.8661	2.10828	10.0681	7.30017	1.37531		2.65608	4.85147	4.95091	1.91045	9.34462	5.3511	2.66992		2.89	3.50667	2.42028	2.14667	10.0738	7.37022	0.16
																2.87688	3.61629	2.60965	2.35665	10.0613	7.52974	1.32126		2.61462	4.7913	4.54785	2.14103	9.31891	5.53635	2.70912		2.85	3.41899	2.18366	2.39333	10.0668	7.59668	0.16
																2.73626	3.32935	1.93651	2.50416	10.2896	7.75275	1.27455		2.47299	4.52641	3.71316	2.27441	9.52738	5.72085	2.68966		2.71	3.13659	1.52032	2.54	10.2949	7.81815	0.14
																2.98631	2.80512	2.20565	2.25409	10.5848	8.05199	1.28699		2.72215	4.01555	3.82261	2.01228	9.80186	5.98569	2.70096		2.96	2.61195	1.78856	2.29	10.5902	8.11753	0.15
																3.01471	2.76851	3.23182	2.09263	10.8175	8.4057	1.63954		2.75038	3.98927	4.70078	1.83993	10.0129	6.30718	3.05441		2.98	2.51374	2.68174	2.14	10.8246	8.49214	0.14
																2.92728	2.32931	2.37012	2.23912	11.0589	8.84138	1.76094		2.66851	3.61238	3.76563	1.97154	10.2292	6.69074	3.45442		2.89	2.05561	1.77917	2.29	11.0666	8.93424	0.15
																2.61163	2.82186	2.31433	2.16985	11.349	8.95051	1.90866		2.35812	4.17509	3.61594	1.89189	10.4916	6.74281	3.89673		2.57	2.51627	1.65452	2.22667	11.3575	9.05419	0.11
																2.70662	3.21501	2.48028	2.21336	11.5144	9.17127	1.67217		2.45905	4.65643	3.6801	1.92872	10.6264	6.89747	4.02077		2.67	2.9462	1.89989	2.26333	11.5219	9.26247	0.09
																2.75232	3.14787	1.64039	2.05588	11.8045	9.38906	1.48664		2.50511	4.63184	2.64865	1.77522	10.8859	7.06514	3.93185		2.72	2.91058	1.12805	2.1	11.8112	9.46956	0.09
																2.67468	3.20892	2.82403	1.98934	11.9859	9.51963	1.57834		2.42495	4.69953	3.60594	1.7182	11.0373	7.16042	3.94181		2.64	2.95435	2.27439	2.03667	11.993	9.606	0.08
																2.86418	3.01187	3.32775	2.02668	12.2023	9.815	1.55699		2.61459	4.52107	3.93098	1.76334	11.2227	7.41785	3.9247		2.83	2.76093	2.78594	2.07333	12.2093	9.90014	0.08
																2.77583	3.14595	2.9896	2.0611	12.4517	10.063	1.63809		2.52639	4.66596	3.42259	1.807	11.441	7.63223	3.98267		2.74	2.88293	2.42171	2.11	12.4591	10.1523	0.09
																2.66466	3.40435	2.78819	1.79936	12.6289	10.2051	1.57754		2.41687	4.9425	3.07964	1.55406	11.5863	7.73913	3.95002		2.63	3.14992	2.23884	1.84667	12.636	10.2914	0.08
																2.37455	3.64124	2.77491	1.63619	12.8884	10.5613	1.58264		2.12766	5.18578	2.92161	1.4018	11.8142	8.06563	3.92929		2.34	3.38764	2.22736	1.68333	12.8955	10.6473	0.09
																2.55478	3.01983	2.36282	1.57253	13.1698	10.8333	1.5729		2.3091	4.56744	2.37867	1.34953	12.0639	8.31064	3.88868		2.52	2.76449	1.8115	1.62	13.1769	10.92	0.07
																2.48108	3.20734	2.79557	1.69394	13.3058	10.8945	1.84481		2.2371	4.75757	2.69704	1.48241	12.1682	8.34622	4.13854		2.44	2.9058	2.14451	1.75	13.3142	10.9968	0.07
																2.3676	3.98042	3.31712	1.72869	13.452	11.0596	1.70446		2.12937	5.57262	3.16453	1.52508	12.2809	8.47113	4.18341		2.33	3.70443	2.72121	1.78	13.4597	11.1533	0.08
																2.25981	4.65594	3.46891	1.26932	13.5684	11.164	1.37779		2.02359	6.26095	3.20965	1.07969	12.3645	8.54603	3.87456		2.23	4.43715	2.99651	1.31	13.5745	11.2383	0.09
																2.30849	4.68948	3.69999	1.39446	13.5954	11.1276	1.32077		2.06938	6.25327	3.27942	1.22454	12.3613	8.50249	3.56533		2.28	4.48037	3.2485	1.43333	13.6012	11.1985	0.09
																2.29621	5.05718	3.80913	1.22089	13.6657	11.1784	1.23254		2.05558	6.57468	3.27016	1.0676	12.4028	8.55153	3.23741		2.27	4.86476	3.39367	1.25667	13.671	11.2437	0.1
																2.17509	5.175	4.45387	1.34576	13.7071	11.1913	1.17393		1.93347	6.6361	3.827	1.2067	12.4172	8.56978	2.92181		2.15	4.99084	4.05625	1.38	13.7122	11.2537	0.09
																2.36183	5.58954	3.57946	1.27021	13.6977	11.0708	1.033		2.12057	6.99339	2.90464	1.14186	12.3823	8.45812	2.55328		2.34	5.42933	3.23354	1.3	13.7022	11.1252	0.09
																2.29893	5.3339	3.33232	1.09416	13.8058	11.2912	0.908091		2.05777	6.66629	2.62556	0.974741	12.467	8.69549	2.15664		2.28	5.19491	3.03222	1.12	13.8097	11.3383	0.09
																2.36345	5.45421	3.56216	0.907993	13.8008	11.2996	1.10331		2.12269	6.70554	2.84844	0.794639	12.4408	8.72778	2.06322		2.34	5.28205	3.19044	0.94	13.8056	11.358	0.09
																2.63493	5.09088	4.08982	1.01931	13.7851	11.278	1.167		2.39953	6.30159	3.45201	0.90424	12.4037	8.7168	2.07444		2.61	4.9079	3.69474	1.05333	13.7902	11.3401	0.09
																2.59666	4.91967	3.64867	0.830279	13.7958	11.3515	1.27199		2.36766	6.10587	3.10201	0.711681	12.3932	8.79495	2.20676		2.57	4.72395	3.22608	0.866667	13.8013	11.4179	0.12
																2.80156	4.86574	3.58851	0.936934	13.7527	11.3236	1.47345		2.57954	6.04327	3.13632	0.814268	12.3286	8.76521	2.50353		2.77	4.63409	3.08835	0.98	13.7592	11.4022	0.11
																2.54141	4.6936	2.25241	0.747128	13.6366	11.1602	1.46728		2.32836	5.89686	1.91103	0.619146	12.1895	8.58531	2.74594		2.51	4.463	1.75451	0.79	13.643	11.2384	0.11
																2.63472	4.68068	1.02475	0.652622	13.6623	11.1447	1.60996		2.42829	5.90667	0.745874	0.523915	12.1919	8.55235	3.08246		2.6	4.42584	0.47452	0.7	13.6694	11.2312	0.11
																2.4662	4.46309	0.400083	0.660597	13.5344	10.9824	1.68404		2.26674	5.73114	0.174219	0.53275	12.0393	8.36319	3.41794		2.43	4.19736	-0.17366	0.71	13.5418	11.0725	0.12
																2.80799	4.70246	-0.339813	0.868152	13.511	10.9118	1.76147		2.61418	6.01723	-0.546405	0.745104	11.9903	8.26176	3.74293		2.77	4.42358	-0.94196	0.92	13.5188	11.0064	0.12
																2.81404	4.40742	-1.09162	0.58355	13.4435	11.0332	1.60058		2.62493	5.77449	-1.30568	0.468858	11.8962	8.34822	3.82434		2.78	4.15757	-1.63108	0.63	13.4505	11.1179	0.13
																3.04087	4.47267	-0.599495	0.484225	13.4507	10.965	1.89577		2.85207	5.85894	-0.889126	0.384911	11.8776	8.25665	4.16366		3	4.17267	-1.24724	0.54	13.4591	11.0668	0.13
																3.02163	4.07057	-0.618063	0.389853	13.4331	10.8884	1.93868		2.83704	5.517	-0.93159	0.302837	11.8321	8.14047	4.45462		2.98	3.76498	-1.27788	0.446667	13.4417	10.9921	0.14
																3.32623	3.98064	-1.21702	0.290237	13.3785	10.8813	2.13756		3.14421	5.48352	-1.58634	0.219734	11.7489	8.09347	4.85249		3.28	3.64126	-1.94979	0.353333	13.3879	10.9964	0.14
																3.22988	3.63574	-1.53278	0.291924	13.378	10.9023	2.27522		3.05156	5.21649	-1.95014	0.238937	11.7181	8.06479	5.275		3.18	3.26957	-2.32339	0.36	13.3882	11.0266	0.12
																3.30274	3.69547	-2.84927	0.391359	13.423	10.8676	2.39865		3.12788	5.36636	-3.32886	0.358989	11.731	7.97333	5.71244		3.25	3.30833	-3.68516	0.463333	13.4338	10.999	0.12
																3.2386	3.73179	-3.20486	0.300345	13.4036	10.9138	2.33968		3.06621	5.49798	-3.77078	0.292703	11.678	7.95839	5.95828		3.19	3.37506	-3.97509	0.366667	13.4136	11.0349	0.24
																3.55928	3.98285	-1.9068	0.202749	13.3963	10.8853	2.46912		3.38417	5.80269	-2.63373	0.228074	11.638	7.88323	6.14973		3.51	3.62112	-2.68783	0.27	13.4064	11.008	0.34
																3.64943	4.23377	-2.1348	0.205874	13.4221	10.948	2.51571		3.47143	6.10177	-3.01567	0.265142	11.6311	7.90176	6.23199		3.6	3.87092	-2.91825	0.273333	13.4322	11.0711	0.38
																3.3988	3.55685	-2.59915	0.31007	13.2623	10.7792	2.46838		3.21751	5.4648	-3.62734	0.404033	11.4389	7.69235	6.18314		3.35	3.19864	-3.37258	0.376667	13.2723	10.9007	0.36
																3.01253	4.09489	-1.85721	0.308307	13.1993	10.674	2.63974		2.82733	6.03057	-3.02663	0.437453	11.3441	7.55219	6.29971		2.96	3.70926	-2.68983	0.38	13.2101	10.8048	0.37
																2.88706	3.85292	-1.62412	0.115776	13.2197	10.6284	2.40328		2.70033	5.83431	-2.88708	0.276884	11.3323	7.46538	6.11379		2.84	3.50747	-2.37	0.18	13.2293	10.7456	0.37
																3.09026	4.16149	-0.882978	0.211411	13.1699	10.6028	2.55145		2.89778	6.14449	-2.28302	0.408674	11.2525	7.41613	6.08901		3.04	3.79256	-1.67954	0.28	13.1802	10.7279	0.38
																2.80691	3.86265	-1.27178	0.115981	13.1798	10.6036	2.41678		2.61166	5.86525	-2.74648	0.344255	11.2327	7.38809	5.90085		2.76	3.5183	-2.01527	0.18	13.1894	10.7204	0.39
																2.70989	3.97931	-1.19359	0.211906	13.0799	10.4719	2.5558		2.50971	5.97501	-2.75472	0.47206	11.1048	7.2388	5.86322		2.66	3.61304	-1.98441	0.28	13.0901	10.5961	0.4
																2.75779	4.47173	-0.97569	0.314784	13.0202	10.399	2.46469		2.55541	6.47886	-2.56552	0.601554	11.0174	7.14278	5.71424		2.71	4.12094	-1.73309	0.38	13.03	10.518	0.4
																2.5821	4.56479	-0.591709	0.222548	13.0591	10.4551	2.21889		2.37609	6.56661	-2.21507	0.535799	11.0301	7.18285	5.33457		2.54	4.25576	-1.25894	0.28	13.0677	10.56	0.4
																2.38137	4.56393	-0.223211	0.0235345	12.9468	10.3209	2.19765		2.16876	6.52255	-1.89962	0.363931	10.8948	7.04895	5.00615		2.34	4.26021	-0.87898	0.08	12.9553	10.424	0.41
																2.42022	4.8994	1.14402	0.0251142	12.9123	10.3252	2.27764		2.20255	6.81432	-0.537242	0.38714	10.8389	7.05649	4.81646		2.38	4.60418	0.5066	0.08	12.9205	10.4254	0.54
																2.24699	5.2098	0.108729	0.029512	12.8968	10.3289	2.2484		2.02519	7.07836	-1.54204	0.408482	10.8041	7.0666	4.53687		2.21	4.93823	-0.47762	0.08	12.9044	10.421	0.65
																2.31585	4.51969	0.386924	0.0277436	12.8686	10.3917	2.20886		2.08939	6.32661	-1.21944	0.420509	10.759	7.1439	4.19808		2.28	4.25654	-0.18125	0.0766667	12.8759	10.481	0.66
																2.31956	5.16959	1.79118	-0.280657	12.7835	10.3103	2.4993		2.08963	6.91546	0.266088	0.120564	10.659	7.07896	4.22567		2.28	4.87918	1.16415	-0.226667	12.7916	10.4088	0.79
																2.31717	4.68452	2.52229	-0.280732	12.8203	10.3448	2.50612		2.08762	6.40214	1.14416	0.121218	10.6812	7.1186	4.16208		2.28	4.41164	1.93311	-0.23	12.8279	10.4374	0.9
																2.383	4.4981	2.75933	-0.285356	12.7067	10.1864	2.76806		2.15232	6.17683	1.51114	0.116716	10.5545	6.96938	4.29978		2.34	4.18242	2.07773	-0.226667	12.7155	10.2935	0.91
																2.10214	4.15272	2.45642	-0.380839	12.6455	10.1532	2.86057		1.87439	5.83693	1.39429	0.0147906	10.4792	6.92798	4.49968		2.06	3.84341	1.78857	-0.323333	12.6541	10.2581	1.04
																2.13581	4.26117	2.17213	-0.382515	12.6472	10.1548	3.12917		1.90906	5.94618	1.25918	0.00833596	10.4673	6.92145	4.82865		2.09	3.92491	1.4461	-0.32	12.6566	10.2689	1.15
																2.23709	4.21821	1.85374	-0.28427	12.5721	10.0237	3.19474		2.0127	5.92925	1.0983	0.0999355	10.3776	6.77074	5.06665		2.19	3.87251	1.10733	-0.22	12.5818	10.141	1.16
																2.0169	4.54931	1.96529	-0.484	12.5099	9.98969	3.1762		1.79387	6.29273	1.33861	-0.104797	10.3002	6.71221	5.22364		1.97	4.20506	1.22201	-0.42	12.5195	10.1065	1.15
																1.9857	4.66933	3.37869	-0.582363	12.4991	10.0086	3.12434		1.76223	6.44061	2.84223	-0.205465	10.2739	6.70632	5.29712		1.94	4.33389	2.65443	-0.52	12.5084	10.1224	1.15
																1.89517	5.09257	4.11868	-0.481646	12.358	9.86217	3.11164		1.66936	6.8808	3.63715	-0.104557	10.1177	6.5378	5.33593		1.85	4.76099	3.40275	-0.42	12.3673	9.97467	1.16
																1.85679	4.7966	3.48441	-0.570216	12.3151	9.92257	2.88979		1.62784	6.59634	3.04218	-0.192104	10.0599	6.57755	5.13058		1.82	4.5265	2.90122	-0.52	12.3227	10.0142	1.3
																1.58057	4.60361	3.46905	-0.575367	12.1795	9.81955	3.16287		1.3432	6.35869	2.99707	-0.191179	9.91218	6.47601	5.13439		1.54	4.3058	2.82604	-0.52	12.1878	9.92059	1.41
																1.68403	4.61537	4.37764	-0.580087	12.0809	9.71074	3.32231		1.44286	6.35581	3.95143	-0.197261	9.80121	6.35906	5.21252		1.64	4.29217	3.67981	-0.52	12.0899	9.82039	1.42
																1.94224	4.64843	4.29595	-0.677649	12.0659	9.69095	3.33512		1.69999	6.39903	3.95254	-0.300157	9.7731	6.32161	5.27864		1.9	4.33834	3.62643	-0.62	12.0746	9.79615	1.51
																1.76103	4.85436	4.45652	-0.775996	11.8915	9.56117	3.46277		1.51606	6.60278	4.16816	-0.402205	9.58606	6.17822	5.38827		1.72	4.55317	3.80621	-0.72	11.8999	9.66336	1.69
																2.04325	5.23907	3.64176	-0.879026	11.6597	9.37737	3.5687		1.79493	6.97807	3.39869	-0.508874	9.34228	5.98355	5.44105		2	4.92158	2.95626	-0.82	11.6686	9.48509	1.7
																2.01955	5.3777	4.16662	-0.673972	11.5936	9.30308	3.5287		1.76967	7.12336	3.99183	-0.310103	9.26364	5.89214	5.43533		1.98	5.0874	3.53981	-0.62	11.6017	9.40158	1.82
																1.86574	5.65125	4.69127	-0.768771	11.4282	9.20414	3.45405		1.61173	7.37908	4.54643	-0.408635	9.08681	5.78525	5.26568		1.83	5.38892	4.12486	-0.72	11.4355	9.29314	1.91
																1.94573	5.68618	5.98804	-0.865428	11.2561	9.08963	3.45375		1.68611	7.37387	5.85778	-0.508662	8.90491	5.6724	5.07		1.91	5.4239	5.42174	-0.816667	11.2634	9.17861	1.91
																1.86569	4.97937	6.14862	-0.962046	11.1796	9.00154	3.4922		1.60217	6.63236	6.06418	-0.612395	8.81926	5.58543	4.96567		1.83	4.71735	5.58289	-0.913333	11.1869	9.09044	1.95
																1.95803	5.34082	4.7874	-0.861903	10.9195	8.90223	3.83321		1.6918	6.96404	4.76899	-0.522183	8.55035	5.4863	5.20567		1.92	5.06164	4.18462	-0.81	10.9273	8.99695	2.19

## Sheet: OptimalControlAnalysis_VAR
VAR
y1sc							ydsc							Summary1c					Summary1d
s	p	ip	u	TS	PS	R	s	p	ip	u	TS	PS	R	ME: A	MAX EIG: A-Bu	MAX EIG: FINAL	Piter	Controllability	ME: A	MAX EIG: A-Bu	MAX EIG: FINAL	Piter	Controllability
1.11	11.6517	1.41123	-0.226667	4.20751	1.58223	10.94	1.11	11.6517	1.41123	-0.226667	4.20751	1.58223	10.94	0	0	0	0	0	0	0	0	0	0
1.02214	11.8863	0.0294145	-0.217078	4.22473	1.75078	8.06604	1.02214	11.8863	0.0294145	-0.217078	4.22473	1.75078	8.06604	0.996711	0.993404	0.993404	0	6	0.996711	0.993404	0.993404	0	6
0.551196	10.9639	-1.0262	-0.0442145	4.22829	1.82604	8.20479	0.503851	10.4554	-1.62336	0.00351208	4.25401	2.02999	5.63673	0.996711	0.993404	0.993404	0	6	0.996711	0.993404	0.993404	0	6
1.54221	11.4367	-0.907824	-0.22748	4.24712	1.75741	10.2509	1.43889	10.149	-2.03211	-0.146279	4.32316	2.29919	4.0913	0.996711	0.993404	0.993404	0	6	0.996711	0.993404	0.993404	0	6
1.64029	10.6879	-1.66108	-0.0975668	4.09576	1.85166	9.90388	1.54875	9.11972	-2.22231	-0.0845621	4.21311	2.56542	3.13112	0.996711	0.993404	0.993404	0	6	0.996711	0.993404	0.993404	0	6
1.21606	12.4298	-0.307425	0.180915	4.04685	1.62629	10.6251	1.12704	10.4837	-0.414244	0.126845	4.21505	2.55415	2.78418	0.996711	0.993404	0.993404	0	6	0.996711	0.993404	0.993404	0	6
0.750027	11.3626	-1.2568	0.219772	4.04223	1.77735	9.81047	0.681594	9.19977	-0.646208	0.0687339	4.25957	2.86244	1.81232	0.996711	0.993404	0.993404	0	6	0.996711	0.993404	0.993404	0	6
1.65251	10.4035	-2.81172	0.301603	4.24824	1.8978	10.3853	1.58962	7.8938	-1.70778	0.0654947	4.52392	3.19106	1.54406	0.996711	0.993404	0.993404	0	6	0.996711	0.993404	0.993404	0	6
3.32707	9.43679	-2.87396	0.83048	4.26886	1.84115	13.1625	3.24202	6.25989	-1.6139	0.528658	4.62431	3.47703	1.92678	0.996711	0.993404	0.993404	0	6	0.996711	0.993404	0.993404	0	6
2.98742	9.5596	-3.33893	1.20132	4.28854	1.50006	13.8931	2.93442	6.16707	-1.12323	0.75707	4.71276	3.31875	2.81558	0.996711	0.993404	0.993404	0	6	0.996711	0.993404	0.993404	0	6
2.59881	8.92615	-5.92945	1.42558	4.22889	1.4698	8.5546	2.68012	6.47456	-1.54288	0.736147	4.66486	3.00283	3.39338	0.996711	0.993404	0.993404	0	6	0.996711	0.993404	0.993404	0	6
1.8478	9.84091	-6.86963	1.65759	4.19481	1.57614	7.20673	1.95874	7.65275	-2.10688	0.881419	4.65325	3.03451	3.69544	0.996711	0.993404	0.993404	0	6	0.996711	0.993404	0.993404	0	6
1.52324	8.60959	-6.44736	1.60476	4.10918	1.64245	6.2935	1.6393	6.51935	-1.76079	0.785221	4.59067	3.07758	3.3722	0.996711	0.993404	0.993404	0	6	0.996711	0.993404	0.993404	0	6
1.75446	8.34444	-5.15779	1.41675	4.11988	1.69209	7.1739	1.85232	6.11492	-0.899168	0.587246	4.63258	3.19542	3.57577	0.996711	0.993404	0.993404	0	6	0.996711	0.993404	0.993404	0	6
1.66788	9.94118	-4.73301	1.43936	4.05752	1.72176	8.39787	1.75077	7.53132	-0.825711	0.595191	4.60497	3.31873	4.01999	0.996711	0.993404	0.993404	0	6	0.996711	0.993404	0.993404	0	6
1.76922	9.12066	-3.73499	1.50911	3.9613	1.91373	9.33538	1.83599	6.44491	-0.151541	0.648281	4.55011	3.64809	3.8576	0.996711	0.993404	0.993404	0	6	0.996711	0.993404	0.993404	0	6
2.55133	9.96171	-3.44158	1.22321	3.90838	1.99511	12.0445	2.5837	6.73684	-0.350948	0.357528	4.55688	3.99256	4.18464	0.996711	0.993404	0.993404	0	6	0.996711	0.993404	0.993404	0	6
2.24278	9.38788	-3.63078	1.45633	3.70732	1.64179	14.4473	2.25804	5.63356	-0.66871	0.549636	4.42444	3.91862	4.61563	0.996711	0.993404	0.993404	0	6	0.996711	0.993404	0.993404	0	6
1.91346	10.5492	-2.82407	1.24956	3.72309	1.56959	14.7832	1.96084	6.67462	0.735718	0.236037	4.49712	3.98069	5.28454	0.996711	0.993404	0.993404	0	6	0.996711	0.993404	0.993404	0	6
2.14758	10.9397	-2.54107	1.30186	3.77629	1.65142	12.003	2.27378	7.49825	2.13996	0.138278	4.57899	3.97035	5.54968	0.996711	0.993404	0.993404	0	6	0.996711	0.993404	0.993404	0	6
1.33477	11.4948	-1.77087	1.17726	3.81921	2.12776	10.7412	1.49243	8.2097	3.18242	-0.0597658	4.65244	4.43489	5.49633	0.996711	0.993404	0.993404	0	6	0.996711	0.993404	0.993404	0	6
2.28273	11.3419	0.508975	1.55162	3.70202	1.88333	11.2926	2.43123	7.85314	5.11603	0.296608	4.57843	4.31245	5.2706	0.996711	0.993404	0.993404	0	6	0.996711	0.993404	0.993404	0	6
1.80742	11.5762	2.85303	1.5076	3.7249	1.77416	13.3718	1.92409	7.57027	6.8686	0.254793	4.66285	4.46071	5.09674	0.996711	0.993404	0.993404	0	6	0.996711	0.993404	0.993404	0	6
1.37833	10.2682	4.54009	1.19605	3.73199	1.74362	13.783	1.50569	6.03778	8.64162	-0.113892	4.72584	4.59398	5.03147	0.996711	0.993404	0.993404	0	6	0.996711	0.993404	0.993404	0	6
0.849824	10.9093	4.80354	1.34275	3.77572	1.48975	14.3558	0.999827	6.56021	9.14796	-0.0381752	4.82256	4.46659	5.70533	0.996711	0.993404	0.993404	0	6	0.996711	0.993404	0.993404	0	6
1.01445	9.90912	2.73254	1.52613	3.81083	1.54191	13.0376	1.21262	5.73437	7.60626	0.0518461	4.89593	4.52701	5.93254	0.996711	0.993404	0.993404	0	6	0.996711	0.993404	0.993404	0	6
2.40409	7.5216	0.570849	1.84359	3.71874	1.55612	11.8003	2.64722	3.6024	5.79871	0.295796	4.83181	4.50228	6.42419	0.996711	0.993404	0.993404	0	6	0.996711	0.993404	0.993404	0	6
3.23067	7.65639	-1.56237	2.18336	3.86367	1.44197	12.0428	3.49922	3.89752	3.63582	0.600971	5.00195	4.37192	7.67692	0.996711	0.993404	0.993404	0	6	0.996711	0.993404	0.993404	0	6
2.52749	7.09192	-3.4026	2.40469	3.91504	1.63906	10.5331	2.84314	3.7781	1.96315	0.779467	5.05909	4.43116	8.4871	0.996711	0.993404	0.993404	0	6	0.996711	0.993404	0.993404	0	6
2.8812	6.2183	-5.36786	2.55755	3.88082	1.68205	9.81511	3.2179	3.20717	-0.323331	0.941275	5.02698	4.3734	9.07344	0.996711	0.993404	0.993404	0	6	0.996711	0.993404	0.993404	0	6
3.05661	6.58546	-3.24627	2.88078	3.85241	1.52615	10.7451	3.38334	3.59682	1.01104	1.32188	5.00772	4.22016	9.74768	0.996711	0.993404	0.993404	0	6	0.996711	0.993404	0.993404	0	6
2.57013	5.85633	-4.13669	2.95202	3.75719	1.56241	11.6612	2.88245	2.78387	-0.67942	1.45809	4.92638	4.30842	9.9412	0.996711	0.993404	0.993404	0	6	0.996711	0.993404	0.993404	0	6
2.83909	5.88045	-4.5821	3.25677	3.86108	1.75113	11.8763	3.15919	2.88064	-1.5693	1.80341	5.03802	4.49712	10.3505	0.996711	0.993404	0.993404	0	6	0.996711	0.993404	0.993404	0	6
2.87263	6.4082	-5.55322	3.34163	3.86305	1.37423	11.9713	3.19915	3.45985	-2.99292	1.93528	5.04725	4.1296	10.5272	0.996711	0.993404	0.993404	0	6	0.996711	0.993404	0.993404	0	6
2.41409	5.3885	-6.4551	3.55662	3.79919	1.48873	11.3023	2.75527	2.56816	-4.22497	2.19264	4.98589	4.22464	10.335	0.996711	0.993404	0.993404	0	6	0.996711	0.993404	0.993404	0	6
3.09059	6.48303	-6.78431	3.71014	3.95496	1.35004	11.3192	3.43753	3.71388	-5.00461	2.40422	5.14564	4.09502	10.3941	0.996711	0.993404	0.993404	0	6	0.996711	0.993404	0.993404	0	6
3.49893	5.69014	-7.30235	3.68844	3.99048	1.31317	9.64186	3.87379	3.19831	-5.66872	2.42087	5.17322	3.97854	9.91305	0.996711	0.993404	0.993404	0	6	0.996711	0.993404	0.993404	0	6
3.84645	6.68396	-7.71138	4.04975	3.85423	1.41358	7.99613	4.25003	4.54963	-6.26858	2.83218	5.01976	3.95756	9.7243	0.996711	0.993404	0.993404	0	6	0.996711	0.993404	0.993404	0	6
3.97021	7.87833	-7.85662	4.34795	3.90738	1.42325	7.5589	4.36414	5.77262	-7.15528	3.23403	5.06578	3.9659	8.91051	0.996711	0.993404	0.993404	0	6	0.996711	0.993404	0.993404	0	6
3.44688	8.60497	-7.36279	4.76947	3.94238	1.4552	6.47289	3.83692	6.53892	-7.26104	3.75213	5.0941	3.99878	7.58408	0.996711	0.993404	0.993404	0	6	0.996711	0.993404	0.993404	0	6
3.69965	8.09886	-7.28893	4.79632	3.92397	1.73231	5.47851	4.07948	5.97177	-7.80882	3.88095	5.07492	4.32192	5.89613	0.996711	0.993404	0.993404	0	6	0.996711	0.993404	0.993404	0	6
3.06601	8.31469	-3.42467	4.39098	3.84773	1.53315	5.4831	3.43053	6.01366	-4.54305	3.577	5.00672	4.22275	4.74779	0.996711	0.993404	0.993404	0	6	0.996711	0.993404	0.993404	0	6
3.60517	7.15897	-5.92781	4.39546	3.83357	1.66288	5.27677	3.96722	4.74067	-7.36771	3.65926	5.00321	4.44229	3.83886	0.996711	0.993404	0.993404	0	6	0.996711	0.993404	0.993404	0	6
2.91837	8.30279	-4.3665	4.29443	3.81465	1.4578	5.67502	3.2821	5.77252	-5.99936	3.62426	4.99878	4.33221	3.65425	0.996711	0.993404	0.993404	0	6	0.996711	0.993404	0.993404	0	6
2.94129	9.29732	-2.41863	4.20742	3.85468	1.64922	5.39905	3.3121	6.68765	-4.11344	3.59089	5.05551	4.6112	3.03043	0.996711	0.993404	0.993404	0	6	0.996711	0.993404	0.993404	0	6
2.19775	9.24702	-1.16326	4.11559	3.90968	1.40877	5.07612	2.57269	6.52056	-2.91529	3.55049	5.13218	4.4763	2.20525	0.996711	0.993404	0.993404	0	6	0.996711	0.993404	0.993404	0	6
2.31462	10.4273	-0.433012	4.13683	3.87259	1.45356	4.85911	2.69428	7.575	-2.1853	3.61592	5.12103	4.63458	1.49303	0.996711	0.993404	0.993404	0	6	0.996711	0.993404	0.993404	0	6
1.52117	10.4066	1.20862	3.45853	3.91205	1.42741	4.66767	1.90024	7.35892	-0.565459	2.98039	5.19383	4.75383	0.503232	0.996711	0.993404	0.993404	0	6	0.996711	0.993404	0.993404	0	6
1.55907	10.8115	3.39812	3.54774	3.89319	1.51043	5.1993	1.93476	7.50602	1.6293	3.10565	5.21673	5.01408	0.00717889	0.996711	0.993404	0.993404	0	6	0.996711	0.993404	0.993404	0	6
2.01108	10.2166	5.34723	3.245	3.88229	1.53482	5.17617	2.39555	6.73947	3.81019	2.81488	5.24963	5.18988	0	0.996711	0.993404	0.993404	0	6	0.996711	0.993404	0.993404	0	6
1.62774	10.2269	7.31032	2.83591	3.89989	1.37023	5.49387	2.02471	6.62388	6.01623	2.41662	5.31271	5.16197	0	0.996711	0.993404	0.993404	0	6	0.996711	0.993404	0.993404	0	6
1.89453	9.46893	8.23706	2.52997	3.91678	1.34163	5.6473	2.3089	5.8025	7.26892	2.11061	5.37521	5.24594	0.147264	0.996711	0.993404	0.993404	0	6	0.996711	0.993404	0.993404	0	6
1.84962	10.1427	9.69441	2.32637	3.95857	1.40735	5.99687	2.28374	6.46868	9.07947	1.90143	5.46163	5.39955	0.750399	0.996711	0.993404	0.993404	0	6	0.996711	0.993404	0.993404	0	6
1.89634	10.6738	9.70133	2.03418	3.84767	1.44382	5.94509	2.34962	7.02977	9.41013	1.60391	5.39399	5.50424	1.08685	0.996711	0.993404	0.993404	0	6	0.996711	0.993404	0.993404	0	6
1.46652	9.79142	10.8949	1.83726	3.59017	1.35944	5.98309	1.93248	6.15514	10.8145	1.40958	5.18062	5.49145	1.33059	0.996711	0.993404	0.993404	0	6	0.996711	0.993404	0.993404	0	6
1.37937	9.79487	10.5745	1.83671	3.68048	1.27685	6.42607	1.85551	6.16846	10.6567	1.41435	5.31519	5.47621	1.94892	0.996711	0.993404	0.993404	0	6	0.996711	0.993404	0.993404	0	6
1.40599	9.76332	9.8805	1.74465	3.87837	1.53866	6.66034	1.89192	6.16554	10.1061	1.32829	5.55657	5.79498	2.41858	0.996711	0.993404	0.993404	0	6	0.996711	0.993404	0.993404	0	6
0.754172	9.62191	9.76334	1.43682	3.82512	1.34251	7.0437	1.24532	6.02816	10.0572	1.0321	5.54786	5.66236	2.87256	0.996711	0.993404	0.993404	0	6	0.996711	0.993404	0.993404	0	6
1.12101	8.99528	9.28076	1.25811	3.785	1.31274	7.21515	1.62138	5.45886	9.68849	0.860748	5.54993	5.67323	3.36786	0.996711	0.993404	0.993404	0	6	0.996711	0.993404	0.993404	0	6
2.16891	7.73189	8.25648	1.53703	3.6913	1.32783	8.15823	2.66738	4.16006	8.61558	1.16033	5.50229	5.76222	4.11755	0.996711	0.993404	0.993404	0	6	0.996711	0.993404	0.993404	0	6
1.77458	7.78562	7.23675	1.53261	3.64383	1.31308	8.81361	2.28352	4.2991	7.71871	1.1618	5.49601	5.77428	5.2124	0.996711	0.993404	0.993404	0	6	0.996711	0.993404	0.993404	0	6
1.8298	8.15003	5.66864	1.31518	3.7291	1.31192	9.13084	2.34856	4.77541	6.23583	0.954103	5.6197	5.78422	6.0406	0.996711	0.993404	0.993404	0	6	0.996711	0.993404	0.993404	0	6
2.12395	7.1764	5.01061	1.38556	3.57815	1.25164	8.86426	2.65719	3.9984	5.68958	1.0336	5.50097	5.69556	6.64421	0.996711	0.993404	0.993404	0	6	0.996711	0.993404	0.993404	0	6
1.87236	8.46461	5.01978	1.19106	3.72269	1.21913	8.23556	2.42712	5.61504	5.84517	0.848597	5.66743	5.57295	7.43853	0.996711	0.993404	0.993404	0	6	0.996711	0.993404	0.993404	0	6
1.82541	7.71558	4.65148	1.29022	3.84825	1.13885	7.31772	2.38842	5.14044	5.36791	0.983385	5.81137	5.4103	7.49062	0.996711	0.993404	0.993404	0	6	0.996711	0.993404	0.993404	0	6
2.05088	7.95457	2.19883	1.31338	3.68205	1.1857	6.65992	2.6158	5.63427	2.67845	1.05771	5.65975	5.37377	7.5939	0.996711	0.993404	0.993404	0	6	0.996711	0.993404	0.993404	0	6
1.27553	9.54668	2.02673	1.22402	3.66646	1.1753	6.57876	1.82715	7.34763	2.04959	1.04224	5.66139	5.32703	7.5226	0.996711	0.993404	0.993404	0	6	0.996711	0.993404	0.993404	0	6
1.98163	8.49154	1.4675	1.24633	3.73668	1.16469	6.05782	2.5167	6.35537	1.02168	1.14224	5.75079	5.30442	6.74409	0.996711	0.993404	0.993404	0	6	0.996711	0.993404	0.993404	0	6
2.05979	7.9246	0.827423	1.32487	3.88999	1.17975	6.53282	2.5719	5.74465	-0.120706	1.30256	5.92899	5.35351	6.48316	0.996711	0.993404	0.993404	0	6	0.996711	0.993404	0.993404	0	6
2.83578	8.71629	0.606783	1.22003	3.81497	1.15284	6.49157	3.34181	6.60939	-0.551342	1.2552	5.87557	5.32133	6.41568	0.996711	0.993404	0.993404	0	6	0.996711	0.993404	0.993404	0	6
2.11661	7.52056	0.333615	1.42224	3.82402	1.08999	6.08729	2.6195	5.51155	-0.972333	1.51027	5.90493	5.24317	6.12756	0.996711	0.993404	0.993404	0	6	0.996711	0.993404	0.993404	0	6
1.81676	8.54576	-0.794033	1.43901	3.81792	1.20158	6.01193	2.31499	6.62307	-2.2529	1.58084	5.91917	5.34244	6.10626	0.996711	0.993404	0.993404	0	6	0.996711	0.993404	0.993404	0	6
2.17327	9.20635	-0.530484	1.14711	3.82116	1.15764	5.88085	2.65931	7.2902	-2.21874	1.34906	5.94651	5.31707	5.63048	0.996711	0.993404	0.993404	0	6	0.996711	0.993404	0.993404	0	6
2.12091	9.93646	0.0427399	1.15366	3.86995	1.25588	5.79912	2.59454	7.99844	-1.83231	1.41097	6.02228	5.44804	5.11727	0.996711	0.993404	0.993404	0	6	0.996711	0.993404	0.993404	0	6
2.29294	8.45012	-0.335364	1.16787	3.65477	1.18828	5.52473	2.75524	6.4737	-2.33481	1.4734	5.8369	5.4231	4.39236	0.996711	0.993404	0.993404	0	6	0.996711	0.993404	0.993404	0	6
2.3565	7.44684	-0.178164	1.05271	3.76872	1.18289	6.17031	2.80519	5.38186	-2.284	1.40222	5.9854	5.48369	4.39708	0.996711	0.993404	0.993404	0	6	0.996711	0.993404	0.993404	0	6
2.54318	8.5851	0.866642	1.04692	3.96887	1.24039	6.67893	2.99069	6.52911	-1.13273	1.41946	6.21834	5.57287	4.8422	0.996711	0.993404	0.993404	0	6	0.996711	0.993404	0.993404	0	6
2.32027	7.66235	1.46283	0.754225	3.95985	1.22844	6.42329	2.76974	5.65742	-0.379026	1.1431	6.24086	5.57451	4.7382	0.996711	0.993404	0.993404	0	6	0.996711	0.993404	0.993404	0	6
2.95502	6.61006	0.659968	1.23742	3.89572	1.09103	6.7809	3.40202	4.63064	-1.08532	1.64563	6.20946	5.45766	5.09243	0.996711	0.993404	0.993404	0	6	0.996711	0.993404	0.993404	0	6
3.09433	6.49629	-0.0388172	1.22805	3.84379	1.16182	6.80311	3.54669	4.63503	-1.58317	1.64509	6.18599	5.51022	5.57573	0.996711	0.993404	0.993404	0	6	0.996711	0.993404	0.993404	0	6
2.80108	6.54105	0.380788	1.12217	3.83679	1.33049	6.60475	3.25937	4.84373	-0.983029	1.54913	6.2035	5.63613	6.00464	0.996711	0.993404	0.993404	0	6	0.996711	0.993404	0.993404	0	6
2.22626	5.87375	0.37222	1.23542	3.97773	1.18256	6.25622	2.68825	4.36298	-0.876529	1.67803	6.36523	5.42885	6.31438	0.996711	0.993404	0.993404	0	6	0.996711	0.993404	0.993404	0	6
2.97391	6.28848	-0.0678298	1.2453	3.96879	1.07168	6.22459	3.43025	4.90735	-1.35608	1.71711	6.37698	5.27392	6.57138	0.996711	0.993404	0.993404	0	6	0.996711	0.993404	0.993404	0	6
2.81082	6.02678	1.25633	1.04253	3.99748	1.07217	6.16321	3.25702	4.74036	-0.135799	1.54917	6.42648	5.24077	6.59424	0.996711	0.993404	0.993404	0	6	0.996711	0.993404	0.993404	0	6
3.22727	5.30316	0.81265	0.937062	4.01358	1.03524	6.05196	3.66624	4.14096	-0.638953	1.47486	6.46104	5.15684	6.71707	0.996711	0.993404	0.993404	0	6	0.996711	0.993404	0.993404	0	6
2.75505	6.37407	0.707364	1.02977	4.01207	1.09508	6.1082	3.18805	5.35905	-0.790541	1.59798	6.47533	5.15738	7.104	0.996711	0.993404	0.993404	0	6	0.996711	0.993404	0.993404	0	6
2.88988	6.35218	1.36272	1.05381	4.04495	1.0671	5.41285	3.31811	5.51294	-0.174894	1.65256	6.52061	5.0546	6.85266	0.996711	0.993404	0.993404	0	6	0.996711	0.993404	0.993404	0	6
2.90356	5.5558	1.39104	0.965764	4.09872	1.12128	5.32988	3.31329	4.76718	-0.374724	1.6113	6.59058	5.07909	6.53693	0.996711	0.993404	0.993404	0	6	0.996711	0.993404	0.993404	0	6
2.71476	6.42378	1.03273	0.681108	4.20938	1.51795	5.81961	3.10354	5.63313	-0.958192	1.3723	6.72035	5.46888	6.57616	0.996711	0.993404	0.993404	0	6	0.996711	0.993404	0.993404	0	6
2.53842	3.82275	0.631268	0.65215	4.26882	1.18391	6.36193	2.90403	2.96836	-1.56579	1.38539	6.80333	5.15629	6.43069	0.996711	0.993404	0.993404	0	6	0.996711	0.993404	0.993404	0	6
2.47982	6.58121	2.95897	0.629616	3.99671	0.985253	6.9564	2.84166	5.82208	0.860948	1.37701	6.54923	4.92089	7.24191	0.996711	0.993404	0.993404	0	6	0.996711	0.993404	0.993404	0	6
2.08955	6.64169	3.33418	0.677589	4.07367	1.02569	5.67869	2.45761	6.10413	1.45389	1.42844	6.63671	4.87019	6.79367	0.996711	0.993404	0.993404	0	6	0.996711	0.993404	0.993404	0	6
1.8106	7.03876	3.79365	0.396472	4.2608	1.33678	5.53192	2.15824	6.49589	1.74544	1.18269	6.84202	5.17148	6.22536	0.996711	0.993404	0.993404	0	6	0.996711	0.993404	0.993404	0	6
1.99308	6.48303	4.12582	0.410075	4.26546	1.31346	5.68678	2.31778	5.87346	1.91893	1.22855	6.86913	5.1661	5.71678	0.996711	0.993404	0.993404	0	6	0.996711	0.993404	0.993404	0	6
2.12949	7.29961	5.22574	0.291004	4.3392	1.13821	6.27609	2.43156	6.57979	2.91901	1.13332	6.96989	5.03149	5.51931	0.996711	0.993404	0.993404	0	6	0.996711	0.993404	0.993404	0	6
1.93475	7.29813	5.29671	0.200819	4.22656	1.01348	5.92088	2.22997	6.58763	3.14848	1.04153	6.88134	4.90551	5.08892	0.996711	0.993404	0.993404	0	6	0.996711	0.993404	0.993404	0	6
1.77871	7.85448	6.21393	0.115721	4.18263	1.14227	5.81016	2.06373	7.12161	4.18595	0.95478	6.8634	5.04446	4.74982	0.996711	0.993404	0.993404	0	6	0.996711	0.993404	0.993404	0	6
1.6461	4.95675	6.0775	0.0395976	4.27406	1.08029	5.75532	1.91825	4.16543	4.14958	0.875091	6.98352	5.0074	4.31195	0.996711	0.993404	0.993404	0	6	0.996711	0.993404	0.993404	0	6
2.73875	6.86456	7.63225	0.101707	4.22257	1.24553	7.23597	2.99279	5.94057	5.76057	0.933029	6.966	5.22912	5.08214	0.996711	0.993404	0.993404	0	6	0.996711	0.993404	0.993404	0	6
2.24107	7.37706	7.74141	-0.0981254	4.28489	0.917635	6.73618	2.5022	6.55156	6.28593	0.694865	7.05356	4.86995	5.12834	0.996711	0.993404	0.993404	0	6	0.996711	0.993404	0.993404	0	6
2.44297	5.78068	7.07259	-0.170088	4.32984	1.12862	6.03408	2.707	5.05976	5.93048	0.591177	7.12116	5.03954	4.91993	0.996711	0.993404	0.993404	0	6	0.996711	0.993404	0.993404	0	6
2.80826	9.46433	7.68991	-0.187627	4.31488	0.983403	6.75488	3.0594	8.71876	6.61792	0.560388	7.13301	4.89809	5.41147	0.996711	0.993404	0.993404	0	6	0.996711	0.993404	0.993404	0	6
2.43368	7.126	6.3833	-0.147417	4.20903	0.935552	5.44291	2.68299	6.45942	5.52959	0.57278	7.04916	4.81329	4.42483	0.996711	0.993404	0.993404	0	6	0.996711	0.993404	0.993404	0	6
1.98751	8.11193	6.68203	-0.159619	4.17949	0.94516	6.04027	2.21697	7.3553	5.78807	0.55247	7.04824	4.84906	4.44988	0.996711	0.993404	0.993404	0	6	0.996711	0.993404	0.993404	0	6
2.00223	7.17407	6.37652	-0.432102	4.30136	1.05661	5.6702	2.22517	6.42917	5.64308	0.252321	7.1953	4.9503	4.10074	0.996711	0.993404	0.993404	0	6	0.996711	0.993404	0.993404	0	6
1.82324	7.92055	5.72877	-0.240463	4.1256	0.962753	6.36596	2.03003	7.08774	5.0224	0.425002	7.04911	4.88456	4.31028	0.996711	0.993404	0.993404	0	6	0.996711	0.993404	0.993404	0	6
2.14972	7.77371	5.28964	-0.415348	4.25247	1.13241	6.20187	2.35122	6.93711	4.77076	0.214873	7.20274	5.05207	4.14961	0.996711	0.993404	0.993404	0	6	0.996711	0.993404	0.993404	0	6
1.96561	7.83466	4.69717	-0.416715	4.18319	1.00851	6.69622	2.15346	6.90877	4.24689	0.185647	7.16397	4.95882	4.21202	0.996711	0.993404	0.993404	0	6	0.996711	0.993404	0.993404	0	6
1.93355	7.38219	4.25628	-0.207238	4.19194	1.02041	6.86727	2.11512	6.41858	3.98407	0.355158	7.20184	4.98361	4.26722	0.996711	0.993404	0.993404	0	6	0.996711	0.993404	0.993404	0	6
2.00589	7.77119	3.74152	-0.403762	4.22115	1.13304	7.14826	2.18094	6.76397	3.6367	0.11703	7.26042	5.11123	4.41361	0.996711	0.993404	0.993404	0	6	0.996711	0.993404	0.993404	0	6
1.73635	8.73372	2.7573	-0.397725	4.15824	1.00702	7.2782	1.90761	7.70653	2.84686	0.076889	7.22567	4.99073	4.54199	0.996711	0.993404	0.993404	0	6	0.996711	0.993404	0.993404	0	6
1.38815	8.86228	2.24851	-0.479862	4.2131	1.10419	6.97373	1.55611	7.82372	2.52161	-0.0524011	7.30762	5.08875	4.27541	0.996711	0.993404	0.993404	0	6	0.996711	0.993404	0.993404	0	6
1.46852	8.6933	2.09465	-0.460051	4.27525	1.20715	6.9676	1.62819	7.59419	2.46845	-0.0745835	7.39849	5.21085	4.05056	0.996711	0.993404	0.993404	0	6	0.996711	0.993404	0.993404	0	6
1.59906	8.10102	2.3639	-0.354131	4.23563	1.11608	7.35122	1.74694	6.88863	2.79244	-0.00903689	7.39039	5.16131	3.97663	0.996711	0.993404	0.993404	0	6	0.996711	0.993404	0.993404	0	6
1.25443	8.01477	1.54178	-0.554786	4.05886	1.0864	7.82305	1.39528	6.70961	2.09938	-0.258862	7.24529	5.16855	4.15286	0.996711	0.993404	0.993404	0	6	0.996711	0.993404	0.993404	0	6
1.3312	7.02386	1.50025	-0.743713	4.09354	1.04653	8.17355	1.47129	5.67614	2.26658	-0.50584	7.3097	5.14742	4.49551	0.996711	0.993404	0.993404	0	6	0.996711	0.993404	0.993404	0	6
1.57139	8.44443	1.33061	-0.564598	4.20881	1.04615	9.03581	1.70932	7.04246	2.26699	-0.383236	7.45469	5.16957	5.28555	0.996711	0.993404	0.993404	0	6	0.996711	0.993404	0.993404	0	6
1.8285	7.60821	0.555187	-0.540342	3.96977	1.16927	8.44894	1.97778	6.29451	1.81595	-0.429307	7.23775	5.25799	5.35048	0.996711	0.993404	0.993404	0	6	0.996711	0.993404	0.993404	0	6
1.91301	7.35157	0.579622	-0.453483	4.08028	1.2048	8.79602	2.06084	6.03515	1.93661	-0.39338	7.37143	5.28824	5.79793	0.996711	0.993404	0.993404	0	6	0.996711	0.993404	0.993404	0	6
2.03639	7.16967	-0.304748	-0.551426	3.86377	1.18546	8.65197	2.19167	5.94818	1.23674	-0.549129	7.1717	5.22331	6.23525	0.996711	0.993404	0.993404	0	6	0.996711	0.993404	0.993404	0	6
1.6109	7.43316	0.23781	-0.550907	3.78888	1.17795	8.59661	1.7716	6.31932	1.88202	-0.597832	7.10939	5.15937	6.75009	0.996711	0.993404	0.993404	0	6	0.996711	0.993404	0.993404	0	6
1.58266	7.18828	0.024029	-0.433003	3.85289	1.23152	8.27083	1.74771	6.19938	1.70553	-0.521229	7.1814	5.14431	7.01285	0.996711	0.993404	0.993404	0	6	0.996711	0.993404	0.993404	0	6
1.87767	6.35115	-0.457888	-0.433167	3.68901	1.26201	8.30709	2.03814	5.41807	1.09939	-0.546452	7.02507	5.12877	7.22122	0.996711	0.993404	0.993404	0	6	0.996711	0.993404	0.993404	0	6
1.97022	6.21407	-0.0902175	-0.343631	3.95391	1.24558	8.55944	2.12891	5.36154	1.36212	-0.481064	7.29396	5.05569	7.76265	0.996711	0.993404	0.993404	0	6	0.996711	0.993404	0.993404	0	6
1.88685	6.46586	-0.00764728	-0.332365	4.01292	1.31649	8.31382	2.05001	5.76464	1.39631	-0.495565	7.35063	5.0397	8.14032	0.996711	0.993404	0.993404	0	6	0.996711	0.993404	0.993404	0	6
1.50732	7.07052	-0.970837	-0.326348	3.71931	1.26062	8.1144	1.66855	6.47832	0.260566	-0.501211	7.05264	4.90882	8.28377	0.996711	0.993404	0.993404	0	6	0.996711	0.993404	0.993404	0	6
1.61798	6.79825	0.323617	-0.406933	3.71542	1.25899	7.72077	1.77565	6.30202	1.34223	-0.586557	7.04196	4.83536	8.14122	0.996711	0.993404	0.993404	0	6	0.996711	0.993404	0.993404	0	6
1.54993	7.24573	0.609631	-0.502924	3.72036	1.28008	7.84493	1.69714	6.76945	1.31755	-0.676001	7.04128	4.81401	8.11986	0.996711	0.993404	0.993404	0	6	0.996711	0.993404	0.993404	0	6
1.24827	6.32088	0.337362	-0.29399	3.75984	1.2625	7.75313	1.3883	5.87131	0.794688	-0.463173	7.0739	4.75409	7.95707	0.996711	0.993404	0.993404	0	6	0.996711	0.993404	0.993404	0	6
1.80466	6.26747	1.35912	-0.296047	3.75567	1.28108	7.94931	1.93775	5.8275	1.58166	-0.460586	7.06273	4.73906	8.02326	0.996711	0.993404	0.993404	0	6	0.996711	0.993404	0.993404	0	6
1.78244	6.61473	1.60301	-0.48635	3.85327	1.24906	7.96339	1.91406	6.22231	1.67673	-0.651574	7.1508	4.66052	8.13205	0.996711	0.993404	0.993404	0	6	0.996711	0.993404	0.993404	0	6
1.83609	6.55299	2.44961	-0.184663	3.84552	1.2318	7.98102	1.96439	6.18562	2.35165	-0.346744	7.13326	4.60569	8.13132	0.996711	0.993404	0.993404	0	6	0.996711	0.993404	0.993404	0	6
1.54105	6.22331	1.7566	0.0288817	3.88629	1.22837	7.74328	1.66866	5.89956	1.52917	-0.131864	7.16246	4.55829	7.98408	0.996711	0.993404	0.993404	0	6	0.996711	0.993404	0.993404	0	6
1.8086	6.7691	2.21791	0.238887	3.93987	1.25797	7.70758	1.93186	6.44874	1.81587	0.0848574	7.20532	4.55995	7.83475	0.996711	0.993404	0.993404	0	6	0.996711	0.993404	0.993404	0	6
2.07494	6.41194	1.46624	0.250548	3.96268	1.32488	7.45947	2.19349	6.07656	0.900831	0.103377	7.21804	4.60819	7.40597	0.996711	0.993404	0.993404	0	6	0.996711	0.993404	0.993404	0	6
2.35389	6.22967	0.0823055	0.541674	4.05812	1.23776	7.54594	2.46712	5.85557	-0.634386	0.400973	7.30475	4.51435	7.2249	0.996711	0.993404	0.993404	0	6	0.996711	0.993404	0.993404	0	6
2.34868	4.79734	-1.09969	0.638464	4.00969	1.29161	7.2531	2.46434	4.44651	-1.8456	0.494485	7.2451	4.53979	7.01967	0.996711	0.993404	0.993404	0	6	0.996711	0.993404	0.993404	0	6
2.431	3.03733	-0.672364	0.724983	3.91796	1.22694	7.38544	2.55112	2.73766	-1.42372	0.576706	7.14002	4.43502	7.37247	0.996711	0.993404	0.993404	0	6	0.996711	0.993404	0.993404	0	6
2.0842	3.96595	-1.95552	0.899998	3.94659	1.11645	7.72748	2.21426	3.79101	-2.65405	0.744144	7.15032	4.25315	8.28072	0.996711	0.993404	0.993404	0	6	0.996711	0.993404	0.993404	0	6
2.05481	4.3192	-3.24677	1.13312	3.95409	1.15307	6.75979	2.20397	4.40418	-3.81114	0.965904	7.12986	4.15909	8.49135	0.996711	0.993404	0.993404	0	6	0.996711	0.993404	0.993404	0	6
1.93058	3.71425	-2.95453	1.04556	3.89869	1.12095	6.36705	2.07688	3.89873	-3.73538	0.90024	7.04908	4.04977	8.31801	0.996711	0.993404	0.993404	0	6	0.996711	0.993404	0.993404	0	6
1.81547	4.28221	-2.12401	1.24555	4.02131	1.1284	6.44842	1.95474	4.52224	-3.17446	1.12936	7.14675	3.99681	8.38435	0.996711	0.993404	0.993404	0	6	0.996711	0.993404	0.993404	0	6
1.72225	3.59123	-1.76338	1.27026	4.06436	1.14625	5.99725	1.85777	3.90764	-3.02478	1.18062	7.16307	3.94727	8.04217	0.996711	0.993404	0.993404	0	6	0.996711	0.993404	0.993404	0	6
1.70105	3.8569	-1.40297	1.16492	4.01288	1.07103	6.29727	1.82384	4.14996	-2.98015	1.11243	7.08876	3.84465	7.94807	0.996711	0.993404	0.993404	0	6	0.996711	0.993404	0.993404	0	6
1.84238	3.22993	-1.60135	1.26977	4.06212	1.00059	6.19493	1.96112	3.55594	-3.34097	1.24253	7.11343	3.72908	7.80286	0.996711	0.993404	0.993404	0	6	0.996711	0.993404	0.993404	0	6
2.05845	3.09661	-0.774284	1.26815	4.10128	0.992524	6.24722	2.17401	3.45723	-2.6485	1.26486	7.12777	3.67625	7.83631	0.996711	0.993404	0.993404	0	6	0.996711	0.993404	0.993404	0	6
2.0416	2.88165	-0.137235	1.37052	4.0987	0.997342	6.14327	2.15743	3.30958	-2.08775	1.3873	7.09857	3.62388	7.88943	0.996711	0.993404	0.993404	0	6	0.996711	0.993404	0.993404	0	6
2.09704	3.59995	1.01287	1.36643	4.19548	0.953862	5.97847	2.21325	4.10499	-1.01087	1.40422	7.16738	3.51814	7.91751	0.996711	0.993404	0.993404	0	6	0.996711	0.993404	0.993404	0	6
2.57144	4.28037	1.18442	1.6774	4.35458	1.06331	5.35652	2.68921	4.88596	-0.897826	1.73636	7.29632	3.55442	7.5887	0.996711	0.993404	0.993404	0	6	0.996711	0.993404	0.993404	0	6
1.8342	6.44897	0.952063	1.69062	4.14472	1.03517	4.64369	1.94714	7.10335	-1.27604	1.77941	7.05748	3.47142	6.87671	0.996711	0.993404	0.993404	0	6	0.996711	0.993404	0.993404	0	6
1.9454	5.91345	1.90525	1.83659	4.17062	1.06885	3.42912	2.04867	6.56009	-0.514774	1.95972	7.05703	3.47338	5.38694	0.996711	0.993404	0.993404	0	6	0.996711	0.993404	0.993404	0	6
1.69916	5.13382	3.36957	1.83813	4.16291	1.04818	3.51168	1.77717	5.58241	0.594369	2.00833	7.03361	3.50042	4.27869	0.996711	0.993404	0.993404	0	6	0.996711	0.993404	0.993404	0	6
1.59964	5.74073	4.10172	1.83049	4.14445	1.00418	3.71434	1.66442	6.03765	1.21859	2.02419	7.00214	3.49741	3.68947	0.996711	0.993404	0.993404	0	6	0.996711	0.993404	0.993404	0	6
1.78764	5.63488	3.22186	2.05354	4.31109	1.03816	3.28594	1.85155	5.86712	0.44685	2.24972	7.15519	3.54477	3.01018	0.996711	0.993404	0.993404	0	6	0.996711	0.993404	0.993404	0	6
1.89842	5.9193	2.31756	2.25914	4.27467	0.996334	3.25967	1.95534	6.01793	-0.408996	2.45998	7.11039	3.54554	2.40861	0.996711	0.993404	0.993404	0	6	0.996711	0.993404	0.993404	0	6
2.11467	5.98204	3.22975	2.15728	4.18794	0.986525	3.01965	2.16918	5.97042	0.647336	2.35134	7.01725	3.5737	1.77717	0.996711	0.993404	0.993404	0	6	0.996711	0.993404	0.993404	0	6
2.01531	6.23619	2.49288	2.07338	4.22508	0.993215	2.66541	2.07376	6.17151	0.155692	2.24904	7.04753	3.59817	1.35835	0.996711	0.993404	0.993404	0	6	0.996711	0.993404	0.993404	0	6
2.23611	6.68899	1.84253	2.07563	4.48199	1.03213	2.6197	2.2926	6.52011	-0.328222	2.23661	7.30126	3.67484	0.982522	0.996711	0.993404	0.993404	0	6	0.996711	0.993404	0.993404	0	6
2.02303	7.63954	2.73152	1.78315	4.2601	1.00936	2.36699	2.08036	7.38778	0.775414	1.92233	7.07723	3.68349	0.536614	0.996711	0.993404	0.993404	0	6	0.996711	0.993404	0.993404	0	6
1.98592	7.23904	3.18272	1.89953	4.38625	1.01801	2.04943	2.0434	6.89827	1.43429	2.01458	7.20308	3.72686	0.00498741	0.996711	0.993404	0.993404	0	6	0.996711	0.993404	0.993404	0	6
2.09076	7.71596	3.75433	1.8996	4.48496	1.05534	2.08849	2.14559	7.25453	2.17965	1.99037	7.30466	3.81271	0	0.996711	0.993404	0.993404	0	6	0.996711	0.993404	0.993404	0	6
2.25107	6.05491	4.63766	1.81948	4.43342	0.972751	1.76995	2.30906	5.52773	3.27946	1.88224	7.25516	3.75966	0	0.996711	0.993404	0.993404	0	6	0.996711	0.993404	0.993404	0	6
2.34778	6.15009	4.61894	1.60001	4.44924	0.91004	2.50203	2.40349	5.51147	3.34907	1.64664	7.27604	3.74538	0.269693	0.996711	0.993404	0.993404	0	6	0.996711	0.993404	0.993404	0	6
2.1096	5.64387	3.63841	1.50085	4.45204	0.957974	2.62083	2.17623	5.0182	2.65133	1.51241	7.27964	3.79474	0.616026	0.996711	0.993404	0.993404	0	6	0.996711	0.993404	0.993404	0	6
2.08861	6.32887	3.35826	1.5919	4.51362	0.922518	2.89978	2.16446	5.729	2.60868	1.57075	7.34057	3.75166	1.1532	0.996711	0.993404	0.993404	0	6	0.996711	0.993404	0.993404	0	6
2.03862	6.26509	2.50238	1.61219	4.66336	0.949233	2.50845	2.12643	5.74872	1.99893	1.55702	7.48565	3.74381	1.27502	0.996711	0.993404	0.993404	0	6	0.996711	0.993404	0.993404	0	6
2.25777	6.20405	2.64677	1.52003	4.73912	0.95691	2.51149	2.34676	5.69729	2.21083	1.44582	7.55818	3.74059	1.34964	0.996711	0.993404	0.993404	0	6	0.996711	0.993404	0.993404	0	6
2.08973	6.20552	2.07571	1.42402	4.58268	0.923842	2.61622	2.17882	5.70213	1.6837	1.33257	7.3982	3.69797	1.48891	0.996711	0.993404	0.993404	0	6	0.996711	0.993404	0.993404	0	6
2.14234	6.10835	2.51223	1.32378	4.63433	0.894357	2.69918	2.23255	5.62115	2.17012	1.21455	7.44516	3.65312	1.67071	0.996711	0.993404	0.993404	0	6	0.996711	0.993404	0.993404	0	6
1.93221	5.96351	2.76067	1.2273	4.71297	0.95012	2.75324	2.02445	5.50797	2.46866	1.10054	7.51754	3.68612	1.89273	0.996711	0.993404	0.993404	0	6	0.996711	0.993404	0.993404	0	6
1.87747	5.77176	2.86039	1.32346	4.64569	0.92769	2.88048	1.97046	5.34334	2.58645	1.18237	7.44315	3.64099	2.14708	0.996711	0.993404	0.993404	0	6	0.996711	0.993404	0.993404	0	6
1.82584	5.86645	2.82811	1.12901	5.0275	0.6308	2.84023	1.92197	5.49611	2.59064	0.972855	7.81531	3.30777	2.37883	0.996711	0.993404	0.993404	0	6	0.996711	0.993404	0.993404	0	6
1.8561	5.3837	3.29544	1.03199	4.87753	0.919802	2.79156	1.95236	5.05347	3.03517	0.866843	7.655	3.5651	2.48099	0.996711	0.993404	0.993404	0	6	0.996711	0.993404	0.993404	0	6
1.9501	5.63117	3.29942	1.12986	4.73116	0.923537	3.05433	2.04572	5.33711	2.99559	0.958589	7.49735	3.53756	2.86219	0.996711	0.993404	0.993404	0	6	0.996711	0.993404	0.993404	0	6
1.60494	6.32985	2.7986	1.14357	4.75394	0.962154	3.03158	1.70171	6.09273	2.46586	0.966184	7.50677	3.53577	3.05489	0.996711	0.993404	0.993404	0	6	0.996711	0.993404	0.993404	0	6
1.3495	6.6662	3.89275	1.05766	4.78923	0.900211	2.88652	1.44277	6.4443	3.45868	0.881536	7.52941	3.44845	2.89407	0.996711	0.993404	0.993404	0	6	0.996711	0.993404	0.993404	0	6
1.4426	6.19313	4.01381	0.973743	4.77877	0.931189	2.8083	1.52956	5.94764	3.4466	0.802365	7.5078	3.47027	2.61541	0.996711	0.993404	0.993404	0	6	0.996711	0.993404	0.993404	0	6
1.43146	5.45134	4.89058	0.67864	4.76733	0.879006	3.2088	1.50994	5.13881	4.17951	0.513079	7.4878	3.4288	2.63091	0.996711	0.993404	0.993404	0	6	0.996711	0.993404	0.993404	0	6
1.30397	6.01206	5.583	0.664893	4.84168	0.854521	3.98957	1.37683	5.63242	4.79227	0.499345	7.55491	3.41917	3.08363	0.996711	0.993404	0.993404	0	6	0.996711	0.993404	0.993404	0	6
1.67342	5.58396	5.41235	0.66898	4.80876	0.8578	3.9757	1.75118	5.22719	4.69707	0.490161	7.51144	3.40457	3.24227	0.996711	0.993404	0.993404	0	6	0.996711	0.993404	0.993404	0	6
1.54341	6.23354	6.15163	0.572331	4.79688	0.856251	4.18515	1.62424	5.89392	5.47413	0.383753	7.48855	3.38569	3.57182	0.996711	0.993404	0.993404	0	6	0.996711	0.993404	0.993404	0	6
1.34634	5.74038	5.93664	0.485304	4.76749	0.878824	4.13995	1.42928	5.41606	5.27475	0.289285	7.44763	3.3906	3.62219	0.996711	0.993404	0.993404	0	6	0.996711	0.993404	0.993404	0	6
1.38543	6.14585	6.16384	0.376237	4.81146	0.862464	4.56254	1.46548	5.78893	5.44697	0.179022	7.48197	3.37504	3.88732	0.996711	0.993404	0.993404	0	6	0.996711	0.993404	0.993404	0	6
1.39171	5.8274	6.15934	0.198294	4.90071	0.906325	4.49976	1.47594	5.50115	5.48705	-0.00822649	7.55893	3.39615	4.00976	0.996711	0.993404	0.993404	0	6	0.996711	0.993404	0.993404	0	6
1.25197	5.85864	6.8553	0.0876292	4.94456	0.939629	5.10294	1.33053	5.46996	6.08932	-0.116301	7.59434	3.44239	4.30396	0.996711	0.993404	0.993404	0	6	0.996711	0.993404	0.993404	0	6
1.47429	5.76166	6.68245	0.187794	4.79135	0.8445	5.28325	1.55628	5.38506	5.95881	-0.0250475	7.43011	3.33366	4.59494	0.996711	0.993404	0.993404	0	6	0.996711	0.993404	0.993404	0	6
1.61738	4.61748	6.38674	0.000552736	4.87803	0.915205	5.37485	1.70333	4.26716	5.70256	-0.220491	7.5046	3.38411	4.85352	0.996711	0.993404	0.993404	0	6	0.996711	0.993404	0.993404	0	6
1.5056	5.19394	5.74886	-0.0209784	4.89939	0.82223	6.22204	1.58998	4.82186	5.02155	-0.242823	7.51545	3.28871	5.60303	0.996711	0.993404	0.993404	0	6	0.996711	0.993404	0.993404	0	6
1.53082	4.69655	5.00614	0.388883	5.0188	0.870258	6.08535	1.62572	4.42431	4.39488	0.153596	7.61855	3.28683	5.99731	0.996711	0.993404	0.993404	0	6	0.996711	0.993404	0.993404	0	6
1.90243	5.66294	4.85433	0.190023	4.95399	0.835146	6.1148	2.00045	5.44726	4.22811	-0.046146	7.53732	3.21418	6.26865	0.996711	0.993404	0.993404	0	6	0.996711	0.993404	0.993404	0	6
1.68661	5.67923	4.45083	0.201288	4.91601	0.823136	5.85368	1.7869	5.52282	3.78415	-0.0321036	7.48156	3.16169	6.23532	0.996711	0.993404	0.993404	0	6	0.996711	0.993404	0.993404	0	6
1.58904	5.28043	3.91559	0.301307	4.82977	0.863236	5.80862	1.68632	5.13681	3.13011	0.0786824	7.37868	3.17833	6.15874	0.996711	0.993404	0.993404	0	6	0.996711	0.993404	0.993404	0	6
1.91174	5.10872	4.6479	0.30096	4.86705	0.814069	5.81512	2.00801	4.99056	3.77624	0.0874679	7.39854	3.1016	6.20889	0.996711	0.993404	0.993404	0	6	0.996711	0.993404	0.993404	0	6
1.76004	5.14168	4.64178	0.206607	4.85667	0.809716	5.80187	1.85673	5.06199	3.70395	0.00172233	7.36968	3.06462	6.30527	0.996711	0.993404	0.993404	0	6	0.996711	0.993404	0.993404	0	6
1.72252	4.1948	3.67303	0.106557	4.87794	0.81766	5.869	1.81773	4.13635	2.64313	-0.0864179	7.37272	3.04631	6.38601	0.996711	0.993404	0.993404	0	6	0.996711	0.993404	0.993404	0	6
1.93064	4.84434	3.41348	0.198816	4.89867	0.774558	6.25961	2.02582	4.81914	2.31503	0.0167782	7.37439	2.97255	6.85497	0.996711	0.993404	0.993404	0	6	0.996711	0.993404	0.993404	0	6
1.91992	5.35823	2.73296	0.203134	4.95618	0.802283	6.02844	2.01933	5.41371	1.62046	0.0287095	7.41	2.95031	6.93651	0.996711	0.993404	0.993404	0	6	0.996711	0.993404	0.993404	0	6
1.87239	4.85142	1.76229	0.216736	4.7507	0.795479	5.66333	1.97286	4.97142	0.58039	0.0561439	7.18201	2.89739	6.76611	0.996711	0.993404	0.993404	0	6	0.996711	0.993404	0.993404	0	6
1.51437	5.91896	3.68167	0.103722	4.87627	0.746397	5.84088	1.60963	6.04438	2.34597	-0.0347047	7.28707	2.82456	6.82094	0.996711	0.993404	0.993404	0	6	0.996711	0.993404	0.993404	0	6
1.68642	5.86679	3.15064	0.131553	4.86698	0.806935	5.15531	1.78479	6.07287	1.78401	0.00603949	7.25382	2.83298	6.41683	0.996711	0.993404	0.993404	0	6	0.996711	0.993404	0.993404	0	6
1.53004	6.49901	4.22542	0.229944	4.95771	0.815816	5.22179	1.61803	6.6567	2.64649	0.133499	7.32584	2.83916	6.08144	0.996711	0.993404	0.993404	0	6	0.996711	0.993404	0.993404	0	6
1.44042	5.8225	4.47941	0.246412	4.81073	0.82289	4.82593	1.52361	5.95898	2.79648	0.169885	7.16036	2.83712	5.48216	0.996711	0.993404	0.993404	0	6	0.996711	0.993404	0.993404	0	6
1.66574	5.03757	5.08841	-0.0575245	4.79683	0.775279	5.0861	1.73977	5.09109	3.26804	-0.11182	7.13204	2.80738	5.25782	0.996711	0.993404	0.993404	0	6	0.996711	0.993404	0.993404	0	6
1.55424	5.69892	5.50142	0.134211	4.75319	0.758683	5.58328	1.62621	5.71341	3.67299	0.090226	7.07399	2.7959	5.55865	0.996711	0.993404	0.993404	0	6	0.996711	0.993404	0.993404	0	6
1.22313	5.41128	4.76823	-0.260941	4.85044	0.768717	5.35532	1.29945	5.44701	3.0293	-0.303528	7.15498	2.78862	5.46247	0.996711	0.993404	0.993404	0	6	0.996711	0.993404	0.993404	0	6
1.634	5.52884	5.0835	-0.158797	4.85461	0.749983	5.47296	1.71238	5.57632	3.39763	-0.19725	7.14321	2.7548	5.64256	0.996711	0.993404	0.993404	0	6	0.996711	0.993404	0.993404	0	6
1.70541	6.31426	5.17867	-0.157381	4.72877	0.767968	5.47369	1.78548	6.37784	3.53864	-0.191362	7.00127	2.75516	5.71675	0.996711	0.993404	0.993404	0	6	0.996711	0.993404	0.993404	0	6
1.72648	5.82115	5.6984	0.0581359	4.81557	0.77546	5.15795	1.80815	5.90798	4.0999	0.0288534	7.07159	2.74131	5.49895	0.996711	0.993404	0.993404	0	6	0.996711	0.993404	0.993404	0	6
1.45921	5.50868	6.0275	0.0577426	4.93911	0.823078	5.25594	1.53593	5.55744	4.38333	0.0401684	7.18158	2.79114	5.37078	0.996711	0.993404	0.993404	0	6	0.996711	0.993404	0.993404	0	6
1.56175	6.41121	6.91101	-0.0423943	4.88401	0.782444	5.3258	1.63694	6.444	5.28242	-0.0541146	7.11297	2.74604	5.35601	0.996711	0.993404	0.993404	0	6	0.996711	0.993404	0.993404	0	6
1.37573	5.83679	6.44351	-0.130839	4.86915	0.756097	5.0055	1.45139	5.87225	4.86289	-0.140005	7.0843	2.70844	5.0544	0.996711	0.993404	0.993404	0	6	0.996711	0.993404	0.993404	0	6
1.25539	5.39596	7.28632	-0.127042	4.86838	0.750054	5.19082	1.32745	5.39463	5.70124	-0.129889	7.07192	2.70659	5.05414	0.996711	0.993404	0.993404	0	6	0.996711	0.993404	0.993404	0	6
1.6198	4.82382	6.40745	-0.229731	4.96035	0.765259	5.50149	1.68944	4.78816	4.84611	-0.229584	7.1532	2.72667	5.21422	0.996711	0.993404	0.993404	0	6	0.996711	0.993404	0.993404	0	6
1.53947	4.59494	6.40284	-0.439588	4.85285	0.704934	5.90907	1.61043	4.55846	4.92222	-0.442105	7.03425	2.65901	5.65728	0.996711	0.993404	0.993404	0	6	0.996711	0.993404	0.993404	0	6
1.52296	5.15076	6.0808	-0.341018	4.93263	0.689161	6.11989	1.60059	5.17745	4.74382	-0.351805	7.09953	2.60958	6.21779	0.996711	0.993404	0.993404	0	6	0.996711	0.993404	0.993404	0	6
1.73882	5.71793	6.95301	-0.432036	4.84599	0.704824	5.90105	1.82201	5.8235	5.71963	-0.447315	6.99637	2.58158	6.37783	0.996711	0.993404	0.993404	0	6	0.996711	0.993404	0.993404	0	6
1.48401	5.94413	7.37666	-0.522139	4.90904	0.701019	5.71326	1.56689	6.09183	6.14649	-0.532829	7.04326	2.54507	6.3323	0.996711	0.993404	0.993404	0	6	0.996711	0.993404	0.993404	0	6
1.58222	5.77662	7.56443	-0.416367	4.86127	0.69058	5.63603	1.66067	5.9291	6.27767	-0.417065	6.98059	2.51565	6.19223	0.996711	0.993404	0.993404	0	6	0.996711	0.993404	0.993404	0	6
1.73362	5.82936	8.58008	-0.614945	4.78402	0.702683	5.65654	1.80713	5.97332	7.2377	-0.605715	6.88934	2.51492	6.09466	0.996711	0.993404	0.993404	0	6	0.996711	0.993404	0.993404	0	6
1.56473	5.82593	8.59854	-0.71312	4.94887	0.681011	5.72431	1.63514	5.9707	7.23478	-0.696998	7.04018	2.47793	6.11001	0.996711	0.993404	0.993404	0	6	0.996711	0.993404	0.993404	0	6
1.57566	5.87017	8.23247	-0.611053	4.98202	0.734328	5.74439	1.64402	6.02227	6.86612	-0.589777	7.05926	2.51385	6.11935	0.996711	0.993404	0.993404	0	6	0.996711	0.993404	0.993404	0	6
1.66258	5.17128	8.59954	-0.703516	4.98036	0.721567	5.67132	1.72944	5.33542	7.23987	-0.678001	7.0434	2.48187	6.0619	0.996711	0.993404	0.993404	0	6	0.996711	0.993404	0.993404	0	6
1.64199	5.42109	7.58525	-0.713027	4.95876	0.663267	6.02795	1.70522	5.57527	6.20581	-0.681272	7.00869	2.41296	6.322	0.996711	0.993404	0.993404	0	6	0.996711	0.993404	0.993404	0	6
1.66002	5.50237	6.89701	-0.607004	4.92216	0.654449	5.9228	1.72607	5.70886	5.58732	-0.576652	6.95631	2.36947	6.44878	0.996711	0.993404	0.993404	0	6	0.996711	0.993404	0.993404	0	6
1.65883	6.08756	7.23595	-1.00205	5.24653	0.718993	5.83144	1.72435	6.32688	5.93834	-0.967977	7.26498	2.40474	6.46034	0.996711	0.993404	0.993404	0	6	0.996711	0.993404	0.993404	0	6
1.74521	6.95557	7.24475	-0.89711	4.94319	0.678049	5.71509	1.8085	7.21531	5.93271	-0.856898	6.94613	2.3385	6.37254	0.996711	0.993404	0.993404	0	6	0.996711	0.993404	0.993404	0	6
1.68652	6.84535	5.91734	-0.785254	5.01683	0.696847	5.40976	1.74507	7.09857	4.55969	-0.736294	7.00547	2.34257	5.95871	0.996711	0.993404	0.993404	0	6	0.996711	0.993404	0.993404	0	6
1.64746	6.13043	4.77735	-0.786532	4.96991	0.692605	5.43022	1.69685	6.32037	3.32856	-0.72554	6.94754	2.34747	5.60136	0.996711	0.993404	0.993404	0	6	0.996711	0.993404	0.993404	0	6
2.09364	6.07651	5.92202	-0.79164	4.95118	0.700208	5.70744	2.13761	6.21646	4.45744	-0.726043	6.91877	2.36256	5.62015	0.996711	0.993404	0.993404	0	6	0.996711	0.993404	0.993404	0	6
2.6564	6.54325	4.82936	-0.692072	4.93146	0.678496	5.78667	2.70074	6.67992	3.43972	-0.630506	6.88788	2.3319	5.71011	0.996711	0.993404	0.993404	0	6	0.996711	0.993404	0.993404	0	6
2.5521	6.49394	4.85374	-0.796518	4.85692	0.681133	5.59294	2.59815	6.64643	3.55324	-0.740802	6.80138	2.31746	5.61915	0.996711	0.993404	0.993404	0	6	0.996711	0.993404	0.993404	0	6
2.61136	6.34189	3.8648	-0.892169	4.92248	0.712018	5.3208	2.6615	6.54613	2.67427	-0.844266	6.85292	2.31554	5.61486	0.996711	0.993404	0.993404	0	6	0.996711	0.993404	0.993404	0	6
2.59287	6.74225	3.95472	-0.890891	5.04944	0.784342	5.23587	2.6442	6.98746	2.81726	-0.84584	6.96538	2.35651	5.70601	0.996711	0.993404	0.993404	0	6	0.996711	0.993404	0.993404	0	6
2.63739	6.78549	3.81674	-0.980088	4.95941	0.729315	4.94938	2.68928	7.07635	2.71178	-0.935843	6.85987	2.26645	5.59654	0.996711	0.993404	0.993404	0	6	0.996711	0.993404	0.993404	0	6
2.10401	6.63343	4.1782	-0.872138	5.0003	0.741189	4.9332	2.1516	6.92814	3.03295	-0.822311	6.88657	2.25834	5.52481	0.996711	0.993404	0.993404	0	6	0.996711	0.993404	0.993404	0	6
2.28395	6.68256	4.26822	-1.06872	5.08496	0.667545	4.98066	2.32572	6.95778	3.06898	-1.01229	6.95835	2.17473	5.40963	0.996711	0.993404	0.993404	0	6	0.996711	0.993404	0.993404	0	6
2.128	7.10943	4.25153	-0.970924	5.05737	0.668621	5.08585	2.16533	7.36652	3.02843	-0.910806	6.91841	2.16695	5.3836	0.996711	0.993404	0.993404	0	6	0.996711	0.993404	0.993404	0	6
2.08182	6.65617	4.19826	-1.05915	5.06769	0.651111	4.81868	2.11825	6.92355	3.00568	-1.0003	6.91549	2.13043	5.14763	0.996711	0.993404	0.993404	0	6	0.996711	0.993404	0.993404	0	6
2.21581	6.55357	4.74766	-0.961269	5.08399	0.620069	5.01123	2.24722	6.7896	3.5311	-0.899513	6.92055	2.09664	5.15718	0.996711	0.993404	0.993404	0	6	0.996711	0.993404	0.993404	0	6
2.03084	6.653	5.69638	-0.951142	5.07464	0.666458	5.02616	2.06118	6.88752	4.51822	-0.892324	6.89923	2.13003	5.16493	0.996711	0.993404	0.993404	0	6	0.996711	0.993404	0.993404	0	6
2.1717	6.78888	4.0223	-1.04899	5.08791	0.698701	5.14361	2.19791	6.98985	2.84298	-0.990381	6.90226	2.162	5.11363	0.996711	0.993404	0.993404	0	6	0.996711	0.993404	0.993404	0	6
2.3005	6.93008	3.76691	-1.04402	5.09698	0.735185	5.24179	2.32449	7.10757	2.62091	-0.989319	6.90135	2.19568	5.11572	0.996711	0.993404	0.993404	0	6	0.996711	0.993404	0.993404	0	6
2.36289	6.74419	4.33984	-1.14394	5.01151	0.813949	5.32466	2.38467	6.89383	3.23148	-1.09432	6.80662	2.27411	5.09152	0.996711	0.993404	0.993404	0	6	0.996711	0.993404	0.993404	0	6
1.97104	7.03125	4.8769	-1.13475	5.00078	1.02744	5.4648	1.99291	7.17276	3.83951	-1.09378	6.78621	2.48017	5.23617	0.996711	0.993404	0.993404	0	6	0.996711	0.993404	0.993404	0	6
1.74528	7.75147	5.35736	-1.23387	4.83684	1.84318	5.52816	1.76602	7.8747	4.37131	-1.20054	6.6132	3.29224	5.24936	0.996711	0.993404	0.993404	0	6	0.996711	0.993404	0.993404	0	6
1.64812	7.60037	4.76651	-1.21744	5.02909	0.971873	5.36891	1.67072	7.73612	3.86927	-1.19542	6.79513	2.4052	5.19988	0.996711	0.993404	0.993404	0	6	0.996711	0.993404	0.993404	0	6
1.86064	8.41898	4.39926	-1.1039	5.0083	0.906103	5.32574	1.87979	8.51989	3.51216	-1.08702	6.76602	2.3414	5.01016	0.996711	0.993404	0.993404	0	6	0.996711	0.993404	0.993404	0	6
2.32452	8.90165	4.53148	-1.1922	4.98738	0.798862	5.18099	2.33701	8.92379	3.62079	-1.17857	6.73965	2.2551	4.51527	0.996711	0.993404	0.993404	0	6	0.996711	0.993404	0.993404	0	6
2.14976	7.51581	4.9271	-1.38238	4.97057	1.03203	5.14562	2.15497	7.42968	4.00502	-1.37457	6.72043	2.52433	4.02544	0.996711	0.993404	0.993404	0	6	0.996711	0.993404	0.993404	0	6
2.60202	7.68191	4.57214	-1.19577	4.97748	0.698913	5.92516	2.60101	7.47122	3.67752	-1.19909	6.72785	2.23802	4.32444	0.996711	0.993404	0.993404	0	6	0.996711	0.993404	0.993404	0	6
2.43746	7.74132	4.77648	-1.18622	4.93964	0.82519	5.98808	2.44181	7.50364	4.08013	-1.21693	6.68789	2.37623	4.45636	0.996711	0.993404	0.993404	0	6	0.996711	0.993404	0.993404	0	6
2.30159	7.62114	4.03061	-1.18852	4.96251	0.771273	6.17661	2.30784	7.33309	3.47276	-1.24293	6.70992	2.34234	4.57619	0.996711	0.993404	0.993404	0	6	0.996711	0.993404	0.993404	0	6
2.52363	7.42344	3.31647	-1.08798	4.96261	0.689462	6.22495	2.53497	7.12095	2.93089	-1.17003	6.70794	2.26636	4.73775	0.996711	0.993404	0.993404	0	6	0.996711	0.993404	0.993404	0	6
2.54341	7.85435	4.14823	-1.28434	4.93814	0.697021	6.23515	2.56022	7.55531	3.92073	-1.39343	6.68023	2.27108	4.92804	0.996711	0.993404	0.993404	0	6	0.996711	0.993404	0.993404	0	6
2.56241	7.53709	2.46018	-1.27964	4.89616	0.702913	6.182	2.58325	7.242	2.34938	-1.41249	6.63436	2.27194	5.02683	0.996711	0.993404	0.993404	0	6	0.996711	0.993404	0.993404	0	6
2.79558	7.18261	2.04001	-1.28063	4.92316	0.805134	6.31881	2.81888	6.88637	2.00622	-1.43387	6.65712	2.36963	5.26514	0.996711	0.993404	0.993404	0	6	0.996711	0.993404	0.993404	0	6
2.90236	6.24182	1.1063	-1.28656	4.94304	0.993706	6.50204	2.92959	5.96677	1.15284	-1.46018	6.67114	2.5438	5.64639	0.996711	0.993404	0.993404	0	6	0.996711	0.993404	0.993404	0	6
2.75997	6.90529	0.718481	-1.00726	4.94688	0.840914	6.84293	2.79399	6.69441	0.860454	-1.2017	6.666	2.35761	6.37429	0.996711	0.993404	0.993404	0	6	0.996711	0.993404	0.993404	0	6
2.96443	5.78744	-0.255693	-0.996357	4.97624	0.844458	6.11338	3.01307	5.7487	0.0479618	-1.21527	6.67908	2.28093	6.52551	0.996711	0.993404	0.993404	0	6	0.996711	0.993404	0.993404	0	6
2.92924	4.65974	-0.82104	-0.899586	5.0045	0.649184	6.14114	2.98204	4.7359	-0.552212	-1.12356	6.68991	2.02022	7.03053	0.996711	0.993404	0.993404	0	6	0.996711	0.993404	0.993404	0	6
2.75591	5.21181	-1.55998	-0.819007	4.98465	0.629593	6.35151	2.81237	5.41856	-1.36338	-1.0419	6.64921	1.92514	7.7434	0.996711	0.993404	0.993404	0	6	0.996711	0.993404	0.993404	0	6
2.67486	5.31735	-2.33098	-0.914247	4.96837	0.878641	5.71636	2.74145	5.74515	-2.15462	-1.13667	6.60469	2.05856	8.01296	0.996711	0.993404	0.993404	0	6	0.996711	0.993404	0.993404	0	6
2.58041	4.9208	-3.07437	-0.704833	5.04702	0.667311	5.28383	2.64927	5.53252	-3.07156	-0.90935	6.65238	1.7388	8.19199	0.996711	0.993404	0.993404	0	6	0.996711	0.993404	0.993404	0	6
2.93006	4.77558	-3.48642	-0.601023	5.0626	0.8189	5.06874	2.99386	5.51482	-3.77813	-0.773169	6.63629	1.80009	8.2426	0.996711	0.993404	0.993404	0	6	0.996711	0.993404	0.993404	0	6
3.03048	4.78022	-3.32768	-0.298262	5.07052	0.693612	4.96687	3.08729	5.62341	-3.93869	-0.432183	6.6116	1.59298	8.27532	0.996711	0.993404	0.993404	0	6	0.996711	0.993404	0.993404	0	6
3.46772	2.16419	-3.94823	-0.204812	5.00324	0.966628	4.69978	3.51703	3.09548	-4.87462	-0.297533	6.51101	1.79075	8.06803	0.996711	0.993404	0.993404	0	6	0.996711	0.993404	0.993404	0	6
3.67513	5.12665	-3.64128	0.0611106	5.10053	0.688269	5.30416	3.72102	6.1768	-4.81517	0.00693713	6.57238	1.4256	8.90144	0.996711	0.993404	0.993404	0	6	0.996711	0.993404	0.993404	0	6
3.06441	4.09909	-4.62197	0.306371	5.19566	0.840244	3.57679	3.12154	5.42708	-5.85341	0.278586	6.6219	1.42596	8.19542	0.996711	0.993404	0.993404	0	6	0.996711	0.993404	0.993404	0	6
3.0167	3.17771	-4.30139	0.506574	5.16295	0.903142	3.4059	3.05736	4.54329	-5.98901	0.542603	6.55081	1.42463	7.71588	0.996711	0.993404	0.993404	0	6	0.996711	0.993404	0.993404	0	6
2.83988	3.12064	-3.02949	0.505568	5.21047	0.77891	3.45328	2.86809	4.52694	-5.07374	0.599157	6.56028	1.23941	7.53713	0.996711	0.993404	0.993404	0	6	0.996711	0.993404	0.993404	0	6
3.04725	3.45391	-2.50161	0.5125	5.28028	0.738502	3.34935	3.06652	4.91047	-4.81696	0.658046	6.59201	1.13743	7.30604	0.996711	0.993404	0.993404	0	6	0.996711	0.993404	0.993404	0	6
2.72429	3.81932	-1.50942	0.519869	5.31478	0.681322	3.21158	2.73353	5.29735	-4.07731	0.716871	6.59012	1.03219	6.92927	0.996711	0.993404	0.993404	0	6	0.996711	0.993404	0.993404	0	6
2.94885	4.55672	-0.90728	0.730632	5.34998	0.677372	2.99634	2.94759	6.02943	-3.69479	0.976637	6.59117	0.99375	6.38541	0.996711	0.993404	0.993404	0	6	0.996711	0.993404	0.993404	0	6
3.03007	3.49057	-0.0235682	0.645939	5.39954	0.958581	2.61729	3.01698	4.91892	-3.00461	0.938246	6.60997	1.25957	5.535	0.996711	0.993404	0.993404	0	6	0.996711	0.993404	0.993404	0	6
3.1209	3.87375	1.70118	0.634502	5.40907	0.789403	3.08489	3.09373	5.20262	-1.45143	0.969744	6.59375	1.10169	5.32254	0.996711	0.993404	0.993404	0	6	0.996711	0.993404	0.993404	0	6
3.41775	4.56162	1.98476	0.642128	5.44989	0.733465	2.92898	3.3879	5.8717	-1.13469	1.00103	6.60805	1.03102	4.98719	0.996711	0.993404	0.993404	0	6	0.996711	0.993404	0.993404	0	6
3.46087	4.26918	2.01276	0.55485	5.50939	0.63095	2.64176	3.42675	5.54151	-1.07195	0.935355	6.64339	0.922402	4.44536	0.996711	0.993404	0.993404	0	6	0.996711	0.993404	0.993404	0	6
3.79339	5.56474	2.58815	0.554738	5.50305	0.626116	2.76083	3.75188	6.75865	-0.476518	0.955688	6.6167	0.929471	4.13396	0.996711	0.993404	0.993404	0	6	0.996711	0.993404	0.993404	0	6
3.81278	3.17774	2.55749	0.572554	5.52852	0.730425	2.30233	3.76805	4.31947	-0.399818	0.983855	6.62301	1.03852	3.42884	0.996711	0.993404	0.993404	0	6	0.996711	0.993404	0.993404	0	6
3.44297	4.3864	4.07792	0.734684	5.50121	0.691314	3.19679	3.38965	5.41398	1.17853	1.15746	6.58152	1.03037	3.7878	0.996711	0.993404	0.993404	0	6	0.996711	0.993404	0.993404	0	6
3.64556	5.29557	3.27073	0.861783	5.6415	0.866739	2.34439	3.60566	6.42152	0.743557	1.267	6.69995	1.1557	3.53474	0.996711	0.993404	0.993404	0	6	0.996711	0.993404	0.993404	0	6
3.36382	5.10262	3.03092	0.681141	5.64447	0.713911	1.83707	3.32058	6.20348	0.618083	1.08898	6.68562	0.9951	2.91022	0.996711	0.993404	0.993404	0	6	0.996711	0.993404	0.993404	0	6
3.36525	4.51189	3.40163	0.782518	5.66442	0.728242	1.91901	3.31192	5.51504	1.02415	1.1972	6.69298	1.03109	2.51682	0.996711	0.993404	0.993404	0	6	0.996711	0.993404	0.993404	0	6
3.13992	5.13709	2.42219	0.779484	5.72657	0.702641	2.11056	3.08093	6.06499	0.166184	1.19085	6.74394	1.02199	2.40286	0.996711	0.993404	0.993404	0	6	0.996711	0.993404	0.993404	0	6
2.97368	4.42053	1.19319	0.891327	5.74562	0.845347	1.85117	2.91395	5.31482	-0.864206	1.29015	6.75159	1.16649	2.07925	0.996711	0.993404	0.993404	0	6	0.996711	0.993404	0.993404	0	6
3.02906	4.88266	0.878306	0.987323	5.7688	0.78658	2.08347	2.96481	5.70916	-1.03163	1.37534	6.76598	1.12275	2.07229	0.996711	0.993404	0.993404	0	6	0.996711	0.993404	0.993404	0	6
2.66495	5.03447	0.0273634	1.19626	5.71423	0.769723	1.86605	2.60113	5.839	-1.6649	1.56504	6.70185	1.10392	1.86872	0.996711	0.993404	0.993404	0	6	0.996711	0.993404	0.993404	0	6
2.14469	4.95585	0.693806	1.09995	5.69215	0.726174	1.64488	2.07833	5.71697	-0.829441	1.45139	6.67173	1.06581	1.5406	0.996711	0.993404	0.993404	0	6	0.996711	0.993404	0.993404	0	6
2.57071	5.92878	0.479944	1.00872	5.6472	0.724938	1.4927	2.50237	6.65264	-0.870171	1.34032	6.61929	1.06772	1.31741	0.996711	0.993404	0.993404	0	6	0.996711	0.993404	0.993404	0	6
2.83482	6.04272	0.836735	1.02008	5.62117	0.718191	1.21839	2.76258	6.7104	-0.370786	1.33231	6.58737	1.07155	0.877184	0.996711	0.993404	0.993404	0	6	0.996711	0.993404	0.993404	0	6
2.40347	5.61039	1.26756	0.925268	5.63069	0.748862	1.15981	2.32514	6.19287	0.175222	1.21815	6.59344	1.12529	0.519971	0.996711	0.993404	0.993404	0	6	0.996711	0.993404	0.993404	0	6
2.32765	5.95321	1.5943	0.722887	5.63819	0.765555	1.33071	2.24502	6.45475	0.64807	0.991357	6.59881	1.16553	0.445306	0.996711	0.993404	0.993404	0	6	0.996711	0.993404	0.993404	0	6
2.33727	5.5959	1.99891	0.626747	5.63449	0.868602	1.29405	2.25505	6.05686	1.26144	0.8633	6.59223	1.27753	0.390193	0.996711	0.993404	0.993404	0	6	0.996711	0.993404	0.993404	0	6
2.29105	6.11181	1.73612	0.624925	5.6483	0.719778	1.47727	2.20924	6.53804	1.19357	0.828917	6.60322	1.13468	0.576851	0.996711	0.993404	0.993404	0	6	0.996711	0.993404	0.993404	0	6
2.28615	6.46642	1.94087	0.534938	5.6307	0.648401	1.2758	2.20722	6.8901	1.60888	0.703662	6.58134	1.05564	0.53184	0.996711	0.993404	0.993404	0	6	0.996711	0.993404	0.993404	0	6
2.25387	6.31396	1.63103	0.74138	5.60172	0.710452	1.16736	2.17377	6.70649	1.43273	0.880257	6.54894	1.11939	0.406816	0.996711	0.993404	0.993404	0	6	0.996711	0.993404	0.993404	0	6
1.93293	6.15716	2.78926	0.546006	5.62075	0.795078	1.12646	1.85082	6.51006	2.70157	0.655923	6.565	1.20889	0.30324	0.996711	0.993404	0.993404	0	6	0.996711	0.993404	0.993404	0	6
2.09585	7.05778	3.6319	0.545351	5.59156	0.728866	1.2527	2.01217	7.37217	3.65112	0.62564	6.53298	1.14743	0.376223	0.996711	0.993404	0.993404	0	6	0.996711	0.993404	0.993404	0	6
2.15732	6.08296	2.47755	0.560331	5.66991	0.767013	0.914004	2.07478	6.3851	2.62837	0.608179	6.60728	1.18007	0.119551	0.996711	0.993404	0.993404	0	6	0.996711	0.993404	0.993404	0	6
2.12075	6.21757	2.87342	0.458972	5.64951	0.651268	1.29255	2.03398	6.45565	3.06887	0.481046	6.58496	1.0786	0.303474	0.996711	0.993404	0.993404	0	6	0.996711	0.993404	0.993404	0	6
2.33081	5.34898	3.10804	0.362227	5.6492	0.653271	1.46502	2.24416	5.55543	3.40423	0.353049	6.58171	1.08372	0.468335	0.996711	0.993404	0.993404	0	6	0.996711	0.993404	0.993404	0	6
2.13908	6.27087	2.7216	0.354274	5.66337	0.688666	2.00235	2.05319	6.45234	3.11423	0.313765	6.59248	1.11955	1.02895	0.996711	0.993404	0.993404	0	6	0.996711	0.993404	0.993404	0	6
2.16126	6.75053	3.4184	0.468278	5.669	0.675551	1.81453	2.08155	6.96639	3.96145	0.39194	6.59142	1.0828	1.15796	0.996711	0.993404	0.993404	0	6	0.996711	0.993404	0.993404	0	6
1.83394	6.55081	2.73082	0.381599	5.68919	0.801307	1.66831	1.75351	6.74792	3.3032	0.280065	6.60601	1.20317	1.01548	0.996711	0.993404	0.993404	0	6	0.996711	0.993404	0.993404	0	6
1.90414	6.92239	3.56054	0.384661	5.70234	0.754271	1.90689	1.81923	7.05667	4.10467	0.262852	6.61542	1.16869	1.03508	0.996711	0.993404	0.993404	0	6	0.996711	0.993404	0.993404	0	6
1.87212	5.98664	3.74323	0.290761	5.63378	0.721356	1.93933	1.78544	6.06842	4.2995	0.145084	6.54319	1.14669	0.930558	0.996711	0.993404	0.993404	0	6	0.996711	0.993404	0.993404	0	6
1.45861	6.34158	3.92418	0.385229	5.6324	0.683992	2.43997	1.37077	6.36575	4.49961	0.214889	6.53869	1.12389	1.28579	0.996711	0.993404	0.993404	0	6	0.996711	0.993404	0.993404	0	6
1.55494	6.07352	4.23593	0.193579	5.60967	0.716219	2.41116	1.47174	6.09144	4.90376	-0.00758723	6.51066	1.15175	1.38859	0.996711	0.993404	0.993404	0	6	0.996711	0.993404	0.993404	0	6
1.83842	6.8746	3.97993	0.192162	5.59496	0.713624	2.72154	1.75708	6.86511	4.68505	-0.0348429	6.49097	1.1522	1.70351	0.996711	0.993404	0.993404	0	6	0.996711	0.993404	0.993404	0	6
2.00042	5.81827	3.16964	0.106412	5.61789	0.700956	2.58593	1.92365	5.80919	3.93649	-0.147999	6.50726	1.13173	1.711	0.996711	0.993404	0.993404	0	6	0.996711	0.993404	0.993404	0	6
1.92374	7.11698	4.63986	-0.00843255	5.5793	0.636763	3.20144	1.84607	7.05766	5.38055	-0.282287	6.46375	1.07904	2.1936	0.996711	0.993404	0.993404	0	6	0.996711	0.993404	0.993404	0	6
1.65939	7.35137	3.29451	0.0144734	5.53912	0.710656	2.80178	1.59077	7.33625	4.13588	-0.288747	6.41416	1.12841	2.15583	0.996711	0.993404	0.993404	0	6	0.996711	0.993404	0.993404	0	6
1.92511	6.90984	3.42991	-0.079673	5.55665	0.743154	2.85647	1.85427	6.84134	4.19697	-0.396473	6.42546	1.17242	2.03039	0.996711	0.993404	0.993404	0	6	0.996711	0.993404	0.993404	0	6
1.68221	6.72915	1.52228	0.0106356	5.58276	0.68429	3.28329	1.60885	6.5865	2.21793	-0.3196	6.44683	1.13589	2.19829	0.996711	0.993404	0.993404	0	6	0.996711	0.993404	0.993404	0	6
1.72141	6.52832	1.82241	0.0117192	5.58466	0.622018	3.40898	1.65273	6.36802	2.54946	-0.340227	6.44201	1.07647	2.38533	0.996711	0.993404	0.993404	0	6	0.996711	0.993404	0.993404	0	6
1.89083	6.08305	2.6281	0.0158524	5.59476	0.705949	3.60366	1.82634	5.90357	3.36927	-0.355621	6.44509	1.16376	2.62376	0.996711	0.993404	0.993404	0	6	0.996711	0.993404	0.993404	0	6
1.92564	5.72291	2.59286	-0.087389	5.5362	0.78059	3.97181	1.86518	5.52408	3.33661	-0.476607	6.37921	1.24196	3.02781	0.996711	0.993404	0.993404	0	6	0.996711	0.993404	0.993404	0	6
1.71101	6.96827	2.31711	-0.291376	5.51736	0.605814	4.33355	1.65775	6.78509	3.09544	-0.699979	6.35099	1.05698	3.59659	0.996711	0.993404	0.993404	0	6	0.996711	0.993404	0.993404	0	6
1.70945	6.49881	1.46283	-0.175607	5.54729	0.674734	4.03435	1.66543	6.36546	2.28178	-0.60252	6.36881	1.10062	3.64872	0.996711	0.993404	0.993404	0	6	0.996711	0.993404	0.993404	0	6
1.54346	6.40043	1.86843	-0.281073	5.53428	0.564429	4.30738	1.49918	6.23596	2.58037	-0.712233	6.34613	0.994811	3.81826	0.996711	0.993404	0.993404	0	6	0.996711	0.993404	0.993404	0	6
1.60222	6.0639	2.10921	-0.27938	5.55102	0.639489	4.45377	1.56166	5.89817	2.77044	-0.718232	6.35188	1.06438	4.02917	0.996711	0.993404	0.993404	0	6	0.996711	0.993404	0.993404	0	6
1.62576	6.577	1.9239	-0.380879	5.53416	0.657717	4.75676	1.58816	6.40218	2.51901	-0.82473	6.32397	1.08048	4.35062	0.996711	0.993404	0.993404	0	6	0.996711	0.993404	0.993404	0	6
1.62454	5.87407	1.90452	-0.375876	5.56187	0.58022	4.75392	1.59239	5.7144	2.46333	-0.825783	6.3392	0.991845	4.48835	0.996711	0.993404	0.993404	0	6	0.996711	0.993404	0.993404	0	6
1.76536	5.55064	2.19759	-0.273669	5.54849	0.568575	5.03958	1.73718	5.39626	2.69132	-0.725625	6.31313	0.972491	4.84789	0.996711	0.993404	0.993404	0	6	0.996711	0.993404	0.993404	0	6
1.85187	5.55466	2.41669	-0.279213	5.52383	0.601904	5.33063	1.82794	5.41002	2.84516	-0.731637	6.27514	0.996502	5.22802	0.996711	0.993404	0.993404	0	6	0.996711	0.993404	0.993404	0	6
1.79285	5.29788	4.16211	-0.477222	5.51642	0.574485	5.37311	1.77678	5.20387	4.5662	-0.931759	6.25188	0.943393	5.55681	0.996711	0.993404	0.993404	0	6	0.996711	0.993404	0.993404	0	6
1.81683	5.05312	2.87383	-0.579315	5.49952	0.585951	5.54489	1.80709	5.00944	3.21697	-1.03074	6.21786	0.92738	5.97788	0.996711	0.993404	0.993404	0	6	0.996711	0.993404	0.993404	0	6
1.7509	5.02154	1.79298	-0.478204	5.49383	0.570841	5.72079	1.74812	5.04693	2.07019	-0.923764	6.19295	0.875821	6.46892	0.996711	0.993404	0.993404	0	6	0.996711	0.993404	0.993404	0	6
1.52059	5.64544	2.22856	-0.571119	5.52802	0.620049	5.69756	1.52487	5.75658	2.42514	-1.00693	6.20559	0.879852	6.80858	0.996711	0.993404	0.993404	0	6	0.996711	0.993404	0.993404	0	6
1.51517	5.07672	1.49476	-0.35706	5.5106	0.601834	5.47352	1.5235	5.25914	1.55566	-0.77569	6.16564	0.819835	6.83309	0.996711	0.993404	0.993404	0	6	0.996711	0.993404	0.993404	0	6
1.72756	5.07963	2.56171	-0.453648	5.46656	0.657805	5.58655	1.7348	5.28667	2.41512	-0.846549	6.10017	0.851498	6.93481	0.996711	0.993404	0.993404	0	6	0.996711	0.993404	0.993404	0	6
1.62957	5.14582	2.59994	-0.549724	5.49128	0.601639	5.67337	1.63752	5.38714	2.28122	-0.917759	6.10282	0.768494	7.07038	0.996711	0.993404	0.993404	0	6	0.996711	0.993404	0.993404	0	6
1.76989	4.87812	2.9264	-0.443491	5.48617	0.62057	5.67711	1.77946	5.15994	2.45558	-0.786332	6.07502	0.758704	7.15617	0.996711	0.993404	0.993404	0	6	0.996711	0.993404	0.993404	0	6
1.50117	4.81557	3.09284	-0.541917	5.49305	0.575249	5.7328	1.51186	5.13236	2.47001	-0.857692	6.05912	0.687061	7.26266	0.996711	0.993404	0.993404	0	6	0.996711	0.993404	0.993404	0	6
1.68213	4.70447	2.73441	-0.339892	5.47796	0.487032	5.77423	1.6942	5.05772	1.97212	-0.627948	6.02098	0.572349	7.36276	0.996711	0.993404	0.993404	0	6	0.996711	0.993404	0.993404	0	6
1.88077	4.23026	2.70588	-0.234699	5.49123	0.481562	5.72534	1.89414	4.61917	1.8119	-0.494118	6.0111	0.540963	7.36714	0.996711	0.993404	0.993404	0	6	0.996711	0.993404	0.993404	0	6
2.12976	4.78041	2.66612	-0.340299	5.38079	0.556339	5.87371	2.14292	5.18914	1.63068	-0.568911	5.87821	0.596408	7.48765	0.996711	0.993404	0.993404	0	6	0.996711	0.993404	0.993404	0	6
2.01521	4.84939	3.2077	-0.227427	5.32225	0.715305	5.59724	2.0336	5.33168	2.1143	-0.430914	5.79481	0.715446	7.46391	0.996711	0.993404	0.993404	0	6	0.996711	0.993404	0.993404	0	6
2.01623	4.96059	2.85498	-0.222149	5.32511	0.669042	5.46121	2.03453	5.4754	1.63159	-0.39302	5.77405	0.643787	7.34394	0.996711	0.993404	0.993404	0	6	0.996711	0.993404	0.993404	0	6
2.44794	5.64969	3.57002	-0.221148	5.30477	0.634282	5.26507	2.46628	6.19699	2.23099	-0.359526	5.73025	0.584099	7.16704	0.996711	0.993404	0.993404	0	6	0.996711	0.993404	0.993404	0	6
2.62318	4.7372	2.46763	0.0886727	5.12163	0.891036	4.80967	2.64204	5.32158	1.03101	-0.0177849	5.52361	0.814406	6.75634	0.996711	0.993404	0.993404	0	6	0.996711	0.993404	0.993404	0	6
2.89211	4.50955	2.86912	0.0798312	4.86441	1.17777	4.89512	2.90773	5.09294	1.29794	0.00905777	5.24491	1.08995	6.69236	0.996711	0.993404	0.993404	0	6	0.996711	0.993404	0.993404	0	6
3.33403	4.16321	1.82717	-0.0667513	4.88736	1.12907	4.88222	3.35265	4.80154	0.223542	-0.109963	5.24454	1.00946	6.83628	0.996711	0.993404	0.993404	0	6	0.996711	0.993404	0.993404	0	6
3.4812	4.20748	1.33718	0.120435	4.17685	1.82261	4.39026	3.5142	5.03516	-0.154261	0.0940053	4.50366	1.61594	7.16098	0.996711	0.993404	0.993404	0	6	0.996711	0.993404	0.993404	0	6
3.24547	4.2971	-0.0726828	-0.00205614	3.7236	2.19606	4.24464	3.28346	5.27031	-1.61483	0.00435029	4.01917	1.91204	7.50436	0.996711	0.993404	0.993404	0	6	0.996711	0.993404	0.993404	0	6
2.92039	4.54029	-0.595005	0.38457	3.32048	2.67542	4.15699	2.96132	5.66543	-2.23133	0.42986	3.58253	2.30722	7.88111	0.996711	0.993404	0.993404	0	6	0.996711	0.993404	0.993404	0	6
3.12114	4.85964	-1.00313	0.590519	3.18905	2.66174	3.7776	3.16358	6.1458	-2.76512	0.679934	3.41517	2.20179	7.9612	0.996711	0.993404	0.993404	0	6	0.996711	0.993404	0.993404	0	6
3.20654	4.3374	-1.55227	0.790132	3.20767	2.85721	3.58879	3.24047	5.69943	-3.57707	0.937504	3.40014	2.33584	7.75398	0.996711	0.993404	0.993404	0	6	0.996711	0.993404	0.993404	0	6
3.36008	3.78823	-3.20072	1.04863	3.21988	2.79645	3.73184	3.38243	5.1811	-5.50244	1.25647	3.38093	2.23268	7.66927	0.996711	0.993404	0.993404	0	6	0.996711	0.993404	0.993404	0	6
3.50682	2.85032	-7.62053	1.00277	3.22307	4.87063	3.83275	3.5211	4.28805	-10.1159	1.26473	3.35294	4.26161	7.6574	0.996711	0.993404	0.993404	0	6	0.996711	0.993404	0.993404	0	6
4.95207	1.95896	-5.79666	1.31799	3.23842	9.99315	4.51621	4.96258	3.47541	-8.40281	1.62761	3.33605	9.32666	8.42475	0.996711	0.993404	0.993404	0	6	0.996711	0.993404	0.993404	0	6
6.39008	0.0301594	-7.03787	1.54309	3.22867	10.8477	5.14643	6.4166	1.84183	-9.49113	1.87978	3.28299	10.0361	10.2296	0.996711	0.993404	0.993404	0	6	0.996711	0.993404	0.993404	0	6
6.30745	-0.857841	-9.46608	1.98273	3.28155	11.9392	5.66675	6.35583	1.39184	-11.7549	2.34956	3.28061	10.9135	12.4968	0.996711	0.993404	0.993404	0	6	0.996711	0.993404	0.993404	0	6
5.40203	-0.503084	-11.2693	2.43981	3.26232	9.7232	5.85474	5.46692	2.23838	-13.5575	2.85674	3.19587	8.44518	14.4861	0.996711	0.993404	0.993404	0	6	0.996711	0.993404	0.993404	0	6
5.1714	-0.66915	-11.868	2.94464	3.27275	9.73109	5.03305	5.23946	2.52479	-14.4149	3.44073	3.13447	8.19979	15.0545	0.996711	0.993404	0.993404	0	6	0.996711	0.993404	0.993404	0	6
5.81775	-1.62784	-13.0868	3.32628	3.2893	10.8694	4.8356	5.86405	1.81642	-16.2598	3.93901	3.08242	9.15394	15.0795	0.996711	0.993404	0.993404	0	6	0.996711	0.993404	0.993404	0	6
5.34796	-1.85499	-12.9625	3.58902	3.8077	10.2982	5.24647	5.36797	1.77113	-16.7827	4.32483	3.53344	8.42575	15.3835	0.996711	0.993404	0.993404	0	6	0.996711	0.993404	0.993404	0	6
4.70069	-2.22011	-13.4536	3.96227	4.15944	10.0376	4.96266	4.70078	1.61859	-17.7814	4.813	3.8156	7.99845	15.2056	0.996711	0.993404	0.993404	0	6	0.996711	0.993404	0.993404	0	6
4.07529	-2.20495	-13.663	4.03297	4.52083	9.28148	4.75931	4.04889	1.7602	-18.5378	5.00458	4.11052	7.11021	14.6975	0.996711	0.993404	0.993404	0	6	0.996711	0.993404	0.993404	0	6
3.66978	-1.87029	-12.364	4.00383	4.82884	8.84558	4.47117	3.61475	2.15841	-17.7416	5.0936	4.35594	6.57108	13.8631	0.996711	0.993404	0.993404	0	6	0.996711	0.993404	0.993404	0	6
3.27155	-0.652413	-10.1617	4.07506	5.13469	8.97376	4.11558	3.18746	3.38516	-15.9629	5.27571	4.60399	6.62346	12.7879	0.996711	0.993404	0.993404	0	6	0.996711	0.993404	0.993404	0	6
3.07755	-1.02477	-5.68179	4.25416	5.3036	9.29459	3.50084	2.9635	2.95762	-11.8256	5.55662	4.72145	6.90081	11.2488	0.996711	0.993404	0.993404	0	6	0.996711	0.993404	0.993404	0	6
2.9576	0.284515	-6.26746	4.41409	5.26367	9.26065	3.47286	2.81072	4.11972	-12.6898	5.80884	4.63904	6.86835	9.97023	0.996711	0.993404	0.993404	0	6	0.996711	0.993404	0.993404	0	6
3.17351	1.68506	-4.9313	4.28666	5.29029	9.60673	2.86414	3.00209	5.38624	-11.4116	5.74941	4.62857	7.22129	8.35091	0.996711	0.993404	0.993404	0	6	0.996711	0.993404	0.993404	0	6
2.57315	3.14642	-1.9787	4.25413	5.3189	9.87045	2.41659	2.37462	6.63548	-8.45958	5.77312	4.62948	7.53078	6.62972	0.996711	0.993404	0.993404	0	6	0.996711	0.993404	0.993404	0	6
2.65923	2.51613	1.33764	4.12646	5.2853	9.92346	1.8049	2.43555	5.75097	-5.01867	5.68273	4.57711	7.65618	4.69088	0.996711	0.993404	0.993404	0	6	0.996711	0.993404	0.993404	0	6
2.7745	3.0361	2.44117	4.10593	5.27652	10.1642	2.05291	2.52595	5.95889	-3.69262	5.68148	4.55978	8.00226	3.47759	0.996711	0.993404	0.993404	0	6	0.996711	0.993404	0.993404	0	6
2.47116	4.11549	4.69905	4.19716	5.23932	10.2378	1.93836	2.21089	6.8033	-0.951656	5.75963	4.51824	8.16093	2.45875	0.996711	0.993404	0.993404	0	6	0.996711	0.993404	0.993404	0	6
2.58929	4.20582	5.74654	4.20003	5.2074	10.356	1.46539	2.3205	6.6725	0.664561	5.73202	4.48724	8.36329	1.23668	0.996711	0.993404	0.993404	0	6	0.996711	0.993404	0.993404	0	6
2.76911	4.13311	8.34513	3.89027	5.20829	10.3789	1.45775	2.48878	6.33644	3.82139	5.38239	4.49642	8.49035	0.328189	0.996711	0.993404	0.993404	0	6	0.996711	0.993404	0.993404	0	6
3.29358	3.7593	8.98807	3.67418	5.17971	10.2888	1.63071	3.00747	5.73953	5.12788	5.10727	4.47989	8.49295	0	0.996711	0.993404	0.993404	0	6	0.996711	0.993404	0.993404	0	6
3.1099	3.77805	8.36565	3.65555	5.1524	10.1835	1.90384	2.82445	5.60361	5.24155	5.01502	4.46561	8.45491	0.0132214	0.996711	0.993404	0.993404	0	6	0.996711	0.993404	0.993404	0	6
3.22955	2.9728	7.49905	3.74269	5.20456	9.97811	1.89892	2.94947	4.71438	5.1496	5.01702	4.52996	8.28678	0.100463	0.996711	0.993404	0.993404	0	6	0.996711	0.993404	0.993404	0	6
3.17522	4.0311	7.01851	3.72162	5.3543	9.71371	2.14394	2.89856	5.70706	5.37166	4.9099	4.69191	8.0475	0.481276	0.996711	0.993404	0.993404	0	6	0.996711	0.993404	0.993404	0	6
3.12467	4.00805	6.22618	3.62269	5.49727	9.48921	1.68791	2.85326	5.67303	5.25457	4.72147	4.84468	7.82154	0.387242	0.996711	0.993404	0.993404	0	6	0.996711	0.993404	0.993404	0	6
3.14389	4.41558	5.83436	4.01375	5.92458	9.42433	1.65432	2.86817	6.01075	5.35167	5.03388	5.2838	7.77237	0.343728	0.996711	0.993404	0.993404	0	6	0.996711	0.993404	0.993404	0	6
2.82401	4.10866	6.35339	3.51724	6.63325	9.11556	1.21727	2.54399	5.64505	6.32241	4.45738	6.00395	7.47269	0	0.996711	0.993404	0.993404	0	6	0.996711	0.993404	0.993404	0	6
2.69675	4.53258	5.06093	3.30349	7.33311	8.6853	1.32573	2.40682	5.96088	5.36266	4.17012	6.71759	7.06913	0	0.996711	0.993404	0.993404	0	6	0.996711	0.993404	0.993404	0	6
2.75089	4.53494	4.14318	3.20482	7.96818	8.61931	1.06257	2.45567	5.8948	4.79917	3.99354	7.36516	7.0149	0	0.996711	0.993404	0.993404	0	6	0.996711	0.993404	0.993404	0	6
2.57925	4.71459	4.46746	3.20039	8.62613	8.29498	0.971922	2.27642	5.9868	5.3764	3.91921	8.03624	6.70942	0	0.996711	0.993404	0.993404	0	6	0.996711	0.993404	0.993404	0	6
2.71354	4.79339	3.62736	3.30152	9.10152	8.19491	0.685006	2.40459	5.98726	4.75427	3.95307	8.52437	6.62549	0	0.996711	0.993404	0.993404	0	6	0.996711	0.993404	0.993404	0	6
2.73882	4.81254	2.29877	3.20463	9.79679	8.07622	0.471054	2.42249	5.9114	3.55285	3.79809	9.23298	6.5308	0	0.996711	0.993404	0.993404	0	6	0.996711	0.993404	0.993404	0	6
2.57618	4.827	2.38219	3.30489	10.4599	8.05947	0.357152	2.2528	5.82245	3.69965	3.84792	9.91001	6.54414	0	0.996711	0.993404	0.993404	0	6	0.996711	0.993404	0.993404	0	6
2.94195	4.85297	2.4194	3.20733	10.5271	7.87015	0.154394	2.61358	5.75007	3.77169	3.7047	9.99122	6.38639	0	0.996711	0.993404	0.993404	0	6	0.996711	0.993404	0.993404	0	6
3.13114	4.62699	2.66877	3.20511	10.5505	7.67195	0.149362	2.7986	5.42028	4.0045	3.66447	10.0293	6.22555	0	0.996711	0.993404	0.993404	0	6	0.996711	0.993404	0.993404	0	6
3.35353	4.79812	2.4296	3.19851	10.7003	7.61696	0.232727	3.02001	5.50241	3.75417	3.62179	10.1934	6.20596	0	0.996711	0.993404	0.993404	0	6	0.996711	0.993404	0.993404	0	6
3.20172	4.36404	3.38587	2.99765	10.6118	7.38036	0.144344	2.87157	5.01067	4.7376	3.38299	10.1181	5.99525	0	0.996711	0.993404	0.993404	0	6	0.996711	0.993404	0.993404	0	6
3.06617	3.95466	3.35093	2.80157	10.5881	7.21842	0.346742	2.73962	4.5437	4.70507	3.15278	10.1074	5.86051	0	0.996711	0.993404	0.993404	0	6	0.996711	0.993404	0.993404	0	6
3.3719	3.74492	3.03755	2.70376	10.5888	7.91339	0.584021	3.05311	4.31313	4.45758	3.01514	10.1191	6.56915	0	0.996711	0.993404	0.993404	0	6	0.996711	0.993404	0.993404	0	6
3.41845	4.22341	3.86866	2.50482	10.4534	7.87164	0.877173	3.11065	4.80827	5.42146	2.76874	9.99201	6.5248	0.21301	0.996711	0.993404	0.993404	0	6	0.996711	0.993404	0.993404	0	6
3.17691	4.74107	4.59148	2.52026	10.2792	7.78079	0.830475	2.88213	5.38056	6.31873	2.73121	9.82261	6.41274	0.331065	0.996711	0.993404	0.993404	0	6	0.996711	0.993404	0.993404	0	6
3.01143	3.88748	2.97412	2.44107	10.3961	7.54892	0.623651	2.72532	4.56293	4.81479	2.60297	9.94277	6.16206	0.208961	0.996711	0.993404	0.993404	0	6	0.996711	0.993404	0.993404	0	6
3.25849	3.83913	4.23015	2.44476	10.3363	7.38644	0.938936	2.97562	4.50869	6.11234	2.56269	9.88627	5.99401	0.419324	0.996711	0.993404	0.993404	0	6	0.996711	0.993404	0.993404	0	6
3.49879	3.49828	4.2018	2.46769	10.246	7.29089	0.971843	3.22348	4.20752	6.1874	2.53581	9.79577	5.87352	0.621039	0.996711	0.993404	0.993404	0	6	0.996711	0.993404	0.993404	0	6
3.37242	3.07429	3.9364	2.48607	10.305	7.34924	1.1287	3.10282	3.81963	5.98767	2.50761	9.85246	5.90496	0.93142	0.996711	0.993404	0.993404	0	6	0.996711	0.993404	0.993404	0	6
3.386	2.99769	3.7213	2.50452	10.1499	7.28572	1.28332	3.12278	3.79778	5.83232	2.48054	9.69198	5.8043	1.33689	0.996711	0.993404	0.993404	0	6	0.996711	0.993404	0.993404	0	6
3.36785	3.04075	2.73442	2.42199	10.1094	7.17044	1.33342	3.11108	3.91162	4.88434	2.35542	9.64281	5.64212	1.70752	0.996711	0.993404	0.993404	0	6	0.996711	0.993404	0.993404	0	6
3.21762	3.21443	2.77468	2.14231	10.106	7.02267	1.33319	2.96591	4.15869	4.92029	2.03851	9.62769	5.44281	2.01982	0.996711	0.993404	0.993404	0	6	0.996711	0.993404	0.993404	0	6
2.88807	3.43026	2.30273	2.16169	10.106	7.16856	1.37287	2.63907	4.43618	4.38976	2.02726	9.61396	5.53872	2.29285	0.996711	0.993404	0.993404	0	6	0.996711	0.993404	0.993404	0	6
2.91642	3.70059	2.83898	2.11061	10.0684	7.30443	1.3014	2.66898	4.76205	4.83568	1.95045	9.56041	5.62501	2.41457	0.996711	0.993404	0.993404	0	6	0.996711	0.993404	0.993404	0	6
2.87517	3.60374	2.58256	2.35899	10.0616	7.534	1.24741	2.6273	4.7014	4.45014	2.17863	9.53639	5.81135	2.4517	0.996711	0.993404	0.993404	0	6	0.996711	0.993404	0.993404	0	6
2.73455	3.3168	1.90942	2.5065	10.2899	7.75701	1.20071	2.48543	4.43619	3.63187	2.30947	9.74655	5.99668	2.43161	0.996711	0.993404	0.993404	0	6	0.996711	0.993404	0.993404	0	6
2.98461	2.79258	2.17857	2.25642	10.5851	8.05625	1.21318	2.73432	3.9252	3.75654	2.04472	10.0227	6.26214	2.44343	0.996711	0.993404	0.993404	0	6	0.996711	0.993404	0.993404	0	6
3.013	2.75597	3.20475	2.09497	10.8178	8.40996	1.56575	2.76226	3.89893	4.64864	1.86967	10.2353	6.58403	2.79831	0.996711	0.993404	0.993404	0	6	0.996711	0.993404	0.993404	0	6
2.92558	2.31679	2.34308	2.24144	11.0593	8.84563	1.68724	2.6801	3.52219	3.72613	1.99855	10.4531	6.96779	3.20052	0.996711	0.993404	0.993404	0	6	0.996711	0.993404	0.993404	0	6
2.60992	2.80935	2.28731	2.17218	11.3493	8.95476	1.83502	2.3694	4.08517	3.58777	1.91615	10.7171	7.01988	3.64557	0.996711	0.993404	0.993404	0	6	0.996711	0.993404	0.993404	0	6
2.70492	3.20252	2.45333	2.21568	11.5148	9.17551	1.59868	2.47002	4.5669	3.66198	1.95023	10.8533	7.17439	3.77286	0.996711	0.993404	0.993404	0	6	0.996711	0.993404	0.993404	0	6
2.75063	3.1354	1.61346	2.0582	11.8049	9.39329	1.41323	2.51577	4.54276	2.63932	1.794	11.1142	7.34176	3.68747	0.996711	0.993404	0.993404	0	6	0.996711	0.993404	0.993404	0	6
2.67298	3.19646	2.79713	1.99166	11.9862	9.52386	1.50501	2.4353	4.61098	3.60419	1.73428	11.2668	7.43661	3.70117	0.996711	0.993404	0.993404	0	6	0.996711	0.993404	0.993404	0	6
2.86249	2.99942	3.30087	2.02899	12.2027	9.81923	1.48372	2.62464	4.43308	3.93566	1.77677	11.4534	7.69349	3.6879	0.996711	0.993404	0.993404	0	6	0.996711	0.993404	0.993404	0	6
2.77413	3.1335	2.96273	2.06342	12.4521	10.0672	1.56483	2.53615	4.57856	3.43258	1.81783	11.6728	7.90723	3.74974	0.996711	0.993404	0.993404	0	6	0.996711	0.993404	0.993404	0	6
2.66297	3.39192	2.76135	1.80168	12.6292	10.2093	1.50438	2.42635	4.85571	3.09396	1.56236	11.8191	8.01339	3.72102	0.996711	0.993404	0.993404	0	6	0.996711	0.993404	0.993404	0	6
2.37286	3.62883	2.74812	1.63849	12.8888	10.5655	1.5096	2.13687	5.09963	2.93933	1.40763	12.048	8.33908	3.70426	0.996711	0.993404	0.993404	0	6	0.996711	0.993404	0.993404	0	6
2.5531	3.00745	2.33609	1.57483	13.1701	10.8375	1.50004	2.31807	4.48194	2.39895	1.35296	12.2985	8.5832	3.6677	0.996711	0.993404	0.993404	0	6	0.996711	0.993404	0.993404	0	6
2.47939	3.19496	2.76884	1.69624	13.3061	10.8987	1.77194	2.24584	4.6727	2.71902	1.48352	12.4037	8.61785	3.92143	0.996711	0.993404	0.993404	0	6	0.996711	0.993404	0.993404	0	6
2.36591	3.96805	3.2904	1.73099	13.4524	11.0638	1.63162	2.13791	5.48836	3.18747	1.52396	12.5171	8.74179	3.97008	0.996711	0.993404	0.993404	0	6	0.996711	0.993404	0.993404	0	6
2.25812	4.64359	3.44225	1.27162	13.5687	11.1682	1.30509	2.03194	6.1773	3.2329	1.07643	12.6012	8.81568	3.665	0.996711	0.993404	0.993404	0	6	0.996711	0.993404	0.993404	0	6
2.30681	4.67716	3.67339	1.39675	13.5957	11.1318	1.24825	2.07757	6.17023	3.30241	1.21922	12.5986	8.7711	3.35958	0.996711	0.993404	0.993404	0	6	0.996711	0.993404	0.993404	0	6
2.29453	5.04485	3.78251	1.22319	13.666	11.1826	1.16	2.06362	6.4922	3.29227	1.06032	12.6405	8.81909	3.03524	0.996711	0.993404	0.993404	0	6	0.996711	0.993404	0.993404	0	6
2.17341	5.16269	4.42729	1.34805	13.7074	11.1954	1.10147	1.9414	6.55416	3.84773	1.19756	12.6553	8.83627	2.72315	0.996711	0.993404	0.993404	0	6	0.996711	0.993404	0.993404	0	6
2.36015	5.57724	3.55289	1.2725	13.6981	11.075	0.960551	2.12839	6.91195	2.92354	1.13095	12.6208	8.72355	2.35798	0.996711	0.993404	0.993404	0	6	0.996711	0.993404	0.993404	0	6
2.29726	5.32159	3.30575	1.09645	13.8061	11.2953	0.835649	2.06551	6.58532	2.6422	0.962159	12.7057	8.95986	1.96455	0.996711	0.993404	0.993404	0	6	0.996711	0.993404	0.993404	0	6
2.36178	5.44191	3.5356	0.91028	13.8011	11.3038	1.03092	2.13037	6.625	2.86247	0.780482	12.6796	8.9911	1.87427	0.996711	0.993404	0.993404	0	6	0.996711	0.993404	0.993404	0	6
2.63325	5.07859	4.06328	1.0216	13.7854	11.2822	1.09465	2.40717	6.22145	3.46312	0.888605	12.6427	8.97908	1.88852	0.996711	0.993404	0.993404	0	6	0.996711	0.993404	0.993404	0	6
2.59499	4.90736	3.62209	0.832568	13.7962	11.3556	1.19953	2.37528	6.02607	3.10988	0.694669	12.6322	9.05622	2.02363	0.996711	0.993404	0.993404	0	6	0.996711	0.993404	0.993404	0	6
2.79988	4.85343	3.56194	0.939221	13.753	11.3278	1.40101	2.58715	5.96378	3.14073	0.795973	12.5676	9.02548	2.32311	0.996711	0.993404	0.993404	0	6	0.996711	0.993404	0.993404	0	6
2.53974	4.68128	2.22581	0.749418	13.6369	11.1643	1.39479	2.33599	5.81763	1.91177	0.599663	12.4283	8.84462	2.56807	0.996711	0.993404	0.993404	0	6	0.996711	0.993404	0.993404	0	6
2.63304	4.66837	0.998165	0.654911	13.6626	11.1489	1.53747	2.43595	5.82768	0.742794	0.503338	12.4306	8.81072	2.90705	0.996711	0.993404	0.993404	0	6	0.996711	0.993404	0.993404	0	6
2.46452	4.45077	0.373492	0.662887	13.5347	10.9866	1.61155	2.27445	5.65235	0.167189	0.51117	12.2778	8.62066	3.2449	0.996711	0.993404	0.993404	0	6	0.996711	0.993404	0.993404	0	6
2.80631	4.69014	-0.366418	0.870443	13.5114	10.916	1.68894	2.62195	5.93861	-0.557503	0.722612	12.2285	8.51835	3.57214	0.996711	0.993404	0.993404	0	6	0.996711	0.993404	0.993404	0	6
2.81236	4.39509	-1.11825	0.585843	13.4439	11.0374	1.52798	2.63277	5.69599	-1.32094	0.445545	12.1341	8.60397	3.65565	0.996711	0.993404	0.993404	0	6	0.996711	0.993404	0.993404	0	6
3.03919	4.46034	-0.626116	0.486518	13.4511	10.9692	1.8232	2.86001	5.78055	-0.908587	0.360861	12.1152	8.5116	3.99703	0.996711	0.993404	0.993404	0	6	0.996711	0.993404	0.993404	0	6
3.01995	4.05824	-0.644695	0.392146	13.4335	10.8926	1.86608	2.84508	5.43869	-0.955291	0.278135	12.0693	8.39465	4.28995	0.996711	0.993404	0.993404	0	6	0.996711	0.993404	0.993404	0	6
3.32455	3.9683	-1.24367	0.292532	13.3788	10.8855	2.06491	3.15237	5.40526	-1.6143	0.194463	11.9857	8.34691	4.68965	0.996711	0.993404	0.993404	0	6	0.996711	0.993404	0.993404	0	6
3.2282	3.62339	-1.55945	0.29422	13.3784	10.9065	2.20252	3.05984	5.13824	-1.98238	0.213179	11.9544	8.31754	5.11387	0.996711	0.993404	0.993404	0	6	0.996711	0.993404	0.993404	0	6
3.30106	3.68312	-2.87595	0.393655	13.4234	10.8718	2.32594	3.13629	5.28811	-3.36534	0.332819	11.9669	8.22543	5.55293	0.996711	0.993404	0.993404	0	6	0.996711	0.993404	0.993404	0	6
3.23691	3.71944	-3.23154	0.302642	13.4039	10.918	2.26695	3.07476	5.41972	-3.81147	0.266196	11.9134	8.20987	5.80031	0.996711	0.993404	0.993404	0	6	0.996711	0.993404	0.993404	0	6
3.55759	3.9705	-1.93346	0.205045	13.3967	10.8895	2.39642	3.39287	5.72439	-2.67856	0.201301	11.8728	8.13413	5.99327	0.996711	0.993404	0.993404	0	6	0.996711	0.993404	0.993404	0	6
3.64775	4.22142	-2.16147	0.208171	13.4225	10.9522	2.44299	3.48028	6.02342	-3.0646	0.238173	11.8653	8.15212	6.07694	0.996711	0.993404	0.993404	0	6	0.996711	0.993404	0.993404	0	6
3.39711	3.5445	-2.62582	0.312366	13.2627	10.7834	2.39569	3.22652	5.38639	-3.68027	0.376934	11.6725	7.9422	6.02944	0.996711	0.993404	0.993404	0	6	0.996711	0.993404	0.993404	0	6
3.01085	4.08252	-1.88391	0.310606	13.1996	10.6782	2.56696	2.8365	5.95207	-3.08352	0.41029	11.5772	7.80158	6.14718	0.996711	0.993404	0.993404	0	6	0.996711	0.993404	0.993404	0	6
2.88538	3.84057	-1.65079	0.118072	13.22	10.6326	2.33059	2.70967	5.75573	-2.94779	0.249715	11.5647	7.71433	5.96245	0.996711	0.993404	0.993404	0	6	0.996711	0.993404	0.993404	0	6
3.08857	4.14914	-0.90964	0.213707	13.1702	10.6069	2.47877	2.9073	6.06582	-2.34746	0.381556	11.4843	7.66468	5.93878	0.996711	0.993404	0.993404	0	6	0.996711	0.993404	0.993404	0	6
2.80523	3.85029	-1.29845	0.118278	13.1802	10.6077	2.34408	2.62134	5.78647	-2.81457	0.317244	11.4638	7.63627	5.75161	0.996711	0.993404	0.993404	0	6	0.996711	0.993404	0.993404	0	6
2.70821	3.96696	-1.22025	0.214201	13.0802	10.476	2.48312	2.51957	5.89612	-2.82632	0.445209	11.3353	7.48665	5.71491	0.996711	0.993404	0.993404	0	6	0.996711	0.993404	0.993404	0	6
2.7561	4.45938	-1.00236	0.31708	13.0206	10.4032	2.392	2.56544	6.39985	-2.64054	0.574911	11.2473	7.39034	5.56674	0.996711	0.993404	0.993404	0	6	0.996711	0.993404	0.993404	0	6
2.58042	4.55244	-0.618371	0.224843	13.0594	10.4593	2.14621	2.38629	6.48748	-2.29336	0.50941	11.2593	7.43014	5.18781	0.996711	0.993404	0.993404	0	6	0.996711	0.993404	0.993404	0	6
2.37969	4.55159	-0.24985	0.0258283	12.9472	10.3251	2.12503	2.17913	6.44329	-1.98104	0.337835	11.1233	7.296	4.8601	0.996711	0.993404	0.993404	0	6	0.996711	0.993404	0.993404	0	6
2.41854	4.88707	1.11739	0.0274073	12.9126	10.3294	2.20504	2.21309	6.73493	-0.621656	0.361378	11.0668	7.30334	4.67104	0.996711	0.993404	0.993404	0	6	0.996711	0.993404	0.993404	0	6
2.24531	5.19747	0.0821065	0.0318044	12.8972	10.333	2.17583	2.0359	6.99883	-1.62931	0.38309	11.0314	7.31327	4.39201	0.996711	0.993404	0.993404	0	6	0.996711	0.993404	0.993404	0	6
2.31417	4.50737	0.360324	0.0300341	12.8689	10.3959	2.13635	2.10026	6.24696	-1.30942	0.395518	10.9856	7.39042	4.05374	0.996711	0.993404	0.993404	0	6	0.996711	0.993404	0.993404	0	6
2.31788	5.15725	1.76455	-0.278365	12.7838	10.3144	2.42671	2.10066	6.83566	0.173504	0.0960083	10.885	7.32537	4.08166	0.996711	0.993404	0.993404	0	6	0.996711	0.993404	0.993404	0	6
2.31549	4.6722	2.49569	-0.278442	12.8207	10.349	2.43362	2.0988	6.3222	1.04915	0.0971225	10.9065	7.36492	4.0184	0.996711	0.993404	0.993404	0	6	0.996711	0.993404	0.993404	0	6
2.38132	4.48577	2.73271	-0.283065	12.7071	10.1905	2.6955	2.16366	6.09673	1.41382	0.0931066	10.7792	7.21563	4.1563	0.996711	0.993404	0.993404	0	6	0.996711	0.993404	0.993404	0	6
2.10046	4.14038	2.42978	-0.378545	12.6458	10.1573	2.78795	1.88588	5.75666	1.29479	-0.00830928	10.7033	7.17419	4.35623	0.996711	0.993404	0.993404	0	6	0.996711	0.993404	0.993404	0	6
2.13413	4.24883	2.14549	-0.380221	12.6476	10.159	3.05655	1.92069	5.86574	1.15766	-0.0142384	10.6908	7.16766	4.6852	0.996711	0.993404	0.993404	0	6	0.996711	0.993404	0.993404	0	6
2.23541	4.20587	1.82711	-0.281977	12.5725	10.0279	3.12213	2.02446	5.84864	0.994934	0.0779006	10.6005	7.01696	4.92314	0.996711	0.993404	0.993404	0	6	0.996711	0.993404	0.993404	0	6
2.01521	4.53696	1.93863	-0.481705	12.5103	9.99388	3.10352	1.80576	6.21194	1.23353	-0.126278	10.5226	6.95847	5.07994	0.996711	0.993404	0.993404	0	6	0.996711	0.993404	0.993404	0	6
1.98401	4.65699	3.35206	-0.58007	12.4994	10.0128	3.05175	1.77425	6.35966	2.73563	-0.226389	10.4958	6.95263	5.15329	0.996711	0.993404	0.993404	0	6	0.996711	0.993404	0.993404	0	6
1.89349	5.08024	4.09206	-0.479354	12.3583	9.86635	3.03908	1.68151	6.79969	3.52918	-0.124917	10.339	6.78417	5.19194	0.996711	0.993404	0.993404	0	6	0.996711	0.993404	0.993404	0	6
1.85512	4.78427	3.45779	-0.567924	12.3155	9.92675	2.81723	1.6401	6.51506	2.93299	-0.211894	10.2807	6.82402	4.98638	0.996711	0.993404	0.993404	0	6	0.996711	0.993404	0.993404	0	6
1.57889	4.59128	3.44243	-0.573075	12.1799	9.82373	3.09031	1.35558	6.27725	2.88679	-0.210397	10.1325	6.72258	4.98992	0.996711	0.993404	0.993404	0	6	0.996711	0.993404	0.993404	0	6
1.68235	4.60304	4.35102	-0.577795	12.0813	9.71492	3.24974	1.45534	6.27421	3.8402	-0.215907	10.021	6.60575	5.06774	0.996711	0.993404	0.993404	0	6	0.996711	0.993404	0.993404	0	6
1.94056	4.63609	4.26931	-0.675355	12.0663	9.69513	3.2625	1.71257	6.31727	3.84048	-0.31823	9.99247	6.56843	5.13344	0.996711	0.993404	0.993404	0	6	0.996711	0.993404	0.993404	0	6
1.75935	4.84202	4.42987	-0.773701	11.8918	9.56536	3.39012	1.52873	6.52085	4.0554	-0.419709	9.80499	6.42519	5.24261	0.996711	0.993404	0.993404	0	6	0.996711	0.993404	0.993404	0	6
2.04157	5.22673	3.61512	-0.876732	11.6601	9.38156	3.49607	1.80769	6.89598	3.28537	-0.525817	9.56079	6.23067	5.29493	0.996711	0.993404	0.993404	0	6	0.996711	0.993404	0.993404	0	6
2.01786	5.36536	4.13996	-0.671676	11.594	9.30727	3.45603	1.7825	7.04111	3.87806	-0.326491	9.48176	6.13944	5.28869	0.996711	0.993404	0.993404	0	6	0.996711	0.993404	0.993404	0	6
1.86405	5.6389	4.6646	-0.766475	11.4285	9.20833	3.38136	1.62463	7.29666	4.43233	-0.424478	9.30455	6.03273	5.11848	0.996711	0.993404	0.993404	0	6	0.996711	0.993404	0.993404	0	6
1.94405	5.67384	5.96138	-0.863133	11.2564	9.09381	3.38109	1.69909	7.29131	5.7435	-0.523972	9.12229	5.92007	4.92228	0.996711	0.993404	0.993404	0	6	0.996711	0.993404	0.993404	0	6
1.86401	4.96702	6.12195	-0.95975	11.18	9.00573	3.4195	1.61521	6.54965	5.94981	-0.627183	9.03631	5.83329	4.81739	0.996711	0.993404	0.993404	0	6	0.996711	0.993404	0.993404	0	6
1.95635	5.32845	4.76071	-0.859604	10.9198	8.90642	3.76043	1.7049	6.88117	4.65462	-0.536461	8.76708	5.73437	5.05675	0.996711	0.993404	0.993404	0	6	0.996711	0.993404	0.993404	0	6

## Sheet: OptimalControlAnalysis_VSTAR
VSTAR: without the stability help																									VSTAR: with the stability help
y1sc							ydsc							Summary1c					Summary1d						y1sc							ydsc							Summary1c					Summary1d
s	p	ip	u	TS	PS	R	s	p	ip	u	TS	PS	R	ME: A	MAX EIG: A-Bu	MAX EIG: FINAL	Piter	Controllability	ME: A	MAX EIG: A-Bu	MAX EIG: FINAL	Piter	Controllability		s	p	ip	u	TS	PS	R	s	p	ip	u	TS	PS	R	ME: A	MAX EIG: A-Bu	MAX EIG: FINAL	Piter	Controllability	ME: A	MAX EIG: A-Bu	MAX EIG: FINAL	Piter	Controllability
1.11	11.6517	1.41123	-0.226667	4.20751	1.58223	10.94	1.11	11.6517	1.41123	-0.226667	4.20751	1.58223	10.94	0	0	0	0	0	0	0	0	0	0		1.11	11.6517	1.41123	-0.226667	4.20751	1.58223	10.94	1.11	11.6517	1.41123	-0.226667	4.20751	1.58223	10.94	0	0	0	0	0	0	0	0	0	0
1.11106	12.3787	0.936577	-0.334099	4.21322	1.59177	10.6449	1.11106	12.3787	0.936577	-0.334099	4.21322	1.59177	10.6449	1.05636	0.953492	0.953492	0	6	1.05636	0.953492	0.953492	0	6		1.02388	11.8988	0.0565728	-0.219422	4.22437	1.74652	8.14017	1.18575	11.0453	-0.444434	-0.0247794	3.92491	1.73769	8.14017	1.05636	0.953492	0.993409	0	6	1.05636	0.953492	0.993409	0	6
0.79731	11.8808	0.274128	-0.305142	4.20014	1.61986	12.1089	0.733866	11.6099	0.20349	-0.324534	4.21224	1.64578	11.7243	1.05401	0.95369	0.95369	0	6	1.05373	0.953819	0.953819	0	6		0.552933	10.9764	-0.999073	-0.0465549	4.22794	1.82178	8.27883	1.27754	10.494	-1.73495	0.139345	3.65239	1.90594	6.07128	1.05401	0.95369	0.993409	0	6	1.06141	0.955532	0.993409	0	6
1.63225	11.7215	-0.70397	-0.344935	4.24565	1.68029	11.0788	1.54403	11.2785	-0.429499	-0.532873	4.21495	1.76451	11.2953	1.05655	0.953465	0.953465	0	6	1.05399	0.953685	0.953685	0	6		1.54395	11.4492	-0.880676	-0.229825	4.24677	1.75315	10.325	1.37943	9.9984	-2.61422	0.277176	3.38884	2.07872	4.59851	1.05655	0.953465	0.993409	0	6	1.07376	0.957599	0.993409	0	6
1.83878	11.32	-0.952594	-0.300025	4.07592	1.73822	12.1752	1.50875	10.4612	-0.591208	-0.44978	4.07006	1.74037	11.9376	1.05411	0.953619	0.953619	0	6	1.04938	0.956519	0.956519	0	6		1.64203	10.7005	-1.63388	-0.0999096	4.09541	1.84739	9.97808	1.48688	9.55718	-3.2037	0.398135	3.13327	2.25034	3.60456	1.05411	0.953619	0.993409	0	6	1.08619	0.956098	0.993409	0	6
1.33838	12.5097	-1.02887	0.0257714	4.05871	1.64161	9.25033	1.49575	12.0045	0.100203	-0.32499	4.01099	1.70089	11.1702	1.05655	0.953465	0.953465	0	6	1.05113	0.955019	0.955019	0	6		1.21779	12.4423	-0.280169	0.178569	4.04649	1.62201	10.6994	1.59649	9.16744	-3.59763	0.509818	2.88487	2.41713	2.98864	1.05655	0.953465	0.993409	0	6	1.09746	0.947853	0.993409	0	6
0.572865	11.047	-1.7425	0.241682	4.09385	1.61882	8.7076	1.11108	10.9544	-0.831936	-0.440677	3.97711	1.83339	10.3201	1.06421	0.957528	0.957528	0	6	1.05396	0.953715	0.953715	0	6		0.751767	11.3751	-1.22961	0.21743	4.04187	1.77309	9.88461	1.70572	8.82537	-3.86767	0.61823	2.643	2.57697	2.66514	1.06421	0.957528	0.993409	0	6	1.12585	0.932695	0.993409	0	6
1.31399	9.68645	-4.00325	0.370256	4.34471	1.66582	7.52808	1.20159	9.9286	-2.36297	-0.435734	4.71522	1.80714	9.50692	1.0643	0.957596	0.957596	0	6	1.05126	0.955083	0.955083	0	6		1.65425	10.416	-2.78454	0.299256	4.24788	1.89354	10.4595	1.8128	8.5266	-4.06699	0.727998	2.40717	2.72887	2.56225	1.0643	0.957596	0.993409	0	6	1.14387	0.918532	0.993409	0	6
2.88799	8.15191	-5.25297	1.00002	4.38808	1.75814	7.0991	1.57178	7.5732	-1.5677	0.131711	4.88836	1.62368	11.6077	1.06438	0.957665	0.957665	0	6	1.05128	0.955192	0.955192	0	6		3.32881	9.44937	-2.84664	0.828132	4.2685	1.83687	13.2369	1.91647	8.26654	-4.23384	0.842571	2.17701	2.87268	2.62047	1.06438	0.957665	0.993409	0	6	1.14787	0.91393	0.993409	0	6
2.22932	6.70459	-8.67548	1.69846	4.46641	1.80823	0	1.85587	8.13789	-1.15995	0.102034	3.99613	1.82852	11.9935	1.09535	0.972604	0.972604	0	6	1.0655	0.958618	0.958618	0	6		2.98916	9.5723	-3.31138	1.19896	4.28818	1.49574	13.968	2.01595	8.04058	-4.3945	0.964413	1.95231	3.00883	2.79112	1.09535	0.972604	0.993409	0	6	1.1434	0.923425	0.993409	0	6
7.40779	25.4237	23.9213	-1.41383	3.08878	0.447268	87.8623	1.5325	6.89064	-6.07372	0.494842	3.97006	1.89697	2.26259	1.18163	0.989116	0.989116	0	6	1.06477	0.957984	0.957984	0	6		2.60055	8.93885	-5.90194	1.42322	4.22854	1.46549	8.6295	2.11074	7.84431	-4.56594	1.09516	1.73295	3.13815	3.03495	1.18163	0.989116	0.993409	0	6	1.13764	0.948898	0.993409	0	6
1.86232	10.0562	-6.3715	1.61626	4.19273	1.47669	8.57653	1.29664	6.08975	-8.17953	0.924384	4.0283	2.97285	0	1.1968	0.992223	0.992223	0	6	1.17693	0.905362	0.905362	0	6		1.84955	9.85359	-6.84214	1.65523	4.19445	1.57183	7.28164	2.20063	7.67354	-4.75789	1.23578	1.51892	3.26167	3.32079	1.1968	0.992223	0.993409	0	6	1.13555	0.983934	0.993409	0	6
1.34231	8.293	-6.82019	1.65143	4.15457	1.5041	5.38767	-0.0711967	5.66609	-8.44788	0.677796	4.50698	-0.838663	0.205482	1.22467	0.99789	0.99789	0	6	1.50227	0.981203	0.981203	0	6		1.52499	8.62222	-6.41997	1.60239	4.10882	1.63816	6.3682	2.28556	7.52446	-4.97469	1.38668	1.31025	3.38053	3.62435	1.22467	0.99789	0.993409	0	6	1.13837	0.982628	0.993409	0	6
2.20725	10.2263	-1.53726	1.08429	4.01524	1.40413	16.8857	-2.72241	6.29564	-7.802	-0.468418	6.05007	-8.74101	1.5546	1.21158	0.994861	0.994861	0	6	1.54647	0.989571	0.989571	0	6		1.75621	8.35708	-5.13038	1.41438	4.11952	1.68779	7.24868	2.36559	7.39364	-5.21669	1.54785	1.10707	3.49592	3.92708	1.21158	0.994861	0.993409	0	6	1.14344	0.945471	0.993409	0	6
7.09056	28.8516	29.6854	-1.82334	2.77444	0.389356	99.9276	-0.56378	4.44757	-6.72926	-0.275148	7.56852	-9.47133	1.49049	1.18264	0.989303	0.989303	0	6	1.55234	0.95662	0.95662	0	6		1.66963	9.95384	-4.70557	1.437	4.05717	1.71746	8.4727	2.44088	7.27803	-5.48144	1.71894	0.909528	3.60894	4.21523	1.18264	0.989303	0.993409	0	6	1.14684	0.894499	0.993409	0	6
7.17184	28.1502	31.0248	-1.7786	2.68448	0.478291	101.821	0.502342	3.4278	-4.17253	-0.1551	9.33988	-10.1446	1.67828	1.18277	0.989222	0.989222	0	6	1.4348	0.969009	0.969009	0	6		1.77097	9.13327	-3.70761	1.50675	3.96094	1.90944	9.41003	2.51162	7.17496	-5.76466	1.89935	0.717831	3.72065	4.47897	1.18277	0.989222	0.993409	0	6	1.14456	0.865694	0.993409	0	6
15.0467	53.2245	75.1059	-6.23199	0.949099	-0.886376	220.829	6.245	-31.4599	-12.3714	0.910211	12.223	-14.298	0	1.18331	0.989296	0.989296	0	6	1.31747	0.993881	0.993881	0	6		2.55308	9.97436	-3.41413	1.22085	3.90802	1.99081	12.1193	2.57804	7.08218	-6.06091	2.08827	0.532189	3.83197	4.71164	1.18331	0.989296	0.993409	0	6	1.2035	1.21024	0.993409	0	6
-1.0776	-1.52294	-23.0614	3.32108	4.49862	2.06595	0	-2.04096	-23.3831	-3.25766	-3.35661	14.3159	-32.5262	3.92631	1.13553	0.981256	0.981256	0	6	1.50833	0.982228	0.982228	0	6		2.24452	9.40054	-3.60329	1.45398	3.70696	1.63749	14.522	2.64037	6.99774	-6.36423	2.28478	0.35283	3.94371	4.9091	1.13553	0.981256	0.993409	0	6	1.24564	1.24644	0.993409	0	6
22.509	80.9338	124.365	-10.8555	-1.16219	-2.64123	352.603	11.8382	1.00615	-7.93026	0.706506	16.92	-17.2927	10.8063	1.18434	0.98947	0.98947	0	6	1.37879	0.918282	0.918282	0	6		1.91521	10.5619	-2.79653	1.24719	3.72273	1.56527	14.8581	2.69884	6.92004	-6.66848	2.48788	0.179984	4.05651	5.06921	1.18434	0.98947	0.993409	0	6	1.2743	1.27184	0.993409	0	6
-13.8973	-43.5679	-100.826	10.6677	7.58487	4.74248	0	54.7463	173.203	289.079	-26.5986	4.52795	-33.5378	794.676	1.16911	0.986898	0.986898	0	6	1.0968	0.973035	0.973035	0	6		2.14933	10.9524	-2.51364	1.2995	3.77593	1.64712	12.0777	2.75367	6.84776	-6.96772	2.6965	0.0138773	4.17092	5.19134	1.16911	0.986898	0.993409	0	6	1.29713	1.2923	0.993409	0	6
-12.9307	-36.7339	-88.5788	9.45817	7.20735	4.74001	0	-151.048	336.926	580.51	228.589	6.24805	-153.143	1275.21	1.16965	0.986989	0.986989	0	6	1.08587	0.992293	0.992293	0	6		1.33651	11.5075	-1.74346	1.17491	3.81885	2.12347	10.8159	2.80508	6.77983	-7.25638	2.90957	-0.145274	4.28733	5.27603	1.16965	0.986989	0.993409	0	6	1.31631	1.30959	0.993409	0	6
-1.13426	0.337315	-18.9353	3.42637	4.51818	2.18959	0	-347.178	-1066.85	-1257.74	342.46	114.843	-172.962	0	1.13764	0.981623	0.981623	0	6	1.45769	0.966143	0.966143	0	6		2.28447	11.3545	0.536254	1.54927	3.70167	1.87906	11.3669	2.85324	6.71539	-7.52942	3.12602	-0.297271	4.40602	5.32464	1.13764	0.981623	0.993409	0	6	1.33279	1.32448	0.993409	0	6
13.9159	53.4161	78.7628	-5.70023	0.856548	-0.969221	215.121	-584.473	-81.0107	-1009.2	104.579	-557.347	-282.502	36.1407	1.18638	0.98982	0.98982	0	6	0.999501	0.916266	0.916266	0	6		1.80916	11.5888	2.88047	1.50525	3.72454	1.76986	13.4464	2.89833	6.6538	-7.78244	3.3448	-0.441931	4.52717	5.33914	1.18638	0.98982	0.993409	0	6	1.34705	1.33735	0.993409	0	6
9.52335	38.5402	55.9169	-3.67771	1.80359	-0.176122	150.366	971.074	2341.3	2905.81	-227.061	-649.891	-110.434	13071.8	1.18689	0.989907	0.989907	0	6	1.45769	0.966143	0.966143	0	6		1.38007	10.2808	4.56749	1.1937	3.73164	1.73933	13.8575	2.9405	6.59455	-8.01166	3.56491	-0.579094	4.65085	5.32189	1.18689	0.989907	0.993409	0	6	1.35938	1.34842	0.993409	0	6
-1.72639	2.4322	-10.3008	2.79193	4.38956	1.82568	0	-3342.04	4499.27	9083.13	4008.86	-671.855	-2652.38	21294.9	1.13925	0.981898	0.981898	0	6	1.08587	0.992293	0.992293	0	6		0.851568	10.922	4.83094	1.3404	3.77536	1.48546	14.4305	2.97987	6.53729	-8.21398	3.78537	-0.708627	4.77704	5.27547	1.13925	0.981898	0.993409	0	6	1.37	1.35786	0.993409	0	6
-4.12193	-7.361	-28.2892	4.4889	5.03153	2.42696	0	-4006.39	-15017.7	-15011	5238.08	1018.78	-2616.83	0	1.17232	0.987435	0.987435	0	6	1.45769	0.966143	0.966143	0	6		1.01619	9.92171	2.75988	1.52378	3.81047	1.53763	13.1121	3.01658	6.48175	-8.38696	4.00529	-0.83042	4.90567	5.2026	1.17232	0.987435	0.993409	0	6	1.37904	1.36575	0.993409	0	6
3.60238	11.9088	8.69115	1.08143	3.43692	1.14088	33.4509	-8203.03	-17.5187	-13056.9	1228.72	-9795.48	-5599.39	659.906	1.20313	0.992716	0.992716	0	6	0.999501	0.916266	0.916266	0	6		2.40584	7.53422	0.598237	1.84123	3.71839	1.55182	11.875	3.05071	6.42777	-8.52876	4.22379	-0.944391	5.03659	5.10599	1.20313	0.992716	0.993409	0	6	1.38662	1.37218	0.993409	0	6
4.50394	12.1165	6.56888	1.41342	3.56255	1.11821	33.6706	16683.3	39957.6	49753.4	-3900.38	-11401.3	-2994.31	214063	1.24276	0.998914	0.998914	0	6	1.45769	0.966143	0.966143	0	6		3.23242	7.66914	-1.53475	2.18099	3.86331	1.43763	12.118	3.08236	6.37525	-8.63811	4.4401	-1.05048	5.1696	4.98833	1.24276	0.998914	0.993409	0	6	1.39282	1.37719	0.993409	0	6
2.88288	8.4717	-0.80045	2.16307	3.83211	1.47006	17.4913	-55185.9	74433.2	152290	66180.3	-11662.9	-45186.5	350703	1.2858	0.993979	0.993979	0	6	1.08587	0.992293	0.992293	0	6		2.52923	7.10471	-3.3749	2.40231	3.91468	1.63471	10.6084	3.11162	6.32416	-8.71427	4.65348	-1.14867	5.30446	4.85221	1.2858	0.993979	0.993409	0	6	1.3977	1.38081	0.993409	0	6
3.09877	7.27037	-3.26352	2.36856	3.83175	1.45776	15.4916	-66660	-249297	-249963	87026.8	16350.2	-44834.3	0	1.30417	0.988835	0.988835	0	6	1.45769	0.966143	0.966143	0	6		2.88295	6.23107	-5.34021	2.55517	3.88046	1.67771	9.89039	3.13856	6.2745	-8.75697	4.86326	-1.23894	5.44092	4.70009	1.30417	0.988835	0.993409	0	6	1.4013	1.38303	0.993409	0	6
3.31586	7.837	-0.743871	2.656	3.79393	1.26011	17.495	-136303	215.156	-217762	20418.1	-163607	-94341.7	11074.4	1.31279	0.985591	0.985591	0	6	0.999501	0.916266	0.916266	0	6		3.05837	6.59827	-3.21854	2.8784	3.85205	1.52181	10.8205	3.16324	6.22628	-8.76632	5.06883	-1.32134	5.57869	4.53429	1.31279	0.985591	0.993409	0	6	1.40362	1.38383	0.993409	0	6
2.36895	5.44429	-4.69976	3.01571	3.80718	1.44303	10.2435	277612	664865	825232	-64559.6	-190303	-51171.3	3.55887e+06	1.33553	0.972576	0.972576	0	6	1.45769	0.966143	0.966143	0	6		2.57188	5.86915	-4.10892	2.94964	3.75683	1.55806	11.7367	3.18574	6.17957	-8.74284	5.26963	-1.39589	5.71745	4.35698	1.33553	0.972576	0.993409	0	6	1.40461	1.38316	0.993409	0	6
2.92455	6.45064	-3.36854	3.15146	3.8431	1.5716	15.1782	-916202	1.2374e+06	2.52863e+06	1.10003e+06	-194501	-751854	5.82985e+06	1.34248	0.966672	0.966672	0	6	1.08587	0.992293	0.992293	0	6		2.84085	5.89328	-4.55434	3.25438	3.86072	1.74678	11.9519	3.20612	6.13442	-8.68731	5.46517	-1.46268	5.8569	4.17016	1.34248	0.966672	0.993409	0	6	1.40422	1.38097	0.993409	0	6
2.83218	6.49553	-5.2468	3.32073	3.8745	1.25106	12.8489	-1.10663e+06	-4.14225e+06	-4.15628e+06	1.4466e+06	271033	-746068	0	1.36082	0.943501	0.943501	0	6	1.45769	0.966143	0.966143	0	6		2.87439	6.42103	-5.52543	3.33924	3.86269	1.36987	12.0469	3.22443	6.09089	-8.60079	5.65501	-1.52179	5.99671	3.97567	1.36082	0.943501	0.993409	0	6	1.4023	1.37722	0.993409	0	6
2.03839	4.36537	-8.1321	3.72579	3.89045	1.4136	6.92178	-2.26449e+06	4783.71	-3.62169e+06	339070	-2.72077e+06	-1.56968e+06	184160	1.36641	0.933424	0.933424	0	6	0.999501	0.916266	0.916266	0	6		2.41585	5.40133	-6.4273	3.55423	3.79883	1.48437	11.3779	3.24073	6.04907	-8.48455	5.83876	-1.57336	6.13658	3.77519	1.36641	0.933424	0.993409	0	6	1.39869	1.37199	0.993409	0	6
2.98238	6.22932	-7.16629	3.75075	3.98159	1.30454	10.3375	4.61639e+06	1.10555e+07	1.37177e+07	-1.07333e+06	-3.16472e+06	-852234	5.91681e+07	1.37655	0.913034	0.913034	0	6	1.45769	0.966143	0.966143	0	6		3.09235	6.49587	-6.7565	3.70775	3.9546	1.34568	11.3949	3.25509	6.00902	-8.34004	6.01608	-1.6175	6.27619	3.57027	1.37655	0.913034	0.993409	0	6	1.39312	1.36551	0.993409	0	6
3.12508	4.45778	-9.49938	3.89922	4.07953	1.3633	3.81908	-1.52313e+07	2.05731e+07	4.2037e+07	1.82885e+07	-3.23439e+06	-1.25012e+07	9.69248e+07	1.38561	0.927031	0.927031	0	6	1.08587	0.992293	0.992293	0	6		3.50069	5.70298	-7.27452	3.68605	3.99012	1.30881	9.71755	3.26757	5.97079	-8.16883	6.18669	-1.65438	6.41524	3.3623	1.38561	0.927031	0.993409	0	6	1.38523	1.35832	0.993409	0	6
3.53692	5.8376	-9.10112	4.18987	3.92938	1.35401	4.36402	-1.83975e+07	-6.88663e+07	-6.91043e+07	2.40507e+07	4.50532e+06	-1.24052e+07	0	1.38565	0.926618	0.926618	0	6	1.45769	0.966143	0.966143	0	6		3.8482	6.69683	-7.68351	4.04736	3.85387	1.40921	8.07193	3.27822	5.93444	-7.97261	6.35033	-1.68417	6.55344	3.15255	1.38565	0.926618	0.993409	0	6	1.37456	1.35124	0.993409	0	6
3.91974	7.90154	-7.68566	4.33887	3.92097	1.31962	8.06813	-3.76478e+07	80804.7	-6.02163e+07	5.63706e+06	-4.5236e+07	-2.60987e+07	3.0619e+06	1.39742	0.940415	0.940415	0	6	0.999501	0.916266	0.916266	0	6		3.97197	7.89119	-7.82874	4.34556	3.90702	1.41889	7.63466	3.28712	5.90003	-7.75314	6.50681	-1.70704	6.69049	2.94217	1.39742	0.940415	0.993409	0	6	1.36039	1.3453	0.993409	0	6
3.27791	8.27589	-7.79351	4.81965	3.9845	1.3453	5.39854	7.67523e+07	1.8381e+08	2.28065e+08	-1.78449e+07	-5.26172e+07	-1.41709e+07	9.83721e+08	1.40725	0.948259	0.948259	0	6	1.45769	0.966143	0.966143	0	6		3.44864	8.6178	-7.33494	4.76709	3.94202	1.45085	6.54855	3.29432	5.86758	-7.51225	6.65597	-1.72322	6.82615	2.73219	1.40725	0.948259	0.993409	0	6	1.34162	1.34133	0.993409	0	6
3.38443	7.33782	-8.45515	4.91908	4.00133	1.61316	2.46912	-2.53231e+08	3.42046e+08	6.98896e+08	3.04062e+08	-5.37753e+07	-2.07845e+08	1.61146e+09	1.41793	0.954328	0.954328	0	6	1.08587	0.992293	0.992293	0	6		3.70141	8.11165	-7.26114	4.79394	3.92361	1.72797	5.55403	3.2999	5.83713	-7.25177	6.79766	-1.73289	6.96015	2.52356	1.41793	0.954328	0.993409	0	6	1.31608	1.33974	0.993409	0	6
3.07473	8.63493	-2.65453	4.32836	3.84805	1.36227	7.61049	-3.05873e+08	-1.14496e+09	-1.14892e+09	3.99864e+08	7.49039e+07	-2.06249e+08	0	1.41794	0.954118	0.954118	0	6	1.45769	0.966143	0.966143	0	6		3.06776	8.32749	-3.39687	4.3886	3.84737	1.5288	5.55865	3.30393	5.80869	-6.97357	6.93182	-1.7363	7.09226	2.3171	1.41794	0.954118	0.993409	0	6	1.27731	1.34047	0.993409	0	6
3.41881	6.81611	-6.35307	4.44687	3.88018	1.53026	4.22925	-6.25926e+08	1.34502e+06	-1.00115e+09	9.37207e+07	-7.52089e+08	-4.33916e+08	5.09069e+07	1.4073	0.947358	0.947358	0	6	0.999501	0.916266	0.916266	0	6		3.60692	7.17174	-5.90008	4.39308	3.8332	1.65854	5.35217	3.30646	5.78227	-6.67949	7.05838	-1.73367	7.22226	2.11358	1.4073	0.947358	0.993409	0	6	1.20857	1.34306	0.993409	0	6
3.04931	9.03125	-2.86521	4.16179	3.78591	1.26716	9.74224	1.27608e+09	3.056e+09	3.79177e+09	-2.96686e+08	-8.74808e+08	-2.35605e+08	1.63552e+10	1.40732	0.947054	0.947054	0	6	1.45769	0.966143	0.966143	0	6		2.92012	8.31561	-4.33869	4.29204	3.81429	1.45344	5.75063	3.30758	5.75787	-6.37138	7.17732	-1.72525	7.34995	1.91366	1.40732	0.947054	0.993409	0	6	1.21858	1.37296	0.993409	0	6
2.76382	9.00012	-2.75138	4.25058	3.89931	1.50584	4.60166	-4.21019e+09	5.68681e+09	1.16197e+10	5.05529e+09	-8.94063e+08	-3.4556e+09	2.67919e+10	1.40448	0.945403	0.945403	0	6	1.08587	0.992293	0.992293	0	6		2.94304	9.31009	-2.39091	4.20504	3.85432	1.64488	5.47445	3.30736	5.73548	-6.05104	7.28864	-1.71127	7.47514	1.71794	1.40448	0.945403	0.993409	0	6	1.21864	1.40149	0.993409	0	6
2.02035	8.96395	-1.46131	4.15595	3.95441	1.25727	4.37482	-5.08541e+09	-1.9036e+10	-1.91018e+10	6.64809e+09	1.24534e+09	-3.42907e+09	0	1.40137	0.942904	0.942904	0	6	1.45769	0.966143	0.966143	0	6		2.1995	9.25975	-1.1356	4.11322	3.90932	1.40444	5.15134	3.30587	5.71507	-5.72024	7.39238	-1.69201	7.59767	1.52697	1.40137	0.942904	0.993409	0	6	1.21226	1.41816	0.993409	0	6
1.65688	8.55476	-3.56761	4.44941	4.03166	1.37112	0	-1.04066e+10	2.23639e+07	-1.6645e+10	1.55819e+09	-1.25041e+10	-7.21424e+09	8.46372e+08	1.39801	0.939506	0.939506	0	6	0.999501	0.916266	0.916266	0	6		2.31638	10.44	-0.405404	4.13446	3.87223	1.44924	4.93425	3.30319	5.69663	-5.38071	7.4886	-1.66772	7.71738	1.34122	1.39801	0.939506	0.993409	0	6	1.20015	1.39548	0.993409	0	6
0.871274	8.61422	-1.74634	3.75587	4.0697	1.31197	0	2.12159e+10	5.08086e+10	6.30415e+10	-4.93267e+09	-1.45444e+10	-3.91714e+09	2.7192e+11	1.39825	0.940342	0.940342	0	6	1.45769	0.966143	0.966143	0	6		1.52292	10.4192	1.23619	3.45616	3.91169	1.4231	4.74267	3.29939	5.68012	-5.03411	7.57737	-1.63866	7.83415	1.1611	1.39825	0.940342	0.993409	0	6	1.18232	1.23947	0.993409	0	6
0.666619	8.16027	-1.12844	3.99358	4.10813	1.46204	0	-6.99981e+10	9.45483e+10	1.93188e+11	8.40487e+10	-1.48646e+10	-5.74524e+10	4.45439e+11	1.36861	0.93274	0.93274	0	6	1.08587	0.992293	0.992293	0	6		1.56083	10.8241	3.42558	3.54537	3.89283	1.50613	5.2741	3.29454	5.66549	-4.68205	7.65881	-1.60509	7.94786	0.986981	1.36861	0.93274	0.993409	0	6	1.15874	1.09429	0.993409	0	6
1.15359	7.67714	1.01727	3.67178	4.08888	1.48358	0	-8.45494e+10	-3.16489e+11	-3.17585e+11	1.1053e+11	2.07049e+10	-5.70113e+10	0	1.37365	0.921766	0.921766	0	6	1.45769	0.966143	0.966143	0	6		2.01284	10.2292	5.37469	3.24263	3.88193	1.53052	5.25092	3.28873	5.65271	-4.32609	7.73304	-1.56728	8.0584	0.819174	1.37365	0.921766	0.993409	0	6	1.13022	1.08718	0.993409	0	6
0.873219	8.01276	3.55062	3.20743	4.08183	1.31337	0	-1.73018e+11	3.71821e+08	-2.76738e+11	2.59062e+10	-2.07892e+11	-1.19943e+11	1.40717e+10	1.35778	0.950994	0.950994	0	6	0.999501	0.916266	0.916266	0	6		1.62949	10.2396	7.33782	2.83355	3.89953	1.36592	5.56869	3.28202	5.64172	-3.9677	7.80019	-1.5255	8.16569	0.65795	1.35778	0.950994	0.993409	0	6	1.10106	1.07243	0.993409	0	6
0.945637	6.56447	3.21301	3.02094	4.14461	1.33993	0	3.52732e+11	8.44738e+11	1.04812e+12	-8.201e+10	-2.41814e+11	-6.51259e+10	4.52091e+12	1.33227	0.975814	0.975814	0	6	1.45769	0.966143	0.966143	0	6		1.89628	9.48157	8.26451	2.52761	3.91642	1.33733	5.72203	3.2745	5.63245	-3.60829	7.86044	-1.48002	8.26965	0.503537	1.33227	0.975814	0.993409	0	6	1.08134	1.05596	0.993409	0	6
0.966593	7.44304	5.02704	2.78265	4.17061	1.40405	0	-1.16378e+12	1.57195e+12	3.21193e+12	1.39738e+12	-2.47137e+11	-9.55196e+11	7.40581e+12	1.30949	0.986661	0.986661	0	6	1.08587	0.992293	0.992293	0	6		1.85136	10.1554	9.72189	2.32401	3.95821	1.40305	6.07168	3.26623	5.62486	-3.24922	7.91396	-1.43109	8.37025	0.356121	1.30949	0.986661	0.993409	0	6	1.07101	1.04202	0.993409	0	6
0.929288	7.70027	4.54789	2.53722	4.07974	1.44996	0	-1.40571e+12	-5.26191e+12	-5.28013e+12	1.83766e+12	3.44237e+11	-9.47864e+11	0	1.29237	0.991779	0.991779	0	6	1.45769	0.966143	0.966143	0	6		1.89807	10.6864	9.72877	2.03183	3.84731	1.43952	6.01977	3.25729	5.61888	-2.89174	7.96093	-1.37898	8.46742	0.215851	1.29237	0.991779	0.993409	0	6	1.05971	1.02633	0.993409	0	6
0.900077	8.18513	8.21024	2.10509	3.72723	1.28412	0	-2.87658e+12	6.18185e+09	-4.60101e+12	4.30714e+11	-3.45639e+12	-1.99416e+12	2.33954e+11	1.26284	0.998067	0.998067	0	6	0.999501	0.916266	0.916266	0	6		1.46826	9.80405	10.9223	1.83491	3.58982	1.35515	6.05767	3.24775	5.61444	-2.53706	8.00156	-1.32394	8.56115	0.0828422	1.26284	0.998067	0.993409	0	6	1.04105	1.00844	0.993409	0	6
1.66197	11.0764	13.098	1.60803	3.61606	1.03483	13.2183	5.86448e+12	1.40445e+13	1.74259e+13	-1.36349e+12	-4.02037e+12	-1.08278e+12	7.5164e+13	1.2404	0.999669	0.999669	0	6	1.45769	0.966143	0.966143	0	6		1.38111	9.80751	10.6019	1.83435	3.68012	1.27255	6.50071	3.23768	5.61147	-2.18629	8.03607	-1.26624	8.65141	0	1.2404	0.999669	0.993409	0	6	1.00994	0.98962	0.993409	0	6
1.07345	8.95789	8.64359	1.87463	3.95996	1.41421	3.46779	-1.93488e+13	2.6135e+13	5.34011e+13	2.32327e+13	-4.10886e+12	-1.5881e+13	123128100650423	1.2409	0.999462	0.999462	0	6	1.08587	0.992293	0.992293	0	6		1.40773	9.77596	9.9079	1.74229	3.87801	1.53436	6.73499	1.69245e+06	1.22201e+06	2.24523e+06	412991	-504368	5.25597e+06	0	1.2409	0.999462	0.993409	0	6	0.995207	0.979655	0.979655	0	6
0.0438287	7.49483	6.11826	1.79494	3.99607	1.31332	0	-2.33711e+13	-87483934581690	-8.77867e+13	3.05528e+13	5.72324e+12	-1.57591e+13	0	1.22901	0.997566	0.997566	0	6	1.45769	0.966143	0.966143	0	6		0.755911	9.63454	9.79072	1.43446	3.82476	1.33822	7.11828	833104	1.559e+06	4.73356e+06	-532912	-1.19041e+06	4.89839e+06	0	1.22901	0.997566	0.993409	0	6	0.999501	0.977946	0.977946	0	6
-3.50829	-6.45825	-18.3988	3.90701	4.88601	2.04931	0	-4.78257e+13	1.02779e+11	-7.64959e+13	7.161e+12	-5.74655e+13	-3.31546e+13	3.88969e+12	1.18765	0.990264	0.990264	0	6	0.999501	0.916266	0.916266	0	6		1.12276	9.00788	9.30808	1.25575	3.78464	1.30845	7.28967	766356	1.0257e+06	4.06077e+06	-523975	-1.17747e+06	4.84686e+06	807431	1.18765	0.990264	0.993409	0	6	3.54955	2.02749	0.993409	0	6
3.083	11.1313	14.5805	0.945163	3.47675	0.980017	25.0336	97502174951477	233502297417270	289720936748105	-2.26692e+13	-6.68422e+13	-1.80021e+13	1249667443517710	1.15651	0.98486	0.98486	0	6	1.45769	0.966143	0.966143	0	6		2.17065	7.74453	8.28386	1.53467	3.69094	1.32353	8.23287	721563	614172	3.41341e+06	-493233	-1.16335e+06	4.78321e+06	1.66267e+06	1.15651	0.98486	0.993409	0	6	1.08587	1.21398	0.993409	0	6
3.29882	13.2449	17.2661	0.58704	3.28436	0.854925	35.5241	-321691541221075	434517295943377	887840130019839	386264150099693	-68313413063596	-264035009823743	2047112397200070	1.20351	0.992903	0.992903	0	6	1.08587	0.992293	0.992293	0	6		1.77632	7.79835	7.2643	1.53024	3.64347	1.30876	8.8886	692688	299662	2.7621e+06	-440452	-1.14852e+06	4.71094e+06	2.49903e+06	1.20351	0.992903	0.993409	0	6	1.08587	1.21398	0.993409	0	6
3.80496	15.0883	18.3297	0.11686	3.26216	0.797707	42.8138	-388565301783620	-1454496951478720	-1459530910793770	507966680415075	9.51539e+13	-262008159648028	0	1.20402	0.992952	0.992952	0	6	1.45769	0.966143	0.966143	0	6		1.83154	8.16275	5.69615	1.31282	3.72875	1.3076	9.2058	675227	61650	2.09368e+06	-366538	-1.1332e+06	4.63341e+06	3.27143e+06	1.20402	0.992952	0.993409	0	6	1.08587	1.21398	0.993409	0	6
-12.3659	-42.177	-84.059	9.8703	7.01641	4.12426	0	-795143982174393	1.70879e+12	-1271811023934180	119057839783386	-955414044875241	-551224307851559	6.46695e+13	1.17434	0.987843	0.987843	0	6	0.999501	0.916266	0.916266	0	6		2.12569	7.1891	5.0381	1.38319	3.57779	1.24733	8.93916	665837	-116721	1.40603e+06	-273185	-1.11735e+06	4.5537e+06	3.95142e+06	1.17434	0.987843	0.993409	0	6	1.08587	1.21398	0.993409	0	6
10.5477	38.1906	58.7787	-3.92496	1.66574	-0.609035	151.06	1621058962520680	3882179984044120	4816864048189060	-376894849000453	-1111310223093840	-299300407307320	2.07768e+16	1.19008	0.990781	0.990781	0	6	1.45769	0.966143	0.966143	0	6		1.8741	8.47735	5.04733	1.18869	3.72233	1.21481	8.31064	662045	-249170	704052	-162593	-1.10083e+06	4.47451e+06	4.52313e+06	1.19008	0.990781	0.993409	0	6	1.08587	1.21398	0.993409	0	6
-0.543734	-0.278036	-9.72234	2.66284	4.41101	1.56664	0	-5348403318407930	7224230201111250	1.47611e+16	6421979435128350	-1135770259096640	-4389813040649430	3.4035e+16	1.15868	0.985486	0.985486	0	6	1.08587	0.992293	0.992293	0	6		1.82716	7.72827	4.67894	1.28786	3.8479	1.13454	7.39257	662029	-346755	-3231.48	-37249.8	-1.08335e+06	4.39808e+06	4.98003e+06	1.15868	0.985486	0.993409	0	6	1.08587	1.21398	0.993409	0	6
0.783423	3.77755	-5.24381	2.02834	3.98389	1.35835	0	-6460238095131840	-2.41823e+16	-2.4266e+16	8445390478288880	1582016228735800	-4356114883202030	0	1.17422	0.988967	0.988967	0	6	1.45769	0.966143	0.966143	0	6		2.05263	7.96728	2.22632	1.31102	3.6817	1.18138	6.73485	664451	-418285	-704800	100229	-1.06461e+06	4.32621e+06	5.32231e+06	1.17422	0.988967	0.993409	0	6	1.08587	1.21398	0.993409	0	6
-14.3672	-43.7264	-94.0734	10.3887	7.37755	4.30866	0	-1.322e+16	2.84101e+13	-2.1145e+16	1979440749244270	-1.58846e+16	-9164586380210670	1075186200093740	1.17469	0.989094	0.989094	0	6	0.999501	0.916266	0.916266	0	6		1.27728	9.55939	2.05423	1.22165	3.6661	1.17098	6.65371	668327	-470702	-1.38913e+06	247223	-1.04424e+06	4.26028e+06	5.55484e+06	1.17469	0.989094	0.993409	0	6	1.45769	1.44317	0.993409	0	6
-0.194299	1.2866	-11.3942	2.48035	4.25461	1.48039	0	2.69515e+16	6.45446e+16	8.00846e+16	-6266206607219940	-1.84765e+16	-4976131127258020	3.45433e+17	1.15928	0.986091	0.986091	0	6	1.45769	0.966143	0.966143	0	6		1.98337	8.50416	1.49486	1.24397	3.73632	1.1604	6.13248	672930	-509393	-2.0452e+06	401192	-1.02187e+06	4.20125e+06	5.68557e+06	1.15928	0.986091	0.993409	0	6	1.45769	1.44317	0.993409	0	6
-0.158042	0.505604	-12.4679	2.59752	4.41729	1.54508	0	-8.89219e+16	1.20109e+17	2.45417e+17	1.06771e+17	-1.88832e+16	-7.29845e+16	5.65862e+17	1.15996	0.986149	0.986149	0	6	1.08587	0.992293	0.992293	0	6		2.06154	7.93728	0.854887	1.32251	3.88964	1.17544	6.60769	677726	-538476	-2.66313e+06	559740	-997161	4.14972e+06	5.72432e+06	1.15996	0.986149	0.993409	0	6	1.45769	1.44317	0.993409	0	6
-2.4764	-9.30098	-31.8451	4.3178	5.07582	2.17464	0	-1.07407e+17	-4.02052e+17	-4.03443e+17	1.40412e+17	2.63024e+16	-7.24242e+16	0	1.17613	0.989474	0.989474	0	6	1.45769	0.966143	0.966143	0	6		2.83753	8.72899	0.634276	1.21766	3.81462	1.14852	6.56652	682316	-561041	-3.23456e+06	720648	-969772	4.10601e+06	5.68182e+06	1.17613	0.989474	0.993409	0	6	1.45769	1.44317	0.993409	0	6
-0.164499	-0.145209	-13.425	2.73857	4.36602	1.48868	0	-2.19793e+17	472342059478219	-3.51554e+17	3.29099e+16	-2.64095e+17	-1.52369e+17	1.78759e+16	1.15975	0.986762	0.986762	0	6	0.999501	0.916266	0.916266	0	6		2.11835	7.53327	0.361137	1.41987	3.82367	1.08567	6.16225	686401	-579348	-3.75279e+06	881899	-939414	4.07015e+06	5.56911e+06	1.15975	0.986762	0.993409	0	6	1.45769	1.44317	0.993409	0	6
4.86572	19.1411	18.4537	-0.390168	3.09646	0.462185	57.21	4.48093e+17	1.07311e+18	1.33148e+18	-1.04181e+17	-3.07188e+17	-8.27325e+16	5.74312e+18	1.19069	0.994303	0.994303	0	6	1.45769	0.966143	0.966143	0	6		1.81851	8.55848	-0.766511	1.43663	3.81756	1.19726	6.08696	689753	-595003	-4.21284e+06	1.04169e+06	-905837	4.04195e+06	5.39698e+06	1.19069	0.994303	0.993409	0	6	1.45769	1.44317	0.993409	0	6
5.003	19.062	17.3904	-0.554509	3.1517	0.460945	53.5512	-1.4784e+18	1.99692e+18	4.08026e+18	1.77516e+18	-3.13949e+17	-1.21343e+18	9.40795e+18	1.19228	0.993535	0.993535	0	6	1.08587	0.992293	0.992293	0	6		2.17501	9.21903	-0.503035	1.14474	3.82081	1.15333	5.95571	692199	-609101	-4.61137e+06	1.19844e+06	-868836	4.02106e+06	5.17569e+06	1.19228	0.993535	0.993409	0	6	1.45769	1.44317	0.993409	0	6
1.27432	7.23499	-4.70934	1.61377	4.0723	1.3204	0	-1.78574e+18	-6.68446e+18	-6.70759e+18	2.33447e+18	4.373e+17	-1.20412e+18	0	1.14469	0.983994	0.983994	0	6	1.45769	0.966143	0.966143	0	6		2.12266	9.94912	0.0701782	1.1513	3.8696	1.25158	5.87392	693608	-622340	-4.94652e+06	1.35075e+06	-828250	4.00701e+06	4.91477e+06	1.14469	0.983994	0.993409	0	6	1.45769	1.44317	0.993409	0	6
1.78299	6.93075	-2.93173	1.42367	3.77754	1.16436	0	-3.65426e+18	7853099987494310	-5.84489e+18	5.47156e+17	-4.39082e+18	-2.53327e+18	2.97203e+17	1.1453	0.984086	0.984086	0	6	0.999501	0.916266	0.916266	0	6		2.29468	8.46276	-0.307968	1.16551	3.65442	1.18398	5.59941	693875	-635125	-5.2178e+06	1.49745e+06	-783970	3.99921e+06	4.62286e+06	1.1453	0.984086	0.993409	0	6	1.45769	1.44317	0.993409	0	6
-0.0853226	-0.728805	-14.8319	2.45569	4.34918	1.59185	0	7.44993e+18	1.78414e+19	2.2137e+19	-1.7321e+18	-5.10727e+18	-1.3755e+18	9.54844e+19	1.14606	0.984149	0.984149	0	6	1.45769	0.966143	0.966143	0	6		2.35824	7.45954	-0.150682	1.05034	3.76836	1.17858	6.24522	692926	-647641	-5.42587e+06	1.63753e+06	-735928	3.997e+06	4.3077e+06	1.14606	0.984149	0.993409	0	6	1.45769	1.44317	0.993409	0	6
1.18791	4.09692	-7.14483	1.81568	4.29148	1.43824	0	-2.45798e+19	3.32005e+19	6.7838e+19	2.95136e+19	-5.21968e+18	-2.01743e+19	1.56415e+20	1.13073	0.981176	0.981176	0	6	1.08587	0.992293	0.992293	0	6		2.54492	8.59783	0.894163	1.04455	3.96851	1.23607	6.75395	690702	-659918	-5.57236e+06	1.77018e+06	-684105	3.99971e+06	3.97609e+06	1.13073	0.981176	0.993409	0	6	1.45769	1.44317	0.993409	0	6
2.0706	6.96499	0.306125	0.870204	4.02035	1.18945	3.39368	-2.96894e+19	-1.11135e+20	-1.1152e+20	3.88126e+19	7.2705e+18	-2.00195e+19	0	1.13177	0.981222	0.981222	0	6	1.45769	0.966143	0.966143	0	6		2.32201	7.67505	1.49032	0.751862	3.95949	1.22413	6.49817	687166	-671879	-5.65968e+06	1.89473e+06	-628520	4.00664e+06	3.63395e+06	1.13177	0.981222	0.993409	0	6	1.45769	1.44317	0.993409	0	6
2.78385	6.12202	-0.157921	1.3187	3.93718	1.0698	4.63577	-6.07552e+19	1.30565e+17	-9.71764e+19	9.09695e+18	-7.30011e+19	-4.21179e+19	4.94125e+18	1.09524	0.972682	0.972682	0	6	0.999501	0.916266	0.916266	0	6		2.95676	6.62277	0.687452	1.23505	3.89537	1.08672	6.85581	682296	-683382	-5.69089e+06	2.01064e+06	-569232	4.01706e+06	3.28636e+06	1.09524	0.972682	0.993409	0	6	1.45769	1.44317	0.993409	0	6
0.553781	-2.12663	-15.572	2.7111	4.4467	1.65611	0	1.23862e+20	2.96629e+20	3.68046e+20	-2.87977e+19	-8.49128e+19	-2.28689e+19	1.58751e+21	1.16435	0.987827	0.987827	0	6	1.45769	0.966143	0.966143	0	6		3.09607	6.50907	-0.0111945	1.22567	3.84343	1.15748	6.87834	676082	-694247	-5.6695e+06	2.11752e+06	-506334	4.03029e+06	2.93762e+06	1.16435	0.987827	0.993409	0	6	1.45769	1.44317	0.993409	0	6
-1.4419	-7.93415	-25.7395	3.61437	4.84302	2.20317	0	-4.0866e+20	5.51988e+20	1.12787e+21	4.9069e+20	-8.67818e+19	-3.35416e+20	2.60054e+21	1.16345	0.988455	0.988455	0	6	1.08587	0.992293	0.992293	0	6		2.80282	6.55384	0.408419	1.1198	3.83643	1.32615	6.68001	668531	-704277	-5.59936e+06	2.21507e+06	-439952	4.04567e+06	2.59133e+06	1.16345	0.988455	0.993409	0	6	1.45769	1.44317	0.993409	0	6
-0.232195	-2.48659	-14.6919	2.67473	4.56092	1.67645	0	-4.93613e+20	-1.84772e+21	-1.85411e+21	6.45294e+20	1.20878e+20	-3.32841e+20	0	1.14435	0.98579	0.98579	0	6	1.45769	0.966143	0.966143	0	6		2.228	5.88652	0.3998	1.23305	3.97737	1.17822	6.33138	659660	-713279	-5.48456e+06	2.30312e+06	-370238	4.06256e+06	2.25049e+06	1.14435	0.98579	0.993409	0	6	1.45769	1.44317	0.993409	0	6
1.54512	1.46046	-8.74582	2.0759	4.30794	1.34177	0	-1.01011e+21	2.17075e+18	-1.61564e+21	1.51245e+20	-1.21371e+21	-7.00246e+20	8.21527e+19	1.16106	0.990221	0.990221	0	6	0.999501	0.916266	0.916266	0	6		2.97565	6.30125	-0.0402592	1.24292	3.96844	1.06734	6.29978	649497	-721070	-5.32928e+06	2.38157e+06	-297371	4.08037e+06	1.91751e+06	1.16106	0.990221	0.993409	0	6	1.45769	1.44317	0.993409	0	6
1.35507	1.08008	-7.65392	1.89419	4.34281	1.36295	0	2.05931e+21	4.93172e+21	6.11909e+21	-4.78787e+20	-1.41175e+21	-3.80216e+20	2.63938e+22	1.16277	0.990289	0.990289	0	6	1.45769	0.966143	0.966143	0	6		2.81256	6.03957	1.28396	1.04016	3.99712	1.06783	6.23847	638083	-727488	-5.13775e+06	2.45038e+06	-221549	4.09854e+06	1.59437e+06	1.16277	0.990289	0.993409	0	6	1.45769	1.44317	0.993409	0	6
2.80077	3.85269	-1.80001	1.18689	4.11474	1.12173	0	-6.79433e+21	9.17728e+21	1.87518e+22	8.15815e+21	-1.44282e+21	-5.57659e+21	4.32363e+22	1.12716	0.983351	0.983351	0	6	1.08587	0.992293	0.992293	0	6		3.22901	5.31594	0.840258	0.934687	4.01322	1.0309	6.12719	625466	-732394	-4.91417e+06	2.50962e+06	-142988	4.11657e+06	1.2826e+06	1.12716	0.983351	0.993409	0	6	1.45769	1.44317	0.993409	0	6
2.27687	4.71395	-2.3042	1.31669	4.12521	1.21265	0	-8.20675e+21	-3.07199e+22	-3.08262e+22	1.07286e+22	2.00971e+21	-5.53378e+21	0	1.10872	0.979845	0.979845	0	6	1.45769	0.966143	0.966143	0	6		2.75679	6.3869	0.735031	1.0274	4.01171	1.09073	6.18357	611703	-735678	-4.66265e+06	2.55938e+06	-61920.3	4.134e+06	983392	1.10872	0.979845	0.993409	0	6	1.45769	1.44317	0.993409	0	6
2.38704	4.66549	-1.65732	1.34411	4.16436	1.15775	0	-1.67939e+22	3.60906e+19	-2.68615e+22	2.51458e+21	-2.0179e+22	-1.16422e+22	1.36586e+21	1.11618	0.984647	0.984647	0	6	0.999501	0.916266	0.916266	0	6		2.89162	6.36495	1.3903	1.05143	4.04459	1.06277	5.48802	596861	-737257	-4.38716e+06	2.59982e+06	21410.9	4.15042e+06	697651	1.11618	0.984647	0.993409	0	6	1.45769	1.44317	0.993409	0	6
2.62458	4.66213	-0.180371	1.11852	4.16531	1.14725	1.16599	3.42378e+22	8.19941e+22	1.01735e+23	-7.96026e+21	-2.34716e+22	-6.32142e+21	4.3882e+23	1.11561	0.984885	0.984885	0	6	1.45769	0.966143	0.966143	0	6		2.9053	5.56858	1.41864	0.963391	4.09836	1.11695	5.40506	581009	-737074	-4.09154e+06	2.63114e+06	106753	4.16546e+06	426021	1.11561	0.984885	0.993409	0	6	1.45769	1.44317	0.993409	0	6
2.45544	5.63249	-0.331082	0.815209	4.27163	1.51875	2.21831	-1.12962e+23	1.5258e+23	3.11764e+23	1.35636e+23	-2.39882e+22	-9.27157e+22	7.18842e+23	1.10775	0.980297	0.980297	0	6	1.08587	0.992293	0.992293	0	6		2.7165	6.43658	1.06035	0.678733	4.20902	1.51361	5.89487	564225	-735099	-3.7794e+06	2.65359e+06	193847	4.17881e+06	168942	1.10775	0.980297	0.993409	0	6	1.45769	1.44317	0.993409	0	6
2.35682	3.20552	-0.480617	0.758065	4.31201	1.21957	3.40889	-1.36444e+23	-5.10745e+23	-5.12513e+23	1.78372e+23	3.34132e+22	-9.20039e+22	0	1.08935	0.970681	0.970681	0	6	1.45769	0.966143	0.966143	0	6		2.54016	3.8355	0.658794	0.649783	4.26846	1.17959	6.43695	546591	-731325	-3.45419e+06	2.66742e+06	282428	4.19017e+06	0	1.08935	0.970681	0.993409	0	6	1.45769	1.44317	0.993409	0	6
2.3516	6.06309	1.97128	0.72075	4.02652	1.05851	4.30959	-2.79214e+23	6.00039e+20	-4.46595e+23	4.18071e+22	-3.35493e+23	-1.93562e+23	2.27086e+22	1.08829	0.970331	0.970331	0	6	0.999501	0.916266	0.916266	0	6		2.48156	6.59404	2.9866	0.627235	3.99635	0.980904	7.03177	-987427	5.55754e+06	2.65041e+06	-179175	-5.21444e+06	5.01247e+06	0	1.08829	0.970331	0.993409	0	6	0.999501	0.977946	0.977946	0	6
1.92812	6.1269	2.43088	0.765127	4.11234	1.03823	3.28784	5.69233e+23	1.36322e+24	1.69144e+24	-1.32346e+23	-3.90236e+23	-1.05099e+23	7.29576e+24	1.08738	0.970084	0.970084	0	6	1.45769	0.966143	0.966143	0	6		2.09129	6.65445	3.36172	0.675218	4.07331	1.02136	5.75377	-825832	4.23065e+06	2.79599e+06	-226788	-5.15288e+06	5.17688e+06	0	1.08738	0.970084	0.993409	0	6	3.54955	2.02749	0.993409	0	6
1.84403	7.22942	4.18832	0.361692	4.2535	1.28533	6.60194	-1.87809e+24	2.53678e+24	5.18335e+24	2.25507e+24	-3.98825e+23	-1.54148e+24	1.19514e+25	1.08782	0.970335	0.970335	0	6	1.08587	0.992293	0.992293	0	6		1.81234	7.0515	3.82115	0.394102	4.26045	1.33246	5.60691	-658115	3.15512e+06	2.98705e+06	-259781	-5.08718e+06	5.29016e+06	291022	1.08782	0.970335	0.993409	0	6	3.54955	2.02749	0.993409	0	6
2.06085	6.82391	4.8127	0.349147	4.2501	1.23692	7.54024	-2.26851e+24	-8.49159e+24	-8.52098e+24	2.96559e+24	5.55524e+23	-1.52965e+24	0	1.07754	0.962789	0.962789	0	6	1.45769	0.966143	0.966143	0	6		1.99482	6.49572	4.15323	0.407711	4.26511	1.30915	5.76156	-491446	2.28603e+06	3.15351e+06	-274646	-5.01902e+06	5.35934e+06	980855	1.07754	0.962789	0.993409	0	6	1.08587	1.21398	0.993409	0	6
2.26209	7.80303	6.16759	0.204612	4.30766	1.08426	8.78665	-4.64218e+24	9.97617e+21	-7.42504e+24	6.95079e+23	-5.57786e+24	-3.21814e+24	3.77551e+23	1.07667	0.963395	0.963395	0	6	0.999501	0.916266	0.916266	0	6		2.13123	7.31233	5.2532	0.288638	4.33884	1.1339	6.35098	-330697	1.58894e+06	3.22456e+06	-265222	-4.94985e+06	5.39045e+06	1.903e+06	1.07667	0.963395	0.993409	0	6	1.08587	1.21398	0.993409	0	6
2.18961	8.26425	7.10131	0.0384302	4.16485	0.917659	10.717	9.464e+24	2.26648e+25	2.81216e+25	-2.20037e+24	-6.48801e+24	-1.74736e+24	1.21298e+26	1.07391	0.961024	0.961024	0	6	1.45769	0.966143	0.966143	0	6		1.93648	7.31083	5.32415	0.198457	4.2262	1.00916	5.9957	-178955	1.03385e+06	3.16276e+06	-228176	-4.88059e+06	5.38995e+06	2.93203e+06	1.07391	0.961024	0.993409	0	6	1.08587	1.21398	0.993409	0	6
1.94839	8.56333	7.57305	-0.00126542	4.14075	1.04935	9.42361	-3.12248e+25	4.21762e+25	8.61778e+25	3.74925e+25	-6.63081e+24	-2.56284e+25	1.98702e+26	1.07185	0.95883	0.95883	0	6	1.08587	0.992293	0.992293	0	6		1.78045	7.86718	6.24136	0.113358	4.18227	1.13796	5.88496	-38005.2	594871	2.95471e+06	-162342	-4.81174e+06	5.36433e+06	3.97588e+06	1.07185	0.95883	0.993409	0	6	1.08587	1.21398	0.993409	0	6
1.7796	5.6061	7.37373	-0.0656841	4.24033	0.963542	9.20619	-3.77159e+25	-1.4118e+26	-1.41669e+26	4.93055e+25	9.23607e+24	-2.54317e+25	0	1.06881	0.957136	0.957136	0	6	1.45769	0.966143	0.966143	0	6		1.64783	4.96942	6.10488	0.0372383	4.2737	1.07599	5.83	91300.3	249918	2.60368e+06	-68165.3	-4.74346e+06	5.31973e+06	4.96925e+06	1.06881	0.957136	0.993409	0	6	1.08587	1.21398	0.993409	0	6
2.80643	7.18203	8.27305	0.061191	4.20211	1.21139	8.89468	-7.71803e+25	1.65862e+23	-1.23448e+26	1.15563e+25	-9.27368e+25	-5.35043e+25	6.27711e+24	1.06425	0.95572	0.95572	0	6	0.999501	0.916266	0.916266	0	6		2.74049	6.87731	7.65974	0.0993351	4.22221	1.2412	7.31097	208758	-19668.5	2.12398e+06	52738.2	-4.67564e+06	5.2618e+06	5.86804e+06	1.06425	0.95572	0.993409	0	6	1.08587	1.21398	0.993409	0	6
2.3643	7.85294	8.64599	-0.169604	4.25242	0.881554	9.10583	1.57347e+26	3.76822e+26	4.67547e+26	-3.65831e+25	-1.07869e+26	-2.90515e+25	2.01669e+27	1.06711	0.95761	0.95761	0	6	1.45769	0.966143	0.966143	0	6		2.2428	7.3898	7.76891	-0.100487	4.28453	0.913313	6.8111	314599	-229488	1.53657e+06	197948	-4.60799e+06	5.19553e+06	6.64469e+06	1.06711	0.95761	0.993409	0	6	1.45769	1.44317	0.993409	0	6
2.52708	6.41791	8.43202	-0.234197	4.29537	1.02087	9.51789	-5.1914e+26	7.01217e+26	1.43278e+27	6.23346e+26	-1.10243e+26	-4.26095e+26	3.30359e+27	1.06439	0.954572	0.954572	0	6	1.08587	0.992293	0.992293	0	6		2.4447	5.79339	7.10003	-0.172449	4.32948	1.1243	6.10888	409329	-392445	865893	364525	-4.54011e+06	5.12521e+06	7.28432e+06	1.06439	0.954572	0.993409	0	6	1.45769	1.44317	0.993409	0	6
2.80198	9.69546	8.26306	-0.186027	4.30324	0.935437	8.14961	-6.2706e+26	-2.34724e+27	-2.35537e+27	8.19748e+26	1.53558e+26	-4.22824e+26	0	1.06135	0.954109	0.954109	0	6	1.45769	0.966143	0.966143	0	6		2.80999	9.47708	7.71741	-0.189992	4.31453	0.979077	6.82984	493612	-519098	137441	549235	-4.47148e+06	5.05441e+06	7.78155e+06	1.06135	0.954109	0.993409	0	6	1.45769	1.44317	0.993409	0	6
2.44258	7.95876	8.40277	-0.174496	4.17014	0.742343	10.4644	-1.28319e+27	2.75761e+24	-2.05243e+27	1.92133e+26	-1.54183e+27	-8.89556e+26	1.04362e+26	1.06105	0.95409	0.95409	0	6	0.999501	0.916266	0.916266	0	6		2.43541	7.13867	6.41069	-0.149766	4.20867	0.931251	5.51751	568187	-617984	-623867	748724	-4.40158e+06	4.98604e+06	8.13796e+06	1.06105	0.95409	0.993409	0	6	1.45769	1.44317	0.993409	0	6
1.99469	8.52986	7.6537	-0.175731	4.15991	0.85543	8.45887	2.61604e+27	6.265e+27	7.77337e+27	-6.08226e+26	-1.79341e+27	-4.83006e+26	3.35293e+28	1.06297	0.954184	0.954184	0	6	1.45769	0.966143	0.966143	0	6		1.98924	8.12465	6.70949	-0.161979	4.17913	0.940844	6.11512	633811	-695921	-1.39483e+06	959648	-4.32983e+06	4.92236e+06	8.36001e+06	1.06297	0.954184	0.993409	0	6	1.45769	1.44317	0.993409	0	6
2.02954	7.70382	7.58068	-0.471821	4.2784	0.930717	8.73197	-8.63116e+27	1.16583e+28	2.38212e+28	1.03637e+28	-1.83289e+27	-7.0842e+27	5.49252e+28	1.06314	0.95419	0.95419	0	6	1.08587	0.992293	0.992293	0	6		2.00396	7.18674	6.4039	-0.43446	4.30101	1.05231	5.74487	691222	-758275	-2.15465e+06	1.17876e+06	-4.2557e+06	4.86503e+06	8.45742e+06	1.06314	0.95419	0.993409	0	6	1.45769	1.44317	0.993409	0	6
1.60209	8.06333	6.57718	-0.124122	4.13356	0.813408	8.18899	-1.04254e+28	-3.9025e+28	-3.916e+28	1.3629e+28	2.55303e+27	-7.02982e+27	0	1.05272	0.95778	0.95778	0	6	1.45769	0.966143	0.966143	0	6		1.82497	7.93324	5.75616	-0.242822	4.12524	0.958445	6.44068	741113	-809204	-2.88533e+06	1.403e+06	-4.17869e+06	4.81522e+06	8.44194e+06	1.05272	0.95778	0.993409	0	6	1.45769	1.44317	0.993409	0	6
2.12225	8.18748	6.40443	-0.421754	4.23873	0.99061	8.98129	-2.13342e+28	4.58477e+25	-3.41234e+28	3.19439e+27	-2.56343e+28	-1.47897e+28	1.73512e+27	1.05743	0.954174	0.954174	0	6	0.999501	0.916266	0.916266	0	6		2.15146	7.78639	5.31702	-0.417706	4.25212	1.12811	6.27656	784121	-851868	-3.57184e+06	1.62952e+06	-4.09832e+06	4.77364e+06	8.32634e+06	1.05743	0.954174	0.993409	0	6	1.45769	1.44317	0.993409	0	6
1.60817	7.94869	6.07898	-0.214446	4.19965	0.750639	9.66958	4.34939e+28	1.04161e+29	1.29239e+29	-1.01123e+28	-2.98171e+28	-8.03039e+27	5.57453e+29	1.04978	0.956661	0.956661	0	6	1.45769	0.966143	0.966143	0	6		1.96734	7.84734	4.72455	-0.419071	4.18283	1.00421	6.7709	820823	-888617	-4.20206e+06	1.85569e+06	-4.01418e+06	4.74063e+06	8.12372e+06	1.04978	0.956661	0.993409	0	6	1.45769	1.44317	0.993409	0	6
1.50533	7.46989	5.89851	0.0416087	4.21288	0.709628	10.3918	-1.43501e+29	1.9383e+29	3.96049e+29	1.72305e+29	-3.04733e+28	-1.17781e+29	9.13179e+29	1.05017	0.956311	0.956311	0	6	1.08587	0.992293	0.992293	0	6		1.93528	7.39487	4.28366	-0.209597	4.19158	1.01611	6.94195	851733	-921147	-4.7667e+06	2.07917e+06	-3.92592e+06	4.7162e+06	7.84698e+06	1.05017	0.956311	0.993409	0	6	1.45769	1.44317	0.993409	0	6
1.9927	8.1186	4.74682	-0.410159	4.20813	1.00744	9.66264	-1.73332e+29	-6.48824e+29	-6.5107e+29	2.26594e+29	4.24464e+28	-1.16877e+29	0	1.05544	0.953779	0.953779	0	6	1.45769	0.966143	0.966143	0	6		2.00762	7.78388	3.76894	-0.406123	4.2208	1.12873	7.22303	877306	-950639	-5.25901e+06	2.29787e+06	-3.83327e+06	4.70011e+06	7.50846e+06	1.05544	0.953779	0.993409	0	6	1.45769	1.44317	0.993409	0	6
1.34651	8.77649	4.32007	-0.164389	4.17811	0.709019	10.6557	-3.54699e+29	7.62257e+26	-5.67331e+29	5.31095e+28	-4.26192e+29	-2.45891e+29	2.88478e+28	1.0508	0.955757	0.955757	0	6	0.999501	0.916266	0.916266	0	6		1.73808	8.74639	2.78468	-0.400083	4.15789	1.00272	7.35289	897945	-977870	-5.67461e+06	2.50996e+06	-3.736e+06	4.69193e+06	7.11969e+06	1.0508	0.955757	0.993409	0	6	1.45769	1.44317	0.993409	0	6
0.884842	8.92744	4.34305	-0.17752	4.23817	0.70805	11.5278	7.23124e+29	1.73177e+30	2.14871e+30	-1.68126e+29	-4.95735e+29	-1.33512e+29	9.26815e+30	1.05102	0.955581	0.955581	0	6	1.45769	0.966143	0.966143	0	6		1.38988	8.87493	2.27584	-0.482218	4.21274	1.0999	7.04831	914006	-1.00331e+06	-6.01117e+06	2.71383e+06	-3.63397e+06	4.69107e+06	6.69126e+06	1.05102	0.955581	0.993409	0	6	1.45769	1.44317	0.993409	0	6
0.609495	8.42678	4.61406	0.0612059	4.33619	0.639936	12.1218	-2.38582e+30	3.22259e+30	6.58466e+30	2.86473e+30	-5.06646e+29	-1.95821e+30	1.51824e+31	1.04898	0.957062	0.957062	0	6	1.08587	0.992293	0.992293	0	6		1.47025	8.70592	2.12193	-0.462406	4.27489	1.20287	7.04209	925803	-1.0272e+06	-6.26811e+06	2.90814e+06	-3.52707e+06	4.69683e+06	6.23272e+06	1.04898	0.957062	0.993409	0	6	1.45769	1.44317	0.993409	0	6
0.758288	7.77456	4.87525	0.164211	4.29748	0.543115	12.5146	-2.88179e+30	-1.07873e+31	-1.08246e+31	3.76733e+30	7.05708e+29	-1.94318e+30	0	1.04932	0.956659	0.956659	0	6	1.45769	0.966143	0.966143	0	6		1.6008	8.11364	2.3912	-0.356485	4.23527	1.11179	7.42572	933619	-1.0496e+06	-6.44634e+06	3.09176e+06	-3.4153e+06	4.70841e+06	5.75261e+06	1.04932	0.956659	0.993409	0	6	1.45769	1.44317	0.993409	0	6
0.910331	8.12784	3.36817	-0.349678	4.07411	0.749196	11.9496	-5.89718e+30	1.26732e+28	-9.43238e+30	8.82992e+29	-7.08582e+30	-4.08815e+30	4.79621e+29	1.05178	0.954933	0.954933	0	6	0.999501	0.916266	0.916266	0	6		1.25616	8.02743	1.56913	-0.557144	4.0585	1.0821	7.89767	937707	-1.07049e+06	-6.54803e+06	3.26374e+06	-3.29867e+06	4.72501e+06	5.25843e+06	1.05178	0.954933	0.993409	0	6	1.45769	1.44317	0.993409	0	6
-0.0264376	5.99096	4.48635	0.121918	4.21288	0.233229	13.8233	1.20226e+31	2.87922e+31	3.57242e+31	-2.79524e+30	-8.24202e+30	-2.21976e+30	1.54091e+32	1.0478	0.959965	0.959965	0	6	1.45769	0.966143	0.966143	0	6		1.33294	7.0365	1.52757	-0.746073	4.09319	1.04224	8.24815	938300	-1.08975e+06	-6.57633e+06	3.42335e+06	-3.17728e+06	4.74578e+06	4.75672e+06	1.0478	0.959965	0.993409	0	6	1.45769	1.44317	0.993409	0	6
-5.01431	1.26632	10.569	3.77099	4.86286	-2.24354	23.111	-3.96664e+31	5.35785e+31	1.09476e+32	4.76286e+31	-8.42343e+30	-3.2557e+31	2.52421e+32	1.0448	0.97232	0.97232	0	6	1.08587	0.992293	0.992293	0	6		1.57313	8.4571	1.35797	-0.566961	4.20846	1.04185	9.11052	935612	-1.10722e+06	-6.53515e+06	3.56999e+06	-3.05124e+06	4.76986e+06	4.25309e+06	1.0448	0.97232	0.993409	0	6	1.45769	1.44317	0.993409	0	6
-0.110737	5.89425	4.4909	0.725243	4.1455	0.0524193	15.6471	-4.79123e+31	-1.79348e+32	-1.79968e+32	6.26352e+31	1.1733e+31	-3.23071e+31	0	1.04814	0.95979	0.95979	0	6	1.45769	0.966143	0.966143	0	6		1.83024	7.62085	0.582521	-0.5427	3.96942	1.16498	8.52354	929846	-1.12272e+06	-6.42901e+06	3.70326e+06	-2.92075e+06	4.79645e+06	3.75236e+06	1.04814	0.95979	0.993409	0	6	1.45769	1.44317	0.993409	0	6
0.521075	6.10112	3.34164	0.458764	4.20622	0.417536	13.7907	-9.80458e+31	2.10703e+29	-1.56822e+32	1.46805e+31	-1.17808e+32	-6.79691e+31	7.97411e+30	1.04827	0.958988	0.958988	0	6	0.999501	0.916266	0.916266	0	6		1.91475	7.36425	0.607008	-0.455844	4.07992	1.2005	8.87076	921192	-1.13607e+06	-6.26282e+06	3.82285e+06	-2.78602e+06	4.82473e+06	3.25856e+06	1.04827	0.958988	0.993409	0	6	1.45769	1.44317	0.993409	0	6
1.49415	6.86087	1.26632	-0.199324	3.9045	0.826546	11.8287	1.99886e+32	4.78695e+32	5.93947e+32	-4.64733e+31	-1.37031e+32	-3.69054e+31	2.5619e+33	1.05038	0.955765	0.955765	0	6	1.45769	0.966143	0.966143	0	6		2.03813	7.18235	-0.277345	-0.553789	3.86341	1.18116	8.72675	909837	-1.14711e+06	-6.04179e+06	3.9286e+06	-2.64729e+06	4.85395e+06	2.77506e+06	1.05038	0.955765	0.993409	0	6	1.45769	1.44317	0.993409	0	6
0.534271	6.53755	2.36376	0.150227	3.88272	0.588551	12.4153	-6.59489e+32	8.90789e+32	1.82013e+33	7.91867e+32	-1.40047e+32	-5.41289e+32	4.19671e+33	1.0484	0.957541	0.957541	0	6	1.08587	0.992293	0.992293	0	6		1.61263	7.44586	0.265228	-0.553271	3.78852	1.17364	8.67144	895960	-1.15569e+06	-5.77127e+06	4.02046e+06	-2.50485e+06	4.88341e+06	2.30465e+06	1.0484	0.957541	0.993409	0	6	1.45769	1.44317	0.993409	0	6
0.943609	6.76612	1.5165	-0.0277305	3.90586	0.848247	11.1366	-7.96584e+32	-2.98181e+33	-2.99213e+33	1.04136e+33	1.95072e+32	-5.37134e+32	0	1.04846	0.95697	0.95697	0	6	1.45769	0.966143	0.966143	0	6		1.5844	7.20095	0.0513988	-0.435367	3.85254	1.22722	8.34557	879737	-1.1617e+06	-5.45666e+06	4.09846e+06	-2.359e+06	4.91243e+06	1.84958e+06	1.04846	0.95697	0.993409	0	6	1.45769	1.44317	0.993409	0	6
1.68835	6.3228	0.270468	-0.316811	3.7009	1.11231	9.87846	-1.6301e+33	3.50312e+30	-2.6073e+33	2.44076e+32	-1.95866e+33	-1.13005e+33	1.32577e+32	1.0507	0.955666	0.955666	0	6	0.999501	0.916266	0.916266	0	6		1.87941	6.36383	-0.430509	-0.435532	3.68866	1.2577	8.38186	861342	-1.16504e+06	-5.10332e+06	4.16273e+06	-2.21008e+06	4.94042e+06	1.41165e+06	1.0507	0.955666	0.993409	0	6	1.45769	1.44317	0.993409	0	6
1.96386	6.20921	-0.0769827	-0.339294	3.95438	1.2425	8.58275	3.32328e+33	7.95872e+33	9.87488e+33	-7.72659e+32	-2.27826e+33	-6.13585e+32	4.25938e+34	1.0508	0.955638	0.955638	0	6	1.45769	0.966143	0.966143	0	6		1.97196	6.22679	-0.0627794	-0.346	3.95356	1.24127	8.63436	840947	-1.16565e+06	-4.71653e+06	4.21346e+06	-2.05842e+06	4.96682e+06	992282	1.0508	0.955638	0.993409	0	6	1.45769	1.44317	0.993409	0	6
1.98076	6.45845	-0.423618	-0.397315	4.01047	1.38073	7.43085	-1.09646e+34	1.48101e+34	3.02613e+34	1.31655e+34	-2.3284e+33	-8.9994e+33	6.9774e+34	1.05317	0.954261	0.954261	0	6	1.08587	0.992293	0.992293	0	6		1.88859	6.47859	0.0198041	-0.334734	4.01257	1.31217	8.38875	818722	-1.1635e+06	-4.30141e+06	4.25094e+06	-1.90439e+06	4.99115e+06	592544	1.05317	0.954261	0.993409	0	6	1.45769	1.44317	0.993409	0	6
1.57808	7.05889	-1.2965	-0.375405	3.71785	1.30932	7.42032	-1.32439e+34	-4.95753e+34	-4.97468e+34	1.73136e+34	3.24324e+33	-8.93032e+33	0	1.0533	0.954222	0.954222	0	6	1.45769	0.966143	0.966143	0	6		1.50906	7.08323	-0.943411	-0.328716	3.71896	1.2563	8.18927	794835	-1.1586e+06	-3.86287e+06	4.27548e+06	-1.74836e+06	5.01297e+06	213227	1.0533	0.954222	0.993409	0	6	1.45769	1.44317	0.993409	0	6
1.77788	6.79301	-0.326552	-0.52105	3.71219	1.35106	6.38161	-2.71018e+34	5.82425e+31	-4.33486e+34	4.05798e+33	-3.25645e+34	-1.8788e+34	2.2042e+33	1.05336	0.954228	0.954228	0	6	0.999501	0.916266	0.916266	0	6		1.61973	6.81093	0.350995	-0.4093	3.71507	1.25469	7.79556	769454	-1.15096e+06	-3.40563e+06	4.28745e+06	-1.5907e+06	5.03189e+06	0	1.05336	0.954228	0.993409	0	6	1.45769	1.44317	0.993409	0	6
1.6508	7.34366	0.490587	-0.57524	3.71316	1.30927	7.71916	5.52524e+34	1.32321e+35	1.64179e+35	-1.28461e+34	-3.7878e+34	-1.02014e+34	7.0816e+35	1.05114	0.955505	0.955505	0	6	1.45769	0.966143	0.966143	0	6		1.55167	7.25843	0.637023	-0.505291	3.72	1.27577	7.91974	-2.52136e+06	9.02467e+06	4.21242e+06	-265294	-1.0433e+07	3.59382e+06	0	1.05114	0.955505	0.993409	0	6	0.999501	0.977946	0.977946	0	6
1.15321	6.34271	0.748611	-0.241632	3.76551	1.17819	8.66953	-1.82296e+35	2.46232e+35	5.0312e+35	2.18888e+35	-3.87117e+34	-1.49623e+35	1.16005e+36	1.04908	0.957024	0.957024	0	6	1.08587	0.992293	0.992293	0	6		1.25001	6.33356	0.364723	-0.296354	3.75948	1.2582	7.82787	-2.18116e+06	7.01092e+06	4.81098e+06	-368345	-1.03275e+07	3.92108e+06	0	1.04908	0.957024	0.993409	0	6	3.54955	2.02749	0.993409	0	6
1.93834	6.17652	0.565921	-0.389207	3.75674	1.38682	6.20484	-2.20192e+35	-8.24232e+35	-8.27085e+35	2.87854e+35	5.39216e+34	-1.48474e+35	0	1.05387	0.954037	0.954037	0	6	1.45769	0.966143	0.966143	0	6		1.8064	6.28016	1.38651	-0.298416	3.75531	1.27677	8.02414	-1.84499e+06	5.3711e+06	5.40797e+06	-448013	-1.02169e+07	4.16367e+06	0	1.05387	0.954037	0.993409	0	6	3.54955	2.02749	0.993409	0	6
1.92566	6.50685	0.733089	-0.587342	3.8554	1.3607	6.05147	-4.50591e+35	9.68332e+32	-7.20708e+35	6.74675e+34	-5.41412e+35	-3.12367e+35	3.66468e+34	1.054	0.954009	0.954009	0	6	0.999501	0.916266	0.916266	0	6		1.78418	6.62745	1.63044	-0.488719	3.85291	1.24474	8.0383	-1.52142e+06	4.03322e+06	5.96692e+06	-507674	-1.01031e+07	4.33502e+06	596733	1.054	0.954009	0.993409	0	6	3.54955	2.02749	0.993409	0	6
1.67578	6.4904	2.88162	-0.0846742	3.85669	1.1352	8.83731	9.18619e+35	2.19995e+36	2.72961e+36	-2.13578e+35	-6.29755e+35	-1.69607e+35	1.17738e+37	1.04952	0.956704	0.956704	0	6	1.45769	0.966143	0.966143	0	6		1.83783	6.56569	2.47702	-0.187028	3.84516	1.22748	8.05585	-1.21608e+06	2.94805e+06	6.38714e+06	-538300	-9.98836e+06	4.44406e+06	1.66384e+06	1.04952	0.956704	0.993409	0	6	1.08587	1.21398	0.993409	0	6
1.55233	5.99814	1.04459	0.0102196	3.90097	1.28083	6.04724	-3.03082e+36	4.09382e+36	8.36481e+36	3.6392e+36	-6.43616e+35	-2.48761e+36	1.92869e+37	1.05688	0.953817	0.953817	0	6	1.08587	0.992293	0.992293	0	6		1.54279	6.23602	1.78403	0.0265144	3.88593	1.22405	7.81817	-932252	2.07416e+06	6.60037e+06	-532659	-9.87417e+06	4.4999e+06	2.99576e+06	1.05688	0.953817	0.993409	0	6	1.08587	1.21398	0.993409	0	6
1.67448	6.23462	1.14997	0.306915	3.97894	1.29012	4.95761	-3.66088e+36	-1.37036e+37	-1.3751e+37	4.78582e+36	8.96494e+35	-2.46852e+36	0	1.06275	0.956218	0.956218	0	6	1.45769	0.966143	0.966143	0	6		1.81035	6.78181	2.24535	0.236517	3.93952	1.25366	7.78249	-671489	1.37521e+06	6.57675e+06	-487046	-9.76149e+06	4.51199e+06	4.43772e+06	1.06275	0.956218	0.993409	0	6	1.08587	1.21398	0.993409	0	6
1.91022	5.87971	0.512345	0.335246	4.00385	1.33187	4.95929	-7.49147e+36	1.60994e+34	-1.19824e+37	1.12171e+36	-9.00146e+36	-5.19337e+36	6.09285e+35	1.06953	0.960486	0.960486	0	6	0.999501	0.916266	0.916266	0	6		2.07668	6.42465	1.49368	0.24818	3.96232	1.32057	7.53437	-434114	819677	6.31374e+06	-400459	-9.65075e+06	4.48954e+06	5.8763e+06	1.06953	0.960486	0.993409	0	6	1.08587	1.21398	0.993409	0	6
2.14399	5.50341	-1.24934	0.659865	4.10997	1.27562	4.03485	1.52728e+37	3.65761e+37	4.53822e+37	-3.55092e+36	-1.04702e+37	-2.81987e+36	1.95749e+38	1.06986	0.96062	0.96062	0	6	1.45769	0.966143	0.966143	0	6		2.35563	6.2424	0.109782	0.539305	4.05777	1.23344	7.62091	-219616	380559	5.82744e+06	-273908	-9.54193e+06	4.44121e+06	7.23134e+06	1.06986	0.96062	0.993409	0	6	1.08587	1.21398	0.993409	0	6
2.10289	3.95772	-2.61725	0.782055	4.06827	1.34102	3.22477	-5.03901e+37	6.80633e+37	1.39072e+38	6.05048e+37	-1.07007e+37	-4.13587e+37	3.20662e+38	1.08332	0.968061	0.968061	0	6	1.08587	0.992293	0.992293	0	6		2.35042	4.81009	-1.07216	0.636092	4.00934	1.28728	7.32818	-26942.6	34948	5.14582e+06	-109861	-9.43472e+06	4.37483e+06	8.44906e+06	1.08332	0.968061	0.993409	0	6	1.08587	1.21398	0.993409	0	6
1.83819	0.960751	-4.456	1.0828	4.05846	1.37857	0	-6.08653e+37	-2.27834e+38	-2.28622e+38	7.95684e+37	1.4905e+37	-4.10412e+37	0	1.08937	0.970646	0.970646	0	6	1.45769	0.966143	0.966143	0	6		2.43275	3.05012	-0.644779	0.722604	3.9176	1.2226	7.46069	145274	-236369	4.30365e+06	88216	-9.32857e+06	4.29726e+06	9.49629e+06	1.08937	0.970646	0.993409	0	6	1.08587	1.21398	0.993409	0	6
1.08793	0.417056	-8.45696	1.51423	4.18189	1.40862	0	-1.24552e+38	2.67666e+35	-1.99218e+38	1.86493e+37	-1.49657e+38	-8.63444e+37	1.01299e+37	1.09609	0.973427	0.973427	0	6	0.999501	0.916266	0.916266	0	6		2.08594	3.97881	-1.92785	0.897611	3.94624	1.1121	7.80298	298563	-449329	3.33862e+06	316217	-9.2228e+06	4.21441e+06	1.03557e+07	1.09609	0.973427	0.993409	0	6	1.45769	1.44317	0.993409	0	6
0.943758	0.451004	-10.2718	1.80186	4.21689	1.4321	0	2.53924e+38	6.08109e+38	7.54519e+38	-5.90372e+37	-1.74077e+38	-4.68827e+37	3.2545e+39	1.11147	0.980342	0.980342	0	6	1.45769	0.966143	0.966143	0	6		2.05656	4.33202	-3.21915	1.13074	3.95373	1.14873	6.83519	434499	-617001	2.28865e+06	569683	-9.11662e+06	4.13116e+06	1.10218e+07	1.11147	0.980342	0.993409	0	6	1.45769	1.44317	0.993409	0	6
0.15715	-2.4094	-14.0415	2.1036	4.31843	1.53932	0	-8.3778e+38	1.13161e+39	2.3122e+39	1.00595e+39	-1.77908e+38	-6.87625e+38	5.33128e+39	1.14007	0.989805	0.989805	0	6	1.08587	0.992293	0.992293	0	6		1.93233	3.72706	-2.92692	1.04318	3.89833	1.1166	6.44243	554623	-749972	1.18994e+06	844016	-9.00919e+06	4.05147e+06	1.14978e+07	1.14007	0.989805	0.993409	0	6	1.45769	1.44317	0.993409	0	6
0.405525	-0.617966	-11.0141	2.09328	4.35474	1.48138	0	-1.01194e+39	-3.78794e+39	-3.80105e+39	1.3229e+39	2.47809e+38	-6.82347e+38	0	1.12001	0.985752	0.985752	0	6	1.45769	0.966143	0.966143	0	6		1.81722	4.29503	-2.09639	1.24316	4.02095	1.12406	6.52384	660397	-856708	75686.8	1.13465e+06	-8.8997e+06	3.97841e+06	1.1793e+07	1.12001	0.985752	0.993409	0	6	1.45769	1.44317	0.993409	0	6
0.201771	-1.63849	-11.2141	2.17411	4.42429	1.49736	0	-2.07079e+39	4.45018e+36	-3.31217e+39	3.10062e+38	-2.48818e+39	-1.43555e+39	1.68418e+38	1.15167	0.99835	0.99835	0	6	0.999501	0.916266	0.916266	0	6		1.724	3.60403	-1.73578	1.26788	4.06401	1.14191	6.07259	753171	-943878	-1.02465e+06	1.43717e+06	-8.78732e+06	3.91426e+06	1.19207e+07	1.15167	0.99835	0.993409	0	6	1.45769	1.44317	0.993409	0	6
0.382553	-0.711476	-9.68216	1.95506	4.32475	1.39347	0	4.22172e+39	1.01103e+40	1.25445e+40	-9.81545e+38	-2.89418e+39	-7.79467e+38	5.4109e+40	1.15623	0.997838	0.997838	0	6	1.45769	0.966143	0.966143	0	6		1.7028	3.86971	-1.37536	1.16254	4.01252	1.06669	6.37267	834168	-1.01665e+06	-2.08576e+06	1.74738e+06	-8.6713e+06	3.86059e+06	1.18967e+07	1.15623	0.997838	0.993409	0	6	1.45769	1.44317	0.993409	0	6
0.850086	-0.22532	-7.8737	1.86789	4.29669	1.25377	0	-1.39288e+40	1.8814e+40	3.84423e+40	1.67247e+40	-2.95788e+39	-1.14324e+40	8.86373e+40	1.13711	0.992599	0.992599	0	6	1.08587	0.992293	0.992293	0	6		1.84413	3.24274	-1.57375	1.26738	4.06176	0.996246	6.2703	904485	-1.07896e+06	-3.08655e+06	2.0614e+06	-8.55096e+06	3.81837e+06	1.17382e+07	1.13711	0.992599	0.993409	0	6	1.45769	1.44317	0.993409	0	6
1.0844	-0.321812	-6.99578	1.86082	4.33127	1.25803	0	-1.68244e+40	-6.29778e+40	-6.31958e+40	2.19943e+40	4.12004e+39	-1.13446e+40	0	1.15147	1.00065	1.00065	0	6	1.45769	0.966143	0.966143	0	6		2.0602	3.10944	-0.746636	1.26576	4.10092	0.988173	6.3227	965092	-1.13371e+06	-4.01007e+06	2.37565e+06	-8.42568e+06	3.78807e+06	1.14626e+07	1.15147	1.00065	0.993409	0	6	1.45769	1.44317	0.993409	0	6
1.33904	0.381224	-4.70897	1.80514	4.26427	1.21057	0	-3.44287e+40	7.39882e+37	-5.50677e+40	5.15505e+39	-4.13682e+40	-2.38673e+40	2.8001e+39	1.14397	1.00009	1.00009	0	6	0.999501	0.916266	0.916266	0	6		2.04335	2.8945	-0.109564	1.36813	4.09834	0.992988	6.21879	1.01684e+06	-1.18301e+06	-4.8433e+06	2.68692e+06	-8.29495e+06	3.76971e+06	1.10871e+07	1.14397	1.00009	0.993409	0	6	1.45769	1.44317	0.993409	0	6
1.16851	0.29683	-5.02259	1.94104	4.41426	1.23768	0	7.01897e+40	1.68093e+41	2.08564e+41	-1.63191e+40	-4.81183e+40	-1.29593e+40	8.99609e+41	1.15267	0.985695	0.985695	0	6	1.45769	0.966143	0.966143	0	6		2.09879	3.61281	1.04055	1.36403	4.19513	0.949505	6.05403	1.06047e+06	-1.22832e+06	-5.57678e+06	2.99234e+06	-8.15833e+06	3.76297e+06	1.0628e+07	1.15267	0.985695	0.993409	0	6	1.45769	1.44317	0.993409	0	6
3.37536	6.97433	5.99393	1.21161	4.16395	0.907546	18.1577	-2.31579e+41	3.128e+41	6.39137e+41	2.78063e+41	-4.91774e+40	-1.90073e+41	1.47367e+42	1.09648	0.976221	0.976221	0	6	1.08587	0.992293	0.992293	0	6		2.57319	4.29321	1.21207	1.67501	4.35423	1.05896	5.43198	1.09665e+06	-1.27057e+06	-6.20428e+06	3.28935e+06	-8.01548e+06	3.76726e+06	1.01006e+07	1.09648	0.976221	0.993409	0	6	1.45769	1.44317	0.993409	0	6
-6.136	-21.259	-49.1229	6.51872	6.02483	3.23284	0	-2.7972e+41	-1.04706e+42	-1.05068e+42	3.65674e+41	6.84992e+40	-1.88614e+41	0	1.1308	0.874374	0.874374	0	6	1.45769	0.966143	0.966143	0	6		1.83595	6.4618	0.979735	1.68823	4.14436	1.03082	4.71913	1.12593e+06	-1.31034e+06	-6.72238e+06	3.57577e+06	-7.86617e+06	3.78178e+06	9.51904e+06	1.1308	0.874374	0.993409	0	6	1.45769	1.44317	0.993409	0	6
-12.7504	-45.3692	-90.6657	10.8163	7.63059	5.4622	0	-5.72407e+41	1.23012e+39	-9.15549e+41	8.57072e+40	-6.87782e+41	-3.96815e+41	4.65541e+40	1.15117	0.861258	0.861258	0	6	0.999501	0.916266	0.916266	0	6		1.94715	5.92619	1.93277	1.83422	4.17026	1.06453	3.50421	1.14883e+06	-1.34791e+06	-7.13011e+06	3.8497e+06	-7.71023e+06	3.80558e+06	8.89602e+06	1.15117	0.861258	0.993409	0	6	1.45769	1.44317	0.993409	0	6
2.76304	8.8898	10.1804	1.17981	3.91275	0.706928	21.7358	1.16697e+42	2.7947e+42	3.46756e+42	-2.71318e+41	-8.00008e+41	-2.1546e+41	1.49568e+43	1.15338	0.848272	0.848272	0	6	1.45769	0.966143	0.966143	0	6		1.70091	5.14658	3.39713	1.83575	4.16256	1.04385	3.58684	1.16578e+06	-1.38334e+06	-7.42854e+06	4.10954e+06	-7.54759e+06	3.8376e+06	8.24291e+06	1.15338	0.848272	0.993409	0	6	1.45769	1.44317	0.993409	0	6
2.44923	8.71335	9.47076	1.30945	3.94454	0.743542	18.0812	-3.8502e+42	5.20057e+42	1.06262e+43	4.62304e+42	-8.17617e+41	-3.16013e+42	2.45011e+43	1.1564	0.846887	0.846887	0	6	1.08587	0.992293	0.992293	0	6		1.60139	5.7535	4.12929	1.82811	4.1441	0.999848	3.78955	1.17719e+06	-1.41655e+06	-7.62043e+06	4.35397e+06	-7.37828e+06	3.87671e+06	7.56974e+06	1.1564	0.846887	0.993409	0	6	1.45769	1.44317	0.993409	0	6
1.52735	4.76574	1.68443	2.20576	4.37258	1.09857	0	-4.65059e+42	-1.74083e+43	-1.74686e+43	6.07965e+42	1.13886e+42	-3.13587e+42	0	1.16355	0.846601	0.846601	0	6	1.45769	0.966143	0.966143	0	6		1.78939	5.64764	3.24939	2.05116	4.31074	1.03383	3.36107	1.18341e+06	-1.44738e+06	-7.70991e+06	4.58192e+06	-7.20236e+06	3.92177e+06	6.88527e+06	1.16355	0.846601	0.993409	0	6	1.45769	1.44317	0.993409	0	6
2.25202	7.20523	4.66973	2.0322	4.19192	0.856987	9.56986	-9.51677e+42	2.04518e+40	-1.52218e+43	1.42496e+42	-1.1435e+43	-6.59739e+42	7.74003e+41	1.16642	0.847207	0.847207	0	6	0.999501	0.916266	0.916266	0	6		1.90017	5.93207	2.34513	2.25676	4.27431	0.992004	3.33485	1.18477e+06	-1.47562e+06	-7.7022e+06	4.79253e+06	-7.02001e+06	3.97163e+06	6.19707e+06	1.16642	0.847207	0.993409	0	6	1.45769	1.44317	0.993409	0	6
2.5427	7.50796	5.99908	1.88827	4.08757	0.833525	10.4465	1.94018e+43	4.64643e+43	5.76512e+43	-4.51091e+42	-1.33008e+43	-3.58221e+42	2.4867e+44	1.16985	0.8471	0.8471	0	6	1.45769	0.966143	0.966143	0	6		2.11642	5.99481	3.25733	2.1549	4.18758	0.982194	3.09485	1.18159e+06	-1.50102e+06	-7.60331e+06	4.98517e+06	-6.83142e+06	4.02514e+06	5.51162e+06	1.16985	0.8471	0.993409	0	6	1.45769	1.44317	0.993409	0	6
2.64371	8.55109	6.71082	1.65837	4.07902	0.694198	14.0519	-6.40129e+43	8.6464e+43	1.7667e+44	7.68622e+43	-1.35936e+43	-5.254e+43	4.07352e+44	1.1827	0.847574	0.847574	0	6	1.08587	0.992293	0.992293	0	6		2.01706	6.24896	2.52047	2.071	4.22472	0.988882	2.74062	1.17414e+06	-1.52334e+06	-7.41985e+06	5.15938e+06	-6.63688e+06	4.08122e+06	4.83441e+06	1.1827	0.847574	0.993409	0	6	1.45769	1.44317	0.993409	0	6
2.72058	8.47828	5.10941	1.75538	4.36935	0.802515	11.4327	-7.73201e+43	-2.89428e+44	-2.9043e+44	1.0108e+44	1.89345e+43	-5.21366e+43	0	1.17907	0.847329	0.847329	0	6	1.45769	0.966143	0.966143	0	6		2.23785	6.70174	1.87009	2.07325	4.48163	1.0278	2.69485	1.16271e+06	-1.54237e+06	-7.15883e+06	5.31489e+06	-6.4367e+06	4.13882e+06	4.17004e+06	1.17907	0.847329	0.993409	0	6	1.45769	1.44317	0.993409	0	6
1.78111	6.83125	1.31608	1.92716	4.31692	1.08001	0	-1.58225e+44	3.40029e+41	-2.53076e+44	2.36912e+43	-1.90117e+44	-1.09687e+44	1.28685e+43	1.18021	0.847444	0.847444	0	6	0.999501	0.916266	0.916266	0	6		2.02478	7.65229	2.75907	1.78078	4.25974	1.00504	2.44209	1.14756e+06	-1.5579e+06	-6.82748e+06	5.45155e+06	-6.23125e+06	4.19695e+06	3.52234e+06	1.18021	0.847444	0.993409	0	6	1.45769	1.44317	0.993409	0	6
-0.815839	-2.85515	-14.9801	3.71872	5.03753	2.29951	0	3.22572e+44	7.7251e+44	9.58501e+44	-7.49978e+43	-2.21138e+44	-5.95574e+43	4.13435e+45	1.16872	0.846532	0.846532	0	6	1.45769	0.966143	0.966143	0	6		1.98766	7.25175	3.21021	1.89717	4.38589	1.0137	2.12437	1.12894e+06	-1.56978e+06	-6.43312e+06	5.56936e+06	-6.02093e+06	4.2547e+06	2.89441e+06	1.16872	0.846532	0.993409	0	6	1.45769	1.44317	0.993409	0	6
-0.388946	-1.23287	-12.3531	3.5134	5.06116	2.20272	0	-1.06427e+45	1.43754e+45	2.93729e+45	1.2779e+45	-2.26005e+44	-8.73523e+44	6.77258e+45	1.17376	0.847094	0.847094	0	6	1.08587	0.992293	0.992293	0	6		2.0925	7.72867	3.78183	1.89723	4.48461	1.05103	2.16346	1.10712e+06	-1.57789e+06	-5.98306e+06	5.66845e+06	-5.80618e+06	4.31124e+06	2.2888e+06	1.17376	0.847094	0.993409	0	6	1.45769	1.44317	0.993409	0	6
-0.341164	-3.42264	-12.398	3.54821	5.03249	2.34529	0	-1.28551e+45	-4.812e+45	-4.82865e+45	1.68054e+45	3.14803e+44	-8.66817e+44	0	1.1743	0.847668	0.847668	0	6	1.45769	0.966143	0.966143	0	6		2.25281	6.06761	4.66514	1.81712	4.43306	0.968437	1.84485	1.08234e+06	-1.58215e+06	-5.48446e+06	5.74903e+06	-5.58745e+06	4.36578e+06	1.7075e+06	1.1743	0.847668	0.993409	0	6	1.45769	1.44317	0.993409	0	6
-0.471319	-4.12197	-13.8953	3.46086	5.10262	2.3108	0	-2.63062e+45	5.65328e+42	-4.20761e+45	3.93886e+44	-3.16085e+45	-1.82365e+45	2.1395e+44	1.16986	0.846892	0.846892	0	6	0.999501	0.916266	0.916266	0	6		2.34952	6.16285	4.64651	1.59764	4.44888	0.905711	2.57716	1.05485e+06	-1.58252e+06	-4.94434e+06	5.81142e+06	-5.36522e+06	4.41765e+06	1.15207e+06	1.16986	0.846892	0.993409	0	6	1.45769	1.44317	0.993409	0	6
1.16579	2.23114	-2.49612	2.11845	4.67103	1.41051	0	5.36305e+45	1.28436e+46	1.59359e+46	-1.2469e+45	-3.67661e+45	-9.90193e+44	6.87372e+46	1.15953	0.869548	0.869548	0	6	1.45769	0.966143	0.966143	0	6		2.11134	5.65663	3.66597	1.49848	4.45168	0.953644	2.69595	1.02487e+06	-1.579e+06	-4.36943e+06	5.85603e+06	-5.14e+06	4.46621e+06	623659	1.15953	0.869548	0.993409	0	6	1.45769	1.44317	0.993409	0	6
1.4871	4.14221	-0.58604	1.98682	4.65323	1.2119	0	-1.76944e+46	2.39004e+46	4.88351e+46	2.12462e+46	-3.75754e+45	-1.45231e+46	1.126e+47	1.15413	0.883548	0.883548	0	6	1.08587	0.992293	0.992293	0	6		2.09035	6.34163	3.38581	1.58953	4.51327	0.918188	2.97491	992665	-1.57163e+06	-3.76621e+06	5.88331e+06	-4.91228e+06	4.51094e+06	123116	1.15413	0.883548	0.993409	0	6	1.45769	1.44317	0.993409	0	6
1.02228	2.56534	-4.14759	2.28498	4.89861	1.46744	0	-2.13728e+46	-8.00037e+46	-8.02806e+46	2.79404e+46	5.23388e+45	-1.44116e+46	0	1.1598	0.869017	0.869017	0	6	1.45769	0.966143	0.966143	0	6		2.04037	6.27783	2.52991	1.60982	4.663	0.944908	2.58352	958454	-1.56047e+06	-3.1408e+06	5.8938e+06	-4.68258e+06	4.55135e+06	0	1.1598	0.869017	0.993409	0	6	1.45769	1.44317	0.993409	0	6
1.08074	1.93321	-5.03218	2.2945	5.01193	1.53764	0	-4.37364e+46	9.39907e+43	-6.99552e+46	6.5487e+45	-5.25519e+46	-3.03197e+46	3.5571e+45	1.16024	0.867774	0.867774	0	6	0.999501	0.916266	0.916266	0	6		2.25951	6.21679	2.6743	1.51765	4.73876	0.952586	2.58654	-3.71505e+06	1.30284e+07	5.7917e+06	-123268	-1.7091e+07	1.78059e+06	211998	1.16024	0.867774	0.993409	0	6	0.999501	0.977946	0.977946	0	6
1.43335	3.84546	-2.15858	1.85072	4.73512	1.22983	0	8.91653e+46	2.13537e+47	2.64949e+47	-2.07309e+46	-6.11269e+46	-1.64628e+46	1.14282e+48	1.15509	0.881323	0.881323	0	6	1.45769	0.966143	0.966143	0	6		2.09147	6.21827	2.10324	1.42164	4.58233	0.919517	2.69128	-3.24265e+06	1.01656e+07	6.68435e+06	-266100	-1.6934e+07	2.29246e+06	0	1.15509	0.881323	0.993409	0	6	1.08587	1.21398	0.993409	0	6
1.74279	4.67941	-0.0476987	1.58174	4.72722	1.07463	0	-2.94186e+47	3.97364e+47	8.11926e+47	3.53237e+47	-6.24723e+46	-2.41459e+47	1.87208e+48	1.14988	0.894915	0.894915	0	6	1.08587	0.992293	0.992293	0	6		2.14409	6.1211	2.53976	1.32141	4.63398	0.890033	2.77424	-2.77408e+06	7.83141e+06	7.60567e+06	-380568	-1.67688e+07	2.68438e+06	0	1.14988	0.894915	0.993409	0	6	3.54955	2.02749	0.993409	0	6
1.68723	5.09628	1.21533	1.38404	4.76995	1.05744	0	-3.55341e+47	-1.33013e+48	-1.33473e+48	4.64533e+47	8.70178e+46	-2.39605e+47	0	1.14488	0.951486	0.951486	0	6	1.45769	0.966143	0.966143	0	6		1.93395	5.97626	2.7882	1.22493	4.71261	0.945795	2.8283	-2.32186e+06	5.92716e+06	8.4728e+06	-467310	-1.65986e+07	2.97396e+06	455072	1.14488	0.951486	0.993409	0	6	3.54955	2.02749	0.993409	0	6
1.7034	5.14766	1.74039	1.43593	4.68618	1.00585	0	-7.27156e+47	1.56268e+45	-1.16307e+48	1.08878e+47	-8.73722e+47	-5.04092e+47	5.91399e+46	1.1398	0.986791	0.986791	0	6	0.999501	0.916266	0.916266	0	6		1.87921	5.7845	2.8879	1.32109	4.64533	0.923368	2.9555	-1.89417e+06	4.37713e+06	9.19334e+06	-521242	-1.64259e+07	3.17556e+06	1.65511e+06	1.1398	0.986791	0.993409	0	6	1.08587	1.21398	0.993409	0	6
1.54794	4.86155	1.02486	1.3113	5.09193	0.766617	0	1.48245e+48	3.55024e+48	4.405e+48	-3.44669e+47	-1.01629e+48	-2.73709e+47	1.90003e+49	1.14536	0.947005	0.947005	0	6	1.45769	0.966143	0.966143	0	6		1.82758	5.87919	2.85563	1.12664	5.02714	0.626476	2.91529	-1.49593e+06	3.12459e+06	9.65582e+06	-530682	-1.62534e+07	3.30094e+06	3.30014e+06	1.14536	0.947005	0.993409	0	6	1.08587	1.21398	0.993409	0	6
1.85864	5.40732	3.34821	1.02757	4.87704	0.910782	2.93556	-4.89109e+48	6.60653e+48	1.3499e+49	5.87287e+48	-1.03866e+48	-4.01447e+48	3.11249e+49	1.13675	0.990115	0.990115	0	6	1.08587	0.992293	0.992293	0	6		1.85784	5.39644	3.32295	1.02961	4.87717	0.915479	2.86659	-1.12957e+06	2.11948e+06	9.80542e+06	-489077	-1.60824e+07	3.36264e+06	5.16218e+06	1.13675	0.990115	0.993409	0	6	1.08587	1.21398	0.993409	0	6
1.82701	5.17675	2.47958	1.21244	4.75965	0.989193	0.827873	-5.90786e+48	-2.21146e+49	-2.21911e+49	7.72327e+48	1.44675e+48	-3.98365e+48	0	1.13485	0.967561	0.967561	0	6	1.45769	0.966143	0.966143	0	6		1.95184	5.64391	3.32692	1.12749	4.73081	0.919213	3.12937	-795736	1.31817e+06	9.62817e+06	-393827	-1.59138e+07	3.37314e+06	7.07214e+06	1.13485	0.967561	0.993409	0	6	1.08587	1.21398	0.993409	0	6
1.46775	5.8473	1.94088	1.2306	4.7859	1.01975	0.709081	-1.20896e+49	2.59809e+46	-1.9337e+49	1.81019e+48	-1.45264e+49	-8.38098e+48	9.83253e+47	1.13659	0.992283	0.992283	0	6	0.999501	0.916266	0.916266	0	6		1.60669	6.3426	2.82611	1.14119	4.75358	0.957829	3.10663	-493847	683045	9.13841e+06	-245319	-1.57478e+07	3.34427e+06	8.90861e+06	1.13659	0.992283	0.993409	0	6	1.08587	1.21398	0.993409	0	6
1.24126	6.31592	3.28774	1.11977	4.81477	0.924849	1.25897	2.46471e+49	5.90258e+49	7.3237e+49	-5.73042e+48	-1.68967e+49	-4.55065e+48	3.15897e+50	1.13412	0.996479	0.996479	0	6	1.45769	0.966143	0.966143	0	6		1.35125	6.67892	3.9202	1.05529	4.78888	0.895897	2.96143	-222523	182053	8.36905e+06	-46126.2	-1.55842e+07	3.2869e+06	1.05882e+07	1.13412	0.996479	0.993409	0	6	1.08587	1.21398	0.993409	0	6
1.37219	6.00632	3.72194	1.00603	4.79573	0.923386	2.03099	-8.13187e+49	1.09839e+50	2.24432e+50	9.76417e+49	-1.72686e+49	-6.6744e+49	5.17479e+50	1.12828	0.980371	0.980371	0	6	1.08587	0.992293	0.992293	0	6		1.44434	6.20582	4.04123	0.971374	4.77842	0.926881	2.88313	20097.5	-211826	7.3641e+06	199641	-1.54222e+07	3.2107e+06	1.20573e+07	1.12828	0.980371	0.993409	0	6	1.08587	1.21398	0.993409	0	6
1.37496	5.3212	4.70406	0.700389	4.78113	0.859859	2.71976	-9.82234e+49	-3.67675e+50	-3.68947e+50	1.28406e+50	2.40534e+49	-6.62316e+49	0	1.11959	0.971688	0.971688	0	6	1.45769	0.966143	0.966143	0	6		1.4332	5.46404	4.91802	0.67627	4.76697	0.874694	3.28368	236127	-521120	6.17309e+06	486859	-1.52611e+07	3.124e+06	1.32858e+07	1.11959	0.971688	0.993409	0	6	1.45769	1.44317	0.993409	0	6
1.30874	6.05187	5.67053	0.65744	4.84075	0.839892	4.22861	-2.01e+50	4.31955e+47	-3.21494e+50	3.0096e+49	-2.41514e+50	-1.39341e+50	1.63474e+49	1.09705	0.958719	0.958719	0	6	0.999501	0.916266	0.916266	0	6		1.30571	6.02479	5.61045	0.66252	4.84133	0.850204	4.06451	427763	-764403	4.84695e+06	809796	-1.51e+07	3.03385e+06	1.42607e+07	1.09705	0.958719	0.993409	0	6	1.45769	1.44317	0.993409	0	6
1.80137	6.05795	6.28367	0.586118	4.77864	0.806902	6.30807	4.09779e+50	9.81356e+50	1.21763e+51	-9.52732e+49	-2.80922e+50	-7.56586e+49	5.25206e+51	1.09285	0.961645	0.961645	0	6	1.45769	0.966143	0.966143	0	6		1.67516	5.59667	5.43978	0.66661	4.8084	0.853488	4.05056	597176	-956802	3.43508e+06	1.16244e+06	-1.49376e+07	2.94597e+06	1.49822e+07	1.09285	0.961645	0.993409	0	6	1.45769	1.44317	0.993409	0	6
1.64968	6.63142	6.88589	0.502676	4.77191	0.811559	6.1515	-1.35199e+51	1.82617e+51	3.73138e+51	1.62338e+51	-2.87105e+50	-1.10968e+51	8.60354e+51	1.09282	0.961873	0.961873	0	6	1.08587	0.992293	0.992293	0	6		1.54515	6.24628	6.17911	0.569959	4.79653	0.85193	4.26011	746431	-1.11048e+06	1.98344e+06	1.53874e+06	-1.4773e+07	2.8649e+06	1.54598e+07	1.09282	0.961873	0.993409	0	6	1.45769	1.44317	0.993409	0	6
1.49692	6.32188	7.01955	0.383693	4.73208	0.807617	7.04034	-1.63305e+51	-6.11291e+51	-6.13407e+51	2.13487e+51	3.99909e+50	-1.10116e+51	0	1.08612	0.960594	0.960594	0	6	1.45769	0.966143	0.966143	0	6		1.34808	5.75309	5.96408	0.482936	4.76714	0.874511	4.2148	877446	-1.2351e+06	533287	1.93277e+06	-1.4605e+07	2.7941e+06	1.57091e+07	1.08612	0.960594	0.993409	0	6	1.45769	1.44317	0.993409	0	6
1.56266	6.79005	7.33501	0.265728	4.76909	0.80593	7.68481	-3.3418e+51	7.18163e+48	-5.34512e+51	5.00372e+50	-4.01538e+51	-2.31667e+51	2.71791e+50	1.08234	0.95997	0.95997	0	6	0.999501	0.916266	0.916266	0	6		1.38717	6.15857	6.19128	0.373867	4.8111	0.85815	4.63742	991965	-1.33819e+06	-879482	2.33889e+06	-1.44327e+07	2.73601e+06	1.575e+07	1.08234	0.95997	0.993409	0	6	1.45769	1.44317	0.993409	0	6
1.53428	6.41044	7.25425	0.097939	4.8667	0.827834	7.42939	6.81293e+51	1.63159e+52	2.02442e+52	-1.584e+51	-4.67058e+51	-1.25789e+51	8.73201e+52	1.08378	0.958214	0.958214	0	6	1.45769	0.966143	0.966143	0	6		1.39345	5.8401	6.18676	0.195927	4.90035	0.902014	4.57458	1.09155e+06	-1.42552e+06	-2.2246e+06	2.75182e+06	-1.4255e+07	2.69226e+06	1.56046e+07	1.08378	0.958214	0.993409	0	6	1.45769	1.44317	0.993409	0	6
1.46955	6.74377	8.46983	-0.0514339	4.88822	0.859925	9.3674	-2.24781e+52	3.03618e+52	6.20375e+52	2.69901e+52	-4.77338e+51	-1.84494e+52	1.43041e+53	1.08065	0.957	0.957	0	6	1.08587	0.992293	0.992293	0	6		1.2537	5.87135	6.88272	0.0852619	4.94421	0.935318	5.17776	1.1776e+06	-1.50143e+06	-3.47736e+06	3.16668e+06	-1.40712e+07	2.66371e+06	1.52956e+07	1.08065	0.957	0.993409	0	6	1.45769	1.44317	0.993409	0	6
1.66029	6.60689	8.22879	0.0676704	4.73846	0.769055	9.32812	-2.71509e+52	-1.01632e+53	-1.01984e+53	3.5494e+52	6.64884e+51	-1.83077e+52	0	1.07844	0.956002	0.956002	0	6	1.45769	0.966143	0.966143	0	6		1.47603	5.77436	6.70984	0.185427	4.79099	0.840191	5.35804	1.25132e+06	-1.56908e+06	-4.61841e+06	3.57905e+06	-1.38806e+07	2.65065e+06	1.48461e+07	1.07844	0.956002	0.993409	0	6	1.45769	1.44317	0.993409	0	6
1.865	5.61834	8.23347	-0.158996	4.81484	0.818255	10.2602	-5.55604e+52	1.19401e+50	-8.88674e+52	8.31913e+51	-6.67592e+52	-3.85166e+52	4.51876e+51	1.07851	0.957551	0.957551	0	6	0.999501	0.916266	0.916266	0	6		1.61912	4.6302	6.41418	-0.00181573	4.87767	0.91089	5.44972	1.3138e+06	-1.63072e+06	-5.63331e+06	3.98494e+06	-1.36824e+07	2.65284e+06	1.4278e+07	1.07851	0.957551	0.993409	0	6	1.45769	1.44317	0.993409	0	6
1.63829	5.90539	7.08695	-0.100463	4.85362	0.767979	9.64738	1.13271e+53	2.71266e+53	3.36577e+53	-2.63354e+52	-7.76524e+52	-2.09135e+52	1.45177e+54	1.07233	0.955263	0.955263	0	6	1.45769	0.966143	0.966143	0	6		1.50734	5.20669	5.77634	-0.02335	4.89903	0.817905	6.29703	1.36595e+06	-1.68783e+06	-6.51209e+06	4.38086e+06	-1.34763e+07	2.66964e+06	1.36121e+07	1.07233	0.955263	0.993409	0	6	1.45769	1.44317	0.993409	0	6
1.69042	5.54479	6.61829	0.289658	4.96543	0.794669	10.231	-3.73718e+53	5.04791e+53	1.03143e+54	4.48734e+53	-7.93616e+52	-3.06737e+53	2.37819e+54	1.0718	0.955317	0.955317	0	6	1.08587	0.992293	0.992293	0	6		1.53256	4.70928	5.0336	0.386513	5.01845	0.865938	6.16029	1.40861e+06	-1.74135e+06	-7.24874e+06	4.76373e+06	-1.32618e+07	2.70012e+06	1.28678e+07	1.0718	0.955317	0.993409	0	6	1.45769	1.44317	0.993409	0	6
2.61606	8.15603	9.36715	-0.231623	4.78208	0.67355	18.0908	-4.51407e+53	-1.68973e+54	-1.69558e+54	5.90119e+53	1.10543e+53	-3.04382e+53	0	1.07886	0.962764	0.962764	0	6	1.45769	0.966143	0.966143	0	6		1.90417	5.6757	4.88183	0.187649	4.95363	0.830821	6.18983	1.44248e+06	-1.79178e+06	-7.84067e+06	5.1309e+06	-1.30388e+07	2.74311e+06	1.20624e+07	1.07886	0.962764	0.993409	0	6	1.45769	1.44317	0.993409	0	6
2.10874	7.27531	7.38047	-0.0536584	4.80924	0.702244	13.5872	-9.23741e+53	1.98514e+51	-1.4775e+54	1.38313e+53	-1.10993e+54	-6.40372e+53	7.51283e+52	1.07515	0.95851	0.95851	0	6	0.999501	0.916266	0.916266	0	6		1.68835	5.69197	4.47832	0.198919	4.91565	0.818814	5.92864	1.46819e+06	-1.83932e+06	-8.2882e+06	5.48011e+06	-1.28071e+07	2.79727e+06	1.12117e+07	1.07515	0.95851	0.993409	0	6	1.45769	1.44317	0.993409	0	6
2.00784	6.85246	6.79401	0.0502233	4.72389	0.749056	13.405	1.88323e+54	4.51004e+54	5.59588e+54	-4.37849e+53	-1.29104e+54	-3.47706e+53	2.4137e+55	1.07527	0.95856	0.95856	0	6	1.45769	0.966143	0.966143	0	6		1.59078	5.29316	3.94306	0.298938	4.82942	0.858917	5.88355	1.48631e+06	-1.88395e+06	-8.59409e+06	5.8095e+06	-1.25666e+07	2.86115e+06	1.03296e+07	1.07527	0.95856	0.993409	0	6	1.45769	1.44317	0.993409	0	6
2.32533	6.58619	7.32537	0.0557583	4.76579	0.71606	12.9077	-6.21339e+54	8.39259e+54	1.71484e+55	7.46059e+54	-1.31946e+54	-5.09977e+54	3.95394e+55	1.07787	0.960378	0.960378	0	6	1.08587	0.992293	0.992293	0	6		1.91348	5.12146	4.67538	0.298588	4.8667	0.809748	5.89011	1.49735e+06	-1.92548e+06	-8.76307e+06	6.11751e+06	-1.23175e+07	2.93325e+06	9.42836e+06	1.07787	0.960378	0.993409	0	6	1.45769	1.44317	0.993409	0	6
2.17379	6.62781	7.33616	-0.0403501	4.75542	0.707392	12.9424	-7.50504e+54	-2.80932e+55	-2.81905e+55	9.81124e+54	1.83787e+54	-5.06062e+54	0	1.07848	0.96023	0.96023	0	6	1.45769	0.966143	0.966143	0	6		1.76178	5.15444	4.66929	0.204235	4.85632	0.805388	5.87692	1.50176e+06	-1.96366e+06	-8.80146e+06	6.40292e+06	-1.20599e+07	3.01207e+06	8.51858e+06	1.07848	0.96023	0.993409	0	6	1.45769	1.44317	0.993409	0	6
2.05425	5.42876	5.91482	-0.0904731	4.79402	0.734808	11.7839	-1.5358e+55	3.30047e+52	-2.45647e+55	2.29957e+54	-1.84536e+55	-1.06468e+55	1.24907e+54	1.07675	0.958458	0.958458	0	6	0.999501	0.916266	0.916266	0	6		1.72426	4.20755	3.70053	0.104185	4.87759	0.813335	5.94401	1.49997e+06	-1.99819e+06	-8.71678e+06	6.6648e+06	-1.17941e+07	3.09609e+06	7.60936e+06	1.07675	0.958458	0.993409	0	6	1.45769	1.44317	0.993409	0	6
2.11683	5.57495	4.72803	0.0936654	4.84755	0.739825	9.6869	3.13103e+55	7.49833e+55	9.30365e+55	-7.27962e+54	-2.14647e+55	-5.78091e+54	4.01299e+56	1.07572	0.956788	0.956788	0	6	1.45769	0.966143	0.966143	0	6		1.93238	4.85711	3.441	0.19644	4.89832	0.770227	6.33472	1.49238e+06	-2.02875e+06	-8.51746e+06	6.90245e+06	-1.15205e+07	3.18387e+06	6.70846e+06	1.07572	0.956788	0.993409	0	6	1.45769	1.44317	0.993409	0	6
2.24989	6.55384	4.88567	0.0129243	4.87261	0.736996	11.7003	-1.03303e+56	1.39534e+56	2.85107e+56	1.24039e+56	-2.19371e+55	-8.47881e+55	6.57378e+56	1.07684	0.95858	0.95858	0	6	1.08587	0.992293	0.992293	0	6		1.92165	5.371	2.76048	0.20076	4.95582	0.797954	6.10352	1.47936e+06	-2.05504e+06	-8.21252e+06	7.11542e+06	-1.12393e+07	3.27399e+06	5.8224e+06	1.07684	0.95858	0.993409	0	6	1.45769	1.44317	0.993409	0	6
2.1832	6.00872	3.85572	0.031474	4.67213	0.717955	11.1897	-1.24778e+56	-4.67074e+56	-4.68691e+56	1.6312e+56	3.05562e+55	-8.41372e+55	0	1.07831	0.958293	0.958293	0	6	1.45769	0.966143	0.966143	0	6		1.87413	4.86416	1.78979	0.214364	4.75034	0.791154	5.73834	1.46127e+06	-2.07679e+06	-7.81141e+06	7.30347e+06	-1.09512e+07	3.36513e+06	4.95663e+06	1.07831	0.958293	0.993409	0	6	1.45769	1.44317	0.993409	0	6
1.71977	6.63742	4.94732	-0.00903632	4.82379	0.723669	9.16537	-2.5534e+56	5.48733e+53	-4.0841e+56	3.82324e+55	-3.06807e+56	-1.77012e+56	2.07669e+55	1.07864	0.958274	0.958274	0	6	0.999501	0.916266	0.916266	0	6		1.51611	5.93172	3.70919	0.101347	4.87592	0.742068	5.91597	1.43847e+06	-2.09379e+06	-7.32374e+06	7.46654e+06	-1.06565e+07	3.45605e+06	4.11561e+06	1.07864	0.958274	0.993409	0	6	1.45769	1.44317	0.993409	0	6
1.83879	6.5197	4.33016	0.0342662	4.8255	0.752115	8.25415	5.20562e+56	1.24666e+57	1.54681e+57	-1.2103e+56	-3.56869e+56	-9.61127e+55	6.67194e+57	1.08122	0.956235	0.956235	0	6	1.45769	0.966143	0.966143	0	6		1.68816	5.8795	3.17808	0.129183	4.86663	0.80262	5.23019	1.4113e+06	-2.10584e+06	-6.75916e+06	7.60472e+06	-1.03559e+07	3.54562e+06	3.30299e+06	1.08122	0.956235	0.993409	0	6	1.45769	1.44317	0.993409	0	6
1.702	7.21381	5.51169	0.123787	4.91101	0.763379	8.59625	-1.7175e+57	2.31988e+57	4.74016e+57	2.06225e+57	-3.64724e+56	-1.40968e+57	1.09295e+58	1.08026	0.95642	0.95642	0	6	1.08587	0.992293	0.992293	0	6		1.53178	6.51173	4.25287	0.227574	4.95736	0.8115	5.29669	1.38008e+06	-2.11283e+06	-6.12722e+06	7.71828e+06	-1.005e+07	3.63278e+06	2.52167e+06	1.08026	0.95642	0.993409	0	6	1.45769	1.44317	0.993409	0	6
1.71931	6.91096	6.46291	0.0698079	4.74065	0.72632	10.0815	-2.07454e+57	-7.76552e+57	-7.7924e+57	2.71202e+57	5.08024e+56	-1.39885e+57	0	1.08143	0.957672	0.957672	0	6	1.45769	0.966143	0.966143	0	6		1.44215	5.8352	4.50682	0.244046	4.81037	0.818581	4.90073	1.34515e+06	-2.1147e+06	-5.43724e+06	7.80759e+06	-9.73941e+06	3.71658e+06	1.77393e+06	1.08143	0.957672	0.993409	0	6	1.45769	1.44317	0.993409	0	6
1.88609	5.88317	6.62175	-0.194407	4.74141	0.706593	9.14539	-4.24525e+57	9.12316e+54	-6.79017e+57	6.35647e+56	-5.10093e+57	-2.94297e+57	3.45269e+56	1.08127	0.957775	0.957775	0	6	0.999501	0.916266	0.916266	0	6		1.66748	5.05028	5.11584	-0.059894	4.79647	0.770965	5.16098	1.30683e+06	-2.11142e+06	-4.69827e+06	7.87313e+06	-9.42472e+06	3.79618e+06	1.06149e+06	1.08127	0.957775	0.993409	0	6	1.45769	1.44317	0.993409	0	6
1.5846	5.95954	5.95159	0.114006	4.73745	0.745025	6.70746	8.65479e+57	2.07269e+58	2.57171e+58	-2.01223e+57	-5.93326e+57	-1.59796e+57	1.10927e+59	1.07991	0.954926	0.954926	0	6	1.45769	0.966143	0.966143	0	6		1.55598	5.71166	5.5289	0.13184	4.75283	0.754361	5.65825	1.26543e+06	-2.10302e+06	-3.91897e+06	7.91551e+06	-9.10664e+06	3.87082e+06	385623	1.07991	0.954926	0.993409	0	6	1.45769	1.44317	0.993409	0	6
1.41115	6.16382	6.11973	-0.373822	4.80004	0.719676	8.90097	-2.8555e+58	3.857e+58	7.88092e+58	3.42868e+58	-6.06385e+57	-2.34371e+58	1.81712e+59	1.07941	0.956738	0.956738	0	6	1.08587	0.992293	0.992293	0	6		1.22487	5.42401	4.79568	-0.263311	4.85008	0.7644	5.43023	1.22128e+06	-2.08959e+06	-3.10763e+06	7.93539e+06	-8.78585e+06	3.93986e+06	0	1.07941	0.956738	0.993409	0	6	1.45769	1.44317	0.993409	0	6
1.61632	5.56993	5.13817	-0.148947	4.85295	0.752721	5.56714	-3.4491e+58	-1.29109e+59	-1.29555e+59	4.50897e+58	8.44634e+57	-2.32572e+58	0	1.08	0.956667	0.956667	0	6	1.45769	0.966143	0.966143	0	6		1.63574	5.54155	5.1109	-0.161166	4.85425	0.745671	5.5478	-5.19845e+06	1.81208e+07	7.61208e+06	70722.6	-2.57219e+07	-472791	690717	1.08	0.956667	0.993409	0	6	0.999501	0.977946	0.977946	0	6
1.70069	6.59144	5.65223	-0.160015	4.71434	0.751595	6.60027	-7.0581e+58	1.51681e+56	-1.12892e+59	1.05682e+58	-8.48074e+58	-4.89295e+58	5.74039e+57	1.07898	0.955091	0.955091	0	6	0.999501	0.916266	0.916266	0	6		1.70714	6.32699	5.20611	-0.15975	4.72841	0.76365	5.54859	-4.55869e+06	1.41706e+07	8.86184e+06	-115319	-2.54987e+07	274841	0	1.07898	0.955091	0.993409	0	6	1.45769	1.44317	0.993409	0	6
1.73113	6.07273	6.14662	0.0456279	4.80379	0.746314	6.26525	1.43893e+59	3.44602e+59	4.27569e+59	-3.34551e+58	-9.86456e+58	-2.65674e+58	1.84426e+60	1.08002	0.955155	0.955155	0	6	1.45769	0.966143	0.966143	0	6		1.72822	5.83386	5.72583	0.0557702	4.81522	0.771148	5.23278	-3.92221e+06	1.09446e+07	1.02087e+07	-270793	-2.5263e+07	858533	0	1.08002	0.955155	0.993409	0	6	3.54955	2.02749	0.993409	0	6
1.58946	6.13288	7.15049	-0.0257096	4.89986	0.773953	8.17597	-4.74752e+59	6.4126e+59	1.31027e+60	5.70048e+59	-1.00817e+59	-3.89662e+59	3.02112e+60	1.07992	0.955619	0.955619	0	6	1.08587	0.992293	0.992293	0	6		1.46095	5.52141	6.05496	0.0553746	4.93875	0.81876	5.33084	-3.30675e+06	8.31317e+06	1.14811e+07	-388825	-2.50195e+07	1.29996e+06	314057	1.07992	0.955619	0.993409	0	6	3.54955	2.02749	0.993409	0	6
1.70117	7.06899	8.08593	-0.129805	4.84195	0.735899	8.37713	-5.73444e+59	-2.14654e+60	-2.15397e+60	7.49656e+59	1.40428e+59	-3.86671e+59	0	1.08018	0.955631	0.955631	0	6	1.45769	0.966143	0.966143	0	6		1.56349	6.42393	6.93844	-0.0447632	4.88365	0.778128	5.40068	-2.72376e+06	6.16713e+06	1.25916e+07	-468575	-2.47717e+07	1.62027e+06	1.71635e+06	1.08018	0.955631	0.993409	0	6	1.08587	1.21398	0.993409	0	6
1.45933	6.43247	7.51166	-0.193137	4.83532	0.699922	7.73614	-1.17347e+60	2.52182e+57	-1.87694e+60	1.75705e+59	-1.41e+60	-8.13496e+59	9.5439e+58	1.0803	0.954989	0.954989	0	6	0.999501	0.916266	0.916266	0	6		1.37746	5.84949	6.47092	-0.133203	4.86879	0.751787	5.08027	-2.18031e+06	4.4298e+06	1.33748e+07	-492817	-2.45232e+07	1.83475e+06	3.7867e+06	1.0803	0.954989	0.993409	0	6	1.08587	1.21398	0.993409	0	6
1.2668	5.72543	7.86836	-0.146279	4.85263	0.7131	6.63648	2.39235e+60	5.72931e+60	7.10872e+60	-5.56221e+59	-1.64007e+60	-4.41707e+59	3.06624e+61	1.08092	0.95514	0.95514	0	6	1.45769	0.966143	0.966143	0	6		1.25713	5.40867	7.31373	-0.129409	4.86803	0.745743	5.26563	-1.67995e+06	3.03326e+06	1.37451e+07	-451485	-2.42763e+07	1.95999e+06	6.20414e+06	1.08092	0.95514	0.993409	0	6	1.08587	1.21398	0.993409	0	6
1.63541	5.24545	7.16941	-0.249743	4.93861	0.72443	7.37691	-7.89316e+60	1.06615e+61	2.17844e+61	9.47754e+60	-1.67617e+60	-6.47848e+60	5.02288e+61	1.07764	0.954887	0.954887	0	6	1.08587	0.992293	0.992293	0	6		1.62154	4.83654	6.43487	-0.2321	4.95999	0.760946	5.57634	-1.22375e+06	1.91814e+06	1.3675e+07	-340063	-2.40323e+07	2.01271e+06	8.72917e+06	1.07764	0.954887	0.993409	0	6	1.08587	1.21398	0.993409	0	6
1.48166	4.8697	6.90273	-0.411431	4.84092	0.684892	7.01152	-9.534e+60	-3.56882e+61	-3.58117e+61	1.24637e+61	2.33474e+60	-6.42874e+60	0	1.07483	0.955487	0.955487	0	6	1.45769	0.966143	0.966143	0	6		1.5412	4.60769	6.43031	-0.441958	4.85249	0.700612	5.98402	-811064	1.0331e+06	1.31773e+07	-158252	-2.37915e+07	2.00893e+06	1.11884e+07	1.07483	0.955487	0.993409	0	6	1.08587	1.21398	0.993409	0	6
1.53109	5.02593	5.81659	-0.33315	4.93536	0.727445	5.44707	-1.951e+61	4.19275e+58	-3.12057e+61	2.92125e+60	-2.34424e+61	-1.35251e+61	1.58676e+60	1.07307	0.960515	0.960515	0	6	0.999501	0.916266	0.916266	0	6		1.52469	5.16351	6.10827	-0.34339	4.93228	0.684838	6.19485	-440086	334260	1.2292e+07	91139.3	-2.35539e+07	1.96341e+06	1.34612e+07	1.07307	0.960515	0.993409	0	6	1.08587	1.21398	0.993409	0	6
1.63131	5.9014	7.30751	-0.376317	4.84193	0.684663	6.58157	3.9775e+61	9.52548e+61	1.18189e+62	-9.24765e+60	-2.72676e+61	-7.34376e+60	5.09789e+62	1.07295	0.957151	0.957151	0	6	1.45769	0.966143	0.966143	0	6		1.74056	5.73066	6.98046	-0.434406	4.84564	0.700505	5.97596	-108333	-215467	1.10756e+07	403091	-2.33187e+07	1.8894e+06	1.54689e+07	1.07295	0.957151	0.993409	0	6	1.45769	1.44317	0.993409	0	6
1.39941	6.02988	7.54462	-0.479057	4.90947	0.687337	5.98799	-1.31231e+62	1.77257e+62	3.62185e+62	1.57572e+62	-2.78677e+61	-1.0771e+62	8.35098e+62	1.07271	0.960195	0.960195	0	6	1.08587	0.992293	0.992293	0	6		1.48574	5.95685	7.40409	-0.524505	4.90869	0.696702	5.78812	187050	-647099	9.59313e+06	771099	-2.30848e+07	1.79839e+06	1.71652e+07	1.07271	0.960195	0.993409	0	6	1.45769	1.44317	0.993409	0	6
1.54778	5.79185	7.59601	-0.397861	4.86228	0.688029	5.65652	-1.58511e+62	-5.93347e+62	-5.954e+62	2.0722e+62	3.8817e+61	-1.06883e+62	0	1.07132	0.963379	0.963379	0	6	1.45769	0.966143	0.966143	0	6		1.58396	5.78932	7.59183	-0.418731	4.86091	0.68627	5.71081	449057	-986281	7.91243e+06	1.18775e+06	-2.28511e+07	1.70014e+06	1.85284e+07	1.07132	0.963379	0.993409	0	6	1.45769	1.44317	0.993409	0	6
1.61024	5.97679	8.87742	-0.553967	4.78401	0.675441	6.192	-3.24371e+62	6.97081e+59	-5.18822e+62	4.85684e+61	-3.89751e+62	-2.24866e+62	2.63812e+61	1.07236	0.959883	0.959883	0	6	0.999501	0.916266	0.916266	0	6		1.73536	5.84207	8.60751	-0.61731	4.78367	0.698369	5.73136	680653	-1.25397e+06	6.10007e+06	1.64516e+06	-2.26161e+07	1.60268e+06	1.95555e+07	1.07236	0.959883	0.993409	0	6	1.45769	1.44317	0.993409	0	6
1.7877	5.60118	8.13109	-0.816138	4.94416	0.74371	4.89096	6.61294e+62	1.58369e+63	1.96499e+63	-1.5375e+62	-4.53347e+62	-1.22096e+62	8.47568e+63	1.07153	0.966382	0.966382	0	6	1.45769	0.966143	0.966143	0	6		1.56646	5.83865	8.62596	-0.715484	4.94851	0.676697	5.79912	884676	-1.46706e+06	4.21845e+06	2.13533e+06	-2.23785e+07	1.5124e+06	2.02564e+07	1.07153	0.966382	0.993409	0	6	1.45769	1.44317	0.993409	0	6
1.84094	5.63389	7.72364	-0.734839	4.97493	0.807176	4.86742	-2.18183e+63	2.94705e+63	6.02164e+63	2.61978e+63	-4.63326e+62	-1.79078e+63	1.38842e+64	1.07034	0.968152	0.968152	0	6	1.08587	0.992293	0.992293	0	6		1.57739	5.88288	8.25987	-0.613416	4.98166	0.730016	5.81915	1.06376e+06	-1.63903e+06	2.32396e+06	2.6504e+06	-2.21367e+07	1.43421e+06	2.06504e+07	1.07034	0.968152	0.993409	0	6	1.45769	1.44317	0.993409	0	6
1.84934	4.99257	8.22903	-0.790984	4.97626	0.770517	5.0289	-2.63539e+63	-9.86491e+63	-9.89905e+63	3.44521e+63	6.45367e+62	-1.77703e+63	0	1.07158	0.966211	0.966211	0	6	1.45769	0.966143	0.966143	0	6		1.66431	5.18399	8.62694	-0.705879	4.98001	0.717256	5.74608	1.22032e+06	-1.78041e+06	466038	3.18284e+06	-2.18896e+07	1.37168e+06	2.07627e+07	1.07158	0.966211	0.993409	0	6	1.45769	1.44317	0.993409	0	6
1.97878	5.09535	6.85338	-0.867342	4.95014	0.771245	4.68899	-5.39295e+63	1.15896e+61	-8.62587e+63	8.07492e+62	-6.47995e+63	-3.7386e+63	4.38611e+62	1.06924	0.967736	0.967736	0	6	0.999501	0.916266	0.916266	0	6		1.64372	5.43382	7.61268	-0.715392	4.9584	0.65895	6.10279	1.35652e+06	-1.89934e+06	-1.31335e+06	3.72555e+06	-2.16357e+07	1.32723e+06	2.06219e+07	1.06924	0.967736	0.993409	0	6	1.45769	1.44317	0.993409	0	6
1.85579	5.2773	6.41708	-0.692966	4.9181	0.723839	5.00295	1.09946e+64	2.63303e+64	3.26697e+64	-2.55623e+63	-7.5373e+63	-2.02996e+63	1.40916e+65	1.07069	0.968082	0.968082	0	6	1.45769	0.966143	0.966143	0	6		1.66175	5.5151	6.92443	-0.60937	4.9218	0.650133	5.99764	1.47427e+06	-2.00196e+06	-2.97967e+06	4.27197e+06	-2.1374e+07	1.30225e+06	2.02582e+07	1.07069	0.968082	0.993409	0	6	1.45769	1.44317	0.993409	0	6
1.68229	5.99467	7.03889	-1.00547	5.24758	0.748229	5.35726	-3.62748e+64	4.89973e+64	1.00115e+65	4.35561e+64	-7.70319e+63	-2.97733e+64	2.30838e+65	1.07191	0.966017	0.966017	0	6	1.08587	0.992293	0.992293	0	6		1.66056	6.10028	7.26337	-1.00441	5.24617	0.714677	5.90629	1.57527e+06	-2.09278e+06	-4.50556e+06	4.81615e+06	-2.11035e+07	1.29729e+06	1.9702e+07	1.07191	0.966017	0.993409	0	6	1.45769	1.44317	0.993409	0	6
1.81156	6.86641	7.062	-0.924368	4.94199	0.705082	5.34898	-4.38156e+64	-1.64013e+65	-1.6458e+65	5.72796e+64	1.07298e+64	-2.95447e+64	0	1.07249	0.968971	0.968971	0	6	1.45769	0.966143	0.966143	0	6		1.74694	6.96827	7.27212	-0.89947	4.94284	0.673742	5.78977	1.661e+06	-2.175e+06	-5.87036e+06	5.3527e+06	-2.08233e+07	1.31222e+06	1.89828e+07	1.07249	0.968971	0.993409	0	6	1.45769	1.44317	0.993409	0	6
1.71933	6.85088	5.93076	-0.804198	5.01516	0.694185	5.50057	-8.96625e+64	1.92687e+62	-1.43413e+65	1.34253e+64	-1.07735e+65	-6.21575e+64	7.29229e+63	1.07073	0.969368	0.969368	0	6	0.999501	0.916266	0.916266	0	6		1.68825	6.85803	5.94469	-0.787612	5.01647	0.692544	5.4844	1.73275e+06	-2.25082e+06	-7.05945e+06	5.87685e+06	-2.05329e+07	1.34634e+06	1.81284e+07	1.07073	0.969368	0.993409	0	6	1.45769	1.44317	0.993409	0	6
1.41855	6.29609	5.15695	-0.676466	4.97727	0.635625	6.03555	1.82795e+65	4.37764e+65	5.43162e+65	-4.24996e+64	-1.25314e+65	-3.37499e+64	2.34285e+66	1.06866	0.968643	0.968643	0	6	1.45769	0.966143	0.966143	0	6		1.64919	6.14311	4.80471	-0.788892	4.96955	0.688302	5.50487	1.79165e+06	-2.32162e+06	-8.06364e+06	6.38445e+06	-2.02317e+07	1.3985e+06	1.71648e+07	1.06866	0.968643	0.993409	0	6	1.45769	1.44317	0.993409	0	6
1.90513	6.17101	6.13554	-0.696355	4.95809	0.669425	5.94608	-6.031e+65	8.14623e+65	1.6645e+66	7.24159e+65	-1.28072e+65	-4.95006e+65	3.83788e+66	1.06929	0.968815	0.968815	0	6	1.08587	0.992293	0.992293	0	6		2.09538	6.08921	5.94941	-0.794003	4.95083	0.6959	5.78219	1.8387e+06	-2.3882e+06	-8.87842e+06	6.87187e+06	-1.99193e+07	1.46724e+06	1.61157e+07	1.06929	0.968815	0.993409	0	6	1.45769	1.44317	0.993409	0	6
2.53248	6.57225	4.90052	-0.625807	4.93672	0.668899	5.76237	-7.28473e+65	-2.72686e+66	-2.73629e+66	9.52324e+65	1.78392e+65	-4.91207e+65	0	1.06899	0.968709	0.968709	0	6	1.45769	0.966143	0.966143	0	6		2.65813	6.55597	4.85679	-0.694435	4.9311	0.674181	5.86148	1.87476e+06	-2.45091e+06	-9.50331e+06	7.33603e+06	-1.95955e+07	1.55084e+06	1.50025e+07	1.06899	0.968709	0.993409	0	6	1.45769	1.44317	0.993409	0	6
1.98854	6.81674	5.53291	-0.513158	4.87549	0.591586	6.40041	-1.49072e+66	3.20359e+63	-2.38436e+66	2.23207e+65	-1.79119e+66	-1.03342e+66	1.21241e+65	1.07077	0.967864	0.967864	0	6	0.999501	0.916266	0.916266	0	6		2.55383	6.50667	4.88121	-0.798878	4.85656	0.676814	5.66779	1.9006e+06	-2.50976e+06	-9.9412e+06	7.77436e+06	-1.92604e+07	1.64744e+06	1.38439e+07	1.07077	0.967864	0.993409	0	6	1.45769	1.44317	0.993409	0	6
2.44937	6.441	3.91188	-0.811208	4.92667	0.720803	5.1608	3.03912e+66	7.27822e+66	9.03054e+66	-7.06593e+65	-2.08346e+66	-5.61121e+65	3.89519e+67	1.08643	0.973769	0.973769	0	6	1.45769	0.966143	0.966143	0	6		2.61309	6.35461	3.89225	-0.89453	4.92213	0.707701	5.39563	1.91692e+06	-2.56458e+06	-1.01977e+07	8.18474e+06	-1.89139e+07	1.75509e+06	1.26568e+07	1.08643	0.973769	0.993409	0	6	1.45769	1.44317	0.993409	0	6
2.46783	6.81799	3.91703	-0.82813	5.0522	0.807974	4.91626	-1.00271e+67	1.35438e+67	2.76738e+67	1.20398e+67	-2.12931e+66	-8.22992e+66	6.38081e+67	1.10004	0.977923	0.977923	0	6	1.08587	0.992293	0.992293	0	6		2.59459	6.75498	3.98217	-0.893252	5.04908	0.780024	5.31071	1.92435e+06	-2.61504e+06	-1.02807e+07	8.56547e+06	-1.85564e+07	1.87179e+06	1.14557e+07	1.10004	0.977923	0.993409	0	6	1.45769	1.44317	0.993409	0	6
2.58521	6.8095	3.76669	-0.952951	4.96059	0.745967	4.72531	-1.21115e+67	-4.53364e+67	-4.54933e+67	1.58332e+67	2.96593e+66	-8.16674e+66	0	1.10833	0.980701	0.980701	0	6	1.45769	0.966143	0.966143	0	6		2.63912	6.7982	3.84416	-0.982446	4.95906	0.725002	5.02414	1.92346e+06	-2.66075e+06	-1.01998e+07	8.91524e+06	-1.81881e+07	1.99557e+06	1.02529e+07	1.10833	0.980701	0.993409	0	6	1.45769	1.44317	0.993409	0	6
2.02152	6.74621	4.23089	-0.837351	5.00035	0.74914	4.92317	-2.47845e+67	5.32625e+64	-3.96421e+67	3.71101e+66	-2.97801e+67	-1.71815e+67	2.01573e+66	1.11583	0.981178	0.981178	0	6	0.999501	0.916266	0.916266	0	6		2.10573	6.64614	4.20562	-0.874496	4.99994	0.736876	5.00797	1.91479e+06	-2.70132e+06	-9.96576e+06	9.23308e+06	-1.78094e+07	2.1245e+06	9.05916e+06	1.11583	0.981178	0.993409	0	6	1.45769	1.44317	0.993409	0	6
2.25918	6.68739	4.23668	-1.05516	5.08571	0.676159	4.8542	5.05281e+67	1.21007e+68	1.50141e+68	-1.17477e+67	-3.46393e+67	-9.32913e+66	6.47609e+68	1.10353	0.979161	0.979161	0	6	1.45769	0.966143	0.966143	0	6		2.28568	6.69526	4.29561	-1.07108	5.0846	0.663237	5.05538	1.89885e+06	-2.73632e+06	-9.59037e+06	9.51835e+06	-1.74209e+07	2.2567e+06	7.88345e+06	1.10353	0.979161	0.993409	0	6	1.45769	1.44317	0.993409	0	6
1.77939	7.56993	4.61831	-0.823413	5.05939	0.665089	5.42971	-1.66709e+68	2.25178e+68	4.60101e+68	2.00172e+68	-3.54017e+67	-1.3683e+68	1.06086e+69	1.10805	0.976219	0.976219	0	6	1.08587	0.992293	0.992293	0	6		2.12973	7.12213	4.27892	-0.973282	5.05701	0.664312	5.16056	1.87613e+06	-2.76542e+06	-9.08596e+06	9.77067e+06	-1.70232e+07	2.39043e+06	6.73327e+06	1.10805	0.976219	0.993409	0	6	1.45769	1.44317	0.993409	0	6
1.83427	7.04564	4.53072	-0.960747	5.06725	0.642627	5.24806	-2.01364e+68	-7.53757e+68	-7.56365e+68	2.63241e+68	4.93111e+67	-1.35779e+68	0	1.10829	0.979124	0.979124	0	6	1.45769	0.966143	0.966143	0	6		2.08355	6.66885	4.22563	-1.06151	5.06733	0.646807	4.89334	1.84709e+06	-2.78828e+06	-8.46517e+06	9.98992e+06	-1.66169e+07	2.52402e+06	5.6148e+06	1.10829	0.979124	0.993409	0	6	1.45769	1.44317	0.993409	0	6
1.9318	6.96462	5.061	-0.844639	5.08437	0.619955	5.32655	-4.12063e+68	8.85535e+65	-6.59084e+68	6.16987e+67	-4.95119e+68	-2.85658e+68	3.35133e+67	1.11248	0.977588	0.977588	0	6	0.999501	0.916266	0.916266	0	6		2.21754	6.56627	4.77504	-0.963628	5.08364	0.615763	5.08593	1.81219e+06	-2.80468e+06	-7.74071e+06	1.01762e+07	-1.62028e+07	2.65594e+06	4.53308e+06	1.11248	0.977588	0.993409	0	6	1.45769	1.44317	0.993409	0	6
1.9581	6.76259	5.78878	-0.921721	5.07465	0.664387	5.13868	8.40073e+68	2.01184e+69	2.49622e+69	-1.95316e+68	-5.75909e+68	-1.55105e+68	1.07671e+70	1.10679	0.978818	0.978818	0	6	1.45769	0.966143	0.966143	0	6		2.03256	6.66571	5.72379	-0.953502	5.07428	0.662148	5.1009	1.77188e+06	-2.81444e+06	-6.92523e+06	1.03298e+07	-1.57816e+07	2.7848e+06	3.49215e+06	1.10679	0.978818	0.993409	0	6	1.45769	1.44317	0.993409	0	6
2.07639	6.89597	4.13075	-1.00683	5.08922	0.692691	5.26095	-2.77168e+69	3.74378e+69	7.64958e+69	3.32803e+69	-5.88585e+68	-2.27491e+69	1.76378e+70	1.09357	0.975033	0.975033	0	6	1.08587	0.992293	0.992293	0	6		2.17343	6.80157	4.04969	-1.05135	5.08755	0.694394	5.21831	1.72658e+06	-2.81744e+06	-6.03109e+06	1.04513e+07	-1.53543e+07	2.90931e+06	2.49518e+06	1.09357	0.975033	0.993409	0	6	1.45769	1.44317	0.993409	0	6
1.98426	7.29313	4.20877	-0.905574	5.10175	0.69682	5.84974	-3.34786e+69	-1.25319e+70	-1.25752e+70	4.37661e+69	8.1984e+68	-2.25745e+69	0	1.09164	0.972592	0.972592	0	6	1.45769	0.966143	0.966143	0	6		2.30223	6.94278	3.7943	-1.04638	5.09662	0.730878	5.31648	1.67673e+06	-2.81366e+06	-5.07031e+06	1.05411e+07	-1.49215e+07	3.02833e+06	1.5446e+06	1.09164	0.972592	0.993409	0	6	1.45769	1.44317	0.993409	0	6
1.85368	7.21516	5.00875	-0.909768	5.02319	0.742671	6.20123	-6.85092e+69	1.47228e+67	-1.09579e+70	1.0258e+69	-8.23179e+69	-4.74932e+69	5.57188e+68	1.08358	0.97073	0.97073	0	6	0.999501	0.916266	0.916266	0	6		2.36461	6.75688	4.36722	-1.14629	5.01115	0.809642	5.39934	1.62276e+06	-2.80313e+06	-4.05443e+06	1.06002e+07	-1.44843e+07	3.14085e+06	642206	1.08358	0.97073	0.993409	0	6	1.45769	1.44317	0.993409	0	6
1.76963	7.22239	5.14206	-1.04267	5.00524	0.999814	5.81285	1.3967e+70	3.34486e+70	4.15018e+70	-3.2473e+69	-9.57499e+69	-2.57876e+69	1.79012e+71	1.0865	0.968877	0.968877	0	6	1.45769	0.966143	0.966143	0	6		1.97276	7.04395	4.90429	-1.13711	5.00042	1.02313	5.53949	1.56508e+06	-2.78593e+06	-2.99449e+06	1.06294e+07	-1.40435e+07	3.24599e+06	0	1.0865	0.968877	0.993409	0	6	1.45769	1.44317	0.993409	0	6
1.70247	7.74034	5.32572	-1.20875	4.83908	1.84918	5.37269	-4.60815e+70	6.22436e+70	1.27181e+71	5.53314e+70	-9.78573e+69	-3.78224e+70	2.93244e+71	1.0749	0.966653	0.966653	0	6	1.08587	0.992293	0.992293	0	6		1.74701	7.76414	5.38469	-1.23623	4.83648	1.83888	5.60273	-7.19294e+06	2.47906e+07	1.00648e+07	303182	-3.69344e+07	-3.42599e+06	1.31956e+06	1.0749	0.966653	0.993409	0	6	0.999501	0.977946	0.977946	0	6
2.99522	6.44405	2.92265	-1.84444	4.99396	1.19477	2.84051	-5.5661e+70	-2.08353e+71	-2.09074e+71	7.2765e+70	1.36306e+70	-3.7532e+70	0	1.0826	0.965217	0.965217	0	6	1.45769	0.966143	0.966143	0	6		1.64985	7.61299	4.79373	-1.21979	5.02874	0.967592	5.44322	-6.32839e+06	1.94234e+07	1.17937e+07	58230.5	-3.66248e+07	-2.36992e+06	0	1.0826	0.965217	0.993409	0	6	1.45769	1.44317	0.993409	0	6
1.71722	8.59477	4.75848	-1.04325	5.0113	0.852953	6.02391	-1.13902e+71	2.44779e+68	-1.82184e+71	1.70548e+70	-1.36861e+71	-7.89616e+70	9.26374e+69	1.07439	0.963938	0.963938	0	6	0.999501	0.916266	0.916266	0	6		1.86237	8.43162	4.42654	-1.10625	5.00795	0.901813	5.4002	-7.5428e+06	2.15797e+07	3.04671e+07	1.43504e+06	-3.33309e+07	-1.05042e+07	4.69073e+06	1.07439	0.963938	0.993409	0	6	0.999501	0.977946	0.977946	0	6
1.60184	9.32647	5.78463	-0.838428	5.01572	0.58353	7.25922	2.32213e+71	5.56113e+71	6.90004e+71	-5.39893e+70	-1.59193e+71	-4.28741e+70	2.97623e+72	1.06152	0.964197	0.964197	0	6	1.45769	0.966143	0.966143	0	6		2.32624	8.91427	4.55876	-1.19455	4.98703	0.794574	5.25541	-6.86442e+06	1.73801e+07	3.02199e+07	1.08116e+06	-3.29843e+07	-9.73088e+06	0	1.06152	0.964197	0.993409	0	6	1.45769	1.44317	0.993409	0	6
0.77193	8.09777	7.13819	-0.685074	5.03203	0.623646	8.6568	-7.66146e+71	1.03485e+72	2.11449e+72	9.19933e+71	-1.62696e+71	-6.2883e+71	4.87544e+72	1.05673	0.960565	0.960565	0	6	1.08587	0.992293	0.992293	0	6		2.15149	7.52845	4.9544	-1.38473	4.97022	1.02774	5.22006	-7.47932e+06	2.49575e+07	3.99741e+07	1.9777e+06	-3.4086e+07	-1.5522e+07	4.45935e+06	1.05673	0.960565	0.993409	0	6	0.999501	0.977946	0.977946	0	6
1.64291	7.90007	5.99213	-0.691758	5.02654	0.41022	8.07075	-9.25414e+71	-3.46405e+72	-3.47604e+72	1.20978e+72	2.2662e+71	-6.24003e+71	0	1.04972	0.952026	0.952026	0	6	1.45769	0.966143	0.966143	0	6		2.60374	7.69457	4.59945	-1.19813	4.97713	0.694617	5.99966	-7.00767e+06	2.02528e+07	3.85457e+07	1.52124e+06	-3.37408e+07	-1.46931e+07	0	1.04972	0.952026	0.993409	0	6	1.45769	1.44317	0.993409	0	6
0.603877	7.79409	7.42698	-0.186733	5.04675	0.226333	9.95308	-1.89373e+72	4.06967e+69	-3.02897e+72	2.8355e+71	-2.27543e+72	-1.31281e+72	1.54018e+71	1.04353	0.957686	0.957686	0	6	0.999501	0.916266	0.916266	0	6		2.43918	7.75401	4.80387	-1.18857	4.93929	0.820884	6.06273	-6.98966e+06	2.98784e+07	4.57578e+07	2.21819e+06	-3.67473e+07	-1.95352e+07	4.67574e+06	1.04353	0.957686	0.993409	0	6	0.999501	0.977946	0.977946	0	6
0.195016	7.27605	6.94641	-0.000235598	5.10007	0.0438873	10.4269	3.86074e+72	9.24587e+72	1.14719e+73	-8.97619e+71	-2.64672e+72	-7.12819e+71	4.94824e+73	1.03751	0.960771	0.960771	0	6	1.45769	0.966143	0.966143	0	6		2.30331	7.63382	4.05797	-1.19087	4.96216	0.766971	6.25121	-6.74427e+06	2.42174e+07	4.31713e+07	1.71378e+06	-3.64175e+07	-1.85735e+07	0	1.03751	0.960771	0.993409	0	6	1.45769	1.44317	0.993409	0	6
0.22794	7.0134	6.44528	0.210586	5.11343	-0.0975281	10.7301	-1.27378e+73	1.72053e+73	3.51553e+73	1.52947e+73	-2.70497e+72	-1.04549e+73	8.10584e+73	1.03737	0.960867	0.960867	0	6	1.08587	0.992293	0.992293	0	6		2.52536	7.43612	3.34384	-1.09033	4.96226	0.68516	6.29956	-6.17031e+06	3.47456e+07	4.97264e+07	2.37512e+06	-4.04328e+07	-2.29383e+07	5.02303e+06	1.03737	0.960867	0.993409	0	6	0.999501	0.977946	0.977946	0	6
0.13738	7.49046	7.44628	0.0708717	5.09361	-0.119495	10.9978	-1.53858e+73	-5.75929e+73	-5.77923e+73	2.01137e+73	3.76776e+72	-1.03746e+73	0	1.04025	0.960054	0.960054	0	6	1.45769	0.966143	0.966143	0	6		2.54513	7.86704	4.17563	-1.28669	4.93778	0.692713	6.30985	-6.15895e+06	2.8054e+07	4.60396e+07	1.85722e+06	-4.01192e+07	-2.18344e+07	0	1.04025	0.960054	0.993409	0	6	1.45769	1.44317	0.993409	0	6
0.0228265	7.11539	5.92547	0.153435	5.06192	-0.163827	11.175	-3.14849e+73	6.76619e+70	-5.03592e+73	4.71427e+72	-3.7831e+73	-2.18265e+73	2.56068e+72	1.03614	0.962916	0.962916	0	6	0.999501	0.916266	0.916266	0	6		2.56413	7.54977	2.48755	-1.28199	4.8958	0.698609	6.25662	-5.17175e+06	3.92666e+07	5.25483e+07	2.5237e+06	-4.49365e+07	-2.59015e+07	5.40297e+06	1.03614	0.962916	0.993409	0	6	0.999501	0.977946	0.977946	0	6
0.228402	6.74907	5.48855	0.169066	5.09056	-0.0593976	11.2218	6.41882e+73	1.53721e+74	1.90731e+74	-1.49237e+73	-4.4004e+73	-1.18512e+73	8.22688e+74	1.03642	0.962276	0.962276	0	6	1.45769	0.966143	0.966143	0	6		2.7973	7.1953	2.0674	-1.28298	4.9228	0.800827	6.39349	-5.3868e+06	3.15556e+07	4.78602e+07	2.01473e+06	-4.4634e+07	-2.46582e+07	0	1.03642	0.962276	0.993409	0	6	1.45769	1.44317	0.993409	0	6
0.435883	5.77802	4.30628	0.111556	5.1048	0.181735	10.9153	-2.11778e+74	2.86054e+74	5.84488e+74	2.54288e+74	-4.49725e+73	-1.73821e+74	1.34767e+75	1.03647	0.96209	0.96209	0	6	1.08587	0.992293	0.992293	0	6		2.90409	6.25452	1.13372	-1.28891	4.94269	0.989395	6.57677	-4.14411e+06	4.35084e+07	5.46753e+07	2.68991e+06	-5.02247e+07	-2.8584e+07	5.81501e+06	1.03647	0.96209	0.993409	0	6	0.999501	0.977946	0.977946	0	6
0.782088	6.54156	2.98457	0.114993	5.07393	0.262132	9.58167	-2.55803e+74	-9.57533e+74	-9.60847e+74	3.34408e+74	6.26422e+73	-1.72487e+74	0	1.03912	0.959222	0.959222	0	6	1.45769	0.966143	0.966143	0	6		2.7617	6.91802	0.745929	-1.00962	4.94653	0.836596	6.91776	-4.56512e+06	3.47961e+07	4.91029e+07	2.20298e+06	-4.99255e+07	-2.72021e+07	0	1.03912	0.959222	0.993409	0	6	1.45769	1.44317	0.993409	0	6
1.3091	6.02635	1.75734	-0.108539	5.06213	0.42971	8.65555	-5.23464e+74	1.12494e+72	-8.37266e+74	7.83789e+73	-6.28974e+74	-3.62885e+74	4.25736e+73	1.05449	0.964653	0.964653	0	6	0.999501	0.916266	0.916266	0	6		2.96616	5.80016	-0.228258	-0.998716	4.97588	0.840144	6.18818	-3.20847e+06	4.76332e+07	5.65293e+07	2.88923e+06	-5.62962e+07	-3.11624e+07	6.28165e+06	1.05449	0.964653	0.993409	0	6	0.999501	0.977946	0.977946	0	6
2.04911	5.09532	0.0786644	-0.456306	5.03704	0.522105	7.00817	1.06719e+75	2.55574e+75	3.17107e+75	-2.4812e+74	-7.31604e+74	-1.97037e+74	1.36779e+76	1.07082	0.968729	0.968729	0	6	1.45769	0.966143	0.966143	0	6		2.93096	4.67249	-0.793548	-0.90195	5.00414	0.644859	6.21609	-3.80743e+06	3.79231e+07	5.0186e+07	2.42938e+06	-5.59905e+07	-2.96379e+07	0	1.07082	0.968729	0.993409	0	6	1.45769	1.44317	0.993409	0	6
1.82888	5.73752	-0.845252	-0.356083	5.01421	0.564328	6.63331	-3.52099e+75	4.7559e+75	9.71763e+75	4.22775e+75	-7.47707e+74	-2.88993e+75	2.24061e+76	1.07754	0.971262	0.971262	0	6	1.08587	0.992293	0.992293	0	6		2.75764	5.2246	-1.53243	-0.821378	4.98429	0.625256	6.42665	-2.4506e+06	5.18379e+07	5.85027e+07	3.13348e+06	-6.31645e+07	-3.3821e+07	6.82656e+06	1.07754	0.971262	0.993409	0	6	0.999501	0.977946	0.977946	0	6
2.35114	5.52242	-2.43948	-0.751903	4.9749	0.945193	4.85629	-4.25294e+75	-1.59198e+76	-1.59749e+76	5.55982e+75	1.04148e+75	-2.86774e+75	0	1.09837	0.97769	0.97769	0	6	1.45769	0.966143	0.966143	0	6		2.6766	5.33012	-2.30346	-0.916617	4.96801	0.874311	5.79143	-3.19705e+06	4.11081e+07	5.14819e+07	2.69893e+06	-6.28418e+07	-3.21444e+07	0	1.09837	0.97769	0.993409	0	6	1.45769	1.44317	0.993409	0	6
2.76957	4.13203	-3.89789	-0.729229	5.06175	0.723364	3.48686	-8.70304e+75	1.87031e+73	-1.39203e+76	1.30312e+75	-1.04572e+76	-6.03328e+75	7.07823e+74	1.13919	0.992026	0.992026	0	6	0.999501	0.916266	0.916266	0	6		2.58214	4.93355	-3.04689	-0.707201	5.04667	0.662986	5.35881	-1.9217e+06	5.633e+07	6.09399e+07	3.43198e+06	-7.08604e+07	-3.67392e+07	7.47065e+06	1.13919	0.992026	0.993409	0	6	0.999501	0.977946	0.977946	0	6
3.21368	3.56222	-4.49991	-0.637532	5.08806	0.842574	2.97306	1.77429e+76	4.24914e+76	5.27217e+76	-4.12521e+75	-1.21636e+76	-3.27592e+75	2.27407e+77	1.13926	0.995451	0.995451	0	6	1.45769	0.966143	0.966143	0	6		2.93179	4.78835	-3.45891	-0.603395	5.06224	0.814571	5.14381	-2.78694e+06	4.45277e+07	5.33036e+07	3.01566e+06	-7.05101e+07	-3.48951e+07	0	1.13926	0.995451	0.993409	0	6	1.45769	1.44317	0.993409	0	6
3.3033	3.42219	-4.3847	-0.316209	5.10225	0.699743	2.75765	-5.85396e+76	7.9071e+76	1.61564e+77	7.02901e+76	-1.24313e+76	-4.80476e+76	3.72522e+77	1.14201	0.996574	0.996574	0	6	1.08587	0.992293	0.992293	0	6		3.03221	4.79301	-3.30014	-0.300634	5.07017	0.689278	5.04199	-1.64262e+06	6.13142e+07	6.41252e+07	3.79202e+06	-7.94359e+07	-4.00822e+07	8.23163e+06	1.14201	0.996574	0.993409	0	6	0.999501	0.977946	0.977946	0	6
3.46169	1.67561	-4.69903	-0.153615	5.01764	1.05271	2.75227	-7.07089e+76	-2.64681e+77	-2.65597e+77	9.24369e+76	1.73156e+76	-4.76787e+76	0	1.11894	0.970029	0.970029	0	6	1.45769	0.966143	0.966143	0	6		3.46945	2.17698	-3.92066	-0.207186	5.00289	0.96229	4.77497	-2.60282e+06	4.83524e+07	5.58979e+07	3.38307e+06	-7.9048e+07	-3.80497e+07	0	1.11894	0.970029	0.993409	0	6	1.45769	1.44317	0.993409	0	6
3.63922	4.33953	-4.87297	0.159545	5.12446	0.835893	2.0571	-1.44696e+77	3.10955e+74	-2.31437e+77	2.16655e+76	-1.73861e+77	-1.00309e+77	1.17682e+76	1.11622	0.970459	0.970459	0	6	0.999501	0.916266	0.916266	0	6		3.67687	5.13954	-3.61358	0.0587266	5.10017	0.683906	5.37969	-1.60985e+06	6.69834e+07	6.82804e+07	4.21933e+06	-8.89672e+07	-4.39959e+07	9.12453e+06	1.11622	0.970459	0.993409	0	6	0.999501	0.977946	0.977946	0	6
3.02821	3.80172	-5.21259	0.357742	5.20458	0.928339	1.97355	2.94991e+77	7.06457e+77	8.76545e+77	-6.85852e+76	-2.0223e+77	-5.4465e+76	3.78085e+78	1.16097	0.93748	0.93748	0	6	1.45769	0.966143	0.966143	0	6		3.06614	4.11191	-4.59434	0.303997	5.1953	0.835899	3.65207	-2.64808e+06	5.27391e+07	5.94462e+07	3.80456e+06	-8.85322e+07	-4.1749e+07	0	1.16097	0.93748	0.993409	0	6	1.45769	1.44317	0.993409	0	6
2.96558	2.72368	-5.11182	0.583181	5.17728	1.03614	1.18108	-9.73272e+77	1.31462e+78	2.68614e+78	1.16863e+78	-2.06681e+77	-7.98833e+77	6.1935e+78	1.2036	0.924166	0.924166	0	6	1.08587	0.992293	0.992293	0	6		3.01844	3.19053	-4.27377	0.504195	5.1626	0.898798	3.4812	-1.8023e+06	7.35142e+07	7.3569e+07	4.71863e+06	-9.95557e+07	-4.86064e+07	1.01624e+07	1.2036	0.924166	0.993409	0	6	0.999501	0.977946	0.977946	0	6
2.78119	2.53858	-4.08613	0.619046	5.22386	1.04238	0.421659	-1.1756e+78	-4.40055e+78	-4.41578e+78	1.53684e+78	2.87886e+77	-7.92701e+77	0	1.21818	0.930435	0.930435	0	6	1.45769	0.966143	0.966143	0	6		2.84162	3.13349	-3.00184	0.503184	5.21011	0.774558	3.5287	-2.90952e+06	5.7829e+07	6.40725e+07	4.2838e+06	-9.90647e+07	-4.61137e+07	0	1.21818	0.930435	0.993409	0	6	1.45769	1.44317	0.993409	0	6
3.00605	2.93465	-3.4358	0.61556	5.28954	0.999312	0.63757	-2.40569e+78	5.1699e+75	-3.84784e+78	3.60207e+77	-2.89059e+78	-1.66772e+78	1.95656e+77	1.22864	0.934648	0.934648	0	6	0.999501	0.916266	0.916266	0	6		3.04899	3.46675	-2.47397	0.510116	5.27992	0.734151	3.42476	-2.18806e+06	8.10662e+07	8.01062e+07	5.29431e+06	-1.11329e+08	-5.40207e+07	1.13576e+07	1.22864	0.934648	0.993409	0	6	0.999501	0.977946	0.977946	0	6
2.6853	3.36425	-2.34055	0.6099	5.32341	0.903816	0.811732	4.90448e+78	1.17455e+79	1.45733e+79	-1.14029e+78	-3.36225e+78	-9.05528e+77	6.28599e+79	1.22697	0.933996	0.933996	0	6	1.45769	0.966143	0.966143	0	6		2.72603	3.83216	-1.48176	0.517487	5.31443	0.676971	3.28697	-3.36335e+06	6.37472e+07	6.98553e+07	4.82504e+06	-1.10773e+08	-5.12465e+07	0	1.22697	0.933996	0.993409	0	6	1.45769	1.44317	0.993409	0	6
2.91588	4.11317	-1.69182	0.819756	5.35736	0.909844	0.699189	-1.61815e+79	2.18568e+79	4.46595e+79	1.94296e+79	-3.43625e+78	-1.32813e+79	1.02972e+80	1.22776	0.934266	0.934266	0	6	1.08587	0.992293	0.992293	0	6		2.95058	4.56954	-0.879667	0.728252	5.34962	0.673027	3.07164	-2.73056e+06	8.97847e+07	8.79721e+07	5.95095e+06	-1.24439e+08	-6.03319e+07	1.27221e+07	1.22776	0.934266	0.993409	0	6	0.999501	0.977946	0.977946	0	6
2.98799	3.00588	-0.911593	0.758949	5.4052	1.29052	0	-1.95453e+79	-7.3163e+79	-7.34163e+79	2.55514e+79	4.78636e+78	-1.31793e+79	0	1.19898	0.923252	0.923252	0	6	1.45769	0.966143	0.966143	0	6		3.03181	3.50338	0.00404709	0.643562	5.39918	0.954238	2.69255	-3.98064e+06	7.06054e+07	7.68418e+07	5.43345e+06	-1.23812e+08	-5.72358e+07	0	1.19898	0.923252	0.993409	0	6	1.45769	1.44317	0.993409	0	6
3.07161	3.29875	0.655148	0.759991	5.41756	1.13636	0	-3.99968e+79	8.59541e+76	-6.39737e+79	5.98876e+78	-4.80585e+79	-2.77273e+79	3.25296e+78	1.21156	0.927655	0.927655	0	6	0.999501	0.916266	0.916266	0	6		3.12263	3.88658	1.72882	0.632124	5.40871	0.785054	3.16022	-3.39365e+06	9.98054e+07	9.72261e+07	6.69391e+06	-1.39067e+08	-6.76241e+07	1.42694e+07	1.21156	0.927655	0.993409	0	6	0.999501	0.977946	0.977946	0	6
3.37648	4.10447	1.13897	0.740809	5.45712	0.999775	0.423147	8.15413e+79	1.95279e+80	2.42294e+80	-1.89583e+79	-5.59003e+79	-1.50552e+79	1.0451e+81	1.21113	0.92749	0.92749	0	6	1.45769	0.966143	0.966143	0	6		3.41948	4.57445	2.0124	0.639751	5.44953	0.729117	3.00429	-4.73208e+06	7.85065e+07	8.5063e+07	6.11532e+06	-1.3836e+08	-6.41612e+07	0	1.21113	0.92749	0.993409	0	6	1.45769	1.44317	0.993409	0	6
3.43162	3.91156	1.35597	0.633268	5.5142	0.850475	0.679032	-2.69031e+80	3.63388e+80	7.42503e+80	3.23034e+80	-5.71307e+79	-2.20813e+80	1.71201e+81	1.21274	0.928173	0.928173	0	6	1.08587	0.992293	0.992293	0	6		3.4626	4.282	2.0404	0.552476	5.50903	0.626603	2.71704	-4.14552e+06	1.11261e+08	1.07921e+08	7.52976e+06	-1.55416e+08	-7.59787e+07	1.60148e+07	1.21274	0.928173	0.993409	0	6	0.999501	0.977946	0.977946	0	6
3.76831	5.33293	2.13005	0.599809	5.50828	0.726448	1.47045	-3.24958e+80	-1.2164e+81	-1.22061e+81	4.24814e+80	7.95774e+79	-2.19118e+80	0	1.22437	0.932866	0.932866	0	6	1.45769	0.966143	0.966143	0	6		3.79512	5.57757	2.6158	0.552364	5.50269	0.621767	2.83614	-5.5916e+06	8.75504e+07	9.45474e+07	6.87825e+06	-1.54621e+08	-7.20995e+07	0	1.22437	0.932866	0.993409	0	6	1.45769	1.44317	0.993409	0	6
3.7987	3.04685	2.30051	0.598101	5.53145	0.787808	1.57665	-6.64981e+80	1.42906e+78	-1.06362e+81	9.95684e+79	-7.99015e+80	-4.6099e+80	5.40832e+79	1.22275	0.93222	0.93222	0	6	0.999501	0.916266	0.916266	0	6		3.81451	3.19055	2.58513	0.570186	5.52816	0.726081	2.37753	-4.96125e+06	1.24286e+08	1.20118e+08	8.46666e+06	-1.73716e+08	-8.5481e+07	1.79763e+07	1.22275	0.93222	0.993409	0	6	0.999501	0.977946	0.977946	0	6
3.40296	4.15323	3.51806	0.77526	5.50932	0.741276	1.72682	1.3557e+81	3.24668e+81	4.02836e+81	-3.15198e+80	-9.29392e+80	-2.50306e+80	1.73757e+82	1.22232	0.932036	0.932036	0	6	1.45769	0.966143	0.966143	0	6		3.4447	4.39928	4.10565	0.732306	5.50085	0.686952	3.27225	-6.53897e+06	9.78396e+07	1.05334e+08	7.73132e+06	-1.72825e+08	-8.1131e+07	0	1.22232	0.932036	0.993409	0	6	1.45769	1.44317	0.993409	0	6
4.3079	4.20125	1.66006	1.40941	5.43413	4.31015	0	-4.47288e+81	6.04164e+81	1.23448e+82	5.37072e+81	-9.49848e+80	-3.67121e+81	2.84636e+82	1.23581	0.931225	0.931225	0	6	1.08587	0.992293	0.992293	0	6		3.64729	5.30841	3.29839	0.859409	5.64114	0.862389	2.41969	-5.82432e+06	1.39028e+08	1.33894e+08	9.51464e+06	-1.94227e+08	-9.6226e+07	2.01755e+07	1.23581	0.931225	0.993409	0	6	0.999501	0.977946	0.977946	0	6
2.60047	5.32096	3.17897	0.291874	5.87905	-2.41635	6.20531	-5.40271e+81	-2.02237e+82	-2.02937e+82	7.0629e+81	1.32304e+81	-3.64303e+81	0	1.22337	0.923241	0.923241	0	6	1.45769	0.966143	0.966143	0	6		3.36555	5.11543	3.05854	0.678772	5.64411	0.709569	1.91225	-7.56133e+06	1.09485e+08	1.17481e+08	8.68519e+06	-1.9323e+08	-9.13451e+07	0	1.22337	0.923241	0.993409	0	6	1.45769	1.44317	0.993409	0	6
3.35065	4.39938	3.15951	0.803678	5.66737	0.768802	1.25582	-1.10559e+82	2.37594e+79	-1.76836e+82	1.65541e+81	-1.32843e+82	-7.66437e+81	8.99181e+80	1.27023	0.937506	0.937506	0	6	0.999501	0.916266	0.916266	0	6		3.36698	4.5247	3.42924	0.780148	5.66407	0.723902	1.99418	-6.72694e+06	1.55651e+08	1.49356e+08	1.06859e+07	-2.17234e+08	-1.08324e+08	2.26379e+07	1.27023	0.937506	0.993409	0	6	0.999501	0.977946	0.977946	0	6
2.79878	5.20786	2.33364	0.623208	5.82738	-0.614418	3.56662	2.25396e+82	5.39788e+82	6.69749e+82	-5.24044e+81	-1.54519e+82	-4.16155e+81	2.88886e+83	1.24329	0.930258	0.930258	0	6	1.45769	0.966143	0.966143	0	6		3.14165	5.14991	2.44983	0.777112	5.72621	0.698296	2.18581	-8.6538e+06	1.22614e+08	1.31077e+08	9.75221e+06	-2.1612e+08	-1.02846e+08	0	1.24329	0.930258	0.993409	0	6	1.45769	1.44317	0.993409	0	6
2.39088	4.6675	1.32195	0.594246	5.91955	-1.50812	5.1739	-7.43656e+82	1.00448e+83	2.05242e+83	8.92929e+82	-1.5792e+82	-6.10371e+82	4.73232e+83	1.24376	0.929912	0.929912	0	6	1.08587	0.992293	0.992293	0	6		2.97541	4.43332	1.22079	0.888956	5.74526	0.84101	1.92631	-7.66976e+06	1.74343e+08	1.66642e+08	1.19947e+07	-2.43057e+08	-1.21905e+08	2.53935e+07	1.24376	0.929912	0.993409	0	6	0.999501	0.977946	0.977946	0	6
0.761271	5.92439	2.11049	-0.286993	6.47498	-8.9733	17.6893	-8.98248e+82	-3.36237e+83	-3.37401e+83	1.17427e+83	2.19968e+82	-6.05686e+82	0	1.21811	0.922728	0.922728	0	6	1.45769	0.966143	0.966143	0	6		3.03079	4.89546	0.905911	0.984949	5.76844	0.782241	2.15867	-9.81937e+06	1.3737e+08	1.46241e+08	1.09466e+07	-2.41813e+08	-1.15757e+08	0	1.21811	0.922728	0.993409	0	6	1.45769	1.44317	0.993409	0	6
-36.3023	22.5732	25.9001	-21.4411	18.0919	-171.079	287.574	-1.83814e+83	3.95021e+80	-2.94005e+83	2.75227e+82	-2.20864e+83	-1.27427e+83	1.49497e+82	1.19335	0.915713	0.915713	0	6	0.999501	0.916266	0.916266	0	6		2.66669	5.04727	0.0549653	1.19389	5.71387	0.765385	1.94123	-8.66093e+06	1.95322e+08	1.85933e+08	1.3458e+07	-2.72047e+08	-1.37124e+08	2.84772e+07	1.19335	0.915713	0.993409	0	6	0.999501	0.977946	0.977946	0	6
8.93493	3.54938	-1.49487	4.65872	3.53783	29.3135	0	3.74741e+83	8.97446e+83	1.11352e+84	-8.7127e+82	-2.56902e+83	-6.91894e+82	4.80299e+84	1.1445	0.901011	0.901011	0	6	1.45769	0.966143	0.966143	0	6		2.14643	4.96862	0.721384	1.09757	5.69179	0.72184	1.72003	-1.10683e+07	1.53925e+08	1.6313e+08	1.22843e+07	-2.7066e+08	-1.30224e+08	0	1.1445	0.901011	0.993409	0	6	1.45769	1.44317	0.993409	0	6
0.916847	5.20529	-0.968282	0.470836	6.14703	-4.93143	4.90604	-1.23639e+84	1.67003e+84	3.41234e+84	1.48457e+84	-2.62557e+83	-1.0148e+84	7.8679e+84	1.18199	0.889565	0.889565	0	6	1.08587	0.992293	0.992293	0	6		2.57245	5.94154	0.507476	1.00634	5.64684	0.720611	1.56778	-9.71486e+06	2.18839e+08	2.07449e+08	1.5095e+07	-3.04599e+08	-1.54163e+08	3.19291e+07	1.18199	0.889565	0.993409	0	6	0.999501	0.977946	0.977946	0	6
1.80926	5.67048	0.0374482	0.673169	5.93017	-2.82724	3.63477	-1.49342e+84	-5.59023e+84	-5.60958e+84	1.95233e+84	3.65716e+83	-1.00701e+84	0	1.21098	0.901223	0.901223	0	6	1.45769	0.966143	0.966143	0	6		2.83656	6.05546	0.864259	1.01771	5.62081	0.713866	1.2934	-1.2417e+07	1.72476e+08	1.81942e+08	1.37835e+07	-3.03052e+08	-1.46419e+08	0	1.21098	0.901223	0.993409	0	6	1.45769	1.44317	0.993409	0	6
1.55927	5.27746	0.565652	0.64759	5.88456	-2.13854	2.99396	-3.05607e+84	6.56757e+81	-4.88809e+84	4.57588e+83	-3.67205e+84	-2.11858e+84	2.48551e+83	1.21218	0.8991	0.8991	0	6	0.999501	0.916266	0.916266	0	6		2.4052	5.62315	1.29511	0.922899	5.63034	0.744535	1.23484	-1.08509e+07	2.45189e+08	2.31457e+08	1.6928e+07	-3.4115e+08	-1.73232e+08	3.57949e+07	1.21218	0.8991	0.993409	0	6	0.999501	0.977946	0.977946	0	6
1.6671	5.69281	0.981625	0.514449	5.83412	-1.44635	2.54188	6.2304e+84	1.49208e+85	1.85132e+85	-1.44856e+84	-4.27122e+84	-1.15033e+84	7.98539e+85	1.24222	0.908941	0.908941	0	6	1.45769	0.966143	0.966143	0	6		2.32939	5.96595	1.62181	0.720517	5.63784	0.761231	1.40571	-1.38875e+07	1.93253e+08	2.02913e+08	1.54647e+07	-3.39423e+08	-1.64543e+08	0	1.24222	0.908941	0.993409	0	6	1.45769	1.44317	0.993409	0	6
2.07687	5.53526	1.71058	0.553922	5.70633	0.065949	1.55647	-2.05561e+85	2.77657e+85	5.67331e+85	2.46823e+85	-4.36523e+84	-1.68719e+85	1.30811e+86	1.30186	0.926643	0.926643	0	6	1.08587	0.992293	0.992293	0	6		2.339	5.60863	2.02639	0.624379	5.63413	0.864284	1.36897	-1.20923e+07	2.74705e+08	2.58269e+08	1.89816e+07	-3.82187e+08	-1.94578e+08	4.01266e+07	1.30186	0.926643	0.993409	0	6	0.999501	0.977946	0.977946	0	6
2.21215	6.0505	1.51896	0.61866	5.66785	0.541746	1.14418	-2.48294e+85	-9.29425e+85	-9.32642e+85	3.24591e+85	6.08034e+84	-1.67423e+85	0	1.33337	0.932486	0.932486	0	6	1.45769	0.966143	0.966143	0	6		2.29278	6.12454	1.7636	0.622556	5.64794	0.715458	1.55221	-1.55056e+07	2.16521e+08	2.26321e+08	1.73505e+07	-3.80259e+08	-1.8483e+08	0	1.33337	0.932486	0.993409	0	6	1.45769	1.44317	0.993409	0	6
2.17937	6.45239	1.78552	0.510841	5.65773	0.355078	1.24072	-5.08098e+85	1.09192e+83	-8.12688e+85	7.60781e+84	-6.1051e+85	-3.52233e+85	4.13238e+84	1.32828	0.933928	0.933928	0	6	0.999501	0.916266	0.916266	0	6		2.28789	6.47914	1.96834	0.532571	5.63035	0.644085	1.35069	-1.34646e+07	3.07773e+08	2.88245e+08	2.1284e+07	-4.28256e+08	-2.18481e+08	4.49826e+07	1.32828	0.933928	0.993409	0	6	0.999501	0.977946	0.977946	0	6
2.29601	6.24291	1.58602	0.761381	5.59252	0.847549	0.889428	1.03586e+86	2.48072e+86	3.07798e+86	-2.40836e+85	-7.10128e+85	-1.91253e+85	1.32764e+87	1.35279	0.940948	0.940948	0	6	1.45769	0.966143	0.966143	0	6		2.25561	6.32668	1.65849	0.739015	5.60137	0.706139	1.24221	-1.73006e+07	2.42584e+08	2.52486e+08	1.94665e+07	-4.26102e+08	-2.07546e+08	0	1.35279	0.940948	0.993409	0	6	1.45769	1.44317	0.993409	0	6
1.66422	6.11888	2.55813	0.463011	5.69581	-0.0641594	1.60487	-3.41763e+86	4.61629e+86	9.43237e+86	4.10365e+86	-7.25758e+85	-2.80509e+86	2.17484e+87	1.29803	0.925508	0.925508	0	6	1.08587	0.992293	0.992293	0	6		1.93466	6.16988	2.81672	0.543639	5.62039	0.790762	1.20134	-1.49956e+07	3.44829e+08	3.21795e+08	2.38665e+07	-4.79969e+08	-2.45258e+08	5.04284e+07	1.29803	0.925508	0.993409	0	6	0.999501	0.977946	0.977946	0	6
2.09955	7.00667	3.54301	0.556357	5.59065	0.77003	0.977857	-4.1281e+86	-1.54525e+87	-1.5506e+87	5.39661e+86	1.01091e+86	-2.78356e+86	0	1.3532	0.939715	0.939715	0	6	1.45769	0.966143	0.966143	0	6		2.09758	7.07049	3.65932	0.542985	5.5912	0.724556	1.32751	-1.93047e+07	2.71786e+08	2.81769e+08	2.18411e+07	-4.77561e+08	-2.32992e+08	0	1.3532	0.939715	0.993409	0	6	1.45769	1.44317	0.993409	0	6
2.20189	6.06787	2.53714	0.569935	5.66005	0.877488	0.93296	-8.44757e+86	1.81541e+84	-1.35117e+87	1.26486e+86	-1.01503e+87	-5.85618e+86	6.87045e+85	1.35228	0.939525	0.939525	0	6	0.999501	0.916266	0.916266	0	6		2.15905	6.09565	2.50496	0.557969	5.66956	0.762707	0.988735	-1.67139e+07	3.86366e+08	3.59382e+08	2.6764e+07	-5.38009e+08	-2.75271e+08	5.65377e+07	1.35228	0.939525	0.993409	0	6	0.999501	0.977946	0.977946	0	6
2.22086	6.12469	2.89502	0.493266	5.6271	0.940822	0.999611	1.7222e+87	4.12441e+87	5.11741e+87	-4.00411e+86	-1.18065e+87	-3.17975e+86	2.20732e+88	1.34481	0.941644	0.941644	0	6	1.45769	0.966143	0.966143	0	6		2.12249	6.23029	2.90087	0.456606	5.64915	0.646954	1.3674	-2.15519e+07	3.04518e+08	3.1458e+08	2.45063e+07	-5.35316e+08	-2.61512e+08	0	1.34481	0.941644	0.993409	0	6	1.45769	1.44317	0.993409	0	6
2.57618	4.68598	2.83991	0.48068	5.61173	1.35401	0	-5.68212e+87	7.67499e+87	1.56821e+88	6.82268e+87	-1.20664e+87	-4.66372e+87	3.61586e+88	1.3208	0.953812	0.953812	0	6	1.08587	0.992293	0.992293	0	6		2.33254	5.36169	3.13548	0.359862	5.64884	0.648958	1.53986	-1.86498e+07	4.3294e+08	4.01522e+08	3.00158e+07	-6.03145e+08	-3.08923e+08	6.33926e+07	1.3208	0.953812	0.993409	0	6	0.999501	0.977946	0.977946	0	6
0.897395	12.8634	6.07524	-0.415214	5.6995	-2.33301	13.8041	-6.86332e+87	-2.56911e+88	-2.57801e+88	8.97234e+87	1.68073e+87	-4.62791e+87	0	1.30658	0.957656	0.957656	0	6	1.45769	0.966143	0.966143	0	6		2.14081	6.28362	2.74909	0.351905	5.66301	0.684343	2.07731	-2.40788e+07	3.41218e+08	3.51371e+08	2.74976e+07	-6.00132e+08	-2.93491e+08	0	1.30658	0.957656	0.993409	0	6	1.45769	1.44317	0.993409	0	6
2.13726	6.96849	3.57237	0.440874	5.66749	0.589041	2.30543	-1.40448e+88	3.01827e+85	-2.24643e+88	2.10295e+87	-1.68757e+88	-9.73641e+87	1.14227e+87	1.27317	0.951804	0.951804	0	6	0.999501	0.916266	0.916266	0	6		2.16299	6.76325	3.44584	0.465913	5.66865	0.671238	1.88935	-2.08344e+07	4.85177e+08	4.48793e+08	3.36654e+07	-6.7624e+08	-3.4667e+08	7.10853e+07	1.27317	0.951804	0.993409	0	6	0.999501	0.977946	0.977946	0	6
1.83847	6.32629	2.49796	0.421207	5.69172	0.924016	0.911033	2.86332e+88	6.85719e+88	8.50814e+88	-6.65719e+87	-1.96293e+88	-5.28662e+87	3.66986e+89	1.23616	0.938526	0.938526	0	6	1.45769	0.966143	0.966143	0	6		1.83568	6.56351	2.75825	0.379236	5.68883	0.796997	1.74309	-2.69241e+07	3.82381e+08	3.92651e+08	3.08549e+07	-6.72867e+08	-3.29359e+08	0	1.23616	0.938526	0.993409	0	6	1.45769	1.44317	0.993409	0	6
1.89871	6.66357	3.30656	0.420334	5.7099	0.826619	1.1639	-9.44702e+88	1.27603e+89	2.60729e+89	1.13433e+89	-2.00614e+88	-7.75383e+88	6.01169e+89	1.22309	0.934517	0.934517	0	6	1.08587	0.992293	0.992293	0	6		1.90588	6.93507	3.58794	0.382298	5.70198	0.749966	1.98162	-2.33004e+07	5.43778e+08	5.01841e+08	3.77618e+07	-7.58262e+08	-3.89019e+08	7.97186e+07	1.22309	0.934517	0.993409	0	6	0.999501	0.977946	0.977946	0	6
1.85269	5.79531	3.53275	0.317999	5.64223	0.758372	1.34425	-1.14109e+89	-4.27138e+89	-4.28616e+89	1.49173e+89	2.79435e+88	-7.69431e+88	0	1.19375	0.91752	0.91752	0	6	1.45769	0.966143	0.966143	0	6		1.87385	5.99932	3.77063	0.288399	5.63343	0.717052	2.01403	-3.01292e+07	4.28559e+08	4.38982e+08	3.46229e+07	-7.54485e+08	-3.69602e+08	0	1.19375	0.91752	0.993409	0	6	1.45769	1.44317	0.993409	0	6
1.44419	6.16279	3.7194	0.407674	5.64003	0.707311	1.88696	-2.33507e+89	5.01814e+86	-3.73489e+89	3.49633e+88	-2.80573e+89	-1.61876e+89	1.89913e+88	1.18393	0.918971	0.918971	0	6	0.999501	0.916266	0.916266	0	6		1.46034	6.35429	3.95161	0.382864	5.63204	0.679681	2.51478	-2.60827e+07	6.09529e+08	5.61383e+08	4.23596e+07	-8.50298e+08	-4.3654e+08	8.94079e+07	1.18393	0.918971	0.993409	0	6	0.999501	0.977946	0.977946	0	6
1.51559	5.86393	3.93692	0.226161	5.62134	0.744955	1.59483	4.76051e+89	1.14007e+90	1.41455e+90	-1.10682e+89	-3.26355e+89	-8.78946e+88	6.10146e+90	1.15892	0.919336	0.919336	0	6	1.45769	0.966143	0.966143	0	6		1.55667	6.0862	4.26332	0.191214	5.60932	0.711914	2.4859	-3.37388e+07	4.80372e+08	4.90994e+08	3.88517e+07	-8.46067e+08	-4.14758e+08	0	1.15892	0.919336	0.993409	0	6	1.45769	1.44317	0.993409	0	6
1.82427	6.71225	3.79681	0.210166	5.60274	0.72262	2.24459	-1.57065e+90	2.12152e+90	4.33485e+90	1.88592e+90	-3.33538e+89	-1.28914e+90	9.99496e+90	1.14693	0.937412	0.937412	0	6	1.08587	0.992293	0.992293	0	6		1.84015	6.88729	4.00732	0.189797	5.59461	0.709317	2.79629	-2.92188e+07	6.8331e+08	6.28221e+08	4.75201e+07	-9.5357e+08	-4.8987e+08	1.00282e+08	1.14693	0.937412	0.993409	0	6	0.999501	0.977946	0.977946	0	6
1.98947	5.71458	3.09588	0.114748	5.62459	0.690215	2.40763	-1.89716e+90	-7.10154e+90	-7.12611e+90	2.48013e+90	4.64586e+89	-1.27925e+90	0	1.13291	0.940454	0.940454	0	6	1.45769	0.966143	0.966143	0	6		2.00215	5.83095	3.19703	0.104051	5.61754	0.696652	2.66063	-3.78017e+07	5.38514e+08	5.49386e+08	4.35973e+07	-9.48829e+08	-4.65435e+08	0	1.13291	0.940454	0.993409	0	6	1.45769	1.44317	0.993409	0	6
1.91532	7.0287	4.50911	0.0028554	5.58297	0.64844	2.85709	-3.88227e+90	8.34309e+87	-6.20958e+90	5.81296e+89	-4.66478e+90	-2.69134e+90	3.15747e+89	1.11367	0.949791	0.949791	0	6	0.999501	0.916266	0.916266	0	6		1.92547	7.1297	4.6673	-0.0107981	5.57895	0.632449	3.27628	-3.275e+07	7.66106e+08	7.0325e+08	5.33117e+07	-1.06945e+09	-5.49721e+08	1.12486e+08	1.11367	0.949791	0.993409	0	6	0.999501	0.977946	0.977946	0	6
1.66969	7.3686	3.40486	0.004354	5.5395	0.684342	3.11878	7.91477e+90	1.89546e+91	2.35182e+91	-1.84018e+90	-5.42594e+90	-1.46133e+90	1.01442e+92	1.10576	0.956837	0.956837	0	6	1.45769	0.966143	0.966143	0	6		1.66113	7.36405	3.3219	0.0121138	5.53876	0.706353	2.87646	-4.23717e+07	6.03764e+08	6.14939e+08	4.89229e+07	-1.06413e+09	-5.22309e+08	0	1.10576	0.956837	0.993409	0	6	1.45769	1.44317	0.993409	0	6
1.93624	6.90192	3.53921	-0.0907066	5.55888	0.707699	3.18561	-2.61134e+91	3.52721e+91	7.20707e+91	3.13551e+91	-5.54536e+90	-2.14331e+91	1.66175e+92	1.1028	0.956306	0.956306	0	6	1.08587	0.992293	0.992293	0	6		1.92684	6.9225	3.45726	-0.0820322	5.5563	0.738856	2.93108	-3.67218e+07	8.59023e+08	7.8747e+08	5.98114e+07	-1.19947e+09	-6.16892e+08	1.26182e+08	1.1028	0.956306	0.993409	0	6	0.999501	0.977946	0.977946	0	6
1.69067	6.76598	1.62616	0.00100168	5.58199	0.664751	3.57353	-3.15419e+91	-1.18069e+92	-1.18478e+92	4.12344e+91	7.72415e+90	-2.12686e+91	0	1.10962	0.960956	0.960956	0	6	1.45769	0.966143	0.966143	0	6		1.68394	6.74183	1.54967	0.0082758	5.58241	0.679987	3.35797	-4.75085e+07	6.7699e+08	6.88526e+08	5.4899e+07	-1.19352e+09	-5.86139e+08	0	1.10962	0.960956	0.993409	0	6	1.45769	1.44317	0.993409	0	6
1.73027	6.59521	1.96337	-0.000342382	5.58271	0.600513	3.79223	-6.45461e+91	1.38711e+89	-1.0324e+92	9.66456e+90	-7.7556e+91	-4.47458e+91	5.24956e+90	1.1027	0.955748	0.955748	0	6	0.999501	0.916266	0.916266	0	6		1.72315	6.541	1.84979	0.0093563	5.5843	0.617715	3.48369	-4.11851e+07	9.63297e+08	8.82002e+08	6.71054e+07	-1.34537e+09	-6.92277e+08	1.41552e+08	1.1027	0.955748	0.993409	0	6	0.999501	0.977946	0.977946	0	6
1.90816	6.24812	2.90394	-0.00572326	5.58793	0.679457	4.3293	1.3159e+92	3.15137e+92	3.9101e+92	-3.05946e+91	-9.0211e+91	-2.42958e+91	1.68656e+93	1.10147	0.955535	0.955535	0	6	1.45769	0.966143	0.966143	0	6		1.89256	6.09574	2.6555	0.0134884	5.59441	0.701642	3.67841	-5.32788e+07	7.59168e+08	7.71126e+08	6.16049e+07	-1.33869e+09	-6.57775e+08	0	1.10147	0.955535	0.993409	0	6	1.45769	1.44317	0.993409	0	6
1.94873	5.93325	2.9174	-0.110949	5.52586	0.761471	4.80877	-4.34158e+92	5.86429e+92	1.19824e+93	5.21306e+92	-9.21965e+91	-3.56344e+92	2.7628e+93	1.09891	0.955237	0.955237	0	6	1.08587	0.992293	0.992293	0	6		1.92738	5.73561	2.62029	-0.0897538	5.53585	0.776278	4.04662	-4.61973e+07	1.08032e+09	9.881e+08	7.52905e+07	-1.50907e+09	-7.76879e+08	1.588e+08	1.09891	0.955237	0.993409	0	6	0.999501	0.977946	0.977946	0	6
1.71201	7.05933	2.43042	-0.295952	5.51297	0.604991	4.60637	-5.24412e+92	-1.963e+93	-1.9698e+93	6.85557e+92	1.28421e+92	-3.53609e+92	0	1.09969	0.95701	0.95701	0	6	1.45769	0.966143	0.966143	0	6		1.71274	6.98099	2.34454	-0.293742	5.51701	0.6015	4.40839	-5.97577e+07	8.51392e+08	8.63832e+08	6.91298e+07	-1.50159e+09	-7.38169e+08	0	1.09969	0.95701	0.993409	0	6	1.45769	1.44317	0.993409	0	6
1.69451	6.70297	1.75553	-0.185184	5.54133	0.647782	4.75454	-1.07313e+93	2.3062e+90	-1.71645e+93	1.60682e+92	-1.28944e+93	-7.43938e+92	8.72786e+91	1.10311	0.963468	0.963468	0	6	0.999501	0.916266	0.916266	0	6		1.71119	6.51149	1.4902	-0.177969	5.54693	0.670432	4.10902	-5.18229e+07	1.21164e+09	1.10717e+09	8.44753e+07	-1.69277e+09	-8.7182e+08	1.78154e+08	1.10311	0.963468	0.993409	0	6	0.999501	0.977946	0.977946	0	6
1.52453	6.7614	2.37731	-0.293026	5.52042	0.536203	5.53341	2.1878e+93	5.23943e+93	6.50089e+93	-5.08661e+92	-1.49984e+93	-4.03939e+92	2.80406e+94	1.09541	0.958033	0.958033	0	6	1.45769	0.966143	0.966143	0	6		1.54519	6.41312	1.89582	-0.283436	5.53392	0.560123	4.38212	-6.70295e+07	9.54886e+08	9.67875e+08	7.75735e+07	-1.68438e+09	-8.28389e+08	0	1.09541	0.958033	0.993409	0	6	1.45769	1.44317	0.993409	0	6
1.54828	6.40202	2.56352	-0.274609	5.54099	0.610512	5.49898	-7.21826e+93	9.7499e+93	1.99218e+94	8.66717e+93	-1.53285e+93	-5.92454e+93	4.5934e+94	1.09492	0.960832	0.960832	0	6	1.08587	0.992293	0.992293	0	6		1.60395	6.07659	2.13659	-0.281744	5.55067	0.635184	4.5285	-5.8135e+07	1.359e+09	1.2408e+09	9.47818e+07	-1.89889e+09	-9.78363e+08	1.99872e+08	1.09492	0.960832	0.993409	0	6	0.999501	0.977946	0.977946	0	6
1.55099	6.94665	2.43697	-0.363904	5.52311	0.628365	5.90381	-8.71881e+93	-3.26367e+94	-3.27496e+94	1.1398e+94	2.13511e+93	-5.87906e+93	0	1.08979	0.959496	0.959496	0	6	1.45769	0.966143	0.966143	0	6		1.62749	6.58969	1.9513	-0.383244	5.5338	0.653409	4.83153	-7.51892e+07	1.07103e+09	1.08463e+09	8.70482e+07	-1.88949e+09	-9.29633e+08	0	1.08979	0.959496	0.993409	0	6	1.45769	1.44317	0.993409	0	6
1.47814	6.28366	2.47579	-0.325908	5.55405	0.53967	5.94212	-1.78418e+94	3.83425e+91	-2.85375e+94	2.67147e+93	-2.1438e+94	-1.23686e+94	1.45108e+93	1.08676	0.962312	0.962312	0	6	0.999501	0.916266	0.916266	0	6		1.62627	5.88675	1.93189	-0.378239	5.56151	0.575916	4.82862	-6.52158e+07	1.52437e+09	1.39074e+09	1.06347e+08	-2.13019e+09	-1.09792e+09	2.24242e+08	1.08676	0.962312	0.993409	0	6	0.999501	0.977946	0.977946	0	6
1.63158	5.91607	2.72235	-0.226735	5.54157	0.530211	6.1317	3.63741e+94	8.71101e+94	1.08083e+95	-8.45694e+93	-2.49361e+94	-6.71584e+93	4.662e+95	1.0854	0.961815	0.961815	0	6	1.45769	0.966143	0.966143	0	6		1.7671	5.56334	2.225	-0.276035	5.54813	0.564265	5.11437	-8.43438e+07	1.20135e+09	1.21565e+09	9.76797e+07	-2.11964e+09	-1.04324e+09	0	1.0854	0.961815	0.993409	0	6	1.45769	1.44317	0.993409	0	6
1.69635	6.16522	3.4352	-0.22161	5.50442	0.538775	7.57397	-1.2001e+95	1.62101e+95	3.31217e+95	1.44099e+95	-2.54849e+94	-9.85006e+94	7.63694e+95	1.07951	0.957128	0.957128	0	6	1.08587	0.992293	0.992293	0	6		1.8536	5.56738	2.44413	-0.281581	5.52347	0.597588	5.4055	-7.31585e+07	1.70994e+09	1.559e+09	1.19324e+08	-2.38973e+09	-1.23208e+09	2.51588e+08	1.07951	0.957128	0.993409	0	6	0.999501	0.977946	0.977946	0	6
1.64889	5.86663	5.11284	-0.423086	5.498	0.517151	7.46549	-1.44958e+95	-5.42613e+95	-5.44491e+95	1.89502e+95	3.5498e+94	-9.77445e+94	0	1.07932	0.957014	0.957014	0	6	1.45769	0.966143	0.966143	0	6		1.79458	5.3106	4.18956	-0.479589	5.51607	0.570168	5.44799	-9.46141e+07	1.3476e+09	1.36267e+09	1.09609e+08	-2.3779e+09	-1.17073e+09	0	1.07932	0.957014	0.993409	0	6	1.45769	1.44317	0.993409	0	6
1.55891	5.37068	3.35054	-0.459122	5.50029	0.550513	6.30734	-2.96636e+95	6.37478e+92	-4.74461e+95	4.44156e+94	-3.56426e+95	-2.05639e+95	2.41255e+94	1.07873	0.963674	0.963674	0	6	0.999501	0.916266	0.916266	0	6		1.81856	5.06585	2.90128	-0.581682	5.49916	0.581634	5.61977	-8.20679e+07	1.91816e+09	1.74781e+09	1.33885e+08	-2.68096e+09	-1.38263e+09	2.82273e+08	1.07873	0.963674	0.993409	0	6	0.999501	0.977946	0.977946	0	6
1.47498	5.25601	2.10943	-0.343983	5.499	0.549349	6.05451	6.04751e+95	1.44828e+96	1.79697e+96	-1.40604e+95	-4.14584e+95	-1.11657e+95	7.75098e+96	1.07866	0.967194	0.967194	0	6	1.45769	0.966143	0.966143	0	6		1.75263	5.03427	1.82044	-0.480572	5.49348	0.566522	5.7957	-1.06136e+08	1.51171e+09	1.52764e+09	1.22996e+08	-2.66769e+09	-1.31379e+09	0	1.07866	0.967194	0.993409	0	6	1.45769	1.44317	0.993409	0	6
1.27759	5.91814	2.61973	-0.454358	5.52913	0.596964	6.26157	-1.99527e+96	2.69506e+96	5.50677e+96	2.39578e+96	-4.23709e+95	-1.63766e+96	1.26971e+97	1.07875	0.963285	0.963285	0	6	1.08587	0.992293	0.992293	0	6		1.52233	5.65817	2.25602	-0.573489	5.52767	0.615729	5.77249	-9.2062e+07	2.15182e+09	1.95967e+09	1.50225e+08	-3.00776e+09	-1.55155e+09	3.16705e+08	1.07875	0.963285	0.993409	0	6	0.999501	0.977946	0.977946	0	6
1.23585	5.37474	1.93155	-0.227108	5.51421	0.564297	6.11301	-2.41005e+96	-9.02142e+96	-9.05264e+96	3.15063e+96	5.90185e+95	-1.62509e+96	0	1.07894	0.966833	0.966833	0	6	1.45769	0.966143	0.966143	0	6		1.51691	5.08942	1.52217	-0.359427	5.51024	0.597524	5.54831	-1.19062e+08	1.69586e+09	1.71275e+09	1.38017e+08	-2.99287e+09	-1.47432e+09	0	1.07894	0.966833	0.993409	0	6	1.45769	1.44317	0.993409	0	6
1.55618	5.42358	3.10143	-0.376018	5.45993	0.627854	6.62516	-4.93183e+96	1.05986e+94	-7.88832e+96	7.38448e+95	-5.92589e+96	-3.41893e+96	4.01108e+95	1.07905	0.959091	0.959091	0	6	0.999501	0.916266	0.916266	0	6		1.7293	5.09235	2.58915	-0.456018	5.4662	0.653488	5.66145	-1.03274e+08	2.41401e+09	2.19739e+09	1.68559e+08	-3.37446e+09	-1.74111e+09	3.55341e+08	1.07905	0.959091	0.993409	0	6	0.999501	0.977946	0.977946	0	6
1.45235	5.343	2.88088	-0.46317	5.49173	0.587889	6.06835	1.00545e+97	2.4079e+97	2.98763e+97	-2.33766e+96	-6.89283e+96	-1.85639e+96	1.28867e+98	1.07854	0.962442	0.962442	0	6	1.45769	0.966143	0.966143	0	6		1.6313	5.15855	2.62739	-0.552092	5.49093	0.59732	5.74827	-1.33563e+08	1.9025e+09	1.92045e+09	1.54872e+08	-3.35777e+09	-1.65445e+09	0	1.07854	0.962442	0.993409	0	6	1.45769	1.44317	0.993409	0	6
1.52119	5.1033	3.24069	-0.322706	5.4901	0.599305	6.04855	-3.31731e+97	4.48078e+97	9.15548e+97	3.98319e+97	-7.04454e+96	-2.72275e+97	2.111e+98	1.07838	0.965972	0.965972	0	6	1.08587	0.992293	0.992293	0	6		1.77162	4.89084	2.95384	-0.44586	5.48582	0.616254	5.75199	-1.15852e+08	2.70822e+09	2.46414e+09	1.89132e+08	-3.78594e+09	-1.95381e+09	3.98694e+08	1.07838	0.965972	0.993409	0	6	0.999501	0.977946	0.977946	0	6
1.31934	5.02105	3.37879	-0.452489	5.49309	0.564005	6.12787	-4.00692e+97	-1.49989e+98	-1.50508e+98	5.2382e+97	9.81235e+96	-2.70185e+97	0	1.07882	0.961989	0.961989	0	6	1.45769	0.966143	0.966143	0	6		1.50291	4.82831	3.1203	-0.544286	5.4927	0.570928	5.80774	-1.49833e+08	2.13436e+09	2.15352e+09	1.73785e+08	-3.76722e+09	-1.85657e+09	0	1.07882	0.961989	0.993409	0	6	1.45769	1.44317	0.993409	0	6
1.48062	4.85872	2.92405	-0.238636	5.48163	0.480802	5.90366	-8.19959e+97	1.76211e+95	-1.3115e+98	1.22773e+97	-9.85231e+97	-5.68427e+97	6.66877e+96	1.07867	0.965691	0.965691	0	6	0.999501	0.916266	0.916266	0	6		1.68387	4.7172	2.76185	-0.342262	5.4776	0.482714	5.84913	-1.29964e+08	3.03835e+09	2.76346e+09	2.12217e+08	-4.24768e+09	-2.19248e+09	4.47342e+08	1.07867	0.965691	0.993409	0	6	0.999501	0.977946	0.977946	0	6
1.70555	4.62498	3.32406	-0.15472	5.48168	0.452778	6.93863	1.67165e+98	4.00334e+98	4.96719e+98	-3.88657e+97	-1.14599e+98	-3.08641e+97	2.14252e+99	1.07914	0.958257	0.958257	0	6	1.45769	0.966143	0.966143	0	6		1.88251	4.24301	2.73336	-0.237071	5.49087	0.477239	5.80033	-1.68089e+08	2.39454e+09	2.41504e+09	1.95007e+08	-4.22668e+09	-2.08337e+09	0	1.07914	0.958257	0.993409	0	6	1.45769	1.44317	0.993409	0	6
2.02974	5.31037	3.51527	-0.295275	5.35745	0.537299	7.72829	-5.51532e+98	7.44969e+98	1.52218e+99	6.6224e+98	-1.17122e+98	-4.52681e+98	3.50972e+99	1.07936	0.955887	0.955887	0	6	1.08587	0.992293	0.992293	0	6		2.1315	4.79319	2.69364	-0.342673	5.38043	0.552008	5.94879	-1.45798e+08	3.4088e+09	3.09932e+09	2.38121e+08	-4.7658e+09	-2.4603e+09	5.01929e+08	1.07936	0.955887	0.993409	0	6	0.999501	0.977946	0.977946	0	6
1.90443	5.06123	3.44075	-0.172992	5.31666	0.726271	5.95084	-6.66185e+98	-2.4937e+99	-2.50233e+99	8.70896e+98	1.63139e+98	-4.49206e+98	0	1.08435	0.959012	0.959012	0	6	1.45769	0.966143	0.966143	0	6		2.01695	4.86216	3.23521	-0.229798	5.3219	0.710977	5.67227	-1.88572e+08	2.68649e+09	2.70848e+09	2.18822e+08	-4.74224e+09	-2.33787e+09	0	1.08435	0.959012	0.993409	0	6	1.45769	1.44317	0.993409	0	6
1.96852	5.16441	3.09279	-0.197326	5.3153	0.686041	5.91527	-1.36325e+99	2.92967e+96	-2.18049e+99	2.04122e+98	-1.63803e+99	-9.4506e+98	1.10874e+98	1.08574	0.956566	0.956566	0	6	0.999501	0.916266	0.916266	0	6		2.01796	4.97335	2.88247	-0.224519	5.32475	0.664717	5.5362	-1.63566e+08	3.82448e+09	3.47619e+09	2.67189e+08	-5.34719e+09	-2.76081e+09	5.63183e+08	1.08574	0.956566	0.993409	0	6	0.999501	0.977946	0.977946	0	6
2.4025	5.82434	3.72505	-0.196562	5.29605	0.661163	5.51483	2.77926e+99	6.6559e+99	8.25839e+99	-6.46177e+98	-1.90531e+99	-5.13143e+98	3.56213e+100	1.08954	0.957075	0.957075	0	6	1.45769	0.966143	0.966143	0	6		2.44967	5.66244	3.59751	-0.223519	5.30441	0.629957	5.34006	-2.11556e+08	3.01409e+09	3.03776e+09	2.45544e+08	-5.32076e+09	-2.62344e+09	0	1.08954	0.957075	0.993409	0	6	1.45769	1.44317	0.993409	0	6
2.58361	4.93239	2.63308	0.105009	5.11285	0.913017	5.1074	-9.1697e+99	1.23858e+100	2.53076e+100	1.10103e+100	-1.94725e+99	-7.52622e+99	5.83522e+100	1.09555	0.958221	0.958221	0	6	1.08587	0.992293	0.992293	0	6		2.62492	4.74995	2.49513	0.0863059	5.12128	0.886711	4.88464	-1.83503e+08	4.29091e+09	3.89907e+09	2.99806e+08	-5.99958e+09	-3.09803e+09	6.31917e+08	1.09555	0.958221	0.993409	0	6	0.999501	0.977946	0.977946	0	6
2.8862	4.43007	2.65506	0.0988294	4.86392	1.22733	4.29559	-1.10759e+100	-4.14599e+100	-4.16034e+100	1.44794e+100	2.71233e+99	-7.46845e+99	0	1.09303	0.954196	0.954196	0	6	1.45769	0.966143	0.966143	0	6		2.89384	4.52234	2.89667	0.0774595	4.86405	1.17343	4.97023	-2.37346e+08	3.38169e+09	3.40725e+09	2.7553e+08	-5.96993e+09	-2.94389e+09	0	1.09303	0.954196	0.993409	0	6	1.45769	1.44317	0.993409	0	6
3.25532	3.64752	0.825209	0.0185686	4.9077	1.25091	2.18754	-2.26653e+100	4.87083e+97	-3.62525e+100	3.3937e+99	-2.72337e+100	-1.57125e+100	1.84338e+99	1.09581	0.953365	0.953365	0	6	0.999501	0.916266	0.916266	0	6		3.33576	4.17601	1.85474	-0.0691229	4.887	1.12474	4.95737	-2.05874e+08	4.81431e+09	4.3736e+09	3.36406e+08	-6.73164e+09	-3.47642e+09	7.09043e+08	1.09581	0.953365	0.993409	0	6	0.999501	0.977946	0.977946	0	6
3.44109	3.64421	0.446595	0.194674	4.19602	1.9245	2.03252	4.62077e+100	1.1066e+101	1.37303e+101	-1.07433e+100	-3.16775e+100	-8.53145e+99	5.92236e+101	1.1095	0.957171	0.957171	0	6	1.45769	0.966143	0.966143	0	6		3.48293	4.22031	1.36478	0.118062	4.17649	1.81827	4.46549	-2.66286e+08	3.79418e+09	3.82185e+09	3.09177e+08	-6.69837e+09	-3.30346e+09	0	1.1095	0.957171	0.993409	0	6	1.45769	1.44317	0.993409	0	6
3.15309	3.3766	-1.47339	0.125751	3.75969	2.34997	0.505141	-1.52454e+101	2.05924e+101	4.2076e+101	1.83056e+101	-3.23747e+100	-1.2513e+101	9.70156e+101	1.14869	0.937806	0.937806	0	6	1.08587	0.992293	0.992293	0	6		3.2472	4.30992	-0.0450985	-0.00442861	3.72324	2.19171	4.31986	-2.30978e+08	5.40161e+09	4.90607e+09	3.77475e+08	-7.55309e+09	-3.90101e+09	7.95589e+08	1.14869	0.937806	0.993409	0	6	0.999501	0.977946	0.977946	0	6
2.90366	3.49423	-1.83614	0.496498	3.35412	2.7969	0.922851	-1.84147e+101	-6.89307e+101	-6.91693e+101	2.40733e+101	4.50948e+100	-1.24169e+101	0	1.18771	0.942659	0.942659	0	6	1.45769	0.966143	0.966143	0	6		2.92212	4.55309	-0.567475	0.382197	3.32013	2.67108	4.23214	-2.98761e+08	4.25704e+09	4.28709e+09	3.46934e+08	-7.51577e+09	-3.70694e+09	0	1.18771	0.942659	0.993409	0	6	1.45769	1.44317	0.993409	0	6
2.99863	3.67971	-2.87005	0.796842	3.22575	3.07123	0	-3.7683e+101	8.09818e+98	-6.0273e+101	5.64232e+100	-4.52785e+101	-2.61233e+101	3.06478e+100	1.20959	0.926699	0.926699	0	6	0.999501	0.916266	0.916266	0	6		3.12288	4.87242	-0.975641	0.588145	3.1887	2.65741	3.85268	-2.59148e+08	6.06064e+09	5.50357e+09	4.2356e+08	-8.47485e+09	-4.37746e+09	8.92702e+08	1.20959	0.926699	0.993409	0	6	0.999501	0.977946	0.977946	0	6
3.02631	3.14483	-3.67619	1.03085	3.24691	3.36248	0	7.68243e+101	1.83982e+102	2.28278e+102	-1.78616e+101	-5.26666e+101	-1.41843e+101	9.84644e+102	1.19055	0.916034	0.916034	0	6	1.45769	0.966143	0.966143	0	6		3.20827	4.35019	-1.52476	0.787759	3.20731	2.85287	3.6639	-3.35201e+08	4.77643e+09	4.80913e+09	3.89301e+08	-8.43298e+09	-4.15969e+09	0	1.19055	0.916034	0.993409	0	6	1.45769	1.44317	0.993409	0	6
3.1187	2.36031	-5.83908	1.35016	3.26827	3.43617	0	-2.53469e+102	3.42367e+102	6.99551e+102	3.04347e+102	-5.38258e+101	-2.0804e+102	1.61297e+103	1.1729	0.909483	0.909483	0	6	1.08587	0.992293	0.992293	0	6		3.36182	3.80102	-3.17319	1.04626	3.21953	2.79212	3.80701	-2.90759e+08	6.80014e+09	6.17403e+09	4.75272e+08	-9.50918e+09	-4.91209e+09	1.00168e+09	1.1729	0.909483	0.993409	0	6	0.999501	0.977946	0.977946	0	6
3.23218	1.24989	-10.6207	1.34664	3.27635	5.61306	0	-3.0616e+102	-1.14603e+103	-1.15e+103	4.00239e+102	7.49741e+101	-2.06443e+102	0	1.15151	0.916474	0.916474	0	6	1.45769	0.966143	0.966143	0	6		3.50855	2.86315	-7.59294	1.0004	3.22271	4.86628	3.90807	-3.76092e+08	5.35923e+09	5.39493e+09	4.36841e+08	-9.4622e+09	-4.66773e+09	0	1.15151	0.916474	0.993409	0	6	1.45769	1.44317	0.993409	0	6
4.67551	-0.379526	-10.2017	1.87032	3.2785	11.5282	0	-6.26513e+102	1.34639e+100	-1.00209e+103	9.38086e+101	-7.52794e+102	-4.34323e+102	5.09546e+101	1.15925	0.916681	0.916681	0	6	0.999501	0.916266	0.916266	0	6		4.95381	1.97176	-5.76918	1.31561	3.23807	9.98882	4.59131	-3.26231e+08	7.62995e+09	6.92636e+09	5.33299e+08	-1.06698e+10	-5.512e+09	1.12396e+09	1.15925	0.916681	0.993409	0	6	0.999501	0.977946	0.977946	0	6
10.8636	1.41163	-4.692	3.15257	1.86137	26.7054	0	1.27727e+103	3.05886e+103	3.79533e+103	-2.96965e+102	-8.75629e+102	-2.35826e+102	1.63706e+104	1.16313	0.944696	0.944696	0	6	1.45769	0.966143	0.966143	0	6		6.39179	0.0428897	-7.01061	1.54074	3.22832	10.8434	5.22095	-4.21977e+08	6.01321e+09	6.05226e+09	4.90187e+08	-1.06171e+10	-5.23781e+09	0	1.16313	0.944696	0.993409	0	6	1.45769	1.44317	0.993409	0	6
-23.17	-22.9133	-50.3156	-5.02251	12.0545	-78.9525	14.6064	-4.21414e+103	5.69215e+103	1.16306e+104	5.06003e+103	-8.94901e+102	-3.45884e+103	2.6817e+104	1.21443	0.940453	0.940453	0	6	1.08587	0.992293	0.992293	0	6		6.30915	-0.845014	-9.43867	1.98037	3.28119	11.9348	5.7416	-3.66035e+08	8.56109e+09	7.77057e+09	5.98413e+08	-1.19722e+10	-6.18517e+09	1.26117e+09	1.21443	0.940453	0.993409	0	6	0.999501	0.977946	0.977946	0	6
-10.4595	-12.8289	-34.2284	-1.21832	7.97685	-38.7965	7.70339	-5.09018e+103	-1.90538e+104	-1.91198e+104	6.65433e+103	1.24651e+103	-3.43229e+103	0	1.17184	0.930828	0.930828	0	6	1.45769	0.966143	0.966143	0	6		5.40373	-0.490262	-11.2419	2.43745	3.26197	9.71887	5.92956	-4.73465e+08	6.74704e+09	6.78987e+09	5.50048e+08	-1.1913e+10	-5.87751e+09	0	1.17184	0.930828	0.993409	0	6	1.45769	1.44317	0.993409	0	6
-4.39227	-8.31157	-26.1729	0.790127	6.11242	-19.3459	4.75874	-1.04163e+104	2.2385e+101	-1.66606e+104	1.55965e+103	-1.25159e+104	-7.221e+103	8.47166e+102	1.12556	0.914095	0.914095	0	6	0.999501	0.916266	0.916266	0	6		5.17311	-0.656302	-11.8405	2.94227	3.2724	9.72675	5.10818	-4.107e+08	9.60593e+09	8.71787e+09	6.71477e+08	-1.34336e+10	-6.94055e+09	1.41514e+09	1.12556	0.914095	0.993409	0	6	0.999501	0.977946	0.977946	0	6
0.158435	-6.42674	-22.1586	2.11852	4.96579	-6.10333	2.84824	2.12358e+104	5.08563e+104	6.31006e+104	-4.9373e+103	-1.45581e+104	-3.92082e+103	2.72175e+105	1.09325	0.940001	0.940001	0	6	1.45769	0.966143	0.966143	0	6		5.81947	-1.61499	-13.0593	3.3239	3.28894	10.8651	4.91078	-5.31242e+08	7.57049e+09	7.61754e+09	6.17218e+08	-1.33672e+10	-6.59532e+09	0	1.09325	0.940001	0.993409	0	6	1.45769	1.44317	0.993409	0	6
3.23949	-4.15802	-17.4726	3.26427	4.42505	4.41033	1.106	-7.00637e+104	9.46369e+104	1.9337e+105	8.41275e+104	-1.48785e+104	-5.75063e+104	4.45857e+105	1.06957	0.936582	0.936582	0	6	1.08587	0.992293	0.992293	0	6		5.34967	-1.84211	-12.935	3.58665	3.80734	10.2939	5.3217	-4.6082e+08	1.07784e+10	9.78084e+09	7.53464e+08	-1.50734e+10	-7.78817e+09	1.58791e+09	1.06957	0.936582	0.993409	0	6	0.999501	0.977946	0.977946	0	6
5.54388	-2.34397	-13.9426	4.3461	3.89786	13.2756	0	-8.46287e+104	-3.16786e+105	-3.17883e+105	1.10634e+105	2.07243e+104	-5.70648e+104	0	1.05292	0.949579	0.949579	0	6	1.45769	0.966143	0.966143	0	6		4.70241	-2.20724	-13.426	3.95989	4.15909	10.0332	5.03795	-5.96075e+08	8.4945e+09	8.5463e+09	6.92591e+08	-1.4999e+10	-7.40079e+09	0	1.05292	0.949579	0.993409	0	6	1.45769	1.44317	0.993409	0	6
6.74827	-0.971961	-11.6463	4.85463	3.71445	18.1718	0	-1.73181e+105	3.7217e+102	-2.76998e+105	2.59305e+104	-2.08087e+105	-1.20055e+105	1.40849e+104	1.00767	0.999657	0.999657	0	6	0.999501	0.916266	0.916266	0	6		4.07702	-2.19208	-13.6355	4.03059	4.52047	9.27713	4.8346	-5.17061e+08	1.2094e+10	1.09736e+10	8.45463e+08	-1.69136e+10	-8.7393e+09	1.78178e+09	1.00767	0.999657	0.993409	0	6	0.999501	0.977946	0.977946	0	6
6.95969	-0.155518	-9.44908	4.96721	3.83912	19.6212	0	3.53063e+105	8.4553e+105	1.0491e+106	-8.20869e+104	-2.42041e+105	-6.5187e+104	4.52515e+106	1.02205	0.993345	0.993345	0	6	1.45769	0.966143	0.966143	0	6		3.67151	-1.85743	-12.3365	4.00144	4.82849	8.84123	4.54649	-6.68825e+08	9.53134e+09	9.58846e+09	7.77168e+08	-1.683e+10	-8.30462e+09	0	1.02205	0.993345	0.993409	0	6	1.45769	1.44317	0.993409	0	6
10.8384	4.20501	-1.45322	6.06881	2.87118	32.9854	0	-1.16487e+106	1.57342e+106	3.21494e+106	1.39869e+106	-2.47368e+105	-9.56092e+105	7.41276e+106	1.01222	0.986557	0.986557	0	6	1.08587	0.992293	0.992293	0	6		3.27329	-0.639575	-10.1342	4.07267	5.13433	8.96942	4.19083	-5.80169e+08	1.35702e+10	1.23121e+10	9.48697e+08	-1.89784e+10	-9.80658e+09	1.99932e+09	1.01222	0.986557	0.993409	0	6	0.999501	0.977946	0.977946	0	6
3.98161	-0.885337	-5.6088	4.59953	5.02696	12.5362	0	-1.40703e+106	-5.26685e+106	-5.28508e+106	1.83939e+106	3.4456e+105	-9.48752e+105	0	0.994588	0.998446	0.998446	0	6	1.45769	0.966143	0.966143	0	6		3.98161	-0.885337	-5.6088	4.59953	5.02696	12.5362	0	-7.50458e+08	1.06948e+10	1.07579e+10	8.72074e+08	-1.88847e+10	-9.31882e+09	0	0.994588	0.998446	0.998446	0	6	1.45769	1.44317	0.993409	0	6
4.38842	0.803975	-5.49634	4.88808	4.83005	14.1384	0	-2.87928e+106	6.18765e+103	-4.60533e+106	4.31118e+105	-3.45963e+106	-1.99603e+106	2.34173e+105	0.995086	0.989293	0.989293	0	6	0.999501	0.916266	0.916266	0	6		4.38842	0.803975	-5.49634	4.88808	4.83005	14.1384	0	-6.50985e+08	1.52268e+10	1.3814e+10	1.06454e+09	-2.12953e+10	-1.10042e+10	2.24343e+09	0.995086	0.989293	0.989293	0	6	0.999501	0.977946	0.977946	0	6
4.22024	2.02046	-4.46509	4.64425	4.97245	13.2128	0	5.86998e+106	1.40577e+107	1.74422e+107	-1.36477e+106	-4.02414e+106	-1.08379e+106	7.52345e+107	0.981806	0.977668	0.977668	0	6	1.45769	0.966143	0.966143	0	6		4.22024	2.02046	-4.46509	4.64425	4.97245	13.2128	0	-8.42061e+08	1.20003e+10	1.20701e+10	9.78569e+08	-2.11902e+10	-1.04569e+10	0	0.981806	0.977668	0.977668	0	6	1.45769	1.44317	0.993409	0	6
-1.81824	-0.376082	-8.57631	3.26806	6.62262	-3.46974	2.20292	-1.9367e+107	2.61595e+107	5.34512e+107	2.32545e+107	-4.11271e+106	-1.58959e+107	1.23244e+108	1.0059	0.994972	0.994972	0	6	1.08587	0.992293	0.992293	0	6		2.57488	3.1591	-1.95142	4.25176	5.31855	9.86615	2.49113	-7.30447e+08	1.70856e+10	1.54993e+10	1.19452e+09	-2.38952e+10	-1.2348e+10	2.51734e+09	1.0059	0.994972	0.993409	0	6	0.999501	0.977946	0.977946	0	6
-1.36488	-0.64901	-4.57048	3.20762	6.48086	-2.35405	2.02327	-2.3393e+107	-8.7566e+107	-8.7869e+107	3.05814e+107	5.72861e+106	-1.57738e+107	0	1.01142	0.989948	0.989948	0	6	1.45769	0.966143	0.966143	0	6		2.66095	2.52874	1.36478	4.12411	5.28495	9.91918	1.87911	-9.4485e+08	1.34653e+10	1.35426e+10	1.09807e+09	-2.37772e+10	-1.17339e+10	0	1.01142	0.989948	0.993409	0	6	1.45769	1.44317	0.993409	0	6
0.54519	1.13191	-1.16261	3.63354	5.93672	3.49004	1.17898	-4.78705e+107	1.02875e+105	-7.65676e+107	7.16771e+106	-5.75194e+107	-3.31857e+107	3.89334e+106	1.02752	0.97517	0.97517	0	6	0.999501	0.916266	0.916266	0	6		2.77622	3.04873	2.46834	4.10358	5.27617	10.1599	2.12715	-8.19613e+08	1.91714e+10	1.73904e+10	1.34038e+09	-2.68126e+10	-1.3856e+10	2.82471e+09	1.02752	0.97517	0.993409	0	6	0.999501	0.977946	0.977946	0	6
3.06372	4.27091	4.88739	4.40797	5.0589	12.3084	0	9.75936e+107	2.33721e+108	2.89993e+108	-2.26904e+107	-6.69049e+107	-1.8019e+107	1.25084e+109	1.02389	0.978127	0.978127	0	6	1.45769	0.966143	0.966143	0	6		2.47288	4.1281	4.72619	4.19481	5.23897	10.2336	2.0125	-1.06019e+09	1.51091e+10	1.51949e+10	1.23216e+09	-2.66802e+10	-1.31669e+10	0	1.02389	0.978127	0.993409	0	6	1.45769	1.44317	0.993409	0	6
3.05245	4.34638	5.93563	4.36017	5.06665	11.9583	0	-3.21993e+108	4.34925e+108	8.88673e+108	3.86626e+108	-6.83775e+107	-2.64283e+108	2.04903e+109	0.998585	0.993207	0.993207	0	6	1.08587	0.992293	0.992293	0	6		3.05245	4.34638	5.93563	4.36017	5.06665	11.9583	0	-9.19668e+08	2.1512e+10	1.95124e+10	1.50405e+09	-3.00863e+10	-1.55481e+10	3.16961e+09	0.998585	0.993207	0.993207	0	6	0.999501	0.977946	0.977946	0	6
3.52286	4.48463	8.92223	4.12104	4.98095	12.8827	0	-3.8893e+108	-1.45586e+109	-1.4609e+109	5.08443e+108	9.52431e+107	-2.62254e+108	0	1.01966	0.996434	0.996434	0	6	1.45769	0.966143	0.966143	0	6		2.77082	4.14568	8.37219	3.88793	5.20794	10.3746	1.53168	-1.18962e+09	1.69537e+10	1.7049e+10	1.38263e+09	-2.99377e+10	-1.47748e+10	0	1.01966	0.996434	0.993409	0	6	1.45769	1.44317	0.993409	0	6
-1135.26	-818.476	-1501.82	-274.115	344.475	-3525.42	547.145	-7.9589e+108	1.71039e+106	-1.273e+109	1.1917e+108	-9.5631e+108	-5.51741e+108	6.47301e+107	1.02938	0.986114	0.986114	0	6	0.999501	0.916266	0.916266	0	6		3.29528	3.77188	9.01513	3.67184	5.17936	10.2845	1.70461	-1.03194e+09	2.41383e+10	2.18935e+10	1.68771e+09	-3.37597e+10	-1.74468e+10	3.55663e+09	1.02938	0.986114	0.993409	0	6	0.999501	0.977946	0.977946	0	6
11.1504	9.31925	18.4525	5.68183	2.75254	35.3772	0	1.62258e+109	3.88582e+109	4.82138e+109	-3.77248e+108	-1.11235e+109	-2.99581e+108	2.07963e+110	1.05363	0.949615	0.949615	0	6	1.45769	0.966143	0.966143	0	6		3.1116	3.79066	8.39277	3.65321	5.15205	10.1792	1.97785	-1.33485e+09	1.90236e+10	1.91295e+10	1.55147e+09	-3.3593e+10	-1.65791e+10	0	1.05363	0.949615	0.993409	0	6	1.45769	1.44317	0.993409	0	6
11.5365	8.70861	17.9443	5.83341	2.72535	35.9971	0	-5.35342e+109	7.23101e+109	1.4775e+110	6.428e+109	-1.13684e+109	-4.39393e+109	3.4067e+110	1.05434	0.948927	0.948927	0	6	1.08587	0.992293	0.992293	0	6		3.23126	2.98541	7.52616	3.74035	5.2042	9.97384	1.97293	-1.15792e+09	2.70854e+10	2.45655e+10	1.89379e+09	-3.78817e+10	-1.95775e+10	3.99091e+09	1.05434	0.948927	0.993409	0	6	0.999501	0.977946	0.977946	0	6
26.8596	20.8317	37.7802	9.57403	-1.70805	83.5207	0	-6.4663e+109	-2.4205e+110	-2.42887e+110	8.45331e+109	1.5835e+109	-4.3602e+109	0	1.04711	0.962282	0.962282	0	6	1.45769	0.966143	0.966143	0	6		3.17693	4.04374	7.04568	3.71927	5.35395	9.70943	2.2181	-1.49781e+09	2.13462e+10	2.1464e+10	1.74093e+09	-3.76946e+10	-1.86038e+10	0	1.04711	0.962282	0.993409	0	6	1.45769	1.44317	0.993409	0	6
24.7788	19.4127	34.448	8.96267	-0.959063	76.9319	0	-1.32324e+110	2.84367e+107	-2.11648e+110	1.9813e+109	-1.58995e+110	-9.17318e+109	1.07619e+109	1.04823	0.961201	0.961201	0	6	0.999501	0.916266	0.916266	0	6		3.12638	4.02066	6.25332	3.62035	5.49692	9.48494	1.76198	-1.29929e+09	3.03924e+10	2.75637e+10	2.12504e+09	-4.2507e+10	-2.19682e+10	4.47822e+09	1.04823	0.961201	0.993409	0	6	0.999501	0.977946	0.977946	0	6
13.2252	11.4698	18.7155	6.52838	2.91712	40.9222	0	2.69768e+110	6.46052e+110	8.01597e+110	-6.27208e+109	-1.84938e+110	-4.9808e+109	3.45757e+111	1.05681	0.953076	0.953076	0	6	1.45769	0.966143	0.966143	0	6		3.1456	4.42819	5.8615	4.01141	5.92422	9.42006	1.72839	-1.68068e+09	2.39524e+10	2.40836e+10	1.95352e+09	-4.22972e+10	-2.08757e+10	0	1.05681	0.953076	0.993409	0	6	1.45769	1.44317	0.993409	0	6
5.52025	5.89642	9.58142	4.21382	5.82751	17.6233	0	-8.90053e+110	1.20222e+111	2.45647e+111	1.06871e+111	-1.89009e+110	-7.30529e+110	5.66393e+111	1.01169	0.999472	0.999472	0	6	1.08587	0.992293	0.992293	0	6		2.82572	4.12126	6.38054	3.5149	6.63289	9.11129	1.29132	-1.45792e+09	3.41031e+10	3.0928e+10	2.38453e+09	-4.76972e+10	-2.4651e+10	5.02504e+09	1.01169	0.999472	0.993409	0	6	0.999501	0.977946	0.977946	0	6
9.89297	9.5512	14.2187	5.10258	5.18609	31.1833	0	-1.07508e+111	-4.02429e+111	-4.03822e+111	1.40544e+111	2.63271e+110	-7.24921e+110	0	1.06486	0.940019	0.940019	0	6	1.45769	0.966143	0.966143	0	6		2.69846	4.54516	5.08804	3.30116	7.33276	8.68104	1.39968	-1.88587e+09	2.68769e+10	2.70231e+10	2.19208e+09	-4.74617e+10	-2.3425e+10	0	1.06486	0.940019	0.993409	0	6	1.45769	1.44317	0.993409	0	6
7.04162	7.49461	9.53179	4.28547	6.68757	22.0613	0	-2.2e+111	4.72785e+108	-3.51883e+111	3.29408e+110	-2.64343e+111	-1.52512e+111	1.78927e+110	1.07746	0.926071	0.926071	0	6	0.999501	0.916266	0.916266	0	6		2.7526	4.5475	4.17027	3.20249	7.96783	8.61505	1.13645	-1.63592e+09	3.82671e+10	3.47032e+10	2.67571e+09	-5.35212e+10	-2.76613e+10	5.63864e+09	1.07746	0.926071	0.993409	0	6	0.999501	0.977946	0.977946	0	6
6.56736	7.46662	9.4784	4.20455	7.43585	20.788	0	4.48513e+111	1.07412e+112	1.33272e+112	-1.04279e+111	-3.07476e+111	-8.28101e+110	5.74851e+112	1.08368	0.91971	0.91971	0	6	1.45769	0.966143	0.966143	0	6		2.58096	4.72714	4.49454	3.19806	8.62578	8.29072	1.04574	-2.11612e+09	3.01585e+10	3.03216e+10	2.45977e+09	-5.32569e+10	-2.62856e+10	0	1.08368	0.91971	0.993409	0	6	1.45769	1.44317	0.993409	0	6
6.60354	7.51243	8.59119	4.27254	7.94101	20.3512	0	-1.47979e+112	1.99879e+112	4.08409e+112	1.77683e+112	-3.14244e+111	-1.21457e+112	9.41678e+112	1.08394	0.920326	0.920326	0	6	1.08587	0.992293	0.992293	0	6		2.71524	4.80593	3.65443	3.29919	9.10117	8.19066	0.758769	-1.83566e+09	4.29395e+10	3.89394e+10	3.00245e+09	-6.00563e+10	-3.10392e+10	6.32716e+09	1.08394	0.920326	0.993409	0	6	0.999501	0.977946	0.977946	0	6
5.75475	6.93175	6.17166	3.95476	8.8972	17.4917	0	-1.78741e+112	-6.69073e+112	-6.71389e+112	2.33666e+112	4.37711e+111	-1.20525e+112	0	1.07867	0.927442	0.927442	0	6	1.45769	0.966143	0.966143	0	6		2.74052	4.82508	2.32585	3.2023	9.79643	8.07197	0.544811	-2.37449e+09	3.38409e+10	3.40229e+10	2.76014e+09	-5.97598e+10	-2.94956e+10	0	1.07867	0.927442	0.993409	0	6	1.45769	1.44317	0.993409	0	6
6.06013	7.30157	6.91423	4.16498	9.4211	18.9136	0	-3.65769e+112	7.86047e+109	-5.85037e+112	5.4767e+111	-4.39493e+112	-2.53565e+112	2.97481e+111	1.08466	0.923319	0.923319	0	6	0.999501	0.916266	0.916266	0	6		2.57789	4.83952	2.40926	3.30257	10.4596	8.05522	0.430855	-2.05979e+09	4.81824e+10	4.36929e+10	3.36908e+09	-6.73895e+10	-3.48297e+10	7.09977e+09	1.08466	0.923319	0.993409	0	6	0.999501	0.977946	0.977946	0	6
8.11503	8.57514	9.2537	4.47279	8.98529	23.9463	0	7.45692e+112	1.78581e+113	2.21577e+113	-1.73373e+112	-5.11206e+112	-1.37679e+112	9.5574e+113	1.07914	0.927732	0.927732	0	6	1.45769	0.966143	0.966143	0	6		2.94365	4.86548	2.44645	3.20501	10.5267	7.8659	0.22802	-2.66442e+09	3.79729e+10	3.81761e+10	3.0972e+09	-6.70569e+10	-3.30975e+10	0	1.07914	0.927732	0.993409	0	6	1.45769	1.44317	0.993409	0	6
6.58513	7.11329	7.23427	4.04977	9.52111	18.4048	0	-2.46028e+113	3.32317e+113	6.79016e+113	2.95413e+113	-5.22458e+112	-2.01933e+113	1.56562e+114	1.08526	0.924402	0.924402	0	6	1.08587	0.992293	0.992293	0	6		3.13284	4.63951	2.69585	3.20278	10.5502	7.6677	0.223045	-2.31128e+09	5.40656e+10	4.90269e+10	3.78049e+09	-7.56182e+10	-3.9083e+10	7.96672e+09	1.08526	0.924402	0.993409	0	6	0.999501	0.977946	0.977946	0	6
7.78044	7.97106	8.25105	4.28444	9.38072	21.3847	0	-2.97173e+113	-1.11239e+114	-1.11624e+114	3.8849e+113	7.27732e+112	-2.00383e+113	0	1.08516	0.922172	0.922172	0	6	1.45769	0.966143	0.966143	0	6		3.35523	4.81066	2.45672	3.19618	10.6999	7.6127	0.306495	-2.98974e+09	4.26095e+10	4.28365e+10	3.47541e+09	-7.52449e+10	-3.71393e+10	0	1.08516	0.922172	0.993409	0	6	1.45769	1.44317	0.993409	0	6
6.72724	6.89817	8.03788	3.86071	9.56101	18.3386	0	-6.08122e+113	1.30687e+111	-9.72675e+113	9.10549e+112	-7.30696e+113	-4.21574e+113	4.94589e+112	1.08553	0.923414	0.923414	0	6	0.999501	0.916266	0.916266	0	6		3.20342	4.37659	3.41301	2.99533	10.6115	7.3761	0.218118	-2.59349e+09	6.06673e+10	5.50122e+10	4.24213e+09	-8.48518e+10	-4.38557e+10	8.93953e+09	1.08553	0.923414	0.993409	0	6	0.999501	0.977946	0.977946	0	6
5.25224	5.4922	6.16133	3.34494	9.9361	14.0419	0	1.23978e+114	2.96907e+114	3.68391e+114	-2.88247e+113	-8.49925e+113	-2.28904e+113	1.589e+115	1.09805	0.915336	0.915336	0	6	1.45769	0.966143	0.966143	0	6		3.06787	3.96722	3.37808	2.79925	10.5878	7.21416	0.420563	-3.35479e+09	4.78123e+10	4.80661e+10	3.89982e+09	-8.44329e+10	-4.16747e+10	0	1.09805	0.915336	0.993409	0	6	1.45769	1.44317	0.993409	0	6
5.24443	5.0182	5.3489	3.17983	10.0297	13.7952	0	-4.09043e+114	5.52506e+114	1.12892e+115	4.9115e+114	-8.68632e+113	-3.35731e+114	2.60298e+115	1.11096	0.906261	0.906261	0	6	1.08587	0.992293	0.992293	0	6		3.3736	3.75749	3.06471	2.70143	10.5885	7.90913	0.657881	-2.91017e+09	6.80751e+10	6.17284e+10	4.76015e+09	-9.52129e+10	-4.92112e+10	1.00311e+10	1.11096	0.906261	0.993409	0	6	0.999501	0.977946	0.977946	0	6
5.015	5.25404	5.71871	2.92409	9.97591	12.933	0	-4.94076e+114	-1.84945e+115	-1.85585e+115	6.45899e+114	1.20992e+114	-3.33154e+114	0	1.11794	0.903248	0.903248	0	6	1.45769	0.966143	0.966143	0	6		3.42014	4.23597	3.89579	2.50249	10.4531	7.86738	0.950968	-3.76442e+09	5.36505e+10	5.39342e+10	4.37604e+09	-9.47429e+10	-4.67639e+10	0	1.11794	0.903248	0.993409	0	6	1.45769	1.44317	0.993409	0	6
4.1381	5.32318	5.62109	2.78201	9.99118	10.8604	0	-1.01106e+115	2.17279e+112	-1.61716e+115	1.51387e+114	-1.21485e+115	-7.00903e+114	8.22297e+113	1.13399	0.902408	0.902408	0	6	0.999501	0.916266	0.916266	0	6		3.1786	4.75362	4.6186	2.51794	10.2788	7.77653	0.904212	-3.26551e+09	7.63875e+10	6.92648e+10	5.34142e+09	-1.06839e+11	-5.52208e+10	1.12561e+10	1.13399	0.902408	0.993409	0	6	0.999501	0.977946	0.977946	0	6
4.40855	4.82062	4.66162	2.80038	9.97868	11.9517	0	2.06124e+115	4.93634e+115	6.12483e+115	-4.79236e+114	-1.41307e+115	-3.80572e+114	2.64185e+116	1.13239	0.905882	0.905882	0	6	1.45769	0.966143	0.966143	0	6		3.01312	3.90002	3.0012	2.43875	10.3957	7.54467	0.697324	-4.22408e+09	6.02015e+10	6.05189e+10	4.91043e+09	-1.06312e+11	-5.24746e+10	0	1.13239	0.905882	0.993409	0	6	1.45769	1.44317	0.993409	0	6
5.57049	5.38605	7.02871	3.03868	9.6456	14.6699	0	-6.8007e+115	9.18589e+115	1.87693e+116	8.1658e+115	-1.44418e+115	-5.58182e+115	4.32769e+116	1.14014	0.914812	0.914812	0	6	1.08587	0.992293	0.992293	0	6		3.26019	3.85169	4.25726	2.44244	10.336	7.38218	1.01272	-3.66424e+09	8.5715e+10	7.77215e+10	5.99368e+09	-1.19885e+11	-6.19641e+10	1.26306e+10	1.14014	0.914812	0.993409	0	6	0.999501	0.977946	0.977946	0	6
5.7036	4.96583	6.85381	3.03593	9.58725	14.2432	0	-8.21444e+115	-3.07487e+116	-3.08551e+116	1.07386e+116	2.0116e+115	-5.53897e+115	0	1.13883	0.915976	0.915976	0	6	1.45769	0.966143	0.966143	0	6		3.50049	3.51086	4.22895	2.46536	10.2457	7.28662	1.04569	-4.73986e+09	6.75526e+10	6.79077e+10	5.51007e+09	-1.19294e+11	-5.88826e+10	0	1.13883	0.915976	0.993409	0	6	1.45769	1.44317	0.993409	0	6
5.83242	4.70204	6.87419	3.12243	9.56984	15.1144	0	-1.68097e+116	3.61245e+113	-2.68867e+116	2.51694e+115	-2.01979e+116	-1.16531e+116	1.36714e+115	1.1367	0.918758	0.918758	0	6	0.999501	0.916266	0.916266	0	6		3.37412	3.08689	3.9636	2.48374	10.3047	7.34497	1.20265	-4.11167e+09	9.61816e+10	8.72108e+10	6.72559e+09	-1.34525e+11	-6.9531e+10	1.41729e+10	1.1367	0.918758	0.993409	0	6	0.999501	0.977946	0.977946	0	6
6.16619	4.83294	7.03188	3.22477	9.31897	16.0652	0	3.42699e+116	8.2071e+116	1.01831e+117	-7.96773e+115	-2.34936e+116	-6.32734e+115	4.39231e+117	1.13458	0.918233	0.918233	0	6	1.45769	0.966143	0.966143	0	6		3.3877	3.0103	3.7485	2.50219	10.1496	7.28145	1.3573	-5.31863e+09	7.58013e+10	7.61988e+10	6.18293e+09	-1.33861e+11	-6.60731e+10	0	1.13458	0.918233	0.993409	0	6	1.45769	1.44317	0.993409	0	6
5.82541	4.63078	5.59007	3.06649	9.37448	14.9584	0	-1.13068e+117	1.52723e+117	3.12057e+117	1.35764e+117	-2.40107e+116	-9.28026e+116	7.19516e+117	1.1325	0.917746	0.917746	0	6	1.08587	0.992293	0.992293	0	6		3.36955	3.05336	2.76163	2.41965	10.1091	7.16617	1.40744	-4.61374e+09	1.07926e+11	9.7859e+10	7.54688e+09	-1.50952e+11	-7.80219e+10	1.59036e+10	1.1325	0.917746	0.993409	0	6	0.999501	0.977946	0.977946	0	6
4.47631	3.94045	4.0434	2.49388	9.72829	11.0861	0	-1.36572e+117	-5.11224e+117	-5.12994e+117	1.78539e+117	3.34445e+116	-9.20902e+116	0	1.13982	0.914688	0.914688	0	6	1.45769	0.966143	0.966143	0	6		3.21931	3.22705	2.8019	2.13998	10.1056	7.0184	1.40723	-5.96808e+09	8.50574e+10	8.55024e+10	6.93796e+09	-1.50206e+11	-7.41418e+10	0	1.13982	0.914688	0.993409	0	6	1.45769	1.44317	0.993409	0	6
3.68702	3.8213	2.95493	2.40181	9.86534	9.80682	0	-2.79476e+117	6.00601e+114	-4.47014e+117	4.18463e+116	-3.35807e+117	-1.93743e+117	2.27299e+116	1.16955	0.928513	0.928513	0	6	0.999501	0.916266	0.916266	0	6		2.88977	3.44286	2.32992	2.15936	10.1057	7.16429	1.44686	-5.17711e+09	1.21105e+11	1.09808e+11	8.46846e+09	-1.69385e+11	-8.75496e+10	1.78456e+10	1.16955	0.928513	0.993409	0	6	0.999501	0.977946	0.977946	0	6
4.79383	4.88123	4.94586	2.61124	9.5065	13.2826	0	5.69767e+117	1.3645e+118	1.69302e+118	-1.3247e+117	-3.90602e+117	-1.05198e+117	7.3026e+118	1.16687	0.928766	0.928766	0	6	1.45769	0.966143	0.966143	0	6		2.91812	3.71317	2.86612	2.10828	10.0681	7.30016	1.37529	-6.69683e+09	9.54437e+10	9.59421e+10	7.7852e+09	-1.68548e+11	-8.31957e+10	0	1.16687	0.928766	0.993409	0	6	1.45769	1.44317	0.993409	0	6
4.58004	4.66806	4.47869	2.8155	9.5512	12.9694	0	-1.87985e+118	2.53916e+118	5.18822e+118	2.25719e+118	-3.99199e+117	-1.54292e+118	1.19626e+119	1.17301	0.931327	0.931327	0	6	1.08587	0.992293	0.992293	0	6		2.87687	3.61631	2.60968	2.35666	10.0612	7.52974	1.32124	-5.80928e+09	1.35893e+11	1.23215e+11	9.50258e+09	-1.90068e+11	-9.82408e+10	2.00248e+10	1.17301	0.931327	0.993409	0	6	0.999501	0.977946	0.977946	0	6
5.2022	4.93598	4.82644	3.14815	9.55226	15.5578	0	-2.27063e+118	-8.49955e+118	-8.52897e+118	2.96837e+118	5.56045e+117	-1.53108e+118	0	1.14625	0.92144	0.92144	0	6	1.45769	0.966143	0.966143	0	6		2.73625	3.32937	1.93654	2.50416	10.2896	7.75275	1.27454	-7.51457e+09	1.07098e+11	1.07657e+11	8.73589e+09	-1.8913e+11	-9.33552e+10	0	1.14625	0.92144	0.993409	0	6	1.45769	1.44317	0.993409	0	6
6.14401	4.91086	6.01246	3.06696	9.6413	18.0056	0	-4.64653e+118	9.98552e+115	-7.432e+118	6.95731e+117	-5.58309e+118	-3.22115e+118	3.77905e+117	1.13241	0.91386	0.91386	0	6	0.999501	0.916266	0.916266	0	6		2.98631	2.80514	2.20567	2.25409	10.5848	8.05199	1.28699	-6.51865e+09	1.52487e+11	1.3826e+11	1.0663e+10	-2.13278e+11	-1.10238e+11	2.24701e+10	1.13241	0.91386	0.993409	0	6	0.999501	0.977946	0.977946	0	6
6.04923	4.72975	6.75336	2.88895	9.90992	18.0238	0	9.47288e+118	2.2686e+119	2.8148e+119	-2.20244e+118	-6.49409e+118	-1.749e+118	1.21412e+120	1.15701	0.923981	0.923981	0	6	1.45769	0.966143	0.966143	0	6		3.01469	2.76854	3.23185	2.09264	10.8175	8.4057	1.63953	-8.43218e+09	1.20176e+11	1.20802e+11	9.80268e+09	-2.12225e+11	-1.04755e+11	0	1.15701	0.923981	0.993409	0	6	1.45769	1.44317	0.993409	0	6
5.83788	4.18397	5.6898	3.00934	10.1881	18.089	0	-3.12541e+119	4.22158e+119	8.62586e+119	3.75277e+119	-6.63703e+118	-2.56525e+119	1.98888e+120	1.17427	0.930776	0.930776	0	6	1.08587	0.992293	0.992293	0	6		2.92727	2.32934	2.37015	2.23912	11.0589	8.84138	1.76093	-7.31464e+09	1.71108e+11	1.55142e+11	1.19651e+10	-2.39322e+11	-1.23699e+11	2.5214e+10	1.17427	0.930776	0.993409	0	6	0.999501	0.977946	0.977946	0	6
6.96725	5.69112	7.48787	3.29968	10.0471	22.71	0	-3.77513e+119	-1.41312e+120	-1.41802e+120	4.93518e+119	9.24473e+118	-2.54556e+119	0	1.15701	0.923981	0.923981	0	6	1.45769	0.966143	0.966143	0	6		2.61162	2.8219	2.31436	2.16985	11.349	8.95051	1.90867	-9.46184e+09	1.34851e+11	1.35552e+11	1.09997e+10	-2.38141e+11	-1.17548e+11	0	1.15701	0.923981	0.993409	0	6	1.45769	1.44317	0.993409	0	6
6.43631	5.66552	6.8963	3.18238	10.3995	20.9589	0	-7.72527e+119	1.66018e+117	-1.23564e+120	1.15671e+119	-9.28238e+119	-5.35545e+119	6.283e+118	1.16499	0.9239	0.9239	0	6	0.999501	0.916266	0.916266	0	6		2.70661	3.21503	2.48031	2.21336	11.5144	9.17126	1.67218	-8.20784e+09	1.92002e+11	1.74086e+11	1.34262e+10	-2.68546e+11	-1.38805e+11	2.8293e+10	1.16499	0.9239	0.993409	0	6	0.999501	0.977946	0.977946	0	6
6.2895	5.48782	5.86338	2.97102	10.7474	20.5548	0	1.57495e+120	3.77175e+120	4.67985e+120	-3.66174e+119	-1.0797e+120	-2.90787e+119	2.01858e+121	1.16147	0.920081	0.920081	0	6	1.45769	0.966143	0.966143	0	6		2.75232	3.14789	1.64041	2.05588	11.8045	9.38905	1.48664	-1.06172e+10	1.51318e+11	1.52103e+11	1.2343e+10	-2.67221e+11	-1.31902e+11	0	1.16147	0.920081	0.993409	0	6	1.45769	1.44317	0.993409	0	6
6.63971	5.84212	7.58041	3.01266	10.8011	22.0272	0	-5.19627e+120	7.01874e+120	1.43412e+121	6.23931e+120	-1.10346e+120	-4.26495e+120	3.30669e+121	1.18142	0.932024	0.932024	0	6	1.08587	0.992293	0.992293	0	6		2.67467	3.20894	2.82406	1.98934	11.9859	9.51963	1.57834	-9.21011e+09	2.15448e+11	195342472548	1.50657e+10	-3.01339e+11	-1.55755e+11	3.1748e+10	1.18142	0.932024	0.993409	0	6	0.999501	0.977946	0.977946	0	6
6.92484	5.71731	8.21813	3.07254	10.989	22.6167	0	-6.27648e+120	-2.34944e+121	-2.35757e+121	8.20517e+120	1.53702e+120	-4.23221e+120	0	1.19025	0.937354	0.937354	0	6	1.45769	0.966143	0.966143	0	6		2.86417	3.01189	3.32777	2.02668	12.2023	9.815	1.55697	-1.19137e+10	1.69796e+11	1.70676e+11	1.38502e+10	-2.99852e+11	-1.4801e+11	0	1.19025	0.937354	0.993409	0	6	1.45769	1.44317	0.993409	0	6
7.21305	6.11242	8.35565	3.2015	11.1261	24.0434	0	-1.28439e+121	2.7602e+118	-2.05435e+121	1.92314e+120	-1.54328e+121	-8.90391e+120	1.0446e+120	1.18549	0.934117	0.934117	0	6	0.999501	0.916266	0.916266	0	6		2.77582	3.14597	2.98963	2.0611	12.4517	10.063	1.63806	-1.03348e+10	2.41757e+11	2.19195e+11	1.69055e+10	-3.38137e+11	-1.74776e+11	3.56248e+10	1.18549	0.934117	0.993409	0	6	0.999501	0.977946	0.977946	0	6
8.27939	7.22876	9.73333	3.22521	10.9524	27.8357	0	2.61849e+121	6.27087e+121	7.78066e+121	-6.08797e+120	-1.7951e+121	-4.83459e+120	3.35607e+122	1.18015	0.931225	0.931225	0	6	1.45769	0.966143	0.966143	0	6		2.66465	3.40437	2.78822	1.79937	12.6289	10.2051	1.57752	-1.33685e+10	1.9053e+11	1.91517e+11	1.55416e+10	-3.36468e+11	-1.66084e+11	0	1.18015	0.931225	0.993409	0	6	1.45769	1.44317	0.993409	0	6
12.1	10.4328	15.1744	4.06493	9.98707	40.9565	0	-8.63926e+121	1.16693e+122	2.38436e+122	1.03734e+122	-1.83461e+121	-7.09085e+121	5.49767e+122	1.21313	0.956376	0.956376	0	6	1.08587	0.992293	0.992293	0	6		2.37454	3.64125	2.77493	1.63619	12.8884	10.5613	1.58262	-1.15968e+10	2.71278e+11	2.45961e+11	1.89699e+10	-3.79428e+11	-1.96118e+11	3.99751e+10	1.21313	0.956376	0.993409	0	6	0.999501	0.977946	0.977946	0	6
-19.5567	-13.163	-27.4711	-3.76708	19.7552	-57.6344	10.6725	-1.04352e+122	-3.90616e+122	-3.91967e+122	1.36418e+122	2.55543e+121	-7.03642e+121	0	1.20918	0.974446	0.974446	0	6	1.45769	0.966143	0.966143	0	6		2.55478	3.01984	2.36283	1.57253	13.1698	10.8333	1.57288	-1.5001e+10	2.13796e+11	2.14903e+11	1.74394e+10	-3.77555e+11	-1.86365e+11	0	1.20918	0.974446	0.993409	0	6	1.45769	1.44317	0.993409	0	6
-2.65514	-0.768559	-4.61312	0.506706	14.8323	-4.8243	2.51735	-2.13542e+122	4.58907e+119	-3.41554e+122	3.19738e+121	-2.56583e+122	-1.48035e+122	1.73674e+121	1.23305	0.985136	0.985136	0	6	0.999501	0.916266	0.916266	0	6		2.48107	3.20736	2.79559	1.69394	13.3058	10.8945	1.8448	-1.30129e+10	3.04405e+11	2.75995e+11	2.12864e+10	-4.25761e+11	-2.20067e+11	4.48567e+10	1.23305	0.985136	0.993409	0	6	0.999501	0.977946	0.977946	0	6
126.37	93.2202	167.258	32.0477	-23.5023	396.343	0	4.35347e+122	1.04259e+123	1.2936e+123	-1.01218e+122	-2.9845e+122	-8.03793e+121	5.57976e+123	1.218	0.968581	0.968581	0	6	1.45769	0.966143	0.966143	0	6		2.36759	3.98044	3.31713	1.72869	13.452	11.0596	1.70444	-1.68328e+10	2.39904e+11	2.41144e+11	1.95691e+10	-4.2366e+11	-2.09123e+11	0	1.218	0.968581	0.993409	0	6	1.45769	1.44317	0.993409	0	6
33.1708	26.7682	44.0396	8.86006	4.3545	107.322	0	-1.43635e+123	1.94012e+123	3.9642e+123	1.72467e+123	-3.05019e+122	-1.17892e+123	9.14035e+123	1.21757	0.963968	0.963968	0	6	1.08587	0.992293	0.992293	0	6		2.2598	4.65595	3.46893	1.26932	13.5684	11.164	1.37775	-1.46019e+10	3.41577e+11	3.09696e+11	2.38858e+10	-4.77753e+11	-2.46941e+11	5.03343e+10	1.21757	0.963968	0.993409	0	6	0.999501	0.977946	0.977946	0	6
1.87605	4.19172	2.71373	1.33477	13.7214	9.94546	0.284685	-1.73494e+123	-6.49433e+123	-6.5168e+123	2.26807e+123	4.24862e+122	-1.16987e+123	0	1.3313	0.987411	0.987411	0	6	1.45769	0.966143	0.966143	0	6		2.30848	4.68947	3.69999	1.39446	13.5954	11.1276	1.32073	-1.88883e+10	2.69199e+11	2.7059e+11	2.19587e+10	-4.75394e+11	-2.34661e+11	0	1.3313	0.987411	0.993409	0	6	1.45769	1.44317	0.993409	0	6
0.19778	3.37516	0.647076	0.751017	14.2882	4.81135	1.09653	-3.55032e+123	7.62972e+120	-5.67863e+123	5.31593e+122	-4.26592e+123	-2.46122e+123	2.88749e+122	1.28852	0.998815	0.998815	0	6	0.999501	0.916266	0.916266	0	6		2.2962	5.05717	3.80913	1.2209	13.6657	11.1784	1.23249	-1.6385e+10	3.83288e+11	3.47513e+11	2.68026e+10	-5.36093e+11	-2.77097e+11	5.64809e+10	1.28852	0.998815	0.993409	0	6	0.999501	0.977946	0.977946	0	6
1.79916	4.74131	3.59221	1.29439	13.8165	10.1659	0.25938	7.23802e+123	1.73339e+124	2.15073e+124	-1.68283e+123	-4.962e+123	-1.33638e+123	9.27684e+124	1.34808	0.985329	0.985329	0	6	1.45769	0.966143	0.966143	0	6		2.17508	5.17499	4.45388	1.34577	13.7071	11.1913	1.17388	-2.11948e+10	3.02072e+11	3.03632e+11	2.46402e+10	-5.33447e+11	-2.63316e+11	0	1.34808	0.985329	0.993409	0	6	1.45769	1.44317	0.993409	0	6
0.977671	4.45196	1.42858	0.967576	14.1078	6.89734	0.745622	-2.38806e+124	3.22562e+124	6.59084e+124	2.86741e+124	-5.07121e+123	-1.96005e+124	1.51966e+125	1.30669	0.993415	0.993415	0	6	1.08587	0.992293	0.992293	0	6		2.36182	5.58953	3.57946	1.27022	13.6977	11.0709	1.03293	-1.83858e+10	4.30093e+11	3.89948e+11	3.00755e+10	-6.01558e+11	-3.10934e+11	6.3378e+10	1.30669	0.993415	0.993409	0	6	0.999501	0.977946	0.977946	0	6
1.55851	4.67975	2.07722	0.943951	14.0243	9.10037	0.437821	-2.88449e+124	-1.07974e+125	-1.08348e+125	3.77086e+124	7.0637e+123	-1.945e+124	0	1.33488	0.986681	0.986681	0	6	1.45769	0.966143	0.966143	0	6		2.29893	5.33389	3.33233	1.09416	13.8058	11.2912	0.908024	-2.3783e+10	3.38959e+11	3.40708e+11	2.76492e+10	-5.98588e+11	-2.95472e+11	0	1.33488	0.986681	0.993409	0	6	1.45769	1.44317	0.993409	0	6
2.63268	5.48527	3.57572	1.01141	13.7188	12.2632	0	-5.90271e+124	1.26851e+122	-9.44122e+124	8.8382e+123	-7.09247e+124	-4.09199e+124	4.8007e+123	1.4022	0.979787	0.979787	0	6	0.999501	0.916266	0.916266	0	6		2.36345	5.4542	3.56216	0.907996	13.8008	11.2996	1.10325	-2.0631e+10	4.82613e+11	4.37565e+11	3.37482e+10	-6.75017e+11	-3.48904e+11	7.11174e+10	1.4022	0.979787	0.993409	0	6	0.999501	0.977946	0.977946	0	6
3.29194	5.33527	4.57539	1.21967	13.591	13.4279	0	1.20338e+125	2.88192e+125	3.57577e+125	-2.79786e+124	-8.24975e+124	-2.22184e+124	1.54236e+126	1.47446	0.984878	0.984878	0	6	1.45769	0.966143	0.966143	0	6		2.63492	5.09087	4.08982	1.01932	13.7851	11.278	1.16694	-2.66872e+10	3.80351e+11	3.82312e+11	3.10256e+10	-6.71685e+11	-3.31553e+11	0	1.47446	0.984878	0.993409	0	6	1.45769	1.44317	0.993409	0	6
3.10983	5.09007	3.93349	0.99837	13.6419	13.0834	0	-3.97036e+125	5.36287e+125	1.09578e+126	4.76732e+125	-8.43133e+124	-3.25876e+125	2.52657e+126	1.42843	0.980324	0.980324	0	6	1.08587	0.992293	0.992293	0	6		2.59665	4.91967	3.64868	0.830285	13.7958	11.3515	1.27192	-2.31503e+10	5.41547e+11	4.90997e+11	3.78694e+10	-7.57446e+11	-3.91511e+11	7.98019e+10	1.42843	0.980324	0.993409	0	6	0.999501	0.977946	0.977946	0	6
3.41632	4.9992	3.90825	1.1376	13.5728	13.3626	0	-4.79572e+125	-1.79516e+126	-1.80137e+126	6.26939e+125	1.1744e+125	-3.23374e+125	0	1.49596	0.992273	0.992273	0	6	1.45769	0.966143	0.966143	0	6		2.80154	4.86574	3.58852	0.936938	13.7527	11.3236	1.47338	-2.99461e+10	4.26797e+11	4.28997e+11	3.48143e+10	-7.53707e+11	-3.72041e+11	0	1.49596	0.992273	0.993409	0	6	1.45769	1.44317	0.993409	0	6
3.11655	4.85697	2.54292	0.937961	13.465	13.1018	0	-9.81377e+125	2.10901e+123	-1.56969e+126	1.46943e+125	-1.17918e+126	-6.80328e+125	7.98159e+124	1.45228	0.984505	0.984505	0	6	0.999501	0.916266	0.916266	0	6		2.5414	4.6936	2.25242	0.747134	13.6366	11.1602	1.46722	-2.59773e+10	6.07677e+11	5.50954e+11	4.24938e+10	-8.49941e+11	-4.3932e+11	8.95469e+10	1.45228	0.984505	0.993409	0	6	0.999501	0.977946	0.977946	0	6
3.08078	4.64623	1.06551	0.817182	13.5339	12.6659	0	2.00073e+126	4.79144e+126	5.94504e+126	-4.65169e+125	-1.37159e+126	-3.69401e+125	2.5643e+127	1.53156	0.997925	0.997925	0	6	1.45769	0.966143	0.966143	0	6		2.63471	4.68068	1.02476	0.652625	13.6623	11.1447	1.60991	-3.36029e+10	4.78915e+11	4.81383e+11	3.90656e+10	-8.45745e+11	-4.17473e+11	0	1.53156	0.997925	0.993409	0	6	1.45769	1.44317	0.993409	0	6
1.78074	4.03935	-0.920177	0.551904	13.7161	9.19947	0.508284	-6.60107e+126	8.91624e+126	1.82184e+127	7.92609e+126	-1.40178e+126	-5.41797e+126	4.20065e+127	1.57049	0.998346	0.998346	0	6	1.08587	0.992293	0.992293	0	6		2.46619	4.46309	0.400091	0.660601	13.5344	10.9824	1.68401	-2.91495e+10	6.81884e+11	6.18232e+11	4.76829e+10	-9.53731e+11	-4.92968e+11	1.00482e+11	1.57049	0.998346	0.993409	0	6	0.999501	0.977946	0.977946	0	6
2.0742	4.23314	-1.74978	0.750549	13.7069	8.98934	0.530919	-7.97331e+126	-2.98461e+127	-2.99494e+127	1.04234e+127	1.95255e+126	-5.37638e+126	0	1.56276	0.9985	0.9985	0	6	1.45769	0.966143	0.966143	0	6		2.80798	4.70247	-0.339809	0.868153	13.511	10.9118	1.76145	-3.77063e+10	5.37397e+11	5.40166e+11	4.38361e+10	-9.49023e+11	-4.68453e+11	0	1.56276	0.9985	0.993409	0	6	1.45769	1.44317	0.993409	0	6
3.41006	4.54363	-0.820667	0.783673	13.267	13.0429	0	-1.63163e+127	3.50641e+124	-2.60974e+127	2.44305e+126	-1.9605e+127	-1.13111e+127	1.32701e+126	1.47383	0.988576	0.988576	0	6	0.999501	0.916266	0.916266	0	6		2.81403	4.40742	-1.0916	0.583553	13.4435	11.0332	1.60056	-3.2709e+10	7.65151e+11	6.93726e+11	5.35057e+10	-1.0702e+12	-5.53167e+11	1.12752e+11	1.47383	0.988576	0.993409	0	6	0.999501	0.977946	0.977946	0	6
2.32675	4.19221	-1.9536	0.376258	13.6285	9.20903	0.577819	3.32639e+127	7.96619e+127	9.88415e+127	-7.73384e+126	-2.28039e+127	-6.14161e+126	4.26338e+128	1.59423	0.993027	0.993027	0	6	1.45769	0.966143	0.966143	0	6		3.04086	4.47268	-0.599481	0.484228	13.4507	10.965	1.89576	-4.23108e+10	6.03021e+11	6.06127e+11	4.91892e+10	-1.06491e+12	-5.25658e+11	0	1.59423	0.993027	0.993409	0	6	1.45769	1.44317	0.993409	0	6
2.34991	4.13104	-1.81049	0.293796	13.5787	9.41368	0.644781	-1.09749e+128	1.4824e+128	3.02896e+128	1.31778e+128	-2.33059e+127	-9.00784e+127	6.98395e+128	1.63409	0.992585	0.992585	0	6	1.08587	0.992293	0.992293	0	6		3.02162	4.07059	-0.618044	0.389857	13.4331	10.8884	1.93866	-3.67033e+10	8.58587e+11	7.78439e+11	6.00396e+10	-1.20088e+12	-6.20718e+11	1.26521e+11	1.63409	0.992585	0.993409	0	6	0.999501	0.977946	0.977946	0	6
2.74443	4.42728	-2.22708	0.223907	13.4751	9.87366	0.686045	-1.32563e+128	-4.96217e+128	-4.97935e+128	1.73298e+128	3.24628e+127	-8.93869e+127	0	1.67206	0.998341	0.998341	0	6	1.45769	0.966143	0.966143	0	6		3.32622	3.98066	-1.217	0.290241	13.3785	10.8813	2.13754	-4.74775e+10	6.76659e+11	6.80142e+11	5.5196e+10	-1.19495e+12	-5.89849e+11	0	1.67206	0.998341	0.993409	0	6	1.45769	1.44317	0.993409	0	6
4.04069	0.95996	-2.26433	0.566869	13.3129	12.3486	0	-2.71272e+128	5.82971e+125	-4.33892e+128	4.06179e+127	-3.2595e+128	-1.88056e+128	2.20627e+127	1.71431	0.995264	0.995264	0	6	0.999501	0.916266	0.916266	0	6		3.22987	3.63576	-1.53276	0.29193	13.378	10.9023	2.27521	-4.11853e+10	9.63434e+11	8.73497e+11	6.73713e+10	-1.34753e+12	-6.96517e+11	1.41971e+11	1.71431	0.995264	0.993409	0	6	0.999501	0.977946	0.977946	0	6
4.13527	1.01744	-3.59313	0.6762	13.3511	12.3978	0	5.53042e+128	1.32445e+129	1.64333e+129	-1.28582e+128	-3.79136e+128	-1.0211e+128	7.08824e+129	1.71954	0.996003	0.996003	0	6	1.45769	0.966143	0.966143	0	6		3.30272	3.6955	-2.84925	0.391363	13.423	10.8676	2.39865	-5.32752e+10	7.59289e+11	7.63197e+11	6.19362e+10	-1.34088e+12	-6.61879e+11	0	1.71954	0.996003	0.993409	0	6	1.45769	1.44317	0.993409	0	6
2.70188	4.00167	-4.26097	0.248611	13.4985	9.9702	0.715543	-1.82467e+129	2.46462e+129	5.03592e+129	2.19093e+129	-3.8748e+128	-1.49763e+129	1.16114e+130	1.67238	0.997164	0.997164	0	6	1.08587	0.992293	0.992293	0	6		3.23858	3.73182	-3.20483	0.300349	13.4036	10.9138	2.33969	-4.62146e+10	1.08108e+12	9.80163e+11	7.55984e+10	-1.51208e+12	-7.81572e+11	1.59308e+11	1.67238	0.997164	0.993409	0	6	0.999501	0.977946	0.977946	0	6
3.95027	2.52334	-2.62676	0.375921	13.3627	11.7229	0	-2.20398e+129	-8.25005e+129	-8.2786e+129	2.88124e+129	5.39722e+128	-1.48614e+129	0	1.66588	0.997508	0.997508	0	6	1.45769	0.966143	0.966143	0	6		3.55926	3.98288	-1.90677	0.202752	13.3963	10.8853	2.46913	-5.97809e+10	8.52009e+11	8.56393e+11	6.94996e+10	-1.50462e+12	-7.42705e+11	0	1.66588	0.997508	0.993409	0	6	1.45769	1.44317	0.993409	0	6
4.0831	1.97076	-3.10844	0.388858	13.4273	11.5353	0	-4.51014e+129	9.6924e+126	-7.21384e+129	6.75308e+128	-5.4192e+129	-3.1266e+129	3.66811e+128	1.66327	0.985315	0.985315	0	6	0.999501	0.916266	0.916266	0	6		3.64941	4.2338	-2.13476	0.20588	13.4221	10.948	2.5157	-5.18581e+10	1.2131e+12	1.09985e+12	8.48301e+10	-1.69673e+12	-8.77014e+11	1.78762e+11	1.66327	0.985315	0.993409	0	6	0.999501	0.977946	0.977946	0	6
3.61299	2.17726	-3.47144	0.439599	13.2688	11.1595	0	9.19481e+129	2.20201e+130	2.73217e+130	-2.13778e+129	-6.30346e+129	-1.69766e+129	1.17848e+131	1.64458	0.985952	0.985952	0	6	1.45769	0.966143	0.966143	0	6		3.39878	3.55688	-2.59912	0.310078	13.2623	10.7792	2.46837	-6.7081e+10	9.56052e+11	9.60971e+11	7.79866e+10	-1.68835e+12	-8.334e+11	0	1.64458	0.985952	0.993409	0	6	1.45769	1.44317	0.993409	0	6
2.80654	4.07071	-2.71878	0.343024	13.2266	10.5457	0.560758	-3.03367e+130	4.09765e+130	8.37265e+130	3.64261e+130	-6.4422e+129	-2.48995e+130	1.9305e+131	1.61142	1.00012	1.00012	0	6	1.08587	0.992293	0.992293	0	6		3.01252	4.09492	-1.85718	0.308311	13.1993	10.674	2.63975	-5.81907e+10	1.36124e+12	1.23416e+12	9.51892e+10	-1.90392e+12	-9.84111e+11	2.00591e+11	1.61142	1.00012	0.993409	0	6	0.999501	0.977946	0.977946	0	6
2.62213	4.01067	-2.41474	0.127486	13.2534	10.3731	0.638548	-3.66431e+130	-1.37164e+131	-1.37639e+131	4.79031e+130	8.97335e+129	-2.47083e+130	0	1.606	1.00073	1.00073	0	6	1.45769	0.966143	0.966143	0	6		2.88705	3.85294	-1.62411	0.115779	13.2197	10.6284	2.40328	-7.52726e+10	1.0728e+12	1.07832e+12	8.75099e+10	-1.89453e+12	-9.35171e+11	0	1.606	1.00073	0.993409	0	6	1.45769	1.44317	0.993409	0	6
4.29862	-2.79185	-2.77869	0.579227	13.2682	11.1841	0	-7.49849e+130	1.61145e+128	-1.19936e+131	1.12276e+130	-9.0099e+130	-5.19824e+130	6.09856e+129	1.68655	0.97438	0.97438	0	6	0.999501	0.916266	0.916266	0	6		3.09025	4.16151	-0.882967	0.211414	13.1699	10.6027	2.55145	-6.52967e+10	1.52746e+12	1.38487e+12	1.06813e+11	-2.13642e+12	-1.10429e+12	2.25086e+11	1.68655	0.97438	0.993409	0	6	0.999501	0.977946	0.977946	0	6
3.04925	2.42418	-2.1132	0.24925	13.1838	11.0185	0	1.52872e+131	3.66104e+131	4.54248e+131	-3.55425e+130	-1.04801e+131	-2.82251e+130	1.95933e+132	1.64191	0.986832	0.986832	0	6	1.45769	0.966143	0.966143	0	6		2.8069	3.86267	-1.27176	0.115985	13.1798	10.6035	2.41677	-8.44645e+10	1.2038e+12	1.21e+12	9.81962e+10	-2.12588e+12	-1.04937e+12	0	1.64191	0.986832	0.993409	0	6	1.45769	1.44317	0.993409	0	6
3.65984	-1.61803	-2.85797	0.517747	13.16	10.9585	0	-5.04374e+131	6.81271e+131	1.39203e+132	6.05616e+131	-1.07107e+131	-4.13975e+131	3.20963e+132	1.6775	0.974506	0.974506	0	6	1.08587	0.992293	0.992293	0	6		2.70988	3.97933	-1.19358	0.211908	13.0799	10.4718	2.5558	-7.32704e+10	1.71399e+12	1.55398e+12	1.19857e+11	-2.39731e+12	-1.23914e+12	2.52573e+11	1.6775	0.974506	0.993409	0	6	0.999501	0.977946	0.977946	0	6
2.91235	3.35542	-1.80173	0.428459	13.0261	10.7266	0.0769696	-6.09224e+131	-2.28048e+132	-2.28837e+132	7.96431e+131	1.4919e+131	-4.10797e+131	0	1.6334	0.986949	0.986949	0	6	1.45769	0.966143	0.966143	0	6		2.75778	4.47175	-0.975683	0.314785	13.0202	10.399	2.46469	-9.47788e+10	1.35081e+12	1.35775e+12	1.10187e+11	-2.38548e+12	-1.17751e+12	0	1.6334	0.986949	0.993409	0	6	1.45769	1.44317	0.993409	0	6
2.21769	5.00053	-1.32477	0.202262	13.1034	10.0087	0.798336	-1.24669e+132	2.67917e+129	-1.99405e+132	1.86668e+131	-1.49797e+132	-8.64253e+131	1.01394e+131	1.59393	1.00115	1.00115	0	6	0.999501	0.916266	0.916266	0	6		2.58209	4.5648	-0.5917	0.22255	13.0591	10.4551	2.21888	-8.22178e+10	1.92329e+12	1.74374e+12	1.34493e+11	-2.69006e+12	-1.39045e+12	2.83416e+11	1.59393	1.00115	0.993409	0	6	0.999501	0.977946	0.977946	0	6
2.57236	3.38115	-0.957795	0.135646	12.9507	10.6635	0.039062	2.54163e+132	6.08679e+132	7.55226e+132	-5.90926e+131	-1.7424e+132	-4.69267e+131	3.25755e+133	1.6334	0.986949	0.986949	0	6	1.45769	0.966143	0.966143	0	6		2.38137	4.56394	-0.223209	0.0235361	12.9468	10.3209	2.19763	-1.06353e+11	1.51576e+12	1.52355e+12	1.23643e+11	-2.67678e+12	-1.32131e+12	0	1.6334	0.986949	0.993409	0	6	1.45769	1.44317	0.993409	0	6
-0.326032	21.8587	4.01436	-0.559985	12.5397	10.8724	6.57908	-8.38565e+132	1.13267e+133	2.31437e+133	1.00689e+133	-1.78075e+132	-6.8827e+132	5.33628e+133	1.70794	0.963946	0.963946	0	6	1.08587	0.992293	0.992293	0	6		2.42021	4.89941	1.14402	0.0251148	12.9123	10.3252	2.27762	-9.22578e+10	2.15816e+12	1.95668e+12	1.50917e+11	-3.01856e+12	-1.56025e+12	3.18025e+11	1.70794	0.963946	0.993409	0	6	0.999501	0.977946	0.977946	0	6
50.1263	-300.841	-62.8062	11.4322	19.6563	2.5095	0	-1.01289e+133	-3.79149e+133	-3.80461e+133	1.32414e+133	2.48041e+132	-6.82986e+132	0	1.64876	0.965571	0.965571	0	6	1.45769	0.966143	0.966143	0	6		2.24699	5.2098	0.108721	0.029514	12.8968	10.3289	2.24838	-1.1934e+11	1.70086e+12	1.7096e+12	1.38742e+11	-3.00366e+12	-1.48266e+12	0	1.64876	0.965571	0.993409	0	6	1.45769	1.44317	0.993409	0	6
2.28779	4.20677	-0.191453	0.0785183	12.877	10.4797	0.64235	-2.07273e+133	4.45436e+130	-3.31528e+133	3.10353e+132	-2.49051e+133	-1.4369e+133	1.68576e+132	1.60227	0.966993	0.966993	0	6	0.999501	0.916266	0.916266	0	6		2.31584	4.51969	0.386912	0.0277443	12.8686	10.3917	2.20884	-1.03524e+11	2.4217e+12	2.19562e+12	1.69346e+11	-3.38717e+12	-1.75078e+12	3.56861e+11	1.60227	0.966993	0.993409	0	6	0.999501	0.977946	0.977946	0	6
2.45046	3.78397	0.938638	-0.186123	12.816	10.3782	0.401866	4.22568e+133	1.01198e+134	1.25563e+134	-9.82466e+132	-2.89689e+133	-7.80198e+132	5.41597e+134	1.5993	0.966852	0.966852	0	6	1.45769	0.966143	0.966143	0	6		2.31955	5.16959	1.79117	-0.280657	12.7835	10.3102	2.49929	-1.33913e+11	1.90856e+12	1.91837e+12	1.55684e+11	-3.37045e+12	-1.66371e+12	0	1.5993	0.966852	0.993409	0	6	1.45769	1.44317	0.993409	0	6
1.08869	13.7363	4.12211	-0.509432	12.5534	11.4307	3.99845	-1.39419e+134	1.88317e+134	3.84784e+134	1.67404e+134	-2.96065e+133	-1.14431e+134	8.87204e+134	1.77745	0.954431	0.954431	0	6	1.08587	0.992293	0.992293	0	6		2.31717	4.68452	2.52227	-0.28073	12.8203	10.3448	2.50609	-1.16166e+11	2.71743e+12	2.46374e+12	1.90026e+11	-3.80079e+12	-1.96458e+12	4.00439e+11	1.77745	0.954431	0.993409	0	6	0.999501	0.977946	0.977946	0	6
0.652308	17.4007	5.19105	-0.622063	12.326	11.7036	5.32358	-1.68401e+134	-6.30369e+134	-6.3255e+134	2.20149e+134	4.1239e+133	-1.13552e+134	0	1.72774	0.959939	0.959939	0	6	1.45769	0.966143	0.966143	0	6		2.38299	4.49811	2.75931	-0.285354	12.7067	10.1864	2.76802	-1.50266e+11	2.14162e+12	2.15263e+12	1.74696e+11	-3.78203e+12	-1.86688e+12	0	1.72774	0.959939	0.993409	0	6	1.45769	1.44317	0.993409	0	6
0.225169	18.2048	5.17134	-0.753215	12.2312	11.7865	5.84007	-3.4461e+134	7.40576e+131	-5.51194e+134	5.15988e+133	-4.1407e+134	-2.38897e+134	2.80273e+133	1.72049	0.960516	0.960516	0	6	0.999501	0.916266	0.916266	0	6		2.10213	4.15273	2.4564	-0.380836	12.6455	10.1532	2.86054	-1.30351e+11	3.04926e+12	2.7646e+12	2.13231e+11	-4.26493e+12	-2.20448e+12	4.49339e+11	1.72049	0.960516	0.993409	0	6	0.999501	0.977946	0.977946	0	6
3.85463	-10.0627	-1.88193	0.0900101	13.075	8.70803	0	7.02555e+134	1.68251e+135	2.08759e+135	-1.63344e+134	-4.81634e+134	-1.29715e+134	9.00452e+135	1.71866	0.967863	0.967863	0	6	1.45769	0.966143	0.966143	0	6		2.1358	4.26118	2.1721	-0.382515	12.6472	10.1548	3.12915	-1.68616e+11	2.40315e+12	2.4155e+12	1.96029e+11	-4.24387e+12	-2.09485e+12	0	1.71866	0.967863	0.993409	0	6	1.45769	1.44317	0.993409	0	6
2.77868	-0.785516	-0.0065396	-0.08405	12.721	9.62277	0	-2.31796e+135	3.13093e+135	6.39736e+135	2.78324e+135	-4.92235e+134	-1.90251e+135	1.47505e+136	1.66005	0.97562	0.97562	0	6	1.08587	0.992293	0.992293	0	6		2.23709	4.21822	1.85372	-0.28427	12.5721	10.0237	3.19472	-1.46269e+11	3.42163e+12	3.10219e+12	2.39269e+11	-4.78574e+12	-2.47368e+12	5.0421e+11	1.66005	0.97562	0.993409	0	6	0.999501	0.977946	0.977946	0	6
3.16789	-5.16016	-1.01694	-0.140516	12.7952	9.11944	0	-2.79982e+135	-1.04804e+136	-1.05167e+136	3.66017e+135	6.85635e+134	-1.88791e+135	0	1.58179	0.97391	0.97391	0	6	1.45769	0.966143	0.966143	0	6		2.01689	4.54932	1.96527	-0.484	12.5099	9.98968	3.17618	-1.89206e+11	2.69661e+12	2.71047e+12	2.19967e+11	-4.76212e+12	-2.35067e+12	0	1.58179	0.97391	0.993409	0	6	1.45769	1.44317	0.993409	0	6
2.42547	0.469096	1.72972	-0.408488	12.6249	9.68113	0	-5.72944e+135	1.23127e+133	-9.16408e+135	8.57876e+134	-6.88427e+135	-3.97187e+135	4.65978e+134	1.72148	0.978108	0.978108	0	6	0.999501	0.916266	0.916266	0	6		1.98569	4.66933	3.37866	-0.582363	12.4991	10.0086	3.12432	-1.64131e+11	3.83946e+12	3.48102e+12	2.68488e+11	-5.37015e+12	-2.77576e+12	5.65782e+11	1.72148	0.978108	0.993409	0	6	0.999501	0.977946	0.977946	0	6
2.29746	1.18786	2.54758	-0.3175	12.4753	9.56142	0	1.16806e+136	2.79732e+136	3.47081e+136	-2.71573e+135	-8.00759e+135	-2.15662e+135	1.49708e+137	1.7777	0.980925	0.980925	0	6	1.45769	0.966143	0.966143	0	6		1.89516	5.09258	4.11865	-0.481645	12.358	9.86217	3.11161	-2.12311e+11	3.0259e+12	3.04145e+12	2.46828e+11	-5.34364e+12	-2.63772e+12	0	1.7777	0.980925	0.993409	0	6	1.45769	1.44317	0.993409	0	6
2.36747	0.169188	1.85825	-0.394361	12.4539	9.51673	0	-3.85381e+136	5.20545e+136	1.06362e+137	4.62738e+136	-8.18383e+135	-3.1631e+136	2.45241e+137	1.71642	0.979005	0.979005	0	6	1.08587	0.992293	0.992293	0	6		1.85679	4.7966	3.48437	-0.570215	12.3151	9.92257	2.88975	-1.84174e+11	4.30831e+12	3.9061e+12	3.01274e+11	-6.02593e+12	-3.11472e+12	6.34872e+11	1.71642	0.979005	0.993409	0	6	0.999501	0.977946	0.977946	0	6
1.59352	3.88072	2.72371	-0.507971	12.2007	9.87154	1.2681	-4.65495e+136	-1.74246e+137	-1.74849e+137	6.08536e+136	1.13993e+136	-3.13881e+136	0	1.70229	0.991422	0.991422	0	6	1.45769	0.966143	0.966143	0	6		1.58056	4.60361	3.46902	-0.575367	12.1795	9.81954	3.16284	-2.38238e+11	3.39541e+12	3.41286e+12	2.7697e+11	-5.99618e+12	-2.95983e+12	0	1.70229	0.991422	0.993409	0	6	1.45769	1.44317	0.993409	0	6
1.51747	5.26004	3.91421	-0.546997	12.0607	9.93179	1.74559	-9.52569e+136	2.0471e+134	-1.52361e+137	1.42629e+136	-1.14457e+137	-6.60358e+136	7.74729e+135	1.64861	0.966242	0.966242	0	6	0.999501	0.916266	0.916266	0	6		1.68403	4.61537	4.3776	-0.58009	12.0809	9.71074	3.3223	-2.06664e+11	4.83442e+12	4.38309e+12	3.38065e+11	-6.76178e+12	-3.49508e+12	7.124e+11	1.64861	0.966242	0.993409	0	6	0.999501	0.977946	0.977946	0	6
1.80505	5.08788	3.80807	-0.640875	12.052	9.88239	1.76235	1.942e+137	4.65079e+137	5.77052e+137	-4.51514e+136	-1.33133e+137	-3.58557e+136	2.48903e+138	1.64381	0.96869	0.96869	0	6	1.45769	0.966143	0.966143	0	6		1.94224	4.64843	4.2959	-0.67765	12.0659	9.69094	3.33509	-2.6733e+11	3.81004e+12	3.82962e+12	3.10792e+11	-6.72841e+12	-3.32127e+12	0	1.64381	0.96869	0.993409	0	6	1.45769	1.44317	0.993409	0	6
1.6496	5.10584	3.94068	-0.735077	11.8832	9.72722	1.87617	-6.4073e+137	8.65451e+137	1.76836e+138	7.69343e+137	-1.36063e+137	-5.25892e+137	4.07734e+138	1.65249	0.985021	0.985021	0	6	1.08587	0.992293	0.992293	0	6		1.76102	4.85437	4.45649	-0.775995	11.8915	9.56117	3.46274	-2.31901e+11	5.42478e+12	4.91834e+12	3.79347e+11	-7.5875e+12	-3.92188e+12	7.99395e+11	1.65249	0.985021	0.993409	0	6	0.999501	0.977946	0.977946	0	6
1.97997	5.07614	2.99434	-0.824015	11.6639	9.5029	1.75265	-7.73926e+137	-2.897e+138	-2.90702e+138	1.01174e+138	1.89523e+137	-5.21855e+137	0	1.61774	0.953836	0.953836	0	6	1.45769	0.966143	0.966143	0	6		2.04324	5.23907	3.64172	-0.879026	11.6597	9.37737	3.56866	-2.99975e+11	4.27531e+12	4.29728e+12	3.48744e+11	-7.55005e+12	-3.72684e+12	0	1.61774	0.953836	0.993409	0	6	1.45769	1.44317	0.993409	0	6
1.9703	5.16214	3.55822	-0.621931	11.5995	9.4102	1.8454	-1.58373e+138	3.40348e+135	-2.53313e+138	2.37134e+137	-1.90295e+138	-1.0979e+138	1.28806e+137	1.65599	0.958519	0.958519	0	6	0.999501	0.916266	0.916266	0	6		2.01954	5.37771	4.16658	-0.673971	11.5936	9.30308	3.52866	-2.60219e+11	6087229801602	5.51894e+12	4.25671e+11	-8.51405e+12	-4.4008e+12	8.97013e+11	1.65599	0.958519	0.993409	0	6	0.999501	0.977946	0.977946	0	6
1.87435	5.052	4.04049	-0.711611	11.4456	9.25471	1.79264	3.22875e+138	7.73234e+138	9.594e+138	-7.50681e+137	-2.21345e+138	-5.96132e+137	4.13823e+139	1.51825	0.950145	0.950145	0	6	1.45769	0.966143	0.966143	0	6		1.86573	5.65125	4.69124	-0.76877	11.4282	9.20414	3.45402	-3.36607e+11	4.79739e+12	4.82204e+12	3.91331e+11	-8.47202e+12	-4.18195e+12	0	1.51825	0.950145	0.993409	0	6	1.45769	1.44317	0.993409	0	6
1.94804	5.1391	5.34989	-0.809897	11.2719	9.14617	1.81044	-1.06527e+139	1.43889e+139	2.94005e+139	1.2791e+139	-2.26217e+138	-8.74342e+138	6.77894e+139	1.52748	0.951445	0.951445	0	6	1.08587	0.992293	0.992293	0	6		1.94572	5.68618	5.988	-0.865427	11.2561	9.08963	3.45371	-2.91996e+11	6.83057e+12	6.19288e+12	4.77652e+11	-9.55375e+12	-4.9382e+12	1.00655e+12	1.52748	0.951445	0.993409	0	6	0.999501	0.977946	0.977946	0	6
1.92457	4.00982	5.40476	-0.896564	11.208	9.00966	1.70387	-1.28672e+139	-4.81651e+139	-4.83318e+139	1.68211e+139	3.15098e+138	-8.6763e+138	0	1.56655	0.953392	0.953392	0	6	1.45769	0.966143	0.966143	0	6		1.86569	4.97937	6.14858	-0.962044	11.1796	9.00154	3.49215	-3.77711e+11	5.38322e+12	5.41088e+12	4.39119e+11	-9.50659e+12	-4.69263e+12	0	1.56655	0.953392	0.993409	0	6	1.45769	1.44317	0.993409	0	6
2.09174	3.78599	3.86221	-0.780455	10.9653	8.85151	1.74507	-2.63309e+139	5.65858e+136	-4.21155e+139	3.94256e+138	-3.16382e+139	-1.82536e+139	2.1415e+138	1.58716	0.95562	0.95562	0	6	0.999501	0.916266	0.916266	0	6		1.95802	5.34082	4.78736	-0.861902	10.9195	8.90223	3.83316	-3.27653e+11	7.66469e+12	6.94913e+12	5.35981e+11	-1.07204e+13	-5.54124e+12	1.12947e+12	1.58716	0.95562	0.993409	0	6	0.999501	0.977946	0.977946	0	6

## Sheet: Comparizon Obs 11
Comparison VAR/VSTAR observation 11
Outcome using main										Outcome using LinearEstimationControl
	s	p	ip	u	TS	PS	R			s	p	ip	u	TS	PS	R
VAR	2.59881	8.92615	-5.92945	1.42558	4.22889	1.4698	8.5546			2.59881	8.92615	-5.92945	1.42558	4.22889	1.4698	8.5546
VSTAR	7.40779	25.4237	23.9213	-1.41383	3.08878	0.447268	87.8623			7.40779	25.4237	23.9213	-1.41383	3.08878	0.447268	87.8623
VSTAR corr	2.59881	8.92615	-5.92945	1.42558	4.22889	1.4698	8.5546
VAR at obs 10	7.40779	24.7904	25.2417	0	3.12166	0.659368	87.8623
	2.11918e-07	0.633289	-1.32032	-1.41383	-0.0328817	-0.2121	3.46982e-06
Main										LinearEstimationControl
VARstar										VARstar
0.483773	0.866113	-0.0196487	-0.00568973	-0.0157036	-0.0136761	0.0158699	-0.000192172			0.483773	0.866113	-0.0196487	-0.00568973	-0.0157036	-0.0136761	0.0158699	-0.000192172		0	0	0	0	0	0	0	0
1.15672	-0.0798792	0.799006	0.00597931	0.0125491	0.0308074	-0.0282143	0.0139894			1.15672	-0.0798792	0.799006	0.00597931	0.0125491	0.0308074	-0.0282143	0.0139894		0	0	0	0	0	0	0	0
2.55521	-0.44249	-0.0961835	0.921756	0.0358573	-0.0541644	0.0349456	-0.13114			2.55521	-0.44249	-0.0961835	0.921756	0.0358573	-0.0541644	0.0349456	-0.13114		0	0	0	0	0	0	0	0
-0.0732869	0.0329827	-0.00721094	-0.0066296	0.983358	-0.00601936	0.00163597	0.0198327			-0.0732869	0.0329827	-0.00721094	-0.0066296	0.983358	-0.00601936	0.00163597	0.0198327		0	0	0	0	0	0	0	0
0.0943841	-0.017342	-0.0056696	0.00272388	0.0305607	0.991578	0.00604056	-0.00126276			0.0943841	-0.017342	-0.0056696	0.00272388	0.0305607	0.991578	0.00604056	-0.00126276		0	0	0	0	0	0	0	0
-0.049806	-0.0213077	0.0332196	-0.0106363	0.0140836	-0.00445129	0.99325	-0.0041987			-0.049806	-0.0213077	0.0332196	-0.0106363	0.0140836	-0.00445129	0.99325	-0.0041987		0	0	0	0	0	0	0	0
3.80451	0.0869264	-0.38325	-0.0106312	-0.495612	-0.184685	0.18369	0.824465			3.80451	0.0869264	-0.38325	-0.0106312	-0.495612	-0.184685	0.18369	0.824465		0	0	0	0	0	0	0	0
ylag										ylag
1	2.59881	8.92615	-5.92945	1.42558	4.22889	1.4698	8.5546			1	2.92	9.06467	-4.40755	1.29333	4.30235	1.66798	10.98
ustar										ustar
-0.206191										-0.206191		0							0
0.530984										0.530984		0							0
-0.689746										-0.689746		0							0
-0.0277005										-0.0277005		0							0
-0.0533081										-0.0533081		0							0
-0.375863										-0.375863		0							0
0										0									0
Atildat										Atildat
0.864101	-0.0107785	-0.00544368	-0.00423293	-0.00940171	0.0116186	-0.0192739				0.864101	-0.0107785	-0.00544368	-0.00423293	-0.00940171	0.0116186	-0.0192739		0	0	0	0	0	0	0
-0.0946479	0.86412	0.00778555	0.0967527	0.0621852	-0.0594229	-0.126086				-0.0946479	0.86412	0.00778555	0.0967527	0.0621852	-0.0594229	-0.126086		0	0	0	0	0	0	0
-0.474377	0.0444055	0.925656	0.217665	0.0135844	-0.032438	-0.433582				-0.474377	0.0444055	0.925656	0.217665	0.0135844	-0.032438	-0.433582		0	0	0	0	0	0	0
0.0357284	-0.0193165	-0.0069654	0.967703	-0.0118529	0.00743809	0.0458747				0.0357284	-0.0193165	-0.0069654	0.967703	-0.0118529	0.00743809	0.0458747		0	0	0	0	0	0	0
-0.0169299	-0.00748679	0.00267347	0.0282107	0.990702	0.00691153	0.00264647				-0.0169299	-0.00748679	0.00267347	0.0282107	0.990702	0.00691153	0.00264647		0	0	0	0	0	0	0
-0.016297	0.0111279	-0.0112491	-0.014485	-0.0150971	1.00384	0.043326				-0.016297	0.0111279	-0.0112491	-0.014485	-0.0150971	1.00384	0.043326		0	0	0	0	0	0	0
ctildat										ctildat
0.39572										0.39572		0
0.510344										0.510344		0
1.15959										1.15959		0
0.0468841										0.0468841		0
0.112423										0.112423		0									0	0	0
0.169498										0.169498		0
[truncated: 7 more rows]

## Sheet: OptimalControlAnalysis_VSTARC
VSTARC: without the stability help																									VSTAR: with the stability help
[truncated: 473 more rows]
